# Supplementary material for: Temporal profiling of redox-dependent heterogeneity in single cells
Source: eLife journal article supplement (doi:10.7554/elife.37623), 2018-06-05
Supplement: supp [file elife-37623-supp-v1.zip]

Archive with 29 entries (29 files):
- elife_poa_e37623_Figure_7_figure_supplement_2.tif
- elife_poa_e37623_Supplementary_File_3.xlsx
- elife_poa_e37623_Figure_6_figure_supplement_1.tif
- elife_poa_e37623_Figure_6_figure_supplement_3.tif
- elife_poa_e37623_Figure_1_figure_supplement_2.tif
- elife_poa_e37623_Supplementary_File_9.csv
- elife_poa_e37623_Supplementary_File_2.xlsx
- elife_poa_e37623_Video_4.avi
- elife_poa_e37623_Supplementary_File_8.csv
- elife_poa_e37623_Supplementary_File_7.csv
- elife_poa_e37623_Supplementary_File_11.csv
- elife_poa_e37623_Supplementary_File_1.docx
- elife_poa_e37623_Video_2.avi
- elife_poa_e37623_Video_3.avi
- elife_poa_e37623_Supplementary_File_5.docx
- elife_poa_e37623_Supplementary_File_12.docx
- elife_poa_e37623_Figure_6_figure_supplement_2.tif
- elife_poa_e37623_Video_1..avi
- elife_poa_e37623_Figure_7_figure_supplement_3.tif
- elife_poa_e37623_Figure_8_figure_supplement_1.tif
- elife_poa_e37623_Figure_7_figure_supplement_4.tif
- elife_poa_e37623_Figure_8_figure_supplement_2.tif
- elife_poa_e37623_Transparent_Reporting_File.pdf
- elife_poa_e37623_Supplementary_File_4.xlsx
- elife_poa_e37623_Supplementary_File_6.csv
- elife_poa_e37623_Figure_7_figure_supplement_1.tif
- elife_poa_e37623_Supplementary_File_10.csv
- elife_poa_e37623_Figure_2_figure_supplement_1.tif
- elife_poa_e37623_Figure_1_figure_supplement_1.tif
