# Supplementary material for: Temporal profiling of redox-dependent heterogeneity in single cells
Source: eLife journal article supplement (doi:10.7554/elife.37623), 2018-06-05
Supplement: supp [file elife-37623-supp-v1.zip › elife_poa_e37623_Supplementary_File_1.docx]

**Supplementary File 1.** Comparison of OxD values of wild type and knockout strains (related to Figure 2F).

| Strain | cytosol | peroxisome |
| --- | --- | --- |
| *Δpex3* | 9.0E-01 | < 1.0E-05 |
| *Δcat2* | 2.5E-01 | 1.0E-03 |
| *Δatg36* | 1.6E-01 | < 1.0E-05 |
| *Δahp1* | 4.0E-01 | 1.0E-03 |

The p-values for T-student test calculated using two tail similar variance.
