# Supplementary material for: Temporal profiling of redox-dependent heterogeneity in single cells
Source: eLife journal article supplement (doi:10.7554/elife.37623), 2018-06-05
Supplement: supp [file elife-37623-supp-v1.zip › elife_poa_e37623_Supplementary_File_2.xlsx]

## Sheet: Sheet1
Entry	Entry name	Protein names	Gene names	reduced 72h (median z-score)	reduced 48h (median z-score)	oxidized 72h (median z-score)	oxidized 48h (median z-score)	GOBP name	GOMF name	GOCC name	Cluster	Peptides	Razor + unique peptides	Unique peptides	Sequence coverage [%]	Unique + razor sequence coverage [%]	Unique sequence coverage [%]	Mol. weight [kDa]	Length
P0CX30	RS23B_YEAST	40S ribosomal protein S23-B (RP37) (S28) (Small ribosomal subunit protein uS12-B) (YS14)	RPS23B RPS28B YPR132W P9659.9	-0.0502283	-0.986584	-0.343754	1.38057	structural constituent of ribosome;structural molecule activity	cell part;cytosolic small ribosomal subunit;intracellular organelle part;intracellular part;macromolecular complex;organelle part;ribonucleoprotein complex;small ribosomal subunit	biological regulation;biosynthetic process;cellular metabolic process;cellular nitrogen compound metabolic process;cellular process;macromolecule metabolic process;metabolic process;nitrogen compound metabolic process;nucleobase-containing compound metabolic process;primary metabolic process;protein metabolic process;regulation of translation;RNA metabolic process;RNA processing;rRNA processing;t…	1	12	12	12	52.4	52.4	52.4	16.038	145
P05749	RL22A_YEAST	60S ribosomal protein L22-A (L1c) (Large ribosomal subunit protein eL22-A) (RP4) (YL31)	RPL22A YLR061W L2168	0.0951119	-0.889083	-0.573913	1.36789	structural constituent of ribosome;structural molecule activity	cell part;cytosolic large ribosomal subunit;intracellular organelle part;intracellular part;large ribosomal subunit;macromolecular complex;organelle part;ribonucleoprotein complex	biosynthetic process;cellular metabolic process;cellular process;cytoplasmic translation;macromolecule metabolic process;metabolic process;primary metabolic process;protein metabolic process;translation	1	5	5	3	67.8	67.8	55.4	13.693	121
P34730	BMH2_YEAST	Protein BMH2	BMH2 YDR099W YD8557.08	-0.057237	-1.02858	-0.278442	1.36426	amine binding;amino acid binding;binding;carboxylic acid binding;DNA binding;DNA replication origin binding;nucleic acid binding;phosphoprotein binding;phosphoserine binding;protein binding;protein phosphorylated amino acid binding;sequence-specific DNA binding	cell part;cytoplasm;intracellular membrane-bounded organelle;intracellular organelle;intracellular part;membrane-bounded organelle;nucleus;organelle	amine metabolic process;anatomical structure development;anatomical structure formation involved in morphogenesis;ascospore formation;biological regulation;biosynthetic process;carbohydrate metabolic process;cell development;cell differentiation;cell growth;cell wall organization or biogenesis;cellular cell wall organization or biogenesis;cellular component assembly;cellular component organizatio…	1	25	7	7	67.4	19	19	31.061	273
P23301	IF5A1_YEAST	Eukaryotic translation initiation factor 5A-1 (eIF-5A-1) (Hypusine-containing protein HP2) (eIF-4D)	HYP2 TIF51A YEL034W SYGP-ORF21	0.372971	-1.09427	-0.477002	1.1983	binding;nucleic acid binding;ribonucleoprotein binding;ribosome binding;RNA binding;translation elongation factor activity;translation factor activity, nucleic acid binding;translation initiation factor activity	cell part;cytoplasmic part;cytosolic part;cytosolic ribosome;intracellular non-membrane-bounded organelle;intracellular organelle;intracellular part;macromolecular complex;non-membrane-bounded organelle;organelle;ribonucleoprotein complex;ribosome	biological regulation;cellular process;regulation of translation;translational initiation	1	18	18	14	87.3	87.3	77.7	17.114	157
P06245	KAPB_YEAST	cAMP-dependent protein kinase type 2 (PKA 2) (EC 2.7.11.11)	TPK2 PKA2 YKR1 YPL203W	0.441472	-1.27505	-0.228154	1.06174	adenyl nucleotide binding;adenyl ribonucleotide binding;ATP binding;binding;cAMP-dependent protein kinase activity;catalytic activity;cyclic nucleotide-dependent protein kinase activity;kinase activity;nucleotide binding;phosphotransferase activity, alcohol group as acceptor;protein kinase activity;protein serine/threonine kinase activity;purine nucleotide binding;purine ribonucleoside triphospha…	cAMP-dependent protein kinase complex;cell part;cytoplasmic part;cytosol;intracellular membrane-bounded organelle;intracellular organelle;intracellular part;macromolecular complex;membrane-bounded organelle;nucleus;organelle;protein complex	biological regulation;cellular metabolic process;cellular process;filamentous growth;growth;growth of unicellular organism as a thread of attached cells;invasive growth in response to glucose limitation;macromolecule metabolic process;macromolecule modification;metabolic process;phosphorus metabolic process;primary metabolic process;protein metabolic process;protein modification process;protein p…	1	14	14	11	41.8	41.8	35.5	44.219	380
P89886	TMA20_YEAST	Translation machinery-associated protein 20	TMA20 YER007C-A	0.301701	-1.04196	-0.510011	1.25027	binding;nucleic acid binding;RNA binding	cell part;cytoplasmic part;cytosol;intracellular part	biosynthetic process;cellular metabolic process;cellular process;macromolecule metabolic process;metabolic process;primary metabolic process;protein metabolic process;ribosome biogenesis;translation	1	12	12	12	76.8	76.8	76.8	20.277	181
P38325	OM14_YEAST	Mitochondrial outer membrane protein OM14 (Outer membrane protein of 14 kDa)	OM14 YBR230C YBR1527	0.387251	-1.18265	-0.355644	1.15104		cell part;cytoplasmic part;integral to membrane;integral to mitochondrial membrane;integral to mitochondrial outer membrane;integral to organelle membrane;intracellular organelle part;intracellular part;intrinsic to membrane;intrinsic to mitochondrial outer membrane;intrinsic to organelle membrane;membrane part;mitochondrial membrane part;mitochondrial part;organelle part	cellular localization;cellular process;establishment of localization;localization;organelle localization;protein targeting;protein transport;transport	1	2	2	2	6.7	6.7	6.7	14.609	134
Q12522	IF6_YEAST	Eukaryotic translation initiation factor 6 (eIF-6)	TIF6 CDC95 YPR016C LPZ15C	0.245038	-1.24277	-0.171107	1.16884	binding;nucleic acid binding;ribonucleoprotein binding;ribosomal large subunit binding;ribosome binding;RNA binding;translation factor activity, nucleic acid binding;translation initiation factor activity	cell part;cytoplasm;intracellular membrane-bounded organelle;intracellular non-membrane-bounded organelle;intracellular organelle;intracellular organelle part;intracellular part;macromolecular complex;membrane-bounded organelle;non-membrane-bounded organelle;nuclear part;nucleolus;nucleus;organelle;organelle part;preribosome;preribosome, large subunit precursor;ribonucleoprotein complex	cellular component assembly;cellular component organization;cellular localization;cellular macromolecular complex assembly;cellular metabolic process;cellular nitrogen compound metabolic process;cellular process;establishment of localization;localization;macromolecular complex assembly;macromolecule metabolic process;metabolic process;nitrogen compound metabolic process;nuclear transport;nucleoba…	1	5	5	5	28.2	28.2	28.2	26.457	245
P0CX38	RS6B_YEAST	40S ribosomal protein S6-B (RP9) (S10) (Small ribosomal subunit protein eS6-B) (YS4)	RPS6B RPS102 RPS10A YBR181C YBR1244	-0.243572	-0.28974	-0.898358	1.43167	structural constituent of ribosome;structural molecule activity	cell part;cytosolic small ribosomal subunit;intracellular non-membrane-bounded organelle;intracellular organelle;intracellular organelle part;intracellular part;macromolecular complex;non-membrane-bounded organelle;nuclear part;nucleolus;organelle;organelle part;preribosome;ribonucleoprotein complex;small ribosomal subunit;small-subunit processome	biosynthetic process;cellular metabolic process;cellular nitrogen compound metabolic process;cellular process;cytoplasmic translation;macromolecule metabolic process;metabolic process;nitrogen compound metabolic process;nucleobase-containing compound metabolic process;primary metabolic process;protein metabolic process;RNA metabolic process;RNA processing;rRNA processing;translation	1	21	21	21	61.9	61.9	61.9	26.996	236
P06168	ILV5_YEAST	Ketol-acid reductoisomerase, mitochondrial (EC 1.1.1.86) (Acetohydroxy-acid reductoisomerase) (Alpha-keto-beta-hydroxylacyl reductoisomerase)	ILV5 YLR355C L9638.7	-0.375722	0.0134981	-1.00063	1.36286	binding;catalytic activity;cation binding;coenzyme binding;cofactor binding;DNA binding;double-stranded DNA binding;ion binding;ketol-acid reductoisomerase activity;metal ion binding;nucleic acid binding;oxidoreductase activity;oxidoreductase activity, acting on CH-OH group of donors;oxidoreductase activity, acting on the CH-OH group of donors, NAD or NADP as acceptor;structure-specific DNA bindi…	cell part;cytoplasmic part;intracellular membrane-bounded organelle;intracellular non-membrane-bounded organelle;intracellular organelle;intracellular organelle part;intracellular part;membrane-bounded organelle;mitochondrial nucleoid;mitochondrial part;mitochondrion;non-membrane-bounded organelle;nucleoid;organelle;organelle part	amine metabolic process;biosynthetic process;cellular amino acid metabolic process;cellular component organization;cellular ketone metabolic process;cellular metabolic process;cellular nitrogen compound metabolic process;cellular process;metabolic process;mitochondrion organization;nitrogen compound metabolic process;organelle organization;organic acid metabolic process;primary metabolic process;…	1	33	33	33	75.2	75.2	75.2	44.368	395
Q12428	PRPD_YEAST	Probable 2-methylcitrate dehydratase (2-MC dehydratase) (EC 4.2.1.79) ((2S,3S)-2-methylcitrate dehydratase)	PDH1 YPR002W LPZ2W YP9723.02	-0.145792	-0.35106	-0.920349	1.4172	2 iron, 2 sulfur cluster binding;2-methylcitrate dehydratase activity;binding;carbon-oxygen lyase activity;catalytic activity;hydro-lyase activity;iron-sulfur cluster binding;lyase activity;metal cluster binding		catabolic process;cellular ketone metabolic process;cellular metabolic process;cellular process;metabolic process;organic acid metabolic process;small molecule metabolic process	1	23	23	23	52.1	52.1	52.1	57.683	516
P32377	MVD1_YEAST	Diphosphomevalonate decarboxylase (EC 4.1.1.33) (Ergosterol biosynthesis protein 19) (Mevalonate pyrophosphate decarboxylase) (Mevalonate-5-diphosphate decarboxylase) (MDD) (MDDase)	MVD1 ERG19 MPD YNR043W N3427	-0.243958	-0.281508	-0.904139	1.42961	adenyl nucleotide binding;adenyl ribonucleotide binding;ATP binding;binding;carbon-carbon lyase activity;carboxy-lyase activity;catalytic activity;diphosphomevalonate decarboxylase activity;lyase activity;nucleotide binding;purine nucleotide binding;purine ribonucleoside triphosphate binding;purine ribonucleotide binding;ribonucleotide binding	cell part;cytoplasmic part;cytosol;intracellular part	alcohol metabolic process;biosynthetic process;cellular lipid metabolic process;cellular metabolic process;cellular process;cofactor metabolic process;isopentenyl diphosphate metabolic process;lipid metabolic process;metabolic process;primary metabolic process;small molecule metabolic process	1	21	21	21	61.6	61.6	61.6	44.115	396
P32463	ACPM_YEAST	Acyl carrier protein, mitochondrial (ACP) (NADH-ubiquinone oxidoreductase 9.6 kDa subunit)	ACP1 YKL192C	-0.394235	-0.0644509	-0.940107	1.39879	acyl carrier activity;substrate-specific transporter activity;transporter activity	cell part;cytoplasmic part;intracellular membrane-bounded organelle;intracellular organelle;intracellular part;membrane part;membrane-bounded organelle;mitochondrion;organelle;respiratory chain	biosynthetic process;cellular ketone metabolic process;cellular lipid metabolic process;cellular metabolic process;cellular process;cofactor metabolic process;heterocycle metabolic process;lipid metabolic process;metabolic process;organic acid metabolic process;primary metabolic process;small molecule metabolic process;sulfur compound metabolic process	1	3	3	3	30.4	30.4	30.4	13.943	125
P10080	SSBP1_YEAST	Single-stranded nucleic acid-binding protein	SBP1 SSB1 SSBR1 YHL034C	-0.473409	-0.212105	-0.774366	1.45988	binding;eukaryotic initiation factor 4G binding;mRNA binding;nucleic acid binding;nucleotide binding;protein binding;RNA binding;translation initiation factor binding	cell part;cytoplasm;cytoplasmic mRNA processing body;cytoplasmic part;intracellular non-membrane-bounded organelle;intracellular organelle;intracellular organelle part;intracellular part;macromolecular complex;non-membrane-bounded organelle;nuclear part;nucleolus;organelle;organelle part;ribonucleoprotein complex;RNA granule;stress granule	biological regulation;cellular process;regulation of translation;response to stimulus;response to stress	1	21	21	21	72.4	72.4	72.4	32.989	294
P80210	PURA_YEAST	Adenylosuccinate synthetase (AMPSase) (AS-synthetase) (AdSS) (EC 6.3.4.4) (IMP--aspartate ligase)	ADE12 YNL220W N1290	0.0197426	0.0922081	-1.27762	1.16567	adenylosuccinate synthase activity;binding;catalytic activity;cation binding;DNA binding;DNA replication origin binding;GTP binding;guanyl nucleotide binding;guanyl ribonucleotide binding;ion binding;ligase activity;ligase activity, forming carbon-nitrogen bonds;magnesium ion binding;metal ion binding;nucleic acid binding;nucleotide binding;purine nucleotide binding;purine ribonucleoside triphosp…	cell part;cytoplasm;intracellular part	biosynthetic process;cellular metabolic process;cellular nitrogen compound metabolic process;cellular process;heterocycle metabolic process;metabolic process;nitrogen compound metabolic process;nucleobase-containing compound metabolic process;nucleobase-containing small molecule metabolic process;nucleotide metabolic process;primary metabolic process;small molecule metabolic process	1	30	30	30	61.7	61.7	61.7	48.279	433
P00498	HIS1_YEAST	ATP phosphoribosyltransferase (ATP-PRT) (ATP-PRTase) (EC 2.4.2.17)	HIS1 YER055C	0.205889	-0.0395998	-1.29604	1.12975	adenyl nucleotide binding;adenyl ribonucleotide binding;ATP binding;ATP phosphoribosyltransferase activity;binding;catalytic activity;cation binding;ion binding;magnesium ion binding;metal ion binding;nucleotide binding;purine nucleotide binding;purine ribonucleoside triphosphate binding;purine ribonucleotide binding;ribonucleotide binding;transferase activity;transferase activity, transferring g…	cell part;cytoplasm;intracellular part	amine metabolic process;biosynthetic process;cellular amino acid metabolic process;cellular ketone metabolic process;cellular metabolic process;cellular nitrogen compound metabolic process;cellular process;heterocycle metabolic process;metabolic process;nitrogen compound metabolic process;organic acid metabolic process;primary metabolic process;small molecule metabolic process	1	23	23	23	72.1	72.1	72.1	32.266	297
Q04491	SEC13_YEAST	Protein transport protein SEC13	SEC13 ANU3 YLR208W L8167.4	0.160612	-0.063987	-1.26598	1.16936	binding;identical protein binding;protein binding;structural molecule activity	cell part;COPII vesicle coat;cytoplasmic part;cytoplasmic vesicle part;endoplasmic reticulum membrane;endoplasmic reticulum part;Golgi apparatus part;Golgi membrane;intracellular organelle part;intracellular part;macromolecular complex;membrane;membrane coat;membrane part;nuclear part;Nup107-160 complex;organelle membrane;organelle part;protein complex;Seh1-associated complex;vacuolar membrane;va…	biological regulation;catabolic process;cellular component organization;cellular localization;cellular membrane organization;cellular metabolic process;cellular process;establishment of localization;localization;macromolecule metabolic process;membrane organization;metabolic process;nucleobase-containing compound transport;nucleus organization;organelle organization;primary metabolic process;prot…	1	19	19	19	76.4	76.4	76.4	33.043	297
Q08220	GSHB_YEAST	Glutathione synthetase (GSH synthetase) (GSH-S) (EC 6.3.2.3) (Glutathione synthase)	GSH2 YOL049W	-0.0219379	-0.113306	-1.15253	1.28777	acid-amino acid ligase activity;adenyl nucleotide binding;adenyl ribonucleotide binding;amine binding;amino acid binding;ATP binding;binding;carboxylic acid binding;catalytic activity;cation binding;glutathione binding;glutathione synthase activity;identical protein binding;ion binding;ligase activity;ligase activity, forming carbon-nitrogen bonds;magnesium ion binding;metal ion binding;modified …	cell part;intracellular	amine metabolic process;biosynthetic process;cellular amino acid metabolic process;cellular ketone metabolic process;cellular metabolic process;cellular nitrogen compound metabolic process;cellular process;metabolic process;nitrogen compound metabolic process;organic acid metabolic process;peptide metabolic process;primary metabolic process;small molecule metabolic process;sulfur compound metabol…	1	17	17	17	45.2	45.2	45.2	55.815	491
Q01976	ADPP_YEAST	ADP-ribose pyrophosphatase (EC 3.6.1.13) (ADP-ribose diphosphatase) (ADP-ribose phosphohydrolase) (Adenosine diphosphoribose pyrophosphatase) (ADPR-PPase)	YSA1 YBR111C YBR0907	0.0118388	0.00249386	-1.23186	1.21753	ADP-ribose diphosphatase activity;ADP-sugar diphosphatase activity;binding;catalytic activity;cation binding;hydrolase activity;hydrolase activity, acting on acid anhydrides;hydrolase activity, acting on acid anhydrides, in phosphorus-containing anhydrides;ion binding;metal ion binding;pyrophosphatase activity	cell part;cytoplasmic part;intracellular membrane-bounded organelle;intracellular organelle;intracellular part;membrane-bounded organelle;mitochondrion;organelle	alcohol metabolic process;carbohydrate metabolic process;cellular metabolic process;cellular process;heterocycle metabolic process;metabolic process;primary metabolic process;small molecule metabolic process	1	13	13	13	50.6	50.6	50.6	26.087	231
Q01519	COX12_YEAST	Cytochrome c oxidase subunit 6B (EC 1.9.3.1) (Cytochrome c oxidase polypeptide VIb)	COX12 YLR038C	-0.267835	0.195638	-1.16544	1.23764	catalytic activity;cation transmembrane transporter activity;cytochrome-c oxidase activity;heme-copper terminal oxidase activity;hydrogen ion transmembrane transporter activity;inorganic cation transmembrane transporter activity;ion transmembrane transporter activity;monovalent inorganic cation transmembrane transporter activity;oxidoreductase activity;oxidoreductase activity, acting on a heme gr…	cell part;cytoplasmic part;intracellular organelle part;intracellular part;macromolecular complex;membrane part;membrane-enclosed lumen;mitochondrial intermembrane space;mitochondrial membrane part;mitochondrial part;mitochondrial respiratory chain complex IV;organelle envelope lumen;organelle part;protein complex;respiratory chain complex IV	cellular component assembly;cellular component organization;cellular macromolecular complex assembly;cellular metabolic process;cellular process;generation of precursor metabolites and energy;macromolecular complex assembly;metabolic process;oxidative phosphorylation;phosphorus metabolic process;protein complex assembly;protein complex biogenesis	1	8	8	8	88	88	88	9.7878	83
Q02642	NACB1_YEAST	Nascent polypeptide-associated complex subunit beta-1 (NAC-beta-1) (BTF3 homolog EGD1) (Beta-1-NAC) (GAL4 DNA-binding enhancer protein 1)	EGD1 YPL037C	0.113115	0.03558	-1.29395	1.14526	binding;protein binding;unfolded protein binding	cell part;cytoplasmic part;intracellular membrane-bounded organelle;intracellular organelle;intracellular part;macromolecular complex;membrane-bounded organelle;nascent polypeptide-associated complex;nucleus;organelle;protein complex	biological regulation;biosynthetic process;cellular metabolic process;cellular nitrogen compound metabolic process;cellular process;establishment of localization;macromolecule metabolic process;metabolic process;nitrogen compound metabolic process;nucleobase-containing compound metabolic process;primary metabolic process;protein folding;protein metabolic process;protein targeting;protein transpor…	1	9	9	9	74.5	74.5	74.5	17.02	157
P38711	RS27B_YEAST	40S ribosomal protein S27-B (RP61) (Small ribosomal subunit protein eS27-B) (YS20)	RPS27B YHR021C	-0.0571516	-0.596112	-0.775186	1.42845	binding;cation binding;ion binding;metal ion binding;structural constituent of ribosome;structural molecule activity	cell part;cytosolic small ribosomal subunit;intracellular organelle part;intracellular part;macromolecular complex;organelle part;ribonucleoprotein complex;small ribosomal subunit	biosynthetic process;cellular component assembly;cellular component organization;cellular macromolecular complex assembly;cellular metabolic process;cellular nitrogen compound metabolic process;cellular process;cytoplasmic translation;macromolecular complex assembly;macromolecule metabolic process;metabolic process;nitrogen compound metabolic process;nucleobase-containing compound metabolic proce…	1	7	7	7	52.4	52.4	52.4	8.8653	82
P21264	PUR6_YEAST	Phosphoribosylaminoimidazole carboxylase (EC 4.1.1.21) (AIR carboxylase) (AIRC)	ADE2 YOR128C O3293 YOR3293C	0.315216	-0.602461	-0.973611	1.26086	adenyl nucleotide binding;adenyl ribonucleotide binding;ATP binding;binding;carbon-carbon lyase activity;carboxy-lyase activity;catalytic activity;cation binding;ion binding;lyase activity;metal ion binding;nucleotide binding;phosphoribosylaminoimidazole carboxylase activity;purine nucleotide binding;purine ribonucleoside triphosphate binding;purine ribonucleotide binding;ribonucleotide binding		biosynthetic process;cellular aromatic compound metabolic process;cellular metabolic process;cellular nitrogen compound metabolic process;cellular process;heterocycle metabolic process;metabolic process;nitrogen compound metabolic process;nucleobase-containing compound metabolic process;nucleobase-containing small molecule metabolic process;nucleotide metabolic process;primary metabolic process;s…	1	32	32	32	61.5	61.5	61.5	62.339	571
P36037	DOA1_YEAST	Protein DOA1	DOA1 UFD3 ZZZ4 YKL213C	0.215951	-0.646162	-0.890177	1.32039	binding;protein binding;small conjugating protein binding;ubiquitin binding	cell part;cytoplasm;intracellular membrane-bounded organelle;intracellular organelle;intracellular part;membrane-bounded organelle;nucleus;organelle	biological regulation;catabolic process;cellular homeostasis;cellular metabolic process;cellular nitrogen compound metabolic process;cellular process;DNA metabolic process;DNA repair;homeostatic process;macromolecule metabolic process;metabolic process;nitrogen compound metabolic process;nucleobase-containing compound metabolic process;primary metabolic process;protein metabolic process;proteolys…	1	30	30	30	49.7	49.7	49.7	79.505	715
P38235	YBQ3_YEAST	Uncharacterized protein YBR053C	YBR053C YBR0506	0.271317	-0.62449	-0.935626	1.2888				1	21	21	21	65.1	65.1	65.1	40.295	358
Q05979	KYNU_YEAST	Kynureninase (EC 3.7.1.3) (Biosynthesis of nicotinic acid protein 5) (L-kynurenine hydrolase)	BNA5 YLR231C L8083.14	0.457608	-0.634409	-1.00075	1.17755	binding;catalytic activity;cofactor binding;hydrolase activity;hydrolase activity, acting on acid carbon-carbon bonds;hydrolase activity, acting on acid carbon-carbon bonds, in ketonic substances;kynureninase activity;pyridoxal phosphate binding;vitamin B6 binding;vitamin binding	cell part;cytoplasm;intracellular membrane-bounded organelle;intracellular organelle;intracellular part;membrane-bounded organelle;nucleus;organelle	amine metabolic process;biosynthetic process;catabolic process;cellular amino acid metabolic process;cellular aromatic compound metabolic process;cellular ketone metabolic process;cellular metabolic process;cellular nitrogen compound metabolic process;cellular process;cofactor metabolic process;heterocycle metabolic process;metabolic process;nitrogen compound metabolic process;nucleobase-containi…	1	16	16	16	49.4	49.4	49.4	51.031	453
Q04697	GSF2_YEAST	Glucose-signaling factor 2 (Extracellular mutant protein 6)	GSF2 ECM6 EFF2 YML048W YM9827.04	0.429393	-0.837281	-0.803874	1.21176	binding;protein binding;unfolded protein binding	cell part;cytoplasmic part;endoplasmic reticulum part;integral to endoplasmic reticulum membrane;integral to membrane;integral to organelle membrane;intracellular organelle part;intracellular part;intrinsic to endoplasmic reticulum membrane;intrinsic to membrane;intrinsic to organelle membrane;membrane part;organelle part	cellular localization;cellular metabolic process;cellular process;localization;macromolecule metabolic process;metabolic process;primary metabolic process;protein folding;protein metabolic process	1	19	19	19	42.9	42.9	42.9	45.869	403
P14904	AMPL_YEAST	Vacuolar aminopeptidase 1 (EC 3.4.11.22) (Aminopeptidase yscI) (Leucine aminopeptidase IV) (LAPIV) (Lysosomal aminopeptidase III) (Polypeptidase) (Vacuolar aminopeptidase I)	APE1 API LAP4 YSC1 YKL103C YKL455	0.160648	-0.474859	-1.00465	1.31886	aminopeptidase activity;binding;catalytic activity;cation binding;exopeptidase activity;hydrolase activity;identical protein binding;ion binding;metal ion binding;metalloaminopeptidase activity;metalloexopeptidase activity;metallopeptidase activity;peptidase activity;peptidase activity, acting on L-amino acid peptides;protein binding;transition metal ion binding;zinc ion binding	cell part;cytoplasmic part;fungal-type vacuole;intracellular membrane-bounded organelle;intracellular organelle;intracellular part;lytic vacuole;membrane-bounded organelle;organelle;storage vacuole;vacuole	catabolic process;cellular metabolic process;cellular process;establishment of localization;macromolecule metabolic process;metabolic process;primary metabolic process;protein catabolic process;protein metabolic process;protein transport;transport	1	24	24	24	54.3	54.3	54.3	57.092	514
P40582	GST1_YEAST	Glutathione S-transferase 1 (EC 2.5.1.18) (GST-I)	GTT1 YIR038C	0.154495	-0.478341	-0.99887	1.32272	antioxidant activity;catalytic activity;glutathione peroxidase activity;glutathione transferase activity;oxidoreductase activity;oxidoreductase activity, acting on peroxide as acceptor;peroxidase activity;transferase activity;transferase activity, transferring alkyl or aryl (other than methyl) groups	cell part;cytoplasmic part;endoplasmic reticulum;endoplasmic reticulum membrane;endoplasmic reticulum part;intracellular membrane-bounded organelle;intracellular organelle;intracellular organelle part;intracellular part;membrane;membrane part;membrane-bounded organelle;organelle;organelle membrane;organelle part	amine metabolic process;cellular amino acid metabolic process;cellular ketone metabolic process;cellular metabolic process;cellular nitrogen compound metabolic process;cellular process;metabolic process;nitrogen compound metabolic process;organic acid metabolic process;peptide metabolic process;primary metabolic process;small molecule metabolic process;sulfur compound metabolic process	1	15	15	15	52.1	52.1	52.1	26.794	234
P32598	PP12_YEAST	Serine/threonine-protein phosphatase PP1-2 (EC 3.1.3.16)	GLC7 CID1 DIS2 YER133W	0.151683	-0.318495	-1.11276	1.27957	binding;catalytic activity;cation binding;hydrolase activity;hydrolase activity, acting on ester bonds;ion binding;metal ion binding;phosphatase activity;phosphoprotein phosphatase activity;phosphoric ester hydrolase activity;protein serine/threonine phosphatase activity	cell part;cell projection part;cellular bud neck;chromosomal part;condensed chromosome kinetochore;condensed nuclear chromosome kinetochore;cytoplasmic part;cytoskeletal part;intracellular membrane-bounded organelle;intracellular non-membrane-bounded organelle;intracellular organelle;intracellular organelle part;intracellular part;kinetochore;macromolecular complex;mating projection base;membrane…	anatomical structure development;anatomical structure formation involved in morphogenesis;ascospore formation;biological regulation;biosynthetic process;carbohydrate metabolic process;cell budding;cell development;cell differentiation;cell division;cellular component organization;cellular homeostasis;cellular ion homeostasis;cellular localization;cellular metabolic process;cellular nitrogen compo…	1	18	18	18	71.2	71.2	71.2	35.907	312
P38773	DOG2_YEAST	2-deoxyglucose-6-phosphate phosphatase 2 (2-DOG-6-P 2) (2-deoxyglucose-6-phosphatase 2) (EC 3.1.3.68)	DOG2 YHR043C	0.993617	-0.234449	-1.29326	0.534088	2-deoxyglucose-6-phosphatase activity;binding;carbohydrate phosphatase activity;catalytic activity;cation binding;hydrolase activity;hydrolase activity, acting on ester bonds;ion binding;metal ion binding;phosphatase activity;phosphoric ester hydrolase activity;sugar-phosphatase activity		alcohol metabolic process;carbohydrate metabolic process;cellular metabolic process;cellular process;metabolic process;phosphorus metabolic process;primary metabolic process;small molecule metabolic process	1	10	10	10	54.9	54.9	54.9	27.165	246
P12612	TCPA_YEAST	T-complex protein 1 subunit alpha (TCP-1-alpha) (CCT-alpha)	TCP1 CCT1 YDR212W YD8142.13 YD8142B.04	0.586575	-0.38508	-1.21595	1.01445	adenyl nucleotide binding;adenyl ribonucleotide binding;ATP binding;binding;nucleotide binding;protein binding;purine nucleotide binding;purine ribonucleoside triphosphate binding;purine ribonucleotide binding;ribonucleotide binding;unfolded protein binding	cell part;chaperonin-containing T-complex;cytoplasmic part;cytosolic part;intracellular part;macromolecular complex;protein complex	cellular metabolic process;cellular process;macromolecule metabolic process;metabolic process;primary metabolic process;protein folding;protein metabolic process	1	33	33	33	75.5	75.5	75.5	60.48	559
P38071	ETR1_YEAST	Enoyl-[acyl-carrier-protein] reductase, mitochondrial (EC 1.3.1.104) (2-enoyl thioester reductase) (Mitochondrial respiratory function protein 1)	ETR1 MRF1 MRF1' YBR026C YBR0310	0.78778	-0.22889	-1.32128	0.762389	binding;catalytic activity;cation binding;DNA binding;enoyl-[acyl-carrier-protein] reductase (NADPH, B-specific) activity;enoyl-[acyl-carrier-protein] reductase activity;fatty acid synthase activity;ion binding;metal ion binding;nucleic acid binding;oxidoreductase activity;oxidoreductase activity, acting on the CH-CH group of donors;oxidoreductase activity, acting on the CH-CH group of donors, NA…	cell part;cytoplasmic part;intracellular membrane-bounded organelle;intracellular organelle;intracellular organelle lumen;intracellular organelle part;intracellular part;membrane-bounded organelle;membrane-enclosed lumen;mitochondrial matrix;mitochondrial part;mitochondrion;organelle;organelle lumen;organelle part	biosynthetic process;cellular ketone metabolic process;cellular lipid metabolic process;cellular metabolic process;cellular process;cellular respiration;generation of precursor metabolites and energy;lipid metabolic process;metabolic process;organic acid metabolic process;primary metabolic process;small molecule metabolic process	1	20	20	20	64.5	64.5	64.5	42.066	380
P13517	CAPZB_YEAST	F-actin-capping protein subunit beta	CAP2 YIL034C	0.864583	-0.340457	-1.26187	0.737745	actin binding;actin filament binding;binding;cytoskeletal protein binding;protein binding	actin cortical patch;actin filament;cell cortex part;cell part;cellular bud tip;cytoplasmic part;cytoskeletal part;F-actin capping protein complex;intracellular organelle part;intracellular part;macromolecular complex;organelle part;protein complex;site of polarized growth	biological regulation;cellular component organization;cellular process;cytoskeleton organization;filamentous growth;growth;organelle organization;regulation of organelle organization	1	14	14	14	57.1	57.1	57.1	32.629	287
P53723	YN8B_YEAST	UPF0674 endoplasmic reticulum membrane protein YNR021W	YNR021W N3216	0.644249	-0.162734	-1.34587	0.864352		cell part;cytoplasmic part;endoplasmic reticulum membrane;endoplasmic reticulum part;integral to membrane;intracellular organelle part;intracellular part;intrinsic to membrane;membrane;membrane part;organelle membrane;organelle part		1	8	8	8	25.2	25.2	25.2	47.093	404
P38912	IF1A_YEAST	Eukaryotic translation initiation factor 1A (eIF-1A) (Eukaryotic translation initiation factor 4C) (eIF-4C)	TIF11 YMR260C YM8156.02C	0.552619	-0.354827	-1.22787	1.03008	binding;double-stranded RNA binding;nucleic acid binding;protein binding;ribonucleoprotein binding;ribosomal small subunit binding;RNA binding;translation factor activity, nucleic acid binding;translation initiation factor activity;translation initiation factor binding	cell part;cytoplasmic part;eukaryotic 43S preinitiation complex;eukaryotic 48S preinitiation complex;intracellular part;macromolecular complex;ribonucleoprotein complex;translation preinitiation complex	cellular component assembly;cellular component organization;cellular macromolecular complex assembly;cellular process;macromolecular complex assembly;ribonucleoprotein complex assembly	1	10	10	10	51.6	51.6	51.6	17.435	153
P53228	TAL2_YEAST	Transaldolase NQM1 (EC 2.2.1.2) (Non-quiescent mutant protein 1)	NQM1 YGR043C	1.12804	-0.680898	-0.986438	0.53929	catalytic activity;sedoheptulose-7-phosphate:D-glyceraldehyde-3-phosphate glyceronetransferase activity;transferase activity;transferase activity, transferring aldehyde or ketonic groups	cell part;cytoplasm;intracellular part	alcohol metabolic process;carbohydrate metabolic process;catabolic process;cellular metabolic process;cellular nitrogen compound metabolic process;cellular process;cofactor metabolic process;heterocycle metabolic process;metabolic process;nitrogen compound metabolic process;nucleobase-containing compound metabolic process;nucleobase-containing small molecule metabolic process;nucleotide metabolic…	1	27	26	26	67	64.6	64.6	37.253	333
Q12329	HSP42_YEAST	Heat shock protein 42 (42 kDa heat shock protein)	HSP42 YDR171W YD9395.04	0.956228	-0.786265	-0.937323	0.76736	binding;protein binding;unfolded protein binding	cell part;cytoskeleton;intracellular non-membrane-bounded organelle;intracellular organelle;intracellular part;non-membrane-bounded organelle;organelle	cellular component organization;cellular process;cytoskeleton organization;organelle organization	1	14	14	14	57.9	57.9	57.9	42.816	375
P52553	PFD6_YEAST	Prefoldin subunit 6 (Genes involved in microtubule biogenesis protein 1) (Gim complex subunit 1) (GimC subunit 1)	YKE2 GIM1 PFD6 YLR200W L8167.8	1.10466	-0.957776	-0.725978	0.579096	binding;cytoskeletal protein binding;protein binding;tubulin binding	cell part;cytoplasm;cytoplasmic part;cytosolic part;intracellular membrane-bounded organelle;intracellular organelle;intracellular part;macromolecular complex;membrane-bounded organelle;nucleus;organelle;prefoldin complex;protein complex	biological regulation;cellular component assembly;cellular component organization;cellular macromolecular complex assembly;cellular metabolic process;cellular process;macromolecular complex assembly;macromolecule metabolic process;metabolic process;primary metabolic process;protein complex assembly;protein folding;protein metabolic process	1	7	7	7	71.1	71.1	71.1	13.284	114
P05318	RLA1_YEAST	60S acidic ribosomal protein P1-alpha (A1) (L12eIIA) (Large ribosomal subunit protein P1-A) (P1A) (YP1alpha)	RPP1A L12EIIA RPA1 RPLA1 YDL081C	1.21711	-0.931684	-0.694927	0.409506	enzyme activator activity;enzyme regulator activity;kinase activator activity;kinase regulator activity;protein kinase activator activity;protein kinase regulator activity;structural constituent of ribosome;structural molecule activity	cell part;cytosolic large ribosomal subunit;intracellular organelle part;intracellular part;large ribosomal subunit;macromolecular complex;organelle part;ribonucleoprotein complex	biological regulation;biosynthetic process;cellular metabolic process;cellular process;cytoplasmic translation;macromolecule metabolic process;metabolic process;primary metabolic process;protein metabolic process;regulation of protein modification process;translation;translational elongation	1	3	3	3	50.9	50.9	50.9	10.908	106
Q12402	YOP1_YEAST	Protein YOP1 (YIP1 partner protein 1) (YPT-interacting protein 2)	YOP1 YIP2 YPR028W YP9367.08	1.03216	-0.856168	-0.858104	0.68211		cell part;cytoplasmic part;endoplasmic reticulum;endoplasmic reticulum membrane;endoplasmic reticulum part;endoplasmic reticulum tubular network;Golgi apparatus part;Golgi membrane;integral to membrane;intracellular membrane-bounded organelle;intracellular organelle;intracellular organelle part;intracellular part;intrinsic to membrane;membrane;membrane part;membrane-bounded organelle;organelle;or…	cellular component assembly;cellular component organization;cellular macromolecular complex assembly;cellular process;endoplasmic reticulum organization;establishment of localization;macromolecular complex assembly;nucleus organization;organelle inheritance;organelle organization;protein complex assembly;transport;vesicle-mediated transport	1	6	6	6	32.8	32.8	32.8	20.269	180
P38116	ARL1_YEAST	ADP-ribosylation factor-like protein 1 (Arf-like GTPase 1)	ARL1 ARF3 YBR164C YBR1216	0.813925	-0.949754	-0.776558	0.912387	binding;catalytic activity;GTP binding;GTPase activity;guanyl nucleotide binding;guanyl ribonucleotide binding;hydrolase activity;hydrolase activity, acting on acid anhydrides;hydrolase activity, acting on acid anhydrides, in phosphorus-containing anhydrides;nucleoside-triphosphatase activity;nucleotide binding;purine nucleotide binding;purine ribonucleoside triphosphate binding;purine ribonucleo…	cell part;cytoplasmic part;cytosol;Golgi apparatus;Golgi apparatus part;intracellular membrane-bounded organelle;intracellular organelle;intracellular organelle part;intracellular part;membrane-bounded organelle;organelle;organelle part;trans-Golgi network	biological regulation;cellular component organization;cellular membrane organization;cellular process;endocytosis;establishment of localization;Golgi vesicle transport;membrane invagination;membrane organization;metabolic process;protein targeting;protein transport;response to stimulus;signal transduction;transport;vacuolar transport;vesicle-mediated transport	1	7	7	7	54.6	54.6	54.6	20.434	183
P53250	TWF1_YEAST	Twinfilin-1 (Twinfilin-A)	TWF1 YGR080W	0.864725	0.438319	-1.42971	0.126669	actin binding;actin filament binding;actin monomer binding;binding;cytoskeletal protein binding;protein binding	actin cortical patch;cell cortex part;cell part;cytoplasmic part;cytoskeletal part;intracellular organelle part;intracellular part;organelle part	biological regulation;cellular component disassembly;cellular component organization;cellular process;cytoskeleton organization;organelle organization;protein depolymerization;regulation of organelle organization	2	15	15	15	68.7	68.7	68.7	37.07	332
P09435	HSP73_YEAST	Heat shock protein SSA3	SSA3 YBL075C YBL06.07 YBL0610	1.04805	0.22994	-1.35736	0.0793724	adenyl nucleotide binding;adenyl ribonucleotide binding;ATP binding;ATPase activity;binding;catalytic activity;hydrolase activity;hydrolase activity, acting on acid anhydrides;hydrolase activity, acting on acid anhydrides, in phosphorus-containing anhydrides;nucleoside-triphosphatase activity;nucleotide binding;protein binding;purine nucleotide binding;purine ribonucleoside triphosphate binding;p…	cell part;cytoplasmic part;cytosol;intracellular part	cellular metabolic process;cellular process;establishment of localization;macromolecule metabolic process;metabolic process;primary metabolic process;protein folding;protein metabolic process;protein transport;proteolysis;proteolysis involved in cellular protein catabolic process;transmembrane transport;transport	2	53	26	26	72.6	49	49	70.546	649
P41939	IDHC_YEAST	Isocitrate dehydrogenase [NADP] cytoplasmic (IDH) (EC 1.1.1.42) (IDP) (NADP(+)-specific ICDH) (Oxalosuccinate decarboxylase)	IDP2 YLR174W L9470.12	0.986016	0.341224	-1.38145	0.0542075	binding;catalytic activity;cation binding;coenzyme binding;cofactor binding;ion binding;isocitrate dehydrogenase (NADP+) activity;isocitrate dehydrogenase activity;magnesium ion binding;metal ion binding;NAD binding;nucleotide binding;oxidoreductase activity;oxidoreductase activity, acting on CH-OH group of donors;oxidoreductase activity, acting on the CH-OH group of donors, NAD or NADP as accept…	cell part;cytoplasmic part;cytosol;intracellular part	carbohydrate metabolic process;catabolic process;cellular aldehyde metabolic process;cellular ketone metabolic process;cellular metabolic process;cellular process;cofactor metabolic process;metabolic process;organic acid metabolic process;primary metabolic process;small molecule metabolic process	2	32	29	28	81.1	77.9	75.2	46.562	412
P53312	SUCB_YEAST	Succinate--CoA ligase [ADP-forming] subunit beta, mitochondrial (EC 6.2.1.5) (Succinyl-CoA synthetase beta chain) (SCS-beta)	LSC2 YGR244C G8625	0.918605	0.518447	-1.37229	-0.0647617	acid-thiol ligase activity;adenyl nucleotide binding;adenyl ribonucleotide binding;ATP binding;binding;catalytic activity;CoA-ligase activity;ligase activity;ligase activity, forming carbon-sulfur bonds;nucleotide binding;purine nucleotide binding;purine ribonucleoside triphosphate binding;purine ribonucleotide binding;ribonucleotide binding;succinate-CoA ligase (ADP-forming) activity;succinate-C…	cell part;cytoplasmic part;intracellular membrane-bounded organelle;intracellular organelle;intracellular part;membrane-bounded organelle;mitochondrion;organelle	catabolic process;cellular metabolic process;cellular process;cofactor metabolic process;metabolic process	2	28	28	28	72.6	72.6	72.6	46.9	427
P14306	CPYI_YEAST	Carboxypeptidase Y inhibitor (CPY inhibitor) (CDC25 suppressor 1) (I(C)) (Ic) (Protein DKA1) (Protein NSP1)	TFS1 DKA1 NSP1 YLR178C L9470.19	0.937199	0.415326	-1.39546	0.042939	binding;endopeptidase inhibitor activity;endopeptidase regulator activity;enzyme inhibitor activity;enzyme regulator activity;lipid binding;peptidase inhibitor activity;peptidase regulator activity;phospholipid binding;serine-type endopeptidase inhibitor activity	cell part;cytoplasm;cytoplasmic part;fungal-type vacuole lumen;fungal-type vacuole membrane;intracellular organelle lumen;intracellular organelle part;intracellular part;membrane;membrane-enclosed lumen;organelle lumen;organelle membrane;organelle part;vacuolar lumen;vacuolar membrane;vacuolar part	biological regulation	2	14	14	14	86.8	86.8	86.8	24.357	219
P23724	PSB6_YEAST	Proteasome subunit beta type-6 (EC 3.4.25.1) (Multicatalytic endopeptidase complex subunit C5) (Proteasome component C5)	PRE7 PRS3 PTS1 YBL041W YBL0407	0.936556	0.434047	-1.39071	0.0201016	catalytic activity;endopeptidase activity;hydrolase activity;peptidase activity;peptidase activity, acting on L-amino acid peptides;threonine-type endopeptidase activity;threonine-type peptidase activity	cell part;cytoplasmic part;cytosolic part;cytosolic proteasome complex;endoplasmic reticulum membrane;endoplasmic reticulum part;intracellular membrane-bounded organelle;intracellular organelle;intracellular organelle part;intracellular part;macromolecular complex;membrane;membrane part;membrane-bounded organelle;nucleus;organelle;organelle membrane;organelle part;proteasome complex;proteasome co…	catabolic process;cellular metabolic process;cellular process;macromolecule metabolic process;metabolic process;primary metabolic process;protein metabolic process;proteolysis;proteolysis involved in cellular protein catabolic process	2	16	16	16	68.5	68.5	68.5	26.871	241
Q03940	RUVB1_YEAST	RuvB-like protein 1 (RUVBL1) (EC 3.6.4.12) (TIP49-homology protein 1) (TIP49a homolog)	RVB1 TIH1 TIP49A YDR190C	0.867653	0.324443	-1.44203	0.249933	5'-3' DNA helicase activity;adenyl nucleotide binding;adenyl ribonucleotide binding;ATP binding;ATPase activity;ATPase activity, coupled;ATP-dependent 5'-3' DNA helicase activity;ATP-dependent DNA helicase activity;ATP-dependent helicase activity;binding;catalytic activity;DNA helicase activity;DNA-dependent ATPase activity;helicase activity;hydrolase activity;hydrolase activity, acting on acid a…	cell part;chromatin remodeling complex;chromosomal part;DNA helicase complex;Ino80 complex;intracellular membrane-bounded organelle;intracellular organelle;intracellular organelle part;intracellular part;macromolecular complex;membrane-bounded organelle;nuclear chromosome part;nuclear part;nucleus;organelle;organelle part;protein complex;Swr1 complex	biological regulation;biosynthetic process;cellular component assembly;cellular component organization;cellular macromolecular complex assembly;cellular metabolic process;cellular nitrogen compound metabolic process;cellular process;chromatin modification;chromatin organization;chromosome organization;DNA geometric change;DNA metabolic process;DNA repair;macromolecular complex assembly;macromolec…	2	30	30	30	68.3	68.3	68.3	50.452	463
P47039	BNA3_YEAST	Probable kynurenine--oxoglutarate transaminase BNA3 (EC 2.6.1.7) (Biosynthesis of nicotinic acid protein 3) (Kynurenine aminotransferase)	BNA3 YJL060W J1138	0.891673	0.305035	-1.43376	0.237055	2-aminoadipate transaminase activity;binding;catalytic activity;cofactor binding;kynurenine-oxoglutarate transaminase activity;pyridoxal phosphate binding;transaminase activity;transferase activity;transferase activity, transferring nitrogenous groups;vitamin B6 binding;vitamin binding	cell part;cytoplasm;cytoplasmic part;intracellular membrane-bounded organelle;intracellular organelle;intracellular part;membrane-bounded organelle;mitochondrion;organelle	amine metabolic process;biosynthetic process;cellular amino acid metabolic process;cellular ketone metabolic process;cellular metabolic process;cellular nitrogen compound metabolic process;cellular process;heterocycle metabolic process;metabolic process;nitrogen compound metabolic process;organic acid metabolic process;primary metabolic process;small molecule metabolic process	2	20	20	20	49.3	49.3	49.3	50.082	444
P38077	ATPG_YEAST	ATP synthase subunit gamma, mitochondrial (F-ATPase gamma subunit)	ATP3 ATP3a ATP3b YBR039W YBR0408	0.877107	0.314334	-1.43896	0.247521	active transmembrane transporter activity;ATPase activity;ATPase activity, coupled;ATPase activity, coupled to movement of substances;ATPase activity, coupled to transmembrane movement of ions;ATPase activity, coupled to transmembrane movement of substances;catalytic activity;cation transmembrane transporter activity;cation-transporting ATPase activity;hydrogen ion transmembrane transporter activ…	cell part;cytoplasmic part;intracellular organelle part;intracellular part;macromolecular complex;membrane part;mitochondrial membrane part;mitochondrial part;mitochondrial proton-transporting ATP synthase, central stalk;organelle part;protein complex;proton-transporting ATP synthase, central stalk	biosynthetic process;cellular metabolic process;cellular nitrogen compound metabolic process;cellular process;establishment of localization;heterocycle metabolic process;hydrogen transport;ion transport;metabolic process;nitrogen compound metabolic process;nucleobase-containing compound metabolic process;nucleobase-containing small molecule metabolic process;nucleotide metabolic process;primary m…	2	23	23	23	67.8	67.8	67.8	34.35	311
P16603	NCPR_YEAST	NADPH--cytochrome P450 reductase (CPR) (P450R) (EC 1.6.2.4)	NCP1 CPR1 NCPR1 PRD1 YHR042W	0.766673	0.437916	-1.46685	0.262264	binding;catalytic activity;cation binding;coenzyme binding;cofactor binding;electron carrier activity;FMN binding;ion binding;iron ion binding;metal ion binding;NADPH-hemoprotein reductase activity;nucleotide binding;oxidoreductase activity;oxidoreductase activity, acting on NADH or NADPH;oxidoreductase activity, acting on NADH or NADPH, heme protein as acceptor;transition metal ion binding	cell part;cytoplasmic part;endoplasmic reticulum membrane;endoplasmic reticulum part;integral to membrane;intracellular organelle part;intracellular part;intrinsic to membrane;membrane;membrane part;mitochondrial membrane;mitochondrial outer membrane;mitochondrial part;organelle membrane;organelle outer membrane;organelle part;outer membrane;plasma membrane	alcohol metabolic process;biosynthetic process;cellular metabolic process;cellular process;lipid metabolic process;metabolic process;primary metabolic process;small molecule metabolic process	2	32	32	32	66.3	66.3	66.3	76.771	691
P54783	ALO_YEAST	D-arabinono-1,4-lactone oxidase (ALO) (EC 1.1.3.37) (L-galactono-gamma-lactone oxidase)	ALO1 YML086C	0.776844	0.347755	-1.46873	0.344127	binding;catalytic activity;coenzyme binding;cofactor binding;D-arabinono-1,4-lactone oxidase activity;flavin adenine dinucleotide binding;oxidoreductase activity;oxidoreductase activity, acting on CH-OH group of donors;oxidoreductase activity, acting on the CH-OH group of donors, NAD or NADP as acceptor;oxidoreductase activity, acting on the CH-OH group of donors, oxygen as acceptor;UDP-N-acetylm…	cell part;cytoplasmic part;integral to membrane;integral to mitochondrial membrane;integral to mitochondrial outer membrane;integral to organelle membrane;intracellular membrane-bounded organelle;intracellular organelle;intracellular organelle part;intracellular part;intrinsic to membrane;intrinsic to mitochondrial outer membrane;intrinsic to organelle membrane;membrane part;membrane-bounded orga…	biosynthetic process;cellular metabolic process;cellular process;heterocycle metabolic process;metabolic process;response to chemical stimulus;response to oxidative stress;response to stimulus;response to stress	2	23	23	23	47.9	47.9	47.9	59.493	526
Q06252	YL179_YEAST	Uncharacterized protein YLR179C	YLR179C L9470.20	0.805919	0.1663	-1.44794	0.475721		cell part;cytoplasm;intracellular part		2	15	15	15	82.6	82.6	82.6	22.151	201
Q06385	VPS74_YEAST	Vacuolar protein sorting-associated protein 74	VPS74 YDR372C D9481.15	0.705145	0.399023	-1.4832	0.379033	binding;enzyme binding;lipid binding;phosphatidylinositol binding;phosphatidylinositol-4-phosphate binding;phospholipid binding;protein binding	cell part;cytoplasmic part;cytosol;extrinsic to membrane;Golgi apparatus;Golgi apparatus part;Golgi cisterna;Golgi cisterna membrane;Golgi medial cisterna;Golgi membrane;intracellular membrane-bounded organelle;intracellular organelle;intracellular organelle part;intracellular part;membrane;membrane part;membrane-bounded organelle;organelle;organelle membrane;organelle part;organelle subcompartme…	biological regulation;carbohydrate metabolic process;cellular localization;cellular metabolic process;cellular process;establishment of localization;Golgi vesicle transport;localization;macromolecule metabolic process;macromolecule modification;metabolic process;primary metabolic process;protein glycosylation;protein metabolic process;protein modification process;protein transport;response to che…	2	17	17	17	62	62	62	39.286	345
P0CX11	ERR2_YEAST	Enolase-related protein 2 (EC 4.2.1.11) (2-phospho-D-glycerate hydro-lyase) (2-phosphoglycerate dehydratase)	ERR2 YPL281C	0.517085	0.484317	-1.49987	0.498463	binding;carbon-oxygen lyase activity;catalytic activity;cation binding;hydro-lyase activity;ion binding;lyase activity;magnesium ion binding;metal ion binding;phosphopyruvate hydratase activity	cell part;cytoplasmic part;cytosolic part;intracellular part;macromolecular complex;phosphopyruvate hydratase complex;protein complex	alcohol metabolic process;carbohydrate metabolic process;catabolic process;cellular metabolic process;cellular process;generation of precursor metabolites and energy;metabolic process;primary metabolic process;small molecule metabolic process	2	17	17	1	60.6	60.6	2.1	47.327	437
P04806	HXKA_YEAST	Hexokinase-1 (EC 2.7.1.1) (Hexokinase PI) (Hexokinase-A)	HXK1 HKA YFR053C	0.381738	0.605313	-1.49371	0.506659	adenyl nucleotide binding;adenyl ribonucleotide binding;ATP binding;binding;carbohydrate kinase activity;catalytic activity;hexokinase activity;kinase activity;nucleotide binding;phosphotransferase activity, alcohol group as acceptor;purine nucleotide binding;purine ribonucleoside triphosphate binding;purine ribonucleotide binding;ribonucleotide binding;transferase activity;transferase activity, …	cell part;cytoplasm;cytoplasmic part;intracellular membrane-bounded organelle;intracellular organelle;intracellular part;membrane-bounded organelle;mitochondrion;organelle	alcohol metabolic process;carbohydrate metabolic process;carbohydrate transport;catabolic process;cellular metabolic process;cellular process;establishment of localization;generation of precursor metabolites and energy;metabolic process;phosphorus metabolic process;primary metabolic process;small molecule metabolic process;transport	2	48	48	45	92	92	90.1	53.738	485
Q05911	PUR8_YEAST	Adenylosuccinate lyase (ASL) (EC 4.3.2.2) (Adenylosuccinase) (ASase)	ADE13 YLR359W L8039.12	0.321122	0.688522	-1.48286	0.473218	(S)-2-(5-amino-1-(5-phospho-D-ribosyl)imidazole-4-carboxamido)succinate AMP-lyase (fumarate-forming) activity;amidine-lyase activity;carbon-nitrogen lyase activity;catalytic activity;lyase activity;N6-(1,2-dicarboxyethyl)AMP AMP-lyase (fumarate-forming) activity		biosynthetic process;cellular metabolic process;cellular nitrogen compound metabolic process;cellular process;heterocycle metabolic process;metabolic process;nitrogen compound metabolic process;nucleobase-containing compound metabolic process;nucleobase-containing small molecule metabolic process;nucleotide metabolic process;primary metabolic process;small molecule metabolic process	2	30	30	30	56.4	56.4	56.4	54.51	482
P38998	LYS1_YEAST	Saccharopine dehydrogenase [NAD(+), L-lysine-forming] (SDH) (EC 1.5.1.7) (Lysine--2-oxoglutarate reductase)	LYS1 YIR034C	0.524349	0.594793	-1.49366	0.374516	binding;catalytic activity;mRNA binding;nucleic acid binding;oxidoreductase activity;oxidoreductase activity, acting on the CH-NH group of donors;oxidoreductase activity, acting on the CH-NH group of donors, NAD or NADP as acceptor;RNA binding;saccharopine dehydrogenase (NAD+, L-lysine-forming) activity;saccharopine dehydrogenase activity	cell part;cytoplasm;intracellular part	amine metabolic process;biosynthetic process;cellular amino acid metabolic process;cellular ketone metabolic process;cellular metabolic process;cellular nitrogen compound metabolic process;cellular process;metabolic process;nitrogen compound metabolic process;organic acid metabolic process;primary metabolic process;small molecule metabolic process	2	23	23	23	66.8	66.8	66.8	41.464	373
P32381	ARP2_YEAST	Actin-related protein 2 (Actin-like protein ARP2) (Actin-like protein 2)	ARP2 ACT2 YDL029W D2778	0.282861	0.719754	-1.47581	0.473199	adenyl nucleotide binding;adenyl ribonucleotide binding;ATP binding;ATPase activity;binding;catalytic activity;hydrolase activity;hydrolase activity, acting on acid anhydrides;hydrolase activity, acting on acid anhydrides, in phosphorus-containing anhydrides;nucleoside-triphosphatase activity;nucleotide binding;purine nucleotide binding;purine ribonucleoside triphosphate binding;purine ribonucleo…	actin cortical patch;Arp2/3 protein complex;cell cortex part;cell part;cytoplasmic part;cytoskeletal part;intracellular membrane-bounded organelle;intracellular organelle;intracellular organelle part;intracellular part;macromolecular complex;membrane-bounded organelle;mitochondrion;organelle;organelle part;protein complex	anatomical structure formation involved in morphogenesis;biological regulation;cell wall organization;cell wall organization or biogenesis;cellular cell wall organization;cellular cell wall organization or biogenesis;cellular component assembly;cellular component organization;cellular localization;cellular process;cytoskeleton organization;developmental process;establishment of localization;exter…	2	20	20	20	58.3	58.3	58.3	44.073	391
P13298	PYRE_YEAST	Orotate phosphoribosyltransferase 1 (OPRT 1) (OPRTase 1) (EC 2.4.2.10)	URA5 PYR5 YML106W YM8339.13	0.55584	0.552894	-1.4953	0.386565	catalytic activity;orotate phosphoribosyltransferase activity;transferase activity;transferase activity, transferring glycosyl groups;transferase activity, transferring pentosyl groups		biosynthetic process;cellular aromatic compound metabolic process;cellular metabolic process;cellular nitrogen compound metabolic process;cellular process;heterocycle metabolic process;metabolic process;nitrogen compound metabolic process;nucleobase-containing compound metabolic process;nucleobase-containing small molecule metabolic process;nucleoside metabolic process;nucleotide metabolic proces…	2	16	16	14	61.9	61.9	52.7	24.664	226
P25362	PET18_YEAST	Protein PET18	PET18 HIT2 YCR020C YCR20C	0.219345	0.636551	-1.47208	0.616181		cell part;cytoplasmic part;cytosol;intracellular part	cellular aromatic compound metabolic process;cellular metabolic process;cellular process;heterocycle metabolic process;metabolic process;nitrogen compound metabolic process;small molecule metabolic process;sulfur compound metabolic process;vitamin metabolic process	2	11	11	11	64.2	64.2	64.2	25.223	215
P05740	RL17A_YEAST	60S ribosomal protein L17-A (L20A) (Large ribosomal subunit protein uL22-A) (YL17)	RPL17A RPL17 RPL20A YKL180W	0.319407	0.7446	-1.47474	0.41073	structural constituent of ribosome;structural molecule activity	cell part;cytosolic large ribosomal subunit;intracellular organelle part;intracellular part;large ribosomal subunit;macromolecular complex;organelle part;ribonucleoprotein complex	biosynthetic process;cellular metabolic process;cellular process;cytoplasmic translation;macromolecule metabolic process;metabolic process;primary metabolic process;protein metabolic process;translation	2	12	12	1	54.3	54.3	5.4	20.549	184
P38249	EIF3A_YEAST	Eukaryotic translation initiation factor 3 subunit A (eIF3a) (Eukaryotic translation initiation factor 3 110 kDa subunit homolog) (eIF3 p110) (Translation initiation factor eIF3, p110 subunit homolog)	RPG1 TIF32 YBR079C YBR0734	0.468496	0.783196	-1.45764	0.205943	binding;nucleic acid binding;RNA binding;translation factor activity, nucleic acid binding;translation initiation factor activity	cell part;cytoplasmic part;eukaryotic 43S preinitiation complex;eukaryotic 48S preinitiation complex;eukaryotic translation initiation factor 3 complex;incipient cellular bud site;intracellular non-membrane-bounded organelle;intracellular organelle;intracellular part;macromolecular complex;multi-eIF complex;non-membrane-bounded organelle;organelle;protein complex;ribonucleoprotein complex;RNA gra…	biological regulation;cellular component assembly;cellular component organization;cellular macromolecular complex assembly;cellular process;macromolecular complex assembly;regulation of translation;ribonucleoprotein complex assembly;translational initiation	2	61	61	61	60.2	60.2	60.2	110.34	964
P10659	METK1_YEAST	S-adenosylmethionine synthase 1 (AdoMet synthase 1) (EC 2.5.1.6) (Methionine adenosyltransferase 1) (MAT 1)	SAM1 ETH10 YLR180W L9470.9	0.668581	0.615985	-1.46341	0.178846	adenyl nucleotide binding;adenyl ribonucleotide binding;ATP binding;binding;catalytic activity;cation binding;ion binding;metal ion binding;methionine adenosyltransferase activity;nucleotide binding;purine nucleotide binding;purine ribonucleoside triphosphate binding;purine ribonucleotide binding;ribonucleotide binding;transferase activity;transferase activity, transferring alkyl or aryl (other t…		amine metabolic process;biosynthetic process;cellular amino acid metabolic process;cellular ketone metabolic process;cellular metabolic process;cellular nitrogen compound metabolic process;cellular process;cofactor metabolic process;heterocycle metabolic process;metabolic process;nitrogen compound metabolic process;nucleobase-containing compound metabolic process;nucleobase-containing small molec…	2	35	15	15	86.4	52.1	52.1	41.818	382
P07275	PUT2_YEAST	Delta-1-pyrroline-5-carboxylate dehydrogenase, mitochondrial (P5C dehydrogenase) (EC 1.2.1.88) (L-glutamate gamma-semialdehyde dehydrogenase)	PUT2 YHR037W	0.683321	0.607785	-1.46109	0.16998	1-pyrroline-5-carboxylate dehydrogenase activity;catalytic activity;oxidoreductase activity;oxidoreductase activity, acting on the aldehyde or oxo group of donors;oxidoreductase activity, acting on the aldehyde or oxo group of donors, NAD or NADP as acceptor;oxidoreductase activity, acting on the CH-NH group of donors;oxidoreductase activity, acting on the CH-NH group of donors, NAD or NADP as ac…	cell part;cytoplasmic part;intracellular organelle lumen;intracellular organelle part;intracellular part;membrane;membrane-enclosed lumen;mitochondrial inner membrane;mitochondrial matrix;mitochondrial membrane;mitochondrial part;organelle inner membrane;organelle lumen;organelle membrane;organelle part	amine metabolic process;biosynthetic process;catabolic process;cellular amino acid metabolic process;cellular ketone metabolic process;cellular metabolic process;cellular nitrogen compound metabolic process;cellular process;heterocycle metabolic process;metabolic process;nitrogen compound metabolic process;organic acid metabolic process;primary metabolic process;small molecule metabolic process	2	28	28	28	52	52	52	64.434	575
P46672	ARC1_YEAST	tRNA-aminoacylation cofactor ARC1 (Acyl-RNA-complex protein 1) (GU4 nucleic-binding protein 1) (G4p1 protein) (P42) (tRNA-interacting factor ARC1)	ARC1 G4P1 YGL105W G3085	0.572113	0.721215	-1.45789	0.164566	binding;enzyme activator activity;enzyme regulator activity;lipid binding;nucleic acid binding;phosphatidylinositol binding;phosphatidylinositol-3,5-bisphosphate binding;phosphatidylinositol-3-phosphate binding;phospholipid binding;RNA binding;tRNA binding	cell part;cytoplasm;cytoplasmic part;intracellular part;macromolecular complex;methionyl glutamyl tRNA synthetase complex;protein complex	amine metabolic process;biological regulation;cellular amino acid metabolic process;cellular ketone metabolic process;cellular metabolic process;cellular nitrogen compound metabolic process;cellular process;macromolecule metabolic process;metabolic process;nitrogen compound metabolic process;nucleobase-containing compound metabolic process;organic acid metabolic process;primary metabolic process;…	2	24	24	24	74.7	74.7	74.7	42.083	376
Q04947	RTN1_YEAST	Reticulon-like protein 1	RTN1 YDR233C	0.38793	0.782843	-1.4661	0.295327		cell cortex part;cell part;cortical endoplasmic reticulum;cytoplasmic part;endoplasmic reticulum;endoplasmic reticulum part;endoplasmic reticulum tubular network;Golgi apparatus;integral to cytosolic side of endoplasmic reticulum membrane;integral to endoplasmic reticulum membrane;integral to membrane;integral to organelle membrane;intracellular membrane-bounded organelle;intracellular organelle;…	cellular component assembly;cellular component organization;cellular macromolecular complex assembly;cellular process;endoplasmic reticulum organization;macromolecular complex assembly;nucleus organization;organelle organization;protein complex assembly	2	19	19	19	66.8	66.8	66.8	32.916	295
P22133	MDHC_YEAST	Malate dehydrogenase, cytoplasmic (EC 1.1.1.37)	MDH2 YOL126C	0.570321	0.687435	-1.46888	0.21112	catalytic activity;L-malate dehydrogenase activity;malate dehydrogenase activity;oxidoreductase activity;oxidoreductase activity, acting on CH-OH group of donors;oxidoreductase activity, acting on the CH-OH group of donors, NAD or NADP as acceptor	cell part;cytoplasmic part;cytosol;intracellular part	alcohol metabolic process;biosynthetic process;carbohydrate metabolic process;catabolic process;cellular ketone metabolic process;cellular metabolic process;cellular process;cofactor metabolic process;establishment of localization;metabolic process;organic acid metabolic process;primary metabolic process;protein targeting;protein transport;small molecule metabolic process;transport	2	15	15	15	53.1	53.1	53.1	40.73	377
Q03020	ISU1_YEAST	Iron sulfur cluster assembly protein 1, mitochondrial (Iron sulfur cluster scaffold protein 1)	ISU1 NUA1 YPL135W	0.424921	0.823087	-1.4496	0.201589	2 iron, 2 sulfur cluster binding;binding;cation binding;ferrous iron binding;ion binding;iron ion binding;iron-sulfur cluster binding;metal cluster binding;metal ion binding;transition metal ion binding	cell part;cytoplasmic part;intracellular organelle lumen;intracellular organelle part;intracellular part;membrane-enclosed lumen;mitochondrial matrix;mitochondrial part;organelle lumen;organelle part	biological regulation;biosynthetic process;cellular homeostasis;cellular ion homeostasis;cellular metabolic process;cellular nitrogen compound metabolic process;cellular process;cofactor metabolic process;homeostatic process;macromolecule metabolic process;macromolecule modification;metabolic process;nitrogen compound metabolic process;nucleobase-containing compound metabolic process;primary meta…	2	9	9	6	60	60	43	17.895	165
P40471	AYR1_YEAST	NADPH-dependent 1-acyldihydroxyacetone phosphate reductase (ADR) (EC 1.1.1.101) (1-acyl DHAP reductase) (Acyl/alkyl DHAP reductase) (Acylglycerone-phosphate reductase)	AYR1 YIL124W	0.543057	0.675982	-1.47702	0.257979	acylglycerone-phosphate reductase activity;carboxylic ester hydrolase activity;catalytic activity;hydrolase activity;hydrolase activity, acting on ester bonds;lipase activity;oxidoreductase activity;oxidoreductase activity, acting on CH-OH group of donors;oxidoreductase activity, acting on the CH-OH group of donors, NAD or NADP as acceptor;triglyceride lipase activity	cell part;cytoplasmic part;endoplasmic reticulum;intracellular membrane-bounded organelle;intracellular organelle;intracellular part;lipid particle;membrane-bounded organelle;organelle	biosynthetic process;catabolic process;cellular ketone metabolic process;cellular lipid metabolic process;cellular metabolic process;cellular process;glycerol ether metabolic process;lipid metabolic process;metabolic process;organic acid metabolic process;primary metabolic process;small molecule metabolic process	2	14	14	14	54.9	54.9	54.9	32.814	297
P00128	QCR7_YEAST	Cytochrome b-c1 complex subunit 7 (Complex III subunit 7) (Complex III subunit VII) (Ubiquinol-cytochrome c reductase c reductase complex 14 kDa protein)	QCR7 CRO1 UCR7 YDR529C D9719.32	0.727231	0.793254	-1.34588	-0.174603		cell part;cytoplasmic part;intracellular organelle part;intracellular part;macromolecular complex;membrane part;mitochondrial membrane part;mitochondrial part;mitochondrial respiratory chain complex III;organelle part;protein complex;respiratory chain complex III	cellular component assembly;cellular component organization;cellular macromolecular complex assembly;cellular metabolic process;cellular process;cellular respiration;generation of precursor metabolites and energy;macromolecular complex assembly;metabolic process;protein complex assembly;protein complex biogenesis	2	12	12	12	73.2	73.2	73.2	14.565	127
P30952	MASY_YEAST	Malate synthase 1, glyoxysomal (EC 2.3.3.9)	MLS1 YNL117W N1921	0.762661	0.690713	-1.39194	-0.0614379	catalytic activity;malate synthase activity;transferase activity;transferase activity, transferring acyl groups;transferase activity, transferring acyl groups, acyl groups converted into alkyl on transfer	cell part;cytoplasmic part;cytosol;glyoxysome;intracellular membrane-bounded organelle;intracellular organelle;intracellular organelle lumen;intracellular organelle part;intracellular part;membrane-bounded organelle;membrane-enclosed lumen;microbody;microbody lumen;microbody part;organelle;organelle lumen;organelle part;peroxisomal matrix;peroxisomal part;peroxisome	carbohydrate metabolic process;catabolic process;cellular aldehyde metabolic process;cellular ketone metabolic process;cellular metabolic process;cellular process;cofactor metabolic process;metabolic process;organic acid metabolic process;primary metabolic process;small molecule metabolic process	2	38	38	38	63.5	63.5	63.5	62.79	554
P33892	GCN1_YEAST	eIF-2-alpha kinase activator GCN1 (General control non-derepressible protein 1) (Translational activator GCN1)	GCN1 YGL195W G1318	0.552396	0.905916	-1.36588	-0.0924298		cell part;cytoplasmic part;cytosol;cytosolic part;cytosolic ribosome;intracellular non-membrane-bounded organelle;intracellular organelle;intracellular part;macromolecular complex;non-membrane-bounded organelle;organelle;ribonucleoprotein complex;ribosome	biological regulation;regulation of translation	2	102	102	102	44	44	44	296.69	2672
P32558	SPT16_YEAST	FACT complex subunit SPT16 (Cell division control protein 68) (Facilitates chromatin transcription complex subunit SPT16) (Suppressor of Ty protein 16)	SPT16 CDC68 SSF1 YGL207W	0.622569	0.844799	-1.37483	-0.0925377		cell part;chromatin;chromosomal part;FACT complex;intracellular organelle part;intracellular part;macromolecular complex;nuclear chromatin;nuclear chromosome part;nuclear part;nucleoplasm part;organelle part;protein complex;replication fork protection complex;transcription elongation factor complex	biological regulation;biosynthetic process;cellular component assembly;cellular component organization;cellular macromolecular complex assembly;cellular metabolic process;cellular nitrogen compound metabolic process;cellular process;chromatin organization;chromosome organization;DNA metabolic process;DNA repair;DNA replication;macromolecular complex assembly;macromolecule metabolic process;metabo…	2	59	59	59	62	62	62	118.63	1035
Q01574	ACS1_YEAST	Acetyl-coenzyme A synthetase 1 (EC 6.2.1.1) (Acetate--CoA ligase 1) (Acyl-activating enzyme 1)	ACS1 YAL054C FUN44	0.494399	0.881015	-1.40656	0.0311461	acetate-CoA ligase activity;acid-ammonia (or amide) ligase activity;acid-thiol ligase activity;adenyl nucleotide binding;adenyl ribonucleotide binding;AMP binding;ATP binding;binding;catalytic activity;CoA-ligase activity;ligase activity;ligase activity, forming carbon-nitrogen bonds;ligase activity, forming carbon-sulfur bonds;nucleotide binding;purine nucleotide binding;purine ribonucleoside tr…	cell part;cytoplasmic part;cytosol;endoplasmic reticulum;intracellular membrane-bounded organelle;intracellular organelle;intracellular part;membrane-bounded organelle;mitochondrion;nucleus;organelle	biosynthetic process;cellular component organization;cellular ketone metabolic process;cellular metabolic process;cellular process;chromatin modification;chromatin organization;chromosome organization;cofactor metabolic process;fermentation;generation of precursor metabolites and energy;histone modification;macromolecule metabolic process;macromolecule modification;metabolic process;organelle org…	2	41	41	40	56.5	56.5	55	79.14	713
P53549	PRS10_YEAST	26S protease subunit RPT4 (26S protease subunit SUG2) (Proteasomal cap subunit)	RPT4 CRL13 PCS1 SUG2 YOR259C	0.549816	0.784321	-1.43927	0.105131	adenyl nucleotide binding;adenyl ribonucleotide binding;ATP binding;ATPase activity;binding;catalytic activity;hydrolase activity;hydrolase activity, acting on acid anhydrides;hydrolase activity, acting on acid anhydrides, in phosphorus-containing anhydrides;nucleoside-triphosphatase activity;nucleotide binding;protein binding;protein domain specific binding;purine nucleotide binding;purine ribon…	cell part;cytoplasm;intracellular membrane-bounded organelle;intracellular organelle;intracellular part;macromolecular complex;membrane-bounded organelle;nucleus;organelle;proteasome regulatory particle, base subcomplex;protein complex	biological regulation;catabolic process;cellular component assembly;cellular component organization;cellular macromolecular complex assembly;cellular metabolic process;cellular nitrogen compound metabolic process;cellular process;DNA metabolic process;DNA repair;macromolecular complex assembly;macromolecule metabolic process;metabolic process;nitrogen compound metabolic process;nucleobase-contain…	2	28	28	27	62.2	62.2	59.5	49.408	437
P05150	OTC_YEAST	Ornithine carbamoyltransferase (EC 2.1.3.3) (Ornithine transcarbamylase) (OTCase)	ARG3 YJL088W J0924	0.635887	0.763157	-1.41875	0.0197055	amine binding;amino acid binding;binding;carboxyl- or carbamoyltransferase activity;carboxylic acid binding;catalytic activity;ornithine carbamoyltransferase activity;transferase activity;transferase activity, transferring one-carbon groups	cell part;cytoplasmic part;cytosol;intracellular part	amine metabolic process;biosynthetic process;cellular amino acid metabolic process;cellular ketone metabolic process;cellular metabolic process;cellular nitrogen compound metabolic process;cellular process;metabolic process;nitrogen compound metabolic process;organic acid metabolic process;primary metabolic process;small molecule metabolic process	2	17	17	17	65.4	65.4	65.4	37.845	338
Q12154	GET3_YEAST	ATPase GET3 (EC 3.6.-.-) (Arsenical pump-driving ATPase) (Arsenite-stimulated ATPase) (Golgi to ER traffic protein 3) (Guided entry of tail-anchored proteins 3)	GET3 ARR4 YDL100C D2371	0.58608	0.806984	-1.4159	0.0228322	adenyl nucleotide binding;adenyl ribonucleotide binding;ATP binding;ATPase activity;binding;catalytic activity;cation binding;enzyme regulator activity;GTPase regulator activity;guanyl-nucleotide exchange factor activity;hydrolase activity;hydrolase activity, acting on acid anhydrides;hydrolase activity, acting on acid anhydrides, in phosphorus-containing anhydrides;identical protein binding;ion …	cell part;cytoplasmic part;endoplasmic reticulum part;GET complex;Golgi apparatus;intracellular membrane-bounded organelle;intracellular organelle;intracellular organelle part;intracellular part;macromolecular complex;membrane-bounded organelle;organelle;organelle part;protein complex	biological regulation;cellular localization;cellular process;establishment of localization;Golgi vesicle transport;localization;protein targeting;protein transport;response to abiotic stimulus;response to chemical stimulus;response to heat;response to stimulus;response to stress;signal transduction;transport;vesicle-mediated transport	2	19	19	19	59	59	59	39.353	354
P50095	IMDH3_YEAST	Inosine-5'-monophosphate dehydrogenase 3 (IMP dehydrogenase 3) (IMPD 3) (IMPDH 3) (EC 1.1.1.205)	IMD3 YLR432W L9753.4	0.41398	0.351237	-1.4809	0.71568	binding;catalytic activity;cation binding;IMP dehydrogenase activity;ion binding;metal ion binding;nucleotide binding;oxidoreductase activity;oxidoreductase activity, acting on CH-OH group of donors;oxidoreductase activity, acting on the CH-OH group of donors, NAD or NADP as acceptor	cell part;cytoplasm;intracellular part	biosynthetic process;cellular metabolic process;cellular nitrogen compound metabolic process;cellular process;heterocycle metabolic process;metabolic process;nitrogen compound metabolic process;nucleobase-containing compound metabolic process;nucleobase-containing small molecule metabolic process;nucleotide metabolic process;primary metabolic process;small molecule metabolic process	2	24	24	9	61.6	61.6	28.7	56.584	523
P30624	LCF1_YEAST	Long-chain-fatty-acid--CoA ligase 1 (EC 6.2.1.3) (Fatty acid activator 1) (Long-chain acyl-CoA synthetase 1)	FAA1 YOR317W O6136	0.423048	0.327473	-1.47802	0.727497	adenyl nucleotide binding;adenyl ribonucleotide binding;ATP binding;binding;catalytic activity;fatty acid ligase activity;ligase activity;ligase activity, forming carbon-sulfur bonds;long-chain fatty acid-CoA ligase activity;medium-chain fatty acid-CoA ligase activity;nucleotide binding;purine nucleotide binding;purine ribonucleoside triphosphate binding;purine ribonucleotide binding;ribonucleoti…	cell part;cytoplasmic part;intracellular part;lipid particle	cellular ketone metabolic process;cellular lipid metabolic process;cellular metabolic process;cellular process;cofactor metabolic process;establishment of localization;lipid metabolic process;lipid transport;metabolic process;organic acid metabolic process;organic acid transport;primary metabolic process;small molecule metabolic process;transport	2	42	42	39	62.3	62.3	59.6	77.865	700
Q07478	SUB2_YEAST	ATP-dependent RNA helicase SUB2 (EC 3.6.4.13) (Suppressor of BRR1 protein 2)	SUB2 YDL084W	0.391562	0.404821	-1.48578	0.689395	adenyl nucleotide binding;adenyl ribonucleotide binding;ATP binding;ATPase activity;ATPase activity, coupled;ATP-dependent helicase activity;ATP-dependent RNA helicase activity;binding;catalytic activity;helicase activity;hydrolase activity;hydrolase activity, acting on acid anhydrides;hydrolase activity, acting on acid anhydrides, in phosphorus-containing anhydrides;nucleic acid binding;nucleosi…	cell part;chromosomal part;chromosome, telomeric region;intracellular organelle part;intracellular part;macromolecular complex;nuclear part;organelle part;protein complex;ribonucleoprotein complex;spliceosomal complex;transcription export complex	biological regulation;biosynthetic process;cellular metabolic process;cellular nitrogen compound metabolic process;cellular process;DNA metabolic process;DNA repair;establishment of localization;gene silencing;macromolecule metabolic process;metabolic process;mRNA metabolic process;mRNA processing;nitrogen compound metabolic process;nuclear transport;nucleobase-containing compound metabolic proce…	2	29	29	29	67.9	67.9	67.9	50.308	446
O13547	CCW14_YEAST	Covalently-linked cell wall protein 14 (Inner cell wall protein)	CCW14 ICWP SSR1 YLR390W-A YLR391W-A	0.33215	0.403843	-1.47609	0.740098	structural constituent of cell wall;structural molecule activity	anchored to membrane;cell part;cell wall;external encapsulating structure;extracellular region;fungal-type cell wall;intrinsic to membrane;membrane part	cell wall organization;cell wall organization or biogenesis;cellular cell wall organization;cellular cell wall organization or biogenesis;cellular component organization;cellular process;external encapsulating structure organization	2	4	4	4	18.1	18.1	18.1	23.268	238
P33298	PRS6B_YEAST	26S protease regulatory subunit 6B homolog (Protein YNT1) (Tat-binding homolog 2)	RPT3 YNT1 YTA2 YDR394W D9509.14	0.342791	0.436321	-1.4824	0.703287	adenyl nucleotide binding;adenyl ribonucleotide binding;ATP binding;ATPase activity;binding;catalytic activity;hydrolase activity;hydrolase activity, acting on acid anhydrides;hydrolase activity, acting on acid anhydrides, in phosphorus-containing anhydrides;identical protein binding;nucleoside-triphosphatase activity;nucleotide binding;protein binding;purine nucleotide binding;purine ribonucleos…	cell part;cytoplasm;intracellular membrane-bounded organelle;intracellular organelle;intracellular part;macromolecular complex;membrane-bounded organelle;nucleus;organelle;proteasome regulatory particle, base subcomplex;protein complex	biological regulation;catabolic process;cellular component assembly;cellular component organization;cellular macromolecular complex assembly;cellular metabolic process;cellular process;macromolecular complex assembly;macromolecule metabolic process;metabolic process;primary metabolic process;protein complex assembly;protein metabolic process;proteolysis;proteolysis involved in cellular protein ca…	2	25	24	24	72.9	70.1	70.1	47.893	428
P39522	ILV3_YEAST	Dihydroxy-acid dehydratase, mitochondrial (DAD) (EC 4.2.1.9) (2,3-dihydroxy acid hydrolyase)	ILV3 YJR016C J1450	0.149345	0.349835	-1.41808	0.918897	4 iron, 4 sulfur cluster binding;binding;carbon-oxygen lyase activity;catalytic activity;cation binding;dihydroxy-acid dehydratase activity;hydro-lyase activity;ion binding;iron-sulfur cluster binding;lyase activity;metal cluster binding;metal ion binding	cell part;cytoplasmic part;intracellular membrane-bounded organelle;intracellular organelle;intracellular part;membrane-bounded organelle;mitochondrion;organelle	amine metabolic process;biosynthetic process;cellular amino acid metabolic process;cellular ketone metabolic process;cellular metabolic process;cellular nitrogen compound metabolic process;cellular process;metabolic process;nitrogen compound metabolic process;organic acid metabolic process;primary metabolic process;small molecule metabolic process	2	32	32	32	64.3	64.3	64.3	62.86	585
P06634	DED1_YEAST	ATP-dependent RNA helicase DED1 (EC 3.6.4.13) (DEAD box protein 1)	DED1 SPP81 YOR204W	0.0982024	0.369841	-1.40535	0.937311	adenyl nucleotide binding;adenyl ribonucleotide binding;ATP binding;ATPase activity;ATPase activity, coupled;ATP-dependent helicase activity;ATP-dependent RNA helicase activity;binding;catalytic activity;double-stranded RNA binding;helicase activity;hydrolase activity;hydrolase activity, acting on acid anhydrides;hydrolase activity, acting on acid anhydrides, in phosphorus-containing anhydrides;n…	cell part;cytoplasm;intracellular membrane-bounded organelle;intracellular organelle;intracellular part;membrane-bounded organelle;nucleus;organelle	cellular component disassembly;cellular component organization;cellular process;translational initiation	2	30	30	24	69	69	60.8	65.552	604
Q06103	RPN7_YEAST	26S proteasome regulatory subunit RPN7	RPN7 YPR108W P8283.8	0.180319	0.244256	-1.39924	0.974661	structural molecule activity	cell part;intracellular membrane-bounded organelle;intracellular organelle;intracellular part;macromolecular complex;membrane-bounded organelle;nucleus;organelle;proteasome regulatory particle, lid subcomplex;protein complex	catabolic process;cellular metabolic process;cellular process;macromolecule metabolic process;metabolic process;primary metabolic process;protein metabolic process;proteolysis;proteolysis involved in cellular protein catabolic process	2	28	28	28	59.9	59.9	59.9	48.958	429
P00937	TRPG_YEAST	Multifunctional tryptophan biosynthesis protein [Includes: Anthranilate synthase component 2 (AS) (EC 4.1.3.27) (Anthranilate synthase, glutamine amidotransferase component); Indole-3-glycerol phosphate synthase (EC 4.1.1.48) (PRAI)]	TRP3 YKL211C	0.0935675	0.627502	-1.44163	0.720556	anthranilate synthase activity;carbon-carbon lyase activity;carboxy-lyase activity;catalytic activity;indole-3-glycerol-phosphate synthase activity;lyase activity;oxo-acid-lyase activity;transferase activity	anthranilate synthase complex;cell part;cytoplasmic part;intracellular part;macromolecular complex;protein complex	amine metabolic process;biosynthetic process;cellular amino acid metabolic process;cellular aromatic compound metabolic process;cellular ketone metabolic process;cellular metabolic process;cellular nitrogen compound metabolic process;cellular process;heterocycle metabolic process;metabolic process;nitrogen compound metabolic process;organic acid metabolic process;primary metabolic process;small m…	2	25	25	25	57.9	57.9	57.9	53.489	484
Q12207	NCE2_YEAST	Non-classical export protein 2	NCE102 NCE2 RTG2S2 YPR149W P9659.2	0.176008	0.653061	-1.46307	0.634001		cell part;cell projection membrane;cell projection part;cellular bud membrane;integral to membrane;intrinsic to membrane;mating projection membrane;membrane;membrane part;plasma membrane;plasma membrane part	biological regulation;cellular component assembly;cellular component organization;cellular macromolecular complex assembly;cellular membrane organization;cellular process;establishment of localization;macromolecular complex assembly;membrane organization;plasma membrane organization;protein complex assembly;protein transport;regulation of protein modification process;secretion;transport	2	6	6	6	26	26	26	18.967	173
P05319	RLA2_YEAST	60S acidic ribosomal protein P2-alpha (A2) (L12eIB) (L44) (Large ribosomal subunit protein P2-A) (P2A) (YP2alpha)	RPP2A L12EIB RPA2 RPL44 RPLA2 YOL039W	0.156913	0.590502	-1.45707	0.70966	enzyme activator activity;enzyme regulator activity;kinase activator activity;kinase regulator activity;protein kinase activator activity;protein kinase regulator activity;structural constituent of ribosome;structural molecule activity	cell part;cytosolic large ribosomal subunit;intracellular organelle part;intracellular part;large ribosomal subunit;macromolecular complex;organelle part;ribonucleoprotein complex	biological regulation;biosynthetic process;cellular metabolic process;cellular process;cytoplasmic translation;macromolecule metabolic process;metabolic process;primary metabolic process;protein metabolic process;regulation of protein modification process;translation;translational elongation	2	7	7	7	98.1	98.1	98.1	10.746	106
P07702	LYS2_YEAST	L-2-aminoadipate reductase (EC 1.2.1.31) (EC 1.2.1.95) (Alpha-aminoadipate reductase) (Alpha-AR) (L-aminoadipate-semialdehyde dehydrogenase)	LYS2 YBR115C YBR0910	0.505699	0.0755456	-1.42412	0.842877	catalytic activity;L-aminoadipate-semialdehyde dehydrogenase activity;oxidoreductase activity;oxidoreductase activity, acting on the aldehyde or oxo group of donors;oxidoreductase activity, acting on the aldehyde or oxo group of donors, NAD or NADP as acceptor	cell part;cytoplasm;intracellular part	amine metabolic process;biosynthetic process;cellular amino acid metabolic process;cellular ketone metabolic process;cellular metabolic process;cellular nitrogen compound metabolic process;cellular process;metabolic process;nitrogen compound metabolic process;organic acid metabolic process;primary metabolic process;small molecule metabolic process	2	55	55	55	52.1	52.1	52.1	155.34	1392
P40495	LYS12_YEAST	Homoisocitrate dehydrogenase, mitochondrial (HIcDH) (EC 1.1.1.87)	LYS12 LYS10 LYS11 YIL094C YI9910.02C	0.553604	0.118124	-1.44355	0.771827	binding;catalytic activity;cation binding;coenzyme binding;cofactor binding;homoisocitrate dehydrogenase activity;ion binding;magnesium ion binding;metal ion binding;NAD binding;nucleotide binding;oxidoreductase activity;oxidoreductase activity, acting on CH-OH group of donors;oxidoreductase activity, acting on the CH-OH group of donors, NAD or NADP as acceptor	cell part;cytoplasmic part;intracellular membrane-bounded organelle;intracellular organelle;intracellular part;membrane-bounded organelle;mitochondrion;organelle	amine metabolic process;biosynthetic process;cellular amino acid metabolic process;cellular ketone metabolic process;cellular metabolic process;cellular nitrogen compound metabolic process;cellular process;metabolic process;nitrogen compound metabolic process;organic acid metabolic process;primary metabolic process;small molecule metabolic process	2	25	25	25	57.1	57.1	57.1	40.068	371
P49954	NIT3_YEAST	Probable hydrolase NIT3 (EC 3.5.-.-)	NIT3 YLR351C L9638.5	0.562037	0.0805108	-1.43285	0.790301	catalytic activity;hydrolase activity;hydrolase activity, acting on carbon-nitrogen (but not peptide) bonds		metabolic process;nitrogen compound metabolic process	2	16	16	16	56	56	56	32.549	291
P32610	VATD_YEAST	V-type proton ATPase subunit D (V-ATPase subunit D) (Vacuolar proton pump subunit D)	VMA8 YEL051W SYGP-ORF11	0.469551	0.22825	-1.46334	0.765541	active transmembrane transporter activity;ATPase activity;ATPase activity, coupled;ATPase activity, coupled to movement of substances;ATPase activity, coupled to transmembrane movement of ions;ATPase activity, coupled to transmembrane movement of substances;catalytic activity;cation transmembrane transporter activity;cation-transporting ATPase activity;hydrogen ion transmembrane transporter activ…	cell part;cytoplasmic part;fungal-type vacuole membrane;intracellular organelle part;intracellular part;macromolecular complex;membrane;membrane part;organelle membrane;organelle part;protein complex;proton-transporting two-sector ATPase complex, catalytic domain;proton-transporting V-type ATPase, V1 domain;vacuolar membrane;vacuolar part;vacuolar proton-transporting V-type ATPase, V1 domain	biological regulation;cellular homeostasis;cellular ion homeostasis;cellular process;homeostatic process	2	12	12	12	65.2	65.2	65.2	29.194	256
P36010	NDK_YEAST	Nucleoside diphosphate kinase (NDK) (NDP kinase) (EC 2.7.4.6)	YNK1 NDK1 YNK YKL067W YKL333	0.418796	-0.002558	-1.37816	0.961919	adenyl nucleotide binding;adenyl ribonucleotide binding;ATP binding;binding;catalytic activity;cation binding;identical protein binding;ion binding;kinase activity;metal ion binding;nucleobase-containing compound kinase activity;nucleoside diphosphate kinase activity;nucleotide binding;phosphotransferase activity, phosphate group as acceptor;protein binding;purine nucleotide binding;purine ribonu…	cell part;cytoplasmic part;cytosol;intracellular organelle part;intracellular part;membrane-enclosed lumen;mitochondrial intermembrane space;mitochondrial part;organelle envelope lumen;organelle part	biosynthetic process;cellular metabolic process;cellular nitrogen compound metabolic process;cellular process;DNA metabolic process;DNA repair;heterocycle metabolic process;macromolecule metabolic process;metabolic process;nitrogen compound metabolic process;nucleobase-containing compound metabolic process;nucleobase-containing small molecule metabolic process;nucleoside metabolic process;nucleot…	2	15	15	15	77.1	77.1	77.1	17.166	153
P46683	YAR1_YEAST	Ankyrin repeat-containing protein YAR1	YAR1 YPL239W	-0.175385	0.375811	-1.2851	1.08468	binding;protein binding;unfolded protein binding	cell part;intracellular membrane-bounded organelle;intracellular organelle;intracellular part;membrane-bounded organelle;nucleus;organelle	biological regulation;cellular localization;cellular process;establishment of localization;localization;nuclear transport;nucleocytoplasmic transport;response to abiotic stimulus;response to chemical stimulus;response to osmotic stress;response to oxidative stress;response to stimulus;response to stress;ribosomal small subunit biogenesis;ribosomal subunit export from nucleus;transport	2	11	11	11	76.5	76.5	76.5	22.355	200
P38353	SSH1_YEAST	Sec sixty-one protein homolog (Ssh1 complex subunit SSH1) (Ssh1 complex subunit alpha)	SSH1 YBR283C YBR2020	-0.186736	0.683781	-1.33803	0.840984	binding;macromolecule transmembrane transporter activity;peptide binding;protein transmembrane transporter activity;protein transporter activity;signal sequence binding;substrate-specific transmembrane transporter activity;substrate-specific transporter activity;transmembrane transporter activity;transporter activity	cell part;cytoplasmic part;endoplasmic reticulum part;integral to membrane;intracellular organelle part;intracellular part;intrinsic to membrane;macromolecular complex;membrane part;organelle part;protein complex;Ssh1 translocon complex;translocon complex	cellular process;establishment of localization;protein targeting;protein transport;transmembrane transport;transport	2	10	10	10	18.4	18.4	18.4	53.311	490
P38879	NACA_YEAST	Nascent polypeptide-associated complex subunit alpha (NAC-alpha) (Alpha-NAC) (GAL4 DNA-binding enhancer protein 2)	EGD2 YHR193C	0.00975674	0.509748	-1.40105	0.881545	binding;lipid binding;phosphatidic acid binding;phosphatidylinositol binding;phosphatidylinositol-3,5-bisphosphate binding;phosphatidylinositol-3-phosphate binding;phosphatidylinositol-4-phosphate binding;phospholipid binding;protein binding;unfolded protein binding	cell part;cytoplasmic part;intracellular membrane-bounded organelle;intracellular organelle;intracellular part;macromolecular complex;membrane-bounded organelle;nascent polypeptide-associated complex;nucleus;organelle;protein complex	cellular metabolic process;cellular process;establishment of localization;macromolecule metabolic process;metabolic process;primary metabolic process;protein folding;protein metabolic process;protein targeting;protein transport;transport	2	11	11	11	56.3	56.3	56.3	18.709	174
P32790	SLA1_YEAST	Actin cytoskeleton-regulatory complex protein SLA1	SLA1 YBL007C YBL0321	0.11505	0.752996	-1.44472	0.576672	binding;binding, bridging;identical protein binding;protein binding;protein binding, bridging;small conjugating protein binding;ubiquitin binding	actin cortical patch;cell cortex;cell cortex part;cell part;cytoplasmic part;cytoskeletal part;endosomal part;endosome membrane;intracellular membrane-bounded organelle;intracellular organelle;intracellular organelle part;intracellular part;membrane;membrane-bounded organelle;nucleus;organelle;organelle membrane;organelle part;plasma membrane	cell wall organization;cell wall organization or biogenesis;cellular cell wall organization;cellular cell wall organization or biogenesis;cellular component assembly;cellular component organization;cellular macromolecular complex assembly;cellular membrane organization;cellular process;cytoskeleton organization;endocytosis;establishment of localization;external encapsulating structure organizatio…	2	29	29	29	29.3	29.3	29.3	135.85	1244
P27476	NSR1_YEAST	Nuclear localization sequence-binding protein (p67)	NSR1 YGR159C G7001	-0.117021	0.973359	-1.34256	0.486222	binding;DNA binding;nucleic acid binding;nucleotide binding;RNA binding;single-stranded DNA binding;structure-specific DNA binding	cell part;intracellular non-membrane-bounded organelle;intracellular organelle;intracellular organelle part;intracellular part;non-membrane-bounded organelle;nuclear part;nucleolus;organelle;organelle part	cellular component assembly;cellular component organization;cellular macromolecular complex assembly;cellular metabolic process;cellular nitrogen compound metabolic process;cellular process;macromolecular complex assembly;macromolecule metabolic process;metabolic process;nitrogen compound metabolic process;nucleobase-containing compound metabolic process;primary metabolic process;ribonucleoprotei…	2	19	19	19	40.8	40.8	40.8	44.535	414
P29509	TRXB1_YEAST	Thioredoxin reductase 1 (EC 1.8.1.9)	TRR1 YDR353W D9476.5	0.00695494	0.904822	-1.39546	0.48368	antioxidant activity;binding;catalytic activity;cation binding;coenzyme binding;cofactor binding;ferrous iron binding;flavin adenine dinucleotide binding;ion binding;iron ion binding;metal ion binding;oxidoreductase activity;oxidoreductase activity, acting on a sulfur group of donors;oxidoreductase activity, acting on a sulfur group of donors, NAD or NADP as acceptor;oxidoreductase activity, acti…	cell part;cytoplasmic part;cytosol;intracellular organelle part;intracellular part;membrane-enclosed lumen;mitochondrial intermembrane space;mitochondrial part;organelle envelope lumen;organelle part	biological regulation;cellular homeostasis;cellular metabolic process;cellular process;homeostatic process;metabolic process;response to chemical stimulus;response to oxidative stress;response to stimulus;response to stress	2	17	17	16	64.3	64.3	56.1	34.238	319
P22146	GAS1_YEAST	1,3-beta-glucanosyltransferase GAS1 (EC 2.4.1.-) (Glycolipid-anchored surface protein 1) (Glycoprotein GP115)	GAS1 GGP1 YMR307W YM9952.09	0.195681	0.885825	-1.433	0.35149	1,3-beta-glucanosyltransferase activity;catalytic activity;glucanosyltransferase activity;transferase activity	anchored to membrane;cell part;cell septum;cell wall;cell wall part;cellular bud scar;coated vesicle;cytoplasmic membrane-bounded vesicle;cytoplasmic part;cytoplasmic vesicle;ER to Golgi transport vesicle;external encapsulating structure;external encapsulating structure part;extracellular region;fungal-type cell wall;intracellular membrane-bounded organelle;intracellular organelle;intracellular o…	biological regulation;carbohydrate metabolic process;cell wall organization;cell wall organization or biogenesis;cellular cell wall organization;cellular cell wall organization or biogenesis;cellular component organization;cellular process;external encapsulating structure organization;filamentous growth;gene silencing;growth;metabolic process;primary metabolic process;regulation of gene expressio…	2	18	18	18	28.8	28.8	28.8	59.582	559
P21965	MCK1_YEAST	Protein kinase MCK1 (EC 2.7.12.1) (Meiosis and centromere regulatory kinase)	MCK1 YPK1 YNL307C N0392	1.18838	-0.247001	-1.20678	0.265401	adenyl nucleotide binding;adenyl ribonucleotide binding;ATP binding;binding;catalytic activity;cyclin binding;enzyme inhibitor activity;enzyme regulator activity;kinase activity;nucleotide binding;phosphotransferase activity, alcohol group as acceptor;protein binding;protein kinase activity;protein serine/threonine kinase activity;protein serine/threonine/tyrosine kinase activity;purine nucleotid…		anatomical structure development;anatomical structure formation involved in morphogenesis;ascospore formation;biological regulation;cell development;cell differentiation;cellular component organization;cellular metabolic process;cellular nitrogen compound metabolic process;cellular process;chromosome organization;chromosome segregation;developmental process;DNA metabolic process;DNA repair;macrom…	3	18	18	18	51.7	51.7	51.7	43.135	375
P47137	YJ66_YEAST	Uncharacterized oxidoreductase YJR096W (EC 1.-.-.-)	YJR096W J1926	1.28725	0.0172843	-1.14814	-0.156398	alcohol dehydrogenase (NADP+) activity;alditol:NADP+ 1-oxidoreductase activity;aldo-keto reductase (NADP) activity;catalytic activity;oxidoreductase activity;oxidoreductase activity, acting on CH-OH group of donors;oxidoreductase activity, acting on the CH-OH group of donors, NAD or NADP as acceptor		alcohol metabolic process;carbohydrate metabolic process;catabolic process;cellular metabolic process;cellular process;metabolic process;primary metabolic process;response to chemical stimulus;response to oxidative stress;response to stimulus;response to stress;small molecule metabolic process	3	22	22	22	82.3	82.3	82.3	32.344	282
P00358	G3P2_YEAST	Glyceraldehyde-3-phosphate dehydrogenase 2 (GAPDH 2) (EC 1.2.1.12)	TDH2 GPD2 YJR009C J1433	1.48961	-0.364831	-0.650158	-0.474619	binding;catalytic activity;coenzyme binding;cofactor binding;glyceraldehyde-3-phosphate dehydrogenase (NAD+) (phosphorylating) activity;NAD binding;NADP binding;nucleotide binding;oxidoreductase activity;oxidoreductase activity, acting on the aldehyde or oxo group of donors;oxidoreductase activity, acting on the aldehyde or oxo group of donors, NAD or NADP as acceptor	cell part;cell wall;cytoplasm;cytoplasmic part;external encapsulating structure;fungal-type cell wall;intracellular membrane-bounded organelle;intracellular organelle;intracellular part;lipid particle;membrane-bounded organelle;mitochondrion;organelle	alcohol metabolic process;biosynthetic process;carbohydrate metabolic process;catabolic process;cell death;cellular metabolic process;cellular process;death;generation of precursor metabolites and energy;metabolic process;primary metabolic process;small molecule metabolic process	3	46	7	7	97.3	31.9	31.9	35.846	332
P0CX28	RL44B_YEAST	60S ribosomal protein L42-B (L41) (Large ribosomal subunit protein eL42-B) (Maintenance of killer protein 18) (YL27) (YP44)	RPL42B MAK18 RPL41B SCL41B YHR141C	1.41619	-0.0913915	-0.895322	-0.429477	structural constituent of ribosome;structural molecule activity	cell part;cytosolic large ribosomal subunit;intracellular organelle part;intracellular part;large ribosomal subunit;macromolecular complex;organelle part;ribonucleoprotein complex	biosynthetic process;cellular metabolic process;cellular process;cytoplasmic translation;macromolecule metabolic process;metabolic process;primary metabolic process;protein metabolic process;response to chemical stimulus;response to stimulus;translation	3	7	7	7	33	33	33	12.211	106
Q12012	YO289_YEAST	Uncharacterized protein YOR289W	YOR289W	1.44654	-0.151164	-0.496568	-0.798808				3	13	13	13	51.4	51.4	51.4	29.099	251
P33315	TKT2_YEAST	Transketolase 2 (TK 2) (EC 2.2.1.1)	TKL2 YBR117C YBR0912	1.40171	-0.0161691	-0.499035	-0.88651	binding;catalytic activity;cation binding;ion binding;metal ion binding;transferase activity;transferase activity, transferring aldehyde or ketonic groups;transketolase activity		alcohol metabolic process;carbohydrate metabolic process;catabolic process;cellular metabolic process;cellular nitrogen compound metabolic process;cellular process;cofactor metabolic process;heterocycle metabolic process;metabolic process;nitrogen compound metabolic process;nucleobase-containing compound metabolic process;nucleobase-containing small molecule metabolic process;nucleotide metabolic…	3	27	27	27	51.1	51.1	51.1	75.028	681
P00890	CISY1_YEAST	Citrate synthase, mitochondrial (EC 2.3.3.1)	CIT1 GLU3 LYS6 YNR001C N2019	1.22713	0.393621	-0.696847	-0.923909	catalytic activity;citrate (Si)-synthase activity;transferase activity;transferase activity, transferring acyl groups;transferase activity, transferring acyl groups, acyl groups converted into alkyl on transfer	cell part;cytoplasmic part;cytosol;intracellular membrane-bounded organelle;intracellular organelle;intracellular organelle lumen;intracellular organelle part;intracellular part;membrane-bounded organelle;membrane-enclosed lumen;mitochondrial intermembrane space;mitochondrial matrix;mitochondrial part;mitochondrion;organelle;organelle envelope lumen;organelle lumen;organelle part	amine metabolic process;biosynthetic process;carbohydrate metabolic process;catabolic process;cellular amino acid metabolic process;cellular ketone metabolic process;cellular metabolic process;cellular nitrogen compound metabolic process;cellular process;cofactor metabolic process;metabolic process;nitrogen compound metabolic process;organic acid metabolic process;primary metabolic process;small …	3	38	38	36	68.9	68.9	63.3	53.359	479
P05453	ERF3_YEAST	Eukaryotic peptide chain release factor GTP-binding subunit (ERF-3) (ERF3) (ERF2) (G1 to S phase transition protein 1) (Omnipotent suppressor protein 2) (PSI no more protein 2) (Polypeptide release factor 3) (Translation release factor 3)	SUP35 GST1 PNM2 SAL3 SUF12 SUP2 YDR172W YD9395.05	1.23234	0.393277	-0.864575	-0.761041	binding;catalytic activity;GTP binding;GTPase activity;guanyl nucleotide binding;guanyl ribonucleotide binding;hydrolase activity;hydrolase activity, acting on acid anhydrides;hydrolase activity, acting on acid anhydrides, in phosphorus-containing anhydrides;nucleic acid binding;nucleoside-triphosphatase activity;nucleotide binding;purine nucleotide binding;purine ribonucleoside triphosphate bind…	cell part;cytoplasmic part;cytosol;intracellular non-membrane-bounded organelle;intracellular organelle;intracellular part;macromolecular complex;non-membrane-bounded organelle;organelle;protein complex;ribonucleoprotein complex;RNA granule;stress granule;translation release factor complex	catabolic process;cellular component disassembly;cellular component organization;cellular metabolic process;cellular nitrogen compound metabolic process;cellular process;macromolecule metabolic process;metabolic process;mRNA metabolic process;nitrogen compound metabolic process;nucleobase-containing compound metabolic process;primary metabolic process;RNA catabolic process;RNA metabolic process	3	36	36	36	59.6	59.6	59.6	76.55	685
P38081	YBQ6_YEAST	Uncharacterized glycosyl hydrolase YBR056W (EC 3.2.1.-)	YBR056W YBR0510	1.3204	0.22282	-0.681769	-0.861448	catalytic activity;hydrolase activity;hydrolase activity, acting on glycosyl bonds	cell part;cytoplasmic part;intracellular organelle part;intracellular part;membrane-enclosed lumen;mitochondrial intermembrane space;mitochondrial part;organelle envelope lumen;organelle part	carbohydrate metabolic process;metabolic process;primary metabolic process	3	34	34	34	55.1	55.1	55.1	57.821	501
P49626	RL4B_YEAST	60S ribosomal protein L4-B (L2) (Large ribosomal subunit protein uL4-B) (RP2) (YL2)	RPL4B RPL2B YDR012W YD8119.17	1.27222	0.324856	-0.815925	-0.78115	binding;nucleic acid binding;RNA binding;structural constituent of ribosome;structural molecule activity	cell part;cytosolic large ribosomal subunit;intracellular organelle part;intracellular part;large ribosomal subunit;macromolecular complex;organelle part;ribonucleoprotein complex	biosynthetic process;cellular metabolic process;cellular process;cytoplasmic translation;macromolecule metabolic process;metabolic process;primary metabolic process;protein metabolic process;translation	3	21	2	2	60.2	4.4	4.4	39.062	362
P42943	TCPH_YEAST	T-complex protein 1 subunit eta (TCP-1-eta) (CCT-eta)	CCT7 YJL111W J0804	1.27121	0.310643	-0.656018	-0.925834	adenyl nucleotide binding;adenyl ribonucleotide binding;ATP binding;binding;nucleotide binding;protein binding;purine nucleotide binding;purine ribonucleoside triphosphate binding;purine ribonucleotide binding;ribonucleotide binding;unfolded protein binding	cell part;chaperonin-containing T-complex;cytoplasmic part;cytosolic part;intracellular part;macromolecular complex;protein complex	cellular metabolic process;cellular process;macromolecule metabolic process;metabolic process;primary metabolic process;protein folding;protein metabolic process	3	32	32	32	70.2	70.2	70.2	59.735	550
P47068	BBC1_YEAST	Myosin tail region-interacting protein MTI1 (Protein BBC1)	BBC1 MTI1 YJL020C J1286 J1305 YJL021C	1.24639	0.35062	-0.954009	-0.643	binding;cytoskeletal protein binding;myosin binding;myosin I binding;protein binding	actin cortical patch;cell cortex part;cell part;cytoplasmic part;cytoskeletal part;intracellular organelle part;intracellular part;organelle part	cellular component organization;cellular process;cytoskeleton organization;organelle organization	3	52	52	52	53.2	53.2	53.2	128.29	1157
Q12032	AIM41_YEAST	Altered inheritance of mitochondria protein 41, mitochondrial	AIM41 YOR215C YOR50-5	1.20188	0.41846	-0.994066	-0.626271	carbon-nitrogen ligase activity, with glutamine as amido-N-donor;catalytic activity;ligase activity;ligase activity, forming carbon-nitrogen bonds	cell part;cytoplasmic part;intracellular membrane-bounded organelle;intracellular organelle;intracellular part;membrane-bounded organelle;mitochondrion;organelle		3	13	13	13	47	47	47	21.229	185
P0C2H9	RL31B_YEAST	60S ribosomal protein L31-B (L34) (Large ribosomal subunit protein eL31-B) (YL28)	RPL31B RPL34 RPL34B YLR406C	1.26506	0.269557	-1.04067	-0.493941	structural constituent of ribosome;structural molecule activity	cell part;cytosolic large ribosomal subunit;intracellular organelle part;intracellular part;large ribosomal subunit;macromolecular complex;organelle part;ribonucleoprotein complex	biological regulation;biosynthetic process;cellular metabolic process;cellular process;cytoplasmic translation;macromolecule metabolic process;metabolic process;primary metabolic process;protein metabolic process;regulation of translation;translation	3	12	1	1	71.7	8	8	12.967	113
P11632	NHP6A_YEAST	Non-histone chromosomal protein 6A	NHP6A NHPA YPR052C YP9499.09C	1.28785	0.251189	-0.986357	-0.552679	binding;chromatin binding;DNA bending activity;DNA binding;nucleic acid binding;nucleosome binding	cell part;chromosome;intracellular membrane-bounded organelle;intracellular non-membrane-bounded organelle;intracellular organelle;intracellular part;membrane-bounded organelle;non-membrane-bounded organelle;nucleus;organelle	biological regulation;biosynthetic process;cellular component assembly;cellular component organization;cellular macromolecular complex assembly;cellular metabolic process;cellular nitrogen compound metabolic process;cellular process;chromatin modification;chromatin organization;chromosome organization;DNA metabolic process;DNA repair;macromolecular complex assembly;macromolecule metabolic process…	3	5	5	5	44.1	44.1	44.1	10.802	93
Q06177	TMA10_YEAST	Translation machinery-associated protein 10	TMA10 YLR327C L8543.1	1.19375	0.433611	-0.990852	-0.636512		cell part;cytoplasmic part;intracellular membrane-bounded organelle;intracellular organelle;intracellular part;membrane-bounded organelle;mitochondrion;organelle		3	6	6	6	62.8	62.8	62.8	9.8337	86
P28495	CAPZA_YEAST	F-actin-capping protein subunit alpha	CAP1 YKL007W YKL155	1.3396	0.187115	-0.813509	-0.713206	actin binding;actin filament binding;binding;cytoskeletal protein binding;protein binding	actin cortical patch;actin filament;cell cortex part;cell part;cytoplasmic part;cytoskeletal part;F-actin capping protein complex;intracellular organelle part;intracellular part;macromolecular complex;organelle part;protein complex	biological regulation;cellular component organization;regulation of organelle organization	3	13	13	13	62.7	62.7	62.7	30.699	268
P49334	TOM22_YEAST	Mitochondrial import receptor subunit TOM22 (Mitochondrial 17 kDa assembly protein) (Mitochondrial 22 kDa outer membrane protein) (Protein MAS17) (Translocase of outer membrane 22 kDa subunit)	TOM22 MAS17 MAS22 MOM22 YNL131W N1217 N1862	1.32048	0.221693	-0.866068	-0.676103		cell part;cytoplasmic part;integral to membrane;integral to mitochondrial membrane;integral to mitochondrial outer membrane;integral to organelle membrane;intracellular organelle part;intracellular part;intrinsic to membrane;intrinsic to mitochondrial outer membrane;intrinsic to organelle membrane;macromolecular complex;membrane;membrane part;mitochondrial membrane;mitochondrial membrane part;mit…	cellular component organization;cellular membrane organization;cellular process;establishment of localization;membrane organization;mitochondrion organization;organelle organization;protein targeting;protein transport;transmembrane transport;transport	3	4	4	4	34.2	34.2	34.2	16.79	152
P25372	TRX3_YEAST	Thioredoxin-3, mitochondrial	TRX3 YCR083W YCR83W	1.35991	0.139198	-0.8112	-0.687909	catalytic activity;disulfide oxidoreductase activity;oxidoreductase activity;oxidoreductase activity, acting on a sulfur group of donors;protein disulfide oxidoreductase activity	cell part;cytoplasmic part;intracellular membrane-bounded organelle;intracellular organelle;intracellular part;membrane-bounded organelle;mitochondrion;organelle	biological regulation;cellular homeostasis;cellular process;glycerol ether metabolic process;homeostatic process;metabolic process;response to chemical stimulus;response to oxidative stress;response to stimulus;response to stress;small molecule metabolic process	3	9	9	9	55.9	55.9	55.9	14.432	127
P25374	NFS1_YEAST	Cysteine desulfurase, mitochondrial (EC 2.8.1.7) (tRNA-splicing protein SPL1)	NFS1 SPL1 YCL017C	1.34691	0.147377	-0.901504	-0.592786	binding;catalytic activity;cation binding;cofactor binding;cysteine desulfurase activity;ion binding;iron-sulfur cluster binding;metal cluster binding;metal ion binding;pyridoxal phosphate binding;sulfurtransferase activity;transferase activity;transferase activity, transferring sulfur-containing groups;vitamin B6 binding;vitamin binding	cell part;cytoplasmic part;intracellular membrane-bounded organelle;intracellular organelle;intracellular part;membrane-bounded organelle;mitochondrion;nucleus;organelle	amine metabolic process;biological regulation;biosynthetic process;cellular amino acid metabolic process;cellular component organization;cellular homeostasis;cellular ion homeostasis;cellular ketone metabolic process;cellular metabolic process;cellular nitrogen compound metabolic process;cellular process;cofactor metabolic process;heterocycle metabolic process;homeostatic process;macromolecule me…	3	22	22	22	58.8	58.8	58.8	54.466	497
P19657	PMA2_YEAST	Plasma membrane ATPase 2 (EC 3.6.3.6) (Proton pump 2)	PMA2 YPL036W	1.34977	0.126759	-0.927969	-0.548563	active transmembrane transporter activity;adenyl nucleotide binding;adenyl ribonucleotide binding;ATP binding;ATPase activity;ATPase activity, coupled;ATPase activity, coupled to movement of substances;ATPase activity, coupled to transmembrane movement of ions;ATPase activity, coupled to transmembrane movement of ions, phosphorylative mechanism;ATPase activity, coupled to transmembrane movement o…	cell part;integral to membrane;intrinsic to membrane;membrane;membrane part;plasma membrane	biological regulation;biosynthetic process;cellular metabolic process;cellular nitrogen compound metabolic process;cellular process;establishment of localization;heterocycle metabolic process;homeostatic process;hydrogen transport;ion transport;metabolic process;nitrogen compound metabolic process;nucleobase-containing compound metabolic process;nucleobase-containing small molecule metabolic proc…	3	46	9	9	44.5	14.3	14.3	102.17	947
P30657	PSB7_YEAST	Proteasome subunit beta type-7 (EC 3.4.25.1) (Macropain subunit PRE4) (Multicatalytic endopeptidase complex subunit PRE4) (Proteasome component PRE4) (Proteinase YSCE subunit PRE4)	PRE4 YFR050C	1.3845	0.0422873	-0.891588	-0.5352	catalytic activity;endopeptidase activity;hydrolase activity;peptidase activity;peptidase activity, acting on L-amino acid peptides;threonine-type endopeptidase activity;threonine-type peptidase activity	cell part;cytoplasmic part;cytosolic part;cytosolic proteasome complex;endoplasmic reticulum membrane;endoplasmic reticulum part;intracellular membrane-bounded organelle;intracellular organelle;intracellular organelle part;intracellular part;macromolecular complex;membrane;membrane part;membrane-bounded organelle;nucleus;organelle;organelle membrane;organelle part;proteasome complex;proteasome co…	catabolic process;cellular component assembly;cellular component organization;cellular macromolecular complex assembly;cellular metabolic process;cellular process;macromolecular complex assembly;macromolecule metabolic process;metabolic process;primary metabolic process;protein complex assembly;protein metabolic process;proteolysis;proteolysis involved in cellular protein catabolic process	3	9	9	9	48.5	48.5	48.5	29.443	266
P22141	PSB4_YEAST	Proteasome subunit beta type-4 (EC 3.4.25.1) (Macropain subunit C11) (Multicatalytic endopeptidase complex subunit C11) (Proteasome component C11) (Proteinase YSCE subunit 11)	PRE1 YER012W	1.37757	0.0806446	-0.856788	-0.601426	catalytic activity;endopeptidase activator activity;endopeptidase activity;endopeptidase regulator activity;enzyme activator activity;enzyme regulator activity;hydrolase activity;peptidase activator activity;peptidase activity;peptidase activity, acting on L-amino acid peptides;peptidase regulator activity;threonine-type endopeptidase activity;threonine-type peptidase activity	cell part;cytoplasmic part;cytosolic part;cytosolic proteasome complex;endoplasmic reticulum membrane;endoplasmic reticulum part;intracellular membrane-bounded organelle;intracellular organelle;intracellular organelle part;intracellular part;macromolecular complex;membrane;membrane part;membrane-bounded organelle;nucleus;organelle;organelle membrane;organelle part;proteasome complex;proteasome co…	biological regulation;catabolic process;cellular metabolic process;cellular process;macromolecule metabolic process;metabolic process;primary metabolic process;protein metabolic process;proteolysis;proteolysis involved in cellular protein catabolic process	3	11	11	11	65.2	65.2	65.2	22.516	198
Q06625	GDE_YEAST	Glycogen debranching enzyme (Glycogen debrancher) [Includes: 4-alpha-glucanotransferase (EC 2.4.1.25) (Oligo-1,4-1,4-glucantransferase); Amylo-alpha-1,6-glucosidase (Amylo-1,6-glucosidase) (EC 3.2.1.33) (Dextrin 6-alpha-D-glucosidase)]	GDB1 YPR184W	0.969886	0.581328	-1.28465	-0.266566	4-alpha-glucanotransferase activity;alpha-glucosidase activity;amylo-alpha-1,6-glucosidase activity;catalytic activity;glucosidase activity;glycogen debranching enzyme activity;hydrolase activity;hydrolase activity, acting on glycosyl bonds;hydrolase activity, hydrolyzing O-glycosyl compounds;transferase activity;transferase activity, transferring glycosyl groups;transferase activity, transferrin…	cell part;cytoplasmic part;intracellular membrane-bounded organelle;intracellular organelle;intracellular part;membrane-bounded organelle;mitochondrion;organelle	biosynthetic process;carbohydrate metabolic process;catabolic process;cellular metabolic process;cellular process;energy reserve metabolic process;generation of precursor metabolites and energy;macromolecule metabolic process;metabolic process;polysaccharide metabolic process;primary metabolic process	3	60	60	60	51.3	51.3	51.3	174.97	1536
P38625	GUAA_YEAST	GMP synthase [glutamine-hydrolyzing] (EC 6.3.5.2) (GMP synthetase) (Glutamine amidotransferase)	GUA1 YMR217W YM8261.11	0.915324	0.636221	-1.30197	-0.24958	adenyl nucleotide binding;adenyl ribonucleotide binding;ATP binding;binding;carbon-nitrogen ligase activity, with glutamine as amido-N-donor;catalytic activity;GMP synthase (glutamine-hydrolyzing) activity;hydrolase activity;hydrolase activity, acting on acid anhydrides;hydrolase activity, acting on acid anhydrides, in phosphorus-containing anhydrides;ligase activity;ligase activity, forming carb…	cell part;cytoplasm;intracellular part	amine metabolic process;biosynthetic process;cellular amino acid metabolic process;cellular ketone metabolic process;cellular metabolic process;cellular nitrogen compound metabolic process;cellular process;heterocycle metabolic process;metabolic process;nitrogen compound metabolic process;nucleobase-containing compound metabolic process;nucleobase-containing small molecule metabolic process;nucle…	3	33	33	33	67.4	67.4	67.4	58.482	525
P40024	ARB1_YEAST	ABC transporter ATP-binding protein ARB1 (ATP-binding cassette protein involved in ribosome biogenesis 1)	ARB1 YER036C	1.01453	0.557292	-1.2468	-0.325022	adenyl nucleotide binding;adenyl ribonucleotide binding;ATP binding;ATPase activity;ATPase activity, uncoupled;binding;catalytic activity;hydrolase activity;hydrolase activity, acting on acid anhydrides;hydrolase activity, acting on acid anhydrides, in phosphorus-containing anhydrides;nucleoside-triphosphatase activity;nucleotide binding;purine nucleotide binding;purine ribonucleoside triphosphat…	cell part;cytoplasm;intracellular membrane-bounded organelle;intracellular organelle;intracellular part;membrane-bounded organelle;nucleus;organelle	cellular localization;cellular process;establishment of localization;localization;metabolic process;nuclear transport;nucleocytoplasmic transport;ribosomal subunit export from nucleus;ribosome biogenesis;transport	3	31	31	31	56.4	56.4	56.4	68.376	610
P39958	GDI1_YEAST	Rab GDP-dissociation inhibitor (Rab GDI) (Secretory pathway GDP dissociation inhibitor)	GDI1 SEC19 YER136W	0.8743	0.681585	-1.3074	-0.248485	enzyme activator activity;enzyme regulator activity;GDP-dissociation inhibitor activity;GTPase activator activity;GTPase regulator activity;nucleoside-triphosphatase regulator activity;Rab GDP-dissociation inhibitor activity;small GTPase regulator activity	cell part;cytoplasm;intracellular part	biological regulation;cellular process;establishment of localization;protein transport;transport;vesicle-mediated transport	3	31	31	31	82	82	82	51.206	451
P08679	CISY2_YEAST	Citrate synthase, peroxisomal (EC 2.3.3.16)	CIT2 YCR005C YCR043 YCR5C	0.8806	0.673998	-1.30734	-0.24726	catalytic activity;citrate (Si)-synthase activity;transferase activity;transferase activity, transferring acyl groups;transferase activity, transferring acyl groups, acyl groups converted into alkyl on transfer	cell part;cytoplasmic part;intracellular membrane-bounded organelle;intracellular organelle;intracellular part;membrane-bounded organelle;microbody;organelle;peroxisome	amine metabolic process;biosynthetic process;carbohydrate metabolic process;catabolic process;cellular aldehyde metabolic process;cellular amino acid metabolic process;cellular ketone metabolic process;cellular metabolic process;cellular nitrogen compound metabolic process;cellular process;cofactor metabolic process;metabolic process;nitrogen compound metabolic process;organic acid metabolic proc…	3	30	28	27	69.6	63.7	61.3	51.413	460
P17505	MDHM_YEAST	Malate dehydrogenase, mitochondrial (EC 1.1.1.37)	MDH1 YKL085W	0.966945	0.575839	-1.29261	-0.250176	binding;catalytic activity;L-malate dehydrogenase activity;malate dehydrogenase activity;mRNA binding;nucleic acid binding;oxidoreductase activity;oxidoreductase activity, acting on CH-OH group of donors;oxidoreductase activity, acting on the CH-OH group of donors, NAD or NADP as acceptor;RNA binding	cell part;cytoplasmic part;intracellular membrane-bounded organelle;intracellular organelle;intracellular organelle lumen;intracellular organelle part;intracellular part;membrane-bounded organelle;membrane-enclosed lumen;mitochondrial matrix;mitochondrial part;mitochondrion;organelle;organelle lumen;organelle part	aging;carbohydrate metabolic process;catabolic process;cellular ketone metabolic process;cellular metabolic process;cellular process;cellular respiration;cofactor metabolic process;developmental process;generation of precursor metabolites and energy;metabolic process;organic acid metabolic process;primary metabolic process;small molecule metabolic process	3	27	27	27	77.2	77.2	77.2	35.65	334
P00927	THDH_YEAST	Threonine dehydratase, mitochondrial (EC 4.3.1.19) (Threonine deaminase)	ILV1 YER086W	0.991726	0.569605	-1.26706	-0.294274	ammonia-lyase activity;binding;carbon-nitrogen lyase activity;catalytic activity;cofactor binding;L-threonine ammonia-lyase activity;lyase activity;pyridoxal phosphate binding;vitamin B6 binding;vitamin binding	cell part;cytoplasmic part;intracellular membrane-bounded organelle;intracellular organelle;intracellular part;membrane-bounded organelle;mitochondrion;organelle	amine metabolic process;biosynthetic process;catabolic process;cellular amino acid metabolic process;cellular ketone metabolic process;cellular metabolic process;cellular nitrogen compound metabolic process;cellular process;metabolic process;nitrogen compound metabolic process;organic acid metabolic process;primary metabolic process;small molecule metabolic process	3	26	26	26	57.3	57.3	57.3	63.83	576
P02309	H4_YEAST	Histone H4	HHF1 YBR009C YBR0122; HHF2 YNL030W N2752	1.03733	0.43382	-1.30724	-0.163905	binding;DNA binding;nucleic acid binding	cell part;chromosomal part;intracellular organelle part;intracellular part;macromolecular complex;nuclear chromosome part;nuclear nucleosome;nuclear part;nucleosome;organelle part;protein complex;protein-DNA complex;replication fork protection complex	anatomical structure formation involved in morphogenesis;cell differentiation;cellular component assembly;cellular component organization;cellular macromolecular complex assembly;cellular metabolic process;cellular process;chromatin modification;chromatin organization;chromosome organization;developmental process;histone modification;macromolecular complex assembly;macromolecule metabolic process…	3	11	11	11	63.1	63.1	63.1	11.368	103
Q05775	EIF3J_YEAST	Eukaryotic translation initiation factor 3 subunit J (eIF3j) (Eukaryotic translation initiation factor 3 30 kDa subunit) (eIF-3 30 kDa)	HCR1 YLR192C L8167.11	1.02895	0.556249	-1.22585	-0.359351	binding;nucleic acid binding;RNA binding;translation factor activity, nucleic acid binding;translation initiation factor activity	cell part;cytoplasmic part;eukaryotic 43S preinitiation complex;eukaryotic 48S preinitiation complex;eukaryotic translation initiation factor 3 complex;intracellular part;macromolecular complex;protein complex;ribonucleoprotein complex;translation preinitiation complex	biological regulation;biosynthetic process;cellular component assembly;cellular component organization;cellular macromolecular complex assembly;cellular metabolic process;cellular nitrogen compound metabolic process;cellular process;cytoplasmic translation;macromolecular complex assembly;macromolecule metabolic process;metabolic process;nitrogen compound metabolic process;nucleobase-containing co…	3	17	17	17	58.9	58.9	58.9	29.564	265
Q03532	HAS1_YEAST	ATP-dependent RNA helicase HAS1 (EC 3.6.4.13) (Helicase associated with SET1 protein 1)	HAS1 YMR290C	1.12477	0.446039	-1.17413	-0.396676	adenyl nucleotide binding;adenyl ribonucleotide binding;ATP binding;ATPase activity;ATPase activity, coupled;ATP-dependent helicase activity;ATP-dependent RNA helicase activity;binding;catalytic activity;helicase activity;hydrolase activity;hydrolase activity, acting on acid anhydrides;hydrolase activity, acting on acid anhydrides, in phosphorus-containing anhydrides;nucleic acid binding;nucleosi…	cell part;envelope;intracellular non-membrane-bounded organelle;intracellular organelle;intracellular organelle part;intracellular part;macromolecular complex;non-membrane-bounded organelle;nuclear envelope;nuclear part;nucleolus;organelle;organelle envelope;organelle part;preribosome;preribosome, large subunit precursor;ribonucleoprotein complex	cellular metabolic process;cellular nitrogen compound metabolic process;cellular process;macromolecule metabolic process;metabolic process;nitrogen compound metabolic process;nucleobase-containing compound metabolic process;primary metabolic process;ribosomal large subunit biogenesis;ribosomal small subunit biogenesis;RNA metabolic process;RNA processing;rRNA processing	3	19	19	19	41.2	41.2	41.2	56.717	505
P32352	ERG2_YEAST	C-8 sterol isomerase (EC 5.-.-.-) (Delta-8--delta-7 sterol isomerase)	ERG2 YMR202W YM8325.03	1.24398	0.1913	-1.15691	-0.27837	C-8 sterol isomerase activity;catalytic activity;intramolecular oxidoreductase activity;intramolecular oxidoreductase activity, transposing C=C bonds;isomerase activity	cell part;cytoplasmic part;endoplasmic reticulum;endoplasmic reticulum membrane;endoplasmic reticulum part;integral to membrane;intracellular membrane-bounded organelle;intracellular organelle;intracellular organelle part;intracellular part;intrinsic to membrane;membrane;membrane part;membrane-bounded organelle;organelle;organelle membrane;organelle part	alcohol metabolic process;biosynthetic process;cellular metabolic process;cellular process;lipid metabolic process;metabolic process;primary metabolic process;small molecule metabolic process	3	4	4	4	22.5	22.5	22.5	24.895	222
P39721	AIM2_YEAST	Protein AIM2 (Altered inheritance rate of mitochondria protein 2)	AIM2 YAL049C	1.15832	0.37612	-1.17927	-0.355168	catalytic activity;hydrolase activity	cell part;cytoplasm;intracellular part		3	15	15	15	78	78	78	27.089	246
P32191	GPDM_YEAST	Glycerol-3-phosphate dehydrogenase, mitochondrial (GPD-M) (GPDH-M) (EC 1.1.5.3)	GUT2 YIL155C	0.830278	0.788942	-1.24393	-0.375286	catalytic activity;glycerol-3-phosphate dehydrogenase activity;oxidoreductase activity;oxidoreductase activity, acting on CH-OH group of donors;oxidoreductase activity, acting on the CH-OH group of donors, quinone or similar compound as acceptor;sn-glycerol-3-phosphate:ubiquinone oxidoreductase activity;sn-glycerol-3-phosphate:ubiquinone-8 oxidoreductase activity	cell part;cytoplasmic part;glycerol-3-phosphate dehydrogenase complex;integral to membrane;integral to mitochondrial membrane;integral to mitochondrial outer membrane;integral to organelle membrane;intracellular membrane-bounded organelle;intracellular organelle;intracellular organelle part;intracellular part;intrinsic to membrane;intrinsic to mitochondrial outer membrane;intrinsic to organelle m…	aging;alcohol metabolic process;carbohydrate metabolic process;catabolic process;cellular metabolic process;cellular nitrogen compound metabolic process;cellular process;cofactor metabolic process;developmental process;heterocycle metabolic process;metabolic process;nitrogen compound metabolic process;nucleobase-containing compound metabolic process;nucleobase-containing small molecule metabolic …	3	37	37	37	60.2	60.2	60.2	72.388	649
P47912	LCF4_YEAST	Long-chain-fatty-acid--CoA ligase 4 (EC 6.2.1.3) (Fatty acid activator 4) (Long-chain acyl-CoA synthetase 4)	FAA4 YMR246W YM9408.08	0.84036	0.798582	-1.21507	-0.423873	adenyl nucleotide binding;adenyl ribonucleotide binding;ATP binding;binding;catalytic activity;fatty acid ligase activity;ligase activity;ligase activity, forming carbon-sulfur bonds;long-chain fatty acid-CoA ligase activity;nucleotide binding;purine nucleotide binding;purine ribonucleoside triphosphate binding;purine ribonucleotide binding;ribonucleotide binding	cell part;cytoplasmic part;intracellular part;lipid particle	cellular ketone metabolic process;cellular lipid metabolic process;cellular metabolic process;cellular process;cofactor metabolic process;establishment of localization;lipid metabolic process;lipid transport;metabolic process;organic acid metabolic process;organic acid transport;primary metabolic process;small molecule metabolic process;transport	3	18	16	15	28.7	27.4	25.8	77.266	694
P31382	PMT2_YEAST	Dolichyl-phosphate-mannose--protein mannosyltransferase 2 (EC 2.4.1.109)	PMT2 FUN25 YAL023C	0.786427	0.838766	-1.23531	-0.38988	catalytic activity;dolichyl-phosphate-mannose-protein mannosyltransferase activity;mannosyltransferase activity;transferase activity;transferase activity, transferring glycosyl groups;transferase activity, transferring hexosyl groups	cell part;integral to membrane;intrinsic to membrane;membrane part	carbohydrate metabolic process;catabolic process;cellular metabolic process;cellular process;establishment of localization;macromolecule metabolic process;macromolecule modification;metabolic process;primary metabolic process;protein glycosylation;protein metabolic process;protein modification process;protein transport;proteolysis;proteolysis involved in cellular protein catabolic process;respons…	3	19	19	16	35.4	35.4	31.2	86.869	759
P15624	SYFB_YEAST	Phenylalanine--tRNA ligase beta subunit (EC 6.1.1.20) (Phenylalanyl-tRNA synthetase beta subunit) (PheRS)	FRS1 YLR060W L2165	0.662229	0.918607	-1.2742	-0.306634	adenyl nucleotide binding;adenyl ribonucleotide binding;aminoacyl-tRNA ligase activity;ATP binding;binding;catalytic activity;cation binding;ion binding;ligase activity;ligase activity, forming aminoacyl-tRNA and related compounds;ligase activity, forming carbon-oxygen bonds;magnesium ion binding;metal ion binding;nucleic acid binding;nucleotide binding;phenylalanine-tRNA ligase activity;purine n…	cell part;cytoplasmic part;intracellular part;macromolecular complex;phenylalanine-tRNA ligase complex;protein complex	amine metabolic process;cellular amino acid metabolic process;cellular ketone metabolic process;cellular metabolic process;cellular nitrogen compound metabolic process;cellular process;macromolecule metabolic process;metabolic process;nitrogen compound metabolic process;nucleobase-containing compound metabolic process;organic acid metabolic process;primary metabolic process;RNA metabolic process;…	3	34	34	34	66.1	66.1	66.1	67.364	595
P43588	RPN11_YEAST	Ubiquitin carboxyl-terminal hydrolase RPN11 (EC 3.4.19.12) (26S proteasome regulatory subunit RPN11) (Protein MPR1)	RPN11 MPR1 YFR004W	0.799763	0.757991	-1.31391	-0.24384	catalytic activity;cysteine-type peptidase activity;hydrolase activity;metallopeptidase activity;peptidase activity;peptidase activity, acting on L-amino acid peptides;small conjugating protein-specific protease activity;ubiquitin-specific protease activity	cell part;cytoplasmic part;cytosol;cytosolic part;cytosolic proteasome complex;intracellular membrane-bounded organelle;intracellular organelle;intracellular part;macromolecular complex;membrane-bounded organelle;mitochondrion;nucleus;organelle;proteasome complex;proteasome regulatory particle, lid subcomplex;proteasome storage granule;protein complex	catabolic process;cellular component organization;cellular metabolic process;cellular process;macromolecule metabolic process;macromolecule modification;metabolic process;mitochondrion organization;organelle fission;organelle organization;primary metabolic process;protein metabolic process;protein modification by small protein conjugation or removal;protein modification process;proteolysis;proteo…	3	16	16	16	53.3	53.3	53.3	34.398	306
P07263	SYH_YEAST	Histidine--tRNA ligase, mitochondrial (EC 6.1.1.21) (Histidyl-tRNA synthetase) (HisRS)	HTS1 YPR033C YP9367.13C	0.757404	0.840812	-1.26934	-0.328881	adenyl nucleotide binding;adenyl ribonucleotide binding;aminoacyl-tRNA ligase activity;ATP binding;binding;catalytic activity;histidine-tRNA ligase activity;ligase activity;ligase activity, forming aminoacyl-tRNA and related compounds;ligase activity, forming carbon-oxygen bonds;nucleotide binding;purine nucleotide binding;purine ribonucleoside triphosphate binding;purine ribonucleotide binding;r…	cell part;cytoplasm;cytoplasmic part;intracellular membrane-bounded organelle;intracellular organelle;intracellular part;membrane-bounded organelle;mitochondrion;organelle	amine metabolic process;biosynthetic process;cellular amino acid metabolic process;cellular component organization;cellular ketone metabolic process;cellular metabolic process;cellular nitrogen compound metabolic process;cellular process;macromolecule metabolic process;metabolic process;mitochondrial translation;mitochondrion organization;nitrogen compound metabolic process;nucleobase-containing …	3	31	31	31	58.4	58.4	58.4	59.952	546
P00958	SYMC_YEAST	Methionine--tRNA ligase, cytoplasmic (EC 6.1.1.10) (Methionyl-tRNA synthetase) (MetRS)	MES1 YGR264C	0.993141	0.648518	-1.17124	-0.470422	adenyl nucleotide binding;adenyl ribonucleotide binding;aminoacyl-tRNA ligase activity;ATP binding;binding;catalytic activity;ligase activity;ligase activity, forming aminoacyl-tRNA and related compounds;ligase activity, forming carbon-oxygen bonds;methionine-tRNA ligase activity;nucleotide binding;purine nucleotide binding;purine ribonucleoside triphosphate binding;purine ribonucleotide binding;…	cell part;cytoplasm;cytoplasmic part;intracellular part;macromolecular complex;methionyl glutamyl tRNA synthetase complex;protein complex	amine metabolic process;cellular amino acid metabolic process;cellular ketone metabolic process;cellular metabolic process;cellular nitrogen compound metabolic process;cellular process;macromolecule metabolic process;metabolic process;nitrogen compound metabolic process;nucleobase-containing compound metabolic process;organic acid metabolic process;primary metabolic process;RNA metabolic process;…	3	39	39	39	58.6	58.6	58.6	85.677	751
P24280	SEC14_YEAST	SEC14 cytosolic factor (Phosphatidylinositol/phosphatidylcholine transfer protein) (PI/PC TP)	SEC14 PIT1 YMR079W YM9582.04	0.909819	0.742073	-1.18454	-0.467348	lipid transporter activity;phosphatidylcholine transmembrane transporter activity;phosphatidylinositol transporter activity;phospholipid transporter activity;substrate-specific transporter activity;transporter activity	cell part;cytoplasm;cytoplasmic part;cytosol;Golgi apparatus;Golgi apparatus part;Golgi membrane;intracellular membrane-bounded organelle;intracellular organelle;intracellular organelle part;intracellular part;membrane;membrane-bounded organelle;organelle;organelle membrane;organelle part	anatomical structure development;anatomical structure formation involved in morphogenesis;ascospore formation;cell development;cell differentiation;cellular component organization;cellular lipid metabolic process;cellular membrane organization;cellular metabolic process;cellular process;developmental process;establishment of localization;Golgi vesicle transport;lipid metabolic process;lipid trans…	3	21	21	20	74.3	74.3	74.3	34.9	304
P25293	NAP1_YEAST	Nucleosome assembly protein	NAP1 YKR048C	0.953391	0.694828	-1.17762	-0.470593	binding;cyclin binding;DNA binding;enzyme activator activity;enzyme regulator activity;histone binding;identical protein binding;nucleic acid binding;protein binding	cell part;cellular bud neck;cytoplasm;intracellular membrane-bounded organelle;intracellular organelle;intracellular part;membrane-bounded organelle;nucleus;organelle;site of polarized growth	biological regulation;cellular component assembly;cellular component disassembly;cellular component organization;cellular macromolecular complex assembly;cellular process;chromatin organization;chromosome organization;establishment of localization;growth;macromolecular complex assembly;nuclear transport;nucleocytoplasmic transport;organelle organization;protein targeting;protein transport;regulat…	3	16	16	16	55.9	55.9	55.9	47.884	417
P38067	UGA2_YEAST	Succinate-semialdehyde dehydrogenase [NADP(+)] (SSDH) (EC 1.2.1.16)	UGA2 UGA5 YBR006W YBR0112	0.900652	0.761434	-1.16852	-0.493566	catalytic activity;oxidoreductase activity;oxidoreductase activity, acting on the aldehyde or oxo group of donors;oxidoreductase activity, acting on the aldehyde or oxo group of donors, NAD or NADP as acceptor;succinate-semialdehyde dehydrogenase [NAD(P)+] activity		amine metabolic process;catabolic process;cellular amino acid metabolic process;cellular ketone metabolic process;cellular metabolic process;cellular nitrogen compound metabolic process;cellular process;metabolic process;nitrogen compound metabolic process;organic acid metabolic process;primary metabolic process;response to chemical stimulus;response to oxidative stress;response to stimulus;respo…	3	16	16	16	50.9	50.9	50.9	54.189	497
P0CX85	RL35B_YEAST	60S ribosomal protein L35-B (Large ribosomal subunit protein uL29-B)	RPL35B SOS2 YDL136W D2170	0.868116	0.812591	-1.13504	-0.545664	structural constituent of ribosome;structural molecule activity	cell part;cytosolic large ribosomal subunit;intracellular organelle part;intracellular part;large ribosomal subunit;macromolecular complex;organelle part;preribosome;preribosome, large subunit precursor;ribonucleoprotein complex	biosynthetic process;cellular metabolic process;cellular nitrogen compound metabolic process;cellular process;cytoplasmic translation;macromolecule metabolic process;metabolic process;nitrogen compound metabolic process;nucleobase-containing compound metabolic process;primary metabolic process;protein metabolic process;RNA metabolic process;RNA processing;rRNA processing;translation	3	14	14	14	53.3	53.3	53.3	13.909	120
P20967	ODO1_YEAST	2-oxoglutarate dehydrogenase, mitochondrial (EC 1.2.4.2) (2-oxoglutarate dehydrogenase complex component E1) (OGDC-E1) (Alpha-ketoglutarate dehydrogenase)	KGD1 OGD1 YIL125W	0.934816	0.749142	-1.11313	-0.570828	binding;catalytic activity;coenzyme binding;cofactor binding;oxidoreductase activity;oxidoreductase activity, acting on the aldehyde or oxo group of donors;oxidoreductase activity, acting on the aldehyde or oxo group of donors, disulfide as acceptor;oxoglutarate dehydrogenase (succinyl-transferring) activity;thiamine pyrophosphate binding;vitamin binding	cell part;cytoplasmic part;intracellular non-membrane-bounded organelle;intracellular organelle;intracellular organelle part;intracellular part;macromolecular complex;mitochondrial nucleoid;mitochondrial oxoglutarate dehydrogenase complex;mitochondrial part;non-membrane-bounded organelle;nucleoid;organelle;organelle part;oxoglutarate dehydrogenase complex;protein complex	catabolic process;cellular ketone metabolic process;cellular metabolic process;cellular process;cofactor metabolic process;metabolic process;organic acid metabolic process;small molecule metabolic process	3	47	47	47	56.1	56.1	56.1	114.41	1014
P09624	DLDH_YEAST	Dihydrolipoyl dehydrogenase, mitochondrial (EC 1.8.1.4) (Dihydrolipoamide dehydrogenase) (Glycine decarboxylase complex subunit L) (Lipoamide dehydrogenase component of pyruvate dehydrogenase complex) (Pyruvate dehydrogenase complex E3 component)	LPD1 DHLP1 YFL018C	0.893442	0.774711	-1.15828	-0.509874	binding;catalytic activity;coenzyme binding;cofactor binding;dihydrolipoyl dehydrogenase activity;flavin adenine dinucleotide binding;glycine dehydrogenase (decarboxylating) activity;oxidoreductase activity;oxidoreductase activity, acting on a sulfur group of donors;oxidoreductase activity, acting on a sulfur group of donors, NAD or NADP as acceptor;oxidoreductase activity, acting on NADH or NADP…	cell part;cytoplasmic part;glycine cleavage complex;intracellular non-membrane-bounded organelle;intracellular organelle;intracellular organelle part;intracellular part;macromolecular complex;mitochondrial nucleoid;mitochondrial oxoglutarate dehydrogenase complex;mitochondrial part;mitochondrial pyruvate dehydrogenase complex;non-membrane-bounded organelle;nucleoid;organelle;organelle part;oxoglu…	amine metabolic process;biological regulation;biosynthetic process;catabolic process;cellular amino acid metabolic process;cellular homeostasis;cellular ketone metabolic process;cellular metabolic process;cellular nitrogen compound metabolic process;cellular process;homeostatic process;metabolic process;nitrogen compound metabolic process;organic acid metabolic process;primary metabolic process;s…	3	38	38	38	79.2	79.2	79.2	54.009	499
P40037	HMF1_YEAST	Protein HMF1 (High dosage growth inhibitor) (Homologous mitochondrial matrix factor 1)	HMF1 HIG1 YER057C	0.84194	0.838573	-1.13679	-0.543718	catalytic activity;deaminase activity	cell part;cytoplasm;cytoplasmic part;cytosol;intracellular membrane-bounded organelle;intracellular organelle;intracellular organelle part;intracellular part;membrane-bounded organelle;membrane-enclosed lumen;mitochondrial intermembrane space;mitochondrial part;nucleus;organelle;organelle envelope lumen;organelle part		3	8	8	8	96.9	96.9	96.9	13.906	129
Q12068	GRE2_YEAST	NADPH-dependent methylglyoxal reductase GRE2 (EC 1.1.1.283) (3-methylbutanal reductase) (EC 1.1.1.265) (Genes de respuesta a estres protein 2) (Isovaleraldehyde reductase)	GRE2 YOL151W	0.880134	0.812234	-1.10462	-0.587745	3-methylbutanol:NAD(P) oxidoreductase activity;alcohol dehydrogenase [NAD(P)+] activity;binding;catalytic activity;coenzyme binding;cofactor binding;methylglyoxal reductase (NADPH-dependent) activity;oxidoreductase activity;oxidoreductase activity, acting on CH-OH group of donors;oxidoreductase activity, acting on the CH-OH group of donors, NAD or NADP as acceptor	cell part;cytoplasm;intracellular membrane-bounded organelle;intracellular organelle;intracellular part;membrane-bounded organelle;nucleus;organelle	alcohol metabolic process;cellular metabolic process;cellular process;filamentous growth;growth;lipid metabolic process;metabolic process;primary metabolic process;small molecule metabolic process	3	25	25	25	72.8	72.8	72.8	38.169	342
P40302	PSA6_YEAST	Proteasome subunit alpha type-6 (EC 3.4.25.1) (Macropain subunit PRE5) (Multicatalytic endopeptidase complex subunit PRE5) (Proteasome component PRE5) (Proteinase YSCE subunit PRE5)	PRE5 YMR314W YM9924.06	0.850075	0.813227	-1.17279	-0.490515	catalytic activity;endopeptidase activity;hydrolase activity;peptidase activity;peptidase activity, acting on L-amino acid peptides;threonine-type endopeptidase activity;threonine-type peptidase activity	cell part;cytoplasm;cytoplasmic part;cytosolic part;cytosolic proteasome complex;intracellular membrane-bounded organelle;intracellular organelle;intracellular part;macromolecular complex;membrane;membrane part;membrane-bounded organelle;nuclear outer membrane-endoplasmic reticulum membrane network;nucleus;organelle;proteasome complex;proteasome core complex, alpha-subunit complex;proteasome stor…	catabolic process;cellular metabolic process;cellular process;macromolecule metabolic process;metabolic process;primary metabolic process;protein metabolic process;proteolysis;proteolysis involved in cellular protein catabolic process	3	16	16	16	73.9	73.9	73.9	25.604	234
P32316	ACH1_YEAST	Acetyl-CoA hydrolase (EC 3.1.2.1) (Acetyl-CoA deacylase) (Acetyl-CoA acylase)	ACH1 YBL015W YBL03.18 YBL0304	0.769577	0.89245	-1.17022	-0.49181	acetate CoA-transferase activity;acetyl-CoA hydrolase activity;catalytic activity;CoA hydrolase activity;CoA-transferase activity;hydrolase activity;hydrolase activity, acting on ester bonds;thiolester hydrolase activity;transferase activity;transferase activity, transferring sulfur-containing groups	cell part;cytoplasmic part;cytosol;intracellular membrane-bounded organelle;intracellular organelle;intracellular part;membrane-bounded organelle;mitochondrion;organelle	cellular ketone metabolic process;cellular metabolic process;cellular process;cofactor metabolic process;metabolic process;organic acid metabolic process;small molecule metabolic process	3	41	41	41	76.4	76.4	76.4	58.711	526
P40069	IMB4_YEAST	Importin subunit beta-4 (Importin-123) (Karyopherin subunit beta-4) (Karyopherin-123) (Ran-binding protein YRB4)	KAP123 YRB4 YER110C	0.794112	0.910612	-1.06108	-0.64364	binding;nuclear localization sequence binding;peptide binding;protein transporter activity;signal sequence binding;substrate-specific transporter activity;transporter activity	cell part;cytoplasm;intracellular membrane-bounded organelle;intracellular organelle;intracellular organelle part;intracellular part;macromolecular complex;membrane part;membrane-bounded organelle;nuclear part;nuclear pore;nucleus;organelle;organelle part;pore complex;protein complex	biological regulation;establishment of localization;nuclear transport;nucleobase-containing compound transport;nucleocytoplasmic transport;protein targeting;protein transport;transport	3	45	45	45	57	57	57	122.6	1113
P11412	G6PD_YEAST	Glucose-6-phosphate 1-dehydrogenase (G6PD) (EC 1.1.1.49)	ZWF1 MET19 YNL241C N1110	0.839157	0.864095	-1.07369	-0.629566	binding;catalytic activity;coenzyme binding;cofactor binding;glucose-6-phosphate dehydrogenase activity;NADP binding;nucleotide binding;oxidoreductase activity;oxidoreductase activity, acting on CH-OH group of donors;oxidoreductase activity, acting on the CH-OH group of donors, NAD or NADP as acceptor		alcohol metabolic process;carbohydrate metabolic process;cellular metabolic process;cellular nitrogen compound metabolic process;cellular process;cofactor metabolic process;heterocycle metabolic process;metabolic process;nitrogen compound metabolic process;nucleobase-containing compound metabolic process;nucleobase-containing small molecule metabolic process;nucleotide metabolic process;primary m…	3	36	36	36	74.1	74.1	74.1	57.521	505
P33331	NTF2_YEAST	Nuclear transport factor 2 (NTF-2) (Nuclear transport factor P10)	NTF2 YER009W	0.792296	0.897648	-1.10816	-0.58178	binding;enzyme binding;GTPase binding;protein binding;Ran GTPase binding;Ras GTPase binding;small GTPase binding	cell part;cytoplasm;envelope;intracellular organelle part;intracellular part;nuclear envelope;nuclear part;organelle envelope;organelle part	establishment of localization;nuclear transport;nucleocytoplasmic transport;protein targeting;protein transport;transport	3	5	5	5	56	56	56	14.453	125
P40327	PRS4_YEAST	26S protease regulatory subunit 4 homolog (Tat-binding homolog 5)	RPT2 YHS4 YTA5 YDL007W D2920	0.834225	0.8629	-1.09285	-0.60427	adenyl nucleotide binding;adenyl ribonucleotide binding;ATP binding;ATPase activity;binding;catalytic activity;hydrolase activity;hydrolase activity, acting on acid anhydrides;hydrolase activity, acting on acid anhydrides, in phosphorus-containing anhydrides;nucleoside-triphosphatase activity;nucleotide binding;purine nucleotide binding;purine ribonucleoside triphosphate binding;purine ribonucleo…	cell part;cytoplasm;intracellular membrane-bounded organelle;intracellular organelle;intracellular part;macromolecular complex;membrane-bounded organelle;nucleus;organelle;proteasome regulatory particle, base subcomplex;protein complex	biological regulation;catabolic process;cellular component assembly;cellular component organization;cellular macromolecular complex assembly;cellular metabolic process;cellular nitrogen compound metabolic process;cellular process;localization;macromolecular complex assembly;macromolecule metabolic process;metabolic process;nitrogen compound metabolic process;nucleobase-containing compound metabol…	3	24	24	24	70	70	70	48.828	437
P22515	UBA1_YEAST	Ubiquitin-activating enzyme E1 1 (EC 6.2.1.45)	UBA1 YKL210W	0.886069	0.83054	-1.0191	-0.697506	adenyl nucleotide binding;adenyl ribonucleotide binding;ATP binding;binding;catalytic activity;nucleotide binding;purine nucleotide binding;purine ribonucleoside triphosphate binding;purine ribonucleotide binding;ribonucleotide binding;small protein activating enzyme activity;ubiquitin activating enzyme activity	cell part;cytoplasm;intracellular membrane-bounded organelle;intracellular organelle;intracellular part;membrane-bounded organelle;nucleus;organelle	cellular metabolic process;cellular process;macromolecule metabolic process;macromolecule modification;metabolic process;primary metabolic process;protein metabolic process;protein modification by small protein conjugation or removal;protein modification process	3	65	65	65	75.8	75.8	75.8	114.26	1024
P04050	RPB1_YEAST	DNA-directed RNA polymerase II subunit RPB1 (RNA polymerase II subunit 1) (RNA polymerase II subunit B1) (EC 2.7.7.6) (DNA-directed RNA polymerase III largest subunit) (RNA polymerase II subunit B220)	RPO21 RPB1 RPB220 SUA8 YDL140C D2150	0.927518	0.772979	-1.06976	-0.630739	binding;catalytic activity;cation binding;DNA binding;DNA-directed RNA polymerase activity;ion binding;metal ion binding;nucleic acid binding;nucleotidyltransferase activity;RNA polymerase activity;transferase activity;transferase activity, transferring phosphorus-containing groups	cell part;DNA-directed RNA polymerase complex;DNA-directed RNA polymerase II, core complex;intracellular membrane-bounded organelle;intracellular organelle;intracellular organelle part;intracellular part;macromolecular complex;membrane-bounded organelle;nuclear DNA-directed RNA polymerase complex;nuclear part;nucleoplasm part;nucleus;organelle;organelle part;protein complex;RNA polymerase complex	biosynthetic process;cellular metabolic process;cellular nitrogen compound metabolic process;cellular process;DNA metabolic process;DNA repair;macromolecule metabolic process;metabolic process;nitrogen compound metabolic process;nucleobase-containing compound metabolic process;primary metabolic process;response to DNA damage stimulus;response to stimulus;response to stress;RNA metabolic process;t…	3	55	55	54	38.3	38.3	37.8	191.61	1733
P38695	HXT5_YEAST	Probable glucose transporter HXT5	HXT5 YHR096C	0.947075	0.755302	-1.05555	-0.646829	carbohydrate transmembrane transporter activity;fructose transmembrane transporter activity;glucose transmembrane transporter activity;hexose transmembrane transporter activity;mannose transmembrane transporter activity;monosaccharide transmembrane transporter activity;substrate-specific transmembrane transporter activity;substrate-specific transporter activity;sugar transmembrane transporter act…	cell part;integral to membrane;intrinsic to membrane;membrane;membrane part;plasma membrane	carbohydrate transport;establishment of localization;transport	3	19	16	13	39	34.3	32.1	66.251	592
P32496	RPN12_YEAST	26S proteasome regulatory subunit RPN12 (Nuclear integrity protein 1)	RPN12 NIN1 YFR052W	0.93941	0.769729	-1.03408	-0.675063		cell part;cytoplasmic part;cytosolic part;cytosolic proteasome complex;intracellular part;macromolecular complex;proteasome complex;proteasome regulatory particle, lid subcomplex;proteasome storage granule;protein complex	catabolic process;cellular metabolic process;cellular process;macromolecule metabolic process;metabolic process;primary metabolic process;protein metabolic process;proteolysis;proteolysis involved in cellular protein catabolic process	3	14	14	14	57.7	57.7	57.7	31.919	274
P50085	PHB2_YEAST	Prohibitin-2	PHB2 YGR231C G8561	0.902331	0.808368	-1.04122	-0.669485		cell part;cytoplasmic part;integral to membrane;intracellular membrane-bounded organelle;intracellular organelle;intracellular organelle part;intracellular part;intrinsic to membrane;membrane;membrane part;membrane-bounded organelle;mitochondrial inner membrane;mitochondrial membrane;mitochondrial part;mitochondrion;organelle;organelle inner membrane;organelle membrane;organelle part	aging;biological regulation;cellular component organization;cellular localization;cellular metabolic process;cellular process;developmental process;localization;macromolecule metabolic process;metabolic process;mitochondrion organization;organelle inheritance;organelle localization;organelle organization;primary metabolic process;protein folding;protein metabolic process	3	14	14	14	49	49	49	34.406	310
Q07653	HBT1_YEAST	Protein HBT1 (HUB1 target protein 1)	HBT1 Crem YDL223C	1.02575	0.685493	-0.938511	-0.772737		cell part;cell projection;cytoplasm;intracellular part;mating projection	anatomical structure morphogenesis;biological regulation;cell morphogenesis;cellular component morphogenesis;cellular component organization;cellular process;developmental process	3	66	66	66	71.5	71.5	71.5	113.61	1046
P43619	NADC_YEAST	Nicotinate-nucleotide pyrophosphorylase [carboxylating] (EC 2.4.2.19) (Quinolinate phosphoribosyltransferase [decarboxylating]) (QAPRTase)	BNA6 QPT1 YFR047C	1.05305	0.64766	-0.96308	-0.73763	binding;catalytic activity;identical protein binding;nicotinate-nucleotide diphosphorylase (carboxylating) activity;protein binding;transferase activity;transferase activity, transferring glycosyl groups;transferase activity, transferring pentosyl groups	cell part;cytoplasm;intracellular membrane-bounded organelle;intracellular organelle;intracellular part;membrane-bounded organelle;nucleus;organelle	biosynthetic process;cellular metabolic process;cellular nitrogen compound metabolic process;cellular process;cofactor metabolic process;heterocycle metabolic process;metabolic process;nitrogen compound metabolic process;nucleobase-containing compound metabolic process;nucleobase-containing small molecule metabolic process;nucleotide metabolic process;primary metabolic process;small molecule meta…	3	14	14	14	56.3	56.3	56.3	32.365	295
P39079	TCPZ_YEAST	T-complex protein 1 subunit zeta (TCP-1-zeta) (CCT-zeta)	CCT6 TCP20 TCP6 YDR188W YD9395.21	1.03305	0.667249	-0.995209	-0.705088	adenyl nucleotide binding;adenyl ribonucleotide binding;ATP binding;binding;nucleotide binding;protein binding;purine nucleotide binding;purine ribonucleoside triphosphate binding;purine ribonucleotide binding;ribonucleotide binding;unfolded protein binding	cell part;chaperonin-containing T-complex;cytoplasmic part;cytosolic part;intracellular part;macromolecular complex;protein complex	cellular metabolic process;cellular process;macromolecule metabolic process;metabolic process;primary metabolic process;protein folding;protein metabolic process	3	25	25	25	62.6	62.6	62.6	59.923	546
P00127	QCR6_YEAST	Cytochrome b-c1 complex subunit 6 (Complex III subunit 6) (Complex III subunit VI) (Cytochrome c1 non-heme 17 kDa protein) (Mitochondrial hinge protein) (Ubiquinol-cytochrome c reductase complex 17 kDa protein)	QCR6 UCR6 YFR033C	1.12217	0.561319	-0.907215	-0.776278	catalytic activity;cation transmembrane transporter activity;hydrogen ion transmembrane transporter activity;inorganic cation transmembrane transporter activity;ion transmembrane transporter activity;monovalent inorganic cation transmembrane transporter activity;oxidoreductase activity;oxidoreductase activity, acting on diphenols and related substances as donors;oxidoreductase activity, acting on…	cell part;cytoplasmic part;intracellular organelle part;intracellular part;macromolecular complex;membrane part;membrane-enclosed lumen;mitochondrial intermembrane space;mitochondrial membrane part;mitochondrial part;mitochondrial respiratory chain complex III;organelle envelope lumen;organelle part;protein complex;respiratory chain complex III	cellular metabolic process;cellular process;cellular respiration;generation of precursor metabolites and energy;metabolic process	3	2	2	2	32	32	32	17.257	147
P53066	YGZ2_YEAST	Ankyrin repeat-containing protein YGL242C	YGL242C HRE181	1.14248	0.531303	-0.913274	-0.760512				3	9	9	9	64.1	64.1	64.1	20.073	181
P40043	RGI1_YEAST	Respiratory growth induced protein 1	RGI1 YER067W	1.08685	0.612056	-0.871761	-0.827147		cell part;cell periphery;membrane;plasma membrane	cellular metabolic process;cellular process;energy reserve metabolic process;generation of precursor metabolites and energy;metabolic process	3	8	8	8	69.6	69.6	69.6	18.989	161
P34227	PRX1_YEAST	Mitochondrial peroxiredoxin PRX1 (EC 1.11.1.15) (1-Cys PRX) (Mitochondrial thiol peroxidase) (mTPx) (Thioredoxin reductase)	PRX1 YBL064C YBL0503 YBL0524	1.05903	0.647201	-0.897646	-0.808588	antioxidant activity;catalytic activity;oxidoreductase activity;oxidoreductase activity, acting on paired donors, with incorporation or reduction of molecular oxygen;oxidoreductase activity, acting on peroxide as acceptor;peroxidase activity;peroxiredoxin activity;thioredoxin peroxidase activity	cell part;cytoplasmic part;intracellular membrane-bounded organelle;intracellular organelle;intracellular part;membrane-bounded organelle;mitochondrion;organelle	biological regulation;cellular homeostasis;cellular process;homeostatic process;response to chemical stimulus;response to oxidative stress;response to stimulus;response to stress	3	19	19	19	62.5	62.5	62.5	29.495	261
P28707	SBA1_YEAST	Co-chaperone protein SBA1	SBA1 YKL117W YKL518	0.912699	0.811028	-0.970479	-0.753248	binding;chaperone binding;protein binding	cell part;cytoplasm;intracellular membrane-bounded organelle;intracellular organelle;intracellular part;membrane-bounded organelle;nucleus;organelle	biological regulation;cellular metabolic process;cellular process;macromolecule metabolic process;metabolic process;primary metabolic process;protein folding;protein metabolic process;regulation of DNA metabolic process;regulation of organelle organization	3	7	7	7	29.6	29.6	29.6	24.081	216
P30902	ATP7_YEAST	ATP synthase subunit d, mitochondrial	ATP7 YKL016C	0.981247	0.738701	-0.9386	-0.781348	cation transmembrane transporter activity;hydrogen ion transmembrane transporter activity;inorganic cation transmembrane transporter activity;ion transmembrane transporter activity;monovalent inorganic cation transmembrane transporter activity;substrate-specific transmembrane transporter activity;substrate-specific transporter activity;transmembrane transporter activity;transporter activity	cell part;cytoplasmic part;intracellular organelle part;intracellular part;macromolecular complex;membrane part;mitochondrial membrane part;mitochondrial part;mitochondrial proton-transporting ATP synthase, stator stalk;organelle part;protein complex;proton-transporting ATP synthase, stator stalk	biosynthetic process;cellular metabolic process;cellular nitrogen compound metabolic process;cellular process;establishment of localization;heterocycle metabolic process;hydrogen transport;ion transport;metabolic process;nitrogen compound metabolic process;nucleobase-containing compound metabolic process;nucleobase-containing small molecule metabolic process;nucleotide metabolic process;primary m…	3	21	21	21	81	81	81	19.809	174
P53852	SYC_YEAST	Cysteine--tRNA ligase (EC 6.1.1.16) (Cysteinyl-tRNA synthetase) (CysRS)	YNL247W N0885	0.909184	0.820372	-0.913212	-0.816344	adenyl nucleotide binding;adenyl ribonucleotide binding;aminoacyl-tRNA ligase activity;ATP binding;binding;catalytic activity;cation binding;cysteine-tRNA ligase activity;ion binding;ligase activity;ligase activity, forming aminoacyl-tRNA and related compounds;ligase activity, forming carbon-oxygen bonds;metal ion binding;nucleotide binding;purine nucleotide binding;purine ribonucleoside triphosp…		amine metabolic process;cellular amino acid metabolic process;cellular ketone metabolic process;cellular metabolic process;cellular nitrogen compound metabolic process;cellular process;macromolecule metabolic process;metabolic process;nitrogen compound metabolic process;nucleobase-containing compound metabolic process;organic acid metabolic process;primary metabolic process;RNA metabolic process;…	3	43	43	43	60.8	60.8	60.8	87.529	767
P52489	KPYK2_YEAST	Pyruvate kinase 2 (PK 2) (EC 2.7.1.40)	PYK2 YOR347C O6342	0.91362	0.815425	-0.917367	-0.811677	adenyl nucleotide binding;adenyl ribonucleotide binding;alkali metal ion binding;ATP binding;binding;catalytic activity;cation binding;ion binding;kinase activity;magnesium ion binding;metal ion binding;nucleotide binding;phosphotransferase activity, alcohol group as acceptor;potassium ion binding;purine nucleotide binding;purine ribonucleoside triphosphate binding;purine ribonucleotide binding;p…	cell part;cytoplasmic part;intracellular membrane-bounded organelle;intracellular organelle;intracellular part;membrane-bounded organelle;mitochondrion;organelle	alcohol metabolic process;carbohydrate metabolic process;catabolic process;cellular ketone metabolic process;cellular metabolic process;cellular process;generation of precursor metabolites and energy;metabolic process;organic acid metabolic process;primary metabolic process;small molecule metabolic process	3	27	23	23	60.3	55.3	55.3	55.195	506
P31383	2AAA_YEAST	Protein phosphatase PP2A regulatory subunit A (PR65)	TPD3 YAL016W FUN32	0.929731	0.799853	-0.871993	-0.857592		cell part;cell projection part;cellular bud neck;cellular bud tip;cytoplasm;cytoplasmic part;cytoskeletal part;intracellular membrane-bounded organelle;intracellular organelle;intracellular organelle part;intracellular part;macromolecular complex;mating projection tip;membrane-bounded organelle;microtubule organizing center;nucleus;organelle;organelle part;protein complex;protein phosphatase type…	biological regulation;cellular metabolic process;cellular process;metabolic process;phosphorus metabolic process;regulation of cell cycle;regulation of mitotic cell cycle;regulation of organelle organization;regulation of translation	3	27	27	27	46	46	46	70.907	635
P01120	RAS2_YEAST	Ras-like protein 2	RAS2 ASC1 CTN5 GLC5 YNL098C N2198	0.893333	0.836617	-0.918192	-0.811759	binding;catalytic activity;GTP binding;GTPase activity;guanyl nucleotide binding;guanyl ribonucleotide binding;hydrolase activity;hydrolase activity, acting on acid anhydrides;hydrolase activity, acting on acid anhydrides, in phosphorus-containing anhydrides;nucleoside-triphosphatase activity;nucleotide binding;purine nucleotide binding;purine ribonucleoside triphosphate binding;purine ribonucleo…	cell part;cytoplasmic part;endoplasmic reticulum membrane;endoplasmic reticulum part;intracellular membrane-bounded organelle;intracellular organelle;intracellular organelle part;intracellular part;membrane;membrane part;membrane-bounded organelle;mitochondrion;nucleus;organelle;organelle membrane;organelle part;plasma membrane	aging;anatomical structure development;anatomical structure formation involved in morphogenesis;ascospore formation;biological regulation;cell communication;cell development;cell differentiation;cellular process;developmental process;metabolic process;reproduction;response to chemical stimulus;response to external stimulus;response to extracellular stimulus;response to stimulus;signal transductio…	3	20	20	20	71.7	71.7	71.7	34.705	322
P38079	YRO2_YEAST	Protein YRO2	YRO2 YBR054W YBR0507	0.884881	0.84654	-0.892597	-0.838824		cell part;integral to membrane;intrinsic to membrane;membrane;membrane part;plasma membrane		3	10	6	6	20.3	10.8	10.8	38.719	344
Q12314	SFM1_YEAST	Protein arginine N-methyltransferase SFM1 (EC 2.1.1.-) (SPOUT family methyltransferase 1)	SFM1 YOR021C OR26.11	0.916111	0.813341	-0.907809	-0.821644	arginine N-methyltransferase activity;catalytic activity;methyltransferase activity;N-methyltransferase activity;protein methyltransferase activity;protein-arginine N-methyltransferase activity;protein-arginine omega-N monomethyltransferase activity;S-adenosylmethionine-dependent methyltransferase activity;transferase activity;transferase activity, transferring one-carbon groups	cell part;cytoplasm;intracellular part	cellular metabolic process;cellular process;macromolecule metabolic process;macromolecule modification;metabolic process;one-carbon metabolic process;peptidyl-amino acid modification;primary metabolic process;protein alkylation;protein metabolic process;protein modification process;small molecule metabolic process	3	16	16	16	70	70	70	24.743	213
P39683	NPT1_YEAST	Nicotinate phosphoribosyltransferase (NAPRTase) (EC 6.3.4.21)	NPT1 YOR209C	1.02972	0.68455	-0.827842	-0.886426	catalytic activity;ligase activity;nicotinate phosphoribosyltransferase activity;nicotinate-nucleotide diphosphorylase (carboxylating) activity;transferase activity;transferase activity, transferring glycosyl groups;transferase activity, transferring pentosyl groups	cell part;cytoplasm;intracellular membrane-bounded organelle;intracellular organelle;intracellular part;membrane-bounded organelle;nucleus;organelle	aging;biological regulation;biosynthetic process;cellular metabolic compound salvage;cellular metabolic process;cellular nitrogen compound metabolic process;cellular process;cofactor metabolic process;developmental process;gene silencing;heterocycle metabolic process;metabolic process;nitrogen compound metabolic process;nucleobase-containing compound metabolic process;nucleobase-containing small …	3	33	33	33	70.9	70.9	70.9	49.018	429
P22217	TRX1_YEAST	Thioredoxin-1 (Thioredoxin I) (TR-I) (Thioredoxin-2)	TRX1 TRX2 YLR043C	0.997373	0.723678	-0.844244	-0.876806	catalytic activity;disulfide oxidoreductase activity;oxidoreductase activity;oxidoreductase activity, acting on a sulfur group of donors;protein disulfide oxidoreductase activity	cell part;cytoplasmic part;cytosol;fungal-type vacuole;Golgi apparatus part;Golgi membrane;intracellular membrane-bounded organelle;intracellular organelle;intracellular organelle part;intracellular part;lytic vacuole;membrane;membrane-bounded organelle;membrane-enclosed lumen;mitochondrial intermembrane space;mitochondrial part;nucleus;organelle;organelle envelope lumen;organelle membrane;organe…	biological regulation;biosynthetic process;cellular component organization;cellular homeostasis;cellular membrane organization;cellular metabolic process;cellular nitrogen compound metabolic process;cellular process;establishment of localization;glycerol ether metabolic process;Golgi vesicle transport;homeostatic process;macromolecule metabolic process;macromolecule modification;membrane fusion;m…	3	10	8	8	72.8	55.3	55.3	11.235	103
P32891	DLD1_YEAST	D-lactate dehydrogenase [cytochrome] 1, mitochondrial (EC 1.1.2.4) (D-lactate ferricytochrome C oxidoreductase) (D-LCR)	DLD1 DLD YDL174C	0.964465	0.761064	-0.832239	-0.89329	binding;catalytic activity;coenzyme binding;cofactor binding;D-lactate dehydrogenase (cytochrome) activity;flavin adenine dinucleotide binding;lactate dehydrogenase activity;oxidoreductase activity;oxidoreductase activity, acting on CH-OH group of donors;oxidoreductase activity, acting on the CH-OH group of donors, cytochrome as acceptor;oxidoreductase activity, acting on the CH-OH group of donor…	cell part;cytoplasmic part;intracellular membrane-bounded organelle;intracellular organelle;intracellular organelle part;intracellular part;membrane;membrane-bounded organelle;membrane-enclosed lumen;mitochondrial inner membrane;mitochondrial intermembrane space;mitochondrial membrane;mitochondrial part;mitochondrion;organelle;organelle envelope lumen;organelle inner membrane;organelle membrane;o…	carbohydrate metabolic process;cellular metabolic process;cellular process;cellular respiration;generation of precursor metabolites and energy;metabolic process;primary metabolic process	3	30	30	30	59.5	59.5	59.5	65.292	587
P21243	PSA1_YEAST	Proteasome subunit alpha type-1 (EC 3.4.25.1) (Macropain subunit C7-alpha) (Multicatalytic endopeptidase complex C7) (Proteasome component C7-alpha) (Proteasome component Y8) (Proteinase YSCE subunit 7) (SCL1 suppressor protein)	SCL1 PRC2 PRS2 YGL011C	1.12085	0.509031	-1.0945	-0.535384	catalytic activity;endopeptidase activity;hydrolase activity;peptidase activity;peptidase activity, acting on L-amino acid peptides;threonine-type endopeptidase activity;threonine-type peptidase activity	cell part;cytoplasm;cytoplasmic part;cytosolic part;cytosolic proteasome complex;intracellular membrane-bounded organelle;intracellular organelle;intracellular part;macromolecular complex;membrane;membrane part;membrane-bounded organelle;nuclear outer membrane-endoplasmic reticulum membrane network;nucleus;organelle;proteasome complex;proteasome core complex, alpha-subunit complex;proteasome stor…	catabolic process;cellular metabolic process;cellular process;macromolecule metabolic process;metabolic process;primary metabolic process;protein metabolic process;proteolysis;proteolysis involved in cellular protein catabolic process	3	21	21	21	75.8	75.8	75.8	28.001	252
P36060	MCR1_YEAST	NADH-cytochrome b5 reductase 2 (EC 1.6.2.2) (Mitochondrial cytochrome b reductase) (p34/p32) [Cleaved into: NADH-cytochrome b5 reductase p34 form; NADH-cytochrome b5 reductase p32 form]	MCR1 YKL150W YKL605	1.14793	0.46312	-1.0971	-0.513949	catalytic activity;cytochrome-b5 reductase activity;oxidoreductase activity;oxidoreductase activity, acting on NADH or NADPH;oxidoreductase activity, acting on NADH or NADPH, heme protein as acceptor	cell part;cytoplasmic part;integral to membrane;integral to mitochondrial membrane;integral to mitochondrial outer membrane;integral to organelle membrane;intracellular organelle part;intracellular part;intrinsic to membrane;intrinsic to mitochondrial outer membrane;intrinsic to organelle membrane;membrane;membrane part;membrane-enclosed lumen;mitochondrial intermembrane space;mitochondrial membr…	alcohol metabolic process;biosynthetic process;cellular metabolic process;cellular process;lipid metabolic process;metabolic process;primary metabolic process;response to chemical stimulus;response to oxidative stress;response to stimulus;response to stress;small molecule metabolic process	3	23	23	23	79.5	79.5	79.5	34.137	302
P38230	QOR_YEAST	Probable quinone oxidoreductase (EC 1.6.5.5) (NADPH:quinone reductase)	ZTA1 YBR046C YBR0421	0.995127	0.665632	-1.13664	-0.524114	2-alkenal reductase [NAD(P)] activity;AU-rich element binding;binding;catalytic activity;cation binding;ion binding;metal ion binding;NADPH:quinone reductase activity;nucleic acid binding;oxidoreductase activity;oxidoreductase activity, acting on NADH or NADPH;oxidoreductase activity, acting on NADH or NADPH, quinone or similar compound as acceptor;oxidoreductase activity, acting on the CH-CH gro…		cellular process;response to chemical stimulus;response to oxidative stress;response to stimulus;response to stress	3	22	22	22	63.2	63.2	63.2	37.018	334
P39926	SSO2_YEAST	Protein SSO2	SSO2 YMR183C YM8010.13C	1.0769	0.573739	-1.0981	-0.55254	binding;lipid binding;phosphatidic acid binding;phospholipid binding;protein binding;SNAP receptor activity	cell part;integral to membrane;intrinsic to membrane;membrane;membrane part;plasma membrane;prospore membrane	anatomical structure formation involved in morphogenesis;cellular component assembly;cellular component organization;cellular membrane organization;cellular process;developmental process;establishment of localization;Golgi vesicle transport;membrane fusion;membrane organization;organelle fusion;organelle organization;protein transport;transport;vesicle organization;vesicle-mediated transport	3	14	14	12	63.4	63.4	57.3	33.733	295
P09201	F16P_YEAST	Fructose-1,6-bisphosphatase (FBPase) (EC 3.1.3.11) (D-fructose-1,6-bisphosphate 1-phosphohydrolase)	FBP1 YLR377C L8039.18	1.04872	0.607265	-1.11109	-0.544897	binding;carbohydrate phosphatase activity;catalytic activity;cation binding;fructose 1,6-bisphosphate 1-phosphatase activity;hydrolase activity;hydrolase activity, acting on ester bonds;ion binding;metal ion binding;phosphatase activity;phosphoric ester hydrolase activity;sugar-phosphatase activity	cell part;cytoplasmic part;cytosol;intracellular part;periplasmic space	alcohol metabolic process;biosynthetic process;carbohydrate metabolic process;cellular metabolic process;cellular process;metabolic process;phosphorus metabolic process;primary metabolic process;small molecule metabolic process	3	16	16	16	52.9	52.9	52.9	38.262	348
Q12464	RUVB2_YEAST	RuvB-like protein 2 (RUVBL2) (EC 3.6.4.12) (TIP49-homology protein 2) (TIP49b homolog)	RVB2 TIH2 TIP49B YPL235W P1060	1.07558	0.600199	-1.03634	-0.639436	3'-5' DNA helicase activity;5'-3' DNA helicase activity;adenyl nucleotide binding;adenyl ribonucleotide binding;ATP binding;ATPase activity;ATPase activity, coupled;ATP-dependent 3'-5' DNA helicase activity;ATP-dependent 5'-3' DNA helicase activity;ATP-dependent DNA helicase activity;ATP-dependent helicase activity;binding;catalytic activity;DNA helicase activity;DNA-dependent ATPase activity;hel…	cell part;chromatin remodeling complex;chromosomal part;DNA helicase complex;Ino80 complex;intracellular membrane-bounded organelle;intracellular organelle;intracellular organelle part;intracellular part;macromolecular complex;membrane-bounded organelle;nuclear chromosome part;nuclear part;nucleoplasm;nucleus;organelle;organelle part;protein complex;Swr1 complex	biological regulation;biosynthetic process;cellular component assembly;cellular component organization;cellular macromolecular complex assembly;cellular metabolic process;cellular nitrogen compound metabolic process;cellular process;chromatin modification;chromatin organization;chromosome organization;DNA geometric change;DNA metabolic process;DNA repair;macromolecular complex assembly;macromolec…	3	29	29	29	67.3	67.3	67.3	51.611	471
Q08723	RPN8_YEAST	26S proteasome regulatory subunit RPN8	RPN8 YOR261C O5360	1.06436	0.604248	-1.06871	-0.599903		cell part;cytoplasmic part;cytosolic part;cytosolic proteasome complex;intracellular part;macromolecular complex;proteasome complex;proteasome regulatory particle, lid subcomplex;proteasome storage granule;protein complex	catabolic process;cellular metabolic process;cellular process;macromolecule metabolic process;metabolic process;primary metabolic process;protein metabolic process;proteolysis;proteolysis involved in cellular protein catabolic process	3	16	16	15	77.2	77.2	75.1	38.312	338
P10869	AK_YEAST	Aspartokinase (EC 2.7.2.4) (Aspartate kinase)	HOM3 YER052C	1.05211	0.631489	-1.03805	-0.645557	adenyl nucleotide binding;adenyl ribonucleotide binding;amine binding;amino acid binding;amino acid kinase activity;aspartate kinase activity;ATP binding;binding;carboxylic acid binding;catalytic activity;kinase activity;nucleotide binding;phosphotransferase activity, carboxyl group as acceptor;purine nucleotide binding;purine ribonucleoside triphosphate binding;purine ribonucleotide binding;ribo…		amine metabolic process;biosynthetic process;cellular amino acid metabolic process;cellular ketone metabolic process;cellular metabolic process;cellular nitrogen compound metabolic process;cellular process;metabolic process;nitrogen compound metabolic process;organic acid metabolic process;primary metabolic process;small molecule metabolic process;sulfur compound metabolic process	3	24	24	24	52.2	52.2	52.2	58.109	527
P53885	MDG1_YEAST	Signal transduction protein MDG1 (Multicopy suppressor of defective G-protein 1)	MDG1 YNL173C N1673	0.987742	0.709552	-1.04927	-0.648029		cell part;membrane;plasma membrane	biological regulation;cellular process;response to stimulus;signal transduction	3	16	16	16	61.5	61.5	61.5	40.278	366
Q04458	HFD1_YEAST	Fatty aldehyde dehydrogenase HFD1 (EC 1.2.1.3)	HFD1 YMR110C YM9718.09C	1.02676	0.659007	-1.05568	-0.630084	3-chloroallyl aldehyde dehydrogenase activity;aldehyde dehydrogenase (NAD) activity;aldehyde dehydrogenase [NAD(P)+] activity;carboxylate reductase activity;catalytic activity;oxidoreductase activity;oxidoreductase activity, acting on the aldehyde or oxo group of donors;oxidoreductase activity, acting on the aldehyde or oxo group of donors, NAD or NADP as acceptor	cell part;cytoplasmic part;endosomal part;endosome membrane;integral to membrane;integral to mitochondrial membrane;integral to mitochondrial outer membrane;integral to organelle membrane;intracellular organelle part;intracellular part;intrinsic to membrane;intrinsic to mitochondrial outer membrane;intrinsic to organelle membrane;lipid particle;membrane;membrane part;mitochondrial membrane part;m…	catabolic process;cellular aldehyde metabolic process;cellular metabolic process;cellular process;metabolic process	3	23	23	23	47.2	47.2	47.2	59.978	532
Q99383	HRP1_YEAST	Nuclear polyadenylated RNA-binding protein 4 (Cleavage factor IB) (CFIB)	HRP1 NAB4 NAB5 YOL123W	0.00600546	1.39442	-0.893811	-0.506615	binding;mRNA binding;nucleic acid binding;nucleotide binding;RNA binding	cell part;cytoplasm;cytoplasmic part;intracellular membrane-bounded organelle;intracellular non-membrane-bounded organelle;intracellular organelle;intracellular organelle part;intracellular part;macromolecular complex;membrane-bounded organelle;mRNA cleavage factor complex;non-membrane-bounded organelle;nuclear part;nucleoplasm part;nucleus;organelle;organelle part;protein complex;ribonucleoprote…	catabolic process;cellular metabolic process;cellular nitrogen compound metabolic process;cellular process;macromolecule metabolic process;metabolic process;mRNA metabolic process;mRNA processing;nitrogen compound metabolic process;nucleobase-containing compound metabolic process;primary metabolic process;response to biotic stimulus;response to endogenous stimulus;response to stimulus;RNA catabol…	3	15	15	15	39.3	39.3	39.3	59.649	534
Q06523	YP148_YEAST	Uncharacterized protein YPR148C	YPR148C	0.259718	1.22795	-1.14266	-0.345007		cell part;cytoplasm;intracellular part		3	23	23	23	61.8	61.8	61.8	49.279	435
P10963	PCKA_YEAST	Phosphoenolpyruvate carboxykinase (ATP) (EC 4.1.1.49)	PCK1 PEPC PPC1 YKR097W	0.16608	1.16126	-1.27317	-0.0541731	adenyl nucleotide binding;adenyl ribonucleotide binding;ATP binding;binding;carbon-carbon lyase activity;carboxy-lyase activity;catalytic activity;lyase activity;nucleotide binding;phosphoenolpyruvate carboxykinase (ATP) activity;phosphoenolpyruvate carboxykinase activity;purine nucleotide binding;purine ribonucleoside triphosphate binding;purine ribonucleotide binding;ribonucleotide binding	cell part;cytoplasmic part;cytosol;intracellular part	alcohol metabolic process;biosynthetic process;carbohydrate metabolic process;cellular metabolic process;cellular process;metabolic process;primary metabolic process;small molecule metabolic process	3	34	34	34	73.2	73.2	73.2	60.983	549
P15891	ABP1_YEAST	Actin-binding protein	ABP1 YCR088W YCR88W	0.253301	1.18085	-1.22355	-0.210607	actin binding;actin filament binding;binding;cytoskeletal protein binding;protein binding	actin cortical patch;cell cortex;cell cortex part;cell part;cytoplasmic part;cytoskeletal part;intracellular organelle part;intracellular part;organelle part	biological regulation;cellular component assembly;cellular component organization;cellular process;cytoskeleton organization;localization;organelle organization;regulation of organelle organization	3	41	41	41	81.4	81.4	81.4	65.575	592
Q12460	NOP56_YEAST	Nucleolar protein 56 (Ribosome biosynthesis protein SIK1) (Suppressor of I kappa b protein 1)	NOP56 SIK1 YLR197W L8167.9	0.65047	0.988483	-1.17774	-0.461211		box C/D snoRNP complex;cell part;intracellular non-membrane-bounded organelle;intracellular organelle;intracellular organelle part;intracellular part;macromolecular complex;non-membrane-bounded organelle;nuclear part;nucleolar part;nucleolus;organelle;organelle part;preribosome;ribonucleoprotein complex;small nucleolar ribonucleoprotein complex;small-subunit processome	cellular metabolic process;cellular nitrogen compound metabolic process;cellular process;macromolecule metabolic process;macromolecule modification;metabolic process;nitrogen compound metabolic process;nucleobase-containing compound metabolic process;primary metabolic process;RNA metabolic process;RNA modification;RNA processing;rRNA processing	3	33	33	32	72.2	72.2	72.2	56.863	504
P36006	MYO3_YEAST	Myosin-3 (Actin-dependent myosin-I MYO3) (Class I unconventional myosin MYO3) (Type I myosin MYO3)	MYO3 YKL129C	0.628232	1.02983	-1.12075	-0.537312	adenyl nucleotide binding;adenyl ribonucleotide binding;ATP binding;binding;catalytic activity;cytoskeletal protein binding;hydrolase activity;hydrolase activity, acting on acid anhydrides;hydrolase activity, acting on acid anhydrides, in phosphorus-containing anhydrides;microfilament motor activity;motor activity;myosin binding;nucleoside-triphosphatase activity;nucleotide binding;protein bindin…	actin cortical patch;cell cortex part;cell part;cytoplasmic part;cytoskeletal part;intracellular organelle part;intracellular part;macromolecular complex;myosin complex;organelle part;protein complex	cell budding;cell division;cell wall organization;cell wall organization or biogenesis;cellular cell wall organization;cellular cell wall organization or biogenesis;cellular component organization;cellular localization;cellular membrane organization;cellular process;endocytosis;establishment of localization;establishment or maintenance of cell polarity;exocytosis;external encapsulating structure …	3	32	25	25	31.1	25.2	25.2	142.45	1272
P36112	MIC60_YEAST	MICOS complex subunit MIC60 (Altered inheritance of mitochondria protein 28) (Formation of crista junctions protein 1) (Found in mitochondrial proteome protein 13) (Mitofilin)	MIC60 AIM28 FCJ1 FMP13 YKR016W	0.644061	1.01346	-1.1324	-0.525123		cell part;crista junction;cytoplasmic part;intracellular organelle part;intracellular part;membrane;membrane part;mitochondrial crista;mitochondrial inner membrane;mitochondrial membrane;mitochondrial membrane part;mitochondrial part;organelle inner membrane;organelle membrane;organelle part	cellular component organization;cellular membrane organization;cellular process;establishment of localization;membrane organization;mitochondrion organization;organelle organization;protein targeting;protein transport;transmembrane transport;transport	3	24	24	24	50.7	50.7	50.7	61.081	540
P39714	BDH1_YEAST	(R,R)-butanediol dehydrogenase (EC 1.1.1.4)	BDH1 BDH YAL060W FUN49	0.663457	1.02335	-1.05543	-0.631384	(R,R)-butanediol dehydrogenase activity;binding;catalytic activity;cation binding;ion binding;metal ion binding;oxidoreductase activity;oxidoreductase activity, acting on CH-OH group of donors;oxidoreductase activity, acting on the CH-OH group of donors, NAD or NADP as acceptor;transition metal ion binding;zinc ion binding	cell part;cytoplasm;intracellular part	alcohol metabolic process;biosynthetic process;metabolic process;small molecule metabolic process	3	16	16	16	49.2	49.2	49.2	41.582	382
P07172	HIS8_YEAST	Histidinol-phosphate aminotransferase (EC 2.6.1.9) (Imidazole acetol-phosphate transaminase)	HIS5 YIL116W	0.674097	0.98931	-1.13452	-0.528885	binding;catalytic activity;cofactor binding;histidinol-phosphate transaminase activity;L-phenylalanine aminotransferase activity;L-phenylalanine:2-oxoglutarate aminotransferase activity;pyridoxal phosphate binding;transaminase activity;transferase activity;transferase activity, transferring nitrogenous groups;vitamin B6 binding;vitamin binding		amine metabolic process;biosynthetic process;cellular amino acid metabolic process;cellular ketone metabolic process;cellular metabolic process;cellular nitrogen compound metabolic process;cellular process;heterocycle metabolic process;metabolic process;nitrogen compound metabolic process;organic acid metabolic process;primary metabolic process;small molecule metabolic process	3	18	18	18	61.8	61.8	61.8	42.646	385
P11154	PYC1_YEAST	Pyruvate carboxylase 1 (EC 6.4.1.1) (Pyruvic carboxylase 1) (PCB 1)	PYC1 PYV YGL062W	0.519172	1.02032	-1.27194	-0.267551	adenyl nucleotide binding;adenyl ribonucleotide binding;ATP binding;binding;biotin carboxylase activity;catalytic activity;cation binding;DNA binding;ion binding;ligase activity;ligase activity, forming carbon-carbon bonds;ligase activity, forming carbon-nitrogen bonds;metal ion binding;nucleic acid binding;nucleotide binding;purine nucleotide binding;purine ribonucleoside triphosphate binding;pu…	cell part;cytoplasmic part;cytosol;intracellular part	alcohol metabolic process;biosynthetic process;carbohydrate metabolic process;cellular metabolic process;cellular process;metabolic process;primary metabolic process;small molecule metabolic process	3	74	74	34	67.9	67.9	34.2	130.1	1178
P27472	GYS2_YEAST	Glycogen [starch] synthase isoform 2 (EC 2.4.1.11)	GSY2 YLR258W L8479.8	0.49688	1.04105	-1.26227	-0.275657	catalytic activity;glucosyltransferase activity;glycogen (starch) synthase activity;transferase activity;transferase activity, transferring glycosyl groups;transferase activity, transferring hexosyl groups;UDP-glucosyltransferase activity;UDP-glycosyltransferase activity	cell part;cytoplasm;intracellular part	biosynthetic process;carbohydrate metabolic process;cellular metabolic process;cellular process;energy reserve metabolic process;generation of precursor metabolites and energy;macromolecule metabolic process;metabolic process;polysaccharide metabolic process;primary metabolic process	3	45	45	39	59.7	59.7	54.8	80.078	705
P39986	ATC6_YEAST	Manganese-transporting ATPase 1 (EC 3.6.3.-)	SPF1 YEL031W	0.558074	0.92578	-1.34632	-0.137538	active transmembrane transporter activity;adenyl nucleotide binding;adenyl ribonucleotide binding;ATP binding;ATPase activity;ATPase activity, coupled;ATPase activity, coupled to movement of substances;ATPase activity, coupled to transmembrane movement of ions;ATPase activity, coupled to transmembrane movement of ions, phosphorylative mechanism;ATPase activity, coupled to transmembrane movement o…	cell part;cis-Golgi network;cytoplasmic part;endoplasmic reticulum membrane;endoplasmic reticulum part;Golgi apparatus part;integral to membrane;intracellular organelle part;intracellular part;intrinsic to membrane;membrane;membrane part;organelle membrane;organelle part	biological regulation;cellular homeostasis;cellular ion homeostasis;cellular process;establishment of localization;homeostatic process;ion transport;transmembrane transport;transport	3	44	44	44	47.4	47.4	47.4	135.27	1215
P32775	GLGB_YEAST	1,4-alpha-glucan-branching enzyme (EC 2.4.1.18) (Glycogen-branching enzyme)	GLC3 YEL011W	0.547335	0.99499	-1.28157	-0.260753	1,4-alpha-glucan branching enzyme activity;binding;catalytic activity;cation binding;hydrolase activity;hydrolase activity, acting on glycosyl bonds;hydrolase activity, hydrolyzing O-glycosyl compounds;ion binding;transferase activity;transferase activity, transferring glycosyl groups;transferase activity, transferring hexosyl groups		biosynthetic process;carbohydrate metabolic process;cellular metabolic process;cellular process;energy reserve metabolic process;generation of precursor metabolites and energy;macromolecule metabolic process;metabolic process;polysaccharide metabolic process;primary metabolic process	3	34	34	34	50.6	50.6	50.6	81.115	704
P38707	SYNC_YEAST	Asparagine--tRNA ligase, cytoplasmic (EC 6.1.1.22) (Asparaginyl-tRNA synthetase) (AsnRS)	DED81 YHR019C	0.573666	0.970214	-1.2905	-0.253379	adenyl nucleotide binding;adenyl ribonucleotide binding;aminoacyl-tRNA ligase activity;asparagine-tRNA ligase activity;ATP binding;binding;catalytic activity;ligase activity;ligase activity, forming aminoacyl-tRNA and related compounds;ligase activity, forming carbon-oxygen bonds;nucleic acid binding;nucleotide binding;purine nucleotide binding;purine ribonucleoside triphosphate binding;purine ri…	cell part;cytoplasmic part;cytosol;intracellular part	amine metabolic process;cellular amino acid metabolic process;cellular ketone metabolic process;cellular metabolic process;cellular nitrogen compound metabolic process;cellular process;macromolecule metabolic process;metabolic process;nitrogen compound metabolic process;nucleobase-containing compound metabolic process;organic acid metabolic process;primary metabolic process;RNA metabolic process;…	3	32	32	32	59.2	59.2	59.2	62.206	554
P47120	DOHH_YEAST	Deoxyhypusine hydroxylase (DOHH) (EC 1.14.99.29) (Deoxyhypusine dioxygenase) (Deoxyhypusine monooxygenase) (Ligand of eIF5A protein 1)	LIA1 MMD1 YJR070C J1814	0.55437	0.957059	-1.31897	-0.192463	binding;catalytic activity;cation binding;deoxyhypusine monooxygenase activity;ion binding;metal ion binding;monooxygenase activity;oxidoreductase activity;oxidoreductase activity, acting on paired donors, with incorporation or reduction of molecular oxygen	cell part;cytoplasm;intracellular membrane-bounded organelle;intracellular organelle;intracellular part;membrane-bounded organelle;nucleus;organelle	amine metabolic process;biosynthetic process;cellular amino acid metabolic process;cellular component organization;cellular ketone metabolic process;cellular metabolic process;cellular nitrogen compound metabolic process;cellular process;cytoskeleton organization;macromolecule metabolic process;macromolecule modification;metabolic process;nitrogen compound metabolic process;organelle organization…	3	18	18	18	66.8	66.8	66.8	36.164	325
P47117	ARP3_YEAST	Actin-related protein 3 (Actin-like protein ARP3) (Actin-like protein 3)	ARP3 ACT4 YJR065C J1760	0.512452	1.02923	-1.26566	-0.276015	adenyl nucleotide binding;adenyl ribonucleotide binding;ATP binding;binding;nucleotide binding;purine nucleotide binding;purine ribonucleoside triphosphate binding;purine ribonucleotide binding;ribonucleotide binding	actin cortical patch;Arp2/3 protein complex;cell cortex part;cell part;cytoplasmic part;cytoskeletal part;intracellular organelle part;intracellular part;macromolecular complex;organelle part;protein complex	biological regulation;cellular component organization;cellular localization;cellular process;cytoskeleton organization;localization;mitochondrion organization;organelle inheritance;organelle localization;organelle organization;regulation of organelle organization	3	26	26	26	82.9	82.9	82.9	49.541	449
Q00402	NUM1_YEAST	Nuclear migration protein NUM1	NUM1 PAC12 YDR150W YD8358.06	0.50133	1.06719	-1.21994	-0.348586	binding;cytoskeletal protein binding;lipid binding;phospholipid binding;protein binding;tubulin binding	cell cortex;cell part;cellular bud tip;cytoplasmic part;endoplasmic reticulum;intracellular membrane-bounded organelle;intracellular organelle;intracellular part;membrane-bounded organelle;organelle;site of polarized growth	biological regulation;cellular component movement;cellular component organization;cellular localization;cellular process;cytoskeleton organization;cytoskeleton-dependent intracellular transport;establishment of localization;localization;mitochondrion organization;organelle fission;organelle inheritance;organelle localization;organelle organization;transport	3	49	49	49	40.9	40.9	40.9	313.03	2748
P28240	ACEA_YEAST	Isocitrate lyase (ICL) (EC 4.1.3.1) (Methylisocitrate lyase) (MICA) (EC 4.1.3.30) (Threo-D(S)-isocitrate glyoxylate-lyase)	ICL1 YER065C	0.386269	1.18508	-1.11111	-0.460241	binding;carbon-carbon lyase activity;catalytic activity;cation binding;ion binding;isocitrate lyase activity;lyase activity;metal ion binding;methylisocitrate lyase activity;oxo-acid-lyase activity	cell part;cytoplasm;cytoplasmic part;extracellular matrix;extracellular region part;intracellular membrane-bounded organelle;intracellular organelle;intracellular part;membrane-bounded organelle;organelle;proteinaceous extracellular matrix;vacuole	carbohydrate metabolic process;catabolic process;cellular aldehyde metabolic process;cellular ketone metabolic process;cellular metabolic process;cellular process;cofactor metabolic process;metabolic process;organic acid metabolic process;primary metabolic process;small molecule metabolic process	3	39	39	39	74.1	74.1	74.1	62.408	557
P48570	HOSC_YEAST	Homocitrate synthase, cytosolic isozyme (EC 2.3.3.14)	LYS20 YDL182W D1298	0.570375	1.03368	-1.20183	-0.40222	catalytic activity;homocitrate synthase activity;transferase activity;transferase activity, transferring acyl groups;transferase activity, transferring acyl groups, acyl groups converted into alkyl on transfer	cell part;cytoplasm;intracellular membrane-bounded organelle;intracellular organelle;intracellular part;membrane-bounded organelle;nucleus;organelle	amine metabolic process;biosynthetic process;cellular amino acid metabolic process;cellular ketone metabolic process;cellular metabolic process;cellular nitrogen compound metabolic process;cellular process;DNA metabolic process;DNA repair;macromolecule metabolic process;metabolic process;nitrogen compound metabolic process;nucleobase-containing compound metabolic process;organic acid metabolic pr…	3	36	10	10	84.8	24.3	24.3	47.098	428
P40017	YAT2_YEAST	Carnitine O-acetyltransferase YAT2 (EC 2.3.1.7)	YAT2 YER024W	0.390801	1.15513	-1.17171	-0.374215	acetyltransferase activity;carnitine O-acetyltransferase activity;carnitine O-acyltransferase activity;catalytic activity;O-acetyltransferase activity;O-acyltransferase activity;transferase activity;transferase activity, transferring acyl groups;transferase activity, transferring acyl groups other than amino-acyl groups	cell part;cytoplasmic part;cytosol;intracellular part	alcohol metabolic process;amine metabolic process;cellular amino acid metabolic process;cellular ketone metabolic process;cellular lipid metabolic process;cellular metabolic process;cellular nitrogen compound metabolic process;cellular process;establishment of localization;lipid metabolic process;metabolic process;nitrogen compound metabolic process;organic acid metabolic process;primary metaboli…	3	32	32	32	39.9	39.9	39.9	103.33	923
P32366	VA0D_YEAST	V-type proton ATPase subunit d (V-ATPase subunit d) (V-ATPase 39 kDa subunit) (V-ATPase subunit M39) (Vacuolar proton pump subunit d)	VMA6 YLR447C L9324.8	0.438942	1.16396	-1.09119	-0.511708	active transmembrane transporter activity;ATPase activity;ATPase activity, coupled;ATPase activity, coupled to movement of substances;ATPase activity, coupled to transmembrane movement of ions;ATPase activity, coupled to transmembrane movement of substances;catalytic activity;cation transmembrane transporter activity;cation-transporting ATPase activity;hydrogen ion transmembrane transporter activ…	cell part;cytoplasmic part;fungal-type vacuole membrane;intracellular organelle part;intracellular part;macromolecular complex;membrane;membrane part;organelle membrane;organelle part;protein complex;proton-transporting two-sector ATPase complex, proton-transporting domain;proton-transporting V-type ATPase, V0 domain;vacuolar membrane;vacuolar part;vacuolar proton-transporting V-type ATPase, V0 d…	biological regulation;cellular homeostasis;cellular ion homeostasis;cellular process;establishment of localization;homeostatic process;hydrogen transport;ion transport;transmembrane transport;transport;vacuolar transport	3	17	17	17	71.9	71.9	71.9	39.79	345
P53912	YNN4_YEAST	Uncharacterized protein YNL134C	YNL134C N1214 N1847	0.414488	1.1342	-1.18822	-0.360461	aldehyde dehydrogenase (NAD) activity;binding;catalytic activity;cation binding;ion binding;metal ion binding;oxidoreductase activity;oxidoreductase activity, acting on the aldehyde or oxo group of donors;oxidoreductase activity, acting on the aldehyde or oxo group of donors, NAD or NADP as acceptor;transition metal ion binding;zinc ion binding			3	27	27	26	78.2	78.2	76.3	41.164	376
Q05050	EIS1_YEAST	Eisosome protein 1	EIS1 YMR031C YM9973.04C	-0.226618	1.44007	-0.869993	-0.343457		cell cortex part;cell part;cytoplasmic part;eisosome;intracellular part;macromolecular complex;membrane;plasma membrane;protein complex	cellular component assembly;cellular component organization;cellular macromolecular complex assembly;cellular process;macromolecular complex assembly;protein complex assembly	3	53	53	53	61.8	61.8	61.8	93.344	843
Q04175	SXM1_YEAST	Importin beta SMX1 (Suppressor of mRNA export mutant protein 1) (karyopherin-108)	SXM1 KAP108 YDR395W	-0.183612	1.31481	-1.1123	-0.0188937	protein transporter activity;substrate-specific transporter activity;transporter activity	cell part;cytoplasm;intracellular membrane-bounded organelle;intracellular organelle;intracellular organelle part;intracellular part;macromolecular complex;membrane part;membrane-bounded organelle;nuclear part;nuclear pore;nucleus;organelle;organelle part;pore complex;protein complex	establishment of localization;nuclear transport;nucleobase-containing compound transport;nucleocytoplasmic transport;protein transport;transport	3	21	21	21	28	28	28	108.4	944
P09733	TBA1_YEAST	Tubulin alpha-1 chain	TUB1 YML085C	-0.310335	1.4365	-0.884046	-0.242119	binding;catalytic activity;GTP binding;GTPase activity;guanyl nucleotide binding;guanyl ribonucleotide binding;hydrolase activity;hydrolase activity, acting on acid anhydrides;hydrolase activity, acting on acid anhydrides, in phosphorus-containing anhydrides;nucleoside-triphosphatase activity;nucleotide binding;purine nucleotide binding;purine ribonucleoside triphosphate binding;purine ribonucleo…	cell part;cytoplasmic microtubule;cytoplasmic part;cytoskeletal part;intracellular organelle part;intracellular part;kinetochore microtubule;macromolecular complex;microtubule;microtubule organizing center;nuclear microtubule;nuclear part;organelle part;polar microtubule;protein complex;spindle microtubule;spindle pole body;tubulin complex	cellular component assembly;cellular component movement;cellular component organization;cellular macromolecular complex assembly;cellular process;chromosome organization;chromosome segregation;cytoskeleton-dependent intracellular transport;establishment of localization;macromolecular complex assembly;organelle organization;protein complex assembly;protein polymerization;transport	3	22	22	14	63.8	63.8	44.1	49.799	447
P21242	PSA7_YEAST	Probable proteasome subunit alpha type-7 (EC 3.4.25.1) (Macropain subunit C1) (Multicatalytic endopeptidase complex subunit C1) (Proteasome component C1) (Proteinase YSCE subunit 1)	PRE10 PRC1 PRS1 YOR362C O6650	0.107883	1.37422	-0.768957	-0.713148	binding;catalytic activity;endopeptidase activity;hydrolase activity;mRNA binding;nucleic acid binding;peptidase activity;peptidase activity, acting on L-amino acid peptides;RNA binding;threonine-type endopeptidase activity;threonine-type peptidase activity	cell part;cytoplasm;cytoplasmic part;cytosolic part;cytosolic proteasome complex;intracellular membrane-bounded organelle;intracellular organelle;intracellular part;macromolecular complex;membrane;membrane part;membrane-bounded organelle;nuclear outer membrane-endoplasmic reticulum membrane network;nucleus;organelle;proteasome complex;proteasome core complex, alpha-subunit complex;proteasome stor…	catabolic process;cellular metabolic process;cellular process;macromolecule metabolic process;metabolic process;primary metabolic process;protein metabolic process;proteolysis;proteolysis involved in cellular protein catabolic process	3	11	11	11	42.7	42.7	42.7	31.536	288
P41807	VATH_YEAST	V-type proton ATPase subunit H (V-ATPase subunit H) (V-ATPase 54 kDa subunit) (Vacuolar proton pump subunit H)	VMA13 CLS11 YPR036W YP3085.02	0.0753977	1.3871	-0.710904	-0.751592	active transmembrane transporter activity;ATPase activity;ATPase activity, coupled;ATPase activity, coupled to movement of substances;ATPase activity, coupled to transmembrane movement of ions;ATPase activity, coupled to transmembrane movement of substances;catalytic activity;cation transmembrane transporter activity;cation-transporting ATPase activity;hydrogen ion transmembrane transporter activ…	cell part;cytoplasmic part;fungal-type vacuole membrane;intracellular organelle part;intracellular part;macromolecular complex;membrane;membrane part;organelle membrane;organelle part;protein complex;proton-transporting two-sector ATPase complex, catalytic domain;proton-transporting V-type ATPase, V1 domain;vacuolar membrane;vacuolar part;vacuolar proton-transporting V-type ATPase, V1 domain	biological regulation;cellular homeostasis;cellular ion homeostasis;cellular process;establishment of localization;homeostatic process;hydrogen transport;ion transport;transmembrane transport;transport	3	30	30	30	64	64	64	54.415	478
Q03102	YMN1_YEAST	Uncharacterized membrane protein YML131W	YML131W YM4987.04	-0.0230207	1.42122	-0.666664	-0.731539	binding;catalytic activity;cation binding;ion binding;metal ion binding;oxidoreductase activity;transition metal ion binding;zinc ion binding	cell part;integral to membrane;intrinsic to membrane;membrane part		3	14	14	14	50.4	50.4	50.4	39.976	365
Q12447	PAA1_YEAST	Polyamine N-acetyltransferase 1 (EC 2.3.1.-) (Arylalkylamine N-acetyltransferase homolog) (scAANAT)	PAA1 YDR071C	-0.0590891	1.43271	-0.671801	-0.701816	acetyltransferase activity;aralkylamine N-acetyltransferase activity;catalytic activity;diamine N-acetyltransferase activity;N-acetyltransferase activity;N-acyltransferase activity;transferase activity;transferase activity, transferring acyl groups;transferase activity, transferring acyl groups other than amino-acyl groups	cell part;cytoplasm;intracellular part	cellular component organization;cellular process;chromatin organization;chromosome organization;metabolic process;organelle organization	3	15	15	15	74.3	74.3	74.3	21.947	191
P42940	ETFB_YEAST	Probable electron transfer flavoprotein subunit beta (Beta-ETF) (Changed intracellular redox state protein 1)	CIR1 YGR207C G7742	0.0374704	1.38912	-0.553022	-0.873566	electron carrier activity	cell part;cytoplasmic part;intracellular organelle lumen;intracellular organelle part;intracellular part;membrane-enclosed lumen;mitochondrial matrix;mitochondrial part;organelle lumen;organelle part	metabolic process	3	17	17	17	70.5	70.5	70.5	28.758	261
Q03195	RLI1_YEAST	Translation initiation factor RLI1 (ATP-binding cassette sub-family E member RLI1) (RNase L inhibitor)	RLI1 YDR091C	0.0414565	1.3962	-0.630897	-0.806763	adenyl nucleotide binding;adenyl ribonucleotide binding;ATP binding;ATPase activity;binding;catalytic activity;cation binding;hydrolase activity;hydrolase activity, acting on acid anhydrides;hydrolase activity, acting on acid anhydrides, in phosphorus-containing anhydrides;ion binding;iron ion binding;iron-sulfur cluster binding;metal cluster binding;metal ion binding;nucleic acid binding;nucleos…	cell part;cytoplasm;cytoplasmic part;cytosolic part;cytosolic ribosome;intracellular membrane-bounded organelle;intracellular non-membrane-bounded organelle;intracellular organelle;intracellular part;macromolecular complex;membrane-bounded organelle;non-membrane-bounded organelle;nucleus;organelle;ribonucleoprotein complex;ribosome	biological regulation;cellular component disassembly;cellular component organization;cellular localization;cellular metabolic process;cellular nitrogen compound metabolic process;cellular process;establishment of localization;localization;macromolecule metabolic process;metabolic process;nitrogen compound metabolic process;nuclear transport;nucleobase-containing compound metabolic process;nucleoc…	3	28	28	28	45.6	45.6	45.6	68.34	608
P06101	CDC37_YEAST	Hsp90 co-chaperone Cdc37 (Cell division control protein 37) (Hsp90 chaperone protein kinase-targeting subunit)	CDC37 SMO1 YDR168W YD9489.03	-0.187445	1.44491	-0.420758	-0.836703	binding;protein binding;unfolded protein binding	cell part;cytoplasm;intracellular part	biological regulation;cell division;cellular component assembly;cellular component organization;cellular process;regulation of cell cycle;regulation of protein stability;response to stimulus;signal transduction	3	26	26	26	63	63	63	58.384	506
P34216	EDE1_YEAST	EH domain-containing and endocytosis protein 1 (Bud site selection protein 15)	EDE1 BUD15 YBL047C YBL0501 YBL0520	-0.135538	1.41401	-0.352029	-0.926439	binding;calcium ion binding;cation binding;ion binding;metal ion binding;protein binding;small conjugating protein binding;ubiquitin binding	actin cortical patch;cell cortex part;cell part;cellular bud neck;cellular bud tip;cytoplasm;cytoplasmic part;cytoskeletal part;intracellular organelle part;intracellular part;organelle part;site of polarized growth	biological regulation;cellular component organization;cellular membrane organization;cellular process;endocytosis;establishment of localization;membrane invagination;membrane organization;response to chemical stimulus;response to stimulus;response to stress;signal transduction;transport;vesicle-mediated transport	3	37	37	37	37.6	37.6	37.6	150.78	1381
P17076	RL8A_YEAST	60S ribosomal protein L8-A (L4) (L4-2) (L7a-1) (Large ribosomal subunit protein eL8-A) (Maintenance of killer protein 7) (RP6) (YL5)	RPL8A MAK7 RPL4A YHL033C	-0.291077	1.47736	-0.713646	-0.472639	structural constituent of ribosome;structural molecule activity	cell part;cytosolic large ribosomal subunit;intracellular organelle part;intracellular part;large ribosomal subunit;macromolecular complex;organelle part;ribonucleoprotein complex	biosynthetic process;cellular metabolic process;cellular nitrogen compound metabolic process;cellular process;cytoplasmic translation;macromolecule metabolic process;metabolic process;nitrogen compound metabolic process;nucleobase-containing compound metabolic process;primary metabolic process;protein metabolic process;RNA metabolic process;RNA processing;rRNA processing;translation	3	27	5	5	77.3	16.8	16.8	28.124	256
P43585	VTC2_YEAST	Vacuolar transporter chaperone 2 (Phosphate metabolism protein 1)	VTC2 PHM1 YFL004W	-0.221257	1.47249	-0.622486	-0.628749		cell part;cytoplasmic part;endoplasmic reticulum;fungal-type vacuole membrane;integral to membrane;intracellular membrane-bounded organelle;intracellular organelle;intracellular organelle part;intracellular part;intrinsic to membrane;macromolecular complex;membrane;membrane part;membrane-bounded organelle;organelle;organelle membrane;organelle part;protein complex;vacuolar membrane;vacuolar part;…	autophagy;catabolic process;cellular component organization;cellular membrane organization;cellular metabolic process;cellular process;establishment of localization;localization;membrane fusion;membrane invagination;membrane organization;metabolic process;organelle organization;phosphorus metabolic process;transport;vacuolar transport;vacuole organization	3	47	47	45	55.3	55.3	53.4	95.44	828
P07259	PYR1_YEAST	Protein URA2 [Includes: Glutamine-dependent carbamoyl-phosphate synthase (EC 6.3.5.5); Aspartate carbamoyltransferase (EC 2.1.3.2)]	URA2 YJL130C J0686	0.0453424	1.07829	0.214052	-1.33769	adenyl nucleotide binding;adenyl ribonucleotide binding;amine binding;amino acid binding;aspartate carbamoyltransferase activity;ATP binding;binding;carbamoyl-phosphate synthase (glutamine-hydrolyzing) activity;carbon-nitrogen ligase activity, with glutamine as amido-N-donor;carboxyl- or carbamoyltransferase activity;carboxylic acid binding;catalytic activity;cation binding;ion binding;ligase act…	cell part;cytoplasm;integral to membrane;intracellular part;intrinsic to membrane;membrane part	amine metabolic process;biological regulation;biosynthetic process;catabolic process;cellular amino acid metabolic process;cellular aromatic compound metabolic process;cellular ketone metabolic process;cellular metabolic process;cellular nitrogen compound metabolic process;cellular process;heterocycle metabolic process;metabolic process;nitrogen compound metabolic process;nucleobase-containing co…	3	134	134	132	67.6	67.6	66.7	245.04	2214
P54115	ALDH6_YEAST	Magnesium-activated aldehyde dehydrogenase, cytosolic (EC 1.2.1.4) (Mg(2+)-activated acetaldehyde dehydrogenase) (Mg(2+)-ACDH)	ALD6 ALDH1 YPL061W LPE9	0.086609	1.13477	0.0817395	-1.30312	aldehyde dehydrogenase (NADP+) activity;aldehyde dehydrogenase [NAD(P)+] activity;catalytic activity;oxidoreductase activity;oxidoreductase activity, acting on the aldehyde or oxo group of donors;oxidoreductase activity, acting on the aldehyde or oxo group of donors, NAD or NADP as acceptor	cell part;cytoplasmic part;cytosol;intracellular membrane-bounded organelle;intracellular organelle;intracellular part;membrane-bounded organelle;mitochondrion;organelle	alcohol metabolic process;biosynthetic process;catabolic process;cellular ketone metabolic process;cellular metabolic process;cellular nitrogen compound metabolic process;cellular process;cofactor metabolic process;heterocycle metabolic process;metabolic process;nitrogen compound metabolic process;nucleobase-containing compound metabolic process;nucleobase-containing small molecule metabolic proc…	3	41	41	41	82.4	82.4	82.4	54.414	500
P40580	BZRD_YEAST	Benzil reductase ((S)-benzoin forming) IRC24 (EC 1.1.1.320) (Increased recombination centers protein 24)	IRC24 YIR036C	0.159941	1.20148	-0.131097	-1.23032	catalytic activity;oxidoreductase activity;oxidoreductase activity, acting on NADH or NADPH;oxidoreductase activity, acting on NADH or NADPH, oxygen as acceptor			3	16	16	16	64.6	64.6	64.6	28.804	263
P39076	TCPB_YEAST	T-complex protein 1 subunit beta (TCP-1-beta) (CCT-beta)	CCT2 BIN3 TCP2 YIL142W	0.134887	1.15151	0.000388369	-1.28679	adenyl nucleotide binding;adenyl ribonucleotide binding;ATP binding;binding;nucleotide binding;protein binding;purine nucleotide binding;purine ribonucleoside triphosphate binding;purine ribonucleotide binding;ribonucleotide binding;unfolded protein binding	cell part;chaperonin-containing T-complex;cytoplasmic part;cytosolic part;intracellular part;macromolecular complex;protein complex	cellular metabolic process;cellular process;macromolecule metabolic process;metabolic process;primary metabolic process;protein folding;protein metabolic process	3	28	28	28	71.9	71.9	71.9	57.203	527
Q00955	ACAC_YEAST	Acetyl-CoA carboxylase (ACC) (EC 6.4.1.2) (Fatty acid synthetase 3) (mRNA transport-defective protein 7) [Includes: Biotin carboxylase (EC 6.3.4.14)]	ACC1 ABP2 FAS3 MTR7 YNR016C N3175	-0.0167295	0.943541	0.453099	-1.37991	acetyl-CoA carboxylase activity;adenyl nucleotide binding;adenyl ribonucleotide binding;ATP binding;binding;biotin carboxylase activity;catalytic activity;cation binding;CoA carboxylase activity;ion binding;ligase activity;ligase activity, forming carbon-carbon bonds;ligase activity, forming carbon-nitrogen bonds;metal ion binding;nucleotide binding;purine nucleotide binding;purine ribonucleoside…	cell part;cytoplasmic part;endoplasmic reticulum membrane;endoplasmic reticulum part;intracellular organelle part;intracellular part;membrane;membrane part;organelle membrane;organelle part	biosynthetic process;cellular component organization;cellular ketone metabolic process;cellular lipid metabolic process;cellular membrane organization;cellular metabolic process;cellular process;establishment of localization;lipid metabolic process;membrane organization;metabolic process;nuclear transport;nucleocytoplasmic transport;organic acid metabolic process;primary metabolic process;protein…	3	160	160	155	76.5	76.5	74.3	250.35	2233
P38426	TPS3_YEAST	Trehalose synthase complex regulatory subunit TPS3 (Alpha,alpha-trehalose-phosphate synthase [UDP-forming] 115 kDa subunit)	TPS3 YMR261C YM8156.03C	0.348643	0.762437	0.360944	-1.47202	catalytic activity;enzyme regulator activity	alpha,alpha-trehalose-phosphate synthase complex (UDP-forming);cell part;cytoplasmic part;intracellular part;macromolecular complex;protein complex	biological regulation;biosynthetic process;carbohydrate metabolic process;cellular metabolic process;cellular process;metabolic process;oligosaccharide metabolic process;phosphorus metabolic process;primary metabolic process	3	40	38	38	50.6	48.2	48.2	118.83	1054
P53334	SCW4_YEAST	Probable family 17 glucosidase SCW4 (EC 3.2.1.-) (Soluble cell wall protein 4)	SCW4 YGR279C	0.316834	0.795577	0.351523	-1.46393	catalytic activity;glucosidase activity;hydrolase activity;hydrolase activity, acting on glycosyl bonds;hydrolase activity, hydrolyzing O-glycosyl compounds	cell part;cell wall;cytoplasmic part;external encapsulating structure;extracellular region;fungal-type cell wall;intracellular membrane-bounded organelle;intracellular organelle;intracellular part;membrane-bounded organelle;organelle;vacuole	carbohydrate metabolic process;cell wall organization;cell wall organization or biogenesis;conjugation;conjugation with cellular fusion;metabolic process;multi-organism process;primary metabolic process;reproduction	3	8	8	8	33.7	33.7	33.7	40.173	386
Q03161	YMY9_YEAST	Glucose-6-phosphate 1-epimerase (EC 5.1.3.15) (D-hexose-6-phosphate mutarotase)	YMR099C YM6543.06C	0.204889	0.801391	0.448042	-1.45432	binding;carbohydrate binding;catalytic activity;glucose-6-phosphate 1-epimerase activity;isomerase activity;racemase and epimerase activity;racemase and epimerase activity, acting on carbohydrates and derivatives		carbohydrate metabolic process;cellular metabolic process;cellular process;metabolic process;primary metabolic process	3	21	21	21	86.2	86.2	86.2	33.955	297
P38708	YHI0_YEAST	Putative proline--tRNA ligase YHR020W (EC 6.1.1.15) (Prolyl-tRNA synthetase) (ProRS)	YHR020W	0.422374	0.785921	0.254322	-1.46262	adenyl nucleotide binding;adenyl ribonucleotide binding;aminoacyl-tRNA editing activity;aminoacyl-tRNA ligase activity;ATP binding;binding;carboxylic ester hydrolase activity;catalytic activity;hydrolase activity;hydrolase activity, acting on ester bonds;ligase activity;ligase activity, forming aminoacyl-tRNA and related compounds;ligase activity, forming carbon-oxygen bonds;nucleotide binding;pr…	cell part;cytoplasm;intracellular part	amine metabolic process;cellular amino acid metabolic process;cellular ketone metabolic process;cellular metabolic process;cellular nitrogen compound metabolic process;cellular process;macromolecule metabolic process;metabolic process;nitrogen compound metabolic process;nucleobase-containing compound metabolic process;organic acid metabolic process;primary metabolic process;RNA metabolic process;…	3	42	42	42	72.1	72.1	72.1	77.385	688
P80235	CACM_YEAST	Putative mitochondrial carnitine O-acetyltransferase (EC 2.3.1.7)	YAT1 YAR035W	0.281899	0.977205	0.136258	-1.39536	acetyltransferase activity;carnitine O-acetyltransferase activity;carnitine O-acyltransferase activity;catalytic activity;O-acetyltransferase activity;O-acyltransferase activity;transferase activity;transferase activity, transferring acyl groups;transferase activity, transferring acyl groups other than amino-acyl groups	cell part;cytoplasmic part;intracellular membrane-bounded organelle;intracellular organelle;intracellular organelle part;intracellular part;membrane;membrane-bounded organelle;mitochondrial inner membrane;mitochondrial membrane;mitochondrial part;mitochondrion;organelle;organelle inner membrane;organelle membrane;organelle part	alcohol metabolic process;amine metabolic process;cellular amino acid metabolic process;cellular ketone metabolic process;cellular lipid metabolic process;cellular metabolic process;cellular nitrogen compound metabolic process;cellular process;establishment of localization;lipid metabolic process;metabolic process;nitrogen compound metabolic process;organic acid metabolic process;primary metaboli…	3	24	24	24	44.3	44.3	44.3	77.765	687
Q02046	MTD1_YEAST	Methylenetetrahydrofolate dehydrogenase [NAD(+)] (EC 1.5.1.15)	MTD1 YKR080W YKR400	0.273825	0.903749	0.252318	-1.42989	catalytic activity;methylenetetrahydrofolate dehydrogenase (NAD+) activity;methylenetetrahydrofolate dehydrogenase (NADP+) activity;oxidoreductase activity;oxidoreductase activity, acting on the CH-NH group of donors;oxidoreductase activity, acting on the CH-NH group of donors, NAD or NADP as acceptor	cell part;cytoplasmic part;cytosol;intracellular membrane-bounded organelle;intracellular organelle;intracellular part;membrane-bounded organelle;nucleus;organelle	biosynthetic process;cellular aromatic compound metabolic process;cellular metabolic process;cellular nitrogen compound metabolic process;cellular process;cofactor metabolic process;heterocycle metabolic process;metabolic process;nitrogen compound metabolic process;nucleobase-containing compound metabolic process;nucleobase-containing small molecule metabolic process;nucleotide metabolic process;…	3	16	16	16	60.9	60.9	60.9	36.239	320
Q05905	HRI1_YEAST	Protein HRI1 (HRR25-interacting protein 1)	HRI1 YLR301W	0.368565	0.833316	0.249789	-1.45167		cell part;cytoplasmic part;endoplasmic reticulum membrane;endoplasmic reticulum part;intracellular membrane-bounded organelle;intracellular organelle;intracellular organelle part;intracellular part;membrane;membrane part;membrane-bounded organelle;nucleus;organelle;organelle membrane;organelle part	establishment of localization;protein targeting;protein transport;transport	3	17	17	17	66.4	66.4	66.4	27.5	244
Q03104	MSC1_YEAST	Meiotic sister chromatid recombination protein 1	MSC1 YML128C YM4987.07C	0.777298	0.636454	-0.00281994	-1.41093		cell part;cytoplasmic part;intracellular membrane-bounded organelle;intracellular organelle;intracellular part;membrane-bounded organelle;mitochondrion;organelle	cellular metabolic process;cellular nitrogen compound metabolic process;cellular process;DNA metabolic process;DNA recombination;macromolecule metabolic process;metabolic process;nitrogen compound metabolic process;nucleobase-containing compound metabolic process;primary metabolic process	3	32	32	32	60.4	60.4	60.4	59.588	513
P25491	MAS5_YEAST	Mitochondrial protein import protein MAS5 (Yeast dnaJ protein 1)	YDJ1 MAS5 YNL064C N2418 YNL2418C	0.631782	0.815409	-0.0569704	-1.39022	adenyl nucleotide binding;adenyl ribonucleotide binding;ATP binding;ATPase activator activity;ATPase regulator activity;binding;cation binding;enzyme activator activity;enzyme regulator activity;ion binding;metal ion binding;nucleoside-triphosphatase regulator activity;nucleotide binding;protein binding;purine nucleotide binding;purine ribonucleoside triphosphate binding;purine ribonucleotide bin…	cell part;cytoplasmic part;cytosol;cytosolic part;ER membrane insertion complex;intracellular part;macromolecular complex;perinuclear region of cytoplasm;protein complex;TRC complex	biological regulation;catabolic process;cellular metabolic process;cellular process;establishment of localization;macromolecule metabolic process;macromolecule modification;metabolic process;primary metabolic process;protein folding;protein metabolic process;protein modification by small protein conjugation or removal;protein modification process;protein targeting;protein transport;proteolysis;pr…	3	26	26	26	69.9	69.9	69.9	44.67	409
Q06151	DCPS_YEAST	m7GpppX diphosphatase (EC 3.6.1.59) (DCS-1) (Hint-related 7meGMP-directed hydrolase 1) (Protein Dcs1p) (Scavenger mRNA-decapping enzyme DcpS)	DCS1 YLR270W	0.750162	0.761574	-0.158127	-1.35361	binding;catalytic activity;hydrolase activity;hydrolase activity, acting on acid anhydrides;hydrolase activity, acting on acid anhydrides, in phosphorus-containing anhydrides;identical protein binding;m7G(5')pppN diphosphatase activity;nucleic acid binding;protein binding;protein dimerization activity;protein heterodimerization activity;protein homodimerization activity;pyrophosphatase activity;R…	cell part;cytoplasm;cytoplasmic mRNA processing body;cytoplasmic part;intracellular non-membrane-bounded organelle;intracellular organelle;intracellular part;macromolecular complex;non-membrane-bounded organelle;organelle;perinuclear region of cytoplasm;ribonucleoprotein complex;RNA granule	biological regulation;catabolic process;cellular metabolic process;cellular nitrogen compound metabolic process;cellular process;macromolecule metabolic process;metabolic process;mRNA metabolic process;nitrogen compound metabolic process;nucleobase-containing compound metabolic process;primary metabolic process;response to abiotic stimulus;response to chemical stimulus;response to external stimul…	3	25	25	25	66.6	66.6	66.6	40.769	350
P39004	HXT7_YEAST	High-affinity hexose transporter HXT7	HXT7 YDR342C D9651.11	0.721911	0.772663	-0.128837	-1.36574	carbohydrate transmembrane transporter activity;fructose transmembrane transporter activity;glucose transmembrane transporter activity;hexose transmembrane transporter activity;mannose transmembrane transporter activity;monosaccharide transmembrane transporter activity;pentose transmembrane transporter activity;substrate-specific transmembrane transporter activity;substrate-specific transporter a…	cell part;integral to membrane;intrinsic to membrane;membrane;membrane part;plasma membrane	carbohydrate transport;cellular process;establishment of localization;transmembrane transport;transport	3	22	3	3	38.4	3.5	3.5	62.734	570
P25619	HSP30_YEAST	30 kDa heat shock protein	HSP30 YCR021C YCR21C	0.662848	0.844079	-0.156493	-1.35043		cell part;integral to membrane;intrinsic to membrane;membrane;membrane part;plasma membrane	biological regulation;cellular process;response to abiotic stimulus;response to chemical stimulus;response to DNA damage stimulus;response to heat;response to osmotic stress;response to oxidative stress;response to stimulus;response to stress	3	7	7	7	36.1	36.1	36.1	37.044	332
P32911	SUI1_YEAST	Eukaryotic translation initiation factor eIF-1 (Protein translation factor SUI1)	SUI1 RFR1 YNL244C N0905	0.711981	0.740909	-0.059852	-1.39304	binding;nucleic acid binding;protein binding;ribonucleoprotein binding;ribosomal small subunit binding;RNA binding;translation factor activity, nucleic acid binding;translation initiation factor activity;translation initiation factor binding	cell part;cytoplasmic part;eukaryotic 43S preinitiation complex;intracellular part;macromolecular complex;multi-eIF complex;ribonucleoprotein complex;translation preinitiation complex	biological regulation;cellular component assembly;cellular component organization;cellular macromolecular complex assembly;cellular process;macromolecular complex assembly;regulation of translation;ribonucleoprotein complex assembly	3	9	9	9	72.2	72.2	72.2	12.312	108
P16547	OM45_YEAST	Mitochondrial outer membrane protein OM45 (Outer membrane protein of 45 kDa)	OM45 YIL136W	0.855987	0.672614	-0.19572	-1.33288		cell part;cytoplasmic part;integral to membrane;integral to mitochondrial membrane;integral to mitochondrial outer membrane;integral to organelle membrane;intracellular membrane-bounded organelle;intracellular organelle;intracellular organelle part;intracellular part;intrinsic to membrane;intrinsic to mitochondrial outer membrane;intrinsic to organelle membrane;membrane;membrane part;membrane-bou…		3	51	51	51	73.5	73.5	73.5	44.58	393
P39730	IF2P_YEAST	Eukaryotic translation initiation factor 5B (eIF-5B) (EC 3.6.5.3) (Translation initiation factor IF-2)	FUN12 YAL035W	0.826449	0.708898	-0.203847	-1.3315	binding;catalytic activity;GTP binding;GTPase activity;guanyl nucleotide binding;guanyl ribonucleotide binding;hydrolase activity;hydrolase activity, acting on acid anhydrides;hydrolase activity, acting on acid anhydrides, in phosphorus-containing anhydrides;nucleic acid binding;nucleoside-triphosphatase activity;nucleotide binding;protein binding;purine nucleotide binding;purine ribonucleoside t…	cell part;cytoplasmic part;cytosolic small ribosomal subunit;eukaryotic 48S preinitiation complex;intracellular organelle part;intracellular part;macromolecular complex;organelle part;ribonucleoprotein complex;small ribosomal subunit;translation preinitiation complex	biological regulation;cellular component assembly;cellular component organization;cellular macromolecular complex assembly;cellular metabolic process;cellular nitrogen compound metabolic process;cellular process;macromolecular complex assembly;macromolecule metabolic process;metabolic process;nitrogen compound metabolic process;nucleobase-containing compound metabolic process;organelle assembly;p…	3	43	43	43	46.5	46.5	46.5	112.27	1002
P30822	XPO1_YEAST	Exportin-1 (Chromosome region maintenance protein 1) (Karyopherin-124)	CRM1 KAP124 XPO1 YGR218W G8514	0.812359	0.782569	-0.320097	-1.27483	protein transporter activity;substrate-specific transporter activity;transporter activity	cell part;chromosomal part;cytoplasmic part;cytoskeletal part;intracellular membrane-bounded organelle;intracellular non-membrane-bounded organelle;intracellular organelle;intracellular organelle part;intracellular part;kinetochore;macromolecular complex;membrane-bounded organelle;microtubule organizing center;non-membrane-bounded organelle;nucleus;organelle;organelle part;perinuclear region of c…	cellular localization;cellular process;establishment of localization;localization;nuclear transport;nucleobase-containing compound transport;nucleocytoplasmic transport;protein targeting;protein transport;ribosomal subunit export from nucleus;transport	3	37	37	37	39.9	39.9	39.9	124.1	1084
P06103	EIF3B_YEAST	Eukaryotic translation initiation factor 3 subunit B (eIF3b) (Cell cycle regulation and translation initiation protein) (Eukaryotic translation initiation factor 3 90 kDa subunit) (eIF3 p90) (Translation initiation factor eIF3 p90 subunit)	PRT1 CDC63 YOR361C	0.811927	0.762414	-0.277158	-1.29718	binding;nucleic acid binding;nucleotide binding;RNA binding;translation factor activity, nucleic acid binding;translation initiation factor activity	cell part;cytoplasm;cytoplasmic part;eukaryotic 43S preinitiation complex;eukaryotic 48S preinitiation complex;eukaryotic translation initiation factor 3 complex;intracellular non-membrane-bounded organelle;intracellular organelle;intracellular part;macromolecular complex;multi-eIF complex;non-membrane-bounded organelle;organelle;protein complex;ribonucleoprotein complex;RNA granule;stress granul…	biological regulation;cellular component assembly;cellular component organization;cellular macromolecular complex assembly;cellular process;macromolecular complex assembly;regulation of translation;ribonucleoprotein complex assembly;translational initiation	3	35	35	35	50.6	50.6	50.6	88.129	763
P0CT04	IPB2_YEAST	Protease B inhibitor 2 (Proteinase inhibitor I(B)2)	PBI2 YNL015W N2844	0.74013	0.789448	-0.190692	-1.33889	endopeptidase inhibitor activity;endopeptidase regulator activity;enzyme inhibitor activity;enzyme regulator activity;peptidase inhibitor activity;peptidase regulator activity;serine-type endopeptidase inhibitor activity	cell part;cytoplasmic part;fungal-type vacuole;intracellular membrane-bounded organelle;intracellular organelle;intracellular part;lytic vacuole;membrane-bounded organelle;nucleus;organelle;storage vacuole;vacuole	biological regulation;cellular component organization;cellular membrane organization;cellular process;establishment of localization;membrane fusion;membrane organization;organelle organization;protein transport;transport;vacuole organization	3	10	10	10	89.3	89.3	89.3	8.5897	75
P41911	GPD2_YEAST	Glycerol-3-phosphate dehydrogenase [NAD(+)] 2, mitochondrial (EC 1.1.1.8)	GPD2 GPD3 YOL059W O1222	0.826245	0.767032	-0.317203	-1.27607	binding;catalytic activity;coenzyme binding;cofactor binding;glycerol-3-phosphate dehydrogenase [NAD+] activity;NAD binding;nucleotide binding;oxidoreductase activity;oxidoreductase activity, acting on CH-OH group of donors;oxidoreductase activity, acting on the CH-OH group of donors, NAD or NADP as acceptor	cell part;cytoplasmic part;cytosol;glycerol-3-phosphate dehydrogenase complex;intracellular membrane-bounded organelle;intracellular organelle;intracellular part;macromolecular complex;membrane-bounded organelle;mitochondrion;organelle;protein complex	alcohol metabolic process;carbohydrate metabolic process;catabolic process;cellular metabolic process;cellular nitrogen compound metabolic process;cellular process;cofactor metabolic process;heterocycle metabolic process;metabolic process;nitrogen compound metabolic process;nucleobase-containing compound metabolic process;nucleobase-containing small molecule metabolic process;nucleotide metabolic…	3	15	14	14	50.9	47.5	47.5	49.421	440
Q06336	GGA1_YEAST	ADP-ribosylation factor-binding protein GGA1 (Golgi-localized, gamma ear-containing, ARF-binding protein 1)	GGA1 YDR358W D9476.2	0.895397	0.55009	-0.0704589	-1.37503	binding;protein binding;small conjugating protein binding;ubiquitin binding	AP-type membrane coat adaptor complex;cell part;clathrin adaptor complex;cytoplasmic part;Golgi apparatus part;intracellular organelle part;intracellular part;macromolecular complex;membrane part;organelle part;protein complex;trans-Golgi network	cellular process;endosome transport;establishment of localization;Golgi vesicle transport;protein targeting;protein transport;transport;vacuolar transport;vesicle-mediated transport	3	25	25	25	57.6	57.6	57.6	62.319	557
P32379	PSA5_YEAST	Proteasome subunit alpha type-5 (EC 3.4.25.1) (Macropain subunit PUP2) (Multicatalytic endopeptidase complex subunit PUP2) (Proteasome component PUP2) (Proteinase YSCE subunit PUP2)	PUP2 DOA5 YGR253C G9155	0.859986	0.522878	0.0265051	-1.40937	catalytic activity;endopeptidase activity;hydrolase activity;peptidase activity;peptidase activity, acting on L-amino acid peptides;threonine-type endopeptidase activity;threonine-type peptidase activity	cell part;cytoplasm;cytoplasmic part;cytosolic part;cytosolic proteasome complex;intracellular membrane-bounded organelle;intracellular organelle;intracellular part;macromolecular complex;membrane;membrane part;membrane-bounded organelle;nuclear outer membrane-endoplasmic reticulum membrane network;nucleus;organelle;proteasome complex;proteasome core complex, alpha-subunit complex;proteasome stor…	catabolic process;cellular metabolic process;cellular process;macromolecule metabolic process;metabolic process;primary metabolic process;protein metabolic process;proteolysis;proteolysis involved in cellular protein catabolic process	3	16	16	16	66.5	66.5	66.5	28.617	260
P53731	ARPC2_YEAST	Actin-related protein 2/3 complex subunit 2 (Arp2/3 complex 34 kDa subunit) (p34-ARC)	ARC35 YNR035C N3296	1.08804	0.388524	-0.202044	-1.27452	structural molecule activity	actin cortical patch;Arp2/3 protein complex;cell cortex part;cell part;cytoplasmic part;cytoskeletal part;cytosol;intracellular organelle part;intracellular part;macromolecular complex;organelle part;protein complex	biological regulation;cellular component organization;cellular localization;cellular membrane organization;cellular process;cytoskeleton organization;endocytosis;establishment of localization;localization;membrane invagination;membrane organization;mitochondrion organization;organelle inheritance;organelle localization;organelle organization;regulation of organelle organization;transport;vesicle-…	3	15	15	15	58.2	58.2	58.2	39.566	342
P30402	PYRX_YEAST	Orotate phosphoribosyltransferase 2 (OPRT 2) (OPRTase 2) (EC 2.4.2.10)	URA10 YMR271C YM8156.13C	0.863587	0.583053	-0.0645769	-1.38206	catalytic activity;orotate phosphoribosyltransferase activity;transferase activity;transferase activity, transferring glycosyl groups;transferase activity, transferring pentosyl groups		biosynthetic process;cellular aromatic compound metabolic process;cellular metabolic process;cellular nitrogen compound metabolic process;cellular process;heterocycle metabolic process;metabolic process;nitrogen compound metabolic process;nucleobase-containing compound metabolic process;nucleobase-containing small molecule metabolic process;nucleoside metabolic process;nucleotide metabolic proces…	3	15	13	13	59.9	50.7	50.7	24.81	227
P50861	RIB4_YEAST	6,7-dimethyl-8-ribityllumazine synthase (DMRL synthase) (LS) (Lumazine synthase) (EC 2.5.1.78)	RIB4 YOL143C	1.00874	0.497796	-0.205626	-1.30091	6,7-dimethyl-8-ribityllumazine synthase activity;catalytic activity;intramolecular transferase activity;intramolecular transferase activity, transferring acyl groups;isomerase activity;transferase activity	cell part;cytoplasmic part;intracellular organelle part;intracellular part;macromolecular complex;membrane-enclosed lumen;mitochondrial intermembrane space;mitochondrial part;organelle envelope lumen;organelle part;protein complex;riboflavin synthase complex	biosynthetic process;cellular metabolic process;cellular nitrogen compound metabolic process;cellular process;heterocycle metabolic process;metabolic process;nitrogen compound metabolic process;small molecule metabolic process;vitamin metabolic process	3	7	7	7	74	74	74	18.555	169
P35176	CYPD_YEAST	Peptidyl-prolyl cis-trans isomerase D (PPIase D) (EC 5.2.1.8) (Cyclophilin D) (Rotamase D)	CPR5 CYP5 CYPD YDR304C D9740.14	0.943488	0.602551	-0.247832	-1.29821	binding;catalytic activity;cis-trans isomerase activity;isomerase activity;peptide binding;peptidyl-prolyl cis-trans isomerase activity	cell part;cytoplasmic part;endoplasmic reticulum;endoplasmic reticulum lumen;endoplasmic reticulum part;intracellular membrane-bounded organelle;intracellular organelle;intracellular organelle lumen;intracellular organelle part;intracellular part;membrane-bounded organelle;membrane-enclosed lumen;organelle;organelle lumen;organelle part	cellular metabolic process;cellular process;macromolecule metabolic process;metabolic process;primary metabolic process;protein folding;protein metabolic process	3	11	11	11	54.2	54.2	54.2	25.326	225
P39968	VAC8_YEAST	Vacuolar protein 8	VAC8 YEB3 YEL013W	0.569184	0.800647	0.0556174	-1.42545	binding;protein anchor;protein binding	cell part;cytoplasmic part;fungal-type vacuole membrane;intracellular organelle part;intracellular part;macromolecular complex;membrane;membrane part;Myo2p-Vac17p-Vac8p transport complex;nucleus-vacuole junction;organelle membrane;organelle membrane contact site;organelle part;protein complex;vacuolar membrane;vacuolar part	autophagy;catabolic process;cell communication;cellular component assembly;cellular component organization;cellular membrane organization;cellular metabolic process;cellular process;membrane docking;membrane fusion;membrane invagination;membrane organization;metabolic process;organelle assembly;organelle inheritance;organelle organization;response to external stimulus;response to extracellular st…	3	23	23	23	52.1	52.1	52.1	63.207	578
P31688	TPS2_YEAST	Trehalose-phosphatase (EC 3.1.3.12) (Trehalose synthase complex catalytic subunit TPS2) (Trehalose-6-phosphate phosphatase) (TPP)	TPS2 PFK3 YDR074W YD8554.07	0.581561	0.815413	0.0160469	-1.41302	carbohydrate phosphatase activity;catalytic activity;hydrolase activity;hydrolase activity, acting on ester bonds;phosphatase activity;phosphoric ester hydrolase activity;trehalose-phosphatase activity	alpha,alpha-trehalose-phosphate synthase complex (UDP-forming);cell part;cytoplasmic part;intracellular part;macromolecular complex;protein complex	biosynthetic process;carbohydrate metabolic process;cellular metabolic process;cellular process;metabolic process;oligosaccharide metabolic process;phosphorus metabolic process;primary metabolic process;response to abiotic stimulus;response to heat;response to stimulus;response to stress	3	52	52	52	69.9	69.9	69.9	102.98	896
P32563	VPH1_YEAST	V-type proton ATPase subunit a, vacuolar isoform (V-ATPase a 1 subunit) (V-ATPase 95 kDa subunit) (Vacuolar pH protein 1) (Vacuolar proton pump a subunit) (Vacuolar proton translocating ATPase subunit a 1)	VPH1 YOR270C	0.539236	0.780108	0.12465	-1.44399	active transmembrane transporter activity;ATPase activity;ATPase activity, coupled;ATPase activity, coupled to movement of substances;ATPase activity, coupled to transmembrane movement of ions;ATPase activity, coupled to transmembrane movement of substances;catalytic activity;cation transmembrane transporter activity;cation-transporting ATPase activity;hydrogen ion transmembrane transporter activ…	cell part;cytoplasmic part;fungal-type vacuole;fungal-type vacuole membrane;integral to membrane;intracellular membrane-bounded organelle;intracellular organelle;intracellular organelle part;intracellular part;intrinsic to membrane;lytic vacuole;macromolecular complex;membrane;membrane part;membrane-bounded organelle;organelle;organelle membrane;organelle part;protein complex;proton-transporting …	biological regulation;cell growth;cellular component assembly;cellular component organization;cellular homeostasis;cellular ion homeostasis;cellular metabolic process;cellular process;establishment of localization;growth;homeostatic process;hydrogen transport;ion transport;macromolecular complex assembly;metabolic process;phosphorus metabolic process;protein complex assembly;transmembrane transpo…	3	33	33	33	45	45	45	95.528	840
P32643	TMT1_YEAST	Trans-aconitate 3-methyltransferase (EC 2.1.1.145)	TMT1 TAM1 YER175C SYGP-ORF63	0.5383	0.801046	0.095713	-1.43506	catalytic activity;methyltransferase activity;S-adenosylmethionine-dependent methyltransferase activity;trans-aconitate 3-methyltransferase activity;transferase activity;transferase activity, transferring one-carbon groups	cell part;cytoplasmic part;cytosol;intracellular part		3	22	22	22	79.3	79.3	79.3	34.768	299
P04046	PUR1_YEAST	Amidophosphoribosyltransferase (ATase) (EC 2.4.2.14) (Glutamine phosphoribosylpyrophosphate amidotransferase)	ADE4 YMR300C YM9952.02C	0.465696	0.798287	0.188692	-1.45267	amidophosphoribosyltransferase activity;binding;catalytic activity;cation binding;identical protein binding;ion binding;metal ion binding;protein binding;transferase activity;transferase activity, transferring glycosyl groups;transferase activity, transferring pentosyl groups		amine metabolic process;biosynthetic process;cellular amino acid metabolic process;cellular aromatic compound metabolic process;cellular ketone metabolic process;cellular metabolic process;cellular nitrogen compound metabolic process;cellular process;heterocycle metabolic process;metabolic process;nitrogen compound metabolic process;nucleobase-containing compound metabolic process;nucleobase-cont…	3	30	30	30	62	62	62	56.719	510
P32565	RPN2_YEAST	26S proteasome regulatory subunit RPN2	RPN2 SEN3 YIL075C	0.562175	0.927304	-0.146913	-1.34257	binding;binding, bridging;enzyme regulator activity;protein binding;protein binding, bridging	cell part;cytoplasmic part;cytosolic part;cytosolic proteasome complex;intracellular membrane-bounded organelle;intracellular organelle;intracellular part;macromolecular complex;membrane-bounded organelle;nucleus;organelle;proteasome complex;proteasome regulatory particle, base subcomplex;proteasome storage granule;protein complex	biological regulation;catabolic process;cellular component assembly;cellular component organization;cellular macromolecular complex assembly;cellular metabolic process;cellular process;macromolecular complex assembly;macromolecule metabolic process;metabolic process;primary metabolic process;protein complex assembly;protein metabolic process;proteolysis;proteolysis involved in cellular protein ca…	3	42	41	41	41.5	40.7	40.7	104.23	945
P11745	RNA1_YEAST	Ran GTPase-activating protein 1 (Protein involved in RNA production/processing)	RNA1 YMR235C YM9959.17C	0.522205	0.902181	-0.0417689	-1.38262	enzyme activator activity;enzyme regulator activity;GTPase activator activity;GTPase regulator activity;nucleoside-triphosphatase regulator activity	cell part;cytoplasmic part;cytosol;intracellular membrane-bounded organelle;intracellular organelle;intracellular part;membrane-bounded organelle;nucleus;organelle	biological regulation;cellular localization;cellular process;establishment of localization;gene silencing;localization;nuclear transport;nucleobase-containing compound transport;nucleocytoplasmic transport;protein targeting;protein transport;regulation of gene expression, epigenetic;ribosomal subunit export from nucleus;transport	3	24	24	24	74.7	74.7	74.7	45.815	407
P32590	HSP79_YEAST	Heat shock protein homolog SSE2	SSE2 HSP YBR169C YBR1221	0.558258	0.897636	-0.0865476	-1.36935	adenyl nucleotide binding;adenyl ribonucleotide binding;adenyl-nucleotide exchange factor activity;ATP binding;ATPase regulator activity;binding;enzyme regulator activity;nucleoside-triphosphatase regulator activity;nucleotide binding;purine nucleotide binding;purine ribonucleoside triphosphate binding;purine ribonucleotide binding;ribonucleotide binding		biological regulation;cellular metabolic process;cellular process;macromolecule metabolic process;metabolic process;primary metabolic process;protein folding;protein metabolic process	3	61	51	51	71.4	61.9	61.9	77.62	693
Q08977	YP260_YEAST	UPF0662 protein YPL260W	YPL260W	1.09535	0.580053	-0.66412	-1.01128		cell part;cytoplasm;intracellular membrane-bounded organelle;intracellular organelle;intracellular part;membrane-bounded organelle;nucleus;organelle		3	34	34	34	67	67	67	62.779	551
P08067	UCRI_YEAST	Cytochrome b-c1 complex subunit Rieske, mitochondrial (EC 1.10.2.2) (Complex III subunit 5) (Rieske iron-sulfur protein) (RISP) (Ubiquinol-cytochrome c reductase iron-sulfur subunit)	RIP1 YEL024W	1.12474	0.556891	-0.766989	-0.91464	2 iron, 2 sulfur cluster binding;binding;catalytic activity;cation binding;cation transmembrane transporter activity;hydrogen ion transmembrane transporter activity;inorganic cation transmembrane transporter activity;ion binding;ion transmembrane transporter activity;iron-sulfur cluster binding;metal cluster binding;metal ion binding;monovalent inorganic cation transmembrane transporter activity;…	cell part;cytoplasmic part;intracellular membrane-bounded organelle;intracellular organelle;intracellular organelle part;intracellular part;macromolecular complex;membrane part;membrane-bounded organelle;mitochondrial membrane part;mitochondrial part;mitochondrial respiratory chain complex III;mitochondrion;organelle;organelle part;protein complex;respiratory chain complex III	cellular metabolic process;cellular process;cellular respiration;generation of precursor metabolites and energy;metabolic process	3	14	14	14	55.8	55.8	55.8	23.365	215
P00729	CBPY_YEAST	Carboxypeptidase Y (CPD-Y) (cpY) (EC 3.4.16.5) (Carboxypeptidase YSCY)	PRC1 YMR297W	1.1357	0.508232	-0.59767	-1.04627	carboxypeptidase activity;catalytic activity;exopeptidase activity;hydrolase activity;peptidase activity;peptidase activity, acting on L-amino acid peptides;serine hydrolase activity;serine-type carboxypeptidase activity;serine-type exopeptidase activity;serine-type peptidase activity	cell part;cytoplasmic part;fungal-type vacuole;intracellular membrane-bounded organelle;intracellular organelle;intracellular part;lytic vacuole;membrane-bounded organelle;organelle;storage vacuole;vacuole	biosynthetic process;catabolic process;cellular metabolic process;cellular process;macromolecule metabolic process;metabolic process;peptide metabolic process;primary metabolic process;protein catabolic process;protein metabolic process;secondary metabolic process	3	17	17	17	40.2	40.2	40.2	59.801	532
P22202	HSP74_YEAST	Heat shock protein SSA4	SSA4 YER103W	0.982154	0.664756	-0.478988	-1.16792	adenyl nucleotide binding;adenyl ribonucleotide binding;ATP binding;ATPase activity;binding;catalytic activity;hydrolase activity;hydrolase activity, acting on acid anhydrides;hydrolase activity, acting on acid anhydrides, in phosphorus-containing anhydrides;nucleoside-triphosphatase activity;nucleotide binding;protein binding;purine nucleotide binding;purine ribonucleoside triphosphate binding;p…	cell part;cytoplasm;intracellular membrane-bounded organelle;intracellular organelle;intracellular part;membrane-bounded organelle;nucleus;organelle	cellular metabolic process;cellular process;establishment of localization;macromolecule metabolic process;metabolic process;primary metabolic process;protein folding;protein metabolic process;protein transport;response to abiotic stimulus;response to heat;response to stimulus;response to stress;transmembrane transport;transport	3	64	41	32	73.4	56.5	48.4	69.65	642
P54113	PUR91_YEAST	Bifunctional purine biosynthesis protein ADE16 [Includes: Phosphoribosylaminoimidazolecarboxamide formyltransferase (EC 2.1.2.3) (5-aminoimidazole-4-carboxamide ribonucleotide formyltransferase) (AICAR transformylase); IMP cyclohydrolase (EC 3.5.4.10) (ATIC) (IMP synthase) (Inosinicase)]	ADE16 YLR028C	0.965752	0.726944	-0.615844	-1.07685	catalytic activity;cyclohydrolase activity;hydrolase activity;hydrolase activity, acting on carbon-nitrogen (but not peptide) bonds;hydrolase activity, acting on carbon-nitrogen (but not peptide) bonds, in cyclic amidines;hydroxymethyl-, formyl- and related transferase activity;IMP cyclohydrolase activity;phosphoribosylaminoimidazolecarboxamide formyltransferase activity;transferase activity;tran…	cell part;cytoplasmic part;cytosol;intracellular part	anatomical structure development;anatomical structure formation involved in morphogenesis;ascospore formation;biosynthetic process;cell development;cell differentiation;cellular metabolic process;cellular nitrogen compound metabolic process;cellular process;cellular respiration;developmental process;generation of precursor metabolites and energy;heterocycle metabolic process;metabolic process;nit…	3	38	31	31	70.7	60.7	60.7	65.282	591
Q08971	YP225_YEAST	Protein PBDC1 homolog	YPL225W	0.95294	0.706019	-0.499805	-1.15915		cell part;cytoplasm;intracellular part		3	22	22	22	91.8	91.8	91.8	17.445	146
P54885	PROA_YEAST	Gamma-glutamyl phosphate reductase (GPR) (EC 1.2.1.41) (Glutamate-5-semialdehyde dehydrogenase) (GSA dehydrogenase) (Glutamyl-gamma-semialdehyde dehydrogenase)	PRO2 YOR323C O6155	1.00254	0.651555	-0.508944	-1.14515	binding;catalytic activity;coenzyme binding;cofactor binding;glutamate-5-semialdehyde dehydrogenase activity;NADP binding;nucleotide binding;oxidoreductase activity;oxidoreductase activity, acting on the aldehyde or oxo group of donors;oxidoreductase activity, acting on the aldehyde or oxo group of donors, NAD or NADP as acceptor		amine metabolic process;biosynthetic process;cellular amino acid metabolic process;cellular ketone metabolic process;cellular metabolic process;cellular nitrogen compound metabolic process;cellular process;heterocycle metabolic process;metabolic process;nitrogen compound metabolic process;organic acid metabolic process;primary metabolic process;small molecule metabolic process	3	21	21	21	56.6	56.6	56.6	49.74	456
P36047	SDS22_YEAST	Protein phosphatase 1 regulatory subunit SDS22	SDS22 EGP1 YKL193C	1.06747	0.584188	-0.547226	-1.10443	enzyme activator activity;enzyme inhibitor activity;enzyme regulator activity;phosphatase activator activity;phosphatase inhibitor activity;phosphatase regulator activity;protein phosphatase activator activity;protein phosphatase inhibitor activity;protein phosphatase regulator activity;protein phosphatase type 1 activator activity;protein phosphatase type 1 regulator activity;protein serine/thre…	cell part;cytoplasmic part;intracellular membrane-bounded organelle;intracellular organelle;intracellular part;macromolecular complex;membrane-bounded organelle;nucleus;organelle;protein complex;protein phosphatase type 1 complex;protein serine/threonine phosphatase complex	biological regulation;cell division;cellular component organization;cellular process;chromosome segregation;mitosis;nuclear division;organelle fission;organelle organization	3	19	19	19	68.9	68.9	68.9	38.887	338
Q12165	ATPD_YEAST	ATP synthase subunit delta, mitochondrial (F-ATPase delta subunit)	ATP16 YDL004W D2935 YD8119.03	1.01436	0.656869	-0.568152	-1.10308	active transmembrane transporter activity;ATPase activity;ATPase activity, coupled;ATPase activity, coupled to movement of substances;ATPase activity, coupled to transmembrane movement of ions;ATPase activity, coupled to transmembrane movement of substances;catalytic activity;cation transmembrane transporter activity;cation-transporting ATPase activity;hydrogen ion transmembrane transporter activ…	cell part;cytoplasmic part;intracellular organelle part;intracellular part;macromolecular complex;membrane part;mitochondrial membrane part;mitochondrial part;mitochondrial proton-transporting ATP synthase, central stalk;organelle part;protein complex;proton-transporting ATP synthase, central stalk	biosynthetic process;cellular metabolic process;cellular nitrogen compound metabolic process;cellular process;establishment of localization;heterocycle metabolic process;hydrogen transport;ion transport;metabolic process;nitrogen compound metabolic process;nucleobase-containing compound metabolic process;nucleobase-containing small molecule metabolic process;nucleotide metabolic process;primary m…	3	7	5	5	72.5	67.5	67.5	17.02	160
P01123	YPT1_YEAST	GTP-binding protein YPT1 (Protein YP2) (Rab GTPase YPT1) (Transport GTPase YPT1)	YPT1 YP2 YFL038C	0.959597	0.734564	-0.6185	-1.07566	binding;catalytic activity;GTP binding;GTPase activity;guanyl nucleotide binding;guanyl ribonucleotide binding;hydrolase activity;hydrolase activity, acting on acid anhydrides;hydrolase activity, acting on acid anhydrides, in phosphorus-containing anhydrides;nucleoside-triphosphatase activity;nucleotide binding;protein binding;purine nucleotide binding;purine ribonucleoside triphosphate binding;p…	cell part;cytoplasmic part;cytoplasmic vesicle;endoplasmic reticulum membrane;endoplasmic reticulum part;Golgi apparatus part;Golgi membrane;Golgi stack;intracellular organelle;intracellular organelle part;intracellular part;membrane;membrane part;organelle;organelle membrane;organelle part;pre-autophagosomal structure;pre-autophagosomal structure membrane;trans-Golgi network;vesicle	autophagy;biological regulation;catabolic process;cell communication;cellular component assembly;cellular component disassembly;cellular component organization;cellular membrane organization;cellular metabolic process;cellular process;endosome transport;establishment of localization;Golgi vesicle transport;macromolecular complex assembly;membrane docking;membrane organization;metabolic process;or…	3	15	15	15	74.8	74.8	74.8	23.214	206
P38088	SYG_YEAST	Glycine--tRNA ligase 1, mitochondrial (EC 6.1.1.14) (Diadenosine tetraphosphate synthetase) (AP-4-A synthetase) (Glycyl-tRNA synthetase 1) (GlyRS 1) (GlyRS1)	GRS1 YBR121C YBR0917	0.891539	0.788289	-0.545934	-1.13389	adenyl nucleotide binding;adenyl ribonucleotide binding;aminoacyl-tRNA ligase activity;ATP binding;binding;catalytic activity;glycine-tRNA ligase activity;ligase activity;ligase activity, forming aminoacyl-tRNA and related compounds;ligase activity, forming carbon-oxygen bonds;nucleotide binding;protein binding;protein dimerization activity;purine nucleotide binding;purine ribonucleoside triphosp…	cell part;cytoplasm;cytoplasmic part;intracellular membrane-bounded organelle;intracellular organelle;intracellular organelle lumen;intracellular organelle part;intracellular part;membrane-bounded organelle;membrane-enclosed lumen;mitochondrial matrix;mitochondrial part;mitochondrion;organelle;organelle lumen;organelle part	amine metabolic process;biosynthetic process;cellular amino acid metabolic process;cellular ketone metabolic process;cellular metabolic process;cellular nitrogen compound metabolic process;cellular process;heterocycle metabolic process;macromolecule metabolic process;metabolic process;nitrogen compound metabolic process;nucleobase-containing compound metabolic process;nucleobase-containing small …	3	59	59	58	74.2	74.2	72.9	78.183	690
P22855	MAN1_YEAST	Alpha-mannosidase (EC 3.2.1.24) (Alpha-D-mannoside mannohydrolase)	AMS1 YGL156W G1861	0.820954	0.823838	-0.438564	-1.20623	alpha-mannosidase activity;binding;carbohydrate binding;catalytic activity;cation binding;hydrolase activity;hydrolase activity, acting on glycosyl bonds;hydrolase activity, hydrolyzing O-glycosyl compounds;ion binding;mannosidase activity;metal ion binding;transition metal ion binding;zinc ion binding	cell part;cytoplasmic part;fungal-type vacuole membrane;intracellular organelle part;intracellular part;membrane;organelle membrane;organelle part;vacuolar membrane;vacuolar part	alcohol metabolic process;carbohydrate metabolic process;catabolic process;cellular metabolic process;cellular process;metabolic process;oligosaccharide metabolic process;primary metabolic process;small molecule metabolic process	3	56	56	56	58.7	58.7	58.7	124.5	1083
P06115	CATT_YEAST	Catalase T (EC 1.11.1.6)	CTT1 YGR088W	0.841958	0.779051	-0.380184	-1.24083	antioxidant activity;binding;catalase activity;catalytic activity;cation binding;heme binding;ion binding;iron ion binding;metal ion binding;oxidoreductase activity;oxidoreductase activity, acting on peroxide as acceptor;peroxidase activity;tetrapyrrole binding;transition metal ion binding	cell part;cytoplasm;intracellular part	catabolic process;cellular metabolic process;cellular process;metabolic process;response to abiotic stimulus;response to chemical stimulus;response to osmotic stress;response to oxidative stress;response to stimulus;response to stress	3	27	27	27	63.3	63.3	63.3	64.583	562
Q12443	RTN2_YEAST	Reticulon-like protein 2	RTN2 YDL204W D1062	0.814333	0.865266	-0.541765	-1.13783		cell cortex part;cell part;cortical endoplasmic reticulum;cytoplasmic part;endoplasmic reticulum membrane;endoplasmic reticulum part;endoplasmic reticulum tubular network;integral to membrane;intracellular organelle part;intracellular part;intrinsic to membrane;membrane;membrane part;organelle membrane;organelle part	cellular component organization;cellular process;endoplasmic reticulum organization;organelle organization	3	23	23	23	57.8	57.8	57.8	44.358	393
P25367	RNQ1_YEAST	[PIN+] prion protein RNQ1 (Rich in asparagine and glutamine protein 1)	RNQ1 YCL028W YCL181 YCL28W	0.796862	0.874937	-0.51806	-1.15374		cell part;cytoplasmic part;cytosol;intracellular membrane-bounded organelle;intracellular organelle;intracellular part;membrane-bounded organelle;nucleus;organelle		3	6	6	6	21.7	21.7	21.7	42.579	405
P38137	FAT2_YEAST	Peroxisomal-coenzyme A synthetase (EC 6.-.-.-)	PCS60 FAT2 YBR222C YBR1512	0.876155	0.796738	-0.521585	-1.15131	acid-thiol ligase activity;binding;catalytic activity;identical protein binding;ligase activity;ligase activity, forming carbon-sulfur bonds;mRNA binding;nucleic acid binding;oxalate-CoA ligase activity;protein binding;RNA binding	cell part;cytoplasmic part;intracellular membrane-bounded organelle;intracellular organelle;intracellular organelle lumen;intracellular organelle part;intracellular part;membrane;membrane-bounded organelle;membrane-enclosed lumen;microbody;microbody lumen;microbody membrane;microbody part;organelle;organelle lumen;organelle membrane;organelle part;peroxisomal matrix;peroxisomal membrane;peroxisom…	catabolic process;cellular ketone metabolic process;cellular metabolic process;cellular process;metabolic process;organic acid metabolic process;small molecule metabolic process	3	20	20	20	41.4	41.4	41.4	60.488	543
P41810	COPB_YEAST	Coatomer subunit beta (Beta-coat protein) (Beta-COP)	SEC26 YDR238C YD8419.05C	0.723977	0.961968	-0.588739	-1.09721	structural molecule activity	cell part;coated vesicle;COPI vesicle coat;cytoplasmic membrane-bounded vesicle;cytoplasmic part;cytoplasmic vesicle;cytoplasmic vesicle part;Golgi apparatus part;intracellular membrane-bounded organelle;intracellular organelle;intracellular organelle part;intracellular part;macromolecular complex;membrane coat;membrane part;membrane-bounded organelle;membrane-bounded vesicle;organelle;organelle …	cellular process;establishment of localization;Golgi vesicle transport;protein transport;transport;vesicle-mediated transport	3	44	44	44	52.8	52.8	52.8	109.02	973
P37299	QCR10_YEAST	Cytochrome b-c1 complex subunit 10 (Complex III subunit 10) (Complex III subunit XI) (Ubiquinol-cytochrome c reductase complex 8.5 kDa protein)	QCR10 YHR001W-A YHR001BW	0.863866	0.842063	-0.641339	-1.06459		cell part;cytoplasmic part;intracellular organelle part;intracellular part;macromolecular complex;membrane part;mitochondrial membrane part;mitochondrial part;mitochondrial respiratory chain complex III;organelle part;protein complex;respiratory chain complex III	cellular metabolic process;cellular process;cellular respiration;generation of precursor metabolites and energy;metabolic process	3	6	6	6	55.8	55.8	55.8	8.5928	77
P04037	COX4_YEAST	Cytochrome c oxidase subunit 4, mitochondrial (EC 1.9.3.1) (Cytochrome c oxidase polypeptide IV)	COX4 YGL187C G1362	0.772491	0.93462	-0.662993	-1.04412	binding;catalytic activity;cation binding;cation transmembrane transporter activity;cytochrome-c oxidase activity;heme-copper terminal oxidase activity;hydrogen ion transmembrane transporter activity;inorganic cation transmembrane transporter activity;ion binding;ion transmembrane transporter activity;metal ion binding;monovalent inorganic cation transmembrane transporter activity;oxidoreductase …	cell part;cytoplasmic part;intracellular membrane-bounded organelle;intracellular organelle;intracellular organelle part;intracellular part;macromolecular complex;membrane;membrane part;membrane-bounded organelle;membrane-enclosed lumen;mitochondrial inner membrane;mitochondrial intermembrane space;mitochondrial membrane;mitochondrial membrane part;mitochondrial part;mitochondrial respiratory cha…	cellular component assembly;cellular component organization;cellular macromolecular complex assembly;cellular metabolic process;cellular process;cellular respiration;generation of precursor metabolites and energy;macromolecular complex assembly;metabolic process;protein complex assembly;protein complex biogenesis	3	11	11	11	79.4	79.4	79.4	17.142	155
Q03690	CLU_YEAST	Clustered mitochondria protein 1 (Translation initiation factor 31) (eIF3-associated protein p135)	CLU1 TIF31 YMR012W YM8270.16	0.645825	0.961442	-0.375331	-1.23194	binding;nucleic acid binding;RNA binding;translation factor activity, nucleic acid binding;translation initiation factor activity	cell part;cytoplasmic part;eukaryotic translation initiation factor 3 complex;intracellular part;macromolecular complex;protein complex	cellular component organization;cellular localization;cellular process;localization;mitochondrion organization;organelle localization;organelle organization;translational initiation	3	57	57	57	54.5	54.5	54.5	145.16	1277
P38968	SEC31_YEAST	Protein transport protein SEC31 (Protein WEB1)	SEC31 WEB1 YDL195W D1229	0.695001	0.943366	-0.44175	-1.19662	structural molecule activity	cell part;COPII vesicle coat;cytoplasmic part;cytoplasmic vesicle part;endoplasmic reticulum membrane;endoplasmic reticulum part;Golgi apparatus part;Golgi membrane;intracellular organelle part;intracellular part;macromolecular complex;membrane;membrane coat;membrane part;organelle membrane;organelle part;protein complex;vesicle coat	cellular component organization;cellular membrane organization;cellular process;establishment of localization;membrane organization;organelle organization;protein transport;transport;vesicle organization	3	43	43	43	44.1	44.1	44.1	138.72	1273
P32356	TREA_YEAST	Neutral trehalase (EC 3.2.1.28) (Alpha,alpha-trehalase) (Alpha,alpha-trehalose glucohydrolase)	NTH1 NTH YDR001C YD8119.07C	0.741517	0.914602	-0.480001	-1.17612	alpha,alpha-trehalase activity;binding;calcium ion binding;catalytic activity;cation binding;hydrolase activity;hydrolase activity, acting on glycosyl bonds;hydrolase activity, hydrolyzing O-glycosyl compounds;ion binding;metal ion binding;trehalase activity	cell part;cytoplasm;intracellular part	carbohydrate metabolic process;catabolic process;cell communication;cellular metabolic process;cellular process;metabolic process;oligosaccharide metabolic process;primary metabolic process;response to abiotic stimulus;response to chemical stimulus;response to external stimulus;response to extracellular stimulus;response to stimulus;response to stress	3	43	43	40	66.2	66.2	61.8	85.878	751
P03962	PYRF_YEAST	Orotidine 5'-phosphate decarboxylase (EC 4.1.1.23) (OMP decarboxylase) (OMPDCase) (OMPdecase) (Uridine 5'-monophosphate synthase) (UMP synthase)	URA3 YEL021W	0.695199	0.931301	-0.409129	-1.21737	carbon-carbon lyase activity;carboxy-lyase activity;catalytic activity;lyase activity;orotidine-5'-phosphate decarboxylase activity	cell part;cytoplasmic part;cytosol;intracellular part	biosynthetic process;cellular aromatic compound metabolic process;cellular metabolic process;cellular nitrogen compound metabolic process;cellular process;heterocycle metabolic process;metabolic process;nitrogen compound metabolic process;nucleobase-containing compound metabolic process;nucleobase-containing small molecule metabolic process;nucleoside metabolic process;nucleotide metabolic proces…	3	25	25	25	80.5	80.5	80.5	29.239	267
P39101	CAJ1_YEAST	Protein CAJ1	CAJ1 YER048C	0.76744	0.841253	-0.351918	-1.25677		cell part;intracellular membrane-bounded organelle;intracellular organelle;intracellular part;membrane-bounded organelle;nucleus;organelle	cellular metabolic process;cellular process;macromolecule metabolic process;metabolic process;primary metabolic process;protein folding;protein metabolic process	3	18	18	18	54	54	54	44.854	391
P48836	VATG_YEAST	V-type proton ATPase subunit G (V-ATPase subunit G) (V-ATPase 13 kDa subunit) (Vacuolar proton pump subunit G)	VMA10 YHR039C-A YHR039BC YHR039C-B	0.701308	0.929058	-0.417708	-1.21266	active transmembrane transporter activity;ATPase activity;ATPase activity, coupled;ATPase activity, coupled to movement of substances;ATPase activity, coupled to transmembrane movement of ions;ATPase activity, coupled to transmembrane movement of substances;catalytic activity;cation transmembrane transporter activity;cation-transporting ATPase activity;hydrogen ion transmembrane transporter activ…	cell part;cytoplasmic part;intracellular organelle part;intracellular part;macromolecular complex;membrane part;organelle part;protein complex;proton-transporting two-sector ATPase complex, catalytic domain;proton-transporting V-type ATPase, V1 domain;vacuolar part;vacuolar proton-transporting V-type ATPase, V1 domain	biological regulation;cellular homeostasis;cellular ion homeostasis;cellular process;homeostatic process	3	9	9	9	47.4	47.4	47.4	12.713	114
P40029	MSRA_YEAST	Peptide methionine sulfoxide reductase (EC 1.8.4.11) (Peptide-methionine (S)-S-oxide reductase) (Peptide Met(O) reductase) (Protein-methionine-S-oxide reductase)	MXR1 YER042W	0.755621	0.885898	-0.435446	-1.20607	catalytic activity;oxidoreductase activity;oxidoreductase activity, acting on a sulfur group of donors;oxidoreductase activity, acting on a sulfur group of donors, disulfide as acceptor;peptide-methionine-(S)-S-oxide reductase activity	cell part;cytoplasm;intracellular part	cellular metabolic process;cellular process;macromolecule metabolic process;metabolic process;primary metabolic process;protein metabolic process;response to chemical stimulus;response to oxidative stress;response to stimulus;response to stress	3	17	17	17	84.2	84.2	84.2	21.141	184
P38427	TSL1_YEAST	Trehalose synthase complex regulatory subunit TSL1 (Alpha,alpha-trehalose-phosphate synthase [UDP-forming] 123 kDa subunit)	TSL1 YML100W	0.659413	0.984795	-0.473076	-1.17113	catalytic activity;enzyme regulator activity	alpha,alpha-trehalose-phosphate synthase complex (UDP-forming);cell part;cytoplasmic part;intracellular part;macromolecular complex;protein complex	biological regulation;biosynthetic process;carbohydrate metabolic process;cellular metabolic process;cellular process;metabolic process;oligosaccharide metabolic process;phosphorus metabolic process;primary metabolic process	3	53	53	51	54.3	54.3	52.6	123.02	1098
P38009	PUR92_YEAST	Bifunctional purine biosynthesis protein ADE17 [Includes: Phosphoribosylaminoimidazolecarboxamide formyltransferase (EC 2.1.2.3) (5-aminoimidazole-4-carboxamide ribonucleotide formyltransferase) (AICAR transformylase); IMP cyclohydrolase (EC 3.5.4.10) (ATIC) (IMP synthase) (Inosinicase)]	ADE17 YMR120C YM8564.02C	0.659609	0.971483	-0.434163	-1.19693	catalytic activity;cyclohydrolase activity;hydrolase activity;hydrolase activity, acting on carbon-nitrogen (but not peptide) bonds;hydrolase activity, acting on carbon-nitrogen (but not peptide) bonds, in cyclic amidines;hydroxymethyl-, formyl- and related transferase activity;IMP cyclohydrolase activity;phosphoribosylaminoimidazolecarboxamide formyltransferase activity;transferase activity;tran…	cell part;cytoplasmic part;cytosol;intracellular part	biosynthetic process;cellular metabolic process;cellular nitrogen compound metabolic process;cellular process;heterocycle metabolic process;metabolic process;nitrogen compound metabolic process;nucleobase-containing compound metabolic process;nucleobase-containing small molecule metabolic process;nucleotide metabolic process;primary metabolic process;small molecule metabolic process	3	43	43	36	81.8	81.8	74	65.262	592
P38250	IST2_YEAST	Increased sodium tolerance protein 2	IST2 YBR086C YBR0809	0.613445	1.02275	-0.472319	-1.16387	binding;lipid binding	cell cortex part;cell part;cellular bud membrane;cortical endoplasmic reticulum;cytoplasmic part;endoplasmic reticulum part;integral to membrane;intracellular organelle part;intracellular part;intrinsic to membrane;membrane;membrane part;organelle part;plasma membrane;plasma membrane part	biological regulation;cellular component organization;cellular localization;cellular membrane organization;cellular process;localization;membrane organization;plasma membrane organization	3	28	28	28	38.6	38.6	38.6	105.85	946
P38791	DHYS_YEAST	Deoxyhypusine synthase (DHS) (EC 2.5.1.46)	DYS1 YHR068W	0.634834	0.983734	-0.409677	-1.20889	catalytic activity;deoxyhypusine synthase activity;transferase activity;transferase activity, transferring alkyl or aryl (other than methyl) groups		amine metabolic process;biosynthetic process;catabolic process;cellular amino acid metabolic process;cellular ketone metabolic process;cellular metabolic process;cellular nitrogen compound metabolic process;cellular process;macromolecule metabolic process;macromolecule modification;metabolic process;nitrogen compound metabolic process;organic acid metabolic process;peptidyl-amino acid modificatio…	3	25	25	25	60.5	60.5	60.5	42.892	387
P36059	NNRD_YEAST	ATP-dependent (S)-NAD(P)H-hydrate dehydratase (EC 4.2.1.93) (ATP-dependent NAD(P)HX dehydratase)	YKL151C YKL606	0.651582	0.99046	-0.47011	-1.17193	adenyl nucleotide binding;adenyl ribonucleotide binding;ATP binding;ATP-dependent NAD(P)H-hydrate dehydratase activity;binding;carbon-oxygen lyase activity;catalytic activity;hydro-lyase activity;lyase activity;nucleotide binding;purine nucleotide binding;purine ribonucleoside triphosphate binding;purine ribonucleotide binding;ribonucleotide binding	cell part;cytoplasm;intracellular part	cellular metabolic process;cellular nitrogen compound metabolic process;cellular process;cofactor metabolic process;heterocycle metabolic process;metabolic process;nitrogen compound metabolic process;nucleobase-containing compound metabolic process;nucleobase-containing small molecule metabolic process;nucleotide metabolic process;primary metabolic process;small molecule metabolic process	3	23	23	23	61.1	61.1	61.1	37.357	337
P32939	YPT7_YEAST	GTP-binding protein YPT7	YPT7 VAM4 YML001W YM8270.02	0.634692	1.00162	-0.460961	-1.17535	binding;catalytic activity;GTP binding;GTPase activity;guanyl nucleotide binding;guanyl ribonucleotide binding;hydrolase activity;hydrolase activity, acting on acid anhydrides;hydrolase activity, acting on acid anhydrides, in phosphorus-containing anhydrides;nucleoside-triphosphatase activity;nucleotide binding;purine nucleotide binding;purine ribonucleoside triphosphate binding;purine ribonucleo…	cell part;cytoplasmic part;fungal-type vacuole;fungal-type vacuole membrane;intracellular membrane-bounded organelle;intracellular organelle;intracellular organelle part;intracellular part;lytic vacuole;membrane;membrane-bounded organelle;organelle;organelle membrane;organelle part;storage vacuole;vacuolar membrane;vacuolar part;vacuole	autophagy;biological regulation;catabolic process;cellular component organization;cellular localization;cellular membrane organization;cellular metabolic process;cellular process;endocytosis;endosome transport;establishment of localization;localization;membrane invagination;membrane organization;metabolic process;organelle inheritance;organelle organization;protein transport;regulation of organel…	3	9	9	9	60.6	60.6	60.6	23.042	208
Q04062	RPN9_YEAST	26S proteasome regulatory subunit RPN9 (Proteasome non-ATPase subunit 7)	RPN9 NAS7 YDR427W D9461.14	0.67745	0.965642	-0.46188	-1.18121	structural molecule activity	cell part;cytoplasmic part;cytosol;cytosolic part;cytosolic proteasome complex;intracellular membrane-bounded organelle;intracellular organelle;intracellular part;macromolecular complex;membrane-bounded organelle;nucleus;organelle;proteasome complex;proteasome regulatory particle, lid subcomplex;proteasome storage granule;protein complex	catabolic process;cellular component assembly;cellular component organization;cellular macromolecular complex assembly;cellular metabolic process;cellular process;macromolecular complex assembly;macromolecule metabolic process;metabolic process;primary metabolic process;protein complex assembly;protein metabolic process;proteolysis;proteolysis involved in cellular protein catabolic process	3	19	19	19	47.1	47.1	47.1	45.782	393
P13188	SYQ_YEAST	Glutamine--tRNA ligase (EC 6.1.1.18) (Glutaminyl-tRNA synthetase) (GlnRS)	GLN4 YOR168W O3601	0.665383	0.912543	-0.299265	-1.27866	adenyl nucleotide binding;adenyl ribonucleotide binding;aminoacyl-tRNA ligase activity;ATP binding;binding;catalytic activity;glutamine-tRNA ligase activity;ligase activity;ligase activity, forming aminoacyl-tRNA and related compounds;ligase activity, forming carbon-oxygen bonds;nucleotide binding;purine nucleotide binding;purine ribonucleoside triphosphate binding;purine ribonucleotide binding;r…	cell part;cytoplasmic part;cytosol;intracellular membrane-bounded organelle;intracellular organelle;intracellular part;membrane-bounded organelle;mitochondrion;organelle	amine metabolic process;cellular amino acid metabolic process;cellular ketone metabolic process;cellular metabolic process;cellular nitrogen compound metabolic process;cellular process;macromolecule metabolic process;metabolic process;nitrogen compound metabolic process;nucleobase-containing compound metabolic process;organic acid metabolic process;primary metabolic process;RNA metabolic process;…	3	63	63	63	62.2	62.2	62.2	93.132	809
P17695	GLRX2_YEAST	Glutaredoxin-2, mitochondrial (Glutathione-dependent oxidoreductase 2) (Thioltransferase)	GRX2 TTR TTR1 YDR513W D9719.17	0.660718	0.897521	-0.257654	-1.30059	antioxidant activity;catalytic activity;disulfide oxidoreductase activity;electron carrier activity;glutathione peroxidase activity;glutathione transferase activity;oxidoreductase activity;oxidoreductase activity, acting on a sulfur group of donors;oxidoreductase activity, acting on peroxide as acceptor;peroxidase activity;protein disulfide oxidoreductase activity;transferase activity;transferase…	cell part;cytoplasmic part;cytosol;intracellular membrane-bounded organelle;intracellular organelle;intracellular part;membrane-bounded organelle;mitochondrion;organelle	amine metabolic process;biological regulation;cellular amino acid metabolic process;cellular homeostasis;cellular ketone metabolic process;cellular metabolic process;cellular nitrogen compound metabolic process;cellular process;homeostatic process;metabolic process;nitrogen compound metabolic process;organic acid metabolic process;peptide metabolic process;primary metabolic process;response to ch…	3	10	10	10	72.7	72.7	72.7	15.861	143
Q04439	MYO5_YEAST	Myosin-5 (Actin-dependent myosin-I MYO5) (Class I unconventional myosin MYO5) (Type I myosin MYO5)	MYO5 YMR109W YM9718.08	0.6203	0.96541	-0.331348	-1.25436	adenyl nucleotide binding;adenyl ribonucleotide binding;ATP binding;binding;catalytic activity;hydrolase activity;hydrolase activity, acting on acid anhydrides;hydrolase activity, acting on acid anhydrides, in phosphorus-containing anhydrides;identical protein binding;microfilament motor activity;motor activity;nucleoside-triphosphatase activity;nucleotide binding;protein binding;purine nucleotid…	actin cortical patch;cell cortex part;cell part;cytoplasmic part;cytoskeletal part;intracellular organelle part;intracellular part;macromolecular complex;myosin complex;organelle part;protein complex	cell budding;cell division;cell wall organization;cell wall organization or biogenesis;cellular cell wall organization;cellular cell wall organization or biogenesis;cellular component organization;cellular localization;cellular membrane organization;cellular process;endocytosis;establishment of localization;establishment or maintenance of cell polarity;exocytosis;external encapsulating structure …	3	41	41	34	46.2	46.2	40.5	136.9	1219
P34167	IF4B_YEAST	Eukaryotic translation initiation factor 4B (eIF-4B)	TIF3 STM1 TIF42 YPR163C P9325.6	0.58197	1.08671	-0.624408	-1.04427	binding;double-stranded RNA binding;nucleic acid binding;nucleotide binding;ribonucleoprotein binding;ribosomal small subunit binding;RNA binding;RNA strand annealing activity;RNA strand-exchange activity;single-stranded RNA binding;translation factor activity, nucleic acid binding;translation initiation factor activity		biosynthetic process;cellular component assembly;cellular component organization;cellular macromolecular complex assembly;cellular metabolic process;cellular process;cytoplasmic translation;macromolecular complex assembly;macromolecule metabolic process;metabolic process;primary metabolic process;protein complex assembly;protein metabolic process;ribonucleoprotein complex assembly;translation;tra…	3	37	37	37	81	81	81	48.521	436
Q12377	RPN6_YEAST	26S proteasome regulatory subunit RPN6 (Proteasome non-ATPase subunit 4)	RPN6 NAS4 YDL097C D2381	0.509926	1.1452	-0.65612	-0.999003	structural molecule activity	cell part;cytoplasmic part;cytosolic part;cytosolic proteasome complex;intracellular part;macromolecular complex;proteasome complex;proteasome regulatory particle, lid subcomplex;proteasome storage granule;protein complex	catabolic process;cellular component assembly;cellular component organization;cellular macromolecular complex assembly;cellular metabolic process;cellular process;macromolecular complex assembly;macromolecule metabolic process;metabolic process;primary metabolic process;protein complex assembly;protein metabolic process;proteolysis;proteolysis involved in cellular protein catabolic process	3	24	24	24	63.8	63.8	63.8	49.773	434
P31787	ACBP_YEAST	Acyl-CoA-binding protein (ACBP)	ACB1 ACB YGR037C	0.5302	1.12723	-0.635454	-1.02198	binding;carboxylic acid binding;coenzyme binding;cofactor binding;fatty acid binding;fatty acid transporter activity;fatty-acyl-CoA binding;lipid binding;lipid transporter activity;long-chain fatty acid transporter activity;monocarboxylic acid binding;substrate-specific transporter activity;transporter activity	extracellular region	aging;cellular process;developmental process;establishment of localization;lipid transport;organic acid transport;transport	3	11	11	11	94.3	94.3	94.3	10.061	87
P35844	KES1_YEAST	Oxysterol-binding protein homolog 4 (Protein KES1)	KES1 OSH4 YPL145C LPI3C P2614	0.523056	1.12866	-0.615536	-1.03618	binding;lipid binding;lipid transporter activity;oxysterol binding;phosphatidic acid binding;phosphatidylinositol binding;phosphatidylinositol-4,5-bisphosphate binding;phosphatidylinositol-4-phosphate binding;phospholipid binding;steroid binding;sterol binding;sterol transporter activity;substrate-specific transporter activity;transporter activity	cell part;cytoplasm;cytoplasmic part;extrinsic to membrane;Golgi apparatus part;Golgi membrane;intracellular organelle part;intracellular part;membrane;membrane part;organelle membrane;organelle part	alcohol metabolic process;biological regulation;biosynthetic process;cellular component organization;cellular lipid metabolic process;cellular membrane organization;cellular metabolic process;cellular process;endocytosis;establishment of localization;establishment or maintenance of cell polarity;exocytosis;Golgi vesicle transport;lipid metabolic process;lipid transport;membrane invagination;membr…	3	22	22	22	59.2	59.2	59.2	49.491	434
P09436	SYIC_YEAST	Isoleucine--tRNA ligase, cytoplasmic (EC 6.1.1.5) (Isoleucyl-tRNA synthetase) (IleRS)	ILS1 YBL076C YBL0734	0.547932	1.06753	-0.450469	-1.165	adenyl nucleotide binding;adenyl ribonucleotide binding;aminoacyl-tRNA editing activity;aminoacyl-tRNA ligase activity;ATP binding;binding;carboxylic ester hydrolase activity;catalytic activity;hydrolase activity;hydrolase activity, acting on ester bonds;isoleucine-tRNA ligase activity;ligase activity;ligase activity, forming aminoacyl-tRNA and related compounds;ligase activity, forming carbon-ox…	cell part;cytoplasmic part;cytosol;intracellular part	amine metabolic process;cellular amino acid metabolic process;cellular ketone metabolic process;cellular metabolic process;cellular nitrogen compound metabolic process;cellular process;macromolecule metabolic process;metabolic process;nitrogen compound metabolic process;nucleobase-containing compound metabolic process;organic acid metabolic process;primary metabolic process;RNA metabolic process;…	3	78	78	78	68.7	68.7	68.7	122.98	1072
P35732	DEF1_YEAST	RNA polymerase II degradation factor 1 (RRM3-interacting protein 1)	DEF1 RIP1 VID31 YKL054C YKL308	0.578078	1.0658	-0.523004	-1.12088	binding;DNA binding;nucleic acid binding	cell part;chromosomal part;chromosome, telomeric region;intracellular membrane-bounded organelle;intracellular organelle;intracellular organelle part;intracellular part;membrane-bounded organelle;nucleus;organelle;organelle part	biological regulation;catabolic process;cellular component organization;cellular metabolic process;cellular nitrogen compound metabolic process;cellular process;chromosome organization;DNA metabolic process;DNA repair;homeostatic process;macromolecule metabolic process;macromolecule modification;metabolic process;nitrogen compound metabolic process;nucleobase-containing compound metabolic process…	3	11	11	11	22.4	22.4	22.4	83.972	738
P46367	ALDH4_YEAST	Potassium-activated aldehyde dehydrogenase, mitochondrial (EC 1.2.1.5) (K(+)-activated acetaldehyde dehydrogenase) (K(+)-ACDH)	ALD4 ALD7 ALDH2 YOR374W O6730	0.55623	1.07729	-0.50383	-1.12969	aldehyde dehydrogenase (NAD) activity;aldehyde dehydrogenase [NAD(P)+] activity;catalytic activity;oxidoreductase activity;oxidoreductase activity, acting on the aldehyde or oxo group of donors;oxidoreductase activity, acting on the aldehyde or oxo group of donors, NAD or NADP as acceptor	cell part;cytoplasmic part;intracellular membrane-bounded organelle;intracellular non-membrane-bounded organelle;intracellular organelle;intracellular organelle part;intracellular part;membrane-bounded organelle;mitochondrial nucleoid;mitochondrial part;mitochondrion;non-membrane-bounded organelle;nucleoid;organelle;organelle part	alcohol metabolic process;biosynthetic process;cellular ketone metabolic process;cellular metabolic process;cellular nitrogen compound metabolic process;cellular process;cofactor metabolic process;heterocycle metabolic process;metabolic process;nitrogen compound metabolic process;nucleobase-containing compound metabolic process;nucleobase-containing small molecule metabolic process;nucleotide met…	3	35	35	33	75.3	75.3	73.6	56.723	519
Q03640	TCB3_YEAST	Tricalbin-3	TCB3 YML072C	0.502596	1.123	-0.525597	-1.1	binding;calcium-dependent phospholipid binding;cation binding;ion binding;lipid binding;metal ion binding;phospholipid binding	cell cortex part;cell part;cellular bud;cortical endoplasmic reticulum;cytoplasmic part;endoplasmic reticulum part;integral to membrane;intracellular organelle part;intracellular part;intrinsic to membrane;membrane part;organelle part	biological regulation;cellular component organization;cellular membrane organization;cellular process;membrane organization	3	58	58	58	53.2	53.2	53.2	171.07	1545
Q12118	SGT2_YEAST	Small glutamine-rich tetratricopeptide repeat-containing protein 2 (SGT/UBP) (Viral protein U-binding protein)	SGT2 YOR007C UNF346	0.485688	1.13999	-0.545335	-1.08034	binding;protein binding;protein complex scaffold;structural molecule activity	cell part;cytoplasmic part;cytosolic part;ER membrane insertion complex;intracellular part;macromolecular complex;protein complex;TRC complex	establishment of localization;protein targeting;protein transport;response to abiotic stimulus;response to heat;response to stimulus;response to stress;transport	3	30	30	30	88.7	88.7	88.7	37.218	346
P18544	ARGD_YEAST	Acetylornithine aminotransferase, mitochondrial (ACOAT) (EC 2.6.1.11)	ARG8 YOL140W	0.475752	1.13018	-0.48139	-1.12455	binding;catalytic activity;cofactor binding;N2-acetyl-L-ornithine:2-oxoglutarate 5-aminotransferase activity;pyridoxal phosphate binding;transaminase activity;transferase activity;transferase activity, transferring nitrogenous groups;vitamin B6 binding;vitamin binding	cell part;cytoplasmic part;intracellular organelle lumen;intracellular organelle part;intracellular part;membrane-enclosed lumen;mitochondrial matrix;mitochondrial part;organelle lumen;organelle part	amine metabolic process;biosynthetic process;cellular amino acid metabolic process;cellular ketone metabolic process;cellular metabolic process;cellular nitrogen compound metabolic process;cellular process;metabolic process;nitrogen compound metabolic process;organic acid metabolic process;primary metabolic process;small molecule metabolic process	3	19	19	19	67.6	67.6	67.6	46.681	423
P35191	MDJ1_YEAST	DnaJ homolog 1, mitochondrial	MDJ1 YFL016C	0.478766	1.14826	-0.559852	-1.06717	adenyl nucleotide binding;adenyl ribonucleotide binding;ATP binding;ATPase activator activity;ATPase regulator activity;binding;cation binding;enzyme activator activity;enzyme regulator activity;ion binding;metal ion binding;nucleoside-triphosphatase regulator activity;nucleotide binding;protein binding;purine nucleotide binding;purine ribonucleoside triphosphate binding;purine ribonucleotide bin…	cell part;cytoplasmic part;extrinsic to membrane;extrinsic to mitochondrial inner membrane;extrinsic to organelle membrane;intracellular organelle lumen;intracellular organelle part;intracellular part;membrane part;membrane-enclosed lumen;mitochondrial matrix;mitochondrial membrane part;mitochondrial part;organelle lumen;organelle part	biological regulation;cellular component organization;cellular metabolic process;cellular process;macromolecule metabolic process;metabolic process;mitochondrion organization;organelle organization;primary metabolic process;protein folding;protein metabolic process;proteolysis;proteolysis involved in cellular protein catabolic process;response to abiotic stimulus;response to heat;response to stim…	3	23	23	23	50.1	50.1	50.1	55.56	511
P40825	SYA_YEAST	Alanine--tRNA ligase, mitochondrial (EC 6.1.1.7) (Alanyl-tRNA synthetase) (AlaRS)	ALA1 CDC64 YOR335C	0.450997	1.12008	-0.393177	-1.1779	adenyl nucleotide binding;adenyl ribonucleotide binding;alanine-tRNA ligase activity;aminoacyl-tRNA ligase activity;ATP binding;binding;catalytic activity;cation binding;ion binding;ligase activity;ligase activity, forming aminoacyl-tRNA and related compounds;ligase activity, forming carbon-oxygen bonds;metal ion binding;nucleic acid binding;nucleotide binding;purine nucleotide binding;purine rib…	cell part;cytoplasm;cytoplasmic part;intracellular membrane-bounded organelle;intracellular organelle;intracellular part;membrane-bounded organelle;mitochondrion;organelle	amine metabolic process;cellular amino acid metabolic process;cellular ketone metabolic process;cellular metabolic process;cellular nitrogen compound metabolic process;cellular process;macromolecule metabolic process;metabolic process;nitrogen compound metabolic process;nucleobase-containing compound metabolic process;organic acid metabolic process;primary metabolic process;RNA metabolic process;…	3	61	61	61	64.1	64.1	64.1	110.06	983
P15625	SYFA_YEAST	Phenylalanine--tRNA ligase alpha subunit (EC 6.1.1.20) (Phenylalanyl-tRNA synthetase alpha subunit) (PheRS)	FRS2 YFL022C	0.503166	1.0907	-0.418125	-1.17574	adenyl nucleotide binding;adenyl ribonucleotide binding;aminoacyl-tRNA ligase activity;ATP binding;binding;catalytic activity;ligase activity;ligase activity, forming aminoacyl-tRNA and related compounds;ligase activity, forming carbon-oxygen bonds;nucleic acid binding;nucleotide binding;phenylalanine-tRNA ligase activity;purine nucleotide binding;purine ribonucleoside triphosphate binding;purine…	cell part;cytoplasmic part;intracellular part;macromolecular complex;phenylalanine-tRNA ligase complex;protein complex	amine metabolic process;cellular amino acid metabolic process;cellular ketone metabolic process;cellular metabolic process;cellular nitrogen compound metabolic process;cellular process;macromolecule metabolic process;metabolic process;nitrogen compound metabolic process;nucleobase-containing compound metabolic process;organic acid metabolic process;primary metabolic process;RNA metabolic process;…	3	29	29	29	62.6	62.6	62.6	57.511	503
P32527	ZUO1_YEAST	Zuotin (DnaJ-related protein ZUO1) (J protein ZUO1) (Heat shock protein 40 homolog ZUO1) (Ribosome-associated complex subunit ZUO1)	ZUO1 YGR285C	0.471941	1.10653	-0.397403	-1.18107	binding;DNA binding;nucleic acid binding;protein binding;ribonucleoprotein binding;ribosome binding;unfolded protein binding	cell part;cytoplasm;cytoplasmic part;intracellular non-membrane-bounded organelle;intracellular organelle;intracellular organelle part;intracellular part;macromolecular complex;non-membrane-bounded organelle;nuclear part;nucleolus;organelle;organelle part;polysome;ribonucleoprotein complex;ribosome	biological regulation;cellular localization;cellular metabolic process;cellular nitrogen compound metabolic process;cellular process;establishment of localization;localization;macromolecule metabolic process;metabolic process;nitrogen compound metabolic process;nuclear transport;nucleobase-containing compound metabolic process;nucleocytoplasmic transport;primary metabolic process;protein folding;…	3	30	30	30	57.3	57.3	57.3	49.019	433
P06105	SC160_YEAST	Protein SCP160 (Protein HX)	SCP160 HX YJL080C J1017	0.494966	1.06705	-0.335778	-1.22624	binding;G-protein alpha-subunit binding;mRNA binding;nucleic acid binding;protein binding;RNA binding	cell part;cytoplasm;cytoplasmic part;endoplasmic reticulum;endoplasmic reticulum membrane;endoplasmic reticulum part;intracellular membrane-bounded organelle;intracellular organelle;intracellular organelle part;intracellular part;macromolecular complex;membrane;membrane part;membrane-bounded organelle;nuclear membrane;nuclear outer membrane-endoplasmic reticulum membrane network;nuclear part;orga…	biological regulation;cellular component organization;cellular localization;cellular process;chromosome organization;chromosome segregation;gene silencing;localization;multicellular organismal process;organelle organization;regulation of gene expression, epigenetic;response to chemical stimulus;response to external stimulus;response to stimulus;signal transduction;tropism	3	86	86	86	67	67	67	134.81	1222
P28319	CWP1_YEAST	Cell wall protein CWP1 (Glycoprotein GP40)	CWP1 YKL096W YJU1 YKL443	0.37281	1.12439	-0.260769	-1.23643	structural constituent of cell wall;structural molecule activity	anchored to membrane;cell part;cell wall;cell wall part;cellular birth scar;external encapsulating structure;external encapsulating structure part;extracellular region;fungal-type cell wall;intrinsic to membrane;membrane;membrane part;prospore membrane	anatomical structure formation involved in morphogenesis;cell wall organization;cell wall organization or biogenesis;cellular cell wall organization;cellular cell wall organization or biogenesis;cellular component assembly;cellular component organization;cellular membrane organization;cellular process;developmental process;external encapsulating structure organization;membrane organization	3	11	11	11	42.3	42.3	42.3	24.268	239
P22147	XRN1_YEAST	5'-3' exoribonuclease 1 (EC 3.1.13.-) (DNA strand transfer protein beta) (STP-beta) (KAR(-)-enhancing mutation protein) (Strand exchange protein 1) (p175)	XRN1 DST2 KEM1 RAR5 SEP1 SKI1 YGL173C G1645	0.500398	1.05193	-0.30809	-1.24424	5'-3' exonuclease activity;5'-3' exoribonuclease activity;binding;catalytic activity;chromatin binding;exonuclease activity;exonuclease activity, active with either ribo- or deoxyribonucleic acids and producing 5'-phosphomonoesters;exoribonuclease activity;exoribonuclease activity, producing 5'-phosphomonoesters;hydrolase activity;hydrolase activity, acting on ester bonds;nuclease activity;nuclei…	cell part;cytoplasm;cytoplasmic mRNA processing body;cytoplasmic part;cytoskeletal part;cytosol;intracellular membrane-bounded organelle;intracellular non-membrane-bounded organelle;intracellular organelle;intracellular organelle part;intracellular part;macromolecular complex;membrane-bounded organelle;microtubule;non-membrane-bounded organelle;nucleus;organelle;organelle part;perinuclear region …	biological regulation;catabolic process;cellular component organization;cellular metabolic process;cellular nitrogen compound metabolic process;cellular process;macromolecule metabolic process;metabolic process;mRNA metabolic process;nitrogen compound metabolic process;nucleobase-containing compound metabolic process;organelle fusion;organelle organization;primary metabolic process;regulation of …	3	59	59	59	42.3	42.3	42.3	175.46	1528
P33327	DHE2_YEAST	NAD-specific glutamate dehydrogenase (NAD-GDH) (EC 1.4.1.2)	GDH2 YDL215C D0892	0.298663	1.20338	-0.341977	-1.16006	catalytic activity;glutamate dehydrogenase (NAD+) activity;oxidoreductase activity;oxidoreductase activity, acting on the CH-NH2 group of donors;oxidoreductase activity, acting on the CH-NH2 group of donors, NAD or NADP as acceptor		amine metabolic process;catabolic process;cellular amino acid metabolic process;cellular ketone metabolic process;cellular metabolic process;cellular nitrogen compound metabolic process;cellular process;metabolic process;nitrogen compound metabolic process;organic acid metabolic process;primary metabolic process;small molecule metabolic process	3	48	48	48	53.4	53.4	53.4	124.33	1092
P04802	SYDC_YEAST	Aspartate--tRNA ligase, cytoplasmic (EC 6.1.1.12) (Aspartyl-tRNA synthetase) (AspRS)	DPS1 APS APS1 YLL018C L1295	0.14042	1.32218	-0.446217	-1.01638	adenyl nucleotide binding;adenyl ribonucleotide binding;aminoacyl-tRNA ligase activity;aspartate-tRNA ligase activity;ATP binding;binding;catalytic activity;ligase activity;ligase activity, forming aminoacyl-tRNA and related compounds;ligase activity, forming carbon-oxygen bonds;nucleic acid binding;nucleotide binding;purine nucleotide binding;purine ribonucleoside triphosphate binding;purine rib…	cell part;cytoplasm;intracellular membrane-bounded organelle;intracellular organelle;intracellular part;membrane-bounded organelle;nucleus;organelle	amine metabolic process;cellular amino acid metabolic process;cellular ketone metabolic process;cellular metabolic process;cellular nitrogen compound metabolic process;cellular process;macromolecule metabolic process;metabolic process;nitrogen compound metabolic process;nucleobase-containing compound metabolic process;organic acid metabolic process;primary metabolic process;RNA metabolic process;…	3	47	47	47	70.4	70.4	70.4	63.515	557
P40106	GPP2_YEAST	Glycerol-1-phosphate phosphohydrolase 2 (EC 3.1.3.21) ((DL)-glycerol-3-phosphatase 2) (Hyperosmolarity-responsive protein 2)	GPP2 HOR2 YER062C	0.24957	1.27353	-0.482318	-1.04078	binding;catalytic activity;cation binding;glycerol-1-phosphatase activity;hydrolase activity;hydrolase activity, acting on ester bonds;ion binding;metal ion binding;phosphatase activity;phosphoric ester hydrolase activity	cell part;cytoplasm;intracellular membrane-bounded organelle;intracellular organelle;intracellular part;membrane-bounded organelle;nucleus;organelle	alcohol metabolic process;biosynthetic process;carbohydrate metabolic process;cellular metabolic process;cellular process;metabolic process;phosphorus metabolic process;primary metabolic process;response to abiotic stimulus;response to osmotic stress;response to stimulus;response to stress;small molecule metabolic process	3	26	14	14	82.8	57.2	57.2	27.813	250
P38845	CRP1_YEAST	Cruciform DNA-recognizing protein 1 [Cleaved into: CRP1 short N-terminal subpeptide; CRP1 short C-terminal subpeptide]	CRP1 YHR146W	0.0334981	1.30182	-0.213465	-1.12186	binding;DNA binding;nucleic acid binding	cell part;intracellular membrane-bounded organelle;intracellular organelle;intracellular part;membrane-bounded organelle;nucleus;organelle		3	25	25	25	57	57	57	51.115	465
P33322	CBF5_YEAST	H/ACA ribonucleoprotein complex subunit 4 (EC 5.4.99.-) (Centromere-binding factor 5) (Centromere/microtubule-binding protein CBF5) (H/ACA snoRNP protein CBF5) (Small nucleolar RNP protein CBF5) (p64')	CBF5 YLR175W L9470.11	0.158043	1.2963	-0.382888	-1.07146	binding;catalytic activity;DNA binding;intramolecular transferase activity;isomerase activity;nucleic acid binding;pseudouridine synthase activity;RNA binding	box H/ACA RNP complex;box H/ACA snoRNP complex;cell part;chromosomal part;chromosome, centromeric region;cytoplasm;cytoskeletal part;intracellular non-membrane-bounded organelle;intracellular organelle;intracellular organelle part;intracellular part;macromolecular complex;microtubule;non-membrane-bounded organelle;nuclear part;nucleolar part;nucleolus;organelle;organelle part;protein complex;ribo…	cell division;cellular component organization;cellular metabolic process;cellular nitrogen compound metabolic process;cellular process;macromolecule metabolic process;macromolecule modification;metabolic process;mitosis;nitrogen compound metabolic process;nuclear division;nucleobase-containing compound metabolic process;organelle fission;organelle organization;primary metabolic process;RNA metabo…	3	26	26	26	60	60	60	54.704	483
P11484	SSB1_YEAST	Ribosome-associated molecular chaperone SSB1 (EC 3.6.4.10) (Cold-inducible protein YG101) (Heat shock protein SSB1) (Hsp70 chaperone Ssb)	SSB1 YG101 YDL229W	0.891646	0.839523	-0.836463	-0.894706	adenyl nucleotide binding;adenyl ribonucleotide binding;ATP binding;ATPase activity;binding;calmodulin binding;catalytic activity;hydrolase activity;hydrolase activity, acting on acid anhydrides;hydrolase activity, acting on acid anhydrides, in phosphorus-containing anhydrides;nucleoside-triphosphatase activity;nucleotide binding;protein binding;purine nucleotide binding;purine ribonucleoside tri…	cell part;cytoplasm;intracellular part;macromolecular complex;polysome;ribonucleoprotein complex	biological regulation;biosynthetic process;cell communication;cellular component disassembly;cellular component organization;cellular localization;cellular metabolic process;cellular nitrogen compound metabolic process;cellular process;cytoplasmic translation;establishment of localization;localization;macromolecule metabolic process;metabolic process;nitrogen compound metabolic process;nuclear tr…	3	62	3	3	79.8	10	10	66.601	613
P19414	ACON_YEAST	Aconitate hydratase, mitochondrial (Aconitase) (EC 4.2.1.3) (Citrate hydro-lyase)	ACO1 GLU1 YLR304C L8003.22	0.849027	0.88127	-0.812459	-0.917838	4 iron, 4 sulfur cluster binding;aconitate hydratase activity;binding;carbon-oxygen lyase activity;catalytic activity;cation binding;DNA binding;double-stranded DNA binding;hydro-lyase activity;ion binding;iron-sulfur cluster binding;lyase activity;metal cluster binding;metal ion binding;nucleic acid binding;single-stranded DNA binding;structure-specific DNA binding	cell part;cytoplasmic part;cytosol;intracellular non-membrane-bounded organelle;intracellular organelle;intracellular organelle lumen;intracellular organelle part;intracellular part;membrane-enclosed lumen;mitochondrial intermembrane space;mitochondrial matrix;mitochondrial nucleoid;mitochondrial part;non-membrane-bounded organelle;nucleoid;organelle;organelle envelope lumen;organelle lumen;organ…	catabolic process;cellular component organization;cellular metabolic process;cellular process;cofactor metabolic process;metabolic process;mitochondrion organization;organelle organization	3	48	48	46	62.2	62.2	61.2	85.367	778
P38764	RPN1_YEAST	26S proteasome regulatory subunit RPN1 (HMG-CoA reductase degradation protein 2) (Proteasome non-ATPase subunit 1)	RPN1 HRD2 NAS1 RPD1 YHR027C	0.842568	0.888568	-0.83311	-0.898027	binding;binding, bridging;enzyme regulator activity;protein binding;protein binding, bridging	cell part;cytoplasmic part;cytosolic part;cytosolic proteasome complex;intracellular membrane-bounded organelle;intracellular organelle;intracellular part;macromolecular complex;membrane-bounded organelle;nucleus;organelle;proteasome complex;proteasome regulatory particle, base subcomplex;proteasome storage granule;protein complex	biological regulation;catabolic process;cellular metabolic process;cellular process;macromolecule metabolic process;metabolic process;primary metabolic process;protein metabolic process;proteolysis;proteolysis involved in cellular protein catabolic process	3	41	41	41	50.9	50.9	50.9	109.49	993
P39726	GCSH_YEAST	Glycine cleavage system H protein, mitochondrial (Glycine decarboxylase complex subunit H)	GCV3 YAL044C FUN40	0.914944	0.814941	-0.829624	-0.900262		cell part;cytoplasmic part;glycine cleavage complex;intracellular membrane-bounded organelle;intracellular organelle;intracellular part;macromolecular complex;membrane-bounded organelle;mitochondrion;organelle;protein complex	amine metabolic process;catabolic process;cellular amino acid metabolic process;cellular ketone metabolic process;cellular metabolic process;cellular nitrogen compound metabolic process;cellular process;macromolecule metabolic process;macromolecule modification;metabolic process;nitrogen compound metabolic process;one-carbon metabolic process;organic acid metabolic process;primary metabolic proce…	3	6	6	6	54.7	54.7	54.7	18.793	170
P47044	YJF5_YEAST	LOG family protein YJL055W	YJL055W J1148	0.863612	0.868182	-0.844925	-0.886869			cellular process;response to chemical stimulus;response to drug;response to stimulus	3	10	10	10	56.7	56.7	56.7	26.864	245
P33299	PRS7_YEAST	26S protease regulatory subunit 7 homolog (Protein CIM5) (Tat-binding homolog 3)	RPT1 CIM5 YTA3 YKL145W	0.901084	0.820492	-0.732479	-0.989098	adenyl nucleotide binding;adenyl ribonucleotide binding;ATP binding;ATPase activity;binding;catalytic activity;hydrolase activity;hydrolase activity, acting on acid anhydrides;hydrolase activity, acting on acid anhydrides, in phosphorus-containing anhydrides;nucleoside-triphosphatase activity;nucleotide binding;purine nucleotide binding;purine ribonucleoside triphosphate binding;purine ribonucleo…	cell part;cytoplasm;intracellular membrane-bounded organelle;intracellular organelle;intracellular part;macromolecular complex;membrane-bounded organelle;nucleus;organelle;proteasome regulatory particle, base subcomplex;protein complex	biological regulation;catabolic process;cellular component assembly;cellular component organization;cellular macromolecular complex assembly;cellular metabolic process;cellular process;macromolecular complex assembly;macromolecule metabolic process;metabolic process;primary metabolic process;protein complex assembly;protein metabolic process;proteolysis;proteolysis involved in cellular protein ca…	3	26	26	26	56.1	56.1	56.1	51.982	467
P07143	CY1_YEAST	Cytochrome c1, heme protein, mitochondrial (Complex III subunit 4) (Complex III subunit IV) (Cytochrome b-c1 complex subunit 4) (Ubiquinol-cytochrome-c reductase complex cytochrome c1 subunit) (Cytochrome c-1)	CYT1 CTC1 YOR065W YOR29-16	0.938224	0.77462	-0.693967	-1.01888	binding;cation binding;electron carrier activity;electron transporter, transferring electrons within CoQH2-cytochrome c reductase complex activity;heme binding;ion binding;iron ion binding;metal ion binding;tetrapyrrole binding;transition metal ion binding	cell part;cytoplasmic part;cytosol;intracellular organelle part;intracellular part;macromolecular complex;membrane;membrane part;membrane-enclosed lumen;mitochondrial inner membrane;mitochondrial intermembrane space;mitochondrial membrane;mitochondrial membrane part;mitochondrial part;mitochondrial respiratory chain;mitochondrial respiratory chain complex III;organelle envelope lumen;organelle in…	cellular metabolic process;cellular process;generation of precursor metabolites and energy;metabolic process;oxidative phosphorylation;phosphorus metabolic process	3	9	9	9	40.1	40.1	40.1	34.054	309
P29704	FDFT_YEAST	Squalene synthase (SQS) (SS) (EC 2.5.1.21) (FPP:FPP farnesyltransferase) (Farnesyl-diphosphate farnesyltransferase)	ERG9 YHR190W	0.912211	0.813453	-0.770073	-0.955591	catalytic activity;farnesyl-diphosphate farnesyltransferase activity;farnesyltranstransferase activity;oxidoreductase activity;prenyltransferase activity;squalene synthase activity;transferase activity;transferase activity, transferring alkyl or aryl (other than methyl) groups	cell part;cytoplasmic part;endoplasmic reticulum membrane;endoplasmic reticulum part;integral to membrane;intracellular organelle part;intracellular part;intrinsic to membrane;membrane;membrane part;organelle membrane;organelle part	alcohol metabolic process;biosynthetic process;cellular lipid metabolic process;cellular metabolic process;cellular process;lipid metabolic process;metabolic process;primary metabolic process;small molecule metabolic process	3	22	22	22	46.4	46.4	46.4	51.719	444
P38205	NCL1_YEAST	Multisite-specific tRNA:(cytosine-C(5))-methyltransferase (EC 2.1.1.202) (Multisite-specific tRNA:m5C-methyltransferase) (tRNA (cytosine-5-)-methyltransferase NCL1) (tRNA methyltransferase 4)	NCL1 TRM4 YBL024W YBL0437	0.812495	0.908895	-0.733863	-0.987527	binding;catalytic activity;methyltransferase activity;nucleic acid binding;RNA binding;RNA methyltransferase activity;S-adenosylmethionine-dependent methyltransferase activity;transferase activity;transferase activity, transferring one-carbon groups;tRNA (cytosine) methyltransferase activity;tRNA (cytosine-5-)-methyltransferase activity;tRNA binding;tRNA methyltransferase activity	cell part;intracellular membrane-bounded organelle;intracellular non-membrane-bounded organelle;intracellular organelle;intracellular organelle part;intracellular part;membrane-bounded organelle;non-membrane-bounded organelle;nuclear part;nucleolus;nucleus;organelle;organelle part	cellular metabolic process;cellular nitrogen compound metabolic process;cellular process;macromolecule metabolic process;macromolecule modification;metabolic process;nitrogen compound metabolic process;nucleobase-containing compound metabolic process;one-carbon metabolic process;primary metabolic process;response to chemical stimulus;response to oxidative stress;response to stimulus;response to s…	3	34	34	34	62.3	62.3	62.3	77.878	684
P33297	PRS6A_YEAST	26S protease regulatory subunit 6A (Tat-binding protein homolog 1) (TBP-1)	RPT5 YTA1 YOR117W O3258 YOR3258W	0.879256	0.835371	-0.685422	-1.0292	adenyl nucleotide binding;adenyl ribonucleotide binding;ATP binding;ATPase activity;binding;catalytic activity;hydrolase activity;hydrolase activity, acting on acid anhydrides;hydrolase activity, acting on acid anhydrides, in phosphorus-containing anhydrides;nucleoside-triphosphatase activity;nucleotide binding;purine nucleotide binding;purine ribonucleoside triphosphate binding;purine ribonucleo…	cell part;cytoplasm;intracellular membrane-bounded organelle;intracellular organelle;intracellular part;macromolecular complex;membrane-bounded organelle;nucleus;organelle;proteasome regulatory particle, base subcomplex;protein complex	biological regulation;catabolic process;cellular component assembly;cellular component organization;cellular macromolecular complex assembly;cellular metabolic process;cellular process;macromolecular complex assembly;macromolecule metabolic process;metabolic process;primary metabolic process;protein complex assembly;protein metabolic process;proteolysis;proteolysis involved in cellular protein ca…	3	29	29	29	72.6	72.6	72.6	48.255	434
Q04792	DCE_YEAST	Glutamate decarboxylase (GAD) (EC 4.1.1.15)	GAD1 YMR250W YM9920.04	0.840703	0.879096	-0.715753	-1.00405	binding;carbon-carbon lyase activity;carboxy-lyase activity;catalytic activity;cofactor binding;glutamate decarboxylase activity;lyase activity;pyridoxal phosphate binding;vitamin B6 binding;vitamin binding		amine metabolic process;catabolic process;cellular amino acid metabolic process;cellular ketone metabolic process;cellular metabolic process;cellular nitrogen compound metabolic process;cellular process;metabolic process;nitrogen compound metabolic process;organic acid metabolic process;primary metabolic process;response to chemical stimulus;response to oxidative stress;response to stimulus;respo…	3	27	27	27	56.8	56.8	56.8	65.989	585
Q96VH5	MIC10_YEAST	MICOS complex subunit MIC10 (Mitochondrial contact site complex 10 kDa subunit) (Mitochondrial inner membrane organization component of 10 kDa) (Mitochondrial organizing structure protein 1) (MitOS1)	MIC10 MCS10 MIO10 MOS1 YCL057C-A	0.877628	0.841575	-0.711796	-1.00741		cell part;crista junction;cytoplasmic part;intracellular organelle part;intracellular part;mitochondrial part;organelle part	cellular component organization;cellular membrane organization;cellular process;membrane organization;mitochondrion organization;organelle organization	3	5	5	5	39.2	39.2	39.2	10.408	97
P39743	RV167_YEAST	Reduced viability upon starvation protein 167	RVS167 YDR388W D9509.8	0.799497	0.921975	-0.740249	-0.981223	binding;cytoskeletal protein binding;identical protein binding;protein binding	actin cortical patch;cell cortex part;cell part;cell projection part;cytoplasmic part;cytoskeletal part;intracellular organelle part;intracellular part;mating projection tip;organelle part;site of polarized growth	cellular component assembly;cellular component organization;cellular localization;cellular macromolecular complex assembly;cellular membrane organization;cellular process;endocytosis;establishment of localization;localization;macromolecular complex assembly;membrane invagination;membrane organization;transport;vesicle-mediated transport	3	20	20	20	37.6	37.6	37.6	52.774	482
Q04438	SPG4_YEAST	Stationary phase protein 4	SPG4 YMR107W YM9718.06	0.80193	0.922469	-0.960136	-0.764263				3	9	9	9	83.5	83.5	83.5	13.18	115
P33416	HSP78_YEAST	Heat shock protein 78, mitochondrial	HSP78 YDR258C YD9320A.08C	0.818879	0.906474	-0.96096	-0.764393	adenyl nucleotide binding;adenyl ribonucleotide binding;ATP binding;ATPase activity;binding;catalytic activity;hydrolase activity;hydrolase activity, acting on acid anhydrides;hydrolase activity, acting on acid anhydrides, in phosphorus-containing anhydrides;misfolded protein binding;nucleoside-triphosphatase activity;nucleotide binding;protein binding;purine nucleotide binding;purine ribonucleos…	cell part;cytoplasmic part;intracellular organelle lumen;intracellular organelle part;intracellular part;membrane-enclosed lumen;mitochondrial matrix;mitochondrial part;organelle lumen;organelle part	biological regulation;cellular component organization;cellular metabolic process;cellular process;macromolecule metabolic process;metabolic process;mitochondrion organization;organelle organization;primary metabolic process;protein folding;protein metabolic process;regulation of protein stability;response to abiotic stimulus;response to heat;response to stimulus;response to stress	3	70	69	69	67.3	67.3	67.3	91.335	811
P46680	AIP1_YEAST	Actin-interacting protein 1	AIP1 YMR092C YM9582.17C	0.738382	0.984178	-0.897192	-0.825368	actin binding;binding;cytoskeletal protein binding;protein binding	actin cortical patch;actin filament;cell cortex part;cell part;cytoplasmic part;cytoskeletal part;intracellular organelle part;intracellular part;macromolecular complex;organelle part;protein complex	biological regulation;cellular component disassembly;cellular component organization;cellular process;cytoskeleton organization;organelle organization;protein depolymerization;regulation of organelle organization;response to abiotic stimulus;response to osmotic stress;response to stimulus;response to stress	3	35	35	35	74.8	74.8	74.8	67.325	615
P09457	ATPO_YEAST	ATP synthase subunit 5, mitochondrial (ATP synthase chain 5) (Oligomycin sensitivity conferral protein) (OSCP)	ATP5 OSCP YDR298C D9740.11	0.811169	0.919188	-0.861087	-0.869269	cation transmembrane transporter activity;hydrogen ion transmembrane transporter activity;hydrogen ion transporting ATP synthase activity, rotational mechanism;inorganic cation transmembrane transporter activity;ion transmembrane transporter activity;monovalent inorganic cation transmembrane transporter activity;substrate-specific transmembrane transporter activity;substrate-specific transporter …	cell part;cytoplasmic part;intracellular organelle part;intracellular part;macromolecular complex;membrane part;mitochondrial membrane part;mitochondrial part;mitochondrial proton-transporting ATP synthase, stator stalk;organelle part;protein complex;proton-transporting ATP synthase, stator stalk	biosynthetic process;cellular metabolic process;cellular nitrogen compound metabolic process;cellular process;establishment of localization;heterocycle metabolic process;hydrogen transport;ion transport;metabolic process;nitrogen compound metabolic process;nucleobase-containing compound metabolic process;nucleobase-containing small molecule metabolic process;nucleotide metabolic process;primary m…	3	15	15	15	68.4	68.4	68.4	22.814	212
P47154	STE24_YEAST	CAAX prenyl protease 1 (EC 3.4.24.84) (A-factor-converting enzyme) (Prenyl protein-specific endoprotease 1) (PPSEP 1)	STE24 AFC1 YJR117W J2032	0.802326	0.926989	-0.893826	-0.835489	binding;catalytic activity;cation binding;endopeptidase activity;hydrolase activity;ion binding;metal ion binding;metalloendopeptidase activity;metallopeptidase activity;peptidase activity;peptidase activity, acting on L-amino acid peptides	cell part;cytoplasmic part;endoplasmic reticulum part;integral to endoplasmic reticulum membrane;integral to membrane;integral to organelle membrane;intracellular organelle part;intracellular part;intrinsic to endoplasmic reticulum membrane;intrinsic to membrane;intrinsic to organelle membrane;membrane;membrane part;nuclear inner membrane;nuclear membrane;nuclear part;organelle inner membrane;org…	macromolecule metabolic process;metabolic process;primary metabolic process;protein maturation;protein metabolic process;response to chemical stimulus;response to stimulus	3	15	15	15	39.3	39.3	39.3	52.323	453
P0CX26	RL43B_YEAST	60S ribosomal protein L43-B (L37a) (Large ribosomal subunit protein eL43-B) (YL35)	RPL43B YJR094W-A YJR094BW	0.784112	0.943043	-0.909984	-0.81717	binding;cation binding;ion binding;metal ion binding;structural constituent of ribosome;structural molecule activity	cell part;cytosolic large ribosomal subunit;intracellular organelle part;intracellular part;large ribosomal subunit;macromolecular complex;organelle part;ribonucleoprotein complex	biosynthetic process;cellular metabolic process;cellular process;cytoplasmic translation;macromolecule metabolic process;metabolic process;primary metabolic process;protein metabolic process;translation	3	7	7	7	59.8	59.8	59.8	10.091	92
P08566	ARO1_YEAST	Pentafunctional AROM polypeptide [Includes: 3-dehydroquinate synthase (DHQS) (EC 4.2.3.4); 3-phosphoshikimate 1-carboxyvinyltransferase (EC 2.5.1.19) (5-enolpyruvylshikimate-3-phosphate synthase) (EPSP synthase) (EPSPS); Shikimate kinase (SK) (EC 2.7.1.71); 3-dehydroquinate dehydratase (3-dehydroquinase) (EC 4.2.1.10); Shikimate dehydrogenase (EC 1.1.1.25)]	ARO1 AROM YDR127W YD9302.02	0.755849	0.964306	-0.761739	-0.958416	3-dehydroquinate dehydratase activity;3-dehydroquinate synthase activity;3-phosphoshikimate 1-carboxyvinyltransferase activity;adenyl nucleotide binding;adenyl ribonucleotide binding;ATP binding;binding;carbon-oxygen lyase activity;carbon-oxygen lyase activity, acting on phosphates;catalytic activity;cation binding;hydro-lyase activity;ion binding;kinase activity;lyase activity;metal ion binding;…	cell part;cytoplasm;intracellular part	amine metabolic process;biosynthetic process;cellular amino acid metabolic process;cellular aromatic compound metabolic process;cellular ketone metabolic process;cellular metabolic process;cellular nitrogen compound metabolic process;cellular process;metabolic process;nitrogen compound metabolic process;organic acid metabolic process;primary metabolic process;small molecule metabolic process	3	92	92	92	68.5	68.5	68.5	174.75	1588
P53278	YG3A_YEAST	Uncharacterized protein YGR130C	YGR130C	0.704439	0.998048	-0.680314	-1.02217		cell cortex part;cell part;cytoplasmic part;eisosome;intracellular part;macromolecular complex;protein complex		3	39	39	39	50	50	50	92.697	816
Q12466	TCB1_YEAST	Tricalbin-1	TCB1 YOR086C YOR3141c	0.741407	0.974303	-0.736989	-0.978721	binding;calcium-dependent phospholipid binding;cation binding;ion binding;lipid binding;metal ion binding;phospholipid binding	cell cortex part;cell part;cortical endoplasmic reticulum;cytoplasmic part;endoplasmic reticulum part;integral to membrane;intracellular organelle part;intracellular part;intrinsic to membrane;membrane;membrane part;organelle part;plasma membrane	biological regulation;cellular component organization;cellular membrane organization;cellular process;membrane organization	3	40	40	39	40.9	40.9	39.8	133.57	1186
Q06440	CORO_YEAST	Coronin-like protein	CRN1 YLR429W L9576.2	0.622039	1.07647	-0.772405	-0.926105	actin binding;actin filament binding;binding;binding, bridging;cytoskeletal protein binding;microtubule binding;protein binding;protein binding, bridging;tubulin binding	actin cortical patch;cell cortex part;cell part;cytoplasmic part;cytoskeletal part;intracellular organelle part;intracellular part;organelle part	biological regulation;cellular component organization;cellular localization;cellular process;cytoskeleton organization;localization;organelle organization;regulation of organelle organization	3	35	35	35	63.7	63.7	63.7	72.552	651
P00899	TRPE_YEAST	Anthranilate synthase component 1 (EC 4.1.3.27) (Anthranilate synthase component I)	TRP2 YER090W	0.644203	1.05541	-0.734121	-0.965493	anthranilate synthase activity;carbon-carbon lyase activity;catalytic activity;lyase activity;oxo-acid-lyase activity	anthranilate synthase complex;cell part;cytoplasmic part;intracellular part;macromolecular complex;protein complex	amine metabolic process;biosynthetic process;cellular amino acid metabolic process;cellular aromatic compound metabolic process;cellular ketone metabolic process;cellular metabolic process;cellular nitrogen compound metabolic process;cellular process;heterocycle metabolic process;metabolic process;nitrogen compound metabolic process;organic acid metabolic process;primary metabolic process;small m…	3	33	33	33	68.8	68.8	68.8	56.767	507
P38295	MCFS2_YEAST	Medium-chain fatty acid ethyl ester synthase/esterase 2 (Alcohol O-acetyltransferase) (EC 2.3.1.84) (EC 3.1.1.-) (Ethanol hexanoyl transferase 1)	EHT1 YBR177C YBR1239	0.67406	1.0302	-0.725447	-0.978809	acetyltransferase activity;alcohol O-acetyltransferase activity;alcohol O-acyltransferase activity;alcohol O-butanoyltransferase activity;butanoyltransferase activity;carboxylic ester hydrolase activity;catalytic activity;hydrolase activity;hydrolase activity, acting on ester bonds;O-acetyltransferase activity;O-acyltransferase activity;O-butanoyltransferase activity;short-chain carboxylesterase …	cell part;cytoplasmic part;intracellular part;lipid particle	biosynthetic process;catabolic process;cellular ketone metabolic process;cellular lipid metabolic process;cellular metabolic process;cellular process;lipid metabolic process;metabolic process;organic acid metabolic process;primary metabolic process;small molecule metabolic process	3	30	30	30	66.7	66.7	66.7	51.255	451
P36114	YKR18_YEAST	Mitochondrial outer membrane protein YKR018C	YKR018C	0.685504	1.02864	-0.81933	-0.894811		cell part;cytoplasmic part;integral to membrane;intracellular organelle part;intracellular part;intrinsic to membrane;membrane;membrane part;mitochondrial membrane;mitochondrial outer membrane;mitochondrial part;organelle membrane;organelle outer membrane;organelle part;outer membrane		3	32	32	32	45.8	45.8	45.8	81.753	725
P38988	GGC1_YEAST	Mitochondrial GTP/GDP carrier protein 1	GGC1 SHM1 YHM1 YDL198C D1214	0.444234	1.19886	-0.733459	-0.909634	guanine nucleotide transmembrane transporter activity;nucleobase-containing compound transmembrane transporter activity;nucleotide transmembrane transporter activity;purine nucleotide transmembrane transporter activity;substrate-specific transmembrane transporter activity;substrate-specific transporter activity;transmembrane transporter activity;transporter activity	cell part;cytoplasmic part;integral to membrane;intracellular organelle part;intracellular part;intrinsic to membrane;membrane;membrane part;mitochondrial inner membrane;mitochondrial membrane;mitochondrial part;organelle inner membrane;organelle membrane;organelle part	biological regulation;cellular component organization;cellular homeostasis;cellular ion homeostasis;cellular process;establishment of localization;homeostatic process;mitochondrion organization;nucleobase-containing compound transport;organelle organization;transmembrane transport;transport	3	17	17	17	50.3	50.3	50.3	33.215	300
Q02725	VTC3_YEAST	Vacuolar transporter chaperone 3 (Phosphate metabolism protein 2)	VTC3 PHM2 YPL019C	0.423174	1.20395	-0.659202	-0.967924		cell part;cytoplasmic part;endoplasmic reticulum;fungal-type vacuole membrane;integral to membrane;intracellular membrane-bounded organelle;intracellular organelle;intracellular organelle part;intracellular part;intrinsic to membrane;macromolecular complex;membrane;membrane part;membrane-bounded organelle;organelle;organelle membrane;organelle part;protein complex;vacuolar membrane;vacuolar part;…	autophagy;catabolic process;cellular component organization;cellular membrane organization;cellular metabolic process;cellular process;establishment of localization;membrane fusion;membrane invagination;membrane organization;metabolic process;organelle organization;phosphorus metabolic process;transport;vacuolar transport;vacuole organization	3	42	40	40	49.1	48.3	48.3	96.552	835
P40482	SEC24_YEAST	Protein transport protein SEC24 (Abnormal nuclear morphology 1)	SEC24 ANU1 YIL109C	0.510949	1.15664	-0.76072	-0.906871	binding;cation binding;ion binding;metal ion binding;peptide binding;signal sequence binding;transition metal ion binding;zinc ion binding	cell part;COPII vesicle coat;cytoplasmic part;cytoplasmic vesicle part;endoplasmic reticulum membrane;endoplasmic reticulum part;Golgi apparatus part;Golgi membrane;intracellular organelle part;intracellular part;macromolecular complex;membrane;membrane coat;membrane part;organelle membrane;organelle part;protein complex;vesicle coat	cellular component assembly;cellular component organization;cellular macromolecular complex assembly;cellular process;establishment of localization;macromolecular complex assembly;protein complex assembly;protein transport;transport	3	30	30	29	40.9	40.9	39.6	103.63	926
P40046	VTC1_YEAST	Vacuolar transporter chaperone 1 (Negative regulator of CDC42 protein 1) (Phosphate metabolism protein 4)	VTC1 NRF1 PHM4 YER072W	0.500284	1.16556	-0.79017	-0.875677	binding;mRNA binding;nucleic acid binding;RNA binding	cell part;cytoplasmic part;endoplasmic reticulum;integral to membrane;intracellular membrane-bounded organelle;intracellular organelle;intracellular organelle part;intracellular part;intrinsic to membrane;intrinsic to organelle membrane;intrinsic to vacuolar membrane;macromolecular complex;membrane part;membrane-bounded organelle;organelle;organelle part;protein complex;vacuolar part;vacuolar tra…	autophagy;catabolic process;cellular component organization;cellular membrane organization;cellular metabolic process;cellular process;establishment of localization;membrane fusion;membrane invagination;membrane organization;metabolic process;organelle organization;phosphorus metabolic process;transport;vacuolar transport;vacuole organization	3	3	3	3	19.4	19.4	19.4	14.371	129
P41058	RS29B_YEAST	40S ribosomal protein S29-B (S36) (Small ribosomal subunit protein uS14-B) (YS29)	RPS29B RPS36B YS29B YDL061C	0.523378	1.15087	-0.834969	-0.839281	binding;cation binding;ion binding;metal ion binding;structural constituent of ribosome;structural molecule activity	cell part;cytosolic small ribosomal subunit;intracellular organelle part;intracellular part;macromolecular complex;organelle part;ribonucleoprotein complex;small ribosomal subunit	biosynthetic process;cellular metabolic process;cellular process;cytoplasmic translation;macromolecule metabolic process;metabolic process;primary metabolic process;protein metabolic process;translation	3	6	6	5	69.6	69.6	50	6.7276	56
Q08972	NEW1_YEAST	[NU+] prion formation protein 1	NEW1 YPL226W P1445	0.415754	1.21633	-0.905039	-0.727044	adenyl nucleotide binding;adenyl ribonucleotide binding;ATP binding;ATPase activity;binding;catalytic activity;hydrolase activity;hydrolase activity, acting on acid anhydrides;hydrolase activity, acting on acid anhydrides, in phosphorus-containing anhydrides;nucleoside-triphosphatase activity;nucleotide binding;purine nucleotide binding;purine ribonucleoside triphosphate binding;purine ribonucleo…	cell part;cytoplasm;intracellular membrane-bounded organelle;intracellular organelle;intracellular part;macromolecular complex;membrane-bounded organelle;nucleus;organelle;polysome;ribonucleoprotein complex	cellular process;establishment of localization;nuclear transport;nucleobase-containing compound transport;nucleocytoplasmic transport;ribosomal small subunit biogenesis;transport	3	54	54	54	50.8	50.8	50.8	134.33	1196
Q04336	YM54_YEAST	Uncharacterized protein YMR196W	YMR196W YM9646.09	0.422652	1.20448	-0.966585	-0.660542	catalytic activity			3	51	51	51	50.9	50.9	50.9	126.62	1088
Q01217	ARG56_YEAST	Protein ARG5,6, mitochondrial [Cleaved into: N-acetyl-gamma-glutamyl-phosphate reductase (EC 1.2.1.38) (N-acetyl-glutamate semialdehyde dehydrogenase) (NAGSA dehydrogenase); Acetylglutamate kinase (EC 2.7.2.8) (N-acetyl-L-glutamate 5-phosphotransferase) (NAG kinase) (AGK)]	ARG5,6 YER069W	0.400877	1.20235	-1.0345	-0.568731	acetylglutamate kinase activity;adenyl nucleotide binding;adenyl ribonucleotide binding;ATP binding;binding;catalytic activity;coenzyme binding;cofactor binding;kinase activity;N-acetyl-gamma-glutamyl-phosphate reductase activity;NAD binding;nucleotide binding;oxidoreductase activity;oxidoreductase activity, acting on the aldehyde or oxo group of donors;oxidoreductase activity, acting on the alde…	cell part;cytoplasmic part;intracellular organelle lumen;intracellular organelle part;intracellular part;membrane-enclosed lumen;mitochondrial matrix;mitochondrial part;organelle lumen;organelle part	amine metabolic process;biological regulation;biosynthetic process;cellular amino acid metabolic process;cellular ketone metabolic process;cellular metabolic process;cellular nitrogen compound metabolic process;cellular process;metabolic process;nitrogen compound metabolic process;organic acid metabolic process;primary metabolic process;small molecule metabolic process	3	50	50	50	66.2	66.2	66.2	94.868	863
Q04409	EMI2_YEAST	Putative glucokinase-2 (EC 2.7.1.2) (Early meiotic induction protein 2) (Glucose kinase 2) (GLK-2)	EMI2 YDR516C D9719.21	0.423953	1.18826	-1.03924	-0.572967	adenyl nucleotide binding;adenyl ribonucleotide binding;ATP binding;binding;carbohydrate kinase activity;catalytic activity;glucokinase activity;hexokinase activity;kinase activity;nucleotide binding;phosphotransferase activity, alcohol group as acceptor;purine nucleotide binding;purine ribonucleoside triphosphate binding;purine ribonucleotide binding;ribonucleotide binding;transferase activity;t…	cell part;cytoplasm;intracellular part	alcohol metabolic process;anatomical structure formation involved in morphogenesis;carbohydrate metabolic process;catabolic process;cell differentiation;cellular metabolic process;cellular process;developmental process;generation of precursor metabolites and energy;metabolic process;primary metabolic process;small molecule metabolic process;sporulation	3	38	36	36	77.4	73.2	73.2	55.92	500
P39517	DHH1_YEAST	ATP-dependent RNA helicase DHH1 (EC 3.6.4.13) (DExD/H-box helicase 1)	DHH1 YDL160C	0.472474	1.16093	-1.03464	-0.598771	adenyl nucleotide binding;adenyl ribonucleotide binding;ATP binding;ATPase activity;ATPase activity, coupled;ATP-dependent helicase activity;ATP-dependent RNA helicase activity;binding;catalytic activity;chromatin binding;helicase activity;hydrolase activity;hydrolase activity, acting on acid anhydrides;hydrolase activity, acting on acid anhydrides, in phosphorus-containing anhydrides;mRNA bindin…	cell part;cytoplasm;cytoplasmic mRNA processing body;cytoplasmic part;intracellular non-membrane-bounded organelle;intracellular organelle;intracellular part;macromolecular complex;non-membrane-bounded organelle;organelle;ribonucleoprotein complex;RNA granule;stress granule	biological regulation;catabolic process;cellular component assembly;cellular component organization;cellular macromolecular complex assembly;cellular metabolic process;cellular nitrogen compound metabolic process;cellular process;establishment of localization;macromolecular complex assembly;macromolecule metabolic process;metabolic process;mRNA metabolic process;mRNA processing;nitrogen compound …	3	21	21	21	46.6	46.6	46.6	57.543	506
P32796	CACP_YEAST	Carnitine O-acetyltransferase, mitochondrial (Carnitine acetylase) (EC 2.3.1.7)	CAT2 CAT YCAT YML042W YM8054.01	0.381994	1.23486	-0.913495	-0.703363	acetyltransferase activity;carnitine O-acetyltransferase activity;carnitine O-acyltransferase activity;catalytic activity;O-acetyltransferase activity;O-acyltransferase activity;transferase activity;transferase activity, transferring acyl groups;transferase activity, transferring acyl groups other than amino-acyl groups	cell part;cytoplasmic part;intracellular membrane-bounded organelle;intracellular organelle;intracellular organelle part;intracellular part;membrane;membrane-bounded organelle;microbody;mitochondrial inner membrane;mitochondrial membrane;mitochondrial part;mitochondrion;organelle;organelle inner membrane;organelle membrane;organelle part;peroxisome	amine metabolic process;cellular amino acid metabolic process;cellular ketone metabolic process;cellular lipid metabolic process;cellular metabolic process;cellular nitrogen compound metabolic process;cellular process;establishment of localization;lipid metabolic process;metabolic process;nitrogen compound metabolic process;organic acid metabolic process;primary metabolic process;small molecule m…	3	22	22	22	42.4	42.4	42.4	77.241	670
P53622	COPA_YEAST	Coatomer subunit alpha (Alpha-coat protein) (Alpha-COP) (Retrieval from endoplasmic reticulum protein 1) (Secretory protein 22) (Suppressor of osmo-sensitivity 1)	COP1 RET1 SEC33 SOO1 YDL145C D1578	0.541035	1.13458	-0.927695	-0.747922	binding;protein binding;small conjugating protein binding;structural molecule activity;ubiquitin binding	cell part;COPI vesicle coat;cytoplasmic part;cytoplasmic vesicle part;Golgi apparatus part;intracellular organelle part;intracellular part;macromolecular complex;membrane coat;membrane part;organelle part;protein complex;vesicle coat	cellular process;establishment of localization;Golgi vesicle transport;protein transport;transport;vesicle-mediated transport	3	59	59	59	60	60	60	135.61	1201
P22137	CLH_YEAST	Clathrin heavy chain	CHC1 YGL206C	0.612395	1.08501	-0.908452	-0.788952	structural molecule activity	cell part;clathrin coat;clathrin coat of coated pit;clathrin coat of trans-Golgi network vesicle;clathrin vesicle coat;cytoplasmic part;cytoplasmic vesicle part;Golgi apparatus part;intracellular organelle part;intracellular part;macromolecular complex;membrane coat;membrane part;organelle part;plasma membrane part;protein complex;vesicle coat	cellular component organization;cellular membrane organization;cellular process;endocytosis;establishment of localization;membrane invagination;membrane organization;protein transport;transport;vesicle-mediated transport	3	91	91	91	63.2	63.2	63.2	187.23	1653
P40215	NDH1_YEAST	External NADH-ubiquinone oxidoreductase 1, mitochondrial (EC 1.6.5.9) (External NADH dehydrogenase 1)	NDE1 NDH1 YMR145C YM9375.14C	1.00797	0.183927	0.191413	-1.38331	binding;catalytic activity;coenzyme binding;cofactor binding;flavin adenine dinucleotide binding;NADH dehydrogenase activity;oxidoreductase activity;oxidoreductase activity, acting on NADH or NADPH	cell part;cytoplasmic part;intracellular membrane-bounded organelle;intracellular organelle;intracellular organelle part;intracellular part;membrane-bounded organelle;membrane-enclosed lumen;mitochondrial intermembrane space;mitochondrial part;mitochondrion;organelle;organelle envelope lumen;organelle part	aging;alcohol metabolic process;carbohydrate metabolic process;catabolic process;cellular metabolic process;cellular nitrogen compound metabolic process;cellular process;cofactor metabolic process;developmental process;fermentation;generation of precursor metabolites and energy;heterocycle metabolic process;metabolic process;nitrogen compound metabolic process;nucleobase-containing compound metab…	4	39	39	38	65.4	65.4	65.4	62.773	560
P47771	ALDH2_YEAST	Aldehyde dehydrogenase [NAD(P)+] 1 (EC 1.2.1.3)	ALD2 ALD5 YMR170C YM8520.19C	0.906215	0.301225	0.220624	-1.42806	aldehyde dehydrogenase (NAD) activity;catalytic activity;oxidoreductase activity;oxidoreductase activity, acting on the aldehyde or oxo group of donors;oxidoreductase activity, acting on the aldehyde or oxo group of donors, NAD or NADP as acceptor	cell part;cytoplasm;intracellular part	amine metabolic process;biosynthetic process;catabolic process;cellular aldehyde metabolic process;cellular amino acid metabolic process;cellular ketone metabolic process;cellular metabolic process;cellular nitrogen compound metabolic process;cellular process;cofactor metabolic process;metabolic process;nitrogen compound metabolic process;organic acid metabolic process;primary metabolic process;s…	4	35	12	12	73.9	38.5	38.5	55.187	506
P41835	THI6_YEAST	Thiamine biosynthetic bifunctional enzyme [Includes: Thiamine-phosphate synthase (TP synthase) (TPS) (EC 2.5.1.3) (Thiamine-phosphate pyrophosphorylase) (TMP pyrophosphorylase) (TMP-PPase); Hydroxyethylthiazole kinase (EC 2.7.1.50) (4-methyl-5-beta-hydroxyethylthiazole kinase) (TH kinase) (THZ kinase)]	THI6 YPL214C	0.983408	0.337817	0.062565	-1.38379	adenyl nucleotide binding;adenyl ribonucleotide binding;ATP binding;binding;catalytic activity;cation binding;hydroxyethylthiazole kinase activity;ion binding;kinase activity;metal ion binding;nucleotide binding;phosphotransferase activity, alcohol group as acceptor;purine nucleotide binding;purine ribonucleoside triphosphate binding;purine ribonucleotide binding;ribonucleotide binding;thiamine-p…	cell part;cytoplasmic part;cytosol;intracellular part	biosynthetic process;cellular aromatic compound metabolic process;cellular metabolic process;cellular nitrogen compound metabolic process;cellular process;cofactor metabolic process;heterocycle metabolic process;metabolic process;nitrogen compound metabolic process;small molecule metabolic process;sulfur compound metabolic process;vitamin metabolic process	4	23	23	23	53	53	53	58.058	540
P53630	BIOD_YEAST	Dethiobiotin synthetase (DTB synthetase) (EC 6.3.3.3) (Dethiobiotin synthase) (DTBS)	BIO4 YNR057C N3506	1.0806	0.243559	0.0073533	-1.33151	adenyl nucleotide binding;adenyl ribonucleotide binding;ATP binding;binding;catalytic activity;cation binding;cyclo-ligase activity;dethiobiotin synthase activity;ion binding;ligase activity;ligase activity, forming carbon-nitrogen bonds;magnesium ion binding;metal ion binding;nucleotide binding;purine nucleotide binding;purine ribonucleoside triphosphate binding;purine ribonucleotide binding;rib…	cell part;cytoplasm;intracellular part	biosynthetic process;cellular amide metabolic process;cellular ketone metabolic process;cellular metabolic process;cellular nitrogen compound metabolic process;cellular process;cofactor metabolic process;heterocycle metabolic process;metabolic process;nitrogen compound metabolic process;organic acid metabolic process;small molecule metabolic process;sulfur compound metabolic process;vitamin metab…	4	14	14	14	97.5	97.5	97.5	26.257	237
P40364	MPM1_YEAST	Mitochondrial peculiar membrane protein 1	MPM1 YJL066C HRE252 J1111	1.04865	0.0540175	0.25162	-1.35429		cell part;cytoplasmic part;extrinsic to membrane;intracellular membrane-bounded organelle;intracellular organelle;intracellular organelle part;intracellular part;membrane;membrane part;membrane-bounded organelle;membrane-enclosed lumen;mitochondrial intermembrane space;mitochondrial membrane;mitochondrial part;mitochondrion;organelle;organelle envelope lumen;organelle membrane;organelle part		4	15	15	15	69.8	69.8	69.8	28.47	252
P17709	HXKG_YEAST	Glucokinase-1 (EC 2.7.1.2) (Glucose kinase 1) (GLK-1)	GLK1 HOR3 YCL040W YCL312 YCL40W	1.19585	0.128254	-0.080308	-1.2438	adenyl nucleotide binding;adenyl ribonucleotide binding;ATP binding;binding;carbohydrate kinase activity;catalytic activity;glucokinase activity;hexokinase activity;kinase activity;nucleotide binding;phosphotransferase activity, alcohol group as acceptor;purine nucleotide binding;purine ribonucleoside triphosphate binding;purine ribonucleotide binding;ribonucleotide binding;transferase activity;t…		alcohol metabolic process;carbohydrate metabolic process;carbohydrate transport;catabolic process;cellular metabolic process;cellular process;establishment of localization;generation of precursor metabolites and energy;metabolic process;primary metabolic process;small molecule metabolic process;transport	4	42	42	40	81.2	81.2	77	55.377	500
P11633	NHP6B_YEAST	Non-histone chromosomal protein 6B	NHP6B NHPB YBR089C-A YBR090BC	1.29609	0.0363447	-0.201914	-1.13052	binding;chromatin binding;DNA bending activity;DNA binding;nucleic acid binding;nucleosome binding	cell part;chromosome;intracellular membrane-bounded organelle;intracellular non-membrane-bounded organelle;intracellular organelle;intracellular part;membrane-bounded organelle;non-membrane-bounded organelle;nucleus;organelle	biological regulation;biosynthetic process;cellular component assembly;cellular component organization;cellular macromolecular complex assembly;cellular metabolic process;cellular nitrogen compound metabolic process;cellular process;chromatin modification;chromatin organization;chromosome organization;DNA metabolic process;DNA repair;macromolecular complex assembly;macromolecule metabolic process…	4	5	5	5	39.4	39.4	39.4	11.476	99
P32602	SEC17_YEAST	Alpha-soluble NSF attachment protein (SNAP-alpha) (N-ethylmaleimide-sensitive factor attachment protein alpha) (Vesicular-fusion protein SEC17) (alpha-SNAP chaperone)	SEC17 YBL050W YBL0505 YBL0517	1.13215	0.27071	-0.126571	-1.27629	ATPase activator activity;ATPase regulator activity;binding;enzyme activator activity;enzyme regulator activity;nucleoside-triphosphatase regulator activity;protein binding;soluble NSF attachment protein activity	cell part;cytoplasmic part;cytosol;extrinsic to membrane;intracellular part;macromolecular complex;membrane part;protein complex;SNARE complex	autophagy;biological regulation;catabolic process;cellular component disassembly;cellular component organization;cellular membrane organization;cellular metabolic process;cellular process;establishment of localization;membrane fusion;membrane organization;metabolic process;organelle fusion;organelle organization;protein transport;transport;vacuole organization;vesicle organization	4	18	18	18	68.2	68.2	68.2	32.802	292
P04912	H2A2_YEAST	Histone H2A.2	HTA2 H2A2 YBL003C YBL0103	1.23842	0.290679	-0.438393	-1.09071	binding;DNA binding;nucleic acid binding	cell part;chromosomal part;intracellular organelle part;intracellular part;macromolecular complex;nuclear chromosome part;nuclear nucleosome;nuclear part;nucleosome;organelle part;protein complex;protein-DNA complex;replication fork protection complex	cellular component organization;cellular metabolic process;cellular nitrogen compound metabolic process;cellular process;chromatin organization;chromosome organization;DNA metabolic process;DNA repair;macromolecule metabolic process;metabolic process;nitrogen compound metabolic process;nucleobase-containing compound metabolic process;organelle organization;primary metabolic process;response to DN…	4	5	5	4	40.2	40.2	40.2	13.989	132
P15303	SEC23_YEAST	Protein transport protein SEC23	SEC23 YPR181C P9705.14	1.22394	0.253568	-0.322736	-1.15478	binding;cation binding;enzyme activator activity;enzyme regulator activity;GTPase activator activity;GTPase regulator activity;ion binding;metal ion binding;nucleoside-triphosphatase regulator activity;transition metal ion binding;zinc ion binding	cell part;COPII vesicle coat;cytoplasmic part;cytoplasmic vesicle part;endoplasmic reticulum membrane;endoplasmic reticulum part;Golgi apparatus part;Golgi membrane;intracellular organelle part;intracellular part;macromolecular complex;membrane;membrane coat;membrane part;organelle membrane;organelle part;protein complex;vesicle coat	biological regulation;catabolic process;cellular metabolic process;cellular nitrogen compound metabolic process;cellular process;establishment of localization;Golgi vesicle transport;heterocycle metabolic process;metabolic process;nitrogen compound metabolic process;nucleobase-containing compound catabolic process;nucleobase-containing compound metabolic process;nucleobase-containing small molecu…	4	37	37	37	63	63	63	85.384	768
Q01939	PRS8_YEAST	26S protease regulatory subunit 8 homolog (Protein CIM3) (Protein SUG1) (Tat-binding protein TBY1)	RPT6 CIM3 CRL3 SUG1 TBPY TBY1 YGL048C	1.15313	0.344469	-0.284998	-1.2126	adenyl nucleotide binding;adenyl ribonucleotide binding;ATP binding;ATPase activity;binding;catalytic activity;hydrolase activity;hydrolase activity, acting on acid anhydrides;hydrolase activity, acting on acid anhydrides, in phosphorus-containing anhydrides;nucleoside-triphosphatase activity;nucleotide binding;protein binding;protein domain specific binding;purine nucleotide binding;purine ribon…	cell part;cytoplasmic part;cytosolic part;cytosolic proteasome complex;intracellular membrane-bounded organelle;intracellular organelle;intracellular part;macromolecular complex;membrane-bounded organelle;nucleus;organelle;proteasome complex;proteasome regulatory particle, base subcomplex;proteasome storage granule;protein complex	biological regulation;catabolic process;cellular component assembly;cellular component organization;cellular macromolecular complex assembly;cellular metabolic process;cellular nitrogen compound metabolic process;cellular process;chromatin modification;chromatin organization;chromosome organization;DNA metabolic process;DNA repair;macromolecular complex assembly;macromolecule metabolic process;me…	4	21	21	21	58.8	58.8	58.8	45.271	405
P25343	RV161_YEAST	Reduced viability upon starvation protein 161	RVS161 END6 SPE161 YCR009C YCR9C	1.20236	0.354384	-0.448968	-1.10778	binding;cytoskeletal protein binding;protein binding	actin cortical patch;cell cortex part;cell part;cell projection;cytoplasmic part;cytoskeletal part;intracellular organelle part;intracellular part;mating projection;membrane part;membrane raft;organelle part	cellular component assembly;cellular component organization;cellular localization;cellular macromolecular complex assembly;cellular membrane organization;cellular process;conjugation;conjugation with cellular fusion;cytoskeleton organization;endocytosis;establishment of localization;localization;macromolecular complex assembly;membrane invagination;membrane organization;multi-organism process;org…	4	20	20	20	77.7	77.7	77.7	30.25	265
P49435	APT1_YEAST	Adenine phosphoribosyltransferase 1 (APRT 1) (EC 2.4.2.7)	APT1 YML022W	1.24753	0.291786	-0.474884	-1.06443	adenine phosphoribosyltransferase activity;binding;catalytic activity;cation binding;ion binding;metal ion binding;transferase activity;transferase activity, transferring glycosyl groups;transferase activity, transferring pentosyl groups	cell part;cytoplasm;intracellular membrane-bounded organelle;intracellular organelle;intracellular part;membrane-bounded organelle;nucleus;organelle	biosynthetic process;cellular aromatic compound metabolic process;cellular metabolic compound salvage;cellular metabolic process;cellular nitrogen compound metabolic process;cellular process;heterocycle metabolic process;metabolic process;nitrogen compound metabolic process;nucleobase-containing compound metabolic process;nucleobase-containing small molecule metabolic process;nucleotide metabolic…	4	8	8	8	39.6	39.6	39.6	20.587	187
P40414	TPM2_YEAST	Tropomyosin-2	TPM2 YIL138C	1.2992	0.22676	-0.54347	-0.982493	actin binding;actin filament binding;actin lateral binding;binding;cytoskeletal protein binding;protein binding	actin filament bundle;actomyosin contractile ring;cell cortex part;cell division site part;cell part;cellular bud neck contractile ring;contractile ring;cytoplasmic part;cytoskeletal part;intracellular organelle part;intracellular part;organelle part	cellular component assembly;cellular component organization;cellular localization;cellular process;cytoskeleton organization;establishment of localization;establishment or maintenance of cell polarity;exocytosis;growth;localization;mitochondrion organization;organelle inheritance;organelle localization;organelle organization;secretion;transport;vacuole organization;vesicle-mediated transport	4	19	19	19	75.8	75.8	75.8	19.093	161
P32485	HOG1_YEAST	Mitogen-activated protein kinase HOG1 (MAP kinase HOG1) (EC 2.7.11.24) (High osmolarity glycerol response protein 1)	HOG1 SSK3 YLR113W L2931 L9354.2	1.27491	-0.0795474	-0.0259085	-1.16945	adenyl nucleotide binding;adenyl ribonucleotide binding;ATP binding;binding;catalytic activity;chromatin binding;kinase activity;MAP kinase activity;molecular transducer activity;nucleotide binding;phosphotransferase activity, alcohol group as acceptor;protein kinase activity;protein serine/threonine kinase activity;purine nucleotide binding;purine ribonucleoside triphosphate binding;purine ribon…	cell part;cytoplasm;intracellular membrane-bounded organelle;intracellular organelle;intracellular part;membrane-bounded organelle;nucleus;organelle	biological regulation;biosynthetic process;cellular metabolic process;cellular nitrogen compound metabolic process;cellular process;macromolecule metabolic process;macromolecule modification;metabolic process;nitrogen compound metabolic process;nucleobase-containing compound metabolic process;phosphorus metabolic process;primary metabolic process;protein metabolic process;protein modification pro…	4	16	16	15	48	48	46.2	48.858	435
P38115	ARA1_YEAST	D-arabinose dehydrogenase [NAD(P)+] heavy chain (EC 1.1.1.117) (AKR3C)	ARA1 YBR149W YBR1127	1.33187	-0.433553	0.114173	-1.01249	catalytic activity;D-arabinose 1-dehydrogenase [NAD(P)+] activity;oxidoreductase activity;oxidoreductase activity, acting on CH-OH group of donors;oxidoreductase activity, acting on the CH-OH group of donors, NAD or NADP as acceptor	cell part;cytoplasmic part;cytosol;intracellular part	carbohydrate metabolic process;cellular metabolic process;cellular process;metabolic process;primary metabolic process	4	29	29	29	73.3	73.3	73.3	38.883	344
P33775	PMT1_YEAST	Dolichyl-phosphate-mannose--protein mannosyltransferase 1 (EC 2.4.1.109)	PMT1 YDL095W D2390	1.23433	-0.121651	0.0927358	-1.20542	catalytic activity;dolichyl-phosphate-mannose-protein mannosyltransferase activity;mannosyltransferase activity;transferase activity;transferase activity, transferring glycosyl groups;transferase activity, transferring hexosyl groups	cell part;integral to membrane;intrinsic to membrane;membrane part	carbohydrate metabolic process;catabolic process;cellular metabolic process;cellular process;establishment of localization;macromolecule metabolic process;macromolecule modification;metabolic process;primary metabolic process;protein glycosylation;protein metabolic process;protein modification process;protein transport;proteolysis;proteolysis involved in cellular protein catabolic process;respons…	4	23	23	23	32.8	32.8	32.8	92.674	817
P15646	FBRL_YEAST	rRNA 2'-O-methyltransferase fibrillarin (EC 2.1.1.-) (Histone-glutamine methyltransferase) (U3 small nucleolar RNA-associated protein NOP1) (Nucleolar protein 1) (U3 snoRNA-associated protein NOP1)	NOP1 LOT3 YDL014W D2870	1.20678	-0.144781	0.161391	-1.22339	binding;catalytic activity;methyltransferase activity;nucleic acid binding;RNA binding;RNA methyltransferase activity;rRNA methyltransferase activity;S-adenosylmethionine-dependent methyltransferase activity;transferase activity;transferase activity, transferring one-carbon groups	box C/D snoRNP complex;cell part;intracellular non-membrane-bounded organelle;intracellular organelle;intracellular organelle part;intracellular part;macromolecular complex;non-membrane-bounded organelle;nuclear part;nucleolar part;nucleolus;organelle;organelle part;preribosome;ribonucleoprotein complex;small nucleolar ribonucleoprotein complex;small-subunit processome	biological regulation;cellular metabolic process;cellular nitrogen compound metabolic process;cellular process;macromolecule metabolic process;macromolecule modification;metabolic process;nitrogen compound metabolic process;nucleobase-containing compound metabolic process;one-carbon metabolic process;primary metabolic process;RNA metabolic process;RNA modification;RNA processing;rRNA processing;s…	4	19	19	19	53.5	53.5	53.5	34.465	327
Q01852	TIM44_YEAST	Mitochondrial import inner membrane translocase subunit TIM44 (Inner membrane import site protein 45) (ISP45) (Membrane import machinery protein MIM44) (Mitochondrial protein import protein 1)	TIM44 ISP45 MIM44 MPI1 YIL022W	1.29115	-0.173582	0.023589	-1.14116	active transmembrane transporter activity;adenyl nucleotide binding;adenyl ribonucleotide binding;ATP binding;binding;binding, bridging;chaperone binding;macromolecule transmembrane transporter activity;nucleotide binding;P-P-bond-hydrolysis-driven protein transmembrane transporter activity;P-P-bond-hydrolysis-driven transmembrane transporter activity;primary active transmembrane transporter acti…	cell part;cytoplasmic part;intracellular organelle part;intracellular part;macromolecular complex;membrane;membrane part;mitochondrial inner membrane;mitochondrial membrane;mitochondrial membrane part;mitochondrial part;organelle inner membrane;organelle membrane;organelle part;presequence translocase-associated import motor;protein complex	cellular process;establishment of localization;protein targeting;protein transport;transmembrane transport;transport	4	20	20	20	53.6	53.6	53.6	48.854	431
P40217	EIF3I_YEAST	Eukaryotic translation initiation factor 3 subunit I (eIF3i) (Eukaryotic translation initiation factor 3 39 kDa subunit) (eIF-3 39 kDa subunit) (eIF3 p39)	TIF34 YMR146C YM9375.16C	1.20448	-0.435296	0.344764	-1.11395	binding;nucleic acid binding;RNA binding;translation factor activity, nucleic acid binding;translation initiation factor activity	cell part;cytoplasmic part;eukaryotic 43S preinitiation complex;eukaryotic 48S preinitiation complex;eukaryotic translation initiation factor 3 complex;intracellular part;macromolecular complex;multi-eIF complex;protein complex;ribonucleoprotein complex;translation preinitiation complex	biological regulation;cellular component assembly;cellular component organization;cellular macromolecular complex assembly;cellular process;macromolecular complex assembly;regulation of translation;ribonucleoprotein complex assembly;translational initiation	4	20	20	20	69.7	69.7	69.7	38.755	347
P20449	DBP5_YEAST	ATP-dependent RNA helicase DBP5 (EC 3.6.4.13) (DEAD box protein 5) (Helicase CA5/6) (Ribonucleic acid-trafficking protein 8)	DBP5 RAT8 YOR046C	1.10732	-0.584248	0.543347	-1.06642	adenyl nucleotide binding;adenyl ribonucleotide binding;ATP binding;ATPase activity;ATPase activity, coupled;binding;catalytic activity;helicase activity;hydrolase activity;hydrolase activity, acting on acid anhydrides;hydrolase activity, acting on acid anhydrides, in phosphorus-containing anhydrides;nucleic acid binding;nucleoside-triphosphatase activity;nucleotide binding;purine nucleotide bind…	cell part;cellular bud tip;cytoplasm;intracellular membrane-bounded organelle;intracellular organelle;intracellular organelle part;intracellular part;macromolecular complex;membrane;membrane part;membrane-bounded organelle;nuclear membrane;nuclear part;nuclear pore;nucleus;organelle;organelle membrane;organelle part;polysome;pore complex;protein complex;ribonucleoprotein complex;site of polarized…	cellular component disassembly;cellular component organization;cellular process;establishment of localization;nuclear transport;nucleobase-containing compound transport;nucleocytoplasmic transport;protein transport;transport	4	27	27	27	59.5	59.5	59.5	53.873	482
P39077	TCPG_YEAST	T-complex protein 1 subunit gamma (TCP-1-gamma) (CCT-gamma)	CCT3 BIN2 TCP3 YJL014W J1336	0.0429594	0.571511	0.806933	-1.4214	adenyl nucleotide binding;adenyl ribonucleotide binding;ATP binding;binding;nucleotide binding;protein binding;purine nucleotide binding;purine ribonucleoside triphosphate binding;purine ribonucleotide binding;ribonucleotide binding;unfolded protein binding	cell part;chaperonin-containing T-complex;cytoplasmic part;cytosolic part;intracellular part;macromolecular complex;protein complex	cellular metabolic process;cellular process;macromolecule metabolic process;metabolic process;primary metabolic process;protein folding;protein metabolic process	4	38	38	38	75.7	75.7	75.7	58.814	534
P38777	FSH1_YEAST	Family of serine hydrolases 1 (EC 3.1.-.-)	FSH1 YHR049W	0.0462753	0.66938	0.713085	-1.42874	carboxylic ester hydrolase activity;catalytic activity;hydrolase activity;hydrolase activity, acting on ester bonds	cell part;cytoplasm;intracellular membrane-bounded organelle;intracellular organelle;intracellular part;membrane-bounded organelle;nucleus;organelle	metabolic process	4	17	17	17	74.1	74.1	74.1	27.339	243
P07213	TOM70_YEAST	Mitochondrial import receptor subunit TOM70 (70 kDa mitochondrial outer membrane protein) (Translocase of outer membrane 70 kDa subunit)	TOM70 MAS70 OMP1 YNL121C N1905	-0.0148253	0.642572	0.779253	-1.407	active transmembrane transporter activity;binding;macromolecule transmembrane transporter activity;mitochondrion targeting sequence binding;peptide binding;P-P-bond-hydrolysis-driven protein transmembrane transporter activity;P-P-bond-hydrolysis-driven transmembrane transporter activity;primary active transmembrane transporter activity;protein transmembrane transporter activity;protein transporte…	cell part;cytoplasmic part;integral to membrane;integral to mitochondrial membrane;integral to mitochondrial outer membrane;integral to organelle membrane;intracellular membrane-bounded organelle;intracellular organelle;intracellular organelle part;intracellular part;intrinsic to membrane;intrinsic to mitochondrial outer membrane;intrinsic to organelle membrane;macromolecular complex;membrane;mem…	cellular component organization;cellular membrane organization;cellular process;establishment of localization;membrane organization;mitochondrion organization;organelle organization;protein targeting;protein transport;transmembrane transport;transport	4	34	34	34	54.1	54.1	54.1	70.122	617
P38972	PUR4_YEAST	Phosphoribosylformylglycinamidine synthase (FGAM synthase) (FGAMS) (EC 6.3.5.3) (Formylglycinamide ribonucleotide amidotransferase) (FGAR amidotransferase) (FGAR-AT) (Formylglycinamide ribotide amidotransferase)	ADE6 YGR061C	-0.0646266	0.409259	1.00432	-1.34895	adenyl nucleotide binding;adenyl ribonucleotide binding;ATP binding;binding;carbon-nitrogen ligase activity, with glutamine as amido-N-donor;catalytic activity;cation binding;ion binding;ligase activity;ligase activity, forming carbon-nitrogen bonds;metal ion binding;nucleotide binding;phosphoribosylformylglycinamidine synthase activity;purine nucleotide binding;purine ribonucleoside triphosphate…	cell part;cytoplasm;intracellular part	amine metabolic process;biosynthetic process;cellular amino acid metabolic process;cellular ketone metabolic process;cellular metabolic process;cellular nitrogen compound metabolic process;cellular process;heterocycle metabolic process;metabolic process;nitrogen compound metabolic process;nucleobase-containing compound metabolic process;nucleobase-containing small molecule metabolic process;nucle…	4	61	61	61	58.8	58.8	58.8	148.9	1358
P21576	VPS1_YEAST	Vacuolar protein sorting-associated protein 1	VPS1 LAM1 SPO15 YKR001C	0.0249963	0.556363	0.832006	-1.41336	binding;catalytic activity;GTP binding;GTPase activity;guanyl nucleotide binding;guanyl ribonucleotide binding;hydrolase activity;hydrolase activity, acting on acid anhydrides;hydrolase activity, acting on acid anhydrides, in phosphorus-containing anhydrides;nucleoside-triphosphatase activity;nucleotide binding;purine nucleotide binding;purine ribonucleoside triphosphate binding;purine ribonucleo…	actin cortical patch;cell cortex part;cell part;cytoplasmic part;cytoskeletal part;endosome;fungal-type vacuole membrane;intracellular membrane-bounded organelle;intracellular organelle;intracellular organelle part;intracellular part;late endosome;macromolecular complex;membrane;membrane-bounded organelle;microbody;microtubule;organelle;organelle membrane;organelle part;peroxisome;protein complex…	biological regulation;cell cycle;cell division;cellular component assembly;cellular component organization;cellular macromolecular complex assembly;cellular membrane organization;cellular process;cytoskeleton organization;endocytosis;establishment of localization;macromolecular complex assembly;meiotic cell cycle;membrane invagination;membrane organization;metabolic process;organelle fission;orga…	4	45	45	45	68.2	68.2	68.2	78.736	704
P33330	SERC_YEAST	Phosphoserine aminotransferase (PSAT) (EC 2.6.1.52) (Phosphohydroxythreonine aminotransferase)	SER1 SERC YOR184W	0.0301299	0.522578	0.857944	-1.41065	binding;catalytic activity;cofactor binding;O-phospho-L-serine:2-oxoglutarate aminotransferase activity;pyridoxal phosphate binding;transaminase activity;transferase activity;transferase activity, transferring nitrogenous groups;vitamin B6 binding;vitamin binding		amine metabolic process;biosynthetic process;cellular amino acid metabolic process;cellular aromatic compound metabolic process;cellular ketone metabolic process;cellular metabolic process;cellular nitrogen compound metabolic process;cellular process;heterocycle metabolic process;metabolic process;nitrogen compound metabolic process;nucleobase-containing compound metabolic process;nucleobase-cont…	4	20	20	20	60.3	60.3	60.3	43.415	395
P39954	SAHH_YEAST	Adenosylhomocysteinase (AdoHcyase) (EC 3.3.1.1) (S-adenosyl-L-homocysteine hydrolase)	SAH1 YER043C	0.0332819	0.489976	0.883342	-1.4066	adenosylhomocysteinase activity;catalytic activity;hydrolase activity;hydrolase activity, acting on ether bonds;trialkylsulfonium hydrolase activity		alcohol metabolic process;amine metabolic process;biosynthetic process;catabolic process;cellular amino acid metabolic process;cellular ketone metabolic process;cellular lipid metabolic process;cellular metabolic process;cellular nitrogen compound metabolic process;cellular process;glycerol ether metabolic process;lipid metabolic process;metabolic process;nitrogen compound metabolic process;one-c…	4	38	38	38	75.1	75.1	75.1	49.125	449
P12695	ODP2_YEAST	Dihydrolipoyllysine-residue acetyltransferase component of pyruvate dehydrogenase complex, mitochondrial (EC 2.3.1.12) (Dihydrolipoamide acetyltransferase component of pyruvate dehydrogenase complex) (Pyruvate dehydrogenase complex component E2) (PDC-E2) (PDCE2)	LAT1 ODP2 PDA2 YNL071W N2374	-0.14395	0.69356	0.808527	-1.35814	acetyltransferase activity;catalytic activity;dihydrolipoamide S-acyltransferase activity;dihydrolipoyllysine-residue acetyltransferase activity;S-acetyltransferase activity;S-acyltransferase activity;transferase activity;transferase activity, transferring acyl groups;transferase activity, transferring acyl groups other than amino-acyl groups	cell part;cytoplasmic part;intracellular organelle part;intracellular part;macromolecular complex;mitochondrial part;mitochondrial pyruvate dehydrogenase complex;organelle part;protein complex;pyruvate dehydrogenase complex	biosynthetic process;cellular ketone metabolic process;cellular metabolic process;cellular process;cofactor metabolic process;metabolic process;organic acid metabolic process;small molecule metabolic process	4	29	29	29	69.1	69.1	69.1	51.817	482
Q08224	THI20_YEAST	Hydroxymethylpyrimidine/phosphomethylpyrimidine kinase THI20 (EC 2.7.1.49) (EC 2.7.4.7) (Hydroxymethylpyrimidine kinase) (HMP kinase) (Hydroxymethylpyrimidine phosphate kinase) (HMP-P kinase) (HMP-phosphate kinase) (HMPP kinase)	THI20 YOL055C O1239	-0.290501	0.72199	0.856927	-1.28842	adenyl nucleotide binding;adenyl ribonucleotide binding;ATP binding;binding;catalytic activity;hydrolase activity;hydrolase activity, acting on carbon-nitrogen (but not peptide) bonds;hydroxymethylpyrimidine kinase activity;kinase activity;nucleotide binding;phosphomethylpyrimidine kinase activity;phosphotransferase activity, alcohol group as acceptor;phosphotransferase activity, phosphate group …	cell part;cytoplasmic part;cytosol;intracellular part	biosynthetic process;catabolic process;cellular aromatic compound metabolic process;cellular metabolic process;cellular nitrogen compound metabolic process;cellular process;cofactor metabolic process;heterocycle metabolic process;metabolic process;nitrogen compound metabolic process;small molecule metabolic process;sulfur compound metabolic process;vitamin metabolic process	4	35	35	28	63.3	63.3	54.3	61.269	551
P33401	PGM1_YEAST	Phosphoglucomutase 1 (PGM 1) (EC 5.4.2.2) (Glucose phosphomutase 1)	PGM1 YKL127W	0.308941	0.430767	0.735905	-1.47561	binding;catalytic activity;cation binding;intramolecular transferase activity;intramolecular transferase activity, phosphotransferases;ion binding;isomerase activity;magnesium ion binding;metal ion binding;phosphoglucomutase activity	cell part;cytoplasm;intracellular part	alcohol metabolic process;biosynthetic process;carbohydrate metabolic process;catabolic process;cellular metabolic process;cellular nitrogen compound metabolic process;cellular process;energy reserve metabolic process;generation of precursor metabolites and energy;macromolecule metabolic process;metabolic process;nitrogen compound metabolic process;nucleobase-containing compound metabolic process…	4	24	19	19	52.1	45.3	45.3	63.111	570
Q12305	RDL1_YEAST	Thiosulfate sulfurtransferase RDL1, mitochondrial (EC 2.8.1.1) (Rhodanese-like protein 1)	RDL1 YOR285W	0.31808	0.292472	0.840782	-1.45133	catalytic activity;sulfurtransferase activity;thiosulfate sulfurtransferase activity;transferase activity;transferase activity, transferring sulfur-containing groups	cell part;cytoplasmic part;intracellular membrane-bounded organelle;intracellular organelle;intracellular part;membrane-bounded organelle;mitochondrion;organelle	metabolic process	4	11	11	11	89.9	89.9	89.9	15.413	139
P15454	KGUA_YEAST	Guanylate kinase (EC 2.7.4.8) (GMP kinase)	GUK1 YDR454C D9461.39	0.341222	0.374441	0.757353	-1.47302	adenyl nucleotide binding;adenyl ribonucleotide binding;ATP binding;binding;catalytic activity;guanylate kinase activity;kinase activity;nucleobase-containing compound kinase activity;nucleotide binding;nucleotide kinase activity;phosphotransferase activity, phosphate group as acceptor;purine nucleotide binding;purine ribonucleoside triphosphate binding;purine ribonucleotide binding;ribonucleotid…		cellular metabolic process;cellular nitrogen compound metabolic process;cellular process;heterocycle metabolic process;metabolic process;nitrogen compound metabolic process;nucleobase-containing compound metabolic process;nucleobase-containing small molecule metabolic process;nucleotide metabolic process;phosphorus metabolic process;primary metabolic process;small molecule metabolic process	4	18	18	18	72.7	72.7	72.7	20.637	187
P18759	SEC18_YEAST	Vesicular-fusion protein SEC18	SEC18 YBR080C YBR0736	0.188523	0.535796	0.736718	-1.46104	adenyl nucleotide binding;adenyl ribonucleotide binding;ATP binding;ATPase activity;binding;catalytic activity;hydrolase activity;hydrolase activity, acting on acid anhydrides;hydrolase activity, acting on acid anhydrides, in phosphorus-containing anhydrides;nucleoside-triphosphatase activity;nucleotide binding;purine nucleotide binding;purine ribonucleoside triphosphate binding;purine ribonucleo…	cell part;cytoplasmic part;Golgi apparatus;intracellular membrane-bounded organelle;intracellular organelle;intracellular part;membrane-bounded organelle;organelle	cellular component assembly;cellular component disassembly;cellular component organization;cellular membrane organization;cellular process;establishment of localization;Golgi vesicle transport;membrane docking;membrane fusion;membrane organization;organelle assembly;organelle fusion;organelle organization;protein transport;transport;vacuole organization;vesicle organization;vesicle-mediated trans…	4	29	29	29	44.9	44.9	44.9	84.055	758
P47075	VTC4_YEAST	Vacuolar transporter chaperone 4 (Phosphate metabolism protein 3)	VTC4 PHM3 YJL012C J1345	0.258228	0.596419	0.624436	-1.47908	catalytic activity;kinase activity;phosphotransferase activity, phosphate group as acceptor;polyphosphate kinase activity;transferase activity;transferase activity, transferring phosphorus-containing groups	cell part;cytoplasmic part;endoplasmic reticulum;integral to membrane;intracellular membrane-bounded organelle;intracellular organelle;intracellular organelle part;intracellular part;intrinsic to membrane;intrinsic to organelle membrane;intrinsic to vacuolar membrane;macromolecular complex;membrane part;membrane-bounded organelle;organelle;organelle part;protein complex;vacuolar part;vacuolar tra…	autophagy;catabolic process;cellular component organization;cellular membrane organization;cellular metabolic process;cellular process;establishment of localization;membrane fusion;membrane invagination;membrane organization;metabolic process;organelle organization;phosphorus metabolic process;transport;vacuolar transport;vacuole organization	4	42	42	42	52	52	52	83.154	721
P41811	COPB2_YEAST	Coatomer subunit beta' (Beta'-coat protein) (Beta'-COP)	SEC27 YGL137W G2827	0.190316	0.227582	0.979467	-1.39736	binding;protein binding;small conjugating protein binding;structural molecule activity;ubiquitin binding	cell part;COPI vesicle coat;cytoplasmic part;cytoplasmic vesicle part;Golgi apparatus part;intracellular organelle part;intracellular part;macromolecular complex;membrane coat;membrane part;organelle part;protein complex;vesicle coat	cellular process;endosome transport;establishment of localization;Golgi vesicle transport;protein transport;transport;vacuolar transport;vesicle-mediated transport	4	37	37	37	61.6	61.6	61.6	99.444	889
P39003	HXT6_YEAST	High-affinity hexose transporter HXT6	HXT6 YDR343C D9651.12	0.136827	0.248339	1.00019	-1.38536	carbohydrate transmembrane transporter activity;fructose transmembrane transporter activity;glucose transmembrane transporter activity;hexose transmembrane transporter activity;mannose transmembrane transporter activity;monosaccharide transmembrane transporter activity;substrate-specific transmembrane transporter activity;substrate-specific transporter activity;sugar transmembrane transporter act…	cell part;integral to membrane;intrinsic to membrane;membrane;membrane part;plasma membrane	carbohydrate transport;cellular process;establishment of localization;transmembrane transport;transport	4	22	22	3	38.4	38.4	3.5	62.704	570
P47096	3HAO_YEAST	3-hydroxyanthranilate 3,4-dioxygenase (EC 1.13.11.6) (3-hydroxyanthranilate oxygenase) (3-HAO) (3-hydroxyanthranilic acid dioxygenase) (HAD) (Biosynthesis of nicotinic acid protein 1)	BNA1 HAD1 YJR025C J1550	0.662803	0.240445	0.571838	-1.47509	3-hydroxyanthranilate 3,4-dioxygenase activity;binding;catalytic activity;cation binding;dioxygenase activity;ferrous iron binding;ion binding;iron ion binding;metal ion binding;oxidoreductase activity;oxidoreductase activity, acting on single donors with incorporation of molecular oxygen;oxidoreductase activity, acting on single donors with incorporation of molecular oxygen, incorporation of two…	cell part;cytoplasm;intracellular membrane-bounded organelle;intracellular organelle;intracellular part;membrane-bounded organelle;nucleus;organelle	amine metabolic process;biosynthetic process;catabolic process;cellular amino acid metabolic process;cellular aromatic compound metabolic process;cellular ketone metabolic process;cellular metabolic process;cellular nitrogen compound metabolic process;cellular process;cofactor metabolic process;heterocycle metabolic process;metabolic process;nitrogen compound metabolic process;nucleobase-containi…	4	12	12	12	83.1	83.1	83.1	20.235	177
Q12159	YRA1_YEAST	RNA annealing protein YRA1	YRA1 YDR381W D9481.2 D9509.1	0.604894	0.328439	0.555751	-1.48908	binding;nucleic acid binding;nucleotide binding;RNA binding	cell part;intracellular organelle part;intracellular part;macromolecular complex;nuclear part;organelle part;protein complex;transcription export complex	biological regulation;biosynthetic process;cellular metabolic process;cellular nitrogen compound metabolic process;cellular process;DNA metabolic process;DNA repair;establishment of localization;macromolecule metabolic process;metabolic process;nitrogen compound metabolic process;nuclear transport;nucleobase-containing compound metabolic process;nucleobase-containing compound transport;nucleocyto…	4	13	13	13	51.8	51.8	51.8	24.955	226
P27616	PUR7_YEAST	Phosphoribosylaminoimidazole-succinocarboxamide synthase (EC 6.3.2.6) (SAICAR synthetase)	ADE1 YAR015W	0.674707	0.313509	0.495386	-1.4836	acid-amino acid ligase activity;adenyl nucleotide binding;adenyl ribonucleotide binding;ATP binding;binding;catalytic activity;ligase activity;ligase activity, forming carbon-nitrogen bonds;nucleotide binding;phosphoribosylaminoimidazolesuccinocarboxamide synthase activity;purine nucleotide binding;purine ribonucleoside triphosphate binding;purine ribonucleotide binding;ribonucleotide binding		biosynthetic process;cellular metabolic process;cellular nitrogen compound metabolic process;cellular process;heterocycle metabolic process;metabolic process;nitrogen compound metabolic process;nucleobase-containing compound metabolic process;nucleobase-containing small molecule metabolic process;nucleotide metabolic process;primary metabolic process;small molecule metabolic process	4	28	28	28	83	83	83	34.603	306
Q12123	DCS2_YEAST	Inactive diphosphatase DCS2 (Histidine triad protein) (Protein Dcs2p)	DCS2 YOR173W O3625	0.653441	0.343394	0.491091	-1.48793	binding;catalytic activity;enzyme inhibitor activity;enzyme regulator activity;hydrolase activity;identical protein binding;protein binding;protein dimerization activity;protein heterodimerization activity;protein homodimerization activity	cell part;cytoplasm;cytoplasmic mRNA processing body;cytoplasmic part;intracellular non-membrane-bounded organelle;intracellular organelle;intracellular part;macromolecular complex;non-membrane-bounded organelle;organelle;perinuclear region of cytoplasm;ribonucleoprotein complex;RNA granule	biological regulation;catabolic process;cell communication;cellular metabolic process;cellular nitrogen compound metabolic process;cellular process;macromolecule metabolic process;metabolic process;mRNA metabolic process;nitrogen compound metabolic process;nucleobase-containing compound metabolic process;primary metabolic process;response to abiotic stimulus;response to chemical stimulus;response…	4	27	27	27	70.5	70.5	70.5	40.94	353
P01097	ATIF_YEAST	ATPase inhibitor, mitochondrial	INH1 YDL181W D1305	0.821715	0.255046	0.378143	-1.4549	ATPase inhibitor activity;ATPase regulator activity;enzyme inhibitor activity;enzyme regulator activity;nucleoside-triphosphatase regulator activity	cell part;cytoplasmic part;intracellular membrane-bounded organelle;intracellular organelle;intracellular part;membrane-bounded organelle;mitochondrion;organelle	biological regulation	4	8	8	8	51.8	51.8	51.8	9.87	85
P35719	MRP8_YEAST	Uncharacterized protein MRP8	MRP8 YKL142W YKL3	0.733945	0.25679	0.480493	-1.47123		cell part;cytoplasm;intracellular part		4	23	23	23	85.4	85.4	85.4	25.097	219
P14742	GFA1_YEAST	Glutamine--fructose-6-phosphate aminotransferase [isomerizing] (GFAT) (EC 2.6.1.16) (D-fructose-6-phosphate amidotransferase) (Hexosephosphate aminotransferase)	GFA1 YKL104C YKL457	0.579711	0.47465	0.443078	-1.49744	binding;carbohydrate binding;catalytic activity;glutamine-fructose-6-phosphate transaminase (isomerizing) activity;transaminase activity;transferase activity;transferase activity, transferring nitrogenous groups		alcohol metabolic process;amine metabolic process;biosynthetic process;carbohydrate metabolic process;cell wall organization or biogenesis;cellular amino acid metabolic process;cellular cell wall organization or biogenesis;cellular ketone metabolic process;cellular metabolic process;cellular nitrogen compound metabolic process;cellular process;macromolecule metabolic process;metabolic process;nit…	4	46	46	46	70.6	70.6	70.6	80.046	717
P25694	CDC48_YEAST	Cell division control protein 48 (Cell division cycle protein 48)	CDC48 YDL126C	0.515233	0.464122	0.520163	-1.49952	adenyl nucleotide binding;adenyl ribonucleotide binding;ATP binding;ATPase activity;binding;catalytic activity;enzyme regulator activity;hydrolase activity;hydrolase activity, acting on acid anhydrides;hydrolase activity, acting on acid anhydrides, in phosphorus-containing anhydrides;identical protein binding;nucleoside-triphosphatase activity;nucleotide binding;phosphatase regulator activity;pro…	Cdc48p-Npl4p-Ufd1p AAA ATPase complex;cell part;cytoplasmic part;cytoplasmic ubiquitin ligase complex;cytosol;Doa10p ubiquitin ligase complex;endoplasmic reticulum membrane;endoplasmic reticulum part;ER ubiquitin ligase complex;Hrd1p ubiquitin ligase complex;Hrd1p ubiquitin ligase ERAD-L complex;intracellular membrane-bounded organelle;intracellular organelle;intracellular organelle part;intracel…	autophagy;biological regulation;catabolic process;cell communication;cellular component disassembly;cellular component organization;cellular membrane organization;cellular metabolic process;cellular nitrogen compound metabolic process;cellular process;cytoskeleton organization;establishment of localization;macromolecule metabolic process;membrane fusion;membrane invagination;membrane organization…	4	71	71	71	80.7	80.7	80.7	91.995	835
P41920	YRB1_YEAST	Ran-specific GTPase-activating protein 1 (Chromosome stability protein 20) (Perinuclear array-localized protein) (Ran-binding protein 1) (RANBP1)	YRB1 CST20 HTN1 SFO1 YDR002W YD8119.08	0.559848	0.408571	0.528391	-1.49681	binding;enzyme activator activity;enzyme binding;enzyme regulator activity;GTPase activator activity;GTPase binding;GTPase regulator activity;nucleoside-triphosphatase regulator activity;protein binding;Ran GTPase binding;Ras GTPase binding;small GTPase binding	cell part;cytoplasm;intracellular membrane-bounded organelle;intracellular organelle;intracellular part;membrane-bounded organelle;nucleus;organelle	catabolic process;cellular metabolic process;cellular process;establishment of localization;macromolecule metabolic process;metabolic process;nuclear transport;nucleobase-containing compound transport;nucleocytoplasmic transport;primary metabolic process;protein metabolic process;protein targeting;protein transport;proteolysis;proteolysis involved in cellular protein catabolic process;transport	4	10	10	10	60.2	60.2	60.2	22.953	201
P17555	CAP_YEAST	Adenylyl cyclase-associated protein (CAP)	SRV2 CAP1 YNL138W N1210 N1838	0.485955	0.388057	0.619239	-1.49325	actin binding;adenylate cyclase binding;binding;cytoskeletal protein binding;enzyme binding;identical protein binding;protein binding	actin cortical patch;cell cortex part;cell part;cytoplasmic part;cytoskeletal part;intracellular organelle part;intracellular part;organelle part	anatomical structure morphogenesis;biological regulation;cell morphogenesis;cellular component morphogenesis;cellular component organization;cellular process;cytoskeleton organization;developmental process;organelle organization;response to stimulus;signal transduction	4	24	24	24	68.4	68.4	68.4	57.521	526
P38934	BFR1_YEAST	Nuclear segregation protein BFR1 (Brefeldin A resistance protein 1)	BFR1 YOR198C	0.349438	0.550266	0.591869	-1.49157	binding;nucleic acid binding;RNA binding	cell part;cytoplasm;cytoplasmic part;endoplasmic reticulum;intracellular membrane-bounded organelle;intracellular organelle;intracellular part;macromolecular complex;membrane;membrane part;membrane-bounded organelle;nuclear outer membrane-endoplasmic reticulum membrane network;organelle;polysome;ribonucleoprotein complex	biological regulation;cellular localization;cellular metabolic process;cellular nitrogen compound metabolic process;cellular process;localization;macromolecule metabolic process;meiosis;metabolic process;mRNA metabolic process;nitrogen compound metabolic process;nucleobase-containing compound metabolic process;primary metabolic process;regulation of cell cycle;regulation of mitotic cell cycle;reg…	4	54	54	54	72.6	72.6	72.6	54.639	470
P32074	COPG_YEAST	Coatomer subunit gamma (Gamma-coat protein) (Gamma-COP)	SEC21 YNL287W N0543	0.389156	0.680936	0.416882	-1.48697	structural molecule activity	cell part;COPI vesicle coat;cytoplasmic part;cytoplasmic vesicle part;endosome;Golgi apparatus part;intracellular membrane-bounded organelle;intracellular organelle;intracellular organelle part;intracellular part;macromolecular complex;membrane coat;membrane part;membrane-bounded organelle;organelle;organelle part;protein complex;vesicle coat	cellular process;establishment of localization;Golgi vesicle transport;protein transport;transport;vesicle-mediated transport	4	45	45	45	63	63	63	104.83	935
P07342	ILVB_YEAST	Acetolactate synthase catalytic subunit, mitochondrial (EC 2.2.1.6) (Acetohydroxy-acid synthase catalytic subunit) (AHAS) (ALS)	ILV2 SMR1 YMR108W YM9718.07	0.489219	0.618522	0.385425	-1.49317	acetolactate synthase activity;binding;catalytic activity;cation binding;coenzyme binding;cofactor binding;flavin adenine dinucleotide binding;ion binding;magnesium ion binding;metal ion binding;thiamine pyrophosphate binding;transferase activity;transferase activity, transferring aldehyde or ketonic groups;vitamin binding	acetolactate synthase complex;cell part;cytoplasmic part;intracellular membrane-bounded organelle;intracellular organelle;intracellular part;macromolecular complex;membrane-bounded organelle;mitochondrion;organelle;protein complex	amine metabolic process;biosynthetic process;cellular amino acid metabolic process;cellular ketone metabolic process;cellular metabolic process;cellular nitrogen compound metabolic process;cellular process;metabolic process;nitrogen compound metabolic process;organic acid metabolic process;primary metabolic process;small molecule metabolic process	4	34	34	34	55.2	55.2	55.2	74.936	687
Q12458	YPR1_YEAST	Putative reductase 1 (EC 1.1.1.-)	YPR1 YDR368W D9481.8	0.431341	0.535349	0.531569	-1.49826	alcohol dehydrogenase (NADP+) activity;alditol:NADP+ 1-oxidoreductase activity;aldo-keto reductase (NADP) activity;carbonyl reductase (NADPH) activity;catalytic activity;oxidoreductase activity;oxidoreductase activity, acting on CH-OH group of donors;oxidoreductase activity, acting on the CH-OH group of donors, NAD or NADP as acceptor	cell part;cytoplasm;intracellular part	alcohol metabolic process;carbohydrate metabolic process;catabolic process;cellular metabolic process;cellular process;metabolic process;primary metabolic process;response to chemical stimulus;response to oxidative stress;response to stimulus;response to stress;small molecule metabolic process	4	23	23	22	72.1	72.1	68.9	34.755	312
P37292	GLYM_YEAST	Serine hydroxymethyltransferase, mitochondrial (SHMT) (EC 2.1.2.1) (Glycine hydroxymethyltransferase) (Serine methylase)	SHM1 SHMT1 YBR263W YBR1732	0.502408	0.583457	0.410381	-1.49625	binding;catalytic activity;cofactor binding;glycine hydroxymethyltransferase activity;hydroxymethyl-, formyl- and related transferase activity;pyridoxal phosphate binding;transferase activity;transferase activity, transferring one-carbon groups;vitamin B6 binding;vitamin binding	cell part;cytoplasmic part;intracellular membrane-bounded organelle;intracellular organelle;intracellular part;membrane-bounded organelle;mitochondrion;organelle	amine metabolic process;biosynthetic process;cellular amino acid metabolic process;cellular aromatic compound metabolic process;cellular ketone metabolic process;cellular metabolic process;cellular nitrogen compound metabolic process;cellular process;cofactor metabolic process;heterocycle metabolic process;metabolic process;nitrogen compound metabolic process;one-carbon metabolic process;organic …	4	30	29	29	64.9	63.5	63.5	53.686	490
P17649	GABAT_YEAST	4-aminobutyrate aminotransferase (EC 2.6.1.19) (GABA aminotransferase) (GABA-AT) (Gamma-amino-N-butyrate transaminase) (GABA transaminase)	UGA1 YGR019W	0.528179	0.561124	0.407419	-1.49672	4-aminobutyrate transaminase activity;binding;catalytic activity;cofactor binding;pyridoxal phosphate binding;transaminase activity;transferase activity;transferase activity, transferring nitrogenous groups;vitamin B6 binding;vitamin binding	cell part;cytoplasmic part;cytosol;intracellular part	amine metabolic process;catabolic process;cellular amino acid metabolic process;cellular ketone metabolic process;cellular metabolic process;cellular nitrogen compound metabolic process;cellular process;metabolic process;nitrogen compound metabolic process;organic acid metabolic process;primary metabolic process;small molecule metabolic process	4	33	33	33	74.9	74.9	74.9	52.946	471
P14832	CYPH_YEAST	Peptidyl-prolyl cis-trans isomerase (PPIase) (EC 5.2.1.8) (Cyclophilin) (CPH) (Cyclosporin A-binding protein) (PPI-II) (Rotamase)	CPR1 CPH1 CYP1 SCC1 YDR155C YD8358.10C	0.637134	0.499729	0.353009	-1.48987	binding;catalytic activity;cis-trans isomerase activity;cyclosporin A binding;drug binding;isomerase activity;peptide binding;peptidyl-prolyl cis-trans isomerase activity	cell part;chromatin remodeling complex;chromosomal part;cytoplasmic part;histone deacetylase complex;intracellular membrane-bounded organelle;intracellular organelle;intracellular organelle part;intracellular part;macromolecular complex;membrane-bounded organelle;membrane-enclosed lumen;mitochondrial intermembrane space;mitochondrial part;nuclear chromosome part;nuclear part;nucleoplasm part;nucl…	anatomical structure development;anatomical structure formation involved in morphogenesis;ascospore formation;biological regulation;cell development;cell differentiation;cellular component organization;cellular metabolic process;cellular process;chromatin modification;chromatin organization;chromosome organization;developmental process;establishment of localization;histone modification;macromolec…	4	17	17	17	90.7	90.7	90.7	17.39	162
P32263	P5CR_YEAST	Pyrroline-5-carboxylate reductase (P5C reductase) (P5CR) (EC 1.5.1.2)	PRO3 ORE2 YER023W	0.575009	0.593194	0.320094	-1.4883	binding;catalytic activity;identical protein binding;oxidoreductase activity;oxidoreductase activity, acting on the CH-NH group of donors;oxidoreductase activity, acting on the CH-NH group of donors, NAD or NADP as acceptor;protein binding;pyrroline-5-carboxylate reductase activity	cell part;cytoplasm;intracellular part	amine metabolic process;biosynthetic process;cellular amino acid metabolic process;cellular ketone metabolic process;cellular metabolic process;cellular nitrogen compound metabolic process;cellular process;heterocycle metabolic process;metabolic process;nitrogen compound metabolic process;organic acid metabolic process;primary metabolic process;small molecule metabolic process	4	13	13	13	65.7	65.7	65.7	30.131	286
P17423	KHSE_YEAST	Homoserine kinase (HK) (HSK) (EC 2.7.1.39)	THR1 YHR025W	0.665305	0.503567	0.315748	-1.48462	adenyl nucleotide binding;adenyl ribonucleotide binding;amino acid kinase activity;ATP binding;binding;catalytic activity;homoserine kinase activity;kinase activity;nucleotide binding;phosphotransferase activity, alcohol group as acceptor;purine nucleotide binding;purine ribonucleoside triphosphate binding;purine ribonucleotide binding;ribonucleotide binding;transferase activity;transferase activ…		amine metabolic process;biosynthetic process;cellular amino acid metabolic process;cellular ketone metabolic process;cellular metabolic process;cellular nitrogen compound metabolic process;cellular process;metabolic process;nitrogen compound metabolic process;organic acid metabolic process;primary metabolic process;small molecule metabolic process;sulfur compound metabolic process	4	15	15	15	52.9	52.9	52.9	38.712	357
P54114	ALDH3_YEAST	Aldehyde dehydrogenase [NAD(P)+] 2 (EC 1.2.1.3)	ALD3 ALD4 YMR169C YM8520.18C	0.775014	0.444209	0.244431	-1.46365	aldehyde dehydrogenase (NAD) activity;catalytic activity;oxidoreductase activity;oxidoreductase activity, acting on the aldehyde or oxo group of donors;oxidoreductase activity, acting on the aldehyde or oxo group of donors, NAD or NADP as acceptor	cell part;cytoplasm;intracellular part	amine metabolic process;biosynthetic process;catabolic process;cellular amino acid metabolic process;cellular ketone metabolic process;cellular metabolic process;cellular nitrogen compound metabolic process;cellular process;cofactor metabolic process;metabolic process;nitrogen compound metabolic process;organic acid metabolic process;primary metabolic process;small molecule metabolic process;vita…	4	41	41	18	79.8	79.8	46	55.385	506
Q04636	POB3_YEAST	FACT complex subunit POB3 (Facilitates chromatin transcription complex subunit POB3)	POB3 YML069W	0.663485	0.575035	0.235771	-1.47429	binding;DNA binding;nucleic acid binding	cell part;chromatin;chromosomal part;FACT complex;intracellular organelle part;intracellular part;macromolecular complex;nuclear chromatin;nuclear chromosome part;nuclear part;nucleoplasm part;organelle part;protein complex;replication fork protection complex;transcription elongation factor complex	biological regulation;biosynthetic process;cellular component organization;cellular metabolic process;cellular nitrogen compound metabolic process;cellular process;chromatin organization;chromosome organization;DNA metabolic process;DNA repair;DNA replication;macromolecule metabolic process;metabolic process;nitrogen compound metabolic process;nucleobase-containing compound metabolic process;orga…	4	25	25	25	54	54	54	62.993	552
P38716	YHR2_YEAST	Uncharacterized trans-sulfuration enzyme YHR112C	YHR112C	0.843179	0.391093	0.211834	-1.44611	binding;carbon-sulfur lyase activity;catalytic activity;cofactor binding;cystathionine beta-lyase activity;lyase activity;pyridoxal phosphate binding;vitamin B6 binding;vitamin binding	cell part;cytoplasm;intracellular membrane-bounded organelle;intracellular organelle;intracellular part;membrane-bounded organelle;nucleus;organelle	cellular metabolic process;cellular process;metabolic process;sulfur compound metabolic process	4	17	17	17	51.1	51.1	51.1	42.445	378
P20606	SAR1_YEAST	Small COPII coat GTPase SAR1 (EC 3.6.5.-) (GTP-binding protein SAR1) (Secretion-associated RAS-related protein 1)	SAR1 YPL218W	0.731241	0.523311	0.210721	-1.46527	binding;catalytic activity;GTP binding;GTPase activity;guanyl nucleotide binding;guanyl ribonucleotide binding;hydrolase activity;hydrolase activity, acting on acid anhydrides;hydrolase activity, acting on acid anhydrides, in phosphorus-containing anhydrides;nucleoside-triphosphatase activity;nucleotide binding;purine nucleotide binding;purine ribonucleoside triphosphate binding;purine ribonucleo…	cell part;COPII vesicle coat;cytoplasmic part;cytoplasmic vesicle part;endoplasmic reticulum exit site;endoplasmic reticulum membrane;endoplasmic reticulum part;Golgi apparatus part;Golgi membrane;intracellular organelle part;intracellular part;macromolecular complex;membrane;membrane coat;membrane part;organelle membrane;organelle part;protein complex;vesicle coat	biological regulation;catabolic process;cellular component organization;cellular metabolic process;cellular nitrogen compound metabolic process;cellular process;establishment of localization;heterocycle metabolic process;metabolic process;nitrogen compound metabolic process;nucleobase-containing compound catabolic process;nucleobase-containing compound metabolic process;nucleobase-containing smal…	4	13	13	13	86.8	86.8	86.8	21.45	190
P38234	RFS1_YEAST	Protein RFS1 (RAD55 suppressor protein 1)	RFS1 YBR052C YBR0505	0.685198	0.548708	0.239833	-1.47374	binding;catalytic activity;coenzyme binding;cofactor binding;FMN binding;nucleotide binding;oxidoreductase activity	cell part;cytoplasm;intracellular part;membrane part;membrane raft		4	13	13	13	69	69	69	22.921	210
P81449	ATPJ_YEAST	ATP synthase subunit e, mitochondrial (ATPase subunit e) (Translocase of the inner membrane protein 11)	TIM11 ATP21 YDR322C-A YDR322BC	0.602483	-0.0217934	0.820497	-1.40119	cation transmembrane transporter activity;hydrogen ion transmembrane transporter activity;inorganic cation transmembrane transporter activity;ion transmembrane transporter activity;monovalent inorganic cation transmembrane transporter activity;structural molecule activity;substrate-specific transmembrane transporter activity;substrate-specific transporter activity;transmembrane transporter activi…	cell part;cytoplasmic part;intracellular organelle part;intracellular part;macromolecular complex;membrane part;mitochondrial membrane part;mitochondrial part;mitochondrial proton-transporting ATP synthase complex, coupling factor F(o);organelle part;protein complex;proton-transporting ATP synthase complex, coupling factor F(o);proton-transporting two-sector ATPase complex, proton-transporting do…	biosynthetic process;cellular component assembly;cellular component organization;cellular membrane organization;cellular metabolic process;cellular nitrogen compound metabolic process;cellular process;establishment of localization;heterocycle metabolic process;hydrogen transport;ion transport;macromolecular complex assembly;membrane organization;metabolic process;mitochondrion organization;nitrog…	4	9	9	9	71.9	71.9	71.9	10.875	96
P15873	PCNA_YEAST	Proliferating cell nuclear antigen (PCNA)	POL30 YBR088C YBR0811	0.567298	-0.0543008	0.871251	-1.38425	binding;DNA binding;DNA polymerase processivity factor activity;enzyme regulator activity;identical protein binding;nucleic acid binding;protein binding	cell part;chromosomal part;intracellular membrane-bounded organelle;intracellular organelle;intracellular organelle part;intracellular part;macromolecular complex;membrane-bounded organelle;nucleus;organelle;organelle part;PCNA complex;protein complex;replication fork	biological regulation;biosynthetic process;cell cycle;cellular component organization;cellular metabolic process;cellular nitrogen compound metabolic process;cellular process;chromosome organization;DNA metabolic process;DNA repair;gene silencing;macromolecule metabolic process;metabolic process;mitotic cell cycle;nitrogen compound metabolic process;nucleobase-containing compound metabolic proces…	4	17	17	17	69.8	69.8	69.8	28.916	258
P38431	IF5_YEAST	Eukaryotic translation initiation factor 5 (eIF-5)	TIF5 YPR041W YP3085.05	0.708889	-0.155045	0.800127	-1.35397	binding;enzyme activator activity;enzyme regulator activity;GDP-dissociation inhibitor activity;GTP binding;GTPase activator activity;GTPase regulator activity;guanyl nucleotide binding;guanyl ribonucleotide binding;nucleic acid binding;nucleoside-triphosphatase regulator activity;nucleotide binding;protein binding;purine nucleotide binding;purine ribonucleoside triphosphate binding;purine ribonu…	cell part;cytoplasmic part;cytosolic small ribosomal subunit;eukaryotic 48S preinitiation complex;intracellular organelle part;intracellular part;macromolecular complex;multi-eIF complex;organelle part;ribonucleoprotein complex;small ribosomal subunit;translation preinitiation complex	biological regulation;cellular component assembly;cellular component organization;cellular macromolecular complex assembly;cellular process;macromolecular complex assembly;organelle assembly;regulation of translation;ribonucleoprotein complex assembly;ribosome assembly	4	21	21	21	64.2	64.2	64.2	45.261	405
Q00711	SDHA_YEAST	Succinate dehydrogenase [ubiquinone] flavoprotein subunit, mitochondrial (EC 1.3.5.1) (Flavoprotein subunit of complex II) (FP)	SDH1 SDHA YKL148C YKL602	0.751544	-0.152142	0.756801	-1.3562	binding;catalytic activity;coenzyme binding;cofactor binding;flavin adenine dinucleotide binding;oxidoreductase activity;oxidoreductase activity, acting on the CH-CH group of donors;oxidoreductase activity, acting on the CH-CH group of donors, quinone or related compound as acceptor;succinate dehydrogenase (ubiquinone) activity;succinate dehydrogenase activity	cell part;cytoplasmic part;fumarate reductase complex;intracellular membrane-bounded organelle;intracellular organelle;intracellular organelle part;intracellular part;macromolecular complex;membrane;membrane part;membrane-bounded organelle;mitochondrial membrane;mitochondrial membrane part;mitochondrial part;mitochondrial respiratory chain complex II;mitochondrion;organelle;organelle membrane;org…	catabolic process;cellular metabolic process;cellular process;cellular respiration;cofactor metabolic process;generation of precursor metabolites and energy;metabolic process	4	24	24	21	49.5	49.5	42.3	70.229	640
P19262	ODO2_YEAST	Dihydrolipoyllysine-residue succinyltransferase component of 2-oxoglutarate dehydrogenase complex, mitochondrial (EC 2.3.1.61) (2-oxoglutarate dehydrogenase complex component E2) (OGDC-E2) (Dihydrolipoamide succinyltransferase component of 2-oxoglutarate dehydrogenase complex)	KGD2 YDR148C YD8358.05C	0.510596	0.232987	0.725604	-1.46919	catalytic activity;dihydrolipoyllysine-residue succinyltransferase activity;S-acyltransferase activity;S-succinyltransferase activity;succinyltransferase activity;transferase activity;transferase activity, transferring acyl groups;transferase activity, transferring acyl groups other than amino-acyl groups	cell part;cytoplasmic part;intracellular non-membrane-bounded organelle;intracellular organelle;intracellular organelle part;intracellular part;macromolecular complex;mitochondrial nucleoid;mitochondrial oxoglutarate dehydrogenase complex;mitochondrial part;non-membrane-bounded organelle;nucleoid;organelle;organelle part;oxoglutarate dehydrogenase complex;protein complex	amine metabolic process;catabolic process;cellular amino acid metabolic process;cellular component organization;cellular ketone metabolic process;cellular metabolic process;cellular nitrogen compound metabolic process;cellular process;cofactor metabolic process;metabolic process;mitochondrion organization;nitrogen compound metabolic process;organelle organization;organic acid metabolic process;pr…	4	18	18	18	43.8	43.8	43.8	50.43	463
P33204	ARPC4_YEAST	Actin-related protein 2/3 complex subunit 4 (Arp2/3 complex 20 kDa) (p20-ARC)	ARC19 YKL013C YKL166	0.64009	0.101862	0.702491	-1.44444	structural molecule activity	actin cortical patch;Arp2/3 protein complex;cell cortex part;cell part;cytoplasmic part;cytoskeletal part;intracellular organelle part;intracellular part;macromolecular complex;organelle part;protein complex	biological regulation;cellular component assembly;cellular component organization;cellular localization;cellular macromolecular complex assembly;cellular process;cytoskeleton organization;localization;macromolecular complex assembly;mitochondrion organization;organelle inheritance;organelle localization;organelle organization;protein complex assembly;protein polymerization;regulation of organelle…	4	7	7	7	60.8	60.8	60.8	19.916	171
P04147	PABP_YEAST	Polyadenylate-binding protein, cytoplasmic and nuclear (PABP) (Poly(A)-binding protein) (ARS consensus-binding protein ACBP-67) (Polyadenylate tail-binding protein)	PAB1 YER165W	0.54678	0.123689	0.774038	-1.44451	binding;enzyme inhibitor activity;enzyme regulator activity;mRNA binding;nucleic acid binding;nucleotide binding;poly(A) RNA binding;poly-purine tract binding;ribonuclease inhibitor activity;RNA binding;single-stranded RNA binding	cell part;cytoplasm;cytoplasmic part;intracellular membrane-bounded organelle;intracellular non-membrane-bounded organelle;intracellular organelle;intracellular part;macromolecular complex;membrane-bounded organelle;non-membrane-bounded organelle;nucleus;organelle;ribonucleoprotein complex;ribosome;RNA granule;stress granule	biological regulation;cellular metabolic process;cellular nitrogen compound metabolic process;cellular process;establishment of localization;macromolecule metabolic process;metabolic process;mRNA metabolic process;mRNA processing;nitrogen compound metabolic process;nucleobase-containing compound metabolic process;nucleobase-containing compound transport;primary metabolic process;regulation of tra…	4	40	40	40	69.7	69.7	69.7	64.343	577
P53839	GOR1_YEAST	Glyoxylate reductase 1 (EC 1.1.1.26)	GOR1 YNL274C N0631	0.813582	-0.039196	0.621943	-1.39633	binding;catalytic activity;coenzyme binding;cofactor binding;glyoxylate reductase activity;NAD binding;nucleotide binding;oxidoreductase activity;oxidoreductase activity, acting on CH-OH group of donors;oxidoreductase activity, acting on the CH-OH group of donors, NAD or NADP as acceptor	cell part;cytoplasmic part;intracellular membrane-bounded organelle;intracellular organelle;intracellular part;membrane-bounded organelle;mitochondrion;nucleus;organelle	catabolic process;cellular aldehyde metabolic process;cellular ketone metabolic process;cellular metabolic process;cellular process;metabolic process;organic acid metabolic process;small molecule metabolic process	4	22	22	22	76	76	76	38.831	350
P00427	COX6_YEAST	Cytochrome c oxidase subunit 6, mitochondrial (EC 1.9.3.1) (Cytochrome c oxidase polypeptide VI)	COX6 YHR051W	0.87904	-0.175125	0.635178	-1.33909	binding;catalytic activity;cation binding;cation transmembrane transporter activity;cytochrome-c oxidase activity;heme-copper terminal oxidase activity;hydrogen ion transmembrane transporter activity;inorganic cation transmembrane transporter activity;ion binding;ion transmembrane transporter activity;metal ion binding;monovalent inorganic cation transmembrane transporter activity;oxidoreductase …	cell part;cytoplasmic part;intracellular organelle part;intracellular part;macromolecular complex;membrane part;mitochondrial membrane part;mitochondrial part;mitochondrial respiratory chain complex IV;organelle part;protein complex;respiratory chain complex IV	cellular metabolic process;cellular process;generation of precursor metabolites and energy;metabolic process	4	9	9	9	54.7	54.7	54.7	17.341	148
[truncated: 588 more rows]
