# Supplementary material for: Temporal profiling of redox-dependent heterogeneity in single cells
Source: eLife journal article supplement (doi:10.7554/elife.37623), 2018-06-05
Supplement: supp [file elife-37623-supp-v1.zip › elife_poa_e37623_Supplementary_File_3.xlsx]

## Sheet: Sheet1
proteins	log(pvalue)	Difference	Entry	Protein names	Gene names	Gene ontology (GO)	Gene ontology (biological_process)	Gene ontology (molecular_function)	Gene ontology (cellular_component)
ATP5E_YEAST	3.75201	1.37273	P21306	ATP synthase subunit epsilon, mitochondrial (ATPase subunit epsilon)	ATP15 YPL271W P0345	mitochondrial proton-transporting ATP synthase, central stalk [GO:0005756]; proton-transporting ATP synthase activity, rotational mechanism [GO:0046933]; ATP synthesis coupled proton transport [GO:0015986]	mitochondrial proton-transporting ATP synthase, central stalk [GO:0005756]; proton-transporting ATP synthase activity, rotational mechanism [GO:0046933]; ATP synthesis coupled proton transport [GO:0015986]	mitochondrial proton-transporting ATP synthase, central stalk [GO:0005756]; proton-transporting ATP synthase activity, rotational mechanism [GO:0046933]; ATP synthesis coupled proton transport [GO:0015986]	mitochondrial proton-transporting ATP synthase, central stalk [GO:0005756]; proton-transporting ATP synthase activity, rotational mechanism [GO:0046933]; ATP synthesis coupled proton transport [GO:0015986]
RS10A_YEAST	2.47766	1.35432	Q08745	40S ribosomal protein S10-A (Small ribosomal subunit protein eS10-A)	RPS10A YOR293W	cytosolic small ribosomal subunit [GO:0022627]; structural constituent of ribosome [GO:0003735]; cellular response to amino acid starvation [GO:0034198]; cytoplasmic translation [GO:0002181]; positive regulation of protein kinase activity [GO:0045860]; ribosomal small subunit assembly [GO:0000028]; rRNA export from nucleus [GO:0006407]	cytosolic small ribosomal subunit [GO:0022627]; structural constituent of ribosome [GO:0003735]; cellular response to amino acid starvation [GO:0034198]; cytoplasmic translation [GO:0002181]; positive regulation of protein kinase activity [GO:0045860]; ribosomal small subunit assembly [GO:0000028]; rRNA export from nucleus [GO:0006407]	cytosolic small ribosomal subunit [GO:0022627]; structural constituent of ribosome [GO:0003735]; cellular response to amino acid starvation [GO:0034198]; cytoplasmic translation [GO:0002181]; positive regulation of protein kinase activity [GO:0045860]; ribosomal small subunit assembly [GO:0000028]; rRNA export from nucleus [GO:0006407]	cytosolic small ribosomal subunit [GO:0022627]; structural constituent of ribosome [GO:0003735]; cellular response to amino acid starvation [GO:0034198]; cytoplasmic translation [GO:0002181]; positive regulation of protein kinase activity [GO:0045860]; ribosomal small subunit assembly [GO:0000028]; rRNA export from nucleus [GO:0006407]
GRE1_YEAST	1.45588	1.3423	Q08969	Protein GRE1 (Genes de respuesta a estres protein 1) (Hydrophilin)	GRE1 YPL223C	cytoplasm [GO:0005737]	cytoplasm [GO:0005737]	cytoplasm [GO:0005737]	cytoplasm [GO:0005737]
IML2_YEAST	1.8109	1.2885	P47031	Mitochondrial outer membrane protein IML2 (Increased minichromosome loss protein 2)	IML2 YJL082W J1007	integral component of membrane [GO:0016021]; mitochondrial outer membrane [GO:0005741]; cellular response to misfolded protein [GO:0071218]	integral component of membrane [GO:0016021]; mitochondrial outer membrane [GO:0005741]; cellular response to misfolded protein [GO:0071218]	integral component of membrane [GO:0016021]; mitochondrial outer membrane [GO:0005741]; cellular response to misfolded protein [GO:0071218]	integral component of membrane [GO:0016021]; mitochondrial outer membrane [GO:0005741]; cellular response to misfolded protein [GO:0071218]
SUR7_YEAST	1.2562	1.14625	P54003	Protein SUR7	SUR7 YML052W YM9958.11	cell cortex [GO:0005938]; integral component of membrane [GO:0016021]; membrane raft [GO:0045121]; plasma membrane [GO:0005886]; ascospore formation [GO:0030437]; cortical actin cytoskeleton organization [GO:0030866]; endocytosis [GO:0006897]; fungal-type cell wall organization [GO:0031505]; septin cytoskeleton organization [GO:0032185]	cell cortex [GO:0005938]; integral component of membrane [GO:0016021]; membrane raft [GO:0045121]; plasma membrane [GO:0005886]; ascospore formation [GO:0030437]; cortical actin cytoskeleton organization [GO:0030866]; endocytosis [GO:0006897]; fungal-type cell wall organization [GO:0031505]; septin cytoskeleton organization [GO:0032185]	cell cortex [GO:0005938]; integral component of membrane [GO:0016021]; membrane raft [GO:0045121]; plasma membrane [GO:0005886]; ascospore formation [GO:0030437]; cortical actin cytoskeleton organization [GO:0030866]; endocytosis [GO:0006897]; fungal-type cell wall organization [GO:0031505]; septin cytoskeleton organization [GO:0032185]	cell cortex [GO:0005938]; integral component of membrane [GO:0016021]; membrane raft [GO:0045121]; plasma membrane [GO:0005886]; ascospore formation [GO:0030437]; cortical actin cytoskeleton organization [GO:0030866]; endocytosis [GO:0006897]; fungal-type cell wall organization [GO:0031505]; septin cytoskeleton organization [GO:0032185]
PYRD_YEAST	1.4864	1.10657	P28272	Dihydroorotate dehydrogenase (fumarate) (DHOD) (DHODase) (DHOdehase) (EC 1.3.98.1) (Dihydroorotate oxidase)	URA1 YKL216W	cytoplasm [GO:0005737]; extrinsic component of membrane [GO:0019898]; dihydroorotate dehydrogenase (fumarate) activity [GO:1990663]; dihydroorotate dehydrogenase activity [GO:0004152]; 'de novo' pyrimidine nucleobase biosynthetic process [GO:0006207]; 'de novo' UMP biosynthetic process [GO:0044205]	cytoplasm [GO:0005737]; extrinsic component of membrane [GO:0019898]; dihydroorotate dehydrogenase (fumarate) activity [GO:1990663]; dihydroorotate dehydrogenase activity [GO:0004152]; 'de novo' pyrimidine nucleobase biosynthetic process [GO:0006207]; 'de novo' UMP biosynthetic process [GO:0044205]	cytoplasm [GO:0005737]; extrinsic component of membrane [GO:0019898]; dihydroorotate dehydrogenase (fumarate) activity [GO:1990663]; dihydroorotate dehydrogenase activity [GO:0004152]; 'de novo' pyrimidine nucleobase biosynthetic process [GO:0006207]; 'de novo' UMP biosynthetic process [GO:0044205]	cytoplasm [GO:0005737]; extrinsic component of membrane [GO:0019898]; dihydroorotate dehydrogenase (fumarate) activity [GO:1990663]; dihydroorotate dehydrogenase activity [GO:0004152]; 'de novo' pyrimidine nucleobase biosynthetic process [GO:0006207]; 'de novo' UMP biosynthetic process [GO:0044205]
IMB3_YEAST	1.32697	1.05409	P32337	Importin subunit beta-3 (Karyopherin subunit beta-3) (Karyopherin-121) (Protein secretion enhancer 1)	PSE1 KAP121 YMR308C YM9952.10C	cytoplasm [GO:0005737]; nuclear membrane [GO:0031965]; nuclear periphery [GO:0034399]; nucleus [GO:0005634]; nuclear localization sequence binding [GO:0008139]; protein transporter activity [GO:0008565]; mRNA export from nucleus [GO:0006406]; NLS-bearing protein import into nucleus [GO:0006607]; protein import into nucleus [GO:0006606]; protein import into nucleus, translocation [GO:0000060]; reg…	cytoplasm [GO:0005737]; nuclear membrane [GO:0031965]; nuclear periphery [GO:0034399]; nucleus [GO:0005634]; nuclear localization sequence binding [GO:0008139]; protein transporter activity [GO:0008565]; mRNA export from nucleus [GO:0006406]; NLS-bearing protein import into nucleus [GO:0006607]; protein import into nucleus [GO:0006606]; protein import into nucleus, translocation [GO:0000060]; reg…	cytoplasm [GO:0005737]; nuclear membrane [GO:0031965]; nuclear periphery [GO:0034399]; nucleus [GO:0005634]; nuclear localization sequence binding [GO:0008139]; protein transporter activity [GO:0008565]; mRNA export from nucleus [GO:0006406]; NLS-bearing protein import into nucleus [GO:0006607]; protein import into nucleus [GO:0006606]; protein import into nucleus, translocation [GO:0000060]; reg…	cytoplasm [GO:0005737]; nuclear membrane [GO:0031965]; nuclear periphery [GO:0034399]; nucleus [GO:0005634]; nuclear localization sequence binding [GO:0008139]; protein transporter activity [GO:0008565]; mRNA export from nucleus [GO:0006406]; NLS-bearing protein import into nucleus [GO:0006607]; protein import into nucleus [GO:0006606]; protein import into nucleus, translocation [GO:0000060]; reg…
TIM8_YEAST	2.25506	1.03368	P57744	Mitochondrial import inner membrane translocase subunit TIM8	TIM8 YJR135W-A YJR135BW	mitochondrial inner membrane [GO:0005743]; mitochondrial intermembrane space [GO:0005758]; mitochondrial intermembrane space protein transporter complex [GO:0042719]; metal ion binding [GO:0046872]; protein transporter activity [GO:0008565]; protein import into mitochondrial inner membrane [GO:0045039]; protein targeting to mitochondrion [GO:0006626]	mitochondrial inner membrane [GO:0005743]; mitochondrial intermembrane space [GO:0005758]; mitochondrial intermembrane space protein transporter complex [GO:0042719]; metal ion binding [GO:0046872]; protein transporter activity [GO:0008565]; protein import into mitochondrial inner membrane [GO:0045039]; protein targeting to mitochondrion [GO:0006626]	mitochondrial inner membrane [GO:0005743]; mitochondrial intermembrane space [GO:0005758]; mitochondrial intermembrane space protein transporter complex [GO:0042719]; metal ion binding [GO:0046872]; protein transporter activity [GO:0008565]; protein import into mitochondrial inner membrane [GO:0045039]; protein targeting to mitochondrion [GO:0006626]	mitochondrial inner membrane [GO:0005743]; mitochondrial intermembrane space [GO:0005758]; mitochondrial intermembrane space protein transporter complex [GO:0042719]; metal ion binding [GO:0046872]; protein transporter activity [GO:0008565]; protein import into mitochondrial inner membrane [GO:0045039]; protein targeting to mitochondrion [GO:0006626]
TSA2_YEAST	2.21798	0.988763	Q04120	Peroxiredoxin TSA2 (EC 1.11.1.15) (Cytoplasmic thiol peroxidase 2) (cTPx 2) (Thiol-specific antioxidant protein 2) (Thioredoxin peroxidase 2)	TSA2 YDR453C D9461.38	cytoplasm [GO:0005737]; peroxiredoxin activity [GO:0051920]; thioredoxin peroxidase activity [GO:0008379]; cell redox homeostasis [GO:0045454]; cellular response to oxidative stress [GO:0034599]; protein folding [GO:0006457]; protein stabilization [GO:0050821]	cytoplasm [GO:0005737]; peroxiredoxin activity [GO:0051920]; thioredoxin peroxidase activity [GO:0008379]; cell redox homeostasis [GO:0045454]; cellular response to oxidative stress [GO:0034599]; protein folding [GO:0006457]; protein stabilization [GO:0050821]	cytoplasm [GO:0005737]; peroxiredoxin activity [GO:0051920]; thioredoxin peroxidase activity [GO:0008379]; cell redox homeostasis [GO:0045454]; cellular response to oxidative stress [GO:0034599]; protein folding [GO:0006457]; protein stabilization [GO:0050821]	cytoplasm [GO:0005737]; peroxiredoxin activity [GO:0051920]; thioredoxin peroxidase activity [GO:0008379]; cell redox homeostasis [GO:0045454]; cellular response to oxidative stress [GO:0034599]; protein folding [GO:0006457]; protein stabilization [GO:0050821]
RS27A_YEAST	1.92204	0.972498	P35997	40S ribosomal protein S27-A (RP61) (Small ribosomal subunit protein eS27-A) (YS20)	RPS27A YKL156W	cytosolic small ribosomal subunit [GO:0022627]; metal ion binding [GO:0046872]; structural constituent of ribosome [GO:0003735]; cytoplasmic translation [GO:0002181]; maturation of SSU-rRNA from tricistronic rRNA transcript (SSU-rRNA, 5.8S rRNA, LSU-rRNA) [GO:0000462]; ribosomal small subunit assembly [GO:0000028]; translation [GO:0006412]	cytosolic small ribosomal subunit [GO:0022627]; metal ion binding [GO:0046872]; structural constituent of ribosome [GO:0003735]; cytoplasmic translation [GO:0002181]; maturation of SSU-rRNA from tricistronic rRNA transcript (SSU-rRNA, 5.8S rRNA, LSU-rRNA) [GO:0000462]; ribosomal small subunit assembly [GO:0000028]; translation [GO:0006412]	cytosolic small ribosomal subunit [GO:0022627]; metal ion binding [GO:0046872]; structural constituent of ribosome [GO:0003735]; cytoplasmic translation [GO:0002181]; maturation of SSU-rRNA from tricistronic rRNA transcript (SSU-rRNA, 5.8S rRNA, LSU-rRNA) [GO:0000462]; ribosomal small subunit assembly [GO:0000028]; translation [GO:0006412]	cytosolic small ribosomal subunit [GO:0022627]; metal ion binding [GO:0046872]; structural constituent of ribosome [GO:0003735]; cytoplasmic translation [GO:0002181]; maturation of SSU-rRNA from tricistronic rRNA transcript (SSU-rRNA, 5.8S rRNA, LSU-rRNA) [GO:0000462]; ribosomal small subunit assembly [GO:0000028]; translation [GO:0006412]
NNRE_YEAST	1.54518	0.960737	P40165	NAD(P)H-hydrate epimerase (EC 5.1.99.6) (NAD(P)HX epimerase)	YNL200C N1370	mitochondrion [GO:0005739]; metal ion binding [GO:0046872]; NADHX epimerase activity [GO:0052856]; NADPHX epimerase activity [GO:0052857]; nucleotide binding [GO:0000166]; nicotinamide nucleotide metabolic process [GO:0046496]	mitochondrion [GO:0005739]; metal ion binding [GO:0046872]; NADHX epimerase activity [GO:0052856]; NADPHX epimerase activity [GO:0052857]; nucleotide binding [GO:0000166]; nicotinamide nucleotide metabolic process [GO:0046496]	mitochondrion [GO:0005739]; metal ion binding [GO:0046872]; NADHX epimerase activity [GO:0052856]; NADPHX epimerase activity [GO:0052857]; nucleotide binding [GO:0000166]; nicotinamide nucleotide metabolic process [GO:0046496]	mitochondrion [GO:0005739]; metal ion binding [GO:0046872]; NADHX epimerase activity [GO:0052856]; NADPHX epimerase activity [GO:0052857]; nucleotide binding [GO:0000166]; nicotinamide nucleotide metabolic process [GO:0046496]
RPN13_YEAST	3.21599	0.957222	O13563	26S proteasome regulatory subunit RPN13 (Proteasome non-ATPase subunit 13)	RPN13 DAQ1 YLR421C	nucleus [GO:0005634]; proteasome regulatory particle, lid subcomplex [GO:0008541]; proteasome storage granule [GO:0034515]; endopeptidase activator activity [GO:0061133]; proteasome binding [GO:0070628]; ubiquitin binding [GO:0043130]; ubiquitin-dependent protein catabolic process [GO:0006511]	nucleus [GO:0005634]; proteasome regulatory particle, lid subcomplex [GO:0008541]; proteasome storage granule [GO:0034515]; endopeptidase activator activity [GO:0061133]; proteasome binding [GO:0070628]; ubiquitin binding [GO:0043130]; ubiquitin-dependent protein catabolic process [GO:0006511]	nucleus [GO:0005634]; proteasome regulatory particle, lid subcomplex [GO:0008541]; proteasome storage granule [GO:0034515]; endopeptidase activator activity [GO:0061133]; proteasome binding [GO:0070628]; ubiquitin binding [GO:0043130]; ubiquitin-dependent protein catabolic process [GO:0006511]	nucleus [GO:0005634]; proteasome regulatory particle, lid subcomplex [GO:0008541]; proteasome storage granule [GO:0034515]; endopeptidase activator activity [GO:0061133]; proteasome binding [GO:0070628]; ubiquitin binding [GO:0043130]; ubiquitin-dependent protein catabolic process [GO:0006511]
CHO2_YEAST	1.50355	0.936236	P05374	Phosphatidylethanolamine N-methyltransferase (PE methyltransferase) (PEAMT) (PEMT) (EC 2.1.1.17) (Choline-requiring protein 2)	CHO2 PEM1 YGR157W G6673	endoplasmic reticulum membrane [GO:0005789]; integral component of membrane [GO:0016021]; phosphatidylethanolamine N-methyltransferase activity [GO:0004608]; phosphatidylcholine biosynthetic process [GO:0006656]	endoplasmic reticulum membrane [GO:0005789]; integral component of membrane [GO:0016021]; phosphatidylethanolamine N-methyltransferase activity [GO:0004608]; phosphatidylcholine biosynthetic process [GO:0006656]	endoplasmic reticulum membrane [GO:0005789]; integral component of membrane [GO:0016021]; phosphatidylethanolamine N-methyltransferase activity [GO:0004608]; phosphatidylcholine biosynthetic process [GO:0006656]	endoplasmic reticulum membrane [GO:0005789]; integral component of membrane [GO:0016021]; phosphatidylethanolamine N-methyltransferase activity [GO:0004608]; phosphatidylcholine biosynthetic process [GO:0006656]
CET1_YEAST	2.02387	0.922885	O13297	mRNA-capping enzyme subunit beta (EC 3.1.3.33) (Polynucleotide 5'-triphosphatase) (mRNA 5'-triphosphatase) (TPase)	CET1 YPL228W P1433	mRNA cap methyltransferase complex [GO:0031533]; polynucleotide 5'-phosphatase activity [GO:0004651]; 7-methylguanosine mRNA capping [GO:0006370]; polynucleotide dephosphorylation [GO:0098501]; positive regulation of protein localization to nucleus [GO:1900182]; positive regulation of transcription elongation from RNA polymerase II promoter [GO:0032968]	mRNA cap methyltransferase complex [GO:0031533]; polynucleotide 5'-phosphatase activity [GO:0004651]; 7-methylguanosine mRNA capping [GO:0006370]; polynucleotide dephosphorylation [GO:0098501]; positive regulation of protein localization to nucleus [GO:1900182]; positive regulation of transcription elongation from RNA polymerase II promoter [GO:0032968]	mRNA cap methyltransferase complex [GO:0031533]; polynucleotide 5'-phosphatase activity [GO:0004651]; 7-methylguanosine mRNA capping [GO:0006370]; polynucleotide dephosphorylation [GO:0098501]; positive regulation of protein localization to nucleus [GO:1900182]; positive regulation of transcription elongation from RNA polymerase II promoter [GO:0032968]	mRNA cap methyltransferase complex [GO:0031533]; polynucleotide 5'-phosphatase activity [GO:0004651]; 7-methylguanosine mRNA capping [GO:0006370]; polynucleotide dephosphorylation [GO:0098501]; positive regulation of protein localization to nucleus [GO:1900182]; positive regulation of transcription elongation from RNA polymerase II promoter [GO:0032968]
DUT_YEAST	1.31465	0.905825	P33317	Deoxyuridine 5'-triphosphate nucleotidohydrolase (dUTPase) (EC 3.6.1.23) (dUTP pyrophosphatase)	DUT1 YBR252W YBR1705	dITP diphosphatase activity [GO:0035870]; dUTP diphosphatase activity [GO:0004170]; metal ion binding [GO:0046872]; dITP catabolic process [GO:0035863]; dUMP biosynthetic process [GO:0006226]; dUTP catabolic process [GO:0046081]; pyrimidine deoxyribonucleoside triphosphate catabolic process [GO:0009213]	dITP diphosphatase activity [GO:0035870]; dUTP diphosphatase activity [GO:0004170]; metal ion binding [GO:0046872]; dITP catabolic process [GO:0035863]; dUMP biosynthetic process [GO:0006226]; dUTP catabolic process [GO:0046081]; pyrimidine deoxyribonucleoside triphosphate catabolic process [GO:0009213]	dITP diphosphatase activity [GO:0035870]; dUTP diphosphatase activity [GO:0004170]; metal ion binding [GO:0046872]; dITP catabolic process [GO:0035863]; dUMP biosynthetic process [GO:0006226]; dUTP catabolic process [GO:0046081]; pyrimidine deoxyribonucleoside triphosphate catabolic process [GO:0009213]	dITP diphosphatase activity [GO:0035870]; dUTP diphosphatase activity [GO:0004170]; metal ion binding [GO:0046872]; dITP catabolic process [GO:0035863]; dUMP biosynthetic process [GO:0006226]; dUTP catabolic process [GO:0046081]; pyrimidine deoxyribonucleoside triphosphate catabolic process [GO:0009213]
H2B2_YEAST	2.76084	0.894397	P02294	Histone H2B.2	HTB2 H2B2 YBL002W YBL0104	nuclear nucleosome [GO:0000788]; replication fork protection complex [GO:0031298]; DNA binding [GO:0003677]; protein heterodimerization activity [GO:0046982]; chromatin assembly or disassembly [GO:0006333]	nuclear nucleosome [GO:0000788]; replication fork protection complex [GO:0031298]; DNA binding [GO:0003677]; protein heterodimerization activity [GO:0046982]; chromatin assembly or disassembly [GO:0006333]	nuclear nucleosome [GO:0000788]; replication fork protection complex [GO:0031298]; DNA binding [GO:0003677]; protein heterodimerization activity [GO:0046982]; chromatin assembly or disassembly [GO:0006333]	nuclear nucleosome [GO:0000788]; replication fork protection complex [GO:0031298]; DNA binding [GO:0003677]; protein heterodimerization activity [GO:0046982]; chromatin assembly or disassembly [GO:0006333]
THI4_YEAST	2.19672	0.889397	P32318	Thiamine thiazole synthase (Thiazole biosynthetic enzyme)	THI4 ESP35 MOL1 YGR144W G6620	cytosol [GO:0005829]; mitochondrion [GO:0005739]; nucleus [GO:0005634]; thylakoid [GO:0009579]; ferrous iron binding [GO:0008198]; identical protein binding [GO:0042802]; oxidoreductase activity [GO:0016491]; protein domain specific binding [GO:0019904]; protein homodimerization activity [GO:0042803]; zinc ion binding [GO:0008270]; cellular response to DNA damage stimulus [GO:0006974]; mitochondr…	cytosol [GO:0005829]; mitochondrion [GO:0005739]; nucleus [GO:0005634]; thylakoid [GO:0009579]; ferrous iron binding [GO:0008198]; identical protein binding [GO:0042802]; oxidoreductase activity [GO:0016491]; protein domain specific binding [GO:0019904]; protein homodimerization activity [GO:0042803]; zinc ion binding [GO:0008270]; cellular response to DNA damage stimulus [GO:0006974]; mitochondr…	cytosol [GO:0005829]; mitochondrion [GO:0005739]; nucleus [GO:0005634]; thylakoid [GO:0009579]; ferrous iron binding [GO:0008198]; identical protein binding [GO:0042802]; oxidoreductase activity [GO:0016491]; protein domain specific binding [GO:0019904]; protein homodimerization activity [GO:0042803]; zinc ion binding [GO:0008270]; cellular response to DNA damage stimulus [GO:0006974]; mitochondr…	cytosol [GO:0005829]; mitochondrion [GO:0005739]; nucleus [GO:0005634]; thylakoid [GO:0009579]; ferrous iron binding [GO:0008198]; identical protein binding [GO:0042802]; oxidoreductase activity [GO:0016491]; protein domain specific binding [GO:0019904]; protein homodimerization activity [GO:0042803]; zinc ion binding [GO:0008270]; cellular response to DNA damage stimulus [GO:0006974]; mitochondr…
AB140_YEAST	2.92716	0.887403	Q08641	tRNA(Thr) (cytosine(32)-N(3))-methyltransferase (EC 2.1.1.268) (Actin-binding protein of 140 kDa) (tRNA methyltransferase of 140 kDa)	ABP140 TRM140 YOR239W YOR240W	actin cortical patch [GO:0030479]; actin filament [GO:0005884]; actin filament bundle [GO:0032432]; actin filament binding [GO:0051015]; protein binding, bridging [GO:0030674]; tRNA (cytosine-3-)-methyltransferase activity [GO:0052735]; actin filament bundle assembly [GO:0051017]; tRNA methylation [GO:0030488]	actin cortical patch [GO:0030479]; actin filament [GO:0005884]; actin filament bundle [GO:0032432]; actin filament binding [GO:0051015]; protein binding, bridging [GO:0030674]; tRNA (cytosine-3-)-methyltransferase activity [GO:0052735]; actin filament bundle assembly [GO:0051017]; tRNA methylation [GO:0030488]	actin cortical patch [GO:0030479]; actin filament [GO:0005884]; actin filament bundle [GO:0032432]; actin filament binding [GO:0051015]; protein binding, bridging [GO:0030674]; tRNA (cytosine-3-)-methyltransferase activity [GO:0052735]; actin filament bundle assembly [GO:0051017]; tRNA methylation [GO:0030488]	actin cortical patch [GO:0030479]; actin filament [GO:0005884]; actin filament bundle [GO:0032432]; actin filament binding [GO:0051015]; protein binding, bridging [GO:0030674]; tRNA (cytosine-3-)-methyltransferase activity [GO:0052735]; actin filament bundle assembly [GO:0051017]; tRNA methylation [GO:0030488]
COQ5_YEAST	1.82235	0.886357	P49017	2-methoxy-6-polyprenyl-1,4-benzoquinol methylase, mitochondrial (EC 2.1.1.201) (2-hexaprenyl-6-methoxy-1,4-benzoquinol methyltransferase) (Ubiquinone biosynthesis methyltransferase COQ5)	COQ5 DBI56 YML110C YM8339.09C	mitochondrial inner membrane [GO:0005743]; mitochondrial matrix [GO:0005759]; 2-hexaprenyl-6-methoxy-1,4-benzoquinone methyltransferase activity [GO:0043334]; 2-octaprenyl-6-methoxy-1,4-benzoquinone methylase activity [GO:0102005]; aerobic respiration [GO:0009060]; ubiquinone biosynthetic process [GO:0006744]	mitochondrial inner membrane [GO:0005743]; mitochondrial matrix [GO:0005759]; 2-hexaprenyl-6-methoxy-1,4-benzoquinone methyltransferase activity [GO:0043334]; 2-octaprenyl-6-methoxy-1,4-benzoquinone methylase activity [GO:0102005]; aerobic respiration [GO:0009060]; ubiquinone biosynthetic process [GO:0006744]	mitochondrial inner membrane [GO:0005743]; mitochondrial matrix [GO:0005759]; 2-hexaprenyl-6-methoxy-1,4-benzoquinone methyltransferase activity [GO:0043334]; 2-octaprenyl-6-methoxy-1,4-benzoquinone methylase activity [GO:0102005]; aerobic respiration [GO:0009060]; ubiquinone biosynthetic process [GO:0006744]	mitochondrial inner membrane [GO:0005743]; mitochondrial matrix [GO:0005759]; 2-hexaprenyl-6-methoxy-1,4-benzoquinone methyltransferase activity [GO:0043334]; 2-octaprenyl-6-methoxy-1,4-benzoquinone methylase activity [GO:0102005]; aerobic respiration [GO:0009060]; ubiquinone biosynthetic process [GO:0006744]
NOC2_YEAST	1.99126	0.885795	P39744	Nucleolar complex protein 2	NOC2 YOR206W YOX001	Noc1p-Noc2p complex [GO:0030690]; Noc2p-Noc3p complex [GO:0030691]; nucleolus [GO:0005730]; nucleoplasm [GO:0005654]; nucleus [GO:0005634]; preribosome, large subunit precursor [GO:0030687]; ribosomal large subunit biogenesis [GO:0042273]	Noc1p-Noc2p complex [GO:0030690]; Noc2p-Noc3p complex [GO:0030691]; nucleolus [GO:0005730]; nucleoplasm [GO:0005654]; nucleus [GO:0005634]; preribosome, large subunit precursor [GO:0030687]; ribosomal large subunit biogenesis [GO:0042273]	Noc1p-Noc2p complex [GO:0030690]; Noc2p-Noc3p complex [GO:0030691]; nucleolus [GO:0005730]; nucleoplasm [GO:0005654]; nucleus [GO:0005634]; preribosome, large subunit precursor [GO:0030687]; ribosomal large subunit biogenesis [GO:0042273]	Noc1p-Noc2p complex [GO:0030690]; Noc2p-Noc3p complex [GO:0030691]; nucleolus [GO:0005730]; nucleoplasm [GO:0005654]; nucleus [GO:0005634]; preribosome, large subunit precursor [GO:0030687]; ribosomal large subunit biogenesis [GO:0042273]
RL16A_YEAST	2.59653	0.88449	P26784	60S ribosomal protein L16-A (L13a) (L21) (Large ribosomal subunit protein uL13-A) (RP22) (YL15)	RPL16A RPL13 RPL21A YIL133C	cytosolic large ribosomal subunit [GO:0022625]; mRNA binding [GO:0003729]; RNA binding [GO:0003723]; structural constituent of ribosome [GO:0003735]; cytoplasmic translation [GO:0002181]; translation [GO:0006412]	cytosolic large ribosomal subunit [GO:0022625]; mRNA binding [GO:0003729]; RNA binding [GO:0003723]; structural constituent of ribosome [GO:0003735]; cytoplasmic translation [GO:0002181]; translation [GO:0006412]	cytosolic large ribosomal subunit [GO:0022625]; mRNA binding [GO:0003729]; RNA binding [GO:0003723]; structural constituent of ribosome [GO:0003735]; cytoplasmic translation [GO:0002181]; translation [GO:0006412]	cytosolic large ribosomal subunit [GO:0022625]; mRNA binding [GO:0003729]; RNA binding [GO:0003723]; structural constituent of ribosome [GO:0003735]; cytoplasmic translation [GO:0002181]; translation [GO:0006412]
PP2B2_YEAST	2.61973	0.876374	P14747	Serine/threonine-protein phosphatase 2B catalytic subunit A2 (EC 3.1.3.16) (Calcineurin A2) (Calmodulin-binding protein 2)	CMP2 CNA2 YML057W YM9958.05	calcineurin complex [GO:0005955]; calmodulin binding [GO:0005516]; metal ion binding [GO:0046872]; phosphoprotein phosphatase activity [GO:0004721]; adaptation of signaling pathway by response to pheromone involved in conjugation with cellular fusion [GO:0000754]; cellular ion homeostasis [GO:0006873]	calcineurin complex [GO:0005955]; calmodulin binding [GO:0005516]; metal ion binding [GO:0046872]; phosphoprotein phosphatase activity [GO:0004721]; adaptation of signaling pathway by response to pheromone involved in conjugation with cellular fusion [GO:0000754]; cellular ion homeostasis [GO:0006873]	calcineurin complex [GO:0005955]; calmodulin binding [GO:0005516]; metal ion binding [GO:0046872]; phosphoprotein phosphatase activity [GO:0004721]; adaptation of signaling pathway by response to pheromone involved in conjugation with cellular fusion [GO:0000754]; cellular ion homeostasis [GO:0006873]	calcineurin complex [GO:0005955]; calmodulin binding [GO:0005516]; metal ion binding [GO:0046872]; phosphoprotein phosphatase activity [GO:0004721]; adaptation of signaling pathway by response to pheromone involved in conjugation with cellular fusion [GO:0000754]; cellular ion homeostasis [GO:0006873]
YPK2_YEAST	1.31909	0.871276	P18961	Serine/threonine-protein kinase YPK2/YKR2 (EC 2.7.11.1)	YPK2 YKR2 YMR104C YM9718.03C	cytoplasm [GO:0005737]; nucleus [GO:0005634]; ATP binding [GO:0005524]; protein kinase activity [GO:0004672]; protein serine/threonine kinase activity [GO:0004674]; cell wall organization [GO:0071555]; eisosome assembly [GO:0070941]; intracellular signal transduction [GO:0035556]; peptidyl-serine phosphorylation [GO:0018105]; regulation of cell shape [GO:0008360]	cytoplasm [GO:0005737]; nucleus [GO:0005634]; ATP binding [GO:0005524]; protein kinase activity [GO:0004672]; protein serine/threonine kinase activity [GO:0004674]; cell wall organization [GO:0071555]; eisosome assembly [GO:0070941]; intracellular signal transduction [GO:0035556]; peptidyl-serine phosphorylation [GO:0018105]; regulation of cell shape [GO:0008360]	cytoplasm [GO:0005737]; nucleus [GO:0005634]; ATP binding [GO:0005524]; protein kinase activity [GO:0004672]; protein serine/threonine kinase activity [GO:0004674]; cell wall organization [GO:0071555]; eisosome assembly [GO:0070941]; intracellular signal transduction [GO:0035556]; peptidyl-serine phosphorylation [GO:0018105]; regulation of cell shape [GO:0008360]	cytoplasm [GO:0005737]; nucleus [GO:0005634]; ATP binding [GO:0005524]; protein kinase activity [GO:0004672]; protein serine/threonine kinase activity [GO:0004674]; cell wall organization [GO:0071555]; eisosome assembly [GO:0070941]; intracellular signal transduction [GO:0035556]; peptidyl-serine phosphorylation [GO:0018105]; regulation of cell shape [GO:0008360]
COPD_YEAST	2.64432	0.868946	P43621	Coatomer subunit delta (Delta-coat protein) (Delta-COP)	RET2 YFR051C	COPI vesicle coat [GO:0030126]; Golgi membrane [GO:0000139]; ER to Golgi vesicle-mediated transport [GO:0006888]; Golgi inheritance [GO:0048313]; Golgi localization [GO:0051645]; protein transport [GO:0015031]; retrograde vesicle-mediated transport, Golgi to ER [GO:0006890]	COPI vesicle coat [GO:0030126]; Golgi membrane [GO:0000139]; ER to Golgi vesicle-mediated transport [GO:0006888]; Golgi inheritance [GO:0048313]; Golgi localization [GO:0051645]; protein transport [GO:0015031]; retrograde vesicle-mediated transport, Golgi to ER [GO:0006890]	COPI vesicle coat [GO:0030126]; Golgi membrane [GO:0000139]; ER to Golgi vesicle-mediated transport [GO:0006888]; Golgi inheritance [GO:0048313]; Golgi localization [GO:0051645]; protein transport [GO:0015031]; retrograde vesicle-mediated transport, Golgi to ER [GO:0006890]	COPI vesicle coat [GO:0030126]; Golgi membrane [GO:0000139]; ER to Golgi vesicle-mediated transport [GO:0006888]; Golgi inheritance [GO:0048313]; Golgi localization [GO:0051645]; protein transport [GO:0015031]; retrograde vesicle-mediated transport, Golgi to ER [GO:0006890]
KAPB_YEAST	1.32363	0.839032	P06245	cAMP-dependent protein kinase type 2 (PKA 2) (EC 2.7.11.11)	TPK2 PKA2 YKR1 YPL203W	cAMP-dependent protein kinase complex [GO:0005952]; cytosol [GO:0005829]; nuclear chromatin [GO:0000790]; nucleus [GO:0005634]; ATP binding [GO:0005524]; cAMP-dependent protein kinase activity [GO:0004691]; invasive growth in response to glucose limitation [GO:0001403]; protein kinase A signaling [GO:0010737]; protein phosphorylation [GO:0006468]; Ras protein signal transduction [GO:0007265]	cAMP-dependent protein kinase complex [GO:0005952]; cytosol [GO:0005829]; nuclear chromatin [GO:0000790]; nucleus [GO:0005634]; ATP binding [GO:0005524]; cAMP-dependent protein kinase activity [GO:0004691]; invasive growth in response to glucose limitation [GO:0001403]; protein kinase A signaling [GO:0010737]; protein phosphorylation [GO:0006468]; Ras protein signal transduction [GO:0007265]	cAMP-dependent protein kinase complex [GO:0005952]; cytosol [GO:0005829]; nuclear chromatin [GO:0000790]; nucleus [GO:0005634]; ATP binding [GO:0005524]; cAMP-dependent protein kinase activity [GO:0004691]; invasive growth in response to glucose limitation [GO:0001403]; protein kinase A signaling [GO:0010737]; protein phosphorylation [GO:0006468]; Ras protein signal transduction [GO:0007265]	cAMP-dependent protein kinase complex [GO:0005952]; cytosol [GO:0005829]; nuclear chromatin [GO:0000790]; nucleus [GO:0005634]; ATP binding [GO:0005524]; cAMP-dependent protein kinase activity [GO:0004691]; invasive growth in response to glucose limitation [GO:0001403]; protein kinase A signaling [GO:0010737]; protein phosphorylation [GO:0006468]; Ras protein signal transduction [GO:0007265]
NCB2_YEAST	1.45621	0.83749	Q92317	Negative cofactor 2 complex subunit beta (NC2 complex subunit beta) (Transcriptional repressor YDR1)	NCB2 YDR1 YDR397C	negative cofactor 2 complex [GO:0017054]; nucleus [GO:0005634]; chromatin binding [GO:0003682]; core promoter binding [GO:0001047]; protein heterodimerization activity [GO:0046982]; RNA polymerase II transcription factor activity, TBP-class protein binding, involved in preinitiation complex assembly [GO:0001129]; transcription corepressor activity [GO:0003714]; negative regulation of transcriptio…	negative cofactor 2 complex [GO:0017054]; nucleus [GO:0005634]; chromatin binding [GO:0003682]; core promoter binding [GO:0001047]; protein heterodimerization activity [GO:0046982]; RNA polymerase II transcription factor activity, TBP-class protein binding, involved in preinitiation complex assembly [GO:0001129]; transcription corepressor activity [GO:0003714]; negative regulation of transcriptio…	negative cofactor 2 complex [GO:0017054]; nucleus [GO:0005634]; chromatin binding [GO:0003682]; core promoter binding [GO:0001047]; protein heterodimerization activity [GO:0046982]; RNA polymerase II transcription factor activity, TBP-class protein binding, involved in preinitiation complex assembly [GO:0001129]; transcription corepressor activity [GO:0003714]; negative regulation of transcriptio…	negative cofactor 2 complex [GO:0017054]; nucleus [GO:0005634]; chromatin binding [GO:0003682]; core promoter binding [GO:0001047]; protein heterodimerization activity [GO:0046982]; RNA polymerase II transcription factor activity, TBP-class protein binding, involved in preinitiation complex assembly [GO:0001129]; transcription corepressor activity [GO:0003714]; negative regulation of transcriptio…
CIS3_YEAST	1.50029	0.834363	P47001	Cell wall mannoprotein CIS3 (Covalently-linked cell wall protein 5/11) (Protein with internal repeats 4) (Soluble cell wall protein 8)	CIS3 CCW11 CCW5 PIR4 SCW8 YJL158C J0561	cellular bud tip [GO:0005934]; extracellular region [GO:0005576]; fungal-type cell wall [GO:0009277]; structural constituent of cell wall [GO:0005199]; fungal-type cell wall organization [GO:0031505]	cellular bud tip [GO:0005934]; extracellular region [GO:0005576]; fungal-type cell wall [GO:0009277]; structural constituent of cell wall [GO:0005199]; fungal-type cell wall organization [GO:0031505]	cellular bud tip [GO:0005934]; extracellular region [GO:0005576]; fungal-type cell wall [GO:0009277]; structural constituent of cell wall [GO:0005199]; fungal-type cell wall organization [GO:0031505]	cellular bud tip [GO:0005934]; extracellular region [GO:0005576]; fungal-type cell wall [GO:0009277]; structural constituent of cell wall [GO:0005199]; fungal-type cell wall organization [GO:0031505]
RS2_YEAST	1.94458	0.817176	P25443	40S ribosomal protein S2 (Omnipotent suppressor protein SUP44) (RP12) (S4) (Small ribosomal subunit protein uS5) (YS5)	RPS2 RPS4 SUP38 SUP44 YGL123W G2893	cytosolic small ribosomal subunit [GO:0022627]; nucleolus [GO:0005730]; nucleoplasm [GO:0005654]; small-subunit processome [GO:0032040]; small ribosomal subunit rRNA binding [GO:0070181]; structural constituent of ribosome [GO:0003735]; positive regulation of translational fidelity [GO:0045903]; rRNA export from nucleus [GO:0006407]; rRNA methylation [GO:0031167]; translation [GO:0006412]	cytosolic small ribosomal subunit [GO:0022627]; nucleolus [GO:0005730]; nucleoplasm [GO:0005654]; small-subunit processome [GO:0032040]; small ribosomal subunit rRNA binding [GO:0070181]; structural constituent of ribosome [GO:0003735]; positive regulation of translational fidelity [GO:0045903]; rRNA export from nucleus [GO:0006407]; rRNA methylation [GO:0031167]; translation [GO:0006412]	cytosolic small ribosomal subunit [GO:0022627]; nucleolus [GO:0005730]; nucleoplasm [GO:0005654]; small-subunit processome [GO:0032040]; small ribosomal subunit rRNA binding [GO:0070181]; structural constituent of ribosome [GO:0003735]; positive regulation of translational fidelity [GO:0045903]; rRNA export from nucleus [GO:0006407]; rRNA methylation [GO:0031167]; translation [GO:0006412]	cytosolic small ribosomal subunit [GO:0022627]; nucleolus [GO:0005730]; nucleoplasm [GO:0005654]; small-subunit processome [GO:0032040]; small ribosomal subunit rRNA binding [GO:0070181]; structural constituent of ribosome [GO:0003735]; positive regulation of translational fidelity [GO:0045903]; rRNA export from nucleus [GO:0006407]; rRNA methylation [GO:0031167]; translation [GO:0006412]
RPAB4_YEAST	1.94677	0.815416	P40422	DNA-directed RNA polymerases I, II, and III subunit RPABC4 (RNA polymerases I, II, and III subunit ABC4) (ABC10-alpha)	RPC10 RPB12 YHR143W-A YHR143BW	DNA-directed RNA polymerase I complex [GO:0005736]; DNA-directed RNA polymerase II, core complex [GO:0005665]; DNA-directed RNA polymerase III complex [GO:0005666]; nucleoplasm [GO:0005654]; DNA binding [GO:0003677]; RNA polymerase I activity [GO:0001054]; zinc ion binding [GO:0008270]; ribosome biogenesis [GO:0042254]; termination of RNA polymerase III transcription [GO:0006386]; transcription e…	DNA-directed RNA polymerase I complex [GO:0005736]; DNA-directed RNA polymerase II, core complex [GO:0005665]; DNA-directed RNA polymerase III complex [GO:0005666]; nucleoplasm [GO:0005654]; DNA binding [GO:0003677]; RNA polymerase I activity [GO:0001054]; zinc ion binding [GO:0008270]; ribosome biogenesis [GO:0042254]; termination of RNA polymerase III transcription [GO:0006386]; transcription e…	DNA-directed RNA polymerase I complex [GO:0005736]; DNA-directed RNA polymerase II, core complex [GO:0005665]; DNA-directed RNA polymerase III complex [GO:0005666]; nucleoplasm [GO:0005654]; DNA binding [GO:0003677]; RNA polymerase I activity [GO:0001054]; zinc ion binding [GO:0008270]; ribosome biogenesis [GO:0042254]; termination of RNA polymerase III transcription [GO:0006386]; transcription e…	DNA-directed RNA polymerase I complex [GO:0005736]; DNA-directed RNA polymerase II, core complex [GO:0005665]; DNA-directed RNA polymerase III complex [GO:0005666]; nucleoplasm [GO:0005654]; DNA binding [GO:0003677]; RNA polymerase I activity [GO:0001054]; zinc ion binding [GO:0008270]; ribosome biogenesis [GO:0042254]; termination of RNA polymerase III transcription [GO:0006386]; transcription e…
HS150_YEAST	1.67582	0.802559	P32478	Cell wall mannoprotein HSP150 (150 kDa heat shock glycoprotein) (Covalently-linked cell wall protein 7) (Protein with internal repeats 2)	HSP150 CCW7 ORE1 PIR2 YJL159W J0558	cellular bud scar [GO:0005621]; extracellular region [GO:0005576]; fungal-type cell wall [GO:0009277]; ATPase activity [GO:0016887]; structural constituent of cell wall [GO:0005199]; fungal-type cell wall organization [GO:0031505]	cellular bud scar [GO:0005621]; extracellular region [GO:0005576]; fungal-type cell wall [GO:0009277]; ATPase activity [GO:0016887]; structural constituent of cell wall [GO:0005199]; fungal-type cell wall organization [GO:0031505]	cellular bud scar [GO:0005621]; extracellular region [GO:0005576]; fungal-type cell wall [GO:0009277]; ATPase activity [GO:0016887]; structural constituent of cell wall [GO:0005199]; fungal-type cell wall organization [GO:0031505]	cellular bud scar [GO:0005621]; extracellular region [GO:0005576]; fungal-type cell wall [GO:0009277]; ATPase activity [GO:0016887]; structural constituent of cell wall [GO:0005199]; fungal-type cell wall organization [GO:0031505]
RPAB2_YEAST	1.7143	0.794531	P20435	DNA-directed RNA polymerases I, II, and III subunit RPABC2 (RNA polymerases I, II, and III subunit ABC2) (ABC23) (DNA-directed RNA polymerases I, II, and III 23 kDa polypeptide)	RPO26 RPB6 YPR187W P9677.8	cytoplasm [GO:0005737]; DNA-directed RNA polymerase I complex [GO:0005736]; DNA-directed RNA polymerase II, core complex [GO:0005665]; DNA-directed RNA polymerase III complex [GO:0005666]; nucleoplasm [GO:0005654]; DNA binding [GO:0003677]; RNA polymerase I activity [GO:0001054]; ribosome biogenesis [GO:0042254]; termination of RNA polymerase III transcription [GO:0006386]; transcription elongati…	cytoplasm [GO:0005737]; DNA-directed RNA polymerase I complex [GO:0005736]; DNA-directed RNA polymerase II, core complex [GO:0005665]; DNA-directed RNA polymerase III complex [GO:0005666]; nucleoplasm [GO:0005654]; DNA binding [GO:0003677]; RNA polymerase I activity [GO:0001054]; ribosome biogenesis [GO:0042254]; termination of RNA polymerase III transcription [GO:0006386]; transcription elongati…	cytoplasm [GO:0005737]; DNA-directed RNA polymerase I complex [GO:0005736]; DNA-directed RNA polymerase II, core complex [GO:0005665]; DNA-directed RNA polymerase III complex [GO:0005666]; nucleoplasm [GO:0005654]; DNA binding [GO:0003677]; RNA polymerase I activity [GO:0001054]; ribosome biogenesis [GO:0042254]; termination of RNA polymerase III transcription [GO:0006386]; transcription elongati…	cytoplasm [GO:0005737]; DNA-directed RNA polymerase I complex [GO:0005736]; DNA-directed RNA polymerase II, core complex [GO:0005665]; DNA-directed RNA polymerase III complex [GO:0005666]; nucleoplasm [GO:0005654]; DNA binding [GO:0003677]; RNA polymerase I activity [GO:0001054]; ribosome biogenesis [GO:0042254]; termination of RNA polymerase III transcription [GO:0006386]; transcription elongati…
SEC11_YEAST	1.60278	0.772244	P15367	Signal peptidase complex catalytic subunit SEC11 (EC 3.4.21.89) (Secretory protein 11) (Signal peptidase I)	SEC11 YIR022W	endoplasmic reticulum [GO:0005783]; integral component of membrane [GO:0016021]; signal peptidase complex [GO:0005787]; peptidase activity [GO:0008233]; serine-type peptidase activity [GO:0008236]; protein targeting to ER [GO:0045047]; signal peptide processing [GO:0006465]	endoplasmic reticulum [GO:0005783]; integral component of membrane [GO:0016021]; signal peptidase complex [GO:0005787]; peptidase activity [GO:0008233]; serine-type peptidase activity [GO:0008236]; protein targeting to ER [GO:0045047]; signal peptide processing [GO:0006465]	endoplasmic reticulum [GO:0005783]; integral component of membrane [GO:0016021]; signal peptidase complex [GO:0005787]; peptidase activity [GO:0008233]; serine-type peptidase activity [GO:0008236]; protein targeting to ER [GO:0045047]; signal peptide processing [GO:0006465]	endoplasmic reticulum [GO:0005783]; integral component of membrane [GO:0016021]; signal peptidase complex [GO:0005787]; peptidase activity [GO:0008233]; serine-type peptidase activity [GO:0008236]; protein targeting to ER [GO:0045047]; signal peptide processing [GO:0006465]
PPX1_YEAST	1.44515	0.762731	P38698	Exopolyphosphatase (ExopolyPase) (EC 3.6.1.11) (Metaphosphatase)	PPX1 YHR201C	cytoplasm [GO:0005737]; cytosol [GO:0005829]; mitochondrial matrix [GO:0005759]; plasma membrane [GO:0005886]; exopolyphosphatase activity [GO:0004309]; metal ion binding [GO:0046872]; polyphosphate catabolic process [GO:0006798]	cytoplasm [GO:0005737]; cytosol [GO:0005829]; mitochondrial matrix [GO:0005759]; plasma membrane [GO:0005886]; exopolyphosphatase activity [GO:0004309]; metal ion binding [GO:0046872]; polyphosphate catabolic process [GO:0006798]	cytoplasm [GO:0005737]; cytosol [GO:0005829]; mitochondrial matrix [GO:0005759]; plasma membrane [GO:0005886]; exopolyphosphatase activity [GO:0004309]; metal ion binding [GO:0046872]; polyphosphate catabolic process [GO:0006798]	cytoplasm [GO:0005737]; cytosol [GO:0005829]; mitochondrial matrix [GO:0005759]; plasma membrane [GO:0005886]; exopolyphosphatase activity [GO:0004309]; metal ion binding [GO:0046872]; polyphosphate catabolic process [GO:0006798]
YJR1_YEAST	1.55789	0.761076	P46992	Cell wall protein YJL171C	YJL171C J0512	anchored component of membrane [GO:0031225]; cell surface [GO:0009986]; extracellular region [GO:0005576]; fungal-type cell wall [GO:0009277]; plasma membrane [GO:0005886]	anchored component of membrane [GO:0031225]; cell surface [GO:0009986]; extracellular region [GO:0005576]; fungal-type cell wall [GO:0009277]; plasma membrane [GO:0005886]	anchored component of membrane [GO:0031225]; cell surface [GO:0009986]; extracellular region [GO:0005576]; fungal-type cell wall [GO:0009277]; plasma membrane [GO:0005886]	anchored component of membrane [GO:0031225]; cell surface [GO:0009986]; extracellular region [GO:0005576]; fungal-type cell wall [GO:0009277]; plasma membrane [GO:0005886]
CDC42_YEAST	2.04251	0.759182	P19073	Cell division control protein 42 (Suppressor of RHO3 protein 2)	CDC42 SRO2 YLR229C L8083.13	cellular bud neck [GO:0005935]; cellular bud tip [GO:0005934]; fungal-type vacuole membrane [GO:0000329]; incipient cellular bud site [GO:0000131]; mating projection tip [GO:0043332]; nuclear membrane [GO:0031965]; plasma membrane [GO:0005886]; septin ring [GO:0005940]; GTP binding [GO:0005525]; GTPase activity [GO:0003924]; budding cell apical bud growth [GO:0007118]; budding cell isotropic bud …	cellular bud neck [GO:0005935]; cellular bud tip [GO:0005934]; fungal-type vacuole membrane [GO:0000329]; incipient cellular bud site [GO:0000131]; mating projection tip [GO:0043332]; nuclear membrane [GO:0031965]; plasma membrane [GO:0005886]; septin ring [GO:0005940]; GTP binding [GO:0005525]; GTPase activity [GO:0003924]; budding cell apical bud growth [GO:0007118]; budding cell isotropic bud …	cellular bud neck [GO:0005935]; cellular bud tip [GO:0005934]; fungal-type vacuole membrane [GO:0000329]; incipient cellular bud site [GO:0000131]; mating projection tip [GO:0043332]; nuclear membrane [GO:0031965]; plasma membrane [GO:0005886]; septin ring [GO:0005940]; GTP binding [GO:0005525]; GTPase activity [GO:0003924]; budding cell apical bud growth [GO:0007118]; budding cell isotropic bud …	cellular bud neck [GO:0005935]; cellular bud tip [GO:0005934]; fungal-type vacuole membrane [GO:0000329]; incipient cellular bud site [GO:0000131]; mating projection tip [GO:0043332]; nuclear membrane [GO:0031965]; plasma membrane [GO:0005886]; septin ring [GO:0005940]; GTP binding [GO:0005525]; GTPase activity [GO:0003924]; budding cell apical bud growth [GO:0007118]; budding cell isotropic bud …
SRO9_YEAST	2.84111	0.74604	P25567	RNA-binding protein SRO9 (Suppressor of RHO3 protein 9)	SRO9 YCL037C YCL37C	cytoplasmic stress granule [GO:0010494]; polysome [GO:0005844]; RNA binding [GO:0003723]; cytoplasmic translation [GO:0002181]	cytoplasmic stress granule [GO:0010494]; polysome [GO:0005844]; RNA binding [GO:0003723]; cytoplasmic translation [GO:0002181]	cytoplasmic stress granule [GO:0010494]; polysome [GO:0005844]; RNA binding [GO:0003723]; cytoplasmic translation [GO:0002181]	cytoplasmic stress granule [GO:0010494]; polysome [GO:0005844]; RNA binding [GO:0003723]; cytoplasmic translation [GO:0002181]
NAT1_YEAST	1.42998	0.730331	P12945	N-terminal acetyltransferase A complex subunit NAT1 (NatA complex subunit NAT1) (Amino-terminal, alpha-amino, acetyltransferase 1)	NAT1 AAA1 YDL040C D2720	NatA complex [GO:0031415]; N-terminal peptidyl-methionine acetylation [GO:0017196]; N-terminal protein amino acid acetylation [GO:0006474]	NatA complex [GO:0031415]; N-terminal peptidyl-methionine acetylation [GO:0017196]; N-terminal protein amino acid acetylation [GO:0006474]	NatA complex [GO:0031415]; N-terminal peptidyl-methionine acetylation [GO:0017196]; N-terminal protein amino acid acetylation [GO:0006474]	NatA complex [GO:0031415]; N-terminal peptidyl-methionine acetylation [GO:0017196]; N-terminal protein amino acid acetylation [GO:0006474]
MIC26_YEAST	2.90528	0.730197	P50087	MICOS subunit MIC26 (Mitochondrial contact site complex 29 kDa subunit) (Mitochondrial inner membrane organization component of 27 kDa) (Mitochondrial organizing structure protein 2) (MitOS2)	MIC26 MCS29 MIO27 MOS2 YGR235C G8575	MICOS complex [GO:0061617]; mitochondrial crista junction [GO:0044284]; cristae formation [GO:0042407]	MICOS complex [GO:0061617]; mitochondrial crista junction [GO:0044284]; cristae formation [GO:0042407]	MICOS complex [GO:0061617]; mitochondrial crista junction [GO:0044284]; cristae formation [GO:0042407]	MICOS complex [GO:0061617]; mitochondrial crista junction [GO:0044284]; cristae formation [GO:0042407]
TPA1_YEAST	2.80293	0.721488	P40032	Prolyl 3,4-dihydroxylase TPA1 (EC 1.14.11.-) (Termination and polyadenylation protein 1)	TPA1 YER049W	cytoplasm [GO:0005737]; nucleus [GO:0005634]; ferrous iron binding [GO:0008198]; L-ascorbic acid binding [GO:0031418]; oxidative DNA demethylase activity [GO:0035516]; peptidyl-proline dioxygenase activity [GO:0031543]; poly(A) binding [GO:0008143]; DNA dealkylation involved in DNA repair [GO:0006307]; nuclear-transcribed mRNA catabolic process, deadenylation-dependent decay [GO:0000288]; oxidati…	cytoplasm [GO:0005737]; nucleus [GO:0005634]; ferrous iron binding [GO:0008198]; L-ascorbic acid binding [GO:0031418]; oxidative DNA demethylase activity [GO:0035516]; peptidyl-proline dioxygenase activity [GO:0031543]; poly(A) binding [GO:0008143]; DNA dealkylation involved in DNA repair [GO:0006307]; nuclear-transcribed mRNA catabolic process, deadenylation-dependent decay [GO:0000288]; oxidati…	cytoplasm [GO:0005737]; nucleus [GO:0005634]; ferrous iron binding [GO:0008198]; L-ascorbic acid binding [GO:0031418]; oxidative DNA demethylase activity [GO:0035516]; peptidyl-proline dioxygenase activity [GO:0031543]; poly(A) binding [GO:0008143]; DNA dealkylation involved in DNA repair [GO:0006307]; nuclear-transcribed mRNA catabolic process, deadenylation-dependent decay [GO:0000288]; oxidati…	cytoplasm [GO:0005737]; nucleus [GO:0005634]; ferrous iron binding [GO:0008198]; L-ascorbic acid binding [GO:0031418]; oxidative DNA demethylase activity [GO:0035516]; peptidyl-proline dioxygenase activity [GO:0031543]; poly(A) binding [GO:0008143]; DNA dealkylation involved in DNA repair [GO:0006307]; nuclear-transcribed mRNA catabolic process, deadenylation-dependent decay [GO:0000288]; oxidati…
MVD1_YEAST	2.1531	0.716094	P32377	Diphosphomevalonate decarboxylase (EC 4.1.1.33) (Ergosterol biosynthesis protein 19) (Mevalonate pyrophosphate decarboxylase) (Mevalonate-5-diphosphate decarboxylase) (MDD) (MDDase)	MVD1 ERG19 MPD YNR043W N3427	cytosol [GO:0005829]; ATP binding [GO:0005524]; diphosphomevalonate decarboxylase activity [GO:0004163]; isopentenyl diphosphate biosynthetic process, mevalonate pathway [GO:0019287]; sterol biosynthetic process [GO:0016126]	cytosol [GO:0005829]; ATP binding [GO:0005524]; diphosphomevalonate decarboxylase activity [GO:0004163]; isopentenyl diphosphate biosynthetic process, mevalonate pathway [GO:0019287]; sterol biosynthetic process [GO:0016126]	cytosol [GO:0005829]; ATP binding [GO:0005524]; diphosphomevalonate decarboxylase activity [GO:0004163]; isopentenyl diphosphate biosynthetic process, mevalonate pathway [GO:0019287]; sterol biosynthetic process [GO:0016126]	cytosol [GO:0005829]; ATP binding [GO:0005524]; diphosphomevalonate decarboxylase activity [GO:0004163]; isopentenyl diphosphate biosynthetic process, mevalonate pathway [GO:0019287]; sterol biosynthetic process [GO:0016126]
YBU6_YEAST	1.67602	0.707727	P38256	Uncharacterized protein YBR096W	YBR096W YBR0824
AGX1_YEAST	2.92165	0.697902	P43567	Alanine--glyoxylate aminotransferase 1 (EC 2.6.1.44)	AGX1 YFL030W	peroxisome [GO:0005777]; alanine-glyoxylate transaminase activity [GO:0008453]; serine-pyruvate transaminase activity [GO:0004760]; glycine biosynthetic process, by transamination of glyoxylate [GO:0019265]	peroxisome [GO:0005777]; alanine-glyoxylate transaminase activity [GO:0008453]; serine-pyruvate transaminase activity [GO:0004760]; glycine biosynthetic process, by transamination of glyoxylate [GO:0019265]	peroxisome [GO:0005777]; alanine-glyoxylate transaminase activity [GO:0008453]; serine-pyruvate transaminase activity [GO:0004760]; glycine biosynthetic process, by transamination of glyoxylate [GO:0019265]	peroxisome [GO:0005777]; alanine-glyoxylate transaminase activity [GO:0008453]; serine-pyruvate transaminase activity [GO:0004760]; glycine biosynthetic process, by transamination of glyoxylate [GO:0019265]
NUP85_YEAST	1.4738	0.694478	P46673	Nucleoporin NUP85 (Nuclear pore protein NUP85)	NUP85 RAT9 YJR042W J1624	nuclear membrane [GO:0031965]; nuclear pore [GO:0005643]; nuclear pore outer ring [GO:0031080]; structural constituent of nuclear pore [GO:0017056]; mRNA export from nucleus [GO:0006406]; nuclear pore distribution [GO:0031081]; positive regulation of transcription, DNA-templated [GO:0045893]; protein import into nucleus [GO:0006606]; ribosomal large subunit export from nucleus [GO:0000055]	nuclear membrane [GO:0031965]; nuclear pore [GO:0005643]; nuclear pore outer ring [GO:0031080]; structural constituent of nuclear pore [GO:0017056]; mRNA export from nucleus [GO:0006406]; nuclear pore distribution [GO:0031081]; positive regulation of transcription, DNA-templated [GO:0045893]; protein import into nucleus [GO:0006606]; ribosomal large subunit export from nucleus [GO:0000055]	nuclear membrane [GO:0031965]; nuclear pore [GO:0005643]; nuclear pore outer ring [GO:0031080]; structural constituent of nuclear pore [GO:0017056]; mRNA export from nucleus [GO:0006406]; nuclear pore distribution [GO:0031081]; positive regulation of transcription, DNA-templated [GO:0045893]; protein import into nucleus [GO:0006606]; ribosomal large subunit export from nucleus [GO:0000055]	nuclear membrane [GO:0031965]; nuclear pore [GO:0005643]; nuclear pore outer ring [GO:0031080]; structural constituent of nuclear pore [GO:0017056]; mRNA export from nucleus [GO:0006406]; nuclear pore distribution [GO:0031081]; positive regulation of transcription, DNA-templated [GO:0045893]; protein import into nucleus [GO:0006606]; ribosomal large subunit export from nucleus [GO:0000055]
OSH7_YEAST	1.74072	0.693883	P38755	Oxysterol-binding protein homolog 7	OSH7 YHR001W	cortical endoplasmic reticulum [GO:0032541]; cytoplasm [GO:0005737]; endoplasmic reticulum membrane [GO:0005789]; lipid binding [GO:0008289]; oxysterol binding [GO:0008142]; phosphatidylinositol-4-phosphate binding [GO:0070273]; phosphatidylserine binding [GO:0001786]; phospholipid transporter activity [GO:0005548]; endocytosis [GO:0006897]; exocytosis [GO:0006887]; late endosome to vacuole trans…	cortical endoplasmic reticulum [GO:0032541]; cytoplasm [GO:0005737]; endoplasmic reticulum membrane [GO:0005789]; lipid binding [GO:0008289]; oxysterol binding [GO:0008142]; phosphatidylinositol-4-phosphate binding [GO:0070273]; phosphatidylserine binding [GO:0001786]; phospholipid transporter activity [GO:0005548]; endocytosis [GO:0006897]; exocytosis [GO:0006887]; late endosome to vacuole trans…	cortical endoplasmic reticulum [GO:0032541]; cytoplasm [GO:0005737]; endoplasmic reticulum membrane [GO:0005789]; lipid binding [GO:0008289]; oxysterol binding [GO:0008142]; phosphatidylinositol-4-phosphate binding [GO:0070273]; phosphatidylserine binding [GO:0001786]; phospholipid transporter activity [GO:0005548]; endocytosis [GO:0006897]; exocytosis [GO:0006887]; late endosome to vacuole trans…	cortical endoplasmic reticulum [GO:0032541]; cytoplasm [GO:0005737]; endoplasmic reticulum membrane [GO:0005789]; lipid binding [GO:0008289]; oxysterol binding [GO:0008142]; phosphatidylinositol-4-phosphate binding [GO:0070273]; phosphatidylserine binding [GO:0001786]; phospholipid transporter activity [GO:0005548]; endocytosis [GO:0006897]; exocytosis [GO:0006887]; late endosome to vacuole trans…
SLY1_YEAST	1.71977	0.691727	P22213	Protein SLY1 (Suppressor of loss of YPT1 protein 1)	SLY1 YDR189W YD9346.01 YD9395.22	cytoplasm [GO:0005737]; endoplasmic reticulum [GO:0005783]; ER to Golgi transport vesicle [GO:0030134]; Golgi membrane [GO:0000139]; membrane [GO:0016020]; SNARE binding [GO:0000149]; syntaxin binding [GO:0019905]; ER to Golgi vesicle-mediated transport [GO:0006888]; positive regulation of SNARE complex assembly [GO:0035543]; protein transport [GO:0015031]; regulation of Ras protein signal transd…	cytoplasm [GO:0005737]; endoplasmic reticulum [GO:0005783]; ER to Golgi transport vesicle [GO:0030134]; Golgi membrane [GO:0000139]; membrane [GO:0016020]; SNARE binding [GO:0000149]; syntaxin binding [GO:0019905]; ER to Golgi vesicle-mediated transport [GO:0006888]; positive regulation of SNARE complex assembly [GO:0035543]; protein transport [GO:0015031]; regulation of Ras protein signal transd…	cytoplasm [GO:0005737]; endoplasmic reticulum [GO:0005783]; ER to Golgi transport vesicle [GO:0030134]; Golgi membrane [GO:0000139]; membrane [GO:0016020]; SNARE binding [GO:0000149]; syntaxin binding [GO:0019905]; ER to Golgi vesicle-mediated transport [GO:0006888]; positive regulation of SNARE complex assembly [GO:0035543]; protein transport [GO:0015031]; regulation of Ras protein signal transd…	cytoplasm [GO:0005737]; endoplasmic reticulum [GO:0005783]; ER to Golgi transport vesicle [GO:0030134]; Golgi membrane [GO:0000139]; membrane [GO:0016020]; SNARE binding [GO:0000149]; syntaxin binding [GO:0019905]; ER to Golgi vesicle-mediated transport [GO:0006888]; positive regulation of SNARE complex assembly [GO:0035543]; protein transport [GO:0015031]; regulation of Ras protein signal transd…
SNO1_YEAST	1.38782	0.675953	Q03144	Pyridoxal 5'-phosphate synthase subunit SNO1 (EC 4.3.3.6) (PDX2 homolog 1) (Pdx2.1) (Pyridoxal 5'-phosphate synthase glutaminase subunit) (EC 3.5.1.2)	SNO1 YMR095C YM6543.02C	cytosol [GO:0005829]; glutaminase complex [GO:1903600]; glutaminase activity [GO:0004359]; pyridoxal 5'-phosphate synthase (glutamine hydrolysing) activity [GO:0036381]; glutamine metabolic process [GO:0006541]; negative regulation of apoptotic process [GO:0043066]; pyridoxal phosphate biosynthetic process [GO:0042823]; pyridoxine biosynthetic process [GO:0008615]	cytosol [GO:0005829]; glutaminase complex [GO:1903600]; glutaminase activity [GO:0004359]; pyridoxal 5'-phosphate synthase (glutamine hydrolysing) activity [GO:0036381]; glutamine metabolic process [GO:0006541]; negative regulation of apoptotic process [GO:0043066]; pyridoxal phosphate biosynthetic process [GO:0042823]; pyridoxine biosynthetic process [GO:0008615]	cytosol [GO:0005829]; glutaminase complex [GO:1903600]; glutaminase activity [GO:0004359]; pyridoxal 5'-phosphate synthase (glutamine hydrolysing) activity [GO:0036381]; glutamine metabolic process [GO:0006541]; negative regulation of apoptotic process [GO:0043066]; pyridoxal phosphate biosynthetic process [GO:0042823]; pyridoxine biosynthetic process [GO:0008615]	cytosol [GO:0005829]; glutaminase complex [GO:1903600]; glutaminase activity [GO:0004359]; pyridoxal 5'-phosphate synthase (glutamine hydrolysing) activity [GO:0036381]; glutamine metabolic process [GO:0006541]; negative regulation of apoptotic process [GO:0043066]; pyridoxal phosphate biosynthetic process [GO:0042823]; pyridoxine biosynthetic process [GO:0008615]
NACB1_YEAST	2.04752	0.669907	Q02642	Nascent polypeptide-associated complex subunit beta-1 (NAC-beta-1) (BTF3 homolog EGD1) (Beta-1-NAC) (GAL4 DNA-binding enhancer protein 1)	EGD1 YPL037C	nascent polypeptide-associated complex [GO:0005854]; nucleus [GO:0005634]; unfolded protein binding [GO:0051082]; 'de novo' cotranslational protein folding [GO:0051083]; macroautophagy [GO:0016236]; posttranslational protein targeting to membrane [GO:0006620]; regulation of transcription, DNA-templated [GO:0006355]; transcription, DNA-templated [GO:0006351]	nascent polypeptide-associated complex [GO:0005854]; nucleus [GO:0005634]; unfolded protein binding [GO:0051082]; 'de novo' cotranslational protein folding [GO:0051083]; macroautophagy [GO:0016236]; posttranslational protein targeting to membrane [GO:0006620]; regulation of transcription, DNA-templated [GO:0006355]; transcription, DNA-templated [GO:0006351]	nascent polypeptide-associated complex [GO:0005854]; nucleus [GO:0005634]; unfolded protein binding [GO:0051082]; 'de novo' cotranslational protein folding [GO:0051083]; macroautophagy [GO:0016236]; posttranslational protein targeting to membrane [GO:0006620]; regulation of transcription, DNA-templated [GO:0006355]; transcription, DNA-templated [GO:0006351]	nascent polypeptide-associated complex [GO:0005854]; nucleus [GO:0005634]; unfolded protein binding [GO:0051082]; 'de novo' cotranslational protein folding [GO:0051083]; macroautophagy [GO:0016236]; posttranslational protein targeting to membrane [GO:0006620]; regulation of transcription, DNA-templated [GO:0006355]; transcription, DNA-templated [GO:0006351]
ATC1_YEAST	1.44843	0.669198	P13586	Calcium-transporting ATPase 1 (EC 3.6.3.8) (Bypass SOD defects protein 1) (Golgi Ca(2+)-ATPase)	PMR1 BSD1 SCC1 YGL167C G1666	Golgi apparatus [GO:0005794]; Golgi membrane [GO:0000139]; integral component of membrane [GO:0016021]; ATP binding [GO:0005524]; calcium ion binding [GO:0005509]; calcium-transporting ATPase activity [GO:0005388]; manganese-transporting ATPase activity [GO:0015410]; calcium ion transport [GO:0006816]; cellular calcium ion homeostasis [GO:0006874]; macroautophagy [GO:0016236]; manganese ion trans…	Golgi apparatus [GO:0005794]; Golgi membrane [GO:0000139]; integral component of membrane [GO:0016021]; ATP binding [GO:0005524]; calcium ion binding [GO:0005509]; calcium-transporting ATPase activity [GO:0005388]; manganese-transporting ATPase activity [GO:0015410]; calcium ion transport [GO:0006816]; cellular calcium ion homeostasis [GO:0006874]; macroautophagy [GO:0016236]; manganese ion trans…	Golgi apparatus [GO:0005794]; Golgi membrane [GO:0000139]; integral component of membrane [GO:0016021]; ATP binding [GO:0005524]; calcium ion binding [GO:0005509]; calcium-transporting ATPase activity [GO:0005388]; manganese-transporting ATPase activity [GO:0015410]; calcium ion transport [GO:0006816]; cellular calcium ion homeostasis [GO:0006874]; macroautophagy [GO:0016236]; manganese ion trans…	Golgi apparatus [GO:0005794]; Golgi membrane [GO:0000139]; integral component of membrane [GO:0016021]; ATP binding [GO:0005524]; calcium ion binding [GO:0005509]; calcium-transporting ATPase activity [GO:0005388]; manganese-transporting ATPase activity [GO:0015410]; calcium ion transport [GO:0006816]; cellular calcium ion homeostasis [GO:0006874]; macroautophagy [GO:0016236]; manganese ion trans…
MDM38_YEAST	1.60945	0.662591	Q08179	Mitochondrial distribution and morphology protein 38	MDM38 YOL027C	integral component of membrane [GO:0016021]; mitochondrial inner membrane [GO:0005743]; ribosome binding [GO:0043022]; cellular potassium ion homeostasis [GO:0030007]; mitochondrial respiratory chain complex III biogenesis [GO:0097033]; mitochondrial respiratory chain complex IV biogenesis [GO:0097034]; positive regulation of mitochondrial translation [GO:0070131]; potassium ion transport [GO:000…	integral component of membrane [GO:0016021]; mitochondrial inner membrane [GO:0005743]; ribosome binding [GO:0043022]; cellular potassium ion homeostasis [GO:0030007]; mitochondrial respiratory chain complex III biogenesis [GO:0097033]; mitochondrial respiratory chain complex IV biogenesis [GO:0097034]; positive regulation of mitochondrial translation [GO:0070131]; potassium ion transport [GO:000…	integral component of membrane [GO:0016021]; mitochondrial inner membrane [GO:0005743]; ribosome binding [GO:0043022]; cellular potassium ion homeostasis [GO:0030007]; mitochondrial respiratory chain complex III biogenesis [GO:0097033]; mitochondrial respiratory chain complex IV biogenesis [GO:0097034]; positive regulation of mitochondrial translation [GO:0070131]; potassium ion transport [GO:000…	integral component of membrane [GO:0016021]; mitochondrial inner membrane [GO:0005743]; ribosome binding [GO:0043022]; cellular potassium ion homeostasis [GO:0030007]; mitochondrial respiratory chain complex III biogenesis [GO:0097033]; mitochondrial respiratory chain complex IV biogenesis [GO:0097034]; positive regulation of mitochondrial translation [GO:0070131]; potassium ion transport [GO:000…
ARPC5_YEAST	1.36743	0.656738	P40518	Actin-related protein 2/3 complex subunit 5 (Arp2/3 complex 16 kDa subunit) (p16-ARC)	ARC15 YIL062C	actin cortical patch [GO:0030479]; Arp2/3 protein complex [GO:0005885]; extrinsic component of mitochondrial outer membrane [GO:0031315]; actin filament binding [GO:0051015]; mRNA binding [GO:0003729]; structural molecule activity [GO:0005198]; actin cortical patch assembly [GO:0000147]; Arp2/3 complex-mediated actin nucleation [GO:0034314]; mitochondrion inheritance [GO:0000001]	actin cortical patch [GO:0030479]; Arp2/3 protein complex [GO:0005885]; extrinsic component of mitochondrial outer membrane [GO:0031315]; actin filament binding [GO:0051015]; mRNA binding [GO:0003729]; structural molecule activity [GO:0005198]; actin cortical patch assembly [GO:0000147]; Arp2/3 complex-mediated actin nucleation [GO:0034314]; mitochondrion inheritance [GO:0000001]	actin cortical patch [GO:0030479]; Arp2/3 protein complex [GO:0005885]; extrinsic component of mitochondrial outer membrane [GO:0031315]; actin filament binding [GO:0051015]; mRNA binding [GO:0003729]; structural molecule activity [GO:0005198]; actin cortical patch assembly [GO:0000147]; Arp2/3 complex-mediated actin nucleation [GO:0034314]; mitochondrion inheritance [GO:0000001]	actin cortical patch [GO:0030479]; Arp2/3 protein complex [GO:0005885]; extrinsic component of mitochondrial outer membrane [GO:0031315]; actin filament binding [GO:0051015]; mRNA binding [GO:0003729]; structural molecule activity [GO:0005198]; actin cortical patch assembly [GO:0000147]; Arp2/3 complex-mediated actin nucleation [GO:0034314]; mitochondrion inheritance [GO:0000001]
ISD11_YEAST	1.40414	0.648728	Q6Q560	Protein ISD11 (Iron-sulfur protein biogenesis, desulfurase-interacting protein 11)	ISD11 YER048W-A	extrinsic component of mitochondrial inner membrane [GO:0031314]; L-cysteine desulfurase complex [GO:1990221]; mitochondrial matrix [GO:0005759]; iron-sulfur cluster assembly [GO:0016226]	extrinsic component of mitochondrial inner membrane [GO:0031314]; L-cysteine desulfurase complex [GO:1990221]; mitochondrial matrix [GO:0005759]; iron-sulfur cluster assembly [GO:0016226]	extrinsic component of mitochondrial inner membrane [GO:0031314]; L-cysteine desulfurase complex [GO:1990221]; mitochondrial matrix [GO:0005759]; iron-sulfur cluster assembly [GO:0016226]	extrinsic component of mitochondrial inner membrane [GO:0031314]; L-cysteine desulfurase complex [GO:1990221]; mitochondrial matrix [GO:0005759]; iron-sulfur cluster assembly [GO:0016226]
PAN1_YEAST	1.95847	0.644592	P32521	Actin cytoskeleton-regulatory complex protein PAN1 (Mitochondrial distribution of proteins protein 3)	PAN1 DIM2 MDP3 MIP3 YIR006C YIB6C	actin cortical patch [GO:0030479]; cytoplasm [GO:0005737]; endosome membrane [GO:0010008]; nucleus [GO:0005634]; plasma membrane [GO:0005886]; actin binding [GO:0003779]; calcium ion binding [GO:0005509]; protein binding, bridging [GO:0030674]; actin cortical patch assembly [GO:0000147]; axial cellular bud site selection [GO:0007120]; bipolar cellular bud site selection [GO:0007121]; endocytosis …	actin cortical patch [GO:0030479]; cytoplasm [GO:0005737]; endosome membrane [GO:0010008]; nucleus [GO:0005634]; plasma membrane [GO:0005886]; actin binding [GO:0003779]; calcium ion binding [GO:0005509]; protein binding, bridging [GO:0030674]; actin cortical patch assembly [GO:0000147]; axial cellular bud site selection [GO:0007120]; bipolar cellular bud site selection [GO:0007121]; endocytosis …	actin cortical patch [GO:0030479]; cytoplasm [GO:0005737]; endosome membrane [GO:0010008]; nucleus [GO:0005634]; plasma membrane [GO:0005886]; actin binding [GO:0003779]; calcium ion binding [GO:0005509]; protein binding, bridging [GO:0030674]; actin cortical patch assembly [GO:0000147]; axial cellular bud site selection [GO:0007120]; bipolar cellular bud site selection [GO:0007121]; endocytosis …	actin cortical patch [GO:0030479]; cytoplasm [GO:0005737]; endosome membrane [GO:0010008]; nucleus [GO:0005634]; plasma membrane [GO:0005886]; actin binding [GO:0003779]; calcium ion binding [GO:0005509]; protein binding, bridging [GO:0030674]; actin cortical patch assembly [GO:0000147]; axial cellular bud site selection [GO:0007120]; bipolar cellular bud site selection [GO:0007121]; endocytosis …
RS20_YEAST	2.79343	0.637318	P38701	40S ribosomal protein S20 (Small ribosomal subunit protein uS10)	RPS20 URP2 YHL015W	cytosolic small ribosomal subunit [GO:0022627]; RNA binding [GO:0003723]; structural constituent of ribosome [GO:0003735]; cytoplasmic translation [GO:0002181]; maturation of SSU-rRNA from tricistronic rRNA transcript (SSU-rRNA, 5.8S rRNA, LSU-rRNA) [GO:0000462]	cytosolic small ribosomal subunit [GO:0022627]; RNA binding [GO:0003723]; structural constituent of ribosome [GO:0003735]; cytoplasmic translation [GO:0002181]; maturation of SSU-rRNA from tricistronic rRNA transcript (SSU-rRNA, 5.8S rRNA, LSU-rRNA) [GO:0000462]	cytosolic small ribosomal subunit [GO:0022627]; RNA binding [GO:0003723]; structural constituent of ribosome [GO:0003735]; cytoplasmic translation [GO:0002181]; maturation of SSU-rRNA from tricistronic rRNA transcript (SSU-rRNA, 5.8S rRNA, LSU-rRNA) [GO:0000462]	cytosolic small ribosomal subunit [GO:0022627]; RNA binding [GO:0003723]; structural constituent of ribosome [GO:0003735]; cytoplasmic translation [GO:0002181]; maturation of SSU-rRNA from tricistronic rRNA transcript (SSU-rRNA, 5.8S rRNA, LSU-rRNA) [GO:0000462]
YJX8_YEAST	1.64113	0.635022	P47085	MEMO1 family protein YJR008W	YJR008W J1431 YJR83.9	cytoplasm [GO:0005737]; nucleus [GO:0005634]	cytoplasm [GO:0005737]; nucleus [GO:0005634]	cytoplasm [GO:0005737]; nucleus [GO:0005634]	cytoplasm [GO:0005737]; nucleus [GO:0005634]
UBP2_YEAST	1.85521	0.603977	Q01476	Ubiquitin carboxyl-terminal hydrolase 2 (EC 3.4.19.12) (Deubiquitinating enzyme 2) (Ubiquitin thioesterase 2) (Ubiquitin-specific-processing protease 2)	UBP2 YOR124C O3281 YOR3281C	cytoplasm [GO:0005737]; thiol-dependent ubiquitin-specific protease activity [GO:0004843]; protein deubiquitination [GO:0016579]; ubiquitin homeostasis [GO:0010992]; ubiquitin-dependent protein catabolic process via the multivesicular body sorting pathway [GO:0043162]	cytoplasm [GO:0005737]; thiol-dependent ubiquitin-specific protease activity [GO:0004843]; protein deubiquitination [GO:0016579]; ubiquitin homeostasis [GO:0010992]; ubiquitin-dependent protein catabolic process via the multivesicular body sorting pathway [GO:0043162]	cytoplasm [GO:0005737]; thiol-dependent ubiquitin-specific protease activity [GO:0004843]; protein deubiquitination [GO:0016579]; ubiquitin homeostasis [GO:0010992]; ubiquitin-dependent protein catabolic process via the multivesicular body sorting pathway [GO:0043162]	cytoplasm [GO:0005737]; thiol-dependent ubiquitin-specific protease activity [GO:0004843]; protein deubiquitination [GO:0016579]; ubiquitin homeostasis [GO:0010992]; ubiquitin-dependent protein catabolic process via the multivesicular body sorting pathway [GO:0043162]
BGL2_YEAST	2.76871	0.602796	P15703	Glucan 1,3-beta-glucosidase (EC 3.2.1.58) (Exo-1,3-beta-glucanase) (GP29) (Soluble cell wall protein 9)	BGL2 SCW9 YGR282C	extracellular region [GO:0005576]; fungal-type cell wall [GO:0009277]; 1,3-beta-glucanosyltransferase activity [GO:0042124]; chitin binding [GO:0008061]; glucan endo-1,3-beta-D-glucosidase activity [GO:0042973]; glucan exo-1,3-beta-glucosidase activity [GO:0004338]; carbohydrate metabolic process [GO:0005975]; fungal-type cell wall organization [GO:0031505]	extracellular region [GO:0005576]; fungal-type cell wall [GO:0009277]; 1,3-beta-glucanosyltransferase activity [GO:0042124]; chitin binding [GO:0008061]; glucan endo-1,3-beta-D-glucosidase activity [GO:0042973]; glucan exo-1,3-beta-glucosidase activity [GO:0004338]; carbohydrate metabolic process [GO:0005975]; fungal-type cell wall organization [GO:0031505]	extracellular region [GO:0005576]; fungal-type cell wall [GO:0009277]; 1,3-beta-glucanosyltransferase activity [GO:0042124]; chitin binding [GO:0008061]; glucan endo-1,3-beta-D-glucosidase activity [GO:0042973]; glucan exo-1,3-beta-glucosidase activity [GO:0004338]; carbohydrate metabolic process [GO:0005975]; fungal-type cell wall organization [GO:0031505]	extracellular region [GO:0005576]; fungal-type cell wall [GO:0009277]; 1,3-beta-glucanosyltransferase activity [GO:0042124]; chitin binding [GO:0008061]; glucan endo-1,3-beta-D-glucosidase activity [GO:0042973]; glucan exo-1,3-beta-glucosidase activity [GO:0004338]; carbohydrate metabolic process [GO:0005975]; fungal-type cell wall organization [GO:0031505]
RS9B_YEAST	2.1133	0.596326	P05755	40S ribosomal protein S9-B (RP21) (S13) (Small ribosomal subunit protein uS4-B) (YP28) (YS11)	RPS9B RPS13B SUP46 YBR189W YBR1317	cytosolic small ribosomal subunit [GO:0022627]; nucleolus [GO:0005730]; small-subunit processome [GO:0032040]; rRNA binding [GO:0019843]; structural constituent of ribosome [GO:0003735]; maturation of SSU-rRNA from tricistronic rRNA transcript (SSU-rRNA, 5.8S rRNA, LSU-rRNA) [GO:0000462]; positive regulation of translational fidelity [GO:0045903]; translation [GO:0006412]	cytosolic small ribosomal subunit [GO:0022627]; nucleolus [GO:0005730]; small-subunit processome [GO:0032040]; rRNA binding [GO:0019843]; structural constituent of ribosome [GO:0003735]; maturation of SSU-rRNA from tricistronic rRNA transcript (SSU-rRNA, 5.8S rRNA, LSU-rRNA) [GO:0000462]; positive regulation of translational fidelity [GO:0045903]; translation [GO:0006412]	cytosolic small ribosomal subunit [GO:0022627]; nucleolus [GO:0005730]; small-subunit processome [GO:0032040]; rRNA binding [GO:0019843]; structural constituent of ribosome [GO:0003735]; maturation of SSU-rRNA from tricistronic rRNA transcript (SSU-rRNA, 5.8S rRNA, LSU-rRNA) [GO:0000462]; positive regulation of translational fidelity [GO:0045903]; translation [GO:0006412]	cytosolic small ribosomal subunit [GO:0022627]; nucleolus [GO:0005730]; small-subunit processome [GO:0032040]; rRNA binding [GO:0019843]; structural constituent of ribosome [GO:0003735]; maturation of SSU-rRNA from tricistronic rRNA transcript (SSU-rRNA, 5.8S rRNA, LSU-rRNA) [GO:0000462]; positive regulation of translational fidelity [GO:0045903]; translation [GO:0006412]
DPM1_YEAST	1.83782	0.59619	P14020	Dolichol-phosphate mannosyltransferase (EC 2.4.1.83) (Dolichol-phosphate mannose synthase) (DPM synthase) (Dolichyl-phosphate beta-D-mannosyltransferase) (Mannose-P-dolichol synthase) (MPD synthase)	DPM1 SED3 YPR183W P9705.3	endoplasmic reticulum [GO:0005783]; endoplasmic reticulum membrane [GO:0005789]; integral component of membrane [GO:0016021]; nuclear outer membrane-endoplasmic reticulum membrane network [GO:0042175]; dolichyl-phosphate beta-D-mannosyltransferase activity [GO:0004582]; dolichol-linked oligosaccharide biosynthetic process [GO:0006488]; GPI anchor biosynthetic process [GO:0006506]; protein glycosy…	endoplasmic reticulum [GO:0005783]; endoplasmic reticulum membrane [GO:0005789]; integral component of membrane [GO:0016021]; nuclear outer membrane-endoplasmic reticulum membrane network [GO:0042175]; dolichyl-phosphate beta-D-mannosyltransferase activity [GO:0004582]; dolichol-linked oligosaccharide biosynthetic process [GO:0006488]; GPI anchor biosynthetic process [GO:0006506]; protein glycosy…	endoplasmic reticulum [GO:0005783]; endoplasmic reticulum membrane [GO:0005789]; integral component of membrane [GO:0016021]; nuclear outer membrane-endoplasmic reticulum membrane network [GO:0042175]; dolichyl-phosphate beta-D-mannosyltransferase activity [GO:0004582]; dolichol-linked oligosaccharide biosynthetic process [GO:0006488]; GPI anchor biosynthetic process [GO:0006506]; protein glycosy…	endoplasmic reticulum [GO:0005783]; endoplasmic reticulum membrane [GO:0005789]; integral component of membrane [GO:0016021]; nuclear outer membrane-endoplasmic reticulum membrane network [GO:0042175]; dolichyl-phosphate beta-D-mannosyltransferase activity [GO:0004582]; dolichol-linked oligosaccharide biosynthetic process [GO:0006488]; GPI anchor biosynthetic process [GO:0006506]; protein glycosy…
RS27B_YEAST	1.57496	0.571284	P38711	40S ribosomal protein S27-B (RP61) (Small ribosomal subunit protein eS27-B) (YS20)	RPS27B YHR021C	cytosolic small ribosomal subunit [GO:0022627]; metal ion binding [GO:0046872]; structural constituent of ribosome [GO:0003735]; cytoplasmic translation [GO:0002181]; endonucleolytic cleavage of tricistronic rRNA transcript (SSU-rRNA, 5.8S rRNA, LSU-rRNA) [GO:0000479]; maturation of SSU-rRNA from tricistronic rRNA transcript (SSU-rRNA, 5.8S rRNA, LSU-rRNA) [GO:0000462]; ribosomal small subunit as…	cytosolic small ribosomal subunit [GO:0022627]; metal ion binding [GO:0046872]; structural constituent of ribosome [GO:0003735]; cytoplasmic translation [GO:0002181]; endonucleolytic cleavage of tricistronic rRNA transcript (SSU-rRNA, 5.8S rRNA, LSU-rRNA) [GO:0000479]; maturation of SSU-rRNA from tricistronic rRNA transcript (SSU-rRNA, 5.8S rRNA, LSU-rRNA) [GO:0000462]; ribosomal small subunit as…	cytosolic small ribosomal subunit [GO:0022627]; metal ion binding [GO:0046872]; structural constituent of ribosome [GO:0003735]; cytoplasmic translation [GO:0002181]; endonucleolytic cleavage of tricistronic rRNA transcript (SSU-rRNA, 5.8S rRNA, LSU-rRNA) [GO:0000479]; maturation of SSU-rRNA from tricistronic rRNA transcript (SSU-rRNA, 5.8S rRNA, LSU-rRNA) [GO:0000462]; ribosomal small subunit as…	cytosolic small ribosomal subunit [GO:0022627]; metal ion binding [GO:0046872]; structural constituent of ribosome [GO:0003735]; cytoplasmic translation [GO:0002181]; endonucleolytic cleavage of tricistronic rRNA transcript (SSU-rRNA, 5.8S rRNA, LSU-rRNA) [GO:0000479]; maturation of SSU-rRNA from tricistronic rRNA transcript (SSU-rRNA, 5.8S rRNA, LSU-rRNA) [GO:0000462]; ribosomal small subunit as…
DLD3_YEAST	3.67651	0.558546	P39976	D-2-hydroxyglutarate--pyruvate transhydrogenase DLD3 (D-2HG--pyruvate transhydrogenase DLD3) (EC 1.1.99.40) ((R)-2-hydroxyglutarate--pyruvate transhydrogenase) (D-lactate dehydrogenase [cytochrome] 3) (EC 1.1.2.4) (D-lactate ferricytochrome C oxidoreductase) (D-LCR)	DLD3 YEL071W	cytoplasm [GO:0005737]; mitochondrion [GO:0005739]; (D)-2-hydroxyglutarate-pyruvate transhydrogenase activity [GO:0099615]; (R)-2-hydroxyglutarate dehydrogenase activity [GO:0051990]; D-lactate dehydrogenase (cytochrome) activity [GO:0004458]; FAD binding [GO:0071949]; filamentous growth [GO:0030447]; lactate biosynthetic process [GO:0019249]; lactate oxidation [GO:0019516]; respiratory electron …	cytoplasm [GO:0005737]; mitochondrion [GO:0005739]; (D)-2-hydroxyglutarate-pyruvate transhydrogenase activity [GO:0099615]; (R)-2-hydroxyglutarate dehydrogenase activity [GO:0051990]; D-lactate dehydrogenase (cytochrome) activity [GO:0004458]; FAD binding [GO:0071949]; filamentous growth [GO:0030447]; lactate biosynthetic process [GO:0019249]; lactate oxidation [GO:0019516]; respiratory electron …	cytoplasm [GO:0005737]; mitochondrion [GO:0005739]; (D)-2-hydroxyglutarate-pyruvate transhydrogenase activity [GO:0099615]; (R)-2-hydroxyglutarate dehydrogenase activity [GO:0051990]; D-lactate dehydrogenase (cytochrome) activity [GO:0004458]; FAD binding [GO:0071949]; filamentous growth [GO:0030447]; lactate biosynthetic process [GO:0019249]; lactate oxidation [GO:0019516]; respiratory electron …	cytoplasm [GO:0005737]; mitochondrion [GO:0005739]; (D)-2-hydroxyglutarate-pyruvate transhydrogenase activity [GO:0099615]; (R)-2-hydroxyglutarate dehydrogenase activity [GO:0051990]; D-lactate dehydrogenase (cytochrome) activity [GO:0004458]; FAD binding [GO:0071949]; filamentous growth [GO:0030447]; lactate biosynthetic process [GO:0019249]; lactate oxidation [GO:0019516]; respiratory electron …
RSSA2_YEAST	1.92181	0.552978	P46654	40S ribosomal protein S0-B (Nucleic acid-binding protein NAB1B) (Small ribosomal subunit protein uS2-B)	RPS0B NAB1B NAB4 YST2 YLR048W L2118	90S preribosome [GO:0030686]; cytosolic small ribosomal subunit [GO:0022627]; structural constituent of ribosome [GO:0003735]; cytoplasmic translation [GO:0002181]; endonucleolytic cleavage in ITS1 to separate SSU-rRNA from 5.8S rRNA and LSU-rRNA from tricistronic rRNA transcript (SSU-rRNA, 5.8S rRNA, LSU-rRNA) [GO:0000447]; endonucleolytic cleavage to generate mature 3'-end of SSU-rRNA from (SSU…	90S preribosome [GO:0030686]; cytosolic small ribosomal subunit [GO:0022627]; structural constituent of ribosome [GO:0003735]; cytoplasmic translation [GO:0002181]; endonucleolytic cleavage in ITS1 to separate SSU-rRNA from 5.8S rRNA and LSU-rRNA from tricistronic rRNA transcript (SSU-rRNA, 5.8S rRNA, LSU-rRNA) [GO:0000447]; endonucleolytic cleavage to generate mature 3'-end of SSU-rRNA from (SSU…	90S preribosome [GO:0030686]; cytosolic small ribosomal subunit [GO:0022627]; structural constituent of ribosome [GO:0003735]; cytoplasmic translation [GO:0002181]; endonucleolytic cleavage in ITS1 to separate SSU-rRNA from 5.8S rRNA and LSU-rRNA from tricistronic rRNA transcript (SSU-rRNA, 5.8S rRNA, LSU-rRNA) [GO:0000447]; endonucleolytic cleavage to generate mature 3'-end of SSU-rRNA from (SSU…	90S preribosome [GO:0030686]; cytosolic small ribosomal subunit [GO:0022627]; structural constituent of ribosome [GO:0003735]; cytoplasmic translation [GO:0002181]; endonucleolytic cleavage in ITS1 to separate SSU-rRNA from 5.8S rRNA and LSU-rRNA from tricistronic rRNA transcript (SSU-rRNA, 5.8S rRNA, LSU-rRNA) [GO:0000447]; endonucleolytic cleavage to generate mature 3'-end of SSU-rRNA from (SSU…
GPA2_YEAST	1.70219	0.542917	P10823	Guanine nucleotide-binding protein alpha-2 subunit (GP2-alpha)	GPA2 SSP101 YER020W	heterotrimeric G-protein complex [GO:0005834]; plasma membrane [GO:0005886]; G-protein beta/gamma-subunit complex binding [GO:0031683]; G-protein coupled receptor binding [GO:0001664]; GTP binding [GO:0005525]; GTPase activity [GO:0003924]; metal ion binding [GO:0046872]; signal transducer activity [GO:0004871]; adenylate cyclase-activating G-protein coupled receptor signaling pathway [GO:0007189…	heterotrimeric G-protein complex [GO:0005834]; plasma membrane [GO:0005886]; G-protein beta/gamma-subunit complex binding [GO:0031683]; G-protein coupled receptor binding [GO:0001664]; GTP binding [GO:0005525]; GTPase activity [GO:0003924]; metal ion binding [GO:0046872]; signal transducer activity [GO:0004871]; adenylate cyclase-activating G-protein coupled receptor signaling pathway [GO:0007189…	heterotrimeric G-protein complex [GO:0005834]; plasma membrane [GO:0005886]; G-protein beta/gamma-subunit complex binding [GO:0031683]; G-protein coupled receptor binding [GO:0001664]; GTP binding [GO:0005525]; GTPase activity [GO:0003924]; metal ion binding [GO:0046872]; signal transducer activity [GO:0004871]; adenylate cyclase-activating G-protein coupled receptor signaling pathway [GO:0007189…	heterotrimeric G-protein complex [GO:0005834]; plasma membrane [GO:0005886]; G-protein beta/gamma-subunit complex binding [GO:0031683]; G-protein coupled receptor binding [GO:0001664]; GTP binding [GO:0005525]; GTPase activity [GO:0003924]; metal ion binding [GO:0046872]; signal transducer activity [GO:0004871]; adenylate cyclase-activating G-protein coupled receptor signaling pathway [GO:0007189…
EF1B_YEAST	2.39036	0.541816	P32471	Elongation factor 1-beta (EF-1-beta) (Eukaryotic elongation factor 1Balpha) (eEF1Balpha) (Translation elongation factor 1B alpha)	EFB1 TEF5 YAL003W	eukaryotic translation elongation factor 1 complex [GO:0005853]; guanyl-nucleotide exchange factor activity [GO:0005085]; translation elongation factor activity [GO:0003746]; maintenance of translational fidelity [GO:1990145]; negative regulation of actin filament bundle assembly [GO:0032232]; regulation of translational termination [GO:0006449]; translational elongation [GO:0006414]	eukaryotic translation elongation factor 1 complex [GO:0005853]; guanyl-nucleotide exchange factor activity [GO:0005085]; translation elongation factor activity [GO:0003746]; maintenance of translational fidelity [GO:1990145]; negative regulation of actin filament bundle assembly [GO:0032232]; regulation of translational termination [GO:0006449]; translational elongation [GO:0006414]	eukaryotic translation elongation factor 1 complex [GO:0005853]; guanyl-nucleotide exchange factor activity [GO:0005085]; translation elongation factor activity [GO:0003746]; maintenance of translational fidelity [GO:1990145]; negative regulation of actin filament bundle assembly [GO:0032232]; regulation of translational termination [GO:0006449]; translational elongation [GO:0006414]	eukaryotic translation elongation factor 1 complex [GO:0005853]; guanyl-nucleotide exchange factor activity [GO:0005085]; translation elongation factor activity [GO:0003746]; maintenance of translational fidelity [GO:1990145]; negative regulation of actin filament bundle assembly [GO:0032232]; regulation of translational termination [GO:0006449]; translational elongation [GO:0006414]
YFH6_YEAST	2.17299	0.537099	P43590	Uncharacterized peptidase YFR006W (EC 3.4.-.-)	YFR006W	integral component of membrane [GO:0016021]; aminopeptidase activity [GO:0004177]; manganese ion binding [GO:0030145]	integral component of membrane [GO:0016021]; aminopeptidase activity [GO:0004177]; manganese ion binding [GO:0030145]	integral component of membrane [GO:0016021]; aminopeptidase activity [GO:0004177]; manganese ion binding [GO:0030145]	integral component of membrane [GO:0016021]; aminopeptidase activity [GO:0004177]; manganese ion binding [GO:0030145]
PDX3_YEAST	2.93898	0.527506	P38075	Pyridoxamine 5'-phosphate oxidase (EC 1.4.3.5) (PNP/PMP oxidase) (PNPOx)	PDX3 YBR035C YBR0321	mitochondrial intermembrane space [GO:0005758]; FMN binding [GO:0010181]; pyridoxamine-phosphate oxidase activity [GO:0004733]; pyridoxal 5'-phosphate salvage [GO:0009443]; pyridoxine biosynthetic process [GO:0008615]	mitochondrial intermembrane space [GO:0005758]; FMN binding [GO:0010181]; pyridoxamine-phosphate oxidase activity [GO:0004733]; pyridoxal 5'-phosphate salvage [GO:0009443]; pyridoxine biosynthetic process [GO:0008615]	mitochondrial intermembrane space [GO:0005758]; FMN binding [GO:0010181]; pyridoxamine-phosphate oxidase activity [GO:0004733]; pyridoxal 5'-phosphate salvage [GO:0009443]; pyridoxine biosynthetic process [GO:0008615]	mitochondrial intermembrane space [GO:0005758]; FMN binding [GO:0010181]; pyridoxamine-phosphate oxidase activity [GO:0004733]; pyridoxal 5'-phosphate salvage [GO:0009443]; pyridoxine biosynthetic process [GO:0008615]
YIK8_YEAST	1.75945	0.524881	P40483	Putative zinc metalloproteinase YIL108W (EC 3.4.24.-)	YIL108W	cytoplasm [GO:0005737]; metal ion binding [GO:0046872]; metallopeptidase activity [GO:0008237]	cytoplasm [GO:0005737]; metal ion binding [GO:0046872]; metallopeptidase activity [GO:0008237]	cytoplasm [GO:0005737]; metal ion binding [GO:0046872]; metallopeptidase activity [GO:0008237]	cytoplasm [GO:0005737]; metal ion binding [GO:0046872]; metallopeptidase activity [GO:0008237]
TCTP_YEAST	2.16589	0.517212	P35691	Translationally-controlled tumor protein homolog (TCTP) (Microtubule and mitochondria-interacting protein 1) (Translation machinery-associated protein 19)	TMA19 MMI1 YKL056C YKL312	cytoplasmic stress granule [GO:0010494]; cytosol [GO:0005829]; microtubule [GO:0005874]; mitochondrion [GO:0005739]; calcium ion binding [GO:0005509]; microtubule binding [GO:0008017]; cell differentiation [GO:0030154]; cellular response to oxidative stress [GO:0034599]; cytoplasmic translation [GO:0002181]	cytoplasmic stress granule [GO:0010494]; cytosol [GO:0005829]; microtubule [GO:0005874]; mitochondrion [GO:0005739]; calcium ion binding [GO:0005509]; microtubule binding [GO:0008017]; cell differentiation [GO:0030154]; cellular response to oxidative stress [GO:0034599]; cytoplasmic translation [GO:0002181]	cytoplasmic stress granule [GO:0010494]; cytosol [GO:0005829]; microtubule [GO:0005874]; mitochondrion [GO:0005739]; calcium ion binding [GO:0005509]; microtubule binding [GO:0008017]; cell differentiation [GO:0030154]; cellular response to oxidative stress [GO:0034599]; cytoplasmic translation [GO:0002181]	cytoplasmic stress granule [GO:0010494]; cytosol [GO:0005829]; microtubule [GO:0005874]; mitochondrion [GO:0005739]; calcium ion binding [GO:0005509]; microtubule binding [GO:0008017]; cell differentiation [GO:0030154]; cellular response to oxidative stress [GO:0034599]; cytoplasmic translation [GO:0002181]
RS28A_YEAST	1.61486	0.513757	Q3E7X9	40S ribosomal protein S28-A (S33) (Small ribosomal subunit protein eS28-A) (YS27)	RPS28A RPS33 RPS33A YOR167C O3600	cytosolic small ribosomal subunit [GO:0022627]; RNA binding [GO:0003723]; structural constituent of ribosome [GO:0003735]; cytoplasmic translation [GO:0002181]; maturation of SSU-rRNA [GO:0030490]; positive regulation of nuclear-transcribed mRNA catabolic process, deadenylation-dependent decay [GO:1900153]; ribosomal small subunit assembly [GO:0000028]; rRNA export from nucleus [GO:0006407]	cytosolic small ribosomal subunit [GO:0022627]; RNA binding [GO:0003723]; structural constituent of ribosome [GO:0003735]; cytoplasmic translation [GO:0002181]; maturation of SSU-rRNA [GO:0030490]; positive regulation of nuclear-transcribed mRNA catabolic process, deadenylation-dependent decay [GO:1900153]; ribosomal small subunit assembly [GO:0000028]; rRNA export from nucleus [GO:0006407]	cytosolic small ribosomal subunit [GO:0022627]; RNA binding [GO:0003723]; structural constituent of ribosome [GO:0003735]; cytoplasmic translation [GO:0002181]; maturation of SSU-rRNA [GO:0030490]; positive regulation of nuclear-transcribed mRNA catabolic process, deadenylation-dependent decay [GO:1900153]; ribosomal small subunit assembly [GO:0000028]; rRNA export from nucleus [GO:0006407]	cytosolic small ribosomal subunit [GO:0022627]; RNA binding [GO:0003723]; structural constituent of ribosome [GO:0003735]; cytoplasmic translation [GO:0002181]; maturation of SSU-rRNA [GO:0030490]; positive regulation of nuclear-transcribed mRNA catabolic process, deadenylation-dependent decay [GO:1900153]; ribosomal small subunit assembly [GO:0000028]; rRNA export from nucleus [GO:0006407]
YJ12B_YEAST	2.39131	0.508757	P47100	Transposon Ty1-JR2 Gag-Pol polyprotein (Gag-Pol-p199) (TY1A-TY1B) (Transposon Ty1 TYA-TYB polyprotein) (p190) [Cleaved into: Capsid protein (CA) (Gag-p45) (p54); Ty1 protease (PR) (EC 3.4.23.-) (Pol-p20) (p23); Integrase (IN) (Pol-p71) (p84) (p90); Reverse transcriptase/ribonuclease H (RT) (RT-RH) (EC 2.7.7.49) (EC 2.7.7.7) (EC 3.1.26.4) (Pol-p63) (p60)]	TY1B-JR2 YJRWTy1-2 POL YJR029W J1570	cytoplasm [GO:0005737]; nucleus [GO:0005634]; retrotransposon nucleocapsid [GO:0000943]; aspartic-type endopeptidase activity [GO:0004190]; ATP binding [GO:0005524]; DNA binding [GO:0003677]; DNA-directed DNA polymerase activity [GO:0003887]; metal ion binding [GO:0046872]; peptidase activity [GO:0008233]; ribonuclease activity [GO:0004540]; RNA binding [GO:0003723]; RNA-directed DNA polymerase a…	cytoplasm [GO:0005737]; nucleus [GO:0005634]; retrotransposon nucleocapsid [GO:0000943]; aspartic-type endopeptidase activity [GO:0004190]; ATP binding [GO:0005524]; DNA binding [GO:0003677]; DNA-directed DNA polymerase activity [GO:0003887]; metal ion binding [GO:0046872]; peptidase activity [GO:0008233]; ribonuclease activity [GO:0004540]; RNA binding [GO:0003723]; RNA-directed DNA polymerase a…	cytoplasm [GO:0005737]; nucleus [GO:0005634]; retrotransposon nucleocapsid [GO:0000943]; aspartic-type endopeptidase activity [GO:0004190]; ATP binding [GO:0005524]; DNA binding [GO:0003677]; DNA-directed DNA polymerase activity [GO:0003887]; metal ion binding [GO:0046872]; peptidase activity [GO:0008233]; ribonuclease activity [GO:0004540]; RNA binding [GO:0003723]; RNA-directed DNA polymerase a…	cytoplasm [GO:0005737]; nucleus [GO:0005634]; retrotransposon nucleocapsid [GO:0000943]; aspartic-type endopeptidase activity [GO:0004190]; ATP binding [GO:0005524]; DNA binding [GO:0003677]; DNA-directed DNA polymerase activity [GO:0003887]; metal ion binding [GO:0046872]; peptidase activity [GO:0008233]; ribonuclease activity [GO:0004540]; RNA binding [GO:0003723]; RNA-directed DNA polymerase a…
RL24B_YEAST	1.84327	0.50052	P24000	60S ribosomal protein L24-B (L30) (Large ribosomal subunit protein eL24-B) (RP29) (YL21)	RPL24B RPL30B YGR148C G6635	cytosolic large ribosomal subunit [GO:0022625]; RNA binding [GO:0003723]; structural constituent of ribosome [GO:0003735]; assembly of large subunit precursor of preribosome [GO:1902626]; cytoplasmic translation [GO:0002181]; ribosomal large subunit assembly [GO:0000027]; translation [GO:0006412]	cytosolic large ribosomal subunit [GO:0022625]; RNA binding [GO:0003723]; structural constituent of ribosome [GO:0003735]; assembly of large subunit precursor of preribosome [GO:1902626]; cytoplasmic translation [GO:0002181]; ribosomal large subunit assembly [GO:0000027]; translation [GO:0006412]	cytosolic large ribosomal subunit [GO:0022625]; RNA binding [GO:0003723]; structural constituent of ribosome [GO:0003735]; assembly of large subunit precursor of preribosome [GO:1902626]; cytoplasmic translation [GO:0002181]; ribosomal large subunit assembly [GO:0000027]; translation [GO:0006412]	cytosolic large ribosomal subunit [GO:0022625]; RNA binding [GO:0003723]; structural constituent of ribosome [GO:0003735]; assembly of large subunit precursor of preribosome [GO:1902626]; cytoplasmic translation [GO:0002181]; ribosomal large subunit assembly [GO:0000027]; translation [GO:0006412]
RL36B_YEAST	2.54714	0.498207	O14455	60S ribosomal protein L36-B (L39) (Large ribosomal subunit protein eL36-B) (YL39)	RPL36B RPL39B YPL249C-A YPL249BC	cytosolic large ribosomal subunit [GO:0022625]; RNA binding [GO:0003723]; structural constituent of ribosome [GO:0003735]; cytoplasmic translation [GO:0002181]	cytosolic large ribosomal subunit [GO:0022625]; RNA binding [GO:0003723]; structural constituent of ribosome [GO:0003735]; cytoplasmic translation [GO:0002181]	cytosolic large ribosomal subunit [GO:0022625]; RNA binding [GO:0003723]; structural constituent of ribosome [GO:0003735]; cytoplasmic translation [GO:0002181]	cytosolic large ribosomal subunit [GO:0022625]; RNA binding [GO:0003723]; structural constituent of ribosome [GO:0003735]; cytoplasmic translation [GO:0002181]
RS3_YEAST	3.31104	0.495136	P05750	40S ribosomal protein S3 (RP13) (Small ribosomal subunit protein uS3) (YS3)	RPS3 SUF14 YNL178W N1653	cytosolic small ribosomal subunit [GO:0022627]; nucleus [GO:0005634]; preribosome, small subunit precursor [GO:0030688]; damaged DNA binding [GO:0003684]; DNA-(apurinic or apyrimidinic site) lyase activity [GO:0003906]; oxidized purine nucleobase lesion DNA N-glycosylase activity [GO:0008534]; RNA binding [GO:0003723]; structural constituent of ribosome [GO:0003735]; cytoplasmic translation [GO:0…	cytosolic small ribosomal subunit [GO:0022627]; nucleus [GO:0005634]; preribosome, small subunit precursor [GO:0030688]; damaged DNA binding [GO:0003684]; DNA-(apurinic or apyrimidinic site) lyase activity [GO:0003906]; oxidized purine nucleobase lesion DNA N-glycosylase activity [GO:0008534]; RNA binding [GO:0003723]; structural constituent of ribosome [GO:0003735]; cytoplasmic translation [GO:0…	cytosolic small ribosomal subunit [GO:0022627]; nucleus [GO:0005634]; preribosome, small subunit precursor [GO:0030688]; damaged DNA binding [GO:0003684]; DNA-(apurinic or apyrimidinic site) lyase activity [GO:0003906]; oxidized purine nucleobase lesion DNA N-glycosylase activity [GO:0008534]; RNA binding [GO:0003723]; structural constituent of ribosome [GO:0003735]; cytoplasmic translation [GO:0…	cytosolic small ribosomal subunit [GO:0022627]; nucleus [GO:0005634]; preribosome, small subunit precursor [GO:0030688]; damaged DNA binding [GO:0003684]; DNA-(apurinic or apyrimidinic site) lyase activity [GO:0003906]; oxidized purine nucleobase lesion DNA N-glycosylase activity [GO:0008534]; RNA binding [GO:0003723]; structural constituent of ribosome [GO:0003735]; cytoplasmic translation [GO:0…
YK50_YEAST	1.65097	0.475323	P36151	Uncharacterized protein YKR070W	YKR070W	glycerophospholipid biosynthetic process [GO:0046474]	glycerophospholipid biosynthetic process [GO:0046474]	glycerophospholipid biosynthetic process [GO:0046474]	glycerophospholipid biosynthetic process [GO:0046474]
SEC4_YEAST	1.78445	0.474115	P07560	Ras-related protein SEC4 (Suppressor of RHO3 protein 6)	SEC4 SRO6 YFL005W	endosome [GO:0005768]; incipient cellular bud site [GO:0000131]; mating projection tip [GO:0043332]; plasma membrane [GO:0005886]; transport vesicle [GO:0030133]; transport vesicle membrane [GO:0030658]; vesicle [GO:0031982]; GTP binding [GO:0005525]; GTPase activity [GO:0003924]; ascospore-type prospore assembly [GO:0031321]; autophagy [GO:0006914]; exocytosis [GO:0006887]; Golgi to plasma membr…	endosome [GO:0005768]; incipient cellular bud site [GO:0000131]; mating projection tip [GO:0043332]; plasma membrane [GO:0005886]; transport vesicle [GO:0030133]; transport vesicle membrane [GO:0030658]; vesicle [GO:0031982]; GTP binding [GO:0005525]; GTPase activity [GO:0003924]; ascospore-type prospore assembly [GO:0031321]; autophagy [GO:0006914]; exocytosis [GO:0006887]; Golgi to plasma membr…	endosome [GO:0005768]; incipient cellular bud site [GO:0000131]; mating projection tip [GO:0043332]; plasma membrane [GO:0005886]; transport vesicle [GO:0030133]; transport vesicle membrane [GO:0030658]; vesicle [GO:0031982]; GTP binding [GO:0005525]; GTPase activity [GO:0003924]; ascospore-type prospore assembly [GO:0031321]; autophagy [GO:0006914]; exocytosis [GO:0006887]; Golgi to plasma membr…	endosome [GO:0005768]; incipient cellular bud site [GO:0000131]; mating projection tip [GO:0043332]; plasma membrane [GO:0005886]; transport vesicle [GO:0030133]; transport vesicle membrane [GO:0030658]; vesicle [GO:0031982]; GTP binding [GO:0005525]; GTPase activity [GO:0003924]; ascospore-type prospore assembly [GO:0031321]; autophagy [GO:0006914]; exocytosis [GO:0006887]; Golgi to plasma membr…
TMA20_YEAST	2.84731	0.472196	P89886	Translation machinery-associated protein 20	TMA20 YER007C-A	cytosol [GO:0005829]; cytosolic small ribosomal subunit [GO:0022627]; RNA binding [GO:0003723]; formation of translation preinitiation complex [GO:0001731]; ribosome biogenesis [GO:0042254]; translation reinitiation [GO:0002188]	cytosol [GO:0005829]; cytosolic small ribosomal subunit [GO:0022627]; RNA binding [GO:0003723]; formation of translation preinitiation complex [GO:0001731]; ribosome biogenesis [GO:0042254]; translation reinitiation [GO:0002188]	cytosol [GO:0005829]; cytosolic small ribosomal subunit [GO:0022627]; RNA binding [GO:0003723]; formation of translation preinitiation complex [GO:0001731]; ribosome biogenesis [GO:0042254]; translation reinitiation [GO:0002188]	cytosol [GO:0005829]; cytosolic small ribosomal subunit [GO:0022627]; RNA binding [GO:0003723]; formation of translation preinitiation complex [GO:0001731]; ribosome biogenesis [GO:0042254]; translation reinitiation [GO:0002188]
RL6B_YEAST	2.2606	0.452695	P05739	60S ribosomal protein L6-B (L17) (Large ribosomal subunit protein eL6-B) (RP18) (YL16)	RPL6B RPL16B RPL17B YL16B YLR448W L9324.4	cytosolic large ribosomal subunit [GO:0022625]; RNA binding [GO:0003723]; structural constituent of ribosome [GO:0003735]; cytoplasmic translation [GO:0002181]; ribosomal large subunit assembly [GO:0000027]	cytosolic large ribosomal subunit [GO:0022625]; RNA binding [GO:0003723]; structural constituent of ribosome [GO:0003735]; cytoplasmic translation [GO:0002181]; ribosomal large subunit assembly [GO:0000027]	cytosolic large ribosomal subunit [GO:0022625]; RNA binding [GO:0003723]; structural constituent of ribosome [GO:0003735]; cytoplasmic translation [GO:0002181]; ribosomal large subunit assembly [GO:0000027]	cytosolic large ribosomal subunit [GO:0022625]; RNA binding [GO:0003723]; structural constituent of ribosome [GO:0003735]; cytoplasmic translation [GO:0002181]; ribosomal large subunit assembly [GO:0000027]
AMPL_YEAST	1.76501	0.445424	P14904	Vacuolar aminopeptidase 1 (EC 3.4.11.22) (Aminopeptidase yscI) (Leucine aminopeptidase IV) (LAPIV) (Lysosomal aminopeptidase III) (Polypeptidase) (Vacuolar aminopeptidase I)	APE1 API LAP4 YSC1 YKL103C YKL455	extracellular region [GO:0005576]; fungal-type vacuole [GO:0000324]; identical protein binding [GO:0042802]; metalloaminopeptidase activity [GO:0070006]; zinc ion binding [GO:0008270]; peptide metabolic process [GO:0006518]; protein catabolic process in the vacuole [GO:0007039]; protein transport [GO:0015031]	extracellular region [GO:0005576]; fungal-type vacuole [GO:0000324]; identical protein binding [GO:0042802]; metalloaminopeptidase activity [GO:0070006]; zinc ion binding [GO:0008270]; peptide metabolic process [GO:0006518]; protein catabolic process in the vacuole [GO:0007039]; protein transport [GO:0015031]	extracellular region [GO:0005576]; fungal-type vacuole [GO:0000324]; identical protein binding [GO:0042802]; metalloaminopeptidase activity [GO:0070006]; zinc ion binding [GO:0008270]; peptide metabolic process [GO:0006518]; protein catabolic process in the vacuole [GO:0007039]; protein transport [GO:0015031]	extracellular region [GO:0005576]; fungal-type vacuole [GO:0000324]; identical protein binding [GO:0042802]; metalloaminopeptidase activity [GO:0070006]; zinc ion binding [GO:0008270]; peptide metabolic process [GO:0006518]; protein catabolic process in the vacuole [GO:0007039]; protein transport [GO:0015031]
VDAC1_YEAST	2.17211	0.424347	P04840	Mitochondrial outer membrane protein porin 1 (Voltage-dependent anion-selective channel protein 1) (VDAC-1)	POR1 OMP2 VDAC1 YNL055C N2441 YNL2441C	integral component of mitochondrial outer membrane [GO:0031307]; mitochondrial intermembrane space [GO:0005758]; mitochondrial outer membrane [GO:0005741]; mitochondrion [GO:0005739]; pore complex [GO:0046930]; porin activity [GO:0015288]; voltage-gated anion channel activity [GO:0008308]; apoptotic process [GO:0006915]; cell redox homeostasis [GO:0045454]; DNA transport [GO:0051027]; ion transpo…	integral component of mitochondrial outer membrane [GO:0031307]; mitochondrial intermembrane space [GO:0005758]; mitochondrial outer membrane [GO:0005741]; mitochondrion [GO:0005739]; pore complex [GO:0046930]; porin activity [GO:0015288]; voltage-gated anion channel activity [GO:0008308]; apoptotic process [GO:0006915]; cell redox homeostasis [GO:0045454]; DNA transport [GO:0051027]; ion transpo…	integral component of mitochondrial outer membrane [GO:0031307]; mitochondrial intermembrane space [GO:0005758]; mitochondrial outer membrane [GO:0005741]; mitochondrion [GO:0005739]; pore complex [GO:0046930]; porin activity [GO:0015288]; voltage-gated anion channel activity [GO:0008308]; apoptotic process [GO:0006915]; cell redox homeostasis [GO:0045454]; DNA transport [GO:0051027]; ion transpo…	integral component of mitochondrial outer membrane [GO:0031307]; mitochondrial intermembrane space [GO:0005758]; mitochondrial outer membrane [GO:0005741]; mitochondrion [GO:0005739]; pore complex [GO:0046930]; porin activity [GO:0015288]; voltage-gated anion channel activity [GO:0008308]; apoptotic process [GO:0006915]; cell redox homeostasis [GO:0045454]; DNA transport [GO:0051027]; ion transpo…
PNC1_YEAST	2.05902	0.419073	P53184	Nicotinamidase (EC 3.5.1.19) (Nicotinamide deamidase) (NAMase)	PNC1 YGL037C	chromosome, telomeric region [GO:0000781]; cytoplasm [GO:0005737]; nucleus [GO:0005634]; peroxisome [GO:0005777]; metal ion binding [GO:0046872]; nicotinamidase activity [GO:0008936]; chromatin silencing at rDNA [GO:0000183]; chromatin silencing at telomere [GO:0006348]; negative regulation of DNA amplification [GO:1904524]; nicotinate nucleotide salvage [GO:0019358]; replicative cell aging [GO:0…	chromosome, telomeric region [GO:0000781]; cytoplasm [GO:0005737]; nucleus [GO:0005634]; peroxisome [GO:0005777]; metal ion binding [GO:0046872]; nicotinamidase activity [GO:0008936]; chromatin silencing at rDNA [GO:0000183]; chromatin silencing at telomere [GO:0006348]; negative regulation of DNA amplification [GO:1904524]; nicotinate nucleotide salvage [GO:0019358]; replicative cell aging [GO:0…	chromosome, telomeric region [GO:0000781]; cytoplasm [GO:0005737]; nucleus [GO:0005634]; peroxisome [GO:0005777]; metal ion binding [GO:0046872]; nicotinamidase activity [GO:0008936]; chromatin silencing at rDNA [GO:0000183]; chromatin silencing at telomere [GO:0006348]; negative regulation of DNA amplification [GO:1904524]; nicotinate nucleotide salvage [GO:0019358]; replicative cell aging [GO:0…	chromosome, telomeric region [GO:0000781]; cytoplasm [GO:0005737]; nucleus [GO:0005634]; peroxisome [GO:0005777]; metal ion binding [GO:0046872]; nicotinamidase activity [GO:0008936]; chromatin silencing at rDNA [GO:0000183]; chromatin silencing at telomere [GO:0006348]; negative regulation of DNA amplification [GO:1904524]; nicotinate nucleotide salvage [GO:0019358]; replicative cell aging [GO:0…
ADH4_YEAST	3.26588	0.416418	P10127	Alcohol dehydrogenase 4 (EC 1.1.1.1) (Alcohol dehydrogenase IV) (ADHIV)	ADH4 ZRG5 YGL256W NRC465	mitochondrion [GO:0005739]; alcohol dehydrogenase (NAD) activity [GO:0004022]; metal ion binding [GO:0046872]; amino acid catabolic process to alcohol via Ehrlich pathway [GO:0000947]; fermentation [GO:0006113]	mitochondrion [GO:0005739]; alcohol dehydrogenase (NAD) activity [GO:0004022]; metal ion binding [GO:0046872]; amino acid catabolic process to alcohol via Ehrlich pathway [GO:0000947]; fermentation [GO:0006113]	mitochondrion [GO:0005739]; alcohol dehydrogenase (NAD) activity [GO:0004022]; metal ion binding [GO:0046872]; amino acid catabolic process to alcohol via Ehrlich pathway [GO:0000947]; fermentation [GO:0006113]	mitochondrion [GO:0005739]; alcohol dehydrogenase (NAD) activity [GO:0004022]; metal ion binding [GO:0046872]; amino acid catabolic process to alcohol via Ehrlich pathway [GO:0000947]; fermentation [GO:0006113]
TOM40_YEAST	1.8947	0.409256	P23644	Mitochondrial import receptor subunit TOM40 (Mitochondrial import site protein ISP42) (Translocase of outer membrane 40 kDa subunit)	TOM40 ISP42 MOM38 YMR203W YM8325.04	cytosol [GO:0005829]; mitochondrial intermembrane space [GO:0005758]; mitochondrial outer membrane [GO:0005741]; mitochondrial outer membrane translocase complex [GO:0005742]; pore complex [GO:0046930]; porin activity [GO:0015288]; protein channel activity [GO:0015266]; ion transport [GO:0006811]; protein import into mitochondrial matrix [GO:0030150]; protein targeting to mitochondrion [GO:000662…	cytosol [GO:0005829]; mitochondrial intermembrane space [GO:0005758]; mitochondrial outer membrane [GO:0005741]; mitochondrial outer membrane translocase complex [GO:0005742]; pore complex [GO:0046930]; porin activity [GO:0015288]; protein channel activity [GO:0015266]; ion transport [GO:0006811]; protein import into mitochondrial matrix [GO:0030150]; protein targeting to mitochondrion [GO:000662…	cytosol [GO:0005829]; mitochondrial intermembrane space [GO:0005758]; mitochondrial outer membrane [GO:0005741]; mitochondrial outer membrane translocase complex [GO:0005742]; pore complex [GO:0046930]; porin activity [GO:0015288]; protein channel activity [GO:0015266]; ion transport [GO:0006811]; protein import into mitochondrial matrix [GO:0030150]; protein targeting to mitochondrion [GO:000662…	cytosol [GO:0005829]; mitochondrial intermembrane space [GO:0005758]; mitochondrial outer membrane [GO:0005741]; mitochondrial outer membrane translocase complex [GO:0005742]; pore complex [GO:0046930]; porin activity [GO:0015288]; protein channel activity [GO:0015266]; ion transport [GO:0006811]; protein import into mitochondrial matrix [GO:0030150]; protein targeting to mitochondrion [GO:000662…
MPG1_YEAST	1.80878	0.405003	P41940	Mannose-1-phosphate guanyltransferase (EC 2.7.7.13) (ATP-mannose-1-phosphate guanylyltransferase) (GDP-mannose pyrophosphorylase) (NDP-hexose pyrophosphorylase)	PSA1 MPG1 SRB1 VIG9 YDL055C	cytoplasm [GO:0005737]; GTP binding [GO:0005525]; mannose-1-phosphate guanylyltransferase activity [GO:0004475]; cell cycle [GO:0007049]; cell wall mannoprotein biosynthetic process [GO:0000032]; GDP-mannose biosynthetic process [GO:0009298]; protein glycosylation [GO:0006486]	cytoplasm [GO:0005737]; GTP binding [GO:0005525]; mannose-1-phosphate guanylyltransferase activity [GO:0004475]; cell cycle [GO:0007049]; cell wall mannoprotein biosynthetic process [GO:0000032]; GDP-mannose biosynthetic process [GO:0009298]; protein glycosylation [GO:0006486]	cytoplasm [GO:0005737]; GTP binding [GO:0005525]; mannose-1-phosphate guanylyltransferase activity [GO:0004475]; cell cycle [GO:0007049]; cell wall mannoprotein biosynthetic process [GO:0000032]; GDP-mannose biosynthetic process [GO:0009298]; protein glycosylation [GO:0006486]	cytoplasm [GO:0005737]; GTP binding [GO:0005525]; mannose-1-phosphate guanylyltransferase activity [GO:0004475]; cell cycle [GO:0007049]; cell wall mannoprotein biosynthetic process [GO:0000032]; GDP-mannose biosynthetic process [GO:0009298]; protein glycosylation [GO:0006486]
IDI1_YEAST	2.01319	0.399783	P15496	Isopentenyl-diphosphate Delta-isomerase (EC 5.3.3.2) (Isopentenyl pyrophosphate isomerase) (IPP isomerase)	IDI1 BOT2 YPL117C LPH10C	cytoplasm [GO:0005737]; hydrolase activity [GO:0016787]; isopentenyl-diphosphate delta-isomerase activity [GO:0004452]; metal ion binding [GO:0046872]; dimethylallyl diphosphate biosynthetic process [GO:0050992]; farnesyl diphosphate biosynthetic process [GO:0045337]; isopentenyl diphosphate biosynthetic process [GO:0009240]; sterol biosynthetic process [GO:0016126]	cytoplasm [GO:0005737]; hydrolase activity [GO:0016787]; isopentenyl-diphosphate delta-isomerase activity [GO:0004452]; metal ion binding [GO:0046872]; dimethylallyl diphosphate biosynthetic process [GO:0050992]; farnesyl diphosphate biosynthetic process [GO:0045337]; isopentenyl diphosphate biosynthetic process [GO:0009240]; sterol biosynthetic process [GO:0016126]	cytoplasm [GO:0005737]; hydrolase activity [GO:0016787]; isopentenyl-diphosphate delta-isomerase activity [GO:0004452]; metal ion binding [GO:0046872]; dimethylallyl diphosphate biosynthetic process [GO:0050992]; farnesyl diphosphate biosynthetic process [GO:0045337]; isopentenyl diphosphate biosynthetic process [GO:0009240]; sterol biosynthetic process [GO:0016126]	cytoplasm [GO:0005737]; hydrolase activity [GO:0016787]; isopentenyl-diphosphate delta-isomerase activity [GO:0004452]; metal ion binding [GO:0046872]; dimethylallyl diphosphate biosynthetic process [GO:0050992]; farnesyl diphosphate biosynthetic process [GO:0045337]; isopentenyl diphosphate biosynthetic process [GO:0009240]; sterol biosynthetic process [GO:0016126]
ADH1_YEAST	2.13005	0.383926	P00330	Alcohol dehydrogenase 1 (EC 1.1.1.1) (Alcohol dehydrogenase I) (YADH-1)	ADH1 ADC1 YOL086C O0947	cytoplasm [GO:0005737]; alcohol dehydrogenase (NAD) activity [GO:0004022]; methylglyoxal reductase (NADH-dependent) activity [GO:0019170]; zinc ion binding [GO:0008270]; amino acid catabolic process to alcohol via Ehrlich pathway [GO:0000947]; ethanol biosynthetic process involved in glucose fermentation to ethanol [GO:0043458]; NADH oxidation [GO:0006116]	cytoplasm [GO:0005737]; alcohol dehydrogenase (NAD) activity [GO:0004022]; methylglyoxal reductase (NADH-dependent) activity [GO:0019170]; zinc ion binding [GO:0008270]; amino acid catabolic process to alcohol via Ehrlich pathway [GO:0000947]; ethanol biosynthetic process involved in glucose fermentation to ethanol [GO:0043458]; NADH oxidation [GO:0006116]	cytoplasm [GO:0005737]; alcohol dehydrogenase (NAD) activity [GO:0004022]; methylglyoxal reductase (NADH-dependent) activity [GO:0019170]; zinc ion binding [GO:0008270]; amino acid catabolic process to alcohol via Ehrlich pathway [GO:0000947]; ethanol biosynthetic process involved in glucose fermentation to ethanol [GO:0043458]; NADH oxidation [GO:0006116]	cytoplasm [GO:0005737]; alcohol dehydrogenase (NAD) activity [GO:0004022]; methylglyoxal reductase (NADH-dependent) activity [GO:0019170]; zinc ion binding [GO:0008270]; amino acid catabolic process to alcohol via Ehrlich pathway [GO:0000947]; ethanol biosynthetic process involved in glucose fermentation to ethanol [GO:0043458]; NADH oxidation [GO:0006116]
RL18B_YEAST	2.09757	0.374131	P0CX50	60S ribosomal protein L18-B (Large ribosomal subunit protein eL18-B) (RP28)	RPL18B RP28B YNL301C N0425	cytosolic large ribosomal subunit [GO:0022625]; structural constituent of ribosome [GO:0003735]; cytoplasmic translation [GO:0002181]	cytosolic large ribosomal subunit [GO:0022625]; structural constituent of ribosome [GO:0003735]; cytoplasmic translation [GO:0002181]	cytosolic large ribosomal subunit [GO:0022625]; structural constituent of ribosome [GO:0003735]; cytoplasmic translation [GO:0002181]	cytosolic large ribosomal subunit [GO:0022625]; structural constituent of ribosome [GO:0003735]; cytoplasmic translation [GO:0002181]
PUR6_YEAST	2.13779	0.373885	P21264	Phosphoribosylaminoimidazole carboxylase (EC 4.1.1.21) (AIR carboxylase) (AIRC)	ADE2 YOR128C O3293 YOR3293C	ATP binding [GO:0005524]; metal ion binding [GO:0046872]; phosphoribosylaminoimidazole carboxylase activity [GO:0004638]; 'de novo' IMP biosynthetic process [GO:0006189]; purine nucleobase metabolic process [GO:0006144]; purine nucleotide biosynthetic process [GO:0006164]	ATP binding [GO:0005524]; metal ion binding [GO:0046872]; phosphoribosylaminoimidazole carboxylase activity [GO:0004638]; 'de novo' IMP biosynthetic process [GO:0006189]; purine nucleobase metabolic process [GO:0006144]; purine nucleotide biosynthetic process [GO:0006164]	ATP binding [GO:0005524]; metal ion binding [GO:0046872]; phosphoribosylaminoimidazole carboxylase activity [GO:0004638]; 'de novo' IMP biosynthetic process [GO:0006189]; purine nucleobase metabolic process [GO:0006144]; purine nucleotide biosynthetic process [GO:0006164]	ATP binding [GO:0005524]; metal ion binding [GO:0046872]; phosphoribosylaminoimidazole carboxylase activity [GO:0004638]; 'de novo' IMP biosynthetic process [GO:0006189]; purine nucleobase metabolic process [GO:0006144]; purine nucleotide biosynthetic process [GO:0006164]
RL21A_YEAST	2.15171	0.373806	Q02753	60S ribosomal protein L21-A (Large ribosomal subunit protein eL21-A)	RPL21A URP1 YBR191W YBR1401	cytosolic large ribosomal subunit [GO:0022625]; structural constituent of ribosome [GO:0003735]; cytoplasmic translation [GO:0002181]; translation [GO:0006412]	cytosolic large ribosomal subunit [GO:0022625]; structural constituent of ribosome [GO:0003735]; cytoplasmic translation [GO:0002181]; translation [GO:0006412]	cytosolic large ribosomal subunit [GO:0022625]; structural constituent of ribosome [GO:0003735]; cytoplasmic translation [GO:0002181]; translation [GO:0006412]	cytosolic large ribosomal subunit [GO:0022625]; structural constituent of ribosome [GO:0003735]; cytoplasmic translation [GO:0002181]; translation [GO:0006412]
RL2B_YEAST	2.01825	0.364822	P0CX46	60S ribosomal protein L2-B (L5) (Large ribosomal subunit protein uL2-B) (RP8) (YL6)	RPL2B RPL5A YIL018W	cytosolic large ribosomal subunit [GO:0022625]; rRNA binding [GO:0019843]; structural constituent of ribosome [GO:0003735]; cytoplasmic translation [GO:0002181]	cytosolic large ribosomal subunit [GO:0022625]; rRNA binding [GO:0019843]; structural constituent of ribosome [GO:0003735]; cytoplasmic translation [GO:0002181]	cytosolic large ribosomal subunit [GO:0022625]; rRNA binding [GO:0019843]; structural constituent of ribosome [GO:0003735]; cytoplasmic translation [GO:0002181]	cytosolic large ribosomal subunit [GO:0022625]; rRNA binding [GO:0019843]; structural constituent of ribosome [GO:0003735]; cytoplasmic translation [GO:0002181]
GVP36_YEAST	2.96268	0.354111	P40531	Protein GVP36 (36 kDa Golgi vesicle protein)	GVP36 YIL041W	integral component of Golgi membrane [GO:0030173]; endocytosis [GO:0006897]; establishment or maintenance of actin cytoskeleton polarity [GO:0030950]; vacuole organization [GO:0007033]	integral component of Golgi membrane [GO:0030173]; endocytosis [GO:0006897]; establishment or maintenance of actin cytoskeleton polarity [GO:0030950]; vacuole organization [GO:0007033]	integral component of Golgi membrane [GO:0030173]; endocytosis [GO:0006897]; establishment or maintenance of actin cytoskeleton polarity [GO:0030950]; vacuole organization [GO:0007033]	integral component of Golgi membrane [GO:0030173]; endocytosis [GO:0006897]; establishment or maintenance of actin cytoskeleton polarity [GO:0030950]; vacuole organization [GO:0007033]
ODPB_YEAST	2.40518	0.350591	P32473	Pyruvate dehydrogenase E1 component subunit beta, mitochondrial (EC 1.2.4.1) (Pyruvate dehydrogenase complex component E1 beta) (PDHE1-B)	PDB1 YBR221C YBR1511	mitochondrial nucleoid [GO:0042645]; mitochondrial pyruvate dehydrogenase complex [GO:0005967]; mitochondrion [GO:0005739]; pyruvate dehydrogenase (acetyl-transferring) activity [GO:0004739]; acetyl-CoA biosynthetic process from pyruvate [GO:0006086]; glycolytic process [GO:0006096]	mitochondrial nucleoid [GO:0042645]; mitochondrial pyruvate dehydrogenase complex [GO:0005967]; mitochondrion [GO:0005739]; pyruvate dehydrogenase (acetyl-transferring) activity [GO:0004739]; acetyl-CoA biosynthetic process from pyruvate [GO:0006086]; glycolytic process [GO:0006096]	mitochondrial nucleoid [GO:0042645]; mitochondrial pyruvate dehydrogenase complex [GO:0005967]; mitochondrion [GO:0005739]; pyruvate dehydrogenase (acetyl-transferring) activity [GO:0004739]; acetyl-CoA biosynthetic process from pyruvate [GO:0006086]; glycolytic process [GO:0006096]	mitochondrial nucleoid [GO:0042645]; mitochondrial pyruvate dehydrogenase complex [GO:0005967]; mitochondrion [GO:0005739]; pyruvate dehydrogenase (acetyl-transferring) activity [GO:0004739]; acetyl-CoA biosynthetic process from pyruvate [GO:0006086]; glycolytic process [GO:0006096]
HOSM_YEAST	2.74923	0.350523	Q12122	Homocitrate synthase, mitochondrial (EC 2.3.3.14)	LYS21 YDL131W D2195	mitochondrion [GO:0005739]; nucleus [GO:0005634]; homocitrate synthase activity [GO:0004410]; lysine biosynthetic process via aminoadipic acid [GO:0019878]	mitochondrion [GO:0005739]; nucleus [GO:0005634]; homocitrate synthase activity [GO:0004410]; lysine biosynthetic process via aminoadipic acid [GO:0019878]	mitochondrion [GO:0005739]; nucleus [GO:0005634]; homocitrate synthase activity [GO:0004410]; lysine biosynthetic process via aminoadipic acid [GO:0019878]	mitochondrion [GO:0005739]; nucleus [GO:0005634]; homocitrate synthase activity [GO:0004410]; lysine biosynthetic process via aminoadipic acid [GO:0019878]
RL27A_YEAST	2.15705	0.346046	P0C2H6	60S ribosomal protein L27-A (Large ribosomal subunit protein eL27-A)	RPL27A RPL27 YHR010W	cytosolic large ribosomal subunit [GO:0022625]; structural constituent of ribosome [GO:0003735]; cytoplasmic translation [GO:0002181]	cytosolic large ribosomal subunit [GO:0022625]; structural constituent of ribosome [GO:0003735]; cytoplasmic translation [GO:0002181]	cytosolic large ribosomal subunit [GO:0022625]; structural constituent of ribosome [GO:0003735]; cytoplasmic translation [GO:0002181]	cytosolic large ribosomal subunit [GO:0022625]; structural constituent of ribosome [GO:0003735]; cytoplasmic translation [GO:0002181]
AROG_YEAST	2.13317	0.342313	P32449	Phospho-2-dehydro-3-deoxyheptonate aldolase, tyrosine-inhibited (EC 2.5.1.54) (3-deoxy-D-arabino-heptulosonate 7-phosphate synthase) (DAHP synthase) (Phospho-2-keto-3-deoxyheptonate aldolase)	ARO4 YBR249C YBR1701	3-deoxy-7-phosphoheptulonate synthase activity [GO:0003849]; aromatic amino acid family biosynthetic process [GO:0009073]; chorismate biosynthetic process [GO:0009423]	3-deoxy-7-phosphoheptulonate synthase activity [GO:0003849]; aromatic amino acid family biosynthetic process [GO:0009073]; chorismate biosynthetic process [GO:0009423]	3-deoxy-7-phosphoheptulonate synthase activity [GO:0003849]; aromatic amino acid family biosynthetic process [GO:0009073]; chorismate biosynthetic process [GO:0009423]	3-deoxy-7-phosphoheptulonate synthase activity [GO:0003849]; aromatic amino acid family biosynthetic process [GO:0009073]; chorismate biosynthetic process [GO:0009423]
GPP1_YEAST	4.64242	0.339275	P41277	Glycerol-1-phosphate phosphohydrolase 1 (EC 3.1.3.21) ((DL)-glycerol-3-phosphatase 1) (Related to HOR2 protein 2)	GPP1 RHR2 YIL053W	cytoplasm [GO:0005737]; nucleus [GO:0005634]; glycerol-1-phosphatase activity [GO:0000121]; metal ion binding [GO:0046872]; glycerol biosynthetic process [GO:0006114]; response to osmotic stress [GO:0006970]	cytoplasm [GO:0005737]; nucleus [GO:0005634]; glycerol-1-phosphatase activity [GO:0000121]; metal ion binding [GO:0046872]; glycerol biosynthetic process [GO:0006114]; response to osmotic stress [GO:0006970]	cytoplasm [GO:0005737]; nucleus [GO:0005634]; glycerol-1-phosphatase activity [GO:0000121]; metal ion binding [GO:0046872]; glycerol biosynthetic process [GO:0006114]; response to osmotic stress [GO:0006970]	cytoplasm [GO:0005737]; nucleus [GO:0005634]; glycerol-1-phosphatase activity [GO:0000121]; metal ion binding [GO:0046872]; glycerol biosynthetic process [GO:0006114]; response to osmotic stress [GO:0006970]
RL13B_YEAST	5.43289	0.33925	P40212	60S ribosomal protein L13-B (Large ribosomal subunit protein eL13-B)	RPL13B RPL13 YMR142C YM9375.11C	cytosolic large ribosomal subunit [GO:0022625]; RNA binding [GO:0003723]; structural constituent of ribosome [GO:0003735]; cytoplasmic translation [GO:0002181]; macroautophagy [GO:0016236]; translation [GO:0006412]	cytosolic large ribosomal subunit [GO:0022625]; RNA binding [GO:0003723]; structural constituent of ribosome [GO:0003735]; cytoplasmic translation [GO:0002181]; macroautophagy [GO:0016236]; translation [GO:0006412]	cytosolic large ribosomal subunit [GO:0022625]; RNA binding [GO:0003723]; structural constituent of ribosome [GO:0003735]; cytoplasmic translation [GO:0002181]; macroautophagy [GO:0016236]; translation [GO:0006412]	cytosolic large ribosomal subunit [GO:0022625]; RNA binding [GO:0003723]; structural constituent of ribosome [GO:0003735]; cytoplasmic translation [GO:0002181]; macroautophagy [GO:0016236]; translation [GO:0006412]
RS13_YEAST	2.17502	0.333185	P05756	40S ribosomal protein S13 (S27a) (Small ribosomal subunit protein uS15) (YS15)	RPS13 RPS13C YDR064W D4252 YD9609.18	cytosolic small ribosomal subunit [GO:0022627]; nucleolus [GO:0005730]; small ribosomal subunit rRNA binding [GO:0070181]; structural constituent of ribosome [GO:0003735]; cytoplasmic translation [GO:0002181]; maturation of SSU-rRNA from tricistronic rRNA transcript (SSU-rRNA, 5.8S rRNA, LSU-rRNA) [GO:0000462]; translation [GO:0006412]	cytosolic small ribosomal subunit [GO:0022627]; nucleolus [GO:0005730]; small ribosomal subunit rRNA binding [GO:0070181]; structural constituent of ribosome [GO:0003735]; cytoplasmic translation [GO:0002181]; maturation of SSU-rRNA from tricistronic rRNA transcript (SSU-rRNA, 5.8S rRNA, LSU-rRNA) [GO:0000462]; translation [GO:0006412]	cytosolic small ribosomal subunit [GO:0022627]; nucleolus [GO:0005730]; small ribosomal subunit rRNA binding [GO:0070181]; structural constituent of ribosome [GO:0003735]; cytoplasmic translation [GO:0002181]; maturation of SSU-rRNA from tricistronic rRNA transcript (SSU-rRNA, 5.8S rRNA, LSU-rRNA) [GO:0000462]; translation [GO:0006412]	cytosolic small ribosomal subunit [GO:0022627]; nucleolus [GO:0005730]; small ribosomal subunit rRNA binding [GO:0070181]; structural constituent of ribosome [GO:0003735]; cytoplasmic translation [GO:0002181]; maturation of SSU-rRNA from tricistronic rRNA transcript (SSU-rRNA, 5.8S rRNA, LSU-rRNA) [GO:0000462]; translation [GO:0006412]
RS25A_YEAST	2.49645	0.299644	Q3E792	40S ribosomal protein S25-A (RP45) (S31) (Small ribosomal subunit protein eS25-A) (YS23)	RPS25A RPS31A YGR027C	cytosolic small ribosomal subunit [GO:0022627]; structural constituent of ribosome [GO:0003735]; cytoplasmic translation [GO:0002181]	cytosolic small ribosomal subunit [GO:0022627]; structural constituent of ribosome [GO:0003735]; cytoplasmic translation [GO:0002181]	cytosolic small ribosomal subunit [GO:0022627]; structural constituent of ribosome [GO:0003735]; cytoplasmic translation [GO:0002181]	cytosolic small ribosomal subunit [GO:0022627]; structural constituent of ribosome [GO:0003735]; cytoplasmic translation [GO:0002181]
RL8B_YEAST	2.59428	0.288204	P29453	60S ribosomal protein L8-B (L4) (L4-1) (Large ribosomal subunit protein eL8-B) (RP6) (YL5)	RPL8B KRB1 RPL4B YLL045C	cytosolic large ribosomal subunit [GO:0022625]; RNA binding [GO:0003723]; structural constituent of ribosome [GO:0003735]; cytoplasmic translation [GO:0002181]; maturation of LSU-rRNA [GO:0000470]; translation [GO:0006412]	cytosolic large ribosomal subunit [GO:0022625]; RNA binding [GO:0003723]; structural constituent of ribosome [GO:0003735]; cytoplasmic translation [GO:0002181]; maturation of LSU-rRNA [GO:0000470]; translation [GO:0006412]	cytosolic large ribosomal subunit [GO:0022625]; RNA binding [GO:0003723]; structural constituent of ribosome [GO:0003735]; cytoplasmic translation [GO:0002181]; maturation of LSU-rRNA [GO:0000470]; translation [GO:0006412]	cytosolic large ribosomal subunit [GO:0022625]; RNA binding [GO:0003723]; structural constituent of ribosome [GO:0003735]; cytoplasmic translation [GO:0002181]; maturation of LSU-rRNA [GO:0000470]; translation [GO:0006412]
ACEA_YEAST	3.097	-0.328628	P28240	Isocitrate lyase (ICL) (EC 4.1.3.1) (Methylisocitrate lyase) (MICA) (EC 4.1.3.30) (Threo-D(S)-isocitrate glyoxylate-lyase)	ICL1 YER065C	cytoplasm [GO:0005737]; glyoxysome [GO:0009514]; proteinaceous extracellular matrix [GO:0005578]; vacuole [GO:0005773]; isocitrate lyase activity [GO:0004451]; metal ion binding [GO:0046872]; methylisocitrate lyase activity [GO:0046421]; glyoxylate cycle [GO:0006097]; tricarboxylic acid cycle [GO:0006099]	cytoplasm [GO:0005737]; glyoxysome [GO:0009514]; proteinaceous extracellular matrix [GO:0005578]; vacuole [GO:0005773]; isocitrate lyase activity [GO:0004451]; metal ion binding [GO:0046872]; methylisocitrate lyase activity [GO:0046421]; glyoxylate cycle [GO:0006097]; tricarboxylic acid cycle [GO:0006099]	cytoplasm [GO:0005737]; glyoxysome [GO:0009514]; proteinaceous extracellular matrix [GO:0005578]; vacuole [GO:0005773]; isocitrate lyase activity [GO:0004451]; metal ion binding [GO:0046872]; methylisocitrate lyase activity [GO:0046421]; glyoxylate cycle [GO:0006097]; tricarboxylic acid cycle [GO:0006099]	cytoplasm [GO:0005737]; glyoxysome [GO:0009514]; proteinaceous extracellular matrix [GO:0005578]; vacuole [GO:0005773]; isocitrate lyase activity [GO:0004451]; metal ion binding [GO:0046872]; methylisocitrate lyase activity [GO:0046421]; glyoxylate cycle [GO:0006097]; tricarboxylic acid cycle [GO:0006099]
TOM70_YEAST	1.96538	-0.436934	P07213	Mitochondrial import receptor subunit TOM70 (70 kDa mitochondrial outer membrane protein) (Translocase of outer membrane 70 kDa subunit)	TOM70 MAS70 OMP1 YNL121C N1905	integral component of mitochondrial outer membrane [GO:0031307]; mitochondrial outer membrane [GO:0005741]; mitochondrial outer membrane translocase complex [GO:0005742]; mitochondrion [GO:0005739]; mitochondrion targeting sequence binding [GO:0030943]; P-P-bond-hydrolysis-driven protein transmembrane transporter activity [GO:0015450]; protein import into mitochondrial inner membrane [GO:0045039]…	integral component of mitochondrial outer membrane [GO:0031307]; mitochondrial outer membrane [GO:0005741]; mitochondrial outer membrane translocase complex [GO:0005742]; mitochondrion [GO:0005739]; mitochondrion targeting sequence binding [GO:0030943]; P-P-bond-hydrolysis-driven protein transmembrane transporter activity [GO:0015450]; protein import into mitochondrial inner membrane [GO:0045039]…	integral component of mitochondrial outer membrane [GO:0031307]; mitochondrial outer membrane [GO:0005741]; mitochondrial outer membrane translocase complex [GO:0005742]; mitochondrion [GO:0005739]; mitochondrion targeting sequence binding [GO:0030943]; P-P-bond-hydrolysis-driven protein transmembrane transporter activity [GO:0015450]; protein import into mitochondrial inner membrane [GO:0045039]…	integral component of mitochondrial outer membrane [GO:0031307]; mitochondrial outer membrane [GO:0005741]; mitochondrial outer membrane translocase complex [GO:0005742]; mitochondrion [GO:0005739]; mitochondrion targeting sequence binding [GO:0030943]; P-P-bond-hydrolysis-driven protein transmembrane transporter activity [GO:0015450]; protein import into mitochondrial inner membrane [GO:0045039]…
YKR18_YEAST	2.28799	-0.441624	P36114	Mitochondrial outer membrane protein YKR018C	YKR018C	integral component of membrane [GO:0016021]; mitochondrial outer membrane [GO:0005741]	integral component of membrane [GO:0016021]; mitochondrial outer membrane [GO:0005741]	integral component of membrane [GO:0016021]; mitochondrial outer membrane [GO:0005741]	integral component of membrane [GO:0016021]; mitochondrial outer membrane [GO:0005741]
RPN1_YEAST	2.01173	-0.453698	P38764	26S proteasome regulatory subunit RPN1 (HMG-CoA reductase degradation protein 2) (Proteasome non-ATPase subunit 1)	RPN1 HRD2 NAS1 RPD1 YHR027C	nucleus [GO:0005634]; proteasome regulatory particle, base subcomplex [GO:0008540]; proteasome storage granule [GO:0034515]; enzyme regulator activity [GO:0030234]; protein binding, bridging [GO:0030674]; regulation of protein catabolic process [GO:0042176]; ubiquitin-dependent protein catabolic process [GO:0006511]	nucleus [GO:0005634]; proteasome regulatory particle, base subcomplex [GO:0008540]; proteasome storage granule [GO:0034515]; enzyme regulator activity [GO:0030234]; protein binding, bridging [GO:0030674]; regulation of protein catabolic process [GO:0042176]; ubiquitin-dependent protein catabolic process [GO:0006511]	nucleus [GO:0005634]; proteasome regulatory particle, base subcomplex [GO:0008540]; proteasome storage granule [GO:0034515]; enzyme regulator activity [GO:0030234]; protein binding, bridging [GO:0030674]; regulation of protein catabolic process [GO:0042176]; ubiquitin-dependent protein catabolic process [GO:0006511]	nucleus [GO:0005634]; proteasome regulatory particle, base subcomplex [GO:0008540]; proteasome storage granule [GO:0034515]; enzyme regulator activity [GO:0030234]; protein binding, bridging [GO:0030674]; regulation of protein catabolic process [GO:0042176]; ubiquitin-dependent protein catabolic process [GO:0006511]
FAT2_YEAST	2.12982	-0.460147	P38137	Peroxisomal-coenzyme A synthetase (EC 6.-.-.-)	PCS60 FAT2 YBR222C YBR1512	peroxisomal matrix [GO:0005782]; peroxisomal membrane [GO:0005778]; identical protein binding [GO:0042802]; mRNA binding [GO:0003729]; oxalate-CoA ligase activity [GO:0050203]; defense response to fungus [GO:0050832]; oxalate catabolic process [GO:0033611]; positive regulation of seed germination [GO:0010030]; response to cadmium ion [GO:0046686]; response to cytokinin [GO:0009735]	peroxisomal matrix [GO:0005782]; peroxisomal membrane [GO:0005778]; identical protein binding [GO:0042802]; mRNA binding [GO:0003729]; oxalate-CoA ligase activity [GO:0050203]; defense response to fungus [GO:0050832]; oxalate catabolic process [GO:0033611]; positive regulation of seed germination [GO:0010030]; response to cadmium ion [GO:0046686]; response to cytokinin [GO:0009735]	peroxisomal matrix [GO:0005782]; peroxisomal membrane [GO:0005778]; identical protein binding [GO:0042802]; mRNA binding [GO:0003729]; oxalate-CoA ligase activity [GO:0050203]; defense response to fungus [GO:0050832]; oxalate catabolic process [GO:0033611]; positive regulation of seed germination [GO:0010030]; response to cadmium ion [GO:0046686]; response to cytokinin [GO:0009735]	peroxisomal matrix [GO:0005782]; peroxisomal membrane [GO:0005778]; identical protein binding [GO:0042802]; mRNA binding [GO:0003729]; oxalate-CoA ligase activity [GO:0050203]; defense response to fungus [GO:0050832]; oxalate catabolic process [GO:0033611]; positive regulation of seed germination [GO:0010030]; response to cadmium ion [GO:0046686]; response to cytokinin [GO:0009735]
HFD1_YEAST	2.20255	-0.460346	Q04458	Fatty aldehyde dehydrogenase HFD1 (EC 1.2.1.3)	HFD1 YMR110C YM9718.09C	endosome membrane [GO:0010008]; integral component of mitochondrial outer membrane [GO:0031307]; lipid particle [GO:0005811]; 3-chloroallyl aldehyde dehydrogenase activity [GO:0004028]; 4-hydroxybenzaldehyde dehydrogenase activity [GO:0018484]; aldehyde dehydrogenase [NAD(P)+] activity [GO:0004030]; carboxylate reductase activity [GO:0047770]; aldehyde catabolic process [GO:0046185]; cellular ald…	endosome membrane [GO:0010008]; integral component of mitochondrial outer membrane [GO:0031307]; lipid particle [GO:0005811]; 3-chloroallyl aldehyde dehydrogenase activity [GO:0004028]; 4-hydroxybenzaldehyde dehydrogenase activity [GO:0018484]; aldehyde dehydrogenase [NAD(P)+] activity [GO:0004030]; carboxylate reductase activity [GO:0047770]; aldehyde catabolic process [GO:0046185]; cellular ald…	endosome membrane [GO:0010008]; integral component of mitochondrial outer membrane [GO:0031307]; lipid particle [GO:0005811]; 3-chloroallyl aldehyde dehydrogenase activity [GO:0004028]; 4-hydroxybenzaldehyde dehydrogenase activity [GO:0018484]; aldehyde dehydrogenase [NAD(P)+] activity [GO:0004030]; carboxylate reductase activity [GO:0047770]; aldehyde catabolic process [GO:0046185]; cellular ald…	endosome membrane [GO:0010008]; integral component of mitochondrial outer membrane [GO:0031307]; lipid particle [GO:0005811]; 3-chloroallyl aldehyde dehydrogenase activity [GO:0004028]; 4-hydroxybenzaldehyde dehydrogenase activity [GO:0018484]; aldehyde dehydrogenase [NAD(P)+] activity [GO:0004030]; carboxylate reductase activity [GO:0047770]; aldehyde catabolic process [GO:0046185]; cellular ald…
SPG4_YEAST	3.11953	-0.467163	Q04438	Stationary phase protein 4	SPG4 YMR107W YM9718.06
UBP6_YEAST	2.03414	-0.470432	P43593	Ubiquitin carboxyl-terminal hydrolase 6 (EC 3.4.19.12) (Deubiquitinating enzyme 6) (Ubiquitin thioesterase 6) (Ubiquitin-specific-processing protease 6)	UBP6 YFR010W	proteasome complex [GO:0000502]; proteasome regulatory particle [GO:0005838]; thiol-dependent ubiquitin-specific protease activity [GO:0004843]; mitochondria-associated ubiquitin-dependent protein catabolic process [GO:0072671]; negative regulation of proteasomal protein catabolic process [GO:1901799]; protein deubiquitination [GO:0016579]; regulation of proteasomal ubiquitin-dependent protein ca…	proteasome complex [GO:0000502]; proteasome regulatory particle [GO:0005838]; thiol-dependent ubiquitin-specific protease activity [GO:0004843]; mitochondria-associated ubiquitin-dependent protein catabolic process [GO:0072671]; negative regulation of proteasomal protein catabolic process [GO:1901799]; protein deubiquitination [GO:0016579]; regulation of proteasomal ubiquitin-dependent protein ca…	proteasome complex [GO:0000502]; proteasome regulatory particle [GO:0005838]; thiol-dependent ubiquitin-specific protease activity [GO:0004843]; mitochondria-associated ubiquitin-dependent protein catabolic process [GO:0072671]; negative regulation of proteasomal protein catabolic process [GO:1901799]; protein deubiquitination [GO:0016579]; regulation of proteasomal ubiquitin-dependent protein ca…	proteasome complex [GO:0000502]; proteasome regulatory particle [GO:0005838]; thiol-dependent ubiquitin-specific protease activity [GO:0004843]; mitochondria-associated ubiquitin-dependent protein catabolic process [GO:0072671]; negative regulation of proteasomal protein catabolic process [GO:1901799]; protein deubiquitination [GO:0016579]; regulation of proteasomal ubiquitin-dependent protein ca…
HRP1_YEAST	1.88261	-0.478962	Q99383	Nuclear polyadenylated RNA-binding protein 4 (Cleavage factor IB) (CFIB)	HRP1 NAB4 NAB5 YOL123W	cytoplasm [GO:0005737]; cytoplasmic stress granule [GO:0010494]; mRNA cleavage factor complex [GO:0005849]; nucleus [GO:0005634]; mRNA binding [GO:0003729]; RNA binding [GO:0003723]; mRNA polyadenylation [GO:0006378]; nuclear-transcribed mRNA catabolic process, nonsense-mediated decay [GO:0000184]; pre-mRNA cleavage required for polyadenylation [GO:0098789]; response to DNA damage checkpoint sign…	cytoplasm [GO:0005737]; cytoplasmic stress granule [GO:0010494]; mRNA cleavage factor complex [GO:0005849]; nucleus [GO:0005634]; mRNA binding [GO:0003729]; RNA binding [GO:0003723]; mRNA polyadenylation [GO:0006378]; nuclear-transcribed mRNA catabolic process, nonsense-mediated decay [GO:0000184]; pre-mRNA cleavage required for polyadenylation [GO:0098789]; response to DNA damage checkpoint sign…	cytoplasm [GO:0005737]; cytoplasmic stress granule [GO:0010494]; mRNA cleavage factor complex [GO:0005849]; nucleus [GO:0005634]; mRNA binding [GO:0003729]; RNA binding [GO:0003723]; mRNA polyadenylation [GO:0006378]; nuclear-transcribed mRNA catabolic process, nonsense-mediated decay [GO:0000184]; pre-mRNA cleavage required for polyadenylation [GO:0098789]; response to DNA damage checkpoint sign…	cytoplasm [GO:0005737]; cytoplasmic stress granule [GO:0010494]; mRNA cleavage factor complex [GO:0005849]; nucleus [GO:0005634]; mRNA binding [GO:0003729]; RNA binding [GO:0003723]; mRNA polyadenylation [GO:0006378]; nuclear-transcribed mRNA catabolic process, nonsense-mediated decay [GO:0000184]; pre-mRNA cleavage required for polyadenylation [GO:0098789]; response to DNA damage checkpoint sign…
RNQ1_YEAST	2.15022	-0.481837	P25367	[PIN+] prion protein RNQ1 (Rich in asparagine and glutamine protein 1)	RNQ1 YCL028W YCL181 YCL28W	cytosol [GO:0005829]; nucleus [GO:0005634]	cytosol [GO:0005829]; nucleus [GO:0005634]	cytosol [GO:0005829]; nucleus [GO:0005634]	cytosol [GO:0005829]; nucleus [GO:0005634]
KES1_YEAST	1.87413	-0.484354	P35844	Oxysterol-binding protein homolog 4 (Protein KES1)	KES1 OSH4 YPL145C LPI3C P2614	cytoplasm [GO:0005737]; extrinsic component of membrane [GO:0019898]; Golgi membrane [GO:0000139]; lipid binding [GO:0008289]; oxysterol binding [GO:0008142]; phosphatidic acid binding [GO:0070300]; phosphatidylinositol-4,5-bisphosphate binding [GO:0005546]; phosphatidylinositol-4-phosphate binding [GO:0070273]; sterol transporter activity [GO:0015248]; endocytosis [GO:0006897]; ER to Golgi ceram…	cytoplasm [GO:0005737]; extrinsic component of membrane [GO:0019898]; Golgi membrane [GO:0000139]; lipid binding [GO:0008289]; oxysterol binding [GO:0008142]; phosphatidic acid binding [GO:0070300]; phosphatidylinositol-4,5-bisphosphate binding [GO:0005546]; phosphatidylinositol-4-phosphate binding [GO:0070273]; sterol transporter activity [GO:0015248]; endocytosis [GO:0006897]; ER to Golgi ceram…	cytoplasm [GO:0005737]; extrinsic component of membrane [GO:0019898]; Golgi membrane [GO:0000139]; lipid binding [GO:0008289]; oxysterol binding [GO:0008142]; phosphatidic acid binding [GO:0070300]; phosphatidylinositol-4,5-bisphosphate binding [GO:0005546]; phosphatidylinositol-4-phosphate binding [GO:0070273]; sterol transporter activity [GO:0015248]; endocytosis [GO:0006897]; ER to Golgi ceram…	cytoplasm [GO:0005737]; extrinsic component of membrane [GO:0019898]; Golgi membrane [GO:0000139]; lipid binding [GO:0008289]; oxysterol binding [GO:0008142]; phosphatidic acid binding [GO:0070300]; phosphatidylinositol-4,5-bisphosphate binding [GO:0005546]; phosphatidylinositol-4-phosphate binding [GO:0070273]; sterol transporter activity [GO:0015248]; endocytosis [GO:0006897]; ER to Golgi ceram…
ODPX_YEAST	1.97181	-0.484472	P16451	Pyruvate dehydrogenase complex protein X component, mitochondrial (Dihydrolipoamide dehydrogenase-binding protein of pyruvate dehydrogenase complex) (E3-binding protein) (Pyruvate dehydrogenase complex component E3BP)	PDX1 YGR193C G7579	mitochondrial pyruvate dehydrogenase complex [GO:0005967]; structural molecule activity [GO:0005198]; transferase activity, transferring acyl groups [GO:0016746]; acetyl-CoA biosynthetic process from pyruvate [GO:0006086]	mitochondrial pyruvate dehydrogenase complex [GO:0005967]; structural molecule activity [GO:0005198]; transferase activity, transferring acyl groups [GO:0016746]; acetyl-CoA biosynthetic process from pyruvate [GO:0006086]	mitochondrial pyruvate dehydrogenase complex [GO:0005967]; structural molecule activity [GO:0005198]; transferase activity, transferring acyl groups [GO:0016746]; acetyl-CoA biosynthetic process from pyruvate [GO:0006086]	mitochondrial pyruvate dehydrogenase complex [GO:0005967]; structural molecule activity [GO:0005198]; transferase activity, transferring acyl groups [GO:0016746]; acetyl-CoA biosynthetic process from pyruvate [GO:0006086]
ARGD_YEAST	1.70816	-0.484577	P18544	Acetylornithine aminotransferase, mitochondrial (ACOAT) (EC 2.6.1.11)	ARG8 YOL140W	mitochondrial matrix [GO:0005759]; copper ion binding [GO:0005507]; identical protein binding [GO:0042802]; N2-acetyl-L-ornithine:2-oxoglutarate 5-aminotransferase activity [GO:0003992]; pyridoxal phosphate binding [GO:0030170]; arginine biosynthetic process [GO:0006526]; defense response to bacterium [GO:0042742]; interspecies interaction between organisms [GO:0044419]; ornithine biosynthetic pr…	mitochondrial matrix [GO:0005759]; copper ion binding [GO:0005507]; identical protein binding [GO:0042802]; N2-acetyl-L-ornithine:2-oxoglutarate 5-aminotransferase activity [GO:0003992]; pyridoxal phosphate binding [GO:0030170]; arginine biosynthetic process [GO:0006526]; defense response to bacterium [GO:0042742]; interspecies interaction between organisms [GO:0044419]; ornithine biosynthetic pr…	mitochondrial matrix [GO:0005759]; copper ion binding [GO:0005507]; identical protein binding [GO:0042802]; N2-acetyl-L-ornithine:2-oxoglutarate 5-aminotransferase activity [GO:0003992]; pyridoxal phosphate binding [GO:0030170]; arginine biosynthetic process [GO:0006526]; defense response to bacterium [GO:0042742]; interspecies interaction between organisms [GO:0044419]; ornithine biosynthetic pr…	mitochondrial matrix [GO:0005759]; copper ion binding [GO:0005507]; identical protein binding [GO:0042802]; N2-acetyl-L-ornithine:2-oxoglutarate 5-aminotransferase activity [GO:0003992]; pyridoxal phosphate binding [GO:0030170]; arginine biosynthetic process [GO:0006526]; defense response to bacterium [GO:0042742]; interspecies interaction between organisms [GO:0044419]; ornithine biosynthetic pr…
YPT7_YEAST	2.07886	-0.493251	P32939	GTP-binding protein YPT7	YPT7 VAM4 YML001W YM8270.02	cytosol [GO:0005829]; fungal-type vacuole [GO:0000324]; fungal-type vacuole membrane [GO:0000329]; vacuole-mitochondrion membrane contact site [GO:1990816]; GTP binding [GO:0005525]; GTPase activity [GO:0003924]; CVT pathway [GO:0032258]; endocytosis [GO:0006897]; macroautophagy [GO:0016236]; piecemeal microautophagy of nucleus [GO:0034727]; protein localization to vacuole [GO:0072665]; regulatio…	cytosol [GO:0005829]; fungal-type vacuole [GO:0000324]; fungal-type vacuole membrane [GO:0000329]; vacuole-mitochondrion membrane contact site [GO:1990816]; GTP binding [GO:0005525]; GTPase activity [GO:0003924]; CVT pathway [GO:0032258]; endocytosis [GO:0006897]; macroautophagy [GO:0016236]; piecemeal microautophagy of nucleus [GO:0034727]; protein localization to vacuole [GO:0072665]; regulatio…	cytosol [GO:0005829]; fungal-type vacuole [GO:0000324]; fungal-type vacuole membrane [GO:0000329]; vacuole-mitochondrion membrane contact site [GO:1990816]; GTP binding [GO:0005525]; GTPase activity [GO:0003924]; CVT pathway [GO:0032258]; endocytosis [GO:0006897]; macroautophagy [GO:0016236]; piecemeal microautophagy of nucleus [GO:0034727]; protein localization to vacuole [GO:0072665]; regulatio…	cytosol [GO:0005829]; fungal-type vacuole [GO:0000324]; fungal-type vacuole membrane [GO:0000329]; vacuole-mitochondrion membrane contact site [GO:1990816]; GTP binding [GO:0005525]; GTPase activity [GO:0003924]; CVT pathway [GO:0032258]; endocytosis [GO:0006897]; macroautophagy [GO:0016236]; piecemeal microautophagy of nucleus [GO:0034727]; protein localization to vacuole [GO:0072665]; regulatio…
TRPE_YEAST	1.58416	-0.505646	P00899	Anthranilate synthase component 1 (EC 4.1.3.27) (Anthranilate synthase component I)	TRP2 YER090W	anthranilate synthase complex [GO:0005950]; anthranilate synthase activity [GO:0004049]; metal ion binding [GO:0046872]; tryptophan biosynthetic process [GO:0000162]	anthranilate synthase complex [GO:0005950]; anthranilate synthase activity [GO:0004049]; metal ion binding [GO:0046872]; tryptophan biosynthetic process [GO:0000162]	anthranilate synthase complex [GO:0005950]; anthranilate synthase activity [GO:0004049]; metal ion binding [GO:0046872]; tryptophan biosynthetic process [GO:0000162]	anthranilate synthase complex [GO:0005950]; anthranilate synthase activity [GO:0004049]; metal ion binding [GO:0046872]; tryptophan biosynthetic process [GO:0000162]
SYC_YEAST	1.55858	-0.5092	P53852	Cysteine--tRNA ligase (EC 6.1.1.16) (Cysteinyl-tRNA synthetase) (CysRS)	YNL247W N0885	ATP binding [GO:0005524]; cysteine-tRNA ligase activity [GO:0004817]; metal ion binding [GO:0046872]; cysteinyl-tRNA aminoacylation [GO:0006423]	ATP binding [GO:0005524]; cysteine-tRNA ligase activity [GO:0004817]; metal ion binding [GO:0046872]; cysteinyl-tRNA aminoacylation [GO:0006423]	ATP binding [GO:0005524]; cysteine-tRNA ligase activity [GO:0004817]; metal ion binding [GO:0046872]; cysteinyl-tRNA aminoacylation [GO:0006423]	ATP binding [GO:0005524]; cysteine-tRNA ligase activity [GO:0004817]; metal ion binding [GO:0046872]; cysteinyl-tRNA aminoacylation [GO:0006423]
HSP78_YEAST	2.37893	-0.522164	P33416	Heat shock protein 78, mitochondrial	HSP78 YDR258C YD9320A.08C	mitochondrial matrix [GO:0005759]; ATP binding [GO:0005524]; ATPase activity [GO:0016887]; misfolded protein binding [GO:0051787]; cellular response to heat [GO:0034605]; mitochondrial genome maintenance [GO:0000002]; protein refolding [GO:0042026]; protein stabilization [GO:0050821]; protein unfolding [GO:0043335]	mitochondrial matrix [GO:0005759]; ATP binding [GO:0005524]; ATPase activity [GO:0016887]; misfolded protein binding [GO:0051787]; cellular response to heat [GO:0034605]; mitochondrial genome maintenance [GO:0000002]; protein refolding [GO:0042026]; protein stabilization [GO:0050821]; protein unfolding [GO:0043335]	mitochondrial matrix [GO:0005759]; ATP binding [GO:0005524]; ATPase activity [GO:0016887]; misfolded protein binding [GO:0051787]; cellular response to heat [GO:0034605]; mitochondrial genome maintenance [GO:0000002]; protein refolding [GO:0042026]; protein stabilization [GO:0050821]; protein unfolding [GO:0043335]	mitochondrial matrix [GO:0005759]; ATP binding [GO:0005524]; ATPase activity [GO:0016887]; misfolded protein binding [GO:0051787]; cellular response to heat [GO:0034605]; mitochondrial genome maintenance [GO:0000002]; protein refolding [GO:0042026]; protein stabilization [GO:0050821]; protein unfolding [GO:0043335]
VPH1_YEAST	2.25807	-0.537193	P32563	V-type proton ATPase subunit a, vacuolar isoform (V-ATPase a 1 subunit) (V-ATPase 95 kDa subunit) (Vacuolar pH protein 1) (Vacuolar proton pump a subunit) (Vacuolar proton translocating ATPase subunit a 1)	VPH1 YOR270C	fungal-type vacuole [GO:0000324]; fungal-type vacuole membrane [GO:0000329]; integral component of membrane [GO:0016021]; vacuolar proton-transporting V-type ATPase, V0 domain [GO:0000220]; ATPase binding [GO:0051117]; proton-transporting ATPase activity, rotational mechanism [GO:0046961]; ATP hydrolysis coupled proton transport [GO:0015991]; ATP synthesis coupled proton transport [GO:0015986]; c…	fungal-type vacuole [GO:0000324]; fungal-type vacuole membrane [GO:0000329]; integral component of membrane [GO:0016021]; vacuolar proton-transporting V-type ATPase, V0 domain [GO:0000220]; ATPase binding [GO:0051117]; proton-transporting ATPase activity, rotational mechanism [GO:0046961]; ATP hydrolysis coupled proton transport [GO:0015991]; ATP synthesis coupled proton transport [GO:0015986]; c…	fungal-type vacuole [GO:0000324]; fungal-type vacuole membrane [GO:0000329]; integral component of membrane [GO:0016021]; vacuolar proton-transporting V-type ATPase, V0 domain [GO:0000220]; ATPase binding [GO:0051117]; proton-transporting ATPase activity, rotational mechanism [GO:0046961]; ATP hydrolysis coupled proton transport [GO:0015991]; ATP synthesis coupled proton transport [GO:0015986]; c…	fungal-type vacuole [GO:0000324]; fungal-type vacuole membrane [GO:0000329]; integral component of membrane [GO:0016021]; vacuolar proton-transporting V-type ATPase, V0 domain [GO:0000220]; ATPase binding [GO:0051117]; proton-transporting ATPase activity, rotational mechanism [GO:0046961]; ATP hydrolysis coupled proton transport [GO:0015991]; ATP synthesis coupled proton transport [GO:0015986]; c…
DHH1_YEAST	1.66647	-0.53797	P39517	ATP-dependent RNA helicase DHH1 (EC 3.6.4.13) (DExD/H-box helicase 1)	DHH1 YDL160C	cytoplasm [GO:0005737]; cytoplasmic side of membrane [GO:0098562]; cytoplasmic stress granule [GO:0010494]; P-body [GO:0000932]; ATP binding [GO:0005524]; ATP-dependent RNA helicase activity [GO:0004004]; chromatin binding [GO:0003682]; mRNA binding [GO:0003729]; translation regulator activity, nucleic acid binding [GO:0090079]; cytoplasmic mRNA processing body assembly [GO:0033962]; deadenylatio…	cytoplasm [GO:0005737]; cytoplasmic side of membrane [GO:0098562]; cytoplasmic stress granule [GO:0010494]; P-body [GO:0000932]; ATP binding [GO:0005524]; ATP-dependent RNA helicase activity [GO:0004004]; chromatin binding [GO:0003682]; mRNA binding [GO:0003729]; translation regulator activity, nucleic acid binding [GO:0090079]; cytoplasmic mRNA processing body assembly [GO:0033962]; deadenylatio…	cytoplasm [GO:0005737]; cytoplasmic side of membrane [GO:0098562]; cytoplasmic stress granule [GO:0010494]; P-body [GO:0000932]; ATP binding [GO:0005524]; ATP-dependent RNA helicase activity [GO:0004004]; chromatin binding [GO:0003682]; mRNA binding [GO:0003729]; translation regulator activity, nucleic acid binding [GO:0090079]; cytoplasmic mRNA processing body assembly [GO:0033962]; deadenylatio…	cytoplasm [GO:0005737]; cytoplasmic side of membrane [GO:0098562]; cytoplasmic stress granule [GO:0010494]; P-body [GO:0000932]; ATP binding [GO:0005524]; ATP-dependent RNA helicase activity [GO:0004004]; chromatin binding [GO:0003682]; mRNA binding [GO:0003729]; translation regulator activity, nucleic acid binding [GO:0090079]; cytoplasmic mRNA processing body assembly [GO:0033962]; deadenylatio…
NTF2_YEAST	1.82721	-0.541811	P33331	Nuclear transport factor 2 (NTF-2) (Nuclear transport factor P10)	NTF2 YER009W	cytoplasm [GO:0005737]; nuclear envelope [GO:0005635]; Ran GTPase binding [GO:0008536]; nucleocytoplasmic transport [GO:0006913]; protein import into nucleus [GO:0006606]	cytoplasm [GO:0005737]; nuclear envelope [GO:0005635]; Ran GTPase binding [GO:0008536]; nucleocytoplasmic transport [GO:0006913]; protein import into nucleus [GO:0006606]	cytoplasm [GO:0005737]; nuclear envelope [GO:0005635]; Ran GTPase binding [GO:0008536]; nucleocytoplasmic transport [GO:0006913]; protein import into nucleus [GO:0006606]	cytoplasm [GO:0005737]; nuclear envelope [GO:0005635]; Ran GTPase binding [GO:0008536]; nucleocytoplasmic transport [GO:0006913]; protein import into nucleus [GO:0006606]
VTC3_YEAST	1.60219	-0.542077	Q02725	Vacuolar transporter chaperone 3 (Phosphate metabolism protein 2)	VTC3 PHM2 YPL019C	endoplasmic reticulum [GO:0005783]; fungal-type vacuole membrane [GO:0000329]; Golgi apparatus [GO:0005794]; integral component of membrane [GO:0016021]; plasma membrane [GO:0005886]; vacuolar transporter chaperone complex [GO:0033254]; inositol hexakisphosphate binding [GO:0000822]; inositol phosphate-mediated signaling [GO:0048016]; lysosomal microautophagy [GO:0016237]; polyphosphate biosynthe…	endoplasmic reticulum [GO:0005783]; fungal-type vacuole membrane [GO:0000329]; Golgi apparatus [GO:0005794]; integral component of membrane [GO:0016021]; plasma membrane [GO:0005886]; vacuolar transporter chaperone complex [GO:0033254]; inositol hexakisphosphate binding [GO:0000822]; inositol phosphate-mediated signaling [GO:0048016]; lysosomal microautophagy [GO:0016237]; polyphosphate biosynthe…	endoplasmic reticulum [GO:0005783]; fungal-type vacuole membrane [GO:0000329]; Golgi apparatus [GO:0005794]; integral component of membrane [GO:0016021]; plasma membrane [GO:0005886]; vacuolar transporter chaperone complex [GO:0033254]; inositol hexakisphosphate binding [GO:0000822]; inositol phosphate-mediated signaling [GO:0048016]; lysosomal microautophagy [GO:0016237]; polyphosphate biosynthe…	endoplasmic reticulum [GO:0005783]; fungal-type vacuole membrane [GO:0000329]; Golgi apparatus [GO:0005794]; integral component of membrane [GO:0016021]; plasma membrane [GO:0005886]; vacuolar transporter chaperone complex [GO:0033254]; inositol hexakisphosphate binding [GO:0000822]; inositol phosphate-mediated signaling [GO:0048016]; lysosomal microautophagy [GO:0016237]; polyphosphate biosynthe…
MTD1_YEAST	1.51352	-0.55535	Q02046	Methylenetetrahydrofolate dehydrogenase [NAD(+)] (EC 1.5.1.15)	MTD1 YKR080W YKR400	cytosol [GO:0005829]; nucleus [GO:0005634]; methylenetetrahydrofolate dehydrogenase (NAD+) activity [GO:0004487]; folic acid-containing compound biosynthetic process [GO:0009396]; one-carbon metabolic process [GO:0006730]; purine nucleobase biosynthetic process [GO:0009113]; purine nucleotide biosynthetic process [GO:0006164]	cytosol [GO:0005829]; nucleus [GO:0005634]; methylenetetrahydrofolate dehydrogenase (NAD+) activity [GO:0004487]; folic acid-containing compound biosynthetic process [GO:0009396]; one-carbon metabolic process [GO:0006730]; purine nucleobase biosynthetic process [GO:0009113]; purine nucleotide biosynthetic process [GO:0006164]	cytosol [GO:0005829]; nucleus [GO:0005634]; methylenetetrahydrofolate dehydrogenase (NAD+) activity [GO:0004487]; folic acid-containing compound biosynthetic process [GO:0009396]; one-carbon metabolic process [GO:0006730]; purine nucleobase biosynthetic process [GO:0009113]; purine nucleotide biosynthetic process [GO:0006164]	cytosol [GO:0005829]; nucleus [GO:0005634]; methylenetetrahydrofolate dehydrogenase (NAD+) activity [GO:0004487]; folic acid-containing compound biosynthetic process [GO:0009396]; one-carbon metabolic process [GO:0006730]; purine nucleobase biosynthetic process [GO:0009113]; purine nucleotide biosynthetic process [GO:0006164]
PYC2_YEAST	2.36456	-0.55899	P32327	Pyruvate carboxylase 2 (EC 6.4.1.1) (Pyruvic carboxylase 2) (PCB 2)	PYC2 YBR218C YBR1507	cytosol [GO:0005829]; ATP binding [GO:0005524]; biotin binding [GO:0009374]; biotin carboxylase activity [GO:0004075]; metal ion binding [GO:0046872]; pyruvate carboxylase activity [GO:0004736]; gluconeogenesis [GO:0006094]; pyruvate metabolic process [GO:0006090]	cytosol [GO:0005829]; ATP binding [GO:0005524]; biotin binding [GO:0009374]; biotin carboxylase activity [GO:0004075]; metal ion binding [GO:0046872]; pyruvate carboxylase activity [GO:0004736]; gluconeogenesis [GO:0006094]; pyruvate metabolic process [GO:0006090]	cytosol [GO:0005829]; ATP binding [GO:0005524]; biotin binding [GO:0009374]; biotin carboxylase activity [GO:0004075]; metal ion binding [GO:0046872]; pyruvate carboxylase activity [GO:0004736]; gluconeogenesis [GO:0006094]; pyruvate metabolic process [GO:0006090]	cytosol [GO:0005829]; ATP binding [GO:0005524]; biotin binding [GO:0009374]; biotin carboxylase activity [GO:0004075]; metal ion binding [GO:0046872]; pyruvate carboxylase activity [GO:0004736]; gluconeogenesis [GO:0006094]; pyruvate metabolic process [GO:0006090]
YM54_YEAST	2.29812	-0.559288	Q04336	Uncharacterized protein YMR196W	YMR196W YM9646.09	mannosyl-oligosaccharide glucosidase activity [GO:0004573]; oligosaccharide metabolic process [GO:0009311]	mannosyl-oligosaccharide glucosidase activity [GO:0004573]; oligosaccharide metabolic process [GO:0009311]	mannosyl-oligosaccharide glucosidase activity [GO:0004573]; oligosaccharide metabolic process [GO:0009311]	mannosyl-oligosaccharide glucosidase activity [GO:0004573]; oligosaccharide metabolic process [GO:0009311]
COX4_YEAST	1.97178	-0.563423	P04037	Cytochrome c oxidase subunit 4, mitochondrial (EC 1.9.3.1) (Cytochrome c oxidase polypeptide IV)	COX4 YGL187C G1362	mitochondrial inner membrane [GO:0005743]; mitochondrial intermembrane space [GO:0005758]; mitochondrial respiratory chain complex IV [GO:0005751]; mitochondrion [GO:0005739]; cytochrome-c oxidase activity [GO:0004129]; zinc ion binding [GO:0008270]; aerobic respiration [GO:0009060]; mitochondrial ATP synthesis coupled proton transport [GO:0042776]; mitochondrial electron transport, cytochrome c …	mitochondrial inner membrane [GO:0005743]; mitochondrial intermembrane space [GO:0005758]; mitochondrial respiratory chain complex IV [GO:0005751]; mitochondrion [GO:0005739]; cytochrome-c oxidase activity [GO:0004129]; zinc ion binding [GO:0008270]; aerobic respiration [GO:0009060]; mitochondrial ATP synthesis coupled proton transport [GO:0042776]; mitochondrial electron transport, cytochrome c …	mitochondrial inner membrane [GO:0005743]; mitochondrial intermembrane space [GO:0005758]; mitochondrial respiratory chain complex IV [GO:0005751]; mitochondrion [GO:0005739]; cytochrome-c oxidase activity [GO:0004129]; zinc ion binding [GO:0008270]; aerobic respiration [GO:0009060]; mitochondrial ATP synthesis coupled proton transport [GO:0042776]; mitochondrial electron transport, cytochrome c …	mitochondrial inner membrane [GO:0005743]; mitochondrial intermembrane space [GO:0005758]; mitochondrial respiratory chain complex IV [GO:0005751]; mitochondrion [GO:0005739]; cytochrome-c oxidase activity [GO:0004129]; zinc ion binding [GO:0008270]; aerobic respiration [GO:0009060]; mitochondrial ATP synthesis coupled proton transport [GO:0042776]; mitochondrial electron transport, cytochrome c …
RS29B_YEAST	2.82943	-0.565841	P41058	40S ribosomal protein S29-B (S36) (Small ribosomal subunit protein uS14-B) (YS29)	RPS29B RPS36B YS29B YDL061C	cytosolic small ribosomal subunit [GO:0022627]; structural constituent of ribosome [GO:0003735]; zinc ion binding [GO:0008270]; cytoplasmic translation [GO:0002181]	cytosolic small ribosomal subunit [GO:0022627]; structural constituent of ribosome [GO:0003735]; zinc ion binding [GO:0008270]; cytoplasmic translation [GO:0002181]	cytosolic small ribosomal subunit [GO:0022627]; structural constituent of ribosome [GO:0003735]; zinc ion binding [GO:0008270]; cytoplasmic translation [GO:0002181]	cytosolic small ribosomal subunit [GO:0022627]; structural constituent of ribosome [GO:0003735]; zinc ion binding [GO:0008270]; cytoplasmic translation [GO:0002181]
PUR91_YEAST	1.73014	-0.57221	P54113	Bifunctional purine biosynthesis protein ADE16 [Includes: Phosphoribosylaminoimidazolecarboxamide formyltransferase (EC 2.1.2.3) (5-aminoimidazole-4-carboxamide ribonucleotide formyltransferase) (AICAR transformylase); IMP cyclohydrolase (EC 3.5.4.10) (ATIC) (IMP synthase) (Inosinicase)]	ADE16 YLR028C	cytosol [GO:0005829]; IMP cyclohydrolase activity [GO:0003937]; phosphoribosylaminoimidazolecarboxamide formyltransferase activity [GO:0004643]; 'de novo' IMP biosynthetic process [GO:0006189]; aerobic respiration [GO:0009060]; ascospore formation [GO:0030437]; purine nucleotide biosynthetic process [GO:0006164]	cytosol [GO:0005829]; IMP cyclohydrolase activity [GO:0003937]; phosphoribosylaminoimidazolecarboxamide formyltransferase activity [GO:0004643]; 'de novo' IMP biosynthetic process [GO:0006189]; aerobic respiration [GO:0009060]; ascospore formation [GO:0030437]; purine nucleotide biosynthetic process [GO:0006164]	cytosol [GO:0005829]; IMP cyclohydrolase activity [GO:0003937]; phosphoribosylaminoimidazolecarboxamide formyltransferase activity [GO:0004643]; 'de novo' IMP biosynthetic process [GO:0006189]; aerobic respiration [GO:0009060]; ascospore formation [GO:0030437]; purine nucleotide biosynthetic process [GO:0006164]	cytosol [GO:0005829]; IMP cyclohydrolase activity [GO:0003937]; phosphoribosylaminoimidazolecarboxamide formyltransferase activity [GO:0004643]; 'de novo' IMP biosynthetic process [GO:0006189]; aerobic respiration [GO:0009060]; ascospore formation [GO:0030437]; purine nucleotide biosynthetic process [GO:0006164]
ACS1_YEAST	2.15124	-0.577654	Q01574	Acetyl-coenzyme A synthetase 1 (EC 6.2.1.1) (Acetate--CoA ligase 1) (Acyl-activating enzyme 1)	ACS1 YAL054C FUN44	cytosol [GO:0005829]; endoplasmic reticulum [GO:0005783]; mitochondrion [GO:0005739]; nucleus [GO:0005634]; acetate-CoA ligase activity [GO:0003987]; acid-ammonia (or amide) ligase activity [GO:0016880]; AMP binding [GO:0016208]; ATP binding [GO:0005524]; acetate fermentation [GO:0019654]; acetyl-CoA biosynthetic process [GO:0006085]; acetyl-CoA biosynthetic process from acetate [GO:0019427]; his…	cytosol [GO:0005829]; endoplasmic reticulum [GO:0005783]; mitochondrion [GO:0005739]; nucleus [GO:0005634]; acetate-CoA ligase activity [GO:0003987]; acid-ammonia (or amide) ligase activity [GO:0016880]; AMP binding [GO:0016208]; ATP binding [GO:0005524]; acetate fermentation [GO:0019654]; acetyl-CoA biosynthetic process [GO:0006085]; acetyl-CoA biosynthetic process from acetate [GO:0019427]; his…	cytosol [GO:0005829]; endoplasmic reticulum [GO:0005783]; mitochondrion [GO:0005739]; nucleus [GO:0005634]; acetate-CoA ligase activity [GO:0003987]; acid-ammonia (or amide) ligase activity [GO:0016880]; AMP binding [GO:0016208]; ATP binding [GO:0005524]; acetate fermentation [GO:0019654]; acetyl-CoA biosynthetic process [GO:0006085]; acetyl-CoA biosynthetic process from acetate [GO:0019427]; his…	cytosol [GO:0005829]; endoplasmic reticulum [GO:0005783]; mitochondrion [GO:0005739]; nucleus [GO:0005634]; acetate-CoA ligase activity [GO:0003987]; acid-ammonia (or amide) ligase activity [GO:0016880]; AMP binding [GO:0016208]; ATP binding [GO:0005524]; acetate fermentation [GO:0019654]; acetyl-CoA biosynthetic process [GO:0006085]; acetyl-CoA biosynthetic process from acetate [GO:0019427]; his…
EDE1_YEAST	1.98602	-0.582022	P34216	EH domain-containing and endocytosis protein 1 (Bud site selection protein 15)	EDE1 BUD15 YBL047C YBL0501 YBL0520	actin cortical patch [GO:0030479]; cellular bud neck [GO:0005935]; cellular bud tip [GO:0005934]; cytoplasm [GO:0005737]; calcium ion binding [GO:0005509]; ubiquitin binding [GO:0043130]; actin cortical patch organization [GO:0044396]; endocytosis [GO:0006897]; endoplasmic reticulum unfolded protein response [GO:0030968]; positive regulation of cytokinesis [GO:0032467]; regulation of protein loca…	actin cortical patch [GO:0030479]; cellular bud neck [GO:0005935]; cellular bud tip [GO:0005934]; cytoplasm [GO:0005737]; calcium ion binding [GO:0005509]; ubiquitin binding [GO:0043130]; actin cortical patch organization [GO:0044396]; endocytosis [GO:0006897]; endoplasmic reticulum unfolded protein response [GO:0030968]; positive regulation of cytokinesis [GO:0032467]; regulation of protein loca…	actin cortical patch [GO:0030479]; cellular bud neck [GO:0005935]; cellular bud tip [GO:0005934]; cytoplasm [GO:0005737]; calcium ion binding [GO:0005509]; ubiquitin binding [GO:0043130]; actin cortical patch organization [GO:0044396]; endocytosis [GO:0006897]; endoplasmic reticulum unfolded protein response [GO:0030968]; positive regulation of cytokinesis [GO:0032467]; regulation of protein loca…	actin cortical patch [GO:0030479]; cellular bud neck [GO:0005935]; cellular bud tip [GO:0005934]; cytoplasm [GO:0005737]; calcium ion binding [GO:0005509]; ubiquitin binding [GO:0043130]; actin cortical patch organization [GO:0044396]; endocytosis [GO:0006897]; endoplasmic reticulum unfolded protein response [GO:0030968]; positive regulation of cytokinesis [GO:0032467]; regulation of protein loca…
CATT_YEAST	2.00002	-0.58223	P06115	Catalase T (EC 1.11.1.6)	CTT1 YGR088W	mitochondrion [GO:0005739]; peroxisome [GO:0005777]; catalase activity [GO:0004096]; heme binding [GO:0020037]; metal ion binding [GO:0046872]; cellular response to salt stress [GO:0071472]; hydrogen peroxide catabolic process [GO:0042744]; response to hydrogen peroxide [GO:0042542]; response to reactive oxygen species [GO:0000302]	mitochondrion [GO:0005739]; peroxisome [GO:0005777]; catalase activity [GO:0004096]; heme binding [GO:0020037]; metal ion binding [GO:0046872]; cellular response to salt stress [GO:0071472]; hydrogen peroxide catabolic process [GO:0042744]; response to hydrogen peroxide [GO:0042542]; response to reactive oxygen species [GO:0000302]	mitochondrion [GO:0005739]; peroxisome [GO:0005777]; catalase activity [GO:0004096]; heme binding [GO:0020037]; metal ion binding [GO:0046872]; cellular response to salt stress [GO:0071472]; hydrogen peroxide catabolic process [GO:0042744]; response to hydrogen peroxide [GO:0042542]; response to reactive oxygen species [GO:0000302]	mitochondrion [GO:0005739]; peroxisome [GO:0005777]; catalase activity [GO:0004096]; heme binding [GO:0020037]; metal ion binding [GO:0046872]; cellular response to salt stress [GO:0071472]; hydrogen peroxide catabolic process [GO:0042744]; response to hydrogen peroxide [GO:0042542]; response to reactive oxygen species [GO:0000302]
UGA2_YEAST	1.49949	-0.604112	P38067	Succinate-semialdehyde dehydrogenase [NADP(+)] (SSDH) (EC 1.2.1.16)	UGA2 UGA5 YBR006W YBR0112	mitochondrial matrix [GO:0005759]; copper ion binding [GO:0005507]; NAD binding [GO:0051287]; succinate-semialdehyde dehydrogenase (NAD+) activity [GO:0004777]; succinate-semialdehyde dehydrogenase [NAD(P)+] activity [GO:0009013]; cellular response to oxidative stress [GO:0034599]; gamma-aminobutyric acid catabolic process [GO:0009450]; glutamate decarboxylation to succinate [GO:0006540]; reactiv…	mitochondrial matrix [GO:0005759]; copper ion binding [GO:0005507]; NAD binding [GO:0051287]; succinate-semialdehyde dehydrogenase (NAD+) activity [GO:0004777]; succinate-semialdehyde dehydrogenase [NAD(P)+] activity [GO:0009013]; cellular response to oxidative stress [GO:0034599]; gamma-aminobutyric acid catabolic process [GO:0009450]; glutamate decarboxylation to succinate [GO:0006540]; reactiv…	mitochondrial matrix [GO:0005759]; copper ion binding [GO:0005507]; NAD binding [GO:0051287]; succinate-semialdehyde dehydrogenase (NAD+) activity [GO:0004777]; succinate-semialdehyde dehydrogenase [NAD(P)+] activity [GO:0009013]; cellular response to oxidative stress [GO:0034599]; gamma-aminobutyric acid catabolic process [GO:0009450]; glutamate decarboxylation to succinate [GO:0006540]; reactiv…	mitochondrial matrix [GO:0005759]; copper ion binding [GO:0005507]; NAD binding [GO:0051287]; succinate-semialdehyde dehydrogenase (NAD+) activity [GO:0004777]; succinate-semialdehyde dehydrogenase [NAD(P)+] activity [GO:0009013]; cellular response to oxidative stress [GO:0034599]; gamma-aminobutyric acid catabolic process [GO:0009450]; glutamate decarboxylation to succinate [GO:0006540]; reactiv…
EIF3B_YEAST	2.06774	-0.605686	P06103	Eukaryotic translation initiation factor 3 subunit B (eIF3b) (Cell cycle regulation and translation initiation protein) (Eukaryotic translation initiation factor 3 90 kDa subunit) (eIF3 p90) (Translation initiation factor eIF3 p90 subunit)	PRT1 CDC63 YOR361C	cytoplasmic stress granule [GO:0010494]; eukaryotic 48S preinitiation complex [GO:0033290]; eukaryotic translation initiation factor 3 complex [GO:0005852]; multi-eIF complex [GO:0043614]; translation initiation factor activity [GO:0003743]; translation initiation factor binding [GO:0031369]; cytoplasmic translational initiation [GO:0002183]; translational initiation [GO:0006413]	cytoplasmic stress granule [GO:0010494]; eukaryotic 48S preinitiation complex [GO:0033290]; eukaryotic translation initiation factor 3 complex [GO:0005852]; multi-eIF complex [GO:0043614]; translation initiation factor activity [GO:0003743]; translation initiation factor binding [GO:0031369]; cytoplasmic translational initiation [GO:0002183]; translational initiation [GO:0006413]	cytoplasmic stress granule [GO:0010494]; eukaryotic 48S preinitiation complex [GO:0033290]; eukaryotic translation initiation factor 3 complex [GO:0005852]; multi-eIF complex [GO:0043614]; translation initiation factor activity [GO:0003743]; translation initiation factor binding [GO:0031369]; cytoplasmic translational initiation [GO:0002183]; translational initiation [GO:0006413]	cytoplasmic stress granule [GO:0010494]; eukaryotic 48S preinitiation complex [GO:0033290]; eukaryotic translation initiation factor 3 complex [GO:0005852]; multi-eIF complex [GO:0043614]; translation initiation factor activity [GO:0003743]; translation initiation factor binding [GO:0031369]; cytoplasmic translational initiation [GO:0002183]; translational initiation [GO:0006413]
DCE_YEAST	1.9337	-0.617691	Q04792	Glutamate decarboxylase (GAD) (EC 4.1.1.15)	GAD1 YMR250W YM9920.04	glutamate decarboxylase activity [GO:0004351]; pyridoxal phosphate binding [GO:0030170]; cellular response to oxidative stress [GO:0034599]; glutamate catabolic process [GO:0006538]	glutamate decarboxylase activity [GO:0004351]; pyridoxal phosphate binding [GO:0030170]; cellular response to oxidative stress [GO:0034599]; glutamate catabolic process [GO:0006538]	glutamate decarboxylase activity [GO:0004351]; pyridoxal phosphate binding [GO:0030170]; cellular response to oxidative stress [GO:0034599]; glutamate catabolic process [GO:0006538]	glutamate decarboxylase activity [GO:0004351]; pyridoxal phosphate binding [GO:0030170]; cellular response to oxidative stress [GO:0034599]; glutamate catabolic process [GO:0006538]
ZUO1_YEAST	1.56033	-0.620799	P32527	Zuotin (DnaJ-related protein ZUO1) (J protein ZUO1) (Heat shock protein 40 homolog ZUO1) (Ribosome-associated complex subunit ZUO1)	ZUO1 YGR285C	cytoplasm [GO:0005737]; nucleolus [GO:0005730]; polysome [GO:0005844]; ribosome [GO:0005840]; DNA binding [GO:0003677]; ribosome binding [GO:0043022]; unfolded protein binding [GO:0051082]; 'de novo' cotranslational protein folding [GO:0051083]; cellular response to cycloheximide [GO:0071409]; negative regulation of cell death [GO:0060548]; positive regulation of transcription from RNA polymerase…	cytoplasm [GO:0005737]; nucleolus [GO:0005730]; polysome [GO:0005844]; ribosome [GO:0005840]; DNA binding [GO:0003677]; ribosome binding [GO:0043022]; unfolded protein binding [GO:0051082]; 'de novo' cotranslational protein folding [GO:0051083]; cellular response to cycloheximide [GO:0071409]; negative regulation of cell death [GO:0060548]; positive regulation of transcription from RNA polymerase…	cytoplasm [GO:0005737]; nucleolus [GO:0005730]; polysome [GO:0005844]; ribosome [GO:0005840]; DNA binding [GO:0003677]; ribosome binding [GO:0043022]; unfolded protein binding [GO:0051082]; 'de novo' cotranslational protein folding [GO:0051083]; cellular response to cycloheximide [GO:0071409]; negative regulation of cell death [GO:0060548]; positive regulation of transcription from RNA polymerase…	cytoplasm [GO:0005737]; nucleolus [GO:0005730]; polysome [GO:0005844]; ribosome [GO:0005840]; DNA binding [GO:0003677]; ribosome binding [GO:0043022]; unfolded protein binding [GO:0051082]; 'de novo' cotranslational protein folding [GO:0051083]; cellular response to cycloheximide [GO:0071409]; negative regulation of cell death [GO:0060548]; positive regulation of transcription from RNA polymerase…
SDS22_YEAST	2.22047	-0.623694	P36047	Protein phosphatase 1 regulatory subunit SDS22	SDS22 EGP1 YKL193C	nucleus [GO:0005634]; protein phosphatase type 1 complex [GO:0000164]; protein phosphatase activator activity [GO:0072542]; protein serine/threonine phosphatase inhibitor activity [GO:0004865]; cell division [GO:0051301]; chromosome segregation [GO:0007059]; maintenance of protein location in nucleus [GO:0051457]; mitotic nuclear division [GO:0007067]	nucleus [GO:0005634]; protein phosphatase type 1 complex [GO:0000164]; protein phosphatase activator activity [GO:0072542]; protein serine/threonine phosphatase inhibitor activity [GO:0004865]; cell division [GO:0051301]; chromosome segregation [GO:0007059]; maintenance of protein location in nucleus [GO:0051457]; mitotic nuclear division [GO:0007067]	nucleus [GO:0005634]; protein phosphatase type 1 complex [GO:0000164]; protein phosphatase activator activity [GO:0072542]; protein serine/threonine phosphatase inhibitor activity [GO:0004865]; cell division [GO:0051301]; chromosome segregation [GO:0007059]; maintenance of protein location in nucleus [GO:0051457]; mitotic nuclear division [GO:0007067]	nucleus [GO:0005634]; protein phosphatase type 1 complex [GO:0000164]; protein phosphatase activator activity [GO:0072542]; protein serine/threonine phosphatase inhibitor activity [GO:0004865]; cell division [GO:0051301]; chromosome segregation [GO:0007059]; maintenance of protein location in nucleus [GO:0051457]; mitotic nuclear division [GO:0007067]
FDFT_YEAST	1.83192	-0.634408	P29704	Squalene synthase (SQS) (SS) (EC 2.5.1.21) (FPP:FPP farnesyltransferase) (Farnesyl-diphosphate farnesyltransferase)	ERG9 YHR190W	endoplasmic reticulum membrane [GO:0005789]; integral component of membrane [GO:0016021]; farnesyl-diphosphate farnesyltransferase activity [GO:0004310]; oxidoreductase activity [GO:0016491]; squalene synthase activity [GO:0051996]; ergosterol biosynthetic process [GO:0006696]; farnesyl diphosphate metabolic process [GO:0045338]; isoprenoid biosynthetic process [GO:0008299]	endoplasmic reticulum membrane [GO:0005789]; integral component of membrane [GO:0016021]; farnesyl-diphosphate farnesyltransferase activity [GO:0004310]; oxidoreductase activity [GO:0016491]; squalene synthase activity [GO:0051996]; ergosterol biosynthetic process [GO:0006696]; farnesyl diphosphate metabolic process [GO:0045338]; isoprenoid biosynthetic process [GO:0008299]	endoplasmic reticulum membrane [GO:0005789]; integral component of membrane [GO:0016021]; farnesyl-diphosphate farnesyltransferase activity [GO:0004310]; oxidoreductase activity [GO:0016491]; squalene synthase activity [GO:0051996]; ergosterol biosynthetic process [GO:0006696]; farnesyl diphosphate metabolic process [GO:0045338]; isoprenoid biosynthetic process [GO:0008299]	endoplasmic reticulum membrane [GO:0005789]; integral component of membrane [GO:0016021]; farnesyl-diphosphate farnesyltransferase activity [GO:0004310]; oxidoreductase activity [GO:0016491]; squalene synthase activity [GO:0051996]; ergosterol biosynthetic process [GO:0006696]; farnesyl diphosphate metabolic process [GO:0045338]; isoprenoid biosynthetic process [GO:0008299]
VTC2_YEAST	1.65585	-0.643088	P43585	Vacuolar transporter chaperone 2 (Phosphate metabolism protein 1)	VTC2 PHM1 YFL004W	endoplasmic reticulum [GO:0005783]; fungal-type vacuole membrane [GO:0000329]; Golgi apparatus [GO:0005794]; integral component of membrane [GO:0016021]; plasma membrane [GO:0005886]; vacuolar transporter chaperone complex [GO:0033254]; inositol hexakisphosphate binding [GO:0000822]; inositol phosphate-mediated signaling [GO:0048016]; lysosomal microautophagy [GO:0016237]; polyphosphate biosynthe…	endoplasmic reticulum [GO:0005783]; fungal-type vacuole membrane [GO:0000329]; Golgi apparatus [GO:0005794]; integral component of membrane [GO:0016021]; plasma membrane [GO:0005886]; vacuolar transporter chaperone complex [GO:0033254]; inositol hexakisphosphate binding [GO:0000822]; inositol phosphate-mediated signaling [GO:0048016]; lysosomal microautophagy [GO:0016237]; polyphosphate biosynthe…	endoplasmic reticulum [GO:0005783]; fungal-type vacuole membrane [GO:0000329]; Golgi apparatus [GO:0005794]; integral component of membrane [GO:0016021]; plasma membrane [GO:0005886]; vacuolar transporter chaperone complex [GO:0033254]; inositol hexakisphosphate binding [GO:0000822]; inositol phosphate-mediated signaling [GO:0048016]; lysosomal microautophagy [GO:0016237]; polyphosphate biosynthe…	endoplasmic reticulum [GO:0005783]; fungal-type vacuole membrane [GO:0000329]; Golgi apparatus [GO:0005794]; integral component of membrane [GO:0016021]; plasma membrane [GO:0005886]; vacuolar transporter chaperone complex [GO:0033254]; inositol hexakisphosphate binding [GO:0000822]; inositol phosphate-mediated signaling [GO:0048016]; lysosomal microautophagy [GO:0016237]; polyphosphate biosynthe…
ODO2_YEAST	1.82086	-0.658769	P19262	Dihydrolipoyllysine-residue succinyltransferase component of 2-oxoglutarate dehydrogenase complex, mitochondrial (EC 2.3.1.61) (2-oxoglutarate dehydrogenase complex component E2) (OGDC-E2) (Dihydrolipoamide succinyltransferase component of 2-oxoglutarate dehydrogenase complex)	KGD2 YDR148C YD8358.05C	mitochondrial nucleoid [GO:0042645]; mitochondrial oxoglutarate dehydrogenase complex [GO:0009353]; dihydrolipoyllysine-residue succinyltransferase activity [GO:0004149]; 2-oxoglutarate metabolic process [GO:0006103]; L-lysine catabolic process to acetyl-CoA via saccharopine [GO:0033512]; mitochondrial genome maintenance [GO:0000002]; tricarboxylic acid cycle [GO:0006099]	mitochondrial nucleoid [GO:0042645]; mitochondrial oxoglutarate dehydrogenase complex [GO:0009353]; dihydrolipoyllysine-residue succinyltransferase activity [GO:0004149]; 2-oxoglutarate metabolic process [GO:0006103]; L-lysine catabolic process to acetyl-CoA via saccharopine [GO:0033512]; mitochondrial genome maintenance [GO:0000002]; tricarboxylic acid cycle [GO:0006099]	mitochondrial nucleoid [GO:0042645]; mitochondrial oxoglutarate dehydrogenase complex [GO:0009353]; dihydrolipoyllysine-residue succinyltransferase activity [GO:0004149]; 2-oxoglutarate metabolic process [GO:0006103]; L-lysine catabolic process to acetyl-CoA via saccharopine [GO:0033512]; mitochondrial genome maintenance [GO:0000002]; tricarboxylic acid cycle [GO:0006099]	mitochondrial nucleoid [GO:0042645]; mitochondrial oxoglutarate dehydrogenase complex [GO:0009353]; dihydrolipoyllysine-residue succinyltransferase activity [GO:0004149]; 2-oxoglutarate metabolic process [GO:0006103]; L-lysine catabolic process to acetyl-CoA via saccharopine [GO:0033512]; mitochondrial genome maintenance [GO:0000002]; tricarboxylic acid cycle [GO:0006099]
GPDM_YEAST	1.62361	-0.663074	P32191	Glycerol-3-phosphate dehydrogenase, mitochondrial (GPD-M) (GPDH-M) (EC 1.1.5.3)	GUT2 YIL155C	glycerol-3-phosphate dehydrogenase complex [GO:0009331]; integral component of mitochondrial outer membrane [GO:0031307]; mitochondrial inner membrane [GO:0005743]; mitochondrion [GO:0005739]; glycerol-3-phosphate dehydrogenase activity [GO:0004368]; sn-glycerol-3-phosphate:ubiquinone-8 oxidoreductase activity [GO:0052591]; glycerol catabolic process [GO:0019563]; glycerol metabolic process [GO:0…	glycerol-3-phosphate dehydrogenase complex [GO:0009331]; integral component of mitochondrial outer membrane [GO:0031307]; mitochondrial inner membrane [GO:0005743]; mitochondrion [GO:0005739]; glycerol-3-phosphate dehydrogenase activity [GO:0004368]; sn-glycerol-3-phosphate:ubiquinone-8 oxidoreductase activity [GO:0052591]; glycerol catabolic process [GO:0019563]; glycerol metabolic process [GO:0…	glycerol-3-phosphate dehydrogenase complex [GO:0009331]; integral component of mitochondrial outer membrane [GO:0031307]; mitochondrial inner membrane [GO:0005743]; mitochondrion [GO:0005739]; glycerol-3-phosphate dehydrogenase activity [GO:0004368]; sn-glycerol-3-phosphate:ubiquinone-8 oxidoreductase activity [GO:0052591]; glycerol catabolic process [GO:0019563]; glycerol metabolic process [GO:0…	glycerol-3-phosphate dehydrogenase complex [GO:0009331]; integral component of mitochondrial outer membrane [GO:0031307]; mitochondrial inner membrane [GO:0005743]; mitochondrion [GO:0005739]; glycerol-3-phosphate dehydrogenase activity [GO:0004368]; sn-glycerol-3-phosphate:ubiquinone-8 oxidoreductase activity [GO:0052591]; glycerol catabolic process [GO:0019563]; glycerol metabolic process [GO:0…
ARPC4_YEAST	2.56621	-0.692627	P33204	Actin-related protein 2/3 complex subunit 4 (Arp2/3 complex 20 kDa) (p20-ARC)	ARC19 YKL013C YKL166	actin cortical patch [GO:0030479]; Arp2/3 protein complex [GO:0005885]; actin binding [GO:0003779]; structural molecule activity [GO:0005198]; actin cortical patch assembly [GO:0000147]; actin filament polymerization [GO:0030041]; Arp2/3 complex-mediated actin nucleation [GO:0034314]; cell morphogenesis [GO:0000902]; mitochondrion inheritance [GO:0000001]	actin cortical patch [GO:0030479]; Arp2/3 protein complex [GO:0005885]; actin binding [GO:0003779]; structural molecule activity [GO:0005198]; actin cortical patch assembly [GO:0000147]; actin filament polymerization [GO:0030041]; Arp2/3 complex-mediated actin nucleation [GO:0034314]; cell morphogenesis [GO:0000902]; mitochondrion inheritance [GO:0000001]	actin cortical patch [GO:0030479]; Arp2/3 protein complex [GO:0005885]; actin binding [GO:0003779]; structural molecule activity [GO:0005198]; actin cortical patch assembly [GO:0000147]; actin filament polymerization [GO:0030041]; Arp2/3 complex-mediated actin nucleation [GO:0034314]; cell morphogenesis [GO:0000902]; mitochondrion inheritance [GO:0000001]	actin cortical patch [GO:0030479]; Arp2/3 protein complex [GO:0005885]; actin binding [GO:0003779]; structural molecule activity [GO:0005198]; actin cortical patch assembly [GO:0000147]; actin filament polymerization [GO:0030041]; Arp2/3 complex-mediated actin nucleation [GO:0034314]; cell morphogenesis [GO:0000902]; mitochondrion inheritance [GO:0000001]
GPD2_YEAST	2.0562	-0.695661	P41911	Glycerol-3-phosphate dehydrogenase [NAD(+)] 2, mitochondrial (EC 1.1.1.8)	GPD2 GPD3 YOL059W O1222	cytosol [GO:0005829]; glycerol-3-phosphate dehydrogenase complex [GO:0009331]; mitochondrion [GO:0005739]; glycerol-3-phosphate dehydrogenase [NAD+] activity [GO:0004367]; NAD binding [GO:0051287]; protein homodimerization activity [GO:0042803]; glycerol metabolic process [GO:0006071]; glycerol-3-phosphate catabolic process [GO:0046168]; NADH oxidation [GO:0006116]	cytosol [GO:0005829]; glycerol-3-phosphate dehydrogenase complex [GO:0009331]; mitochondrion [GO:0005739]; glycerol-3-phosphate dehydrogenase [NAD+] activity [GO:0004367]; NAD binding [GO:0051287]; protein homodimerization activity [GO:0042803]; glycerol metabolic process [GO:0006071]; glycerol-3-phosphate catabolic process [GO:0046168]; NADH oxidation [GO:0006116]	cytosol [GO:0005829]; glycerol-3-phosphate dehydrogenase complex [GO:0009331]; mitochondrion [GO:0005739]; glycerol-3-phosphate dehydrogenase [NAD+] activity [GO:0004367]; NAD binding [GO:0051287]; protein homodimerization activity [GO:0042803]; glycerol metabolic process [GO:0006071]; glycerol-3-phosphate catabolic process [GO:0046168]; NADH oxidation [GO:0006116]	cytosol [GO:0005829]; glycerol-3-phosphate dehydrogenase complex [GO:0009331]; mitochondrion [GO:0005739]; glycerol-3-phosphate dehydrogenase [NAD+] activity [GO:0004367]; NAD binding [GO:0051287]; protein homodimerization activity [GO:0042803]; glycerol metabolic process [GO:0006071]; glycerol-3-phosphate catabolic process [GO:0046168]; NADH oxidation [GO:0006116]
SYA_YEAST	1.72183	-0.695849	P40825	Alanine--tRNA ligase, mitochondrial (EC 6.1.1.7) (Alanyl-tRNA synthetase) (AlaRS)	ALA1 CDC64 YOR335C	cytoplasm [GO:0005737]; mitochondrion [GO:0005739]; alanine-tRNA ligase activity [GO:0004813]; amino acid binding [GO:0016597]; ATP binding [GO:0005524]; metal ion binding [GO:0046872]; tRNA binding [GO:0000049]; alanyl-tRNA aminoacylation [GO:0006419]; mitochondrial alanyl-tRNA aminoacylation [GO:0070143]; tRNA modification [GO:0006400]	cytoplasm [GO:0005737]; mitochondrion [GO:0005739]; alanine-tRNA ligase activity [GO:0004813]; amino acid binding [GO:0016597]; ATP binding [GO:0005524]; metal ion binding [GO:0046872]; tRNA binding [GO:0000049]; alanyl-tRNA aminoacylation [GO:0006419]; mitochondrial alanyl-tRNA aminoacylation [GO:0070143]; tRNA modification [GO:0006400]	cytoplasm [GO:0005737]; mitochondrion [GO:0005739]; alanine-tRNA ligase activity [GO:0004813]; amino acid binding [GO:0016597]; ATP binding [GO:0005524]; metal ion binding [GO:0046872]; tRNA binding [GO:0000049]; alanyl-tRNA aminoacylation [GO:0006419]; mitochondrial alanyl-tRNA aminoacylation [GO:0070143]; tRNA modification [GO:0006400]	cytoplasm [GO:0005737]; mitochondrion [GO:0005739]; alanine-tRNA ligase activity [GO:0004813]; amino acid binding [GO:0016597]; ATP binding [GO:0005524]; metal ion binding [GO:0046872]; tRNA binding [GO:0000049]; alanyl-tRNA aminoacylation [GO:0006419]; mitochondrial alanyl-tRNA aminoacylation [GO:0070143]; tRNA modification [GO:0006400]
TMT1_YEAST	1.94478	-0.699344	P32643	Trans-aconitate 3-methyltransferase (EC 2.1.1.145)	TMT1 TAM1 YER175C SYGP-ORF63	cytosol [GO:0005829]; trans-aconitate 3-methyltransferase activity [GO:0046547]	cytosol [GO:0005829]; trans-aconitate 3-methyltransferase activity [GO:0046547]	cytosol [GO:0005829]; trans-aconitate 3-methyltransferase activity [GO:0046547]	cytosol [GO:0005829]; trans-aconitate 3-methyltransferase activity [GO:0046547]
YAT2_YEAST	2.57092	-0.72701	P40017	Carnitine O-acetyltransferase YAT2 (EC 2.3.1.7)	YAT2 YER024W	cytosol [GO:0005829]; carnitine O-acetyltransferase activity [GO:0004092]; alcohol metabolic process [GO:0006066]; carnitine metabolic process [GO:0009437]; fatty acid metabolic process [GO:0006631]; transport [GO:0006810]	cytosol [GO:0005829]; carnitine O-acetyltransferase activity [GO:0004092]; alcohol metabolic process [GO:0006066]; carnitine metabolic process [GO:0009437]; fatty acid metabolic process [GO:0006631]; transport [GO:0006810]	cytosol [GO:0005829]; carnitine O-acetyltransferase activity [GO:0004092]; alcohol metabolic process [GO:0006066]; carnitine metabolic process [GO:0009437]; fatty acid metabolic process [GO:0006631]; transport [GO:0006810]	cytosol [GO:0005829]; carnitine O-acetyltransferase activity [GO:0004092]; alcohol metabolic process [GO:0006066]; carnitine metabolic process [GO:0009437]; fatty acid metabolic process [GO:0006631]; transport [GO:0006810]
SEC31_YEAST	1.38304	-0.739782	P38968	Protein transport protein SEC31 (Protein WEB1)	SEC31 WEB1 YDL195W D1229	COPII vesicle coat [GO:0030127]; endoplasmic reticulum membrane [GO:0005789]; Golgi membrane [GO:0000139]; structural molecule activity [GO:0005198]; COPII-coated vesicle budding [GO:0090114]; protein transport [GO:0015031]	COPII vesicle coat [GO:0030127]; endoplasmic reticulum membrane [GO:0005789]; Golgi membrane [GO:0000139]; structural molecule activity [GO:0005198]; COPII-coated vesicle budding [GO:0090114]; protein transport [GO:0015031]	COPII vesicle coat [GO:0030127]; endoplasmic reticulum membrane [GO:0005789]; Golgi membrane [GO:0000139]; structural molecule activity [GO:0005198]; COPII-coated vesicle budding [GO:0090114]; protein transport [GO:0015031]	COPII vesicle coat [GO:0030127]; endoplasmic reticulum membrane [GO:0005789]; Golgi membrane [GO:0000139]; structural molecule activity [GO:0005198]; COPII-coated vesicle budding [GO:0090114]; protein transport [GO:0015031]
ACON_YEAST	1.61653	-0.745996	P19414	Aconitate hydratase, mitochondrial (Aconitase) (EC 4.2.1.3) (Citrate hydro-lyase)	ACO1 GLU1 YLR304C L8003.22	cytosol [GO:0005829]; mitochondrial intermembrane space [GO:0005758]; mitochondrial matrix [GO:0005759]; mitochondrial nucleoid [GO:0042645]; 4 iron, 4 sulfur cluster binding [GO:0051539]; aconitate hydratase activity [GO:0003994]; double-stranded DNA binding [GO:0003690]; metal ion binding [GO:0046872]; single-stranded DNA binding [GO:0003697]; mitochondrial genome maintenance [GO:0000002]; prot…	cytosol [GO:0005829]; mitochondrial intermembrane space [GO:0005758]; mitochondrial matrix [GO:0005759]; mitochondrial nucleoid [GO:0042645]; 4 iron, 4 sulfur cluster binding [GO:0051539]; aconitate hydratase activity [GO:0003994]; double-stranded DNA binding [GO:0003690]; metal ion binding [GO:0046872]; single-stranded DNA binding [GO:0003697]; mitochondrial genome maintenance [GO:0000002]; prot…	cytosol [GO:0005829]; mitochondrial intermembrane space [GO:0005758]; mitochondrial matrix [GO:0005759]; mitochondrial nucleoid [GO:0042645]; 4 iron, 4 sulfur cluster binding [GO:0051539]; aconitate hydratase activity [GO:0003994]; double-stranded DNA binding [GO:0003690]; metal ion binding [GO:0046872]; single-stranded DNA binding [GO:0003697]; mitochondrial genome maintenance [GO:0000002]; prot…	cytosol [GO:0005829]; mitochondrial intermembrane space [GO:0005758]; mitochondrial matrix [GO:0005759]; mitochondrial nucleoid [GO:0042645]; 4 iron, 4 sulfur cluster binding [GO:0051539]; aconitate hydratase activity [GO:0003994]; double-stranded DNA binding [GO:0003690]; metal ion binding [GO:0046872]; single-stranded DNA binding [GO:0003697]; mitochondrial genome maintenance [GO:0000002]; prot…
ACH1_YEAST	2.74008	-0.746387	P32316	Acetyl-CoA hydrolase (EC 3.1.2.1) (Acetyl-CoA deacylase) (Acetyl-CoA acylase)	ACH1 YBL015W YBL03.18 YBL0304	cytosol [GO:0005829]; mitochondrion [GO:0005739]; acetate CoA-transferase activity [GO:0008775]; acetyl-CoA hydrolase activity [GO:0003986]; acetate metabolic process [GO:0006083]; acetyl-CoA metabolic process [GO:0006084]; propionate metabolic process, methylcitrate cycle [GO:0019679]	cytosol [GO:0005829]; mitochondrion [GO:0005739]; acetate CoA-transferase activity [GO:0008775]; acetyl-CoA hydrolase activity [GO:0003986]; acetate metabolic process [GO:0006083]; acetyl-CoA metabolic process [GO:0006084]; propionate metabolic process, methylcitrate cycle [GO:0019679]	cytosol [GO:0005829]; mitochondrion [GO:0005739]; acetate CoA-transferase activity [GO:0008775]; acetyl-CoA hydrolase activity [GO:0003986]; acetate metabolic process [GO:0006083]; acetyl-CoA metabolic process [GO:0006084]; propionate metabolic process, methylcitrate cycle [GO:0019679]	cytosol [GO:0005829]; mitochondrion [GO:0005739]; acetate CoA-transferase activity [GO:0008775]; acetyl-CoA hydrolase activity [GO:0003986]; acetate metabolic process [GO:0006083]; acetyl-CoA metabolic process [GO:0006084]; propionate metabolic process, methylcitrate cycle [GO:0019679]
AIP1_YEAST	3.03009	-0.746756	P46680	Actin-interacting protein 1	AIP1 YMR092C YM9582.17C	actin cortical patch [GO:0030479]; actin filament [GO:0005884]; actomyosin, actin portion [GO:0042643]; actin binding [GO:0003779]; actin filament binding [GO:0051015]; actin filament depolymerization [GO:0030042]; barbed-end actin filament capping [GO:0051016]; negative regulation of cytokinesis [GO:0032466]; positive regulation of actin filament depolymerization [GO:0030836]; response to osmoti…	actin cortical patch [GO:0030479]; actin filament [GO:0005884]; actomyosin, actin portion [GO:0042643]; actin binding [GO:0003779]; actin filament binding [GO:0051015]; actin filament depolymerization [GO:0030042]; barbed-end actin filament capping [GO:0051016]; negative regulation of cytokinesis [GO:0032466]; positive regulation of actin filament depolymerization [GO:0030836]; response to osmoti…	actin cortical patch [GO:0030479]; actin filament [GO:0005884]; actomyosin, actin portion [GO:0042643]; actin binding [GO:0003779]; actin filament binding [GO:0051015]; actin filament depolymerization [GO:0030042]; barbed-end actin filament capping [GO:0051016]; negative regulation of cytokinesis [GO:0032466]; positive regulation of actin filament depolymerization [GO:0030836]; response to osmoti…	actin cortical patch [GO:0030479]; actin filament [GO:0005884]; actomyosin, actin portion [GO:0042643]; actin binding [GO:0003779]; actin filament binding [GO:0051015]; actin filament depolymerization [GO:0030042]; barbed-end actin filament capping [GO:0051016]; negative regulation of cytokinesis [GO:0032466]; positive regulation of actin filament depolymerization [GO:0030836]; response to osmoti…
RL43B_YEAST	1.36183	-0.749617	P0CX26	60S ribosomal protein L43-B (L37a) (Large ribosomal subunit protein eL43-B) (YL35)	RPL43B YJR094W-A YJR094BW	cytosolic large ribosomal subunit [GO:0022625]; metal ion binding [GO:0046872]; structural constituent of ribosome [GO:0003735]; cytoplasmic translation [GO:0002181]	cytosolic large ribosomal subunit [GO:0022625]; metal ion binding [GO:0046872]; structural constituent of ribosome [GO:0003735]; cytoplasmic translation [GO:0002181]	cytosolic large ribosomal subunit [GO:0022625]; metal ion binding [GO:0046872]; structural constituent of ribosome [GO:0003735]; cytoplasmic translation [GO:0002181]	cytosolic large ribosomal subunit [GO:0022625]; metal ion binding [GO:0046872]; structural constituent of ribosome [GO:0003735]; cytoplasmic translation [GO:0002181]
XRN1_YEAST	2.24686	-0.75516	P22147	5'-3' exoribonuclease 1 (EC 3.1.13.-) (DNA strand transfer protein beta) (STP-beta) (KAR(-)-enhancing mutation protein) (Strand exchange protein 1) (p175)	XRN1 DST2 KEM1 RAR5 SEP1 SKI1 YGL173C G1645	cytoplasm [GO:0005737]; cytoplasmic stress granule [GO:0010494]; cytosol [GO:0005829]; microtubule [GO:0005874]; nucleus [GO:0005634]; P-body [GO:0000932]; perinuclear region of cytoplasm [GO:0048471]; 5'-3' exoribonuclease activity [GO:0004534]; chromatin binding [GO:0003682]; RNA binding [GO:0003723]; exonucleolytic nuclear-transcribed mRNA catabolic process involved in deadenylation-dependent …	cytoplasm [GO:0005737]; cytoplasmic stress granule [GO:0010494]; cytosol [GO:0005829]; microtubule [GO:0005874]; nucleus [GO:0005634]; P-body [GO:0000932]; perinuclear region of cytoplasm [GO:0048471]; 5'-3' exoribonuclease activity [GO:0004534]; chromatin binding [GO:0003682]; RNA binding [GO:0003723]; exonucleolytic nuclear-transcribed mRNA catabolic process involved in deadenylation-dependent …	cytoplasm [GO:0005737]; cytoplasmic stress granule [GO:0010494]; cytosol [GO:0005829]; microtubule [GO:0005874]; nucleus [GO:0005634]; P-body [GO:0000932]; perinuclear region of cytoplasm [GO:0048471]; 5'-3' exoribonuclease activity [GO:0004534]; chromatin binding [GO:0003682]; RNA binding [GO:0003723]; exonucleolytic nuclear-transcribed mRNA catabolic process involved in deadenylation-dependent …	cytoplasm [GO:0005737]; cytoplasmic stress granule [GO:0010494]; cytosol [GO:0005829]; microtubule [GO:0005874]; nucleus [GO:0005634]; P-body [GO:0000932]; perinuclear region of cytoplasm [GO:0048471]; 5'-3' exoribonuclease activity [GO:0004534]; chromatin binding [GO:0003682]; RNA binding [GO:0003723]; exonucleolytic nuclear-transcribed mRNA catabolic process involved in deadenylation-dependent …
RV167_YEAST	1.32938	-0.763078	P39743	Reduced viability upon starvation protein 167	RVS167 YDR388W D9509.8	actin cortical patch [GO:0030479]; mating projection tip [GO:0043332]; Rvs161p-Rvs167p complex [GO:1990528]; trans-Golgi network [GO:0005802]; actin binding [GO:0003779]; ARF guanyl-nucleotide exchange factor activity [GO:0005086]; calmodulin binding [GO:0005516]; cytoskeletal protein binding [GO:0008092]; identical protein binding [GO:0042802]; actin cortical patch localization [GO:0051666]; end…	actin cortical patch [GO:0030479]; mating projection tip [GO:0043332]; Rvs161p-Rvs167p complex [GO:1990528]; trans-Golgi network [GO:0005802]; actin binding [GO:0003779]; ARF guanyl-nucleotide exchange factor activity [GO:0005086]; calmodulin binding [GO:0005516]; cytoskeletal protein binding [GO:0008092]; identical protein binding [GO:0042802]; actin cortical patch localization [GO:0051666]; end…	actin cortical patch [GO:0030479]; mating projection tip [GO:0043332]; Rvs161p-Rvs167p complex [GO:1990528]; trans-Golgi network [GO:0005802]; actin binding [GO:0003779]; ARF guanyl-nucleotide exchange factor activity [GO:0005086]; calmodulin binding [GO:0005516]; cytoskeletal protein binding [GO:0008092]; identical protein binding [GO:0042802]; actin cortical patch localization [GO:0051666]; end…	actin cortical patch [GO:0030479]; mating projection tip [GO:0043332]; Rvs161p-Rvs167p complex [GO:1990528]; trans-Golgi network [GO:0005802]; actin binding [GO:0003779]; ARF guanyl-nucleotide exchange factor activity [GO:0005086]; calmodulin binding [GO:0005516]; cytoskeletal protein binding [GO:0008092]; identical protein binding [GO:0042802]; actin cortical patch localization [GO:0051666]; end…
CRP1_YEAST	1.35612	-0.766456	P38845	Cruciform DNA-recognizing protein 1 [Cleaved into: CRP1 short N-terminal subpeptide; CRP1 short C-terminal subpeptide]	CRP1 YHR146W	nucleus [GO:0005634]; DNA binding [GO:0003677]	nucleus [GO:0005634]; DNA binding [GO:0003677]	nucleus [GO:0005634]; DNA binding [GO:0003677]	nucleus [GO:0005634]; DNA binding [GO:0003677]
CACP_YEAST	3.77243	-0.766971	P32796	Carnitine O-acetyltransferase, mitochondrial (Carnitine acetylase) (EC 2.3.1.7)	CAT2 CAT YCAT YML042W YM8054.01	mitochondrial inner membrane [GO:0005743]; mitochondrion [GO:0005739]; peroxisome [GO:0005777]; carnitine O-acetyltransferase activity [GO:0004092]; carnitine metabolic process [GO:0009437]; fatty acid metabolic process [GO:0006631]; transport [GO:0006810]	mitochondrial inner membrane [GO:0005743]; mitochondrion [GO:0005739]; peroxisome [GO:0005777]; carnitine O-acetyltransferase activity [GO:0004092]; carnitine metabolic process [GO:0009437]; fatty acid metabolic process [GO:0006631]; transport [GO:0006810]	mitochondrial inner membrane [GO:0005743]; mitochondrion [GO:0005739]; peroxisome [GO:0005777]; carnitine O-acetyltransferase activity [GO:0004092]; carnitine metabolic process [GO:0009437]; fatty acid metabolic process [GO:0006631]; transport [GO:0006810]	mitochondrial inner membrane [GO:0005743]; mitochondrion [GO:0005739]; peroxisome [GO:0005777]; carnitine O-acetyltransferase activity [GO:0004092]; carnitine metabolic process [GO:0009437]; fatty acid metabolic process [GO:0006631]; transport [GO:0006810]
SC160_YEAST	2.74647	-0.780477	P06105	Protein SCP160 (Protein HX)	SCP160 HX YJL080C J1017	chromosome, telomeric region [GO:0000781]; cytoplasm [GO:0005737]; endoplasmic reticulum [GO:0005783]; endoplasmic reticulum membrane [GO:0005789]; nuclear membrane [GO:0031965]; nuclear outer membrane-endoplasmic reticulum membrane network [GO:0042175]; polysome [GO:0005844]; G-protein alpha-subunit binding [GO:0001965]; mRNA binding [GO:0003729]; RNA binding [GO:0003723]; chemotropism [GO:00435…	chromosome, telomeric region [GO:0000781]; cytoplasm [GO:0005737]; endoplasmic reticulum [GO:0005783]; endoplasmic reticulum membrane [GO:0005789]; nuclear membrane [GO:0031965]; nuclear outer membrane-endoplasmic reticulum membrane network [GO:0042175]; polysome [GO:0005844]; G-protein alpha-subunit binding [GO:0001965]; mRNA binding [GO:0003729]; RNA binding [GO:0003723]; chemotropism [GO:00435…	chromosome, telomeric region [GO:0000781]; cytoplasm [GO:0005737]; endoplasmic reticulum [GO:0005783]; endoplasmic reticulum membrane [GO:0005789]; nuclear membrane [GO:0031965]; nuclear outer membrane-endoplasmic reticulum membrane network [GO:0042175]; polysome [GO:0005844]; G-protein alpha-subunit binding [GO:0001965]; mRNA binding [GO:0003729]; RNA binding [GO:0003723]; chemotropism [GO:00435…	chromosome, telomeric region [GO:0000781]; cytoplasm [GO:0005737]; endoplasmic reticulum [GO:0005783]; endoplasmic reticulum membrane [GO:0005789]; nuclear membrane [GO:0031965]; nuclear outer membrane-endoplasmic reticulum membrane network [GO:0042175]; polysome [GO:0005844]; G-protein alpha-subunit binding [GO:0001965]; mRNA binding [GO:0003729]; RNA binding [GO:0003723]; chemotropism [GO:00435…
MCFS2_YEAST	3.59062	-0.78572	P38295	Medium-chain fatty acid ethyl ester synthase/esterase 2 (Alcohol O-acetyltransferase) (EC 2.3.1.84) (EC 3.1.1.-) (Ethanol hexanoyl transferase 1)	EHT1 YBR177C YBR1239	lipid particle [GO:0005811]; acylglycerol lipase activity [GO:0047372]; alcohol O-acetyltransferase activity [GO:0004026]; alcohol O-butanoyltransferase activity [GO:0034319]; short-chain carboxylesterase activity [GO:0034338]; cellular lipid metabolic process [GO:0044255]; medium-chain fatty acid biosynthetic process [GO:0051792]; medium-chain fatty acid catabolic process [GO:0051793]	lipid particle [GO:0005811]; acylglycerol lipase activity [GO:0047372]; alcohol O-acetyltransferase activity [GO:0004026]; alcohol O-butanoyltransferase activity [GO:0034319]; short-chain carboxylesterase activity [GO:0034338]; cellular lipid metabolic process [GO:0044255]; medium-chain fatty acid biosynthetic process [GO:0051792]; medium-chain fatty acid catabolic process [GO:0051793]	lipid particle [GO:0005811]; acylglycerol lipase activity [GO:0047372]; alcohol O-acetyltransferase activity [GO:0004026]; alcohol O-butanoyltransferase activity [GO:0034319]; short-chain carboxylesterase activity [GO:0034338]; cellular lipid metabolic process [GO:0044255]; medium-chain fatty acid biosynthetic process [GO:0051792]; medium-chain fatty acid catabolic process [GO:0051793]	lipid particle [GO:0005811]; acylglycerol lipase activity [GO:0047372]; alcohol O-acetyltransferase activity [GO:0004026]; alcohol O-butanoyltransferase activity [GO:0034319]; short-chain carboxylesterase activity [GO:0034338]; cellular lipid metabolic process [GO:0044255]; medium-chain fatty acid biosynthetic process [GO:0051792]; medium-chain fatty acid catabolic process [GO:0051793]
CWP1_YEAST	3.24722	-0.788258	P28319	Cell wall protein CWP1 (Glycoprotein GP40)	CWP1 YKL096W YJU1 YKL443	anchored component of membrane [GO:0031225]; cellular birth scar [GO:0071597]; extracellular region [GO:0005576]; fungal-type cell wall [GO:0009277]; prospore membrane [GO:0005628]; structural constituent of cell wall [GO:0005199]; ascospore-type prospore membrane assembly [GO:0032120]; fungal-type cell wall organization [GO:0031505]	anchored component of membrane [GO:0031225]; cellular birth scar [GO:0071597]; extracellular region [GO:0005576]; fungal-type cell wall [GO:0009277]; prospore membrane [GO:0005628]; structural constituent of cell wall [GO:0005199]; ascospore-type prospore membrane assembly [GO:0032120]; fungal-type cell wall organization [GO:0031505]	anchored component of membrane [GO:0031225]; cellular birth scar [GO:0071597]; extracellular region [GO:0005576]; fungal-type cell wall [GO:0009277]; prospore membrane [GO:0005628]; structural constituent of cell wall [GO:0005199]; ascospore-type prospore membrane assembly [GO:0032120]; fungal-type cell wall organization [GO:0031505]	anchored component of membrane [GO:0031225]; cellular birth scar [GO:0071597]; extracellular region [GO:0005576]; fungal-type cell wall [GO:0009277]; prospore membrane [GO:0005628]; structural constituent of cell wall [GO:0005199]; ascospore-type prospore membrane assembly [GO:0032120]; fungal-type cell wall organization [GO:0031505]
SBA1_YEAST	1.5231	-0.788817	P28707	Co-chaperone protein SBA1	SBA1 YKL117W YKL518	cytoplasm [GO:0005737]; nucleus [GO:0005634]; chaperone binding [GO:0051087]; negative regulation of DNA binding [GO:0043392]; positive regulation of telomere maintenance via telomerase [GO:0032212]; protein folding [GO:0006457]; regulation of telomerase activity [GO:0051972]	cytoplasm [GO:0005737]; nucleus [GO:0005634]; chaperone binding [GO:0051087]; negative regulation of DNA binding [GO:0043392]; positive regulation of telomere maintenance via telomerase [GO:0032212]; protein folding [GO:0006457]; regulation of telomerase activity [GO:0051972]	cytoplasm [GO:0005737]; nucleus [GO:0005634]; chaperone binding [GO:0051087]; negative regulation of DNA binding [GO:0043392]; positive regulation of telomere maintenance via telomerase [GO:0032212]; protein folding [GO:0006457]; regulation of telomerase activity [GO:0051972]	cytoplasm [GO:0005737]; nucleus [GO:0005634]; chaperone binding [GO:0051087]; negative regulation of DNA binding [GO:0043392]; positive regulation of telomere maintenance via telomerase [GO:0032212]; protein folding [GO:0006457]; regulation of telomerase activity [GO:0051972]
GLRX2_YEAST	2.67482	-0.79311	P17695	Glutaredoxin-2, mitochondrial (Glutathione-dependent oxidoreductase 2) (Thioltransferase)	GRX2 TTR TTR1 YDR513W D9719.17	cytosol [GO:0005829]; mitochondrion [GO:0005739]; disulfide oxidoreductase activity [GO:0015036]; electron carrier activity [GO:0009055]; glutathione peroxidase activity [GO:0004602]; glutathione transferase activity [GO:0004364]; protein disulfide oxidoreductase activity [GO:0015035]; cell redox homeostasis [GO:0045454]; cellular response to oxidative stress [GO:0034599]; glutathione metabolic p…	cytosol [GO:0005829]; mitochondrion [GO:0005739]; disulfide oxidoreductase activity [GO:0015036]; electron carrier activity [GO:0009055]; glutathione peroxidase activity [GO:0004602]; glutathione transferase activity [GO:0004364]; protein disulfide oxidoreductase activity [GO:0015035]; cell redox homeostasis [GO:0045454]; cellular response to oxidative stress [GO:0034599]; glutathione metabolic p…	cytosol [GO:0005829]; mitochondrion [GO:0005739]; disulfide oxidoreductase activity [GO:0015036]; electron carrier activity [GO:0009055]; glutathione peroxidase activity [GO:0004602]; glutathione transferase activity [GO:0004364]; protein disulfide oxidoreductase activity [GO:0015035]; cell redox homeostasis [GO:0045454]; cellular response to oxidative stress [GO:0034599]; glutathione metabolic p…	cytosol [GO:0005829]; mitochondrion [GO:0005739]; disulfide oxidoreductase activity [GO:0015036]; electron carrier activity [GO:0009055]; glutathione peroxidase activity [GO:0004602]; glutathione transferase activity [GO:0004364]; protein disulfide oxidoreductase activity [GO:0015035]; cell redox homeostasis [GO:0045454]; cellular response to oxidative stress [GO:0034599]; glutathione metabolic p…
PSA5_YEAST	2.26919	-0.795082	P32379	Proteasome subunit alpha type-5 (EC 3.4.25.1) (Macropain subunit PUP2) (Multicatalytic endopeptidase complex subunit PUP2) (Proteasome component PUP2) (Proteinase YSCE subunit PUP2)	PUP2 DOA5 YGR253C G9155	cytoplasm [GO:0005737]; nuclear outer membrane-endoplasmic reticulum membrane network [GO:0042175]; nucleus [GO:0005634]; proteasome core complex, alpha-subunit complex [GO:0019773]; proteasome storage granule [GO:0034515]; threonine-type endopeptidase activity [GO:0004298]; proteasomal ubiquitin-independent protein catabolic process [GO:0010499]; proteasome-mediated ubiquitin-dependent protein c…	cytoplasm [GO:0005737]; nuclear outer membrane-endoplasmic reticulum membrane network [GO:0042175]; nucleus [GO:0005634]; proteasome core complex, alpha-subunit complex [GO:0019773]; proteasome storage granule [GO:0034515]; threonine-type endopeptidase activity [GO:0004298]; proteasomal ubiquitin-independent protein catabolic process [GO:0010499]; proteasome-mediated ubiquitin-dependent protein c…	cytoplasm [GO:0005737]; nuclear outer membrane-endoplasmic reticulum membrane network [GO:0042175]; nucleus [GO:0005634]; proteasome core complex, alpha-subunit complex [GO:0019773]; proteasome storage granule [GO:0034515]; threonine-type endopeptidase activity [GO:0004298]; proteasomal ubiquitin-independent protein catabolic process [GO:0010499]; proteasome-mediated ubiquitin-dependent protein c…	cytoplasm [GO:0005737]; nuclear outer membrane-endoplasmic reticulum membrane network [GO:0042175]; nucleus [GO:0005634]; proteasome core complex, alpha-subunit complex [GO:0019773]; proteasome storage granule [GO:0034515]; threonine-type endopeptidase activity [GO:0004298]; proteasomal ubiquitin-independent protein catabolic process [GO:0010499]; proteasome-mediated ubiquitin-dependent protein c…
NOP56_YEAST	1.48226	-0.797005	Q12460	Nucleolar protein 56 (Ribosome biosynthesis protein SIK1) (Suppressor of I kappa b protein 1)	NOP56 SIK1 YLR197W L8167.9	box C/D snoRNP complex [GO:0031428]; nucleolus [GO:0005730]; nucleoplasm [GO:0005654]; small-subunit processome [GO:0032040]; snoRNA binding [GO:0030515]; rRNA 2'-O-methylation [GO:0000451]; rRNA methylation [GO:0031167]; rRNA modification [GO:0000154]; rRNA processing [GO:0006364]	box C/D snoRNP complex [GO:0031428]; nucleolus [GO:0005730]; nucleoplasm [GO:0005654]; small-subunit processome [GO:0032040]; snoRNA binding [GO:0030515]; rRNA 2'-O-methylation [GO:0000451]; rRNA methylation [GO:0031167]; rRNA modification [GO:0000154]; rRNA processing [GO:0006364]	box C/D snoRNP complex [GO:0031428]; nucleolus [GO:0005730]; nucleoplasm [GO:0005654]; small-subunit processome [GO:0032040]; snoRNA binding [GO:0030515]; rRNA 2'-O-methylation [GO:0000451]; rRNA methylation [GO:0031167]; rRNA modification [GO:0000154]; rRNA processing [GO:0006364]	box C/D snoRNP complex [GO:0031428]; nucleolus [GO:0005730]; nucleoplasm [GO:0005654]; small-subunit processome [GO:0032040]; snoRNA binding [GO:0030515]; rRNA 2'-O-methylation [GO:0000451]; rRNA methylation [GO:0031167]; rRNA modification [GO:0000154]; rRNA processing [GO:0006364]
QCR7_YEAST	2.13225	-0.812295	P00128	Cytochrome b-c1 complex subunit 7 (Complex III subunit 7) (Complex III subunit VII) (Ubiquinol-cytochrome c reductase c reductase complex 14 kDa protein)	QCR7 CRO1 UCR7 YDR529C D9719.32	mitochondrial respiratory chain complex III [GO:0005750]; aerobic respiration [GO:0009060]; hydrogen ion transmembrane transport [GO:1902600]; mitochondrial electron transport, ubiquinol to cytochrome c [GO:0006122]; mitochondrial respiratory chain complex III assembly [GO:0034551]	mitochondrial respiratory chain complex III [GO:0005750]; aerobic respiration [GO:0009060]; hydrogen ion transmembrane transport [GO:1902600]; mitochondrial electron transport, ubiquinol to cytochrome c [GO:0006122]; mitochondrial respiratory chain complex III assembly [GO:0034551]	mitochondrial respiratory chain complex III [GO:0005750]; aerobic respiration [GO:0009060]; hydrogen ion transmembrane transport [GO:1902600]; mitochondrial electron transport, ubiquinol to cytochrome c [GO:0006122]; mitochondrial respiratory chain complex III assembly [GO:0034551]	mitochondrial respiratory chain complex III [GO:0005750]; aerobic respiration [GO:0009060]; hydrogen ion transmembrane transport [GO:1902600]; mitochondrial electron transport, ubiquinol to cytochrome c [GO:0006122]; mitochondrial respiratory chain complex III assembly [GO:0034551]
SYG_YEAST	1.6313	-0.818345	P38088	Glycine--tRNA ligase 1, mitochondrial (EC 6.1.1.14) (Diadenosine tetraphosphate synthetase) (AP-4-A synthetase) (Glycyl-tRNA synthetase 1) (GlyRS 1) (GlyRS1)	GRS1 YBR121C YBR0917	cytoplasm [GO:0005737]; mitochondrial matrix [GO:0005759]; mitochondrion [GO:0005739]; ATP binding [GO:0005524]; glycine-tRNA ligase activity [GO:0004820]; protein dimerization activity [GO:0046983]; diadenosine tetraphosphate biosynthetic process [GO:0015966]; DNA-templated transcription, termination [GO:0006353]; glycyl-tRNA aminoacylation [GO:0006426]; mitochondrial glycyl-tRNA aminoacylation …	cytoplasm [GO:0005737]; mitochondrial matrix [GO:0005759]; mitochondrion [GO:0005739]; ATP binding [GO:0005524]; glycine-tRNA ligase activity [GO:0004820]; protein dimerization activity [GO:0046983]; diadenosine tetraphosphate biosynthetic process [GO:0015966]; DNA-templated transcription, termination [GO:0006353]; glycyl-tRNA aminoacylation [GO:0006426]; mitochondrial glycyl-tRNA aminoacylation …	cytoplasm [GO:0005737]; mitochondrial matrix [GO:0005759]; mitochondrion [GO:0005739]; ATP binding [GO:0005524]; glycine-tRNA ligase activity [GO:0004820]; protein dimerization activity [GO:0046983]; diadenosine tetraphosphate biosynthetic process [GO:0015966]; DNA-templated transcription, termination [GO:0006353]; glycyl-tRNA aminoacylation [GO:0006426]; mitochondrial glycyl-tRNA aminoacylation …	cytoplasm [GO:0005737]; mitochondrial matrix [GO:0005759]; mitochondrion [GO:0005739]; ATP binding [GO:0005524]; glycine-tRNA ligase activity [GO:0004820]; protein dimerization activity [GO:0046983]; diadenosine tetraphosphate biosynthetic process [GO:0015966]; DNA-templated transcription, termination [GO:0006353]; glycyl-tRNA aminoacylation [GO:0006426]; mitochondrial glycyl-tRNA aminoacylation …
HXT5_YEAST	1.28383	-0.83102	P38695	Probable glucose transporter HXT5	HXT5 YHR096C	integral component of membrane [GO:0016021]; plasma membrane [GO:0005886]; fructose transmembrane transporter activity [GO:0005353]; glucose transmembrane transporter activity [GO:0005355]; mannose transmembrane transporter activity [GO:0015578]; sugar:proton symporter activity [GO:0005351]; glucose import [GO:0046323]; glucose transport [GO:0015758]; hexose transport [GO:0008645]	integral component of membrane [GO:0016021]; plasma membrane [GO:0005886]; fructose transmembrane transporter activity [GO:0005353]; glucose transmembrane transporter activity [GO:0005355]; mannose transmembrane transporter activity [GO:0015578]; sugar:proton symporter activity [GO:0005351]; glucose import [GO:0046323]; glucose transport [GO:0015758]; hexose transport [GO:0008645]	integral component of membrane [GO:0016021]; plasma membrane [GO:0005886]; fructose transmembrane transporter activity [GO:0005353]; glucose transmembrane transporter activity [GO:0005355]; mannose transmembrane transporter activity [GO:0015578]; sugar:proton symporter activity [GO:0005351]; glucose import [GO:0046323]; glucose transport [GO:0015758]; hexose transport [GO:0008645]	integral component of membrane [GO:0016021]; plasma membrane [GO:0005886]; fructose transmembrane transporter activity [GO:0005353]; glucose transmembrane transporter activity [GO:0005355]; mannose transmembrane transporter activity [GO:0015578]; sugar:proton symporter activity [GO:0005351]; glucose import [GO:0046323]; glucose transport [GO:0015758]; hexose transport [GO:0008645]
YP260_YEAST	3.0419	-0.835496	Q08977	UPF0662 protein YPL260W	YPL260W	cytoplasm [GO:0005737]; nucleus [GO:0005634]	cytoplasm [GO:0005737]; nucleus [GO:0005634]	cytoplasm [GO:0005737]; nucleus [GO:0005634]	cytoplasm [GO:0005737]; nucleus [GO:0005634]
DLD1_YEAST	2.51141	-0.837731	P32891	D-lactate dehydrogenase [cytochrome] 1, mitochondrial (EC 1.1.2.4) (D-lactate ferricytochrome C oxidoreductase) (D-LCR)	DLD1 DLD YDL174C	mitochondrial inner membrane [GO:0005743]; mitochondrial intermembrane space [GO:0005758]; mitochondrion [GO:0005739]; D-lactate dehydrogenase (cytochrome) activity [GO:0004458]; flavin adenine dinucleotide binding [GO:0050660]; lactate catabolic process [GO:1903457]; protein targeting to mitochondrion [GO:0006626]	mitochondrial inner membrane [GO:0005743]; mitochondrial intermembrane space [GO:0005758]; mitochondrion [GO:0005739]; D-lactate dehydrogenase (cytochrome) activity [GO:0004458]; flavin adenine dinucleotide binding [GO:0050660]; lactate catabolic process [GO:1903457]; protein targeting to mitochondrion [GO:0006626]	mitochondrial inner membrane [GO:0005743]; mitochondrial intermembrane space [GO:0005758]; mitochondrion [GO:0005739]; D-lactate dehydrogenase (cytochrome) activity [GO:0004458]; flavin adenine dinucleotide binding [GO:0050660]; lactate catabolic process [GO:1903457]; protein targeting to mitochondrion [GO:0006626]	mitochondrial inner membrane [GO:0005743]; mitochondrial intermembrane space [GO:0005758]; mitochondrion [GO:0005739]; D-lactate dehydrogenase (cytochrome) activity [GO:0004458]; flavin adenine dinucleotide binding [GO:0050660]; lactate catabolic process [GO:1903457]; protein targeting to mitochondrion [GO:0006626]
XPO1_YEAST	1.78329	-0.838579	P30822	Exportin-1 (Chromosome region maintenance protein 1) (Karyopherin-124)	CRM1 KAP124 XPO1 YGR218W G8514	kinetochore [GO:0000776]; nucleus [GO:0005634]; perinuclear region of cytoplasm [GO:0048471]; spindle pole body [GO:0005816]; protein transporter activity [GO:0008565]; Ran GTPase binding [GO:0008536]; mRNA export from nucleus [GO:0006406]; protein export from nucleus [GO:0006611]; protein localization to kinetochore [GO:0034501]; ribosomal large subunit export from nucleus [GO:0000055]	kinetochore [GO:0000776]; nucleus [GO:0005634]; perinuclear region of cytoplasm [GO:0048471]; spindle pole body [GO:0005816]; protein transporter activity [GO:0008565]; Ran GTPase binding [GO:0008536]; mRNA export from nucleus [GO:0006406]; protein export from nucleus [GO:0006611]; protein localization to kinetochore [GO:0034501]; ribosomal large subunit export from nucleus [GO:0000055]	kinetochore [GO:0000776]; nucleus [GO:0005634]; perinuclear region of cytoplasm [GO:0048471]; spindle pole body [GO:0005816]; protein transporter activity [GO:0008565]; Ran GTPase binding [GO:0008536]; mRNA export from nucleus [GO:0006406]; protein export from nucleus [GO:0006611]; protein localization to kinetochore [GO:0034501]; ribosomal large subunit export from nucleus [GO:0000055]	kinetochore [GO:0000776]; nucleus [GO:0005634]; perinuclear region of cytoplasm [GO:0048471]; spindle pole body [GO:0005816]; protein transporter activity [GO:0008565]; Ran GTPase binding [GO:0008536]; mRNA export from nucleus [GO:0006406]; protein export from nucleus [GO:0006611]; protein localization to kinetochore [GO:0034501]; ribosomal large subunit export from nucleus [GO:0000055]
PYRX_YEAST	2.07085	-0.839571	P30402	Orotate phosphoribosyltransferase 2 (OPRT 2) (OPRTase 2) (EC 2.4.2.10)	URA10 YMR271C YM8156.13C	orotate phosphoribosyltransferase activity [GO:0004588]; 'de novo' pyrimidine nucleobase biosynthetic process [GO:0006207]; 'de novo' UMP biosynthetic process [GO:0044205]; pyrimidine ribonucleoside biosynthetic process [GO:0046132]	orotate phosphoribosyltransferase activity [GO:0004588]; 'de novo' pyrimidine nucleobase biosynthetic process [GO:0006207]; 'de novo' UMP biosynthetic process [GO:0044205]; pyrimidine ribonucleoside biosynthetic process [GO:0046132]	orotate phosphoribosyltransferase activity [GO:0004588]; 'de novo' pyrimidine nucleobase biosynthetic process [GO:0006207]; 'de novo' UMP biosynthetic process [GO:0044205]; pyrimidine ribonucleoside biosynthetic process [GO:0046132]	orotate phosphoribosyltransferase activity [GO:0004588]; 'de novo' pyrimidine nucleobase biosynthetic process [GO:0006207]; 'de novo' UMP biosynthetic process [GO:0044205]; pyrimidine ribonucleoside biosynthetic process [GO:0046132]
RGI1_YEAST	2.46218	-0.841478	P40043	Respiratory growth induced protein 1	RGI1 YER067W	cell periphery [GO:0071944]; plasma membrane [GO:0005886]; energy reserve metabolic process [GO:0006112]	cell periphery [GO:0071944]; plasma membrane [GO:0005886]; energy reserve metabolic process [GO:0006112]	cell periphery [GO:0071944]; plasma membrane [GO:0005886]; energy reserve metabolic process [GO:0006112]	cell periphery [GO:0071944]; plasma membrane [GO:0005886]; energy reserve metabolic process [GO:0006112]
G6PD_YEAST	3.01531	-0.859151	P11412	Glucose-6-phosphate 1-dehydrogenase (G6PD) (EC 1.1.1.49)	ZWF1 MET19 YNL241C N1110	glucose-6-phosphate dehydrogenase activity [GO:0004345]; NADP binding [GO:0050661]; glucose metabolic process [GO:0006006]; NADPH regeneration [GO:0006740]; pentose-phosphate shunt, oxidative branch [GO:0009051]; response to hydrogen peroxide [GO:0042542]	glucose-6-phosphate dehydrogenase activity [GO:0004345]; NADP binding [GO:0050661]; glucose metabolic process [GO:0006006]; NADPH regeneration [GO:0006740]; pentose-phosphate shunt, oxidative branch [GO:0009051]; response to hydrogen peroxide [GO:0042542]	glucose-6-phosphate dehydrogenase activity [GO:0004345]; NADP binding [GO:0050661]; glucose metabolic process [GO:0006006]; NADPH regeneration [GO:0006740]; pentose-phosphate shunt, oxidative branch [GO:0009051]; response to hydrogen peroxide [GO:0042542]	glucose-6-phosphate dehydrogenase activity [GO:0004345]; NADP binding [GO:0050661]; glucose metabolic process [GO:0006006]; NADPH regeneration [GO:0006740]; pentose-phosphate shunt, oxidative branch [GO:0009051]; response to hydrogen peroxide [GO:0042542]
NNRD_YEAST	2.734	-0.869908	P36059	ATP-dependent (S)-NAD(P)H-hydrate dehydratase (EC 4.2.1.93) (ATP-dependent NAD(P)HX dehydratase)	YKL151C YKL606	cytoplasm [GO:0005737]; ADP-dependent NAD(P)H-hydrate dehydratase activity [GO:0052855]; ATP binding [GO:0005524]; ATP-dependent NAD(P)H-hydrate dehydratase activity [GO:0047453]; nicotinamide nucleotide metabolic process [GO:0046496]	cytoplasm [GO:0005737]; ADP-dependent NAD(P)H-hydrate dehydratase activity [GO:0052855]; ATP binding [GO:0005524]; ATP-dependent NAD(P)H-hydrate dehydratase activity [GO:0047453]; nicotinamide nucleotide metabolic process [GO:0046496]	cytoplasm [GO:0005737]; ADP-dependent NAD(P)H-hydrate dehydratase activity [GO:0052855]; ATP binding [GO:0005524]; ATP-dependent NAD(P)H-hydrate dehydratase activity [GO:0047453]; nicotinamide nucleotide metabolic process [GO:0046496]	cytoplasm [GO:0005737]; ADP-dependent NAD(P)H-hydrate dehydratase activity [GO:0052855]; ATP binding [GO:0005524]; ATP-dependent NAD(P)H-hydrate dehydratase activity [GO:0047453]; nicotinamide nucleotide metabolic process [GO:0046496]
GABAT_YEAST	2.8773	-0.875196	P17649	4-aminobutyrate aminotransferase (EC 2.6.1.19) (GABA aminotransferase) (GABA-AT) (Gamma-amino-N-butyrate transaminase) (GABA transaminase)	UGA1 YGR019W	cytosol [GO:0005829]; 4-aminobutyrate transaminase activity [GO:0003867]; pyridoxal phosphate binding [GO:0030170]; gamma-aminobutyric acid catabolic process [GO:0009450]	cytosol [GO:0005829]; 4-aminobutyrate transaminase activity [GO:0003867]; pyridoxal phosphate binding [GO:0030170]; gamma-aminobutyric acid catabolic process [GO:0009450]	cytosol [GO:0005829]; 4-aminobutyrate transaminase activity [GO:0003867]; pyridoxal phosphate binding [GO:0030170]; gamma-aminobutyric acid catabolic process [GO:0009450]	cytosol [GO:0005829]; 4-aminobutyrate transaminase activity [GO:0003867]; pyridoxal phosphate binding [GO:0030170]; gamma-aminobutyric acid catabolic process [GO:0009450]
RPN2_YEAST	2.5278	-0.885667	P32565	26S proteasome regulatory subunit RPN2	RPN2 SEN3 YIL075C	nucleus [GO:0005634]; proteasome regulatory particle, base subcomplex [GO:0008540]; proteasome storage granule [GO:0034515]; enzyme regulator activity [GO:0030234]; protein binding, bridging [GO:0030674]; proteasome assembly [GO:0043248]; regulation of protein catabolic process [GO:0042176]; ubiquitin-dependent protein catabolic process [GO:0006511]	nucleus [GO:0005634]; proteasome regulatory particle, base subcomplex [GO:0008540]; proteasome storage granule [GO:0034515]; enzyme regulator activity [GO:0030234]; protein binding, bridging [GO:0030674]; proteasome assembly [GO:0043248]; regulation of protein catabolic process [GO:0042176]; ubiquitin-dependent protein catabolic process [GO:0006511]	nucleus [GO:0005634]; proteasome regulatory particle, base subcomplex [GO:0008540]; proteasome storage granule [GO:0034515]; enzyme regulator activity [GO:0030234]; protein binding, bridging [GO:0030674]; proteasome assembly [GO:0043248]; regulation of protein catabolic process [GO:0042176]; ubiquitin-dependent protein catabolic process [GO:0006511]	nucleus [GO:0005634]; proteasome regulatory particle, base subcomplex [GO:0008540]; proteasome storage granule [GO:0034515]; enzyme regulator activity [GO:0030234]; protein binding, bridging [GO:0030674]; proteasome assembly [GO:0043248]; regulation of protein catabolic process [GO:0042176]; ubiquitin-dependent protein catabolic process [GO:0006511]
COPA_YEAST	2.03279	-0.88799	P53622	Coatomer subunit alpha (Alpha-coat protein) (Alpha-COP) (Retrieval from endoplasmic reticulum protein 1) (Secretory protein 22) (Suppressor of osmo-sensitivity 1)	COP1 RET1 SEC33 SOO1 YDL145C D1578	COPI vesicle coat [GO:0030126]; Golgi membrane [GO:0000139]; structural molecule activity [GO:0005198]; ubiquitin binding [GO:0043130]; ER to Golgi vesicle-mediated transport [GO:0006888]; intra-Golgi vesicle-mediated transport [GO:0006891]; intracellular protein transport [GO:0006886]; retrograde vesicle-mediated transport, Golgi to ER [GO:0006890]	COPI vesicle coat [GO:0030126]; Golgi membrane [GO:0000139]; structural molecule activity [GO:0005198]; ubiquitin binding [GO:0043130]; ER to Golgi vesicle-mediated transport [GO:0006888]; intra-Golgi vesicle-mediated transport [GO:0006891]; intracellular protein transport [GO:0006886]; retrograde vesicle-mediated transport, Golgi to ER [GO:0006890]	COPI vesicle coat [GO:0030126]; Golgi membrane [GO:0000139]; structural molecule activity [GO:0005198]; ubiquitin binding [GO:0043130]; ER to Golgi vesicle-mediated transport [GO:0006888]; intra-Golgi vesicle-mediated transport [GO:0006891]; intracellular protein transport [GO:0006886]; retrograde vesicle-mediated transport, Golgi to ER [GO:0006890]	COPI vesicle coat [GO:0030126]; Golgi membrane [GO:0000139]; structural molecule activity [GO:0005198]; ubiquitin binding [GO:0043130]; ER to Golgi vesicle-mediated transport [GO:0006888]; intra-Golgi vesicle-mediated transport [GO:0006891]; intracellular protein transport [GO:0006886]; retrograde vesicle-mediated transport, Golgi to ER [GO:0006890]
RTN2_YEAST	2.19368	-0.896641	Q12443	Reticulon-like protein 2	RTN2 YDL204W D1062	cortical endoplasmic reticulum [GO:0032541]; endoplasmic reticulum membrane [GO:0005789]; endoplasmic reticulum tubular network [GO:0071782]; integral component of membrane [GO:0016021]; endoplasmic reticulum inheritance [GO:0048309]; endoplasmic reticulum tubular network maintenance [GO:0071788]; endoplasmic reticulum tubular network organization [GO:0071786]; ER-dependent peroxisome organizatio…	cortical endoplasmic reticulum [GO:0032541]; endoplasmic reticulum membrane [GO:0005789]; endoplasmic reticulum tubular network [GO:0071782]; integral component of membrane [GO:0016021]; endoplasmic reticulum inheritance [GO:0048309]; endoplasmic reticulum tubular network maintenance [GO:0071788]; endoplasmic reticulum tubular network organization [GO:0071786]; ER-dependent peroxisome organizatio…	cortical endoplasmic reticulum [GO:0032541]; endoplasmic reticulum membrane [GO:0005789]; endoplasmic reticulum tubular network [GO:0071782]; integral component of membrane [GO:0016021]; endoplasmic reticulum inheritance [GO:0048309]; endoplasmic reticulum tubular network maintenance [GO:0071788]; endoplasmic reticulum tubular network organization [GO:0071786]; ER-dependent peroxisome organizatio…	cortical endoplasmic reticulum [GO:0032541]; endoplasmic reticulum membrane [GO:0005789]; endoplasmic reticulum tubular network [GO:0071782]; integral component of membrane [GO:0016021]; endoplasmic reticulum inheritance [GO:0048309]; endoplasmic reticulum tubular network maintenance [GO:0071788]; endoplasmic reticulum tubular network organization [GO:0071786]; ER-dependent peroxisome organizatio…
VAC8_YEAST	1.81968	-0.905368	P39968	Vacuolar protein 8	VAC8 YEB3 YEL013W	fungal-type vacuole membrane [GO:0000329]; Myo2p-Vac17p-Vac8p transport complex [GO:0071563]; nucleus [GO:0005634]; nucleus-vacuole junction [GO:0071561]; protein anchor [GO:0043495]; CVT vesicle assembly [GO:0071255]; macroautophagy [GO:0016236]; nucleus-vacuole junction assembly [GO:0071562]; piecemeal microautophagy of nucleus [GO:0034727]; vacuole fusion, non-autophagic [GO:0042144]; vacuole …	fungal-type vacuole membrane [GO:0000329]; Myo2p-Vac17p-Vac8p transport complex [GO:0071563]; nucleus [GO:0005634]; nucleus-vacuole junction [GO:0071561]; protein anchor [GO:0043495]; CVT vesicle assembly [GO:0071255]; macroautophagy [GO:0016236]; nucleus-vacuole junction assembly [GO:0071562]; piecemeal microautophagy of nucleus [GO:0034727]; vacuole fusion, non-autophagic [GO:0042144]; vacuole …	fungal-type vacuole membrane [GO:0000329]; Myo2p-Vac17p-Vac8p transport complex [GO:0071563]; nucleus [GO:0005634]; nucleus-vacuole junction [GO:0071561]; protein anchor [GO:0043495]; CVT vesicle assembly [GO:0071255]; macroautophagy [GO:0016236]; nucleus-vacuole junction assembly [GO:0071562]; piecemeal microautophagy of nucleus [GO:0034727]; vacuole fusion, non-autophagic [GO:0042144]; vacuole …	fungal-type vacuole membrane [GO:0000329]; Myo2p-Vac17p-Vac8p transport complex [GO:0071563]; nucleus [GO:0005634]; nucleus-vacuole junction [GO:0071561]; protein anchor [GO:0043495]; CVT vesicle assembly [GO:0071255]; macroautophagy [GO:0016236]; nucleus-vacuole junction assembly [GO:0071562]; piecemeal microautophagy of nucleus [GO:0034727]; vacuole fusion, non-autophagic [GO:0042144]; vacuole …
ODO1_YEAST	1.43213	-0.90696	P20967	2-oxoglutarate dehydrogenase, mitochondrial (EC 1.2.4.2) (2-oxoglutarate dehydrogenase complex component E1) (OGDC-E1) (Alpha-ketoglutarate dehydrogenase)	KGD1 OGD1 YIL125W	mitochondrial nucleoid [GO:0042645]; mitochondrial oxoglutarate dehydrogenase complex [GO:0009353]; oxoglutarate dehydrogenase (succinyl-transferring) activity [GO:0004591]; thiamine pyrophosphate binding [GO:0030976]; 2-oxoglutarate metabolic process [GO:0006103]; tricarboxylic acid cycle [GO:0006099]	mitochondrial nucleoid [GO:0042645]; mitochondrial oxoglutarate dehydrogenase complex [GO:0009353]; oxoglutarate dehydrogenase (succinyl-transferring) activity [GO:0004591]; thiamine pyrophosphate binding [GO:0030976]; 2-oxoglutarate metabolic process [GO:0006103]; tricarboxylic acid cycle [GO:0006099]	mitochondrial nucleoid [GO:0042645]; mitochondrial oxoglutarate dehydrogenase complex [GO:0009353]; oxoglutarate dehydrogenase (succinyl-transferring) activity [GO:0004591]; thiamine pyrophosphate binding [GO:0030976]; 2-oxoglutarate metabolic process [GO:0006103]; tricarboxylic acid cycle [GO:0006099]	mitochondrial nucleoid [GO:0042645]; mitochondrial oxoglutarate dehydrogenase complex [GO:0009353]; oxoglutarate dehydrogenase (succinyl-transferring) activity [GO:0004591]; thiamine pyrophosphate binding [GO:0030976]; 2-oxoglutarate metabolic process [GO:0006103]; tricarboxylic acid cycle [GO:0006099]
SYIC_YEAST	1.66412	-0.910517	P09436	Isoleucine--tRNA ligase, cytoplasmic (EC 6.1.1.5) (Isoleucyl-tRNA synthetase) (IleRS)	ILS1 YBL076C YBL0734	cytosol [GO:0005829]; aminoacyl-tRNA editing activity [GO:0002161]; ATP binding [GO:0005524]; isoleucine-tRNA ligase activity [GO:0004822]; tRNA binding [GO:0000049]; isoleucyl-tRNA aminoacylation [GO:0006428]; response to cadmium ion [GO:0046686]	cytosol [GO:0005829]; aminoacyl-tRNA editing activity [GO:0002161]; ATP binding [GO:0005524]; isoleucine-tRNA ligase activity [GO:0004822]; tRNA binding [GO:0000049]; isoleucyl-tRNA aminoacylation [GO:0006428]; response to cadmium ion [GO:0046686]	cytosol [GO:0005829]; aminoacyl-tRNA editing activity [GO:0002161]; ATP binding [GO:0005524]; isoleucine-tRNA ligase activity [GO:0004822]; tRNA binding [GO:0000049]; isoleucyl-tRNA aminoacylation [GO:0006428]; response to cadmium ion [GO:0046686]	cytosol [GO:0005829]; aminoacyl-tRNA editing activity [GO:0002161]; ATP binding [GO:0005524]; isoleucine-tRNA ligase activity [GO:0004822]; tRNA binding [GO:0000049]; isoleucyl-tRNA aminoacylation [GO:0006428]; response to cadmium ion [GO:0046686]
CBF5_YEAST	2.51167	-0.923229	P33322	H/ACA ribonucleoprotein complex subunit 4 (EC 5.4.99.-) (Centromere-binding factor 5) (Centromere/microtubule-binding protein CBF5) (H/ACA snoRNP protein CBF5) (Small nucleolar RNP protein CBF5) (p64')	CBF5 YLR175W L9470.11	box H/ACA snoRNP complex [GO:0031429]; chromosome, centromeric region [GO:0000775]; cytoplasm [GO:0005737]; microtubule [GO:0005874]; nucleolus [GO:0005730]; DNA binding [GO:0003677]; pseudouridine synthase activity [GO:0009982]; RNA binding [GO:0003723]; box H/ACA snoRNA 3'-end processing [GO:0000495]; cell division [GO:0051301]; mitotic nuclear division [GO:0007067]; mRNA pseudouridine synthesi…	box H/ACA snoRNP complex [GO:0031429]; chromosome, centromeric region [GO:0000775]; cytoplasm [GO:0005737]; microtubule [GO:0005874]; nucleolus [GO:0005730]; DNA binding [GO:0003677]; pseudouridine synthase activity [GO:0009982]; RNA binding [GO:0003723]; box H/ACA snoRNA 3'-end processing [GO:0000495]; cell division [GO:0051301]; mitotic nuclear division [GO:0007067]; mRNA pseudouridine synthesi…	box H/ACA snoRNP complex [GO:0031429]; chromosome, centromeric region [GO:0000775]; cytoplasm [GO:0005737]; microtubule [GO:0005874]; nucleolus [GO:0005730]; DNA binding [GO:0003677]; pseudouridine synthase activity [GO:0009982]; RNA binding [GO:0003723]; box H/ACA snoRNA 3'-end processing [GO:0000495]; cell division [GO:0051301]; mitotic nuclear division [GO:0007067]; mRNA pseudouridine synthesi…	box H/ACA snoRNP complex [GO:0031429]; chromosome, centromeric region [GO:0000775]; cytoplasm [GO:0005737]; microtubule [GO:0005874]; nucleolus [GO:0005730]; DNA binding [GO:0003677]; pseudouridine synthase activity [GO:0009982]; RNA binding [GO:0003723]; box H/ACA snoRNA 3'-end processing [GO:0000495]; cell division [GO:0051301]; mitotic nuclear division [GO:0007067]; mRNA pseudouridine synthesi…
TPS2_YEAST	1.55237	-0.955065	P31688	Trehalose-phosphatase (EC 3.1.3.12) (Trehalose synthase complex catalytic subunit TPS2) (Trehalose-6-phosphate phosphatase) (TPP)	TPS2 PFK3 YDR074W YD8554.07	alpha,alpha-trehalose-phosphate synthase complex (UDP-forming) [GO:0005946]; trehalose-phosphatase activity [GO:0004805]; cellular response to heat [GO:0034605]; trehalose biosynthetic process [GO:0005992]; trehalose metabolism in response to stress [GO:0070413]	alpha,alpha-trehalose-phosphate synthase complex (UDP-forming) [GO:0005946]; trehalose-phosphatase activity [GO:0004805]; cellular response to heat [GO:0034605]; trehalose biosynthetic process [GO:0005992]; trehalose metabolism in response to stress [GO:0070413]	alpha,alpha-trehalose-phosphate synthase complex (UDP-forming) [GO:0005946]; trehalose-phosphatase activity [GO:0004805]; cellular response to heat [GO:0034605]; trehalose biosynthetic process [GO:0005992]; trehalose metabolism in response to stress [GO:0070413]	alpha,alpha-trehalose-phosphate synthase complex (UDP-forming) [GO:0005946]; trehalose-phosphatase activity [GO:0004805]; cellular response to heat [GO:0034605]; trehalose biosynthetic process [GO:0005992]; trehalose metabolism in response to stress [GO:0070413]
YHI0_YEAST	3.49445	-0.960751	P38708	Putative proline--tRNA ligase YHR020W (EC 6.1.1.15) (Prolyl-tRNA synthetase) (ProRS)	YHR020W	aminoacyl-tRNA synthetase multienzyme complex [GO:0017101]; cytoplasm [GO:0005737]; aminoacyl-tRNA editing activity [GO:0002161]; ATP binding [GO:0005524]; proline-tRNA ligase activity [GO:0004827]; prolyl-tRNA aminoacylation [GO:0006433]	aminoacyl-tRNA synthetase multienzyme complex [GO:0017101]; cytoplasm [GO:0005737]; aminoacyl-tRNA editing activity [GO:0002161]; ATP binding [GO:0005524]; proline-tRNA ligase activity [GO:0004827]; prolyl-tRNA aminoacylation [GO:0006433]	aminoacyl-tRNA synthetase multienzyme complex [GO:0017101]; cytoplasm [GO:0005737]; aminoacyl-tRNA editing activity [GO:0002161]; ATP binding [GO:0005524]; proline-tRNA ligase activity [GO:0004827]; prolyl-tRNA aminoacylation [GO:0006433]	aminoacyl-tRNA synthetase multienzyme complex [GO:0017101]; cytoplasm [GO:0005737]; aminoacyl-tRNA editing activity [GO:0002161]; ATP binding [GO:0005524]; proline-tRNA ligase activity [GO:0004827]; prolyl-tRNA aminoacylation [GO:0006433]
CLH_YEAST	1.64666	-0.98491	P22137	Clathrin heavy chain	CHC1 YGL206C	clathrin coat of coated pit [GO:0030132]; clathrin coat of trans-Golgi network vesicle [GO:0030130]; clathrin vesicle coat [GO:0030125]; cytosol [GO:0005829]; structural molecule activity [GO:0005198]; endocytosis [GO:0006897]; Golgi to endosome transport [GO:0006895]; intracellular protein transport [GO:0006886]	clathrin coat of coated pit [GO:0030132]; clathrin coat of trans-Golgi network vesicle [GO:0030130]; clathrin vesicle coat [GO:0030125]; cytosol [GO:0005829]; structural molecule activity [GO:0005198]; endocytosis [GO:0006897]; Golgi to endosome transport [GO:0006895]; intracellular protein transport [GO:0006886]	clathrin coat of coated pit [GO:0030132]; clathrin coat of trans-Golgi network vesicle [GO:0030130]; clathrin vesicle coat [GO:0030125]; cytosol [GO:0005829]; structural molecule activity [GO:0005198]; endocytosis [GO:0006897]; Golgi to endosome transport [GO:0006895]; intracellular protein transport [GO:0006886]	clathrin coat of coated pit [GO:0030132]; clathrin coat of trans-Golgi network vesicle [GO:0030130]; clathrin vesicle coat [GO:0030125]; cytosol [GO:0005829]; structural molecule activity [GO:0005198]; endocytosis [GO:0006897]; Golgi to endosome transport [GO:0006895]; intracellular protein transport [GO:0006886]
HBT1_YEAST	2.86819	-1.00276	Q07653	Protein HBT1 (HUB1 target protein 1)	HBT1 Crem YDL223C	cytoplasm [GO:0005737]; mating projection [GO:0005937]; cell morphogenesis involved in conjugation with cellular fusion [GO:0000753]; regulation of cell shape [GO:0008360]	cytoplasm [GO:0005737]; mating projection [GO:0005937]; cell morphogenesis involved in conjugation with cellular fusion [GO:0000753]; regulation of cell shape [GO:0008360]	cytoplasm [GO:0005737]; mating projection [GO:0005937]; cell morphogenesis involved in conjugation with cellular fusion [GO:0000753]; regulation of cell shape [GO:0008360]	cytoplasm [GO:0005737]; mating projection [GO:0005937]; cell morphogenesis involved in conjugation with cellular fusion [GO:0000753]; regulation of cell shape [GO:0008360]
VATH_YEAST	3.65367	-1.01086	P41807	V-type proton ATPase subunit H (V-ATPase subunit H) (V-ATPase 54 kDa subunit) (Vacuolar proton pump subunit H)	VMA13 CLS11 YPR036W YP3085.02	fungal-type vacuole membrane [GO:0000329]; vacuolar proton-transporting V-type ATPase, V1 domain [GO:0000221]; proton-transporting ATPase activity, rotational mechanism [GO:0046961]; ATP hydrolysis coupled proton transport [GO:0015991]; vacuolar acidification [GO:0007035]	fungal-type vacuole membrane [GO:0000329]; vacuolar proton-transporting V-type ATPase, V1 domain [GO:0000221]; proton-transporting ATPase activity, rotational mechanism [GO:0046961]; ATP hydrolysis coupled proton transport [GO:0015991]; vacuolar acidification [GO:0007035]	fungal-type vacuole membrane [GO:0000329]; vacuolar proton-transporting V-type ATPase, V1 domain [GO:0000221]; proton-transporting ATPase activity, rotational mechanism [GO:0046961]; ATP hydrolysis coupled proton transport [GO:0015991]; vacuolar acidification [GO:0007035]	fungal-type vacuole membrane [GO:0000329]; vacuolar proton-transporting V-type ATPase, V1 domain [GO:0000221]; proton-transporting ATPase activity, rotational mechanism [GO:0046961]; ATP hydrolysis coupled proton transport [GO:0015991]; vacuolar acidification [GO:0007035]
DHE2_YEAST	2.26758	-1.04189	P33327	NAD-specific glutamate dehydrogenase (NAD-GDH) (EC 1.4.1.2)	GDH2 YDL215C D0892	glutamate dehydrogenase (NAD+) activity [GO:0004352]; glutamate catabolic process to 2-oxoglutarate [GO:0019551]; nitrogen compound metabolic process [GO:0006807]	glutamate dehydrogenase (NAD+) activity [GO:0004352]; glutamate catabolic process to 2-oxoglutarate [GO:0019551]; nitrogen compound metabolic process [GO:0006807]	glutamate dehydrogenase (NAD+) activity [GO:0004352]; glutamate catabolic process to 2-oxoglutarate [GO:0019551]; nitrogen compound metabolic process [GO:0006807]	glutamate dehydrogenase (NAD+) activity [GO:0004352]; glutamate catabolic process to 2-oxoglutarate [GO:0019551]; nitrogen compound metabolic process [GO:0006807]
TCB3_YEAST	2.1889	-1.04346	Q03640	Tricalbin-3	TCB3 YML072C	cellular bud [GO:0005933]; cortical endoplasmic reticulum [GO:0032541]; integral component of membrane [GO:0016021]; calcium-dependent phospholipid binding [GO:0005544]; lipid binding [GO:0008289]; metal ion binding [GO:0046872]; endoplasmic reticulum membrane organization [GO:0090158]; regulation of phosphatidylinositol dephosphorylation [GO:0060304]	cellular bud [GO:0005933]; cortical endoplasmic reticulum [GO:0032541]; integral component of membrane [GO:0016021]; calcium-dependent phospholipid binding [GO:0005544]; lipid binding [GO:0008289]; metal ion binding [GO:0046872]; endoplasmic reticulum membrane organization [GO:0090158]; regulation of phosphatidylinositol dephosphorylation [GO:0060304]	cellular bud [GO:0005933]; cortical endoplasmic reticulum [GO:0032541]; integral component of membrane [GO:0016021]; calcium-dependent phospholipid binding [GO:0005544]; lipid binding [GO:0008289]; metal ion binding [GO:0046872]; endoplasmic reticulum membrane organization [GO:0090158]; regulation of phosphatidylinositol dephosphorylation [GO:0060304]	cellular bud [GO:0005933]; cortical endoplasmic reticulum [GO:0032541]; integral component of membrane [GO:0016021]; calcium-dependent phospholipid binding [GO:0005544]; lipid binding [GO:0008289]; metal ion binding [GO:0046872]; endoplasmic reticulum membrane organization [GO:0090158]; regulation of phosphatidylinositol dephosphorylation [GO:0060304]
SYQ_YEAST	2.32616	-1.06401	P13188	Glutamine--tRNA ligase (EC 6.1.1.18) (Glutaminyl-tRNA synthetase) (GlnRS)	GLN4 YOR168W O3601	cytosol [GO:0005829]; mitochondrion [GO:0005739]; ATP binding [GO:0005524]; glutamine-tRNA ligase activity [GO:0004819]; glutaminyl-tRNA aminoacylation [GO:0006425]	cytosol [GO:0005829]; mitochondrion [GO:0005739]; ATP binding [GO:0005524]; glutamine-tRNA ligase activity [GO:0004819]; glutaminyl-tRNA aminoacylation [GO:0006425]	cytosol [GO:0005829]; mitochondrion [GO:0005739]; ATP binding [GO:0005524]; glutamine-tRNA ligase activity [GO:0004819]; glutaminyl-tRNA aminoacylation [GO:0006425]	cytosol [GO:0005829]; mitochondrion [GO:0005739]; ATP binding [GO:0005524]; glutamine-tRNA ligase activity [GO:0004819]; glutaminyl-tRNA aminoacylation [GO:0006425]
TREA_YEAST	3.78598	-1.06614	P32356	Neutral trehalase (EC 3.2.1.28) (Alpha,alpha-trehalase) (Alpha,alpha-trehalose glucohydrolase)	NTH1 NTH YDR001C YD8119.07C	cytoplasm [GO:0005737]; alpha,alpha-trehalase activity [GO:0004555]; calcium ion binding [GO:0005509]; cellular response to desiccation [GO:0071465]; trehalose catabolic process [GO:0005993]	cytoplasm [GO:0005737]; alpha,alpha-trehalase activity [GO:0004555]; calcium ion binding [GO:0005509]; cellular response to desiccation [GO:0071465]; trehalose catabolic process [GO:0005993]	cytoplasm [GO:0005737]; alpha,alpha-trehalase activity [GO:0004555]; calcium ion binding [GO:0005509]; cellular response to desiccation [GO:0071465]; trehalose catabolic process [GO:0005993]	cytoplasm [GO:0005737]; alpha,alpha-trehalase activity [GO:0004555]; calcium ion binding [GO:0005509]; cellular response to desiccation [GO:0071465]; trehalose catabolic process [GO:0005993]
ATPO_YEAST	1.99648	-1.07462	P09457	ATP synthase subunit 5, mitochondrial (ATP synthase chain 5) (Oligomycin sensitivity conferral protein) (OSCP)	ATP5 OSCP YDR298C D9740.11	mitochondrial proton-transporting ATP synthase, stator stalk [GO:0000274]; proton-transporting ATP synthase activity, rotational mechanism [GO:0046933]; ATP synthesis coupled proton transport [GO:0015986]	mitochondrial proton-transporting ATP synthase, stator stalk [GO:0000274]; proton-transporting ATP synthase activity, rotational mechanism [GO:0046933]; ATP synthesis coupled proton transport [GO:0015986]	mitochondrial proton-transporting ATP synthase, stator stalk [GO:0000274]; proton-transporting ATP synthase activity, rotational mechanism [GO:0046933]; ATP synthesis coupled proton transport [GO:0015986]	mitochondrial proton-transporting ATP synthase, stator stalk [GO:0000274]; proton-transporting ATP synthase activity, rotational mechanism [GO:0046933]; ATP synthesis coupled proton transport [GO:0015986]
HSP30_YEAST	1.19471	-1.12397	P25619	30 kDa heat shock protein	HSP30 YCR021C YCR21C	integral component of membrane [GO:0016021]; plasma membrane [GO:0005886]; ion channel activity [GO:0005216]; cellular response to DNA damage stimulus [GO:0006974]; cellular response to ethanol [GO:0071361]; cellular response to heat [GO:0034605]; cellular response to hydrogen peroxide [GO:0070301]; cellular response to osmotic stress [GO:0071470]; negative regulation of ATPase activity [GO:00327…	integral component of membrane [GO:0016021]; plasma membrane [GO:0005886]; ion channel activity [GO:0005216]; cellular response to DNA damage stimulus [GO:0006974]; cellular response to ethanol [GO:0071361]; cellular response to heat [GO:0034605]; cellular response to hydrogen peroxide [GO:0070301]; cellular response to osmotic stress [GO:0071470]; negative regulation of ATPase activity [GO:00327…	integral component of membrane [GO:0016021]; plasma membrane [GO:0005886]; ion channel activity [GO:0005216]; cellular response to DNA damage stimulus [GO:0006974]; cellular response to ethanol [GO:0071361]; cellular response to heat [GO:0034605]; cellular response to hydrogen peroxide [GO:0070301]; cellular response to osmotic stress [GO:0071470]; negative regulation of ATPase activity [GO:00327…	integral component of membrane [GO:0016021]; plasma membrane [GO:0005886]; ion channel activity [GO:0005216]; cellular response to DNA damage stimulus [GO:0006974]; cellular response to ethanol [GO:0071361]; cellular response to heat [GO:0034605]; cellular response to hydrogen peroxide [GO:0070301]; cellular response to osmotic stress [GO:0071470]; negative regulation of ATPase activity [GO:00327…
HRI1_YEAST	1.70086	-1.13999	Q05905	Protein HRI1 (HRR25-interacting protein 1)	HRI1 YLR301W	endoplasmic reticulum membrane [GO:0005789]; nucleus [GO:0005634]; cotranslational protein targeting to membrane [GO:0006613]	endoplasmic reticulum membrane [GO:0005789]; nucleus [GO:0005634]; cotranslational protein targeting to membrane [GO:0006613]	endoplasmic reticulum membrane [GO:0005789]; nucleus [GO:0005634]; cotranslational protein targeting to membrane [GO:0006613]	endoplasmic reticulum membrane [GO:0005789]; nucleus [GO:0005634]; cotranslational protein targeting to membrane [GO:0006613]
COPB_YEAST	2.79653	-1.17423	P41810	Coatomer subunit beta (Beta-coat protein) (Beta-COP)	SEC26 YDR238C YD8419.05C	coated vesicle [GO:0030135]; COPI vesicle coat [GO:0030126]; Golgi membrane [GO:0000139]; structural molecule activity [GO:0005198]; ER to Golgi vesicle-mediated transport [GO:0006888]; intra-Golgi vesicle-mediated transport [GO:0006891]; intracellular protein transport [GO:0006886]; retrograde vesicle-mediated transport, Golgi to ER [GO:0006890]	coated vesicle [GO:0030135]; COPI vesicle coat [GO:0030126]; Golgi membrane [GO:0000139]; structural molecule activity [GO:0005198]; ER to Golgi vesicle-mediated transport [GO:0006888]; intra-Golgi vesicle-mediated transport [GO:0006891]; intracellular protein transport [GO:0006886]; retrograde vesicle-mediated transport, Golgi to ER [GO:0006890]	coated vesicle [GO:0030135]; COPI vesicle coat [GO:0030126]; Golgi membrane [GO:0000139]; structural molecule activity [GO:0005198]; ER to Golgi vesicle-mediated transport [GO:0006888]; intra-Golgi vesicle-mediated transport [GO:0006891]; intracellular protein transport [GO:0006886]; retrograde vesicle-mediated transport, Golgi to ER [GO:0006890]	coated vesicle [GO:0030135]; COPI vesicle coat [GO:0030126]; Golgi membrane [GO:0000139]; structural molecule activity [GO:0005198]; ER to Golgi vesicle-mediated transport [GO:0006888]; intra-Golgi vesicle-mediated transport [GO:0006891]; intracellular protein transport [GO:0006886]; retrograde vesicle-mediated transport, Golgi to ER [GO:0006890]
HSP79_YEAST	2.63282	-1.18878	P32590	Heat shock protein homolog SSE2	SSE2 HSP YBR169C YBR1221	adenyl-nucleotide exchange factor activity [GO:0000774]; ATP binding [GO:0005524]; calmodulin binding [GO:0005516]; protein folding [GO:0006457]; protein refolding [GO:0042026]	adenyl-nucleotide exchange factor activity [GO:0000774]; ATP binding [GO:0005524]; calmodulin binding [GO:0005516]; protein folding [GO:0006457]; protein refolding [GO:0042026]	adenyl-nucleotide exchange factor activity [GO:0000774]; ATP binding [GO:0005524]; calmodulin binding [GO:0005516]; protein folding [GO:0006457]; protein refolding [GO:0042026]	adenyl-nucleotide exchange factor activity [GO:0000774]; ATP binding [GO:0005524]; calmodulin binding [GO:0005516]; protein folding [GO:0006457]; protein refolding [GO:0042026]
MAN1_YEAST	2.46369	-1.21651	P22855	Alpha-mannosidase (EC 3.2.1.24) (Alpha-D-mannoside mannohydrolase)	AMS1 YGL156W G1861	fungal-type vacuole membrane [GO:0000329]; alpha-mannosidase activity [GO:0004559]; carbohydrate binding [GO:0030246]; zinc ion binding [GO:0008270]; cellular carbohydrate metabolic process [GO:0044262]; mannose metabolic process [GO:0006013]; oligosaccharide catabolic process [GO:0009313]; protein deglycosylation [GO:0006517]	fungal-type vacuole membrane [GO:0000329]; alpha-mannosidase activity [GO:0004559]; carbohydrate binding [GO:0030246]; zinc ion binding [GO:0008270]; cellular carbohydrate metabolic process [GO:0044262]; mannose metabolic process [GO:0006013]; oligosaccharide catabolic process [GO:0009313]; protein deglycosylation [GO:0006517]	fungal-type vacuole membrane [GO:0000329]; alpha-mannosidase activity [GO:0004559]; carbohydrate binding [GO:0030246]; zinc ion binding [GO:0008270]; cellular carbohydrate metabolic process [GO:0044262]; mannose metabolic process [GO:0006013]; oligosaccharide catabolic process [GO:0009313]; protein deglycosylation [GO:0006517]	fungal-type vacuole membrane [GO:0000329]; alpha-mannosidase activity [GO:0004559]; carbohydrate binding [GO:0030246]; zinc ion binding [GO:0008270]; cellular carbohydrate metabolic process [GO:0044262]; mannose metabolic process [GO:0006013]; oligosaccharide catabolic process [GO:0009313]; protein deglycosylation [GO:0006517]
GLYM_YEAST	4.73616	-1.21772	P37292	Serine hydroxymethyltransferase, mitochondrial (SHMT) (EC 2.1.2.1) (Glycine hydroxymethyltransferase) (Serine methylase)	SHM1 SHMT1 YBR263W YBR1732	mitochondrion [GO:0005739]; glycine hydroxymethyltransferase activity [GO:0004372]; pyridoxal phosphate binding [GO:0030170]; glycine metabolic process [GO:0006544]; L-serine metabolic process [GO:0006563]; one-carbon metabolic process [GO:0006730]; serine family amino acid biosynthetic process [GO:0009070]; tetrahydrofolate interconversion [GO:0035999]	mitochondrion [GO:0005739]; glycine hydroxymethyltransferase activity [GO:0004372]; pyridoxal phosphate binding [GO:0030170]; glycine metabolic process [GO:0006544]; L-serine metabolic process [GO:0006563]; one-carbon metabolic process [GO:0006730]; serine family amino acid biosynthetic process [GO:0009070]; tetrahydrofolate interconversion [GO:0035999]	mitochondrion [GO:0005739]; glycine hydroxymethyltransferase activity [GO:0004372]; pyridoxal phosphate binding [GO:0030170]; glycine metabolic process [GO:0006544]; L-serine metabolic process [GO:0006563]; one-carbon metabolic process [GO:0006730]; serine family amino acid biosynthetic process [GO:0009070]; tetrahydrofolate interconversion [GO:0035999]	mitochondrion [GO:0005739]; glycine hydroxymethyltransferase activity [GO:0004372]; pyridoxal phosphate binding [GO:0030170]; glycine metabolic process [GO:0006544]; L-serine metabolic process [GO:0006563]; one-carbon metabolic process [GO:0006730]; serine family amino acid biosynthetic process [GO:0009070]; tetrahydrofolate interconversion [GO:0035999]
ARO1_YEAST	2.50416	-1.24049	P08566	Pentafunctional AROM polypeptide [Includes: 3-dehydroquinate synthase (DHQS) (EC 4.2.3.4); 3-phosphoshikimate 1-carboxyvinyltransferase (EC 2.5.1.19) (5-enolpyruvylshikimate-3-phosphate synthase) (EPSP synthase) (EPSPS); Shikimate kinase (SK) (EC 2.7.1.71); 3-dehydroquinate dehydratase (3-dehydroquinase) (EC 4.2.1.10); Shikimate dehydrogenase (EC 1.1.1.25)]	ARO1 AROM YDR127W YD9302.02	cytoplasm [GO:0005737]; 3-dehydroquinate dehydratase activity [GO:0003855]; 3-dehydroquinate synthase activity [GO:0003856]; 3-phosphoshikimate 1-carboxyvinyltransferase activity [GO:0003866]; ATP binding [GO:0005524]; metal ion binding [GO:0046872]; shikimate 3-dehydrogenase (NADP+) activity [GO:0004764]; shikimate kinase activity [GO:0004765]; aromatic amino acid family biosynthetic process [GO…	cytoplasm [GO:0005737]; 3-dehydroquinate dehydratase activity [GO:0003855]; 3-dehydroquinate synthase activity [GO:0003856]; 3-phosphoshikimate 1-carboxyvinyltransferase activity [GO:0003866]; ATP binding [GO:0005524]; metal ion binding [GO:0046872]; shikimate 3-dehydrogenase (NADP+) activity [GO:0004764]; shikimate kinase activity [GO:0004765]; aromatic amino acid family biosynthetic process [GO…	cytoplasm [GO:0005737]; 3-dehydroquinate dehydratase activity [GO:0003855]; 3-dehydroquinate synthase activity [GO:0003856]; 3-phosphoshikimate 1-carboxyvinyltransferase activity [GO:0003866]; ATP binding [GO:0005524]; metal ion binding [GO:0046872]; shikimate 3-dehydrogenase (NADP+) activity [GO:0004764]; shikimate kinase activity [GO:0004765]; aromatic amino acid family biosynthetic process [GO…	cytoplasm [GO:0005737]; 3-dehydroquinate dehydratase activity [GO:0003855]; 3-dehydroquinate synthase activity [GO:0003856]; 3-phosphoshikimate 1-carboxyvinyltransferase activity [GO:0003866]; ATP binding [GO:0005524]; metal ion binding [GO:0046872]; shikimate 3-dehydrogenase (NADP+) activity [GO:0004764]; shikimate kinase activity [GO:0004765]; aromatic amino acid family biosynthetic process [GO…
CY1_YEAST	2.0514	-1.24839	P07143	Cytochrome c1, heme protein, mitochondrial (Complex III subunit 4) (Complex III subunit IV) (Cytochrome b-c1 complex subunit 4) (Ubiquinol-cytochrome-c reductase complex cytochrome c1 subunit) (Cytochrome c-1)	CYT1 CTC1 YOR065W YOR29-16	cytosol [GO:0005829]; mitochondrial inner membrane [GO:0005743]; mitochondrial intermembrane space [GO:0005758]; mitochondrial respiratory chain [GO:0005746]; mitochondrial respiratory chain complex III [GO:0005750]; electron transporter, transferring electrons from CoQH2-cytochrome c reductase complex and cytochrome c oxidase complex activity [GO:0045155]; electron transporter, transferring elec…	cytosol [GO:0005829]; mitochondrial inner membrane [GO:0005743]; mitochondrial intermembrane space [GO:0005758]; mitochondrial respiratory chain [GO:0005746]; mitochondrial respiratory chain complex III [GO:0005750]; electron transporter, transferring electrons from CoQH2-cytochrome c reductase complex and cytochrome c oxidase complex activity [GO:0045155]; electron transporter, transferring elec…	cytosol [GO:0005829]; mitochondrial inner membrane [GO:0005743]; mitochondrial intermembrane space [GO:0005758]; mitochondrial respiratory chain [GO:0005746]; mitochondrial respiratory chain complex III [GO:0005750]; electron transporter, transferring electrons from CoQH2-cytochrome c reductase complex and cytochrome c oxidase complex activity [GO:0045155]; electron transporter, transferring elec…	cytosol [GO:0005829]; mitochondrial inner membrane [GO:0005743]; mitochondrial intermembrane space [GO:0005758]; mitochondrial respiratory chain [GO:0005746]; mitochondrial respiratory chain complex III [GO:0005750]; electron transporter, transferring electrons from CoQH2-cytochrome c reductase complex and cytochrome c oxidase complex activity [GO:0045155]; electron transporter, transferring elec…
HSP75_YEAST	2.89926	-1.29269	P11484	Ribosome-associated molecular chaperone SSB1 (EC 3.6.4.10) (Cold-inducible protein YG101) (Heat shock protein SSB1) (Hsp70 chaperone Ssb)	SSB1 YG101 YDL229W	cytoplasm [GO:0005737]; polysome [GO:0005844]; ATP binding [GO:0005524]; ATPase activity [GO:0016887]; calmodulin binding [GO:0005516]; unfolded protein binding [GO:0051082]; 'de novo' cotranslational protein folding [GO:0051083]; cellular response to glucose starvation [GO:0042149]; cytoplasmic translation [GO:0002181]; regulation of translational fidelity [GO:0006450]; ribosomal subunit export …	cytoplasm [GO:0005737]; polysome [GO:0005844]; ATP binding [GO:0005524]; ATPase activity [GO:0016887]; calmodulin binding [GO:0005516]; unfolded protein binding [GO:0051082]; 'de novo' cotranslational protein folding [GO:0051083]; cellular response to glucose starvation [GO:0042149]; cytoplasmic translation [GO:0002181]; regulation of translational fidelity [GO:0006450]; ribosomal subunit export …	cytoplasm [GO:0005737]; polysome [GO:0005844]; ATP binding [GO:0005524]; ATPase activity [GO:0016887]; calmodulin binding [GO:0005516]; unfolded protein binding [GO:0051082]; 'de novo' cotranslational protein folding [GO:0051083]; cellular response to glucose starvation [GO:0042149]; cytoplasmic translation [GO:0002181]; regulation of translational fidelity [GO:0006450]; ribosomal subunit export …	cytoplasm [GO:0005737]; polysome [GO:0005844]; ATP binding [GO:0005524]; ATPase activity [GO:0016887]; calmodulin binding [GO:0005516]; unfolded protein binding [GO:0051082]; 'de novo' cotranslational protein folding [GO:0051083]; cellular response to glucose starvation [GO:0042149]; cytoplasmic translation [GO:0002181]; regulation of translational fidelity [GO:0006450]; ribosomal subunit export …
VTC4_YEAST	1.70969	-1.30418	P47075	Vacuolar transporter chaperone 4 (Phosphate metabolism protein 3)	VTC4 PHM3 YJL012C J1345	endoplasmic reticulum [GO:0005783]; integral component of membrane [GO:0016021]; intrinsic component of vacuolar membrane [GO:0031310]; vacuolar transporter chaperone complex [GO:0033254]; inositol hexakisphosphate binding [GO:0000822]; polyphosphate kinase activity [GO:0008976]; inositol phosphate-mediated signaling [GO:0048016]; lysosomal microautophagy [GO:0016237]; polyphosphate biosynthetic …	endoplasmic reticulum [GO:0005783]; integral component of membrane [GO:0016021]; intrinsic component of vacuolar membrane [GO:0031310]; vacuolar transporter chaperone complex [GO:0033254]; inositol hexakisphosphate binding [GO:0000822]; polyphosphate kinase activity [GO:0008976]; inositol phosphate-mediated signaling [GO:0048016]; lysosomal microautophagy [GO:0016237]; polyphosphate biosynthetic …	endoplasmic reticulum [GO:0005783]; integral component of membrane [GO:0016021]; intrinsic component of vacuolar membrane [GO:0031310]; vacuolar transporter chaperone complex [GO:0033254]; inositol hexakisphosphate binding [GO:0000822]; polyphosphate kinase activity [GO:0008976]; inositol phosphate-mediated signaling [GO:0048016]; lysosomal microautophagy [GO:0016237]; polyphosphate biosynthetic …	endoplasmic reticulum [GO:0005783]; integral component of membrane [GO:0016021]; intrinsic component of vacuolar membrane [GO:0031310]; vacuolar transporter chaperone complex [GO:0033254]; inositol hexakisphosphate binding [GO:0000822]; polyphosphate kinase activity [GO:0008976]; inositol phosphate-mediated signaling [GO:0048016]; lysosomal microautophagy [GO:0016237]; polyphosphate biosynthetic …
IF4B_YEAST	3.63947	-1.32208	P34167	Eukaryotic translation initiation factor 4B (eIF-4B)	TIF3 STM1 TIF42 YPR163C P9325.6	cytoplasmic stress granule [GO:0010494]; eukaryotic translation initiation factor 4F complex [GO:0016281]; polysome [GO:0005844]; ribosomal small subunit binding [GO:0043024]; RNA binding [GO:0003723]; RNA strand annealing activity [GO:0033592]; RNA strand-exchange activity [GO:0034057]; single-stranded RNA binding [GO:0003727]; translation initiation factor activity [GO:0003743]; cytoplasmic tra…	cytoplasmic stress granule [GO:0010494]; eukaryotic translation initiation factor 4F complex [GO:0016281]; polysome [GO:0005844]; ribosomal small subunit binding [GO:0043024]; RNA binding [GO:0003723]; RNA strand annealing activity [GO:0033592]; RNA strand-exchange activity [GO:0034057]; single-stranded RNA binding [GO:0003727]; translation initiation factor activity [GO:0003743]; cytoplasmic tra…	cytoplasmic stress granule [GO:0010494]; eukaryotic translation initiation factor 4F complex [GO:0016281]; polysome [GO:0005844]; ribosomal small subunit binding [GO:0043024]; RNA binding [GO:0003723]; RNA strand annealing activity [GO:0033592]; RNA strand-exchange activity [GO:0034057]; single-stranded RNA binding [GO:0003727]; translation initiation factor activity [GO:0003743]; cytoplasmic tra…	cytoplasmic stress granule [GO:0010494]; eukaryotic translation initiation factor 4F complex [GO:0016281]; polysome [GO:0005844]; ribosomal small subunit binding [GO:0043024]; RNA binding [GO:0003723]; RNA strand annealing activity [GO:0033592]; RNA strand-exchange activity [GO:0034057]; single-stranded RNA binding [GO:0003727]; translation initiation factor activity [GO:0003743]; cytoplasmic tra…
KPYK2_YEAST	3.79821	-1.92756	P52489	Pyruvate kinase 2 (PK 2) (EC 2.7.1.40)	PYK2 YOR347C O6342	mitochondrion [GO:0005739]; ATP binding [GO:0005524]; kinase activity [GO:0016301]; magnesium ion binding [GO:0000287]; potassium ion binding [GO:0030955]; pyruvate kinase activity [GO:0004743]; pyruvate metabolic process [GO:0006090]	mitochondrion [GO:0005739]; ATP binding [GO:0005524]; kinase activity [GO:0016301]; magnesium ion binding [GO:0000287]; potassium ion binding [GO:0030955]; pyruvate kinase activity [GO:0004743]; pyruvate metabolic process [GO:0006090]	mitochondrion [GO:0005739]; ATP binding [GO:0005524]; kinase activity [GO:0016301]; magnesium ion binding [GO:0000287]; potassium ion binding [GO:0030955]; pyruvate kinase activity [GO:0004743]; pyruvate metabolic process [GO:0006090]	mitochondrion [GO:0005739]; ATP binding [GO:0005524]; kinase activity [GO:0016301]; magnesium ion binding [GO:0000287]; potassium ion binding [GO:0030955]; pyruvate kinase activity [GO:0004743]; pyruvate metabolic process [GO:0006090]
YRO2_YEAST	3.45759	-2.25556	P38079	Protein YRO2	YRO2 YBR054W YBR0507	integral component of membrane [GO:0016021]; plasma membrane [GO:0005886]; ion channel activity [GO:0005216]; negative regulation of ATPase activity [GO:0032780]	integral component of membrane [GO:0016021]; plasma membrane [GO:0005886]; ion channel activity [GO:0005216]; negative regulation of ATPase activity [GO:0032780]	integral component of membrane [GO:0016021]; plasma membrane [GO:0005886]; ion channel activity [GO:0005216]; negative regulation of ATPase activity [GO:0032780]	integral component of membrane [GO:0016021]; plasma membrane [GO:0005886]; ion channel activity [GO:0005216]; negative regulation of ATPase activity [GO:0032780]
