# Supplementary material for: Temporal profiling of redox-dependent heterogeneity in single cells
Source: eLife journal article supplement (doi:10.7554/elife.37623), 2018-06-05
Supplement: supp [file elife-37623-supp-v1.zip › elife_poa_e37623_Supplementary_File_4.xlsx]

## Sheet: Sheet1
protein ID	LOG(P-LOG(P-value)	Difference	uniprot ID	Protein names	Gene names	Length	Gene ontology (GO)	Gene ontology (cellular component)	Gene ontology (biological process)	Gene ontology (molecular function)
KPYK2_YEAST	3.40088	-2.30215	P52489	Pyruvate kinase 2 (PK 2) (EC 2.7.1.40)	PYK2 YOR347C O6342	506	mitochondrion [GO:0005739]; ATP binding [GO:0005524]; kinase activity [GO:0016301]; magnesium ion binding [GO:0000287]; potassium ion binding [GO:0030955]; pyruvate kinase activity [GO:0004743]; pyruvate metabolic process [GO:0006090]	mitochondrion [GO:0005739]	pyruvate metabolic process [GO:0006090]	ATP binding [GO:0005524]; kinase activity [GO:0016301]; magnesium ion binding [GO:0000287]; potassium ion binding [GO:0030955]; pyruvate kinase activity [GO:0004743]
HBT1_YEAST	2.19972	-1.40364	Q07653	Protein HBT1 (HUB1 target protein 1)	HBT1 Crem YDL223C	1046	cytoplasm [GO:0005737]; mating projection [GO:0005937]; cell morphogenesis involved in conjugation with cellular fusion [GO:0000753]; regulation of cell shape [GO:0008360]	cytoplasm [GO:0005737]; mating projection [GO:0005937]	cell morphogenesis involved in conjugation with cellular fusion [GO:0000753]; regulation of cell shape [GO:0008360]
HSP73_YEAST	2.90162	-1.38374	P09435	Heat shock protein SSA3	SSA3 YBL075C YBL06.07 YBL0610	649	cytosol [GO:0005829]; ATP binding [GO:0005524]; ATPase activity [GO:0016887]; unfolded protein binding [GO:0051082]; misfolded or incompletely synthesized protein catabolic process [GO:0006515]; protein folding [GO:0006457]; SRP-dependent cotranslational protein targeting to membrane, translocation [GO:0006616]	cytosol [GO:0005829]	misfolded or incompletely synthesized protein catabolic process [GO:0006515]; protein folding [GO:0006457]; SRP-dependent cotranslational protein targeting to membrane, translocation [GO:0006616]	ATPase activity [GO:0016887]; ATP binding [GO:0005524]; unfolded protein binding [GO:0051082]
ATPO_YEAST	2.89927	-1.32672	P09457	ATP synthase subunit 5, mitochondrial (ATP synthase chain 5) (Oligomycin sensitivity conferral protein) (OSCP)	ATP5 OSCP YDR298C D9740.11	212	mitochondrial proton-transporting ATP synthase, stator stalk [GO:0000274]; proton-transporting ATP synthase activity, rotational mechanism [GO:0046933]; ATP synthesis coupled proton transport [GO:0015986]	mitochondrial proton-transporting ATP synthase, stator stalk [GO:0000274]	ATP synthesis coupled proton transport [GO:0015986]	proton-transporting ATP synthase activity, rotational mechanism [GO:0046933]
HSP75_YEAST	4.26893	-1.304	P11484	Ribosome-associated molecular chaperone SSB1 (EC 3.6.4.10) (Cold-inducible protein YG101) (Heat shock protein SSB1) (Hsp70 chaperone Ssb)	SSB1 YG101 YDL229W	613	cytoplasm [GO:0005737]; polysome [GO:0005844]; ATP binding [GO:0005524]; ATPase activity [GO:0016887]; calmodulin binding [GO:0005516]; unfolded protein binding [GO:0051082]; 'de novo' cotranslational protein folding [GO:0051083]; cellular response to glucose starvation [GO:0042149]; cytoplasmic translation [GO:0002181]; regulation of translational fidelity [GO:0006450]; ribosomal subunit export …	cytoplasm [GO:0005737]; polysome [GO:0005844]	'de novo' cotranslational protein folding [GO:0051083]; cellular response to glucose starvation [GO:0042149]; cytoplasmic translation [GO:0002181]; regulation of translational fidelity [GO:0006450]; ribosomal subunit export from nucleus [GO:0000054]; rRNA processing [GO:0006364]; translational frameshifting [GO:0006452]; translational termination [GO:0006415]	ATPase activity [GO:0016887]; ATP binding [GO:0005524]; calmodulin binding [GO:0005516]; unfolded protein binding [GO:0051082]
CY1_YEAST	3.05874	-1.26447	P07143	Cytochrome c1, heme protein, mitochondrial (Complex III subunit 4) (Complex III subunit IV) (Cytochrome b-c1 complex subunit 4) (Ubiquinol-cytochrome-c reductase complex cytochrome c1 subunit) (Cytochrome c-1)	CYT1 CTC1 YOR065W YOR29-16	309	cytosol [GO:0005829]; mitochondrial inner membrane [GO:0005743]; mitochondrial intermembrane space [GO:0005758]; mitochondrial respiratory chain [GO:0005746]; mitochondrial respiratory chain complex III [GO:0005750]; electron transporter, transferring electrons from CoQH2-cytochrome c reductase complex and cytochrome c oxidase complex activity [GO:0045155]; electron transporter, transferring elec…	cytosol [GO:0005829]; mitochondrial inner membrane [GO:0005743]; mitochondrial intermembrane space [GO:0005758]; mitochondrial respiratory chain [GO:0005746]; mitochondrial respiratory chain complex III [GO:0005750]	mitochondrial ATP synthesis coupled proton transport [GO:0042776]; mitochondrial electron transport, ubiquinol to cytochrome c [GO:0006122]; oxidative phosphorylation [GO:0006119]; protein targeting to mitochondrion [GO:0006626]	electron transporter, transferring electrons from CoQH2-cytochrome c reductase complex and cytochrome c oxidase complex activity [GO:0045155]; electron transporter, transferring electrons within CoQH2-cytochrome c reductase complex activity [GO:0045153]; heme binding [GO:0020037]; metal ion binding [GO:0046872]
RL35B_YEAST	1.81039	-1.18567	P0CX85	60S ribosomal protein L35-B (Large ribosomal subunit protein uL29-B)	RPL35B SOS2 YDL136W D2170	120	cytosolic large ribosomal subunit [GO:0022625]; preribosome, large subunit precursor [GO:0030687]; mRNA binding [GO:0003729]; structural constituent of ribosome [GO:0003735]; cytoplasmic translation [GO:0002181]; maturation of LSU-rRNA from tricistronic rRNA transcript (SSU-rRNA, 5.8S rRNA, LSU-rRNA) [GO:0000463]; translation [GO:0006412]	cytosolic large ribosomal subunit [GO:0022625]; preribosome, large subunit precursor [GO:0030687]	cytoplasmic translation [GO:0002181]; maturation of LSU-rRNA from tricistronic rRNA transcript (SSU-rRNA, 5.8S rRNA, LSU-rRNA) [GO:0000463]; translation [GO:0006412]	mRNA binding [GO:0003729]; structural constituent of ribosome [GO:0003735]
MASY_YEAST	2.76853	-1.14162	P30952	Malate synthase 1, glyoxysomal (EC 2.3.3.9)	MLS1 YNL117W N1921	554	cytosol [GO:0005829]; glyoxysome [GO:0009514]; peroxisomal matrix [GO:0005782]; peroxisome [GO:0005777]; malate synthase activity [GO:0004474]; glyoxylate cycle [GO:0006097]; tricarboxylic acid cycle [GO:0006099]	cytosol [GO:0005829]; glyoxysome [GO:0009514]; peroxisomal matrix [GO:0005782]; peroxisome [GO:0005777]	glyoxylate cycle [GO:0006097]; tricarboxylic acid cycle [GO:0006099]	malate synthase activity [GO:0004474]
QCR7_YEAST	1.37552	-1.13638	P00128	Cytochrome b-c1 complex subunit 7 (Complex III subunit 7) (Complex III subunit VII) (Ubiquinol-cytochrome c reductase c reductase complex 14 kDa protein)	QCR7 CRO1 UCR7 YDR529C D9719.32	127	mitochondrial respiratory chain complex III [GO:0005750]; aerobic respiration [GO:0009060]; hydrogen ion transmembrane transport [GO:1902600]; mitochondrial electron transport, ubiquinol to cytochrome c [GO:0006122]; mitochondrial respiratory chain complex III assembly [GO:0034551]	mitochondrial respiratory chain complex III [GO:0005750]	aerobic respiration [GO:0009060]; hydrogen ion transmembrane transport [GO:1902600]; mitochondrial electron transport, ubiquinol to cytochrome c [GO:0006122]; mitochondrial respiratory chain complex III assembly [GO:0034551]
HAS1_YEAST	2.64571	-1.12638	Q03532	ATP-dependent RNA helicase HAS1 (EC 3.6.4.13) (Helicase associated with SET1 protein 1)	HAS1 YMR290C	505	cytoplasm [GO:0005737]; nuclear envelope [GO:0005635]; nucleolus [GO:0005730]; preribosome, large subunit precursor [GO:0030687]; ATP binding [GO:0005524]; ATP-dependent RNA helicase activity [GO:0004004]; identical protein binding [GO:0042802]; RNA binding [GO:0003723]; RNA-dependent ATPase activity [GO:0008186]; maturation of LSU-rRNA from tricistronic rRNA transcript (SSU-rRNA, 5.8S rRNA, LSU-…	cytoplasm [GO:0005737]; nuclear envelope [GO:0005635]; nucleolus [GO:0005730]; preribosome, large subunit precursor [GO:0030687]	maturation of LSU-rRNA from tricistronic rRNA transcript (SSU-rRNA, 5.8S rRNA, LSU-rRNA) [GO:0000463]; maturation of SSU-rRNA from tricistronic rRNA transcript (SSU-rRNA, 5.8S rRNA, LSU-rRNA) [GO:0000462]; ribosomal large subunit biogenesis [GO:0042273]; ribosomal small subunit biogenesis [GO:0042274]; RNA secondary structure unwinding [GO:0010501]; rRNA processing [GO:0006364]; snoRNA release fr…	ATP binding [GO:0005524]; ATP-dependent RNA helicase activity [GO:0004004]; identical protein binding [GO:0042802]; RNA binding [GO:0003723]; RNA-dependent ATPase activity [GO:0008186]
G6PD_YEAST	2.32204	-1.10892	P11412	Glucose-6-phosphate 1-dehydrogenase (G6PD) (EC 1.1.1.49)	ZWF1 MET19 YNL241C N1110	505	glucose-6-phosphate dehydrogenase activity [GO:0004345]; NADP binding [GO:0050661]; glucose metabolic process [GO:0006006]; NADPH regeneration [GO:0006740]; pentose-phosphate shunt, oxidative branch [GO:0009051]; response to hydrogen peroxide [GO:0042542]		glucose metabolic process [GO:0006006]; NADPH regeneration [GO:0006740]; pentose-phosphate shunt, oxidative branch [GO:0009051]; response to hydrogen peroxide [GO:0042542]	glucose-6-phosphate dehydrogenase activity [GO:0004345]; NADP binding [GO:0050661]
UGA2_YEAST	1.72735	-1.07336	P38067	Succinate-semialdehyde dehydrogenase [NADP(+)] (SSDH) (EC 1.2.1.16)	UGA2 UGA5 YBR006W YBR0112	497	mitochondrial matrix [GO:0005759]; mitochondrion [GO:0005739]; copper ion binding [GO:0005507]; NAD binding [GO:0051287]; succinate-semialdehyde dehydrogenase (NAD+) activity [GO:0004777]; succinate-semialdehyde dehydrogenase [NAD(P)+] activity [GO:0009013]; cellular response to oxidative stress [GO:0034599]; gamma-aminobutyric acid catabolic process [GO:0009450]; glutamate decarboxylation to suc…	mitochondrial matrix [GO:0005759]; mitochondrion [GO:0005739]	cellular response to oxidative stress [GO:0034599]; gamma-aminobutyric acid catabolic process [GO:0009450]; glutamate decarboxylation to succinate [GO:0006540]; reactive oxygen species metabolic process [GO:0072593]; response to heat [GO:0009408]; response to light stimulus [GO:0009416]	copper ion binding [GO:0005507]; NAD binding [GO:0051287]; succinate-semialdehyde dehydrogenase (NAD+) activity [GO:0004777]; succinate-semialdehyde dehydrogenase [NAD(P)+] activity [GO:0009013]
ACS1_YEAST	2.26087	-1.07119	Q01574	Acetyl-coenzyme A synthetase 1 (EC 6.2.1.1) (Acetate--CoA ligase 1) (Acyl-activating enzyme 1)	ACS1 YAL054C FUN44	713	cytosol [GO:0005829]; endoplasmic reticulum [GO:0005783]; mitochondrion [GO:0005739]; nucleus [GO:0005634]; acetate-CoA ligase activity [GO:0003987]; acid-ammonia (or amide) ligase activity [GO:0016880]; AMP binding [GO:0016208]; ATP binding [GO:0005524]; acetate fermentation [GO:0019654]; acetyl-CoA biosynthetic process [GO:0006085]; acetyl-CoA biosynthetic process from acetate [GO:0019427]; his…	cytosol [GO:0005829]; endoplasmic reticulum [GO:0005783]; mitochondrion [GO:0005739]; nucleus [GO:0005634]	acetate fermentation [GO:0019654]; acetyl-CoA biosynthetic process [GO:0006085]; acetyl-CoA biosynthetic process from acetate [GO:0019427]; histone acetylation [GO:0016573]	acetate-CoA ligase activity [GO:0003987]; acid-ammonia (or amide) ligase activity [GO:0016880]; AMP binding [GO:0016208]; ATP binding [GO:0005524]
DLD1_YEAST	3.04092	-1.04157	P32891	D-lactate dehydrogenase [cytochrome] 1, mitochondrial (EC 1.1.2.4) (D-lactate ferricytochrome C oxidoreductase) (D-LCR)	DLD1 DLD YDL174C	587	mitochondrial inner membrane [GO:0005743]; mitochondrial intermembrane space [GO:0005758]; mitochondrion [GO:0005739]; D-lactate dehydrogenase (cytochrome) activity [GO:0004458]; flavin adenine dinucleotide binding [GO:0050660]; lactate catabolic process [GO:1903457]; protein targeting to mitochondrion [GO:0006626]	mitochondrial inner membrane [GO:0005743]; mitochondrial intermembrane space [GO:0005758]; mitochondrion [GO:0005739]	lactate catabolic process [GO:1903457]; protein targeting to mitochondrion [GO:0006626]	D-lactate dehydrogenase (cytochrome) activity [GO:0004458]; flavin adenine dinucleotide binding [GO:0050660]
ACH1_YEAST	2.26494	-1.03061	P32316	Acetyl-CoA hydrolase (EC 3.1.2.1) (Acetyl-CoA deacylase) (Acetyl-CoA acylase)	ACH1 YBL015W YBL03.18 YBL0304	526	cytosol [GO:0005829]; mitochondrion [GO:0005739]; acetate CoA-transferase activity [GO:0008775]; acetyl-CoA hydrolase activity [GO:0003986]; acetate metabolic process [GO:0006083]; acetyl-CoA metabolic process [GO:0006084]; propionate metabolic process, methylcitrate cycle [GO:0019679]	cytosol [GO:0005829]; mitochondrion [GO:0005739]	acetate metabolic process [GO:0006083]; acetyl-CoA metabolic process [GO:0006084]; propionate metabolic process, methylcitrate cycle [GO:0019679]	acetate CoA-transferase activity [GO:0008775]; acetyl-CoA hydrolase activity [GO:0003986]
HXT5_YEAST	1.48787	-1.02472	P38695	Probable glucose transporter HXT5	HXT5 YHR096C	592	integral component of membrane [GO:0016021]; plasma membrane [GO:0005886]; fructose transmembrane transporter activity [GO:0005353]; glucose transmembrane transporter activity [GO:0005355]; mannose transmembrane transporter activity [GO:0015578]; sugar:proton symporter activity [GO:0005351]; glucose import [GO:0046323]; glucose transport [GO:0015758]; hexose transport [GO:0008645]	integral component of membrane [GO:0016021]; plasma membrane [GO:0005886]	glucose import [GO:0046323]; glucose transport [GO:0015758]; hexose transport [GO:0008645]	fructose transmembrane transporter activity [GO:0005353]; glucose transmembrane transporter activity [GO:0005355]; mannose transmembrane transporter activity [GO:0015578]; sugar:proton symporter activity [GO:0005351]
G3P2_YEAST	1.19162	-0.984881	P00358	Glyceraldehyde-3-phosphate dehydrogenase 2 (GAPDH 2) (EC 1.2.1.12)	TDH2 GPD2 YJR009C J1433	332	cytosol [GO:0005829]; fungal-type cell wall [GO:0009277]; lipid particle [GO:0005811]; mitochondrion [GO:0005739]; glyceraldehyde-3-phosphate dehydrogenase (NAD+) (phosphorylating) activity [GO:0004365]; NAD binding [GO:0051287]; NADP binding [GO:0050661]; promoter-specific chromatin binding [GO:1990841]; apoptotic process [GO:0006915]; gluconeogenesis [GO:0006094]; glycolytic process [GO:0006096…	cytosol [GO:0005829]; fungal-type cell wall [GO:0009277]; lipid particle [GO:0005811]; mitochondrion [GO:0005739]	apoptotic process [GO:0006915]; gluconeogenesis [GO:0006094]; glycolytic process [GO:0006096]; reactive oxygen species metabolic process [GO:0072593]	glyceraldehyde-3-phosphate dehydrogenase (NAD+) (phosphorylating) activity [GO:0004365]; NAD binding [GO:0051287]; NADP binding [GO:0050661]; promoter-specific chromatin binding [GO:1990841]
NOP56_YEAST	1.6517	-0.98158	Q12460	Nucleolar protein 56 (Ribosome biosynthesis protein SIK1) (Suppressor of I kappa b protein 1)	NOP56 SIK1 YLR197W L8167.9	504	box C/D snoRNP complex [GO:0031428]; nucleolus [GO:0005730]; nucleoplasm [GO:0005654]; small-subunit processome [GO:0032040]; snoRNA binding [GO:0030515]; rRNA 2'-O-methylation [GO:0000451]; rRNA methylation [GO:0031167]; rRNA modification [GO:0000154]; rRNA processing [GO:0006364]	box C/D snoRNP complex [GO:0031428]; nucleolus [GO:0005730]; nucleoplasm [GO:0005654]; small-subunit processome [GO:0032040]	rRNA 2'-O-methylation [GO:0000451]; rRNA methylation [GO:0031167]; rRNA modification [GO:0000154]; rRNA processing [GO:0006364]	snoRNA binding [GO:0030515]
F16P_YEAST	2.39995	-0.976495	P09201	Fructose-1,6-bisphosphatase (FBPase) (EC 3.1.3.11) (D-fructose-1,6-bisphosphate 1-phosphohydrolase)	FBP1 YLR377C L8039.18	348	cytosol [GO:0005829]; periplasmic space [GO:0042597]; fructose 1,6-bisphosphate 1-phosphatase activity [GO:0042132]; metal ion binding [GO:0046872]; fructose 1,6-bisphosphate metabolic process [GO:0030388]; fructose 6-phosphate metabolic process [GO:0006002]; fructose metabolic process [GO:0006000]; gluconeogenesis [GO:0006094]; reactive oxygen species metabolic process [GO:0072593]; sucrose bios…	cytosol [GO:0005829]; periplasmic space [GO:0042597]	fructose 1,6-bisphosphate metabolic process [GO:0030388]; fructose 6-phosphate metabolic process [GO:0006002]; fructose metabolic process [GO:0006000]; gluconeogenesis [GO:0006094]; reactive oxygen species metabolic process [GO:0072593]; sucrose biosynthetic process [GO:0005986]	fructose 1,6-bisphosphate 1-phosphatase activity [GO:0042132]; metal ion binding [GO:0046872]
GDE_YEAST	3.14299	-0.923457	Q06625	Glycogen debranching enzyme (Glycogen debrancher) [Includes: 4-alpha-glucanotransferase (EC 2.4.1.25) (Oligo-1,4-1,4-glucantransferase); Amylo-alpha-1,6-glucosidase (Amylo-1,6-glucosidase) (EC 3.2.1.33) (Dextrin 6-alpha-D-glucosidase)]	GDB1 YPR184W	1536	mitochondrion [GO:0005739]; 4-alpha-glucanotransferase activity [GO:0004134]; amylo-alpha-1,6-glucosidase activity [GO:0004135]; glycogen biosynthetic process [GO:0005978]; glycogen catabolic process [GO:0005980]	mitochondrion [GO:0005739]	glycogen biosynthetic process [GO:0005978]; glycogen catabolic process [GO:0005980]	4-alpha-glucanotransferase activity [GO:0004134]; amylo-alpha-1,6-glucosidase activity [GO:0004135]
PRS6B_YEAST	2.04436	-0.921875	P33298	26S proteasome regulatory subunit 6B homolog (Protein YNT1) (Tat-binding homolog 2)	RPT3 YNT1 YTA2 YDR394W D9509.14	428	cell wall [GO:0005618]; cytosolic proteasome complex [GO:0031597]; membrane [GO:0016020]; nuclear proteasome complex [GO:0031595]; proteasome regulatory particle, base subcomplex [GO:0008540]; ATP binding [GO:0005524]; ATPase activity [GO:0016887]; identical protein binding [GO:0042802]; proteasome-activating ATPase activity [GO:0036402]; TBP-class protein binding [GO:0017025]; positive regulatio…	cell wall [GO:0005618]; cytosolic proteasome complex [GO:0031597]; membrane [GO:0016020]; nuclear proteasome complex [GO:0031595]; proteasome regulatory particle, base subcomplex [GO:0008540]	positive regulation of RNA polymerase II transcriptional preinitiation complex assembly [GO:0045899]; proteasome regulatory particle assembly [GO:0070682]; ubiquitin-dependent ERAD pathway [GO:0030433]; ubiquitin-dependent protein catabolic process [GO:0006511]	ATPase activity [GO:0016887]; ATP binding [GO:0005524]; identical protein binding [GO:0042802]; proteasome-activating ATPase activity [GO:0036402]; TBP-class protein binding [GO:0017025]
SYMC_YEAST	2.87246	-0.919306	P00958	Methionine--tRNA ligase, cytoplasmic (EC 6.1.1.10) (Methionyl-tRNA synthetase) (MetRS)	MES1 YGR264C	751	cytoplasm [GO:0005737]; cytosol [GO:0005829]; methionyl glutamyl tRNA synthetase complex [GO:0017102]; ATP binding [GO:0005524]; methionine-tRNA ligase activity [GO:0004825]; methionyl-tRNA aminoacylation [GO:0006431]	cytoplasm [GO:0005737]; cytosol [GO:0005829]; methionyl glutamyl tRNA synthetase complex [GO:0017102]	methionyl-tRNA aminoacylation [GO:0006431]	ATP binding [GO:0005524]; methionine-tRNA ligase activity [GO:0004825]
RAS2_YEAST	1.20182	-0.907634	P01120	Ras-like protein 2	RAS2 ASC1 CTN5 GLC5 YNL098C N2198	322	endoplasmic reticulum membrane [GO:0005789]; mitochondrion [GO:0005739]; nucleus [GO:0005634]; plasma membrane [GO:0005886]; GTP binding [GO:0005525]; GTPase activity [GO:0003924]; activation of adenylate cyclase activity [GO:0007190]; ascospore formation [GO:0030437]; CVT pathway [GO:0032258]; macroautophagy [GO:0016236]; positive regulation of adenylate cyclase activity [GO:0045762]; positive r…	endoplasmic reticulum membrane [GO:0005789]; mitochondrion [GO:0005739]; nucleus [GO:0005634]; plasma membrane [GO:0005886]	activation of adenylate cyclase activity [GO:0007190]; ascospore formation [GO:0030437]; CVT pathway [GO:0032258]; macroautophagy [GO:0016236]; positive regulation of adenylate cyclase activity [GO:0045762]; positive regulation of pseudohyphal growth [GO:2000222]; positive regulation of transcription by galactose [GO:0000411]; protein localization to bud neck [GO:0097271]; regulation of protein l…	GTPase activity [GO:0003924]; GTP binding [GO:0005525]
ODO1_YEAST	1.4388	-0.89884	P20967	2-oxoglutarate dehydrogenase, mitochondrial (EC 1.2.4.2) (2-oxoglutarate dehydrogenase complex component E1) (OGDC-E1) (Alpha-ketoglutarate dehydrogenase)	KGD1 OGD1 YIL125W	1014	mitochondrial nucleoid [GO:0042645]; mitochondrial oxoglutarate dehydrogenase complex [GO:0009353]; oxoglutarate dehydrogenase (succinyl-transferring) activity [GO:0004591]; thiamine pyrophosphate binding [GO:0030976]; 2-oxoglutarate metabolic process [GO:0006103]; tricarboxylic acid cycle [GO:0006099]	mitochondrial nucleoid [GO:0042645]; mitochondrial oxoglutarate dehydrogenase complex [GO:0009353]	2-oxoglutarate metabolic process [GO:0006103]; tricarboxylic acid cycle [GO:0006099]	oxoglutarate dehydrogenase (succinyl-transferring) activity [GO:0004591]; thiamine pyrophosphate binding [GO:0030976]
MAN1_YEAST	2.04628	-0.888787	P22855	Alpha-mannosidase (EC 3.2.1.24) (Alpha-D-mannoside mannohydrolase)	AMS1 YGL156W G1861	1083	fungal-type vacuole membrane [GO:0000329]; alpha-mannosidase activity [GO:0004559]; carbohydrate binding [GO:0030246]; metal ion binding [GO:0046872]; cellular carbohydrate metabolic process [GO:0044262]; mannose metabolic process [GO:0006013]; oligosaccharide catabolic process [GO:0009313]; protein deglycosylation [GO:0006517]	fungal-type vacuole membrane [GO:0000329]	cellular carbohydrate metabolic process [GO:0044262]; mannose metabolic process [GO:0006013]; oligosaccharide catabolic process [GO:0009313]; protein deglycosylation [GO:0006517]	alpha-mannosidase activity [GO:0004559]; carbohydrate binding [GO:0030246]; metal ion binding [GO:0046872]
CISY2_YEAST	1.42495	-0.877001	P08679	Citrate synthase, peroxisomal (EC 2.3.3.16)	CIT2 YCR005C YCR043 YCR5C	460	cytoplasm [GO:0005737]; peroxisome [GO:0005777]; citrate (Si)-synthase activity [GO:0004108]; citrate metabolic process [GO:0006101]; glutamate biosynthetic process [GO:0006537]; glyoxylate cycle [GO:0006097]; tricarboxylic acid cycle [GO:0006099]	cytoplasm [GO:0005737]; peroxisome [GO:0005777]	citrate metabolic process [GO:0006101]; glutamate biosynthetic process [GO:0006537]; glyoxylate cycle [GO:0006097]; tricarboxylic acid cycle [GO:0006099]	citrate (Si)-synthase activity [GO:0004108]
YP260_YEAST	2.36147	-0.853916	Q08977	UPF0662 protein YPL260W	YPL260W	551	cytoplasm [GO:0005737]; nucleus [GO:0005634]	cytoplasm [GO:0005737]; nucleus [GO:0005634]
NAP1_YEAST	1.69464	-0.852449	P25293	Nucleosome assembly protein	NAP1 YKR048C	417	cellular bud neck [GO:0005935]; cytoplasm [GO:0005737]; nucleus [GO:0005634]; cyclin binding [GO:0030332]; DNA binding [GO:0003677]; enzyme activator activity [GO:0008047]; histone binding [GO:0042393]; identical protein binding [GO:0042802]; budding cell bud growth [GO:0007117]; nucleosome assembly [GO:0006334]; nucleosome disassembly [GO:0006337]; positive regulation of catalytic activity [GO:0…	cellular bud neck [GO:0005935]; cytoplasm [GO:0005737]; nucleus [GO:0005634]	budding cell bud growth [GO:0007117]; nucleosome assembly [GO:0006334]; nucleosome disassembly [GO:0006337]; positive regulation of catalytic activity [GO:0043085]; positive regulation of histone H3-K9 acetylation [GO:2000617]; positive regulation of microtubule polymerization [GO:0031116]; positive regulation of transcription elongation from RNA polymerase II promoter [GO:0032968]; protein impor…	cyclin binding [GO:0030332]; DNA binding [GO:0003677]; enzyme activator activity [GO:0008047]; histone binding [GO:0042393]; identical protein binding [GO:0042802]
CBPY_YEAST	2.71665	-0.84943	P00729	Carboxypeptidase Y (CPD-Y) (cpY) (EC 3.4.16.5) (Carboxypeptidase YSCY)	PRC1 YMR297W	532	extracellular region [GO:0005576]; fungal-type vacuole [GO:0000324]; serine-type carboxypeptidase activity [GO:0004185]; phytochelatin biosynthetic process [GO:0046938]; protein catabolic process in the vacuole [GO:0007039]; proteolysis involved in cellular protein catabolic process [GO:0051603]	extracellular region [GO:0005576]; fungal-type vacuole [GO:0000324]	phytochelatin biosynthetic process [GO:0046938]; protein catabolic process in the vacuole [GO:0007039]; proteolysis involved in cellular protein catabolic process [GO:0051603]	serine-type carboxypeptidase activity [GO:0004185]
ACON_YEAST	1.42083	-0.847592	P19414	Aconitate hydratase, mitochondrial (Aconitase) (EC 4.2.1.3) (Citrate hydro-lyase)	ACO1 GLU1 YLR304C L8003.22	778	cytosol [GO:0005829]; mitochondrial intermembrane space [GO:0005758]; mitochondrial matrix [GO:0005759]; mitochondrial nucleoid [GO:0042645]; 4 iron, 4 sulfur cluster binding [GO:0051539]; aconitate hydratase activity [GO:0003994]; double-stranded DNA binding [GO:0003690]; metal ion binding [GO:0046872]; single-stranded DNA binding [GO:0003697]; mitochondrial genome maintenance [GO:0000002]; prot…	cytosol [GO:0005829]; mitochondrial intermembrane space [GO:0005758]; mitochondrial matrix [GO:0005759]; mitochondrial nucleoid [GO:0042645]	mitochondrial genome maintenance [GO:0000002]; protein targeting to mitochondrion [GO:0006626]; tricarboxylic acid cycle [GO:0006099]	4 iron, 4 sulfur cluster binding [GO:0051539]; aconitate hydratase activity [GO:0003994]; double-stranded DNA binding [GO:0003690]; metal ion binding [GO:0046872]; single-stranded DNA binding [GO:0003697]
EIF3J_YEAST	1.99669	-0.814461	Q05775	Eukaryotic translation initiation factor 3 subunit J (eIF3j) (Eukaryotic translation initiation factor 3 30 kDa subunit) (eIF-3 30 kDa)	HCR1 YLR192C L8167.11	265	cytoplasmic stress granule [GO:0010494]; eukaryotic translation initiation factor 3 complex [GO:0005852]; translation initiation factor activity [GO:0003743]; cytoplasmic translation [GO:0002181]; maturation of SSU-rRNA from tricistronic rRNA transcript (SSU-rRNA, 5.8S rRNA, LSU-rRNA) [GO:0000462]	cytoplasmic stress granule [GO:0010494]; eukaryotic translation initiation factor 3 complex [GO:0005852]	cytoplasmic translation [GO:0002181]; maturation of SSU-rRNA from tricistronic rRNA transcript (SSU-rRNA, 5.8S rRNA, LSU-rRNA) [GO:0000462]	translation initiation factor activity [GO:0003743]
MCR1_YEAST	1.45251	-0.80382	P36060	NADH-cytochrome b5 reductase 2 (EC 1.6.2.2) (Mitochondrial cytochrome b reductase) (p34/p32) [Cleaved into: NADH-cytochrome b5 reductase p34 form; NADH-cytochrome b5 reductase p32 form]	MCR1 YKL150W YKL605	302	integral component of mitochondrial outer membrane [GO:0031307]; mitochondrial intermembrane space [GO:0005758]; mitochondrial outer membrane [GO:0005741]; cytochrome-b5 reductase activity, acting on NAD(P)H [GO:0004128]; cellular response to oxidative stress [GO:0034599]; ergosterol biosynthetic process [GO:0006696]	integral component of mitochondrial outer membrane [GO:0031307]; mitochondrial intermembrane space [GO:0005758]; mitochondrial outer membrane [GO:0005741]	cellular response to oxidative stress [GO:0034599]; ergosterol biosynthetic process [GO:0006696]	cytochrome-b5 reductase activity, acting on NAD(P)H [GO:0004128]
THDH_YEAST	2.40217	-0.796585	P00927	Threonine dehydratase, mitochondrial (EC 4.3.1.19) (Threonine deaminase)	ILV1 YER086W	576	mitochondrion [GO:0005739]; L-threonine ammonia-lyase activity [GO:0004794]; pyridoxal phosphate binding [GO:0030170]; isoleucine biosynthetic process [GO:0009097]; threonine catabolic process [GO:0006567]	mitochondrion [GO:0005739]	isoleucine biosynthetic process [GO:0009097]; threonine catabolic process [GO:0006567]	L-threonine ammonia-lyase activity [GO:0004794]; pyridoxal phosphate binding [GO:0030170]
ERF3_YEAST	2.0612	-0.791324	P05453	Eukaryotic peptide chain release factor GTP-binding subunit (ERF-3) (ERF3) (ERF2) (G1 to S phase transition protein 1) (Omnipotent suppressor protein 2) (PSI no more protein 2) (Polypeptide release factor 3) (Translation release factor 3)	SUP35 GST1 PNM2 SAL3 SUF12 SUP2 YDR172W YD9395.05	685	cytoplasmic stress granule [GO:0010494]; cytosol [GO:0005829]; translation release factor complex [GO:0018444]; vacuole [GO:0005773]; GTP binding [GO:0005525]; GTPase activity [GO:0003924]; translation release factor activity [GO:0003747]; cytoplasmic translational termination [GO:0002184]; nuclear-transcribed mRNA catabolic process, deadenylation-dependent decay [GO:0000288]; translational termi…	cytoplasmic stress granule [GO:0010494]; cytosol [GO:0005829]; translation release factor complex [GO:0018444]; vacuole [GO:0005773]	cytoplasmic translational termination [GO:0002184]; nuclear-transcribed mRNA catabolic process, deadenylation-dependent decay [GO:0000288]; translational termination [GO:0006415]	GTPase activity [GO:0003924]; GTP binding [GO:0005525]; translation release factor activity [GO:0003747]
ARO1_YEAST	1.32109	-0.766879	P08566	Pentafunctional AROM polypeptide [Includes: 3-dehydroquinate synthase (DHQS) (EC 4.2.3.4); 3-phosphoshikimate 1-carboxyvinyltransferase (EC 2.5.1.19) (5-enolpyruvylshikimate-3-phosphate synthase) (EPSP synthase) (EPSPS); Shikimate kinase (SK) (EC 2.7.1.71); 3-dehydroquinate dehydratase (3-dehydroquinase) (EC 4.2.1.10); Shikimate dehydrogenase (EC 1.1.1.25)]	ARO1 AROM YDR127W YD9302.02	1588	cytoplasm [GO:0005737]; 3-dehydroquinate dehydratase activity [GO:0003855]; 3-dehydroquinate synthase activity [GO:0003856]; 3-phosphoshikimate 1-carboxyvinyltransferase activity [GO:0003866]; ATP binding [GO:0005524]; metal ion binding [GO:0046872]; shikimate 3-dehydrogenase (NADP+) activity [GO:0004764]; shikimate kinase activity [GO:0004765]; aromatic amino acid family biosynthetic process [GO…	cytoplasm [GO:0005737]	aromatic amino acid family biosynthetic process [GO:0009073]; chorismate biosynthetic process [GO:0009423]	3-dehydroquinate dehydratase activity [GO:0003855]; 3-dehydroquinate synthase activity [GO:0003856]; 3-phosphoshikimate 1-carboxyvinyltransferase activity [GO:0003866]; ATP binding [GO:0005524]; metal ion binding [GO:0046872]; shikimate 3-dehydrogenase (NADP+) activity [GO:0004764]; shikimate kinase activity [GO:0004765]
COPA_YEAST	2.82599	-0.766199	P53622	Coatomer subunit alpha (Alpha-coat protein) (Alpha-COP) (Retrieval from endoplasmic reticulum protein 1) (Secretory protein 22) (Suppressor of osmo-sensitivity 1)	COP1 RET1 SEC33 SOO1 YDL145C D1578	1201	COPI vesicle coat [GO:0030126]; Golgi membrane [GO:0000139]; structural molecule activity [GO:0005198]; ubiquitin binding [GO:0043130]; ER to Golgi vesicle-mediated transport [GO:0006888]; intra-Golgi vesicle-mediated transport [GO:0006891]; intracellular protein transport [GO:0006886]; retrograde vesicle-mediated transport, Golgi to ER [GO:0006890]	COPI vesicle coat [GO:0030126]; Golgi membrane [GO:0000139]	ER to Golgi vesicle-mediated transport [GO:0006888]; intracellular protein transport [GO:0006886]; intra-Golgi vesicle-mediated transport [GO:0006891]; retrograde vesicle-mediated transport, Golgi to ER [GO:0006890]	structural molecule activity [GO:0005198]; ubiquitin binding [GO:0043130]
QCR6_YEAST	1.49977	-0.761457	P00127	Cytochrome b-c1 complex subunit 6 (Complex III subunit 6) (Complex III subunit VI) (Cytochrome c1 non-heme 17 kDa protein) (Mitochondrial hinge protein) (Ubiquinol-cytochrome c reductase complex 17 kDa protein)	QCR6 UCR6 YFR033C	147	mitochondrial intermembrane space [GO:0005758]; mitochondrial respiratory chain complex III [GO:0005750]; nuclear periphery [GO:0034399]; ubiquinol-cytochrome-c reductase activity [GO:0008121]; aerobic respiration [GO:0009060]; mitochondrial electron transport, ubiquinol to cytochrome c [GO:0006122]	mitochondrial intermembrane space [GO:0005758]; mitochondrial respiratory chain complex III [GO:0005750]; nuclear periphery [GO:0034399]	aerobic respiration [GO:0009060]; mitochondrial electron transport, ubiquinol to cytochrome c [GO:0006122]	ubiquinol-cytochrome-c reductase activity [GO:0008121]
RPN8_YEAST	1.38863	-0.746656	Q08723	26S proteasome regulatory subunit RPN8	RPN8 YOR261C O5360	338	proteasome regulatory particle, lid subcomplex [GO:0008541]; proteasome storage granule [GO:0034515]; proteasome-mediated ubiquitin-dependent protein catabolic process [GO:0043161]; ubiquitin-dependent protein catabolic process [GO:0006511]	proteasome regulatory particle, lid subcomplex [GO:0008541]; proteasome storage granule [GO:0034515]	proteasome-mediated ubiquitin-dependent protein catabolic process [GO:0043161]; ubiquitin-dependent protein catabolic process [GO:0006511]
SUCB_YEAST	2.0022	-0.746099	P53312	Succinate--CoA ligase [ADP-forming] subunit beta, mitochondrial (EC 6.2.1.5) (Succinyl-CoA synthetase beta chain) (SCS-beta)	LSC2 YGR244C G8625	427	mitochondrion [GO:0005739]; ATP binding [GO:0005524]; copper ion binding [GO:0005507]; succinate-CoA ligase (ADP-forming) activity [GO:0004775]; response to cadmium ion [GO:0046686]; succinyl-CoA metabolic process [GO:0006104]; tricarboxylic acid cycle [GO:0006099]	mitochondrion [GO:0005739]	response to cadmium ion [GO:0046686]; succinyl-CoA metabolic process [GO:0006104]; tricarboxylic acid cycle [GO:0006099]	ATP binding [GO:0005524]; copper ion binding [GO:0005507]; succinate-CoA ligase (ADP-forming) activity [GO:0004775]
ARB1_YEAST	1.73448	-0.738421	P40024	ABC transporter ATP-binding protein ARB1 (ATP-binding cassette protein involved in ribosome biogenesis 1)	ARB1 YER036C	610	cytoplasm [GO:0005737]; nucleus [GO:0005634]; ATP binding [GO:0005524]; ATPase activity, uncoupled [GO:0042624]; ribosomal small subunit export from nucleus [GO:0000056]; ribosome biogenesis [GO:0042254]	cytoplasm [GO:0005737]; nucleus [GO:0005634]	ribosomal small subunit export from nucleus [GO:0000056]; ribosome biogenesis [GO:0042254]	ATPase activity, uncoupled [GO:0042624]; ATP binding [GO:0005524]
BBC1_YEAST	1.84708	-0.736934	P47068	Myosin tail region-interacting protein MTI1 (Protein BBC1)	BBC1 MTI1 YJL020C J1286 J1305 YJL021C	1157	actin cortical patch [GO:0030479]; myosin I binding [GO:0017024]; actin cytoskeleton organization [GO:0030036]; cytoskeleton organization [GO:0007010]; negative regulation of Arp2/3 complex-mediated actin nucleation [GO:0034316]	actin cortical patch [GO:0030479]	actin cytoskeleton organization [GO:0030036]; cytoskeleton organization [GO:0007010]; negative regulation of Arp2/3 complex-mediated actin nucleation [GO:0034316]	myosin I binding [GO:0017024]
HFD1_YEAST	2.51599	-0.716999	Q04458	Fatty aldehyde dehydrogenase HFD1 (EC 1.2.1.3)	HFD1 YMR110C YM9718.09C	532	endosome membrane [GO:0010008]; integral component of mitochondrial outer membrane [GO:0031307]; lipid particle [GO:0005811]; 3-chloroallyl aldehyde dehydrogenase activity [GO:0004028]; 4-hydroxybenzaldehyde dehydrogenase activity [GO:0018484]; aldehyde dehydrogenase [NAD(P)+] activity [GO:0004030]; carboxylate reductase activity [GO:0047770]; aldehyde catabolic process [GO:0046185]; cellular ald…	endosome membrane [GO:0010008]; integral component of mitochondrial outer membrane [GO:0031307]; lipid particle [GO:0005811]	aldehyde catabolic process [GO:0046185]; cellular aldehyde metabolic process [GO:0006081]; sphingolipid metabolic process [GO:0006665]; ubiquinone biosynthetic process from tyrosine [GO:0032180]	3-chloroallyl aldehyde dehydrogenase activity [GO:0004028]; 4-hydroxybenzaldehyde dehydrogenase activity [GO:0018484]; aldehyde dehydrogenase [NAD(P)+] activity [GO:0004030]; carboxylate reductase activity [GO:0047770]
CLH_YEAST	1.95504	-0.69878	P22137	Clathrin heavy chain	CHC1 YGL206C	1653	clathrin coat of coated pit [GO:0030132]; clathrin coat of trans-Golgi network vesicle [GO:0030130]; clathrin complex [GO:0071439]; clathrin vesicle coat [GO:0030125]; cytosol [GO:0005829]; clathrin light chain binding [GO:0032051]; structural molecule activity [GO:0005198]; clathrin coat assembly [GO:0048268]; endocytosis [GO:0006897]; Golgi to endosome transport [GO:0006895]; intracellular prot…	clathrin coat of coated pit [GO:0030132]; clathrin coat of trans-Golgi network vesicle [GO:0030130]; clathrin complex [GO:0071439]; clathrin vesicle coat [GO:0030125]; cytosol [GO:0005829]	clathrin coat assembly [GO:0048268]; endocytosis [GO:0006897]; Golgi to endosome transport [GO:0006895]; intracellular protein transport [GO:0006886]	clathrin light chain binding [GO:0032051]; structural molecule activity [GO:0005198]
RL31B_YEAST	2.29091	-0.694734	P0C2H9	60S ribosomal protein L31-B (L34) (Large ribosomal subunit protein eL31-B) (YL28)	RPL31B RPL34 RPL34B YLR406C	113	cytosolic large ribosomal subunit [GO:0022625]; structural constituent of ribosome [GO:0003735]; cytoplasmic translation [GO:0002181]; regulation of translational fidelity [GO:0006450]	cytosolic large ribosomal subunit [GO:0022625]	cytoplasmic translation [GO:0002181]; regulation of translational fidelity [GO:0006450]	structural constituent of ribosome [GO:0003735]
HIS8_YEAST	1.41997	-0.687326	P07172	Histidinol-phosphate aminotransferase (EC 2.6.1.9) (Imidazole acetol-phosphate transaminase)	HIS5 YIL116W	385	histidinol-phosphate transaminase activity [GO:0004400]; L-phenylalanine:2-oxoglutarate aminotransferase activity [GO:0080130]; pyridoxal phosphate binding [GO:0030170]; histidine biosynthetic process [GO:0000105]		histidine biosynthetic process [GO:0000105]	histidinol-phosphate transaminase activity [GO:0004400]; L-phenylalanine:2-oxoglutarate aminotransferase activity [GO:0080130]; pyridoxal phosphate binding [GO:0030170]
GCN1_YEAST	2.39011	-0.683642	P33892	eIF-2-alpha kinase activator GCN1 (General control non-derepressible protein 1) (Translational activator GCN1)	GCN1 YGL195W G1318	2672	cytosol [GO:0005829]; cytosolic ribosome [GO:0022626]; polysomal ribosome [GO:0042788]; polysome [GO:0005844]; ATP-dependent protein binding [GO:0043008]; protein kinase binding [GO:0019901]; protein kinase regulator activity [GO:0019887]; ribosome binding [GO:0043022]; translation initiation factor binding [GO:0031369]; cellular response to amino acid starvation [GO:0034198]; cellular response t…	cytosol [GO:0005829]; cytosolic ribosome [GO:0022626]; polysomal ribosome [GO:0042788]; polysome [GO:0005844]	cellular response to amino acid starvation [GO:0034198]; cellular response to benomyl [GO:0072755]; cellular response to hydrogen peroxide [GO:0070301]; cellular stress response to acidic pH [GO:1990451]; positive regulation of kinase activity [GO:0033674]; positive regulation of protein phosphorylation [GO:0001934]; positive regulation of translational initiation in response to starvation [GO:00…	ATP-dependent protein binding [GO:0043008]; protein kinase binding [GO:0019901]; protein kinase regulator activity [GO:0019887]; ribosome binding [GO:0043022]; translation initiation factor binding [GO:0031369]
QOR_YEAST	1.77705	-0.67128	P38230	Probable quinone oxidoreductase (EC 1.6.5.5) (NADPH:quinone reductase)	ZTA1 YBR046C YBR0421	334	2-alkenal reductase [NAD(P)] activity [GO:0032440]; AU-rich element binding [GO:0017091]; NADPH:quinone reductase activity [GO:0003960]; zinc ion binding [GO:0008270]; cellular response to oxidative stress [GO:0034599]		cellular response to oxidative stress [GO:0034599]	2-alkenal reductase [NAD(P)] activity [GO:0032440]; AU-rich element binding [GO:0017091]; NADPH:quinone reductase activity [GO:0003960]; zinc ion binding [GO:0008270]
RV167_YEAST	1.65493	-0.658532	P39743	Reduced viability upon starvation protein 167	RVS167 YDR388W D9509.8	482	actin cortical patch [GO:0030479]; mating projection tip [GO:0043332]; Rvs161p-Rvs167p complex [GO:1990528]; trans-Golgi network [GO:0005802]; actin binding [GO:0003779]; ARF guanyl-nucleotide exchange factor activity [GO:0005086]; calmodulin binding [GO:0005516]; cytoskeletal protein binding [GO:0008092]; identical protein binding [GO:0042802]; actin cortical patch localization [GO:0051666]; end…	actin cortical patch [GO:0030479]; mating projection tip [GO:0043332]; Rvs161p-Rvs167p complex [GO:1990528]; trans-Golgi network [GO:0005802]	actin cortical patch localization [GO:0051666]; endocytosis [GO:0006897]; lipid tube assembly [GO:0060988]; plasma membrane tubulation [GO:0097320]; vesicle-mediated transport [GO:0016192]	actin binding [GO:0003779]; ARF guanyl-nucleotide exchange factor activity [GO:0005086]; calmodulin binding [GO:0005516]; cytoskeletal protein binding [GO:0008092]; identical protein binding [GO:0042802]
RTN2_YEAST	1.36029	-0.65543	Q12443	Reticulon-like protein 2	RTN2 YDL204W D1062	393	cortical endoplasmic reticulum [GO:0032541]; endoplasmic reticulum membrane [GO:0005789]; endoplasmic reticulum tubular network [GO:0071782]; integral component of membrane [GO:0016021]; endoplasmic reticulum inheritance [GO:0048309]; endoplasmic reticulum tubular network maintenance [GO:0071788]; endoplasmic reticulum tubular network organization [GO:0071786]; ER-dependent peroxisome organizatio…	cortical endoplasmic reticulum [GO:0032541]; endoplasmic reticulum membrane [GO:0005789]; endoplasmic reticulum tubular network [GO:0071782]; integral component of membrane [GO:0016021]	endoplasmic reticulum inheritance [GO:0048309]; endoplasmic reticulum tubular network maintenance [GO:0071788]; endoplasmic reticulum tubular network organization [GO:0071786]; ER-dependent peroxisome organization [GO:0032581]; response to endoplasmic reticulum stress [GO:0034976]
QCR10_YEAST	1.94829	-0.65243	P37299	Cytochrome b-c1 complex subunit 10 (Complex III subunit 10) (Complex III subunit XI) (Ubiquinol-cytochrome c reductase complex 8.5 kDa protein)	QCR10 YHR001W-A YHR001BW	77	mitochondrial respiratory chain complex III [GO:0005750]; aerobic respiration [GO:0009060]; hydrogen ion transmembrane transport [GO:1902600]; mitochondrial electron transport, ubiquinol to cytochrome c [GO:0006122]	mitochondrial respiratory chain complex III [GO:0005750]	aerobic respiration [GO:0009060]; hydrogen ion transmembrane transport [GO:1902600]; mitochondrial electron transport, ubiquinol to cytochrome c [GO:0006122]
SDS22_YEAST	2.00063	-0.644522	P36047	Protein phosphatase 1 regulatory subunit SDS22	SDS22 EGP1 YKL193C	338	nucleus [GO:0005634]; protein phosphatase type 1 complex [GO:0000164]; protein phosphatase activator activity [GO:0072542]; protein serine/threonine phosphatase inhibitor activity [GO:0004865]; cell cycle [GO:0007049]; cell division [GO:0051301]; chromosome segregation [GO:0007059]; maintenance of protein location in nucleus [GO:0051457]	nucleus [GO:0005634]; protein phosphatase type 1 complex [GO:0000164]	cell cycle [GO:0007049]; cell division [GO:0051301]; chromosome segregation [GO:0007059]; maintenance of protein location in nucleus [GO:0051457]	protein phosphatase activator activity [GO:0072542]; protein serine/threonine phosphatase inhibitor activity [GO:0004865]
TREA_YEAST	2.72844	-0.635482	P32356	Neutral trehalase (EC 3.2.1.28) (Alpha,alpha-trehalase) (Alpha,alpha-trehalose glucohydrolase)	NTH1 NTH YDR001C YD8119.07C	751	cytoplasm [GO:0005737]; alpha,alpha-trehalase activity [GO:0004555]; calcium ion binding [GO:0005509]; cellular response to desiccation [GO:0071465]; trehalose catabolic process [GO:0005993]	cytoplasm [GO:0005737]	cellular response to desiccation [GO:0071465]; trehalose catabolic process [GO:0005993]	alpha,alpha-trehalase activity [GO:0004555]; calcium ion binding [GO:0005509]
CORO_YEAST	1.69134	-0.592958	Q06440	Coronin-like protein	CRN1 YLR429W L9576.2	651	actin cortical patch [GO:0030479]; actomyosin contractile ring [GO:0005826]; actin filament binding [GO:0051015]; microtubule binding [GO:0008017]; protein binding, bridging [GO:0030674]; actin cortical patch localization [GO:0051666]; actin filament organization [GO:0007015]; microtubule-based process [GO:0007017]; negative regulation of Arp2/3 complex-mediated actin nucleation [GO:0034316]; pos…	actin cortical patch [GO:0030479]; actomyosin contractile ring [GO:0005826]	actin cortical patch localization [GO:0051666]; actin filament organization [GO:0007015]; microtubule-based process [GO:0007017]; negative regulation of Arp2/3 complex-mediated actin nucleation [GO:0034316]; positive regulation of Arp2/3 complex-mediated actin nucleation [GO:2000601]	actin filament binding [GO:0051015]; microtubule binding [GO:0008017]; protein binding, bridging [GO:0030674]
BNA3_YEAST	1.4462	-0.589528	P47039	Probable kynurenine--oxoglutarate transaminase BNA3 (EC 2.6.1.7) (Biosynthesis of nicotinic acid protein 3) (Kynurenine aminotransferase)	BNA3 YJL060W J1138	444	cytoplasm [GO:0005737]; mitochondrion [GO:0005739]; 2-aminoadipate transaminase activity [GO:0047536]; kynurenine-oxoglutarate transaminase activity [GO:0016212]; pyridoxal phosphate binding [GO:0030170]; kynurenic acid biosynthetic process [GO:0034276]; L-kynurenine catabolic process [GO:0097053]	cytoplasm [GO:0005737]; mitochondrion [GO:0005739]	kynurenic acid biosynthetic process [GO:0034276]; L-kynurenine catabolic process [GO:0097053]	2-aminoadipate transaminase activity [GO:0047536]; kynurenine-oxoglutarate transaminase activity [GO:0016212]; pyridoxal phosphate binding [GO:0030170]
BDH1_YEAST	2.04079	-0.563914	P39714	(R,R)-butanediol dehydrogenase (EC 1.1.1.4)	BDH1 BDH YAL060W FUN49	382	cytoplasm [GO:0005737]; (R,R)-butanediol dehydrogenase activity [GO:0000721]; zinc ion binding [GO:0008270]; alcohol metabolic process [GO:0006066]; butanediol biosynthetic process [GO:0034079]	cytoplasm [GO:0005737]	alcohol metabolic process [GO:0006066]; butanediol biosynthetic process [GO:0034079]	(R,R)-butanediol dehydrogenase activity [GO:0000721]; zinc ion binding [GO:0008270]
PMT2_YEAST	1.63702	-0.551995	P31382	Dolichyl-phosphate-mannose--protein mannosyltransferase 2 (EC 2.4.1.109)	PMT2 FUN25 YAL023C	759	dolichyl-phosphate-mannose-protein mannosyltransferase Pmt1p-Pmt2p dimer complex [GO:0097582]; dolichyl-phosphate-mannose-protein mannosyltransferase Pmt5p-Pmt2p dimer complex [GO:0097584]; integral component of membrane [GO:0016021]; dolichyl-phosphate-mannose-protein mannosyltransferase activity [GO:0004169]; ER-associated misfolded protein catabolic process [GO:0071712]; fungal-type cell wall …	dolichyl-phosphate-mannose-protein mannosyltransferase Pmt1p-Pmt2p dimer complex [GO:0097582]; dolichyl-phosphate-mannose-protein mannosyltransferase Pmt5p-Pmt2p dimer complex [GO:0097584]; integral component of membrane [GO:0016021]	ER-associated misfolded protein catabolic process [GO:0071712]; fungal-type cell wall organization [GO:0031505]; protein exit from endoplasmic reticulum [GO:0032527]; protein O-linked glycosylation [GO:0006493]; protein O-linked mannosylation [GO:0035269]; regulation of endoplasmic reticulum unfolded protein response [GO:1900101]	dolichyl-phosphate-mannose-protein mannosyltransferase activity [GO:0004169]
TCPZ_YEAST	1.8603	-0.53599	P39079	T-complex protein 1 subunit zeta (TCP-1-zeta) (CCT-zeta)	CCT6 TCP20 TCP6 YDR188W YD9395.21	546	chaperonin-containing T-complex [GO:0005832]; ATP binding [GO:0005524]; protein binding involved in protein folding [GO:0044183]; unfolded protein binding [GO:0051082]; 'de novo' protein folding [GO:0006458]; chaperone-mediated protein folding [GO:0061077]; protein folding [GO:0006457]	chaperonin-containing T-complex [GO:0005832]	'de novo' protein folding [GO:0006458]; chaperone-mediated protein folding [GO:0061077]; protein folding [GO:0006457]	ATP binding [GO:0005524]; protein binding involved in protein folding [GO:0044183]; unfolded protein binding [GO:0051082]
XPO1_YEAST	2.76672	-0.530803	P30822	Exportin-1 (Chromosome region maintenance protein 1) (Karyopherin-124)	CRM1 KAP124 XPO1 YGR218W G8514	1084	cytoplasm [GO:0005737]; kinetochore [GO:0000776]; nucleus [GO:0005634]; perinuclear region of cytoplasm [GO:0048471]; spindle pole body [GO:0005816]; nuclear export signal receptor activity [GO:0005049]; protein transporter activity [GO:0008565]; Ran GTPase binding [GO:0008536]; mRNA export from nucleus [GO:0006406]; protein export from nucleus [GO:0006611]; protein localization to kinetochore [G…	cytoplasm [GO:0005737]; kinetochore [GO:0000776]; nucleus [GO:0005634]; perinuclear region of cytoplasm [GO:0048471]; spindle pole body [GO:0005816]	mRNA export from nucleus [GO:0006406]; protein export from nucleus [GO:0006611]; protein localization to kinetochore [GO:0034501]; regulation of protein export from nucleus [GO:0046825]; ribosomal large subunit export from nucleus [GO:0000055]; ribosomal small subunit export from nucleus [GO:0000056]	nuclear export signal receptor activity [GO:0005049]; protein transporter activity [GO:0008565]; Ran GTPase binding [GO:0008536]
CISY1_YEAST	3.52063	-0.508433	P00890	Citrate synthase, mitochondrial (EC 2.3.3.1)	CIT1 GLU3 LYS6 YNR001C N2019	479	cytosol [GO:0005829]; mitochondrial intermembrane space [GO:0005758]; mitochondrial matrix [GO:0005759]; mitochondrion [GO:0005739]; citrate (Si)-synthase activity [GO:0004108]; acetyl-CoA catabolic process [GO:0046356]; citrate metabolic process [GO:0006101]; glutamate biosynthetic process [GO:0006537]; protein targeting to mitochondrion [GO:0006626]; tricarboxylic acid cycle [GO:0006099]	cytosol [GO:0005829]; mitochondrial intermembrane space [GO:0005758]; mitochondrial matrix [GO:0005759]; mitochondrion [GO:0005739]	acetyl-CoA catabolic process [GO:0046356]; citrate metabolic process [GO:0006101]; glutamate biosynthetic process [GO:0006537]; protein targeting to mitochondrion [GO:0006626]; tricarboxylic acid cycle [GO:0006099]	citrate (Si)-synthase activity [GO:0004108]
CLU_YEAST	2.44358	-0.506185	Q03690	Clustered mitochondria protein 1 (Translation initiation factor 31) (eIF3-associated protein p135)	CLU1 TIF31 YMR012W YM8270.16	1277	cytoplasmic stress granule [GO:0010494]; eukaryotic translation initiation factor 3 complex [GO:0005852]; translation initiation factor activity [GO:0003743]; cytoplasmic translational initiation [GO:0002183]; intracellular distribution of mitochondria [GO:0048312]	cytoplasmic stress granule [GO:0010494]; eukaryotic translation initiation factor 3 complex [GO:0005852]	cytoplasmic translational initiation [GO:0002183]; intracellular distribution of mitochondria [GO:0048312]	translation initiation factor activity [GO:0003743]
RIB4_YEAST	1.7142	-0.496247	P50861	6,7-dimethyl-8-ribityllumazine synthase (DMRL synthase) (LS) (Lumazine synthase) (EC 2.5.1.78)	RIB4 YOL143C	169	mitochondrial intermembrane space [GO:0005758]; riboflavin synthase complex [GO:0009349]; 6,7-dimethyl-8-ribityllumazine synthase activity [GO:0000906]; transferase activity [GO:0016740]; riboflavin biosynthetic process [GO:0009231]	mitochondrial intermembrane space [GO:0005758]; riboflavin synthase complex [GO:0009349]	riboflavin biosynthetic process [GO:0009231]	6,7-dimethyl-8-ribityllumazine synthase activity [GO:0000906]; transferase activity [GO:0016740]
NCPR_YEAST	1.65196	-0.496182	P16603	NADPH--cytochrome P450 reductase (CPR) (P450R) (EC 1.6.2.4)	NCP1 CPR1 NCPR1 PRD1 YHR042W	691	endoplasmic reticulum membrane [GO:0005789]; integral component of membrane [GO:0016021]; mitochondrial outer membrane [GO:0005741]; plasma membrane [GO:0005886]; electron carrier activity [GO:0009055]; FMN binding [GO:0010181]; NADPH-hemoprotein reductase activity [GO:0003958]; ergosterol biosynthetic process [GO:0006696]	endoplasmic reticulum membrane [GO:0005789]; integral component of membrane [GO:0016021]; mitochondrial outer membrane [GO:0005741]; plasma membrane [GO:0005886]	ergosterol biosynthetic process [GO:0006696]	electron carrier activity [GO:0009055]; FMN binding [GO:0010181]; NADPH-hemoprotein reductase activity [GO:0003958]
DCPS_YEAST	2.10957	-0.49521	Q06151	m7GpppX diphosphatase (EC 3.6.1.59) (DCS-1) (Hint-related 7meGMP-directed hydrolase 1) (Protein Dcs1p) (Scavenger mRNA-decapping enzyme DcpS)	DCS1 YLR270W	350	cytoplasm [GO:0005737]; P-body [GO:0000932]; perinuclear region of cytoplasm [GO:0048471]; exoribonuclease activator activity [GO:0044692]; hydrolase activity, acting on acid anhydrides, in phosphorus-containing anhydrides [GO:0016818]; m7G(5')pppN diphosphatase activity [GO:0050072]; protein heterodimerization activity [GO:0046982]; protein homodimerization activity [GO:0042803]; RNA 7-methylgua…	cytoplasm [GO:0005737]; P-body [GO:0000932]; perinuclear region of cytoplasm [GO:0048471]	cellular response to starvation [GO:0009267]; deadenylation-dependent decapping of nuclear-transcribed mRNA [GO:0000290]; nuclear-transcribed mRNA catabolic process, deadenylation-dependent decay [GO:0000288]; nuclear-transcribed mRNA catabolic process, deadenylation-independent decay [GO:0031086]; positive regulation of exoribonuclease activity [GO:1901919]; regulation of cell aging [GO:0090342]…	exoribonuclease activator activity [GO:0044692]; hydrolase activity, acting on acid anhydrides, in phosphorus-containing anhydrides [GO:0016818]; m7G(5')pppN diphosphatase activity [GO:0050072]; protein heterodimerization activity [GO:0046982]; protein homodimerization activity [GO:0042803]; RNA 7-methylguanosine cap binding [GO:0000340]
ATPG_YEAST	1.85534	-0.494826	P38077	ATP synthase subunit gamma, mitochondrial (F-ATPase gamma subunit)	ATP3 ATP3a ATP3b YBR039W YBR0408	311	mitochondrial proton-transporting ATP synthase, central stalk [GO:0005756]; proton-transporting ATP synthase activity, rotational mechanism [GO:0046933]; ATP synthesis coupled proton transport [GO:0015986]	mitochondrial proton-transporting ATP synthase, central stalk [GO:0005756]	ATP synthesis coupled proton transport [GO:0015986]	proton-transporting ATP synthase activity, rotational mechanism [GO:0046933]
AYR1_YEAST	1.58047	-0.480149	P40471	NADPH-dependent 1-acyldihydroxyacetone phosphate reductase (ADR) (EC 1.1.1.101) (1-acyl DHAP reductase) (Acyl/alkyl DHAP reductase) (Acylglycerone-phosphate reductase)	AYR1 YIL124W	297	endoplasmic reticulum [GO:0005783]; lipid particle [GO:0005811]; acylglycerone-phosphate reductase activity [GO:0000140]; triglyceride lipase activity [GO:0004806]; phosphatidic acid biosynthetic process [GO:0006654]; triglyceride catabolic process [GO:0019433]	endoplasmic reticulum [GO:0005783]; lipid particle [GO:0005811]	phosphatidic acid biosynthetic process [GO:0006654]; triglyceride catabolic process [GO:0019433]	acylglycerone-phosphate reductase activity [GO:0000140]; triglyceride lipase activity [GO:0004806]
SYG_YEAST	2.63099	-0.462422	P38088	Glycine--tRNA ligase 1, mitochondrial (EC 6.1.1.14) (Diadenosine tetraphosphate synthetase) (AP-4-A synthetase) (Glycyl-tRNA synthetase 1) (GlyRS 1) (GlyRS1)	GRS1 YBR121C YBR0917	690	cytoplasm [GO:0005737]; mitochondrial matrix [GO:0005759]; mitochondrion [GO:0005739]; ATP binding [GO:0005524]; glycine-tRNA ligase activity [GO:0004820]; protein dimerization activity [GO:0046983]; diadenosine tetraphosphate biosynthetic process [GO:0015966]; DNA-templated transcription, termination [GO:0006353]; glycyl-tRNA aminoacylation [GO:0006426]; mitochondrial glycyl-tRNA aminoacylation …	cytoplasm [GO:0005737]; mitochondrial matrix [GO:0005759]; mitochondrion [GO:0005739]	diadenosine tetraphosphate biosynthetic process [GO:0015966]; DNA-templated transcription, termination [GO:0006353]; glycyl-tRNA aminoacylation [GO:0006426]; mitochondrial glycyl-tRNA aminoacylation [GO:0070150]	ATP binding [GO:0005524]; glycine-tRNA ligase activity [GO:0004820]; protein dimerization activity [GO:0046983]
VATD_YEAST	1.85244	-0.441449	P32610	V-type proton ATPase subunit D (V-ATPase subunit D) (Vacuolar proton pump subunit D)	VMA8 YEL051W SYGP-ORF11	256	fungal-type vacuole membrane [GO:0000329]; Golgi apparatus [GO:0005794]; plasma membrane [GO:0005886]; vacuolar proton-transporting V-type ATPase, V1 domain [GO:0000221]; proton-transporting ATPase activity, rotational mechanism [GO:0046961]; vacuolar acidification [GO:0007035]	fungal-type vacuole membrane [GO:0000329]; Golgi apparatus [GO:0005794]; plasma membrane [GO:0005886]; vacuolar proton-transporting V-type ATPase, V1 domain [GO:0000221]	vacuolar acidification [GO:0007035]	proton-transporting ATPase activity, rotational mechanism [GO:0046961]
NEW1_YEAST	1.79319	-0.421855	Q08972	[NU+] prion formation protein 1	NEW1 YPL226W P1445	1196	cytoplasm [GO:0005737]; nucleus [GO:0005634]; polysome [GO:0005844]; ATP binding [GO:0005524]; ATPase activity [GO:0016887]; poly(A)+ mRNA export from nucleus [GO:0016973]; ribosomal small subunit biogenesis [GO:0042274]	cytoplasm [GO:0005737]; nucleus [GO:0005634]; polysome [GO:0005844]	poly(A)+ mRNA export from nucleus [GO:0016973]; ribosomal small subunit biogenesis [GO:0042274]	ATPase activity [GO:0016887]; ATP binding [GO:0005524]
GPD2_YEAST	1.76115	-0.419456	P41911	Glycerol-3-phosphate dehydrogenase [NAD(+)] 2, mitochondrial (EC 1.1.1.8)	GPD2 GPD3 YOL059W O1222	440	cytosol [GO:0005829]; glycerol-3-phosphate dehydrogenase complex [GO:0009331]; mitochondrion [GO:0005739]; glycerol-3-phosphate dehydrogenase [NAD+] activity [GO:0004367]; NAD binding [GO:0051287]; protein homodimerization activity [GO:0042803]; glycerol metabolic process [GO:0006071]; glycerol-3-phosphate catabolic process [GO:0046168]; NADH oxidation [GO:0006116]	cytosol [GO:0005829]; glycerol-3-phosphate dehydrogenase complex [GO:0009331]; mitochondrion [GO:0005739]	glycerol-3-phosphate catabolic process [GO:0046168]; glycerol metabolic process [GO:0006071]; NADH oxidation [GO:0006116]	glycerol-3-phosphate dehydrogenase [NAD+] activity [GO:0004367]; NAD binding [GO:0051287]; protein homodimerization activity [GO:0042803]
RPN1_YEAST	3.78238	-0.418758	P38764	26S proteasome regulatory subunit RPN1 (HMG-CoA reductase degradation protein 2) (Proteasome non-ATPase subunit 1)	RPN1 HRD2 NAS1 RPD1 YHR027C	993	nucleus [GO:0005634]; proteasome regulatory particle, base subcomplex [GO:0008540]; proteasome storage granule [GO:0034515]; enzyme regulator activity [GO:0030234]; protein binding, bridging [GO:0030674]; proteasome-mediated ubiquitin-dependent protein catabolic process [GO:0043161]; regulation of protein catabolic process [GO:0042176]; ubiquitin-dependent protein catabolic process [GO:0006511]	nucleus [GO:0005634]; proteasome regulatory particle, base subcomplex [GO:0008540]; proteasome storage granule [GO:0034515]	proteasome-mediated ubiquitin-dependent protein catabolic process [GO:0043161]; regulation of protein catabolic process [GO:0042176]; ubiquitin-dependent protein catabolic process [GO:0006511]	enzyme regulator activity [GO:0030234]; protein binding, bridging [GO:0030674]
IF2P_YEAST	3.04971	-0.371809	P39730	Eukaryotic translation initiation factor 5B (eIF-5B) (EC 3.6.5.3) (Translation initiation factor IF-2)	FUN12 YAL035W	1002	cytoplasmic stress granule [GO:0010494]; cytosolic small ribosomal subunit [GO:0022627]; eukaryotic 48S preinitiation complex [GO:0033290]; GTP binding [GO:0005525]; GTPase activity [GO:0003924]; metal ion binding [GO:0046872]; ribosome binding [GO:0043022]; translation initiation factor activity [GO:0003743]; translation initiation factor binding [GO:0031369]; formation of cytoplasmic translatio…	cytoplasmic stress granule [GO:0010494]; cytosolic small ribosomal subunit [GO:0022627]; eukaryotic 48S preinitiation complex [GO:0033290]	formation of cytoplasmic translation initiation complex [GO:0001732]; maturation of SSU-rRNA from tricistronic rRNA transcript (SSU-rRNA, 5.8S rRNA, LSU-rRNA) [GO:0000462]; regulation of translational initiation [GO:0006446]; ribosome assembly [GO:0042255]	GTPase activity [GO:0003924]; GTP binding [GO:0005525]; metal ion binding [GO:0046872]; ribosome binding [GO:0043022]; translation initiation factor activity [GO:0003743]; translation initiation factor binding [GO:0031369]
BMH1_YEAST	3.45641	0.322834	P29311	Protein BMH1	BMH1 YER177W	267	cytoplasm [GO:0005737]; cytoplasmic stress granule [GO:0010494]; nucleus [GO:0005634]; DNA replication origin binding [GO:0003688]; phosphoserine binding [GO:0050815]; protein domain specific binding [GO:0019904]; RNA polymerase II activating transcription factor binding [GO:0001102]; aggresome assembly [GO:0070842]; ascospore formation [GO:0030437]; DNA damage checkpoint [GO:0000077]; fungal-typ…	cytoplasm [GO:0005737]; cytoplasmic stress granule [GO:0010494]; nucleus [GO:0005634]	aggresome assembly [GO:0070842]; ascospore formation [GO:0030437]; DNA damage checkpoint [GO:0000077]; fungal-type cell wall chitin biosynthetic process [GO:0034221]; glycogen metabolic process [GO:0005977]; mitotic spindle orientation checkpoint [GO:0031578]; negative regulation of apoptotic process [GO:0043066]; negative regulation of transcription from RNA polymerase II promoter [GO:0000122]; …	DNA replication origin binding [GO:0003688]; phosphoserine binding [GO:0050815]; protein domain specific binding [GO:0019904]; RNA polymerase II activating transcription factor binding [GO:0001102]
GVP36_YEAST	2.46432	0.326955	P40531	Protein GVP36 (36 kDa Golgi vesicle protein)	GVP36 YIL041W	326	integral component of Golgi membrane [GO:0030173]; endocytosis [GO:0006897]; establishment or maintenance of actin cytoskeleton polarity [GO:0030950]; vacuole organization [GO:0007033]	integral component of Golgi membrane [GO:0030173]	endocytosis [GO:0006897]; establishment or maintenance of actin cytoskeleton polarity [GO:0030950]; vacuole organization [GO:0007033]
FAS1_YEAST	3.07656	0.331418	P07149	Fatty acid synthase subunit beta (EC 2.3.1.86) [Includes: 3-hydroxyacyl-[acyl-carrier-protein] dehydratase (EC 4.2.1.59); Enoyl-[acyl-carrier-protein] reductase [NADH] (EC 1.3.1.9); [Acyl-carrier-protein] acetyltransferase (EC 2.3.1.38); [Acyl-carrier-protein] malonyltransferase (EC 2.3.1.39); S-acyl fatty acid synthase thioesterase (EC 3.1.2.14)]	FAS1 YKL182W	2051	cytosol [GO:0005829]; fatty acid synthase complex [GO:0005835]; lipid particle [GO:0005811]; 3-hydroxyacyl-[acyl-carrier-protein] dehydratase activity [GO:0019171]; 3-hydroxyoctanoyl-[acyl-carrier-protein] dehydratase activity [GO:0047451]; [acyl-carrier-protein] S-acetyltransferase activity [GO:0004313]; [acyl-carrier-protein] S-malonyltransferase activity [GO:0004314]; enoyl-[acyl-carrier-prote…	cytosol [GO:0005829]; fatty acid synthase complex [GO:0005835]; lipid particle [GO:0005811]	long-chain fatty acid biosynthetic process [GO:0042759]	[acyl-carrier-protein] S-acetyltransferase activity [GO:0004313]; [acyl-carrier-protein] S-malonyltransferase activity [GO:0004314]; 3-hydroxyacyl-[acyl-carrier-protein] dehydratase activity [GO:0019171]; 3-hydroxyoctanoyl-[acyl-carrier-protein] dehydratase activity [GO:0047451]; enoyl-[acyl-carrier-protein] reductase (NADH) activity [GO:0004318]; enoyl-[acyl-carrier-protein] reductase (NADPH, B-…
RS21A_YEAST	2.43663	0.342394	P0C0V8	40S ribosomal protein S21-A (S26) (Small ribosomal subunit protein eS21-A) (YS25)	RPS21A RPS25 RPS25A RPS26A YKR057W	87	cytosolic small ribosomal subunit [GO:0022627]; structural constituent of ribosome [GO:0003735]; cytoplasmic translation [GO:0002181]; endonucleolytic cleavage in ITS1 to separate SSU-rRNA from 5.8S rRNA and LSU-rRNA from tricistronic rRNA transcript (SSU-rRNA, 5.8S rRNA, LSU-rRNA) [GO:0000447]; endonucleolytic cleavage to generate mature 3'-end of SSU-rRNA from (SSU-rRNA, 5.8S rRNA, LSU-rRNA) [G…	cytosolic small ribosomal subunit [GO:0022627]	cytoplasmic translation [GO:0002181]; endonucleolytic cleavage in ITS1 to separate SSU-rRNA from 5.8S rRNA and LSU-rRNA from tricistronic rRNA transcript (SSU-rRNA, 5.8S rRNA, LSU-rRNA) [GO:0000447]; endonucleolytic cleavage to generate mature 3'-end of SSU-rRNA from (SSU-rRNA, 5.8S rRNA, LSU-rRNA) [GO:0000461]	structural constituent of ribosome [GO:0003735]
BLH1_YEAST	2.3391	0.355779	Q01532	Cysteine proteinase 1, mitochondrial (EC 3.4.22.40) (Bleomycin hydrolase) (BLM hydrolase) (Homocysteine-thiolactonase) (HTLase) (Hcy-thiolactonase) (Leucine aminopeptidase 3) (Y3)	LAP3 BLH1 GAL6 YCP1 YNL239W N1118	483	cytoplasm [GO:0005737]; mitochondrion [GO:0005739]; cysteine-type endopeptidase activity [GO:0004197]; cysteine-type peptidase activity [GO:0008234]; double-stranded DNA binding [GO:0003690]; mRNA binding [GO:0003729]; RNA polymerase II core promoter proximal region sequence-specific DNA binding [GO:0000978]; single-stranded DNA binding [GO:0003697]; homocysteine catabolic process [GO:0043418]; n…	cytoplasm [GO:0005737]; mitochondrion [GO:0005739]	homocysteine catabolic process [GO:0043418]; negative regulation of transcription from RNA polymerase II promoter [GO:0000122]; response to antibiotic [GO:0046677]; response to toxic substance [GO:0009636]	cysteine-type endopeptidase activity [GO:0004197]; cysteine-type peptidase activity [GO:0008234]; double-stranded DNA binding [GO:0003690]; mRNA binding [GO:0003729]; RNA polymerase II core promoter proximal region sequence-specific DNA binding [GO:0000978]; single-stranded DNA binding [GO:0003697]
INO1_YEAST	2.01036	0.368199	P11986	Inositol-3-phosphate synthase (MIP synthase) (EC 5.5.1.4) (Myo-inositol 1-phosphate synthase) (IPS) (MI-1-P synthase)	INO1 YJL153C J0610	533	cytoplasm [GO:0005737]; inositol-3-phosphate synthase activity [GO:0004512]; inositol biosynthetic process [GO:0006021]; phospholipid biosynthetic process [GO:0008654]	cytoplasm [GO:0005737]	inositol biosynthetic process [GO:0006021]; phospholipid biosynthetic process [GO:0008654]	inositol-3-phosphate synthase activity [GO:0004512]
RL31A_YEAST	2.19511	0.373005	P0C2H8	60S ribosomal protein L31-A (L34) (Large ribosomal subunit protein eL31-A) (YL28)	RPL31A RPL34 RPL34A YDL075W D2478	113	cytosolic large ribosomal subunit [GO:0022625]; structural constituent of ribosome [GO:0003735]; cytoplasmic translation [GO:0002181]; regulation of translational fidelity [GO:0006450]	cytosolic large ribosomal subunit [GO:0022625]	cytoplasmic translation [GO:0002181]; regulation of translational fidelity [GO:0006450]	structural constituent of ribosome [GO:0003735]
RL20B_YEAST	2.23504	0.376952	P0CX24	60S ribosomal protein L20-B (L18a) (Large ribosomal subunit protein eL20-B)	RPL20B RPL18A1 RPL18B YOR312C O6116	172	cytosolic large ribosomal subunit [GO:0022625]; RNA binding [GO:0003723]; structural constituent of ribosome [GO:0003735]; cytoplasmic translation [GO:0002181]; translation [GO:0006412]	cytosolic large ribosomal subunit [GO:0022625]	cytoplasmic translation [GO:0002181]; translation [GO:0006412]	RNA binding [GO:0003723]; structural constituent of ribosome [GO:0003735]
RL27A_YEAST	1.94602	0.377325	P0C2H6	60S ribosomal protein L27-A (Large ribosomal subunit protein eL27-A)	RPL27A RPL27 YHR010W	136	cytosolic large ribosomal subunit [GO:0022625]; structural constituent of ribosome [GO:0003735]; cytoplasmic translation [GO:0002181]	cytosolic large ribosomal subunit [GO:0022625]	cytoplasmic translation [GO:0002181]	structural constituent of ribosome [GO:0003735]
SYEC_YEAST	2.9988	0.378744	P46655	Glutamate--tRNA ligase, cytoplasmic (EC 6.1.1.17) (Glutamyl-tRNA synthetase) ((c)ERS) (GluRS) (P85)	GUS1 YGL245W G0583 HRB724	708	cytoplasm [GO:0005737]; cytoplasmic stress granule [GO:0010494]; cytosol [GO:0005829]; methionyl glutamyl tRNA synthetase complex [GO:0017102]; mitochondrion [GO:0005739]; ATP binding [GO:0005524]; glutamate-tRNA ligase activity [GO:0004818]; glutamyl-tRNA aminoacylation [GO:0006424]	cytoplasm [GO:0005737]; cytoplasmic stress granule [GO:0010494]; cytosol [GO:0005829]; methionyl glutamyl tRNA synthetase complex [GO:0017102]; mitochondrion [GO:0005739]	glutamyl-tRNA aminoacylation [GO:0006424]	ATP binding [GO:0005524]; glutamate-tRNA ligase activity [GO:0004818]
IF4E_YEAST	2.16264	0.387652	P07260	Eukaryotic translation initiation factor 4E (eIF-4E) (eIF4E) (eIF-4F 25 kDa subunit) (mRNA cap-binding protein)	CDC33 TIF45 YOL139C	213	cytoplasm [GO:0005737]; cytoplasmic stress granule [GO:0010494]; eukaryotic translation initiation factor 4F complex [GO:0016281]; nucleus [GO:0005634]; ribosome [GO:0005840]; phosphatidylinositol-3-phosphate binding [GO:0032266]; translation initiation factor activity [GO:0003743]; nuclear-transcribed mRNA catabolic process, nonsense-mediated decay [GO:0000184]; regulation of cell cycle [GO:0051…	cytoplasm [GO:0005737]; cytoplasmic stress granule [GO:0010494]; eukaryotic translation initiation factor 4F complex [GO:0016281]; nucleus [GO:0005634]; ribosome [GO:0005840]	nuclear-transcribed mRNA catabolic process, nonsense-mediated decay [GO:0000184]; regulation of cell cycle [GO:0051726]; regulation of translation [GO:0006417]; translational initiation [GO:0006413]	phosphatidylinositol-3-phosphate binding [GO:0032266]; translation initiation factor activity [GO:0003743]
RL32_YEAST	1.99725	0.395073	P38061	60S ribosomal protein L32 (Large ribosomal subunit protein eL32)	RPL32 YBL092W YBL0838	130	cytosolic large ribosomal subunit [GO:0022625]; structural constituent of ribosome [GO:0003735]; cytoplasmic translation [GO:0002181]	cytosolic large ribosomal subunit [GO:0022625]	cytoplasmic translation [GO:0002181]	structural constituent of ribosome [GO:0003735]
RS24B_YEAST	1.99531	0.399806	P0CX32	40S ribosomal protein S24-B (RP50) (Small ribosomal subunit protein eS24-B)	RPS24B RPS24EB YIL069C	135	cytosolic small ribosomal subunit [GO:0022627]; structural constituent of ribosome [GO:0003735]; cytoplasmic translation [GO:0002181]; maturation of SSU-rRNA from tricistronic rRNA transcript (SSU-rRNA, 5.8S rRNA, LSU-rRNA) [GO:0000462]	cytosolic small ribosomal subunit [GO:0022627]	cytoplasmic translation [GO:0002181]; maturation of SSU-rRNA from tricistronic rRNA transcript (SSU-rRNA, 5.8S rRNA, LSU-rRNA) [GO:0000462]	structural constituent of ribosome [GO:0003735]
KAR_YEAST	2.69295	0.404314	Q07551	NADPH-dependent alpha-keto amide reductase (AKR-E) (EC 1.2.1.-) (YKAR)	YDL124W D2240	312	cytoplasm [GO:0005737]; nucleus [GO:0005634]; alditol:NADP+ 1-oxidoreductase activity [GO:0004032]; aldo-keto reductase (NADP) activity [GO:0004033]; alpha-keto amide reductase activity [GO:0051268]; alpha-keto ester reductase activity [GO:0051269]; cellular amide metabolic process [GO:0043603]; cellular aromatic compound metabolic process [GO:0006725]; cellular ketone metabolic process [GO:00421…	cytoplasm [GO:0005737]; nucleus [GO:0005634]	cellular amide metabolic process [GO:0043603]; cellular aromatic compound metabolic process [GO:0006725]; cellular ketone metabolic process [GO:0042180]; cellular response to oxidative stress [GO:0034599]	alditol:NADP+ 1-oxidoreductase activity [GO:0004032]; aldo-keto reductase (NADP) activity [GO:0004033]; alpha-keto amide reductase activity [GO:0051268]; alpha-keto ester reductase activity [GO:0051269]
CYS3_YEAST	2.36496	0.406221	P31373	Cystathionine gamma-lyase (EC 4.4.1.1) (Gamma-cystathionase) (Sulfur transfer protein 1)	CYS3 CYI1 STR1 YAL012W FUN35	394	cytoplasm [GO:0005737]; cystathionine gamma-lyase activity [GO:0004123]; cystathionine gamma-synthase activity [GO:0003962]; identical protein binding [GO:0042802]; L-cysteine desulfhydrase activity [GO:0080146]; L-cystine L-cysteine-lyase (deaminating) [GO:0044540]; pyridoxal phosphate binding [GO:0030170]; 'de novo' L-methionine biosynthetic process [GO:0071266]; cysteine biosynthetic process […	cytoplasm [GO:0005737]	'de novo' L-methionine biosynthetic process [GO:0071266]; cysteine biosynthetic process [GO:0019344]; cysteine biosynthetic process via cystathionine [GO:0019343]; transsulfuration [GO:0019346]	cystathionine gamma-lyase activity [GO:0004123]; cystathionine gamma-synthase activity [GO:0003962]; identical protein binding [GO:0042802]; L-cysteine desulfhydrase activity [GO:0080146]; L-cystine L-cysteine-lyase (deaminating) [GO:0044540]; pyridoxal phosphate binding [GO:0030170]
EF1G2_YEAST	2.13092	0.407783	P36008	Elongation factor 1-gamma 2 (EF-1-gamma 2) (Eukaryotic elongation factor 1Bgamma 2) (eEF1Bgamma 2) (Translation elongation factor 1B gamma 2)	TEF4 EFC1 YKL081W	412	cytoplasmic stress granule [GO:0010494]; eukaryotic translation elongation factor 1 complex [GO:0005853]; nucleus [GO:0005634]; ribosome [GO:0005840]; guanyl-nucleotide exchange factor activity [GO:0005085]; translation elongation factor activity [GO:0003746]; translational elongation [GO:0006414]	cytoplasmic stress granule [GO:0010494]; eukaryotic translation elongation factor 1 complex [GO:0005853]; nucleus [GO:0005634]; ribosome [GO:0005840]	translational elongation [GO:0006414]	guanyl-nucleotide exchange factor activity [GO:0005085]; translation elongation factor activity [GO:0003746]
SEC4_YEAST	1.903	0.409366	P07560	Ras-related protein SEC4 (Suppressor of RHO3 protein 6)	SEC4 SRO6 YFL005W	215	endosome [GO:0005768]; incipient cellular bud site [GO:0000131]; mating projection tip [GO:0043332]; plasma membrane [GO:0005886]; transport vesicle [GO:0030133]; transport vesicle membrane [GO:0030658]; vesicle [GO:0031982]; GTP binding [GO:0005525]; GTPase activity [GO:0003924]; ascospore-type prospore assembly [GO:0031321]; autophagy [GO:0006914]; exocytosis [GO:0006887]; Golgi to plasma membr…	endosome [GO:0005768]; incipient cellular bud site [GO:0000131]; mating projection tip [GO:0043332]; plasma membrane [GO:0005886]; transport vesicle [GO:0030133]; transport vesicle membrane [GO:0030658]; vesicle [GO:0031982]	ascospore-type prospore assembly [GO:0031321]; autophagy [GO:0006914]; exocytosis [GO:0006887]; Golgi to plasma membrane transport [GO:0006893]; membrane addition at site of cytokinesis [GO:0007107]; protein localization to plasma membrane [GO:0072659]; protein secretion [GO:0009306]; regulation of exocytosis [GO:0017157]; vesicle docking involved in exocytosis [GO:0006904]; vesicle fusion [GO:00…	GTPase activity [GO:0003924]; GTP binding [GO:0005525]
YM71_YEAST	1.95031	0.417619	Q05016	NADP-dependent 3-hydroxy acid dehydrogenase (L-allo-threonine dehydrogenase) (EC 1.1.1.381)	YMR226C YM9959.08C	267	cytoplasm [GO:0005737]; nucleus [GO:0005634]; carbonyl reductase (NADPH) activity [GO:0004090]; oxidoreductase activity [GO:0016491]; serine 3-dehydrogenase activity [GO:0031132]; organic substance catabolic process [GO:1901575]	cytoplasm [GO:0005737]; nucleus [GO:0005634]	organic substance catabolic process [GO:1901575]	carbonyl reductase (NADPH) activity [GO:0004090]; oxidoreductase activity [GO:0016491]; serine 3-dehydrogenase activity [GO:0031132]
RS28A_YEAST	1.83104	0.425885	Q3E7X9	40S ribosomal protein S28-A (S33) (Small ribosomal subunit protein eS28-A) (YS27)	RPS28A RPS33 RPS33A YOR167C O3600	67	cytosolic small ribosomal subunit [GO:0022627]; RNA binding [GO:0003723]; structural constituent of ribosome [GO:0003735]; cytoplasmic translation [GO:0002181]; maturation of SSU-rRNA [GO:0030490]; positive regulation of nuclear-transcribed mRNA catabolic process, deadenylation-dependent decay [GO:1900153]; ribosomal small subunit assembly [GO:0000028]; rRNA export from nucleus [GO:0006407]	cytosolic small ribosomal subunit [GO:0022627]	cytoplasmic translation [GO:0002181]; maturation of SSU-rRNA [GO:0030490]; positive regulation of nuclear-transcribed mRNA catabolic process, deadenylation-dependent decay [GO:1900153]; ribosomal small subunit assembly [GO:0000028]; rRNA export from nucleus [GO:0006407]	RNA binding [GO:0003723]; structural constituent of ribosome [GO:0003735]
HOSM_YEAST	2.96752	0.438161	Q12122	Homocitrate synthase, mitochondrial (EC 2.3.3.14)	LYS21 YDL131W D2195	440	mitochondrion [GO:0005739]; nucleus [GO:0005634]; homocitrate synthase activity [GO:0004410]; lysine biosynthetic process via aminoadipic acid [GO:0019878]	mitochondrion [GO:0005739]; nucleus [GO:0005634]	lysine biosynthetic process via aminoadipic acid [GO:0019878]	homocitrate synthase activity [GO:0004410]
CYPC_YEAST	2.06231	0.439466	P25719	Peptidyl-prolyl cis-trans isomerase C, mitochondrial (PPIase C) (EC 5.2.1.8) (Cyclophilin C) (PPI-III) (Rotamase C)	CPR3 CYP3 YML078W	182	mitochondrial matrix [GO:0005759]; mitochondrion [GO:0005739]; peptidyl-prolyl cis-trans isomerase activity [GO:0003755]; apoptotic process [GO:0006915]; protein folding [GO:0006457]	mitochondrial matrix [GO:0005759]; mitochondrion [GO:0005739]	apoptotic process [GO:0006915]; protein folding [GO:0006457]	peptidyl-prolyl cis-trans isomerase activity [GO:0003755]
RS3_YEAST	2.58599	0.440385	P05750	40S ribosomal protein S3 (RP13) (Small ribosomal subunit protein uS3) (YS3)	RPS3 SUF14 YNL178W N1653	240	cytosolic small ribosomal subunit [GO:0022627]; nucleus [GO:0005634]; preribosome, small subunit precursor [GO:0030688]; damaged DNA binding [GO:0003684]; DNA-(apurinic or apyrimidinic site) lyase activity [GO:0003906]; oxidized purine nucleobase lesion DNA N-glycosylase activity [GO:0008534]; RNA binding [GO:0003723]; structural constituent of ribosome [GO:0003735]; cytoplasmic translation [GO:0…	cytosolic small ribosomal subunit [GO:0022627]; nucleus [GO:0005634]; preribosome, small subunit precursor [GO:0030688]	cytoplasmic translation [GO:0002181]; DNA repair [GO:0006281]; ribosomal small subunit export from nucleus [GO:0000056]; rRNA export from nucleus [GO:0006407]	damaged DNA binding [GO:0003684]; DNA-(apurinic or apyrimidinic site) lyase activity [GO:0003906]; oxidized purine nucleobase lesion DNA N-glycosylase activity [GO:0008534]; RNA binding [GO:0003723]; structural constituent of ribosome [GO:0003735]
CAF16_YEAST	2.20223	0.44402	P43569	CCR4-associated factor 16	CAF16 YFL028C	289	CCR4-NOT complex [GO:0030014]; cytoplasm [GO:0005737]; nucleus [GO:0005634]; ATP binding [GO:0005524]; ATPase activity [GO:0016887]; regulation of transcription from RNA polymerase II promoter [GO:0006357]	CCR4-NOT complex [GO:0030014]; cytoplasm [GO:0005737]; nucleus [GO:0005634]	regulation of transcription from RNA polymerase II promoter [GO:0006357]	ATPase activity [GO:0016887]; ATP binding [GO:0005524]
DPM1_YEAST	1.75481	0.445242	P14020	Dolichol-phosphate mannosyltransferase (EC 2.4.1.83) (Dolichol-phosphate mannose synthase) (DPM synthase) (Dolichyl-phosphate beta-D-mannosyltransferase) (Mannose-P-dolichol synthase) (MPD synthase)	DPM1 SED3 YPR183W P9705.3	267	endoplasmic reticulum [GO:0005783]; endoplasmic reticulum membrane [GO:0005789]; integral component of membrane [GO:0016021]; nuclear outer membrane-endoplasmic reticulum membrane network [GO:0042175]; dolichyl-phosphate beta-D-mannosyltransferase activity [GO:0004582]; dolichol-linked oligosaccharide biosynthetic process [GO:0006488]; GPI anchor biosynthetic process [GO:0006506]; protein glycosy…	endoplasmic reticulum [GO:0005783]; endoplasmic reticulum membrane [GO:0005789]; integral component of membrane [GO:0016021]; nuclear outer membrane-endoplasmic reticulum membrane network [GO:0042175]	dolichol-linked oligosaccharide biosynthetic process [GO:0006488]; GPI anchor biosynthetic process [GO:0006506]; protein glycosylation [GO:0006486]	dolichyl-phosphate beta-D-mannosyltransferase activity [GO:0004582]
RL11B_YEAST	1.93994	0.453323	Q3E757	60S ribosomal protein L11-B (L16) (Large ribosomal subunit protein uL5-B) (RP39) (YL22)	RPL11B RP39B RPL16B YGR085C	174	cytosolic large ribosomal subunit [GO:0022625]; nucleus [GO:0005634]; RNA binding [GO:0003723]; rRNA binding [GO:0019843]; structural constituent of ribosome [GO:0003735]; cytoplasmic translation [GO:0002181]; ribosomal large subunit assembly [GO:0000027]; translation [GO:0006412]	cytosolic large ribosomal subunit [GO:0022625]; nucleus [GO:0005634]	cytoplasmic translation [GO:0002181]; ribosomal large subunit assembly [GO:0000027]; translation [GO:0006412]	RNA binding [GO:0003723]; rRNA binding [GO:0019843]; structural constituent of ribosome [GO:0003735]
ADH4_YEAST	3.31531	0.474856	P10127	Alcohol dehydrogenase 4 (EC 1.1.1.1) (Alcohol dehydrogenase IV) (ADHIV)	ADH4 ZRG5 YGL256W NRC465	382	mitochondrion [GO:0005739]; alcohol dehydrogenase (NAD) activity [GO:0004022]; metal ion binding [GO:0046872]; amino acid catabolic process to alcohol via Ehrlich pathway [GO:0000947]; fermentation [GO:0006113]	mitochondrion [GO:0005739]	amino acid catabolic process to alcohol via Ehrlich pathway [GO:0000947]; fermentation [GO:0006113]	alcohol dehydrogenase (NAD) activity [GO:0004022]; metal ion binding [GO:0046872]
PMM_YEAST	2.52973	0.496017	P07283	Phosphomannomutase (PMM) (EC 5.4.2.8)	SEC53 ALG4 YFL045C	254	cytoplasmic stress granule [GO:0010494]; cytosol [GO:0005829]; phosphomannomutase activity [GO:0004615]; GDP-mannose biosynthetic process [GO:0009298]; L-ascorbic acid biosynthetic process [GO:0019853]; mannose metabolic process [GO:0006013]; protein N-linked glycosylation [GO:0006487]; protein targeting to ER [GO:0045047]; response to salt stress [GO:0009651]	cytoplasmic stress granule [GO:0010494]; cytosol [GO:0005829]	GDP-mannose biosynthetic process [GO:0009298]; L-ascorbic acid biosynthetic process [GO:0019853]; mannose metabolic process [GO:0006013]; protein N-linked glycosylation [GO:0006487]; protein targeting to ER [GO:0045047]; response to salt stress [GO:0009651]	phosphomannomutase activity [GO:0004615]
RS13_YEAST	2.35871	0.498298	P05756	40S ribosomal protein S13 (S27a) (Small ribosomal subunit protein uS15) (YS15)	RPS13 RPS13C YDR064W D4252 YD9609.18	151	cytosolic small ribosomal subunit [GO:0022627]; nucleolus [GO:0005730]; small ribosomal subunit rRNA binding [GO:0070181]; structural constituent of ribosome [GO:0003735]; cytoplasmic translation [GO:0002181]; maturation of SSU-rRNA from tricistronic rRNA transcript (SSU-rRNA, 5.8S rRNA, LSU-rRNA) [GO:0000462]; translation [GO:0006412]	cytosolic small ribosomal subunit [GO:0022627]; nucleolus [GO:0005730]	cytoplasmic translation [GO:0002181]; maturation of SSU-rRNA from tricistronic rRNA transcript (SSU-rRNA, 5.8S rRNA, LSU-rRNA) [GO:0000462]; translation [GO:0006412]	small ribosomal subunit rRNA binding [GO:0070181]; structural constituent of ribosome [GO:0003735]
RS20_YEAST	1.88209	0.515391	P38701	40S ribosomal protein S20 (Small ribosomal subunit protein uS10)	RPS20 URP2 YHL015W	121	cytosolic small ribosomal subunit [GO:0022627]; RNA binding [GO:0003723]; structural constituent of ribosome [GO:0003735]; cytoplasmic translation [GO:0002181]; maturation of SSU-rRNA from tricistronic rRNA transcript (SSU-rRNA, 5.8S rRNA, LSU-rRNA) [GO:0000462]	cytosolic small ribosomal subunit [GO:0022627]	cytoplasmic translation [GO:0002181]; maturation of SSU-rRNA from tricistronic rRNA transcript (SSU-rRNA, 5.8S rRNA, LSU-rRNA) [GO:0000462]	RNA binding [GO:0003723]; structural constituent of ribosome [GO:0003735]
TCTP_YEAST	3.43206	0.534488	P35691	Translationally-controlled tumor protein homolog (TCTP) (Microtubule and mitochondria-interacting protein 1) (Translation machinery-associated protein 19)	TMA19 MMI1 YKL056C YKL312	167	cytoplasmic stress granule [GO:0010494]; cytosol [GO:0005829]; microtubule [GO:0005874]; mitochondrion [GO:0005739]; calcium ion binding [GO:0005509]; microtubule binding [GO:0008017]; cell differentiation [GO:0030154]; cellular response to oxidative stress [GO:0034599]; cytoplasmic translation [GO:0002181]	cytoplasmic stress granule [GO:0010494]; cytosol [GO:0005829]; microtubule [GO:0005874]; mitochondrion [GO:0005739]	cell differentiation [GO:0030154]; cellular response to oxidative stress [GO:0034599]; cytoplasmic translation [GO:0002181]	calcium ion binding [GO:0005509]; microtubule binding [GO:0008017]
RPB2_YEAST	1.79241	0.539954	P08518	DNA-directed RNA polymerase II subunit RPB2 (RNA polymerase II subunit 2) (EC 2.7.7.6) (B150) (DNA-directed RNA polymerase II 140 kDa polypeptide)	RPB2 RPB150 RPO22 YOR151C	1224	cytoplasmic stress granule [GO:0010494]; cytosol [GO:0005829]; DNA-directed RNA polymerase II, core complex [GO:0005665]; DNA binding [GO:0003677]; DNA-directed 5'-3' RNA polymerase activity [GO:0003899]; metal ion binding [GO:0046872]; ribonucleoside binding [GO:0032549]; transcription from RNA polymerase II promoter [GO:0006366]; transcription, RNA-templated [GO:0001172]	cytoplasmic stress granule [GO:0010494]; cytosol [GO:0005829]; DNA-directed RNA polymerase II, core complex [GO:0005665]	transcription, RNA-templated [GO:0001172]; transcription from RNA polymerase II promoter [GO:0006366]	DNA binding [GO:0003677]; DNA-directed 5'-3' RNA polymerase activity [GO:0003899]; metal ion binding [GO:0046872]; ribonucleoside binding [GO:0032549]
SYYC_YEAST	2.39607	0.544057	P36421	Tyrosine--tRNA ligase, cytoplasmic (EC 6.1.1.1) (Tyrosyl-tRNA synthetase) (TyrRS)	TYS1 MGM104 YGR185C G7522	394	cytoplasm [GO:0005737]; cytoplasmic stress granule [GO:0010494]; nucleus [GO:0005634]; ATP binding [GO:0005524]; tyrosine-tRNA ligase activity [GO:0004831]; tyrosyl-tRNA aminoacylation [GO:0006437]	cytoplasm [GO:0005737]; cytoplasmic stress granule [GO:0010494]; nucleus [GO:0005634]	tyrosyl-tRNA aminoacylation [GO:0006437]	ATP binding [GO:0005524]; tyrosine-tRNA ligase activity [GO:0004831]
SYTC_YEAST	1.45243	0.552535	P04801	Threonine--tRNA ligase, cytoplasmic (EC 6.1.1.3) (Threonyl-tRNA synthetase) (ThrRS)	THS1 YIL078W	734	cytoplasm [GO:0005737]; ATP binding [GO:0005524]; threonine-tRNA ligase activity [GO:0004829]; threonyl-tRNA aminoacylation [GO:0006435]	cytoplasm [GO:0005737]	threonyl-tRNA aminoacylation [GO:0006435]	ATP binding [GO:0005524]; threonine-tRNA ligase activity [GO:0004829]
ALAM_YEAST	1.59645	0.55824	P52893	Probable alanine aminotransferase, mitochondrial (EC 2.6.1.2) (Glutamate pyruvate transaminase) (GPT) (Glutamic--alanine transaminase) (Glutamic--pyruvic transaminase)	ALT1 YLR089C L9449.15	592	mitochondrial matrix [GO:0005759]; mitochondrion [GO:0005739]; L-alanine:2-oxoglutarate aminotransferase activity [GO:0004021]; pyridoxal phosphate binding [GO:0030170]; alanine biosynthetic process [GO:0006523]; alanine catabolic process [GO:0006524]; chronological cell aging [GO:0001300]; L-alanine catabolic process [GO:0042853]	mitochondrial matrix [GO:0005759]; mitochondrion [GO:0005739]	alanine biosynthetic process [GO:0006523]; alanine catabolic process [GO:0006524]; chronological cell aging [GO:0001300]; L-alanine catabolic process [GO:0042853]	L-alanine:2-oxoglutarate aminotransferase activity [GO:0004021]; pyridoxal phosphate binding [GO:0030170]
STR3_YEAST	1.82896	0.561409	P53101	Cystathionine beta-lyase (CBL) (EC 4.4.1.8) (Beta-cystathionase) (Cysteine lyase) (Sulfur transfer protein 3)	STR3 YGL184C G1601	465	nucleus [GO:0005634]; peroxisome [GO:0005777]; cystathionine beta-lyase activity [GO:0004121]; cystathionine gamma-lyase activity [GO:0004123]; cystathionine gamma-synthase activity [GO:0003962]; pyridoxal phosphate binding [GO:0030170]; 'de novo' L-methionine biosynthetic process [GO:0071266]; cysteine biosynthetic process via cystathionine [GO:0019343]; methionine biosynthetic process [GO:00090…	nucleus [GO:0005634]; peroxisome [GO:0005777]	'de novo' L-methionine biosynthetic process [GO:0071266]; cysteine biosynthetic process via cystathionine [GO:0019343]; methionine biosynthetic process [GO:0009086]; transsulfuration [GO:0019346]	cystathionine beta-lyase activity [GO:0004121]; cystathionine gamma-lyase activity [GO:0004123]; cystathionine gamma-synthase activity [GO:0003962]; pyridoxal phosphate binding [GO:0030170]
THI4_YEAST	2.04943	0.579276	P32318	Thiamine thiazole synthase (Thiazole biosynthetic enzyme)	THI4 ESP35 MOL1 YGR144W G6620	326	cytosol [GO:0005829]; mitochondrion [GO:0005739]; nucleus [GO:0005634]; thylakoid [GO:0009579]; ferrous iron binding [GO:0008198]; identical protein binding [GO:0042802]; oxidoreductase activity [GO:0016491]; protein domain specific binding [GO:0019904]; protein homodimerization activity [GO:0042803]; zinc ion binding [GO:0008270]; cellular response to DNA damage stimulus [GO:0006974]; mitochondr…	cytosol [GO:0005829]; mitochondrion [GO:0005739]; nucleus [GO:0005634]; thylakoid [GO:0009579]	cellular response to DNA damage stimulus [GO:0006974]; mitochondrial genome maintenance [GO:0000002]; response to cold [GO:0009409]; thiamine biosynthetic process [GO:0009228]; thiazole biosynthetic process [GO:0052837]	ferrous iron binding [GO:0008198]; identical protein binding [GO:0042802]; oxidoreductase activity [GO:0016491]; protein domain specific binding [GO:0019904]; protein homodimerization activity [GO:0042803]; zinc ion binding [GO:0008270]
ISD11_YEAST	1.60344	0.587632	Q6Q560	Protein ISD11 (Iron-sulfur protein biogenesis, desulfurase-interacting protein 11)	ISD11 YER048W-A	94	extrinsic component of mitochondrial inner membrane [GO:0031314]; L-cysteine desulfurase complex [GO:1990221]; mitochondrial matrix [GO:0005759]; iron-sulfur cluster assembly [GO:0016226]	extrinsic component of mitochondrial inner membrane [GO:0031314]; L-cysteine desulfurase complex [GO:1990221]; mitochondrial matrix [GO:0005759]	iron-sulfur cluster assembly [GO:0016226]
HXT4_YEAST	2.03709	0.594396	P32467	Low-affinity glucose transporter HXT4 (Low-affinity glucose transporter LGT1)	HXT4 LGT1 RAG1 YHR092C	576	integral component of membrane [GO:0016021]; plasma membrane [GO:0005886]; fructose transmembrane transporter activity [GO:0005353]; glucose transmembrane transporter activity [GO:0005355]; mannose transmembrane transporter activity [GO:0015578]; pentose transmembrane transporter activity [GO:0015146]; sugar:proton symporter activity [GO:0005351]; glucose import [GO:0046323]; hexose transport [GO…	integral component of membrane [GO:0016021]; plasma membrane [GO:0005886]	glucose import [GO:0046323]; hexose transport [GO:0008645]	fructose transmembrane transporter activity [GO:0005353]; glucose transmembrane transporter activity [GO:0005355]; mannose transmembrane transporter activity [GO:0015578]; pentose transmembrane transporter activity [GO:0015146]; sugar:proton symporter activity [GO:0005351]
NUP85_YEAST	2.20997	0.599992	P46673	Nucleoporin NUP85 (Nuclear pore protein NUP85)	NUP85 RAT9 YJR042W J1624	744	nuclear membrane [GO:0031965]; nuclear pore [GO:0005643]; nuclear pore outer ring [GO:0031080]; structural constituent of nuclear pore [GO:0017056]; mRNA export from nucleus [GO:0006406]; nuclear pore distribution [GO:0031081]; positive regulation of transcription, DNA-templated [GO:0045893]; protein import into nucleus [GO:0006606]; ribosomal large subunit export from nucleus [GO:0000055]	nuclear membrane [GO:0031965]; nuclear pore [GO:0005643]; nuclear pore outer ring [GO:0031080]	mRNA export from nucleus [GO:0006406]; nuclear pore distribution [GO:0031081]; positive regulation of transcription, DNA-templated [GO:0045893]; protein import into nucleus [GO:0006606]; ribosomal large subunit export from nucleus [GO:0000055]	structural constituent of nuclear pore [GO:0017056]
MNP1_YEAST	2.14932	0.611647	P53163	54S ribosomal protein L12, mitochondrial (Mitochondrial large ribosomal subunit protein bL12m) (Mitochondrial-nucleoid protein 1)	MNP1 MRPL12 YGL068W	194	mitochondrial large ribosomal subunit [GO:0005762]; mitochondrial nucleoid [GO:0042645]; structural constituent of ribosome [GO:0003735]; mitochondrial translation [GO:0032543]	mitochondrial large ribosomal subunit [GO:0005762]; mitochondrial nucleoid [GO:0042645]	mitochondrial translation [GO:0032543]	structural constituent of ribosome [GO:0003735]
RS9B_YEAST	3.15408	0.612552	P05755	40S ribosomal protein S9-B (RP21) (S13) (Small ribosomal subunit protein uS4-B) (YP28) (YS11)	RPS9B RPS13B SUP46 YBR189W YBR1317	195	cytosolic small ribosomal subunit [GO:0022627]; nucleolus [GO:0005730]; small-subunit processome [GO:0032040]; rRNA binding [GO:0019843]; structural constituent of ribosome [GO:0003735]; maturation of SSU-rRNA from tricistronic rRNA transcript (SSU-rRNA, 5.8S rRNA, LSU-rRNA) [GO:0000462]; positive regulation of translational fidelity [GO:0045903]; translation [GO:0006412]	cytosolic small ribosomal subunit [GO:0022627]; nucleolus [GO:0005730]; small-subunit processome [GO:0032040]	maturation of SSU-rRNA from tricistronic rRNA transcript (SSU-rRNA, 5.8S rRNA, LSU-rRNA) [GO:0000462]; positive regulation of translational fidelity [GO:0045903]; translation [GO:0006412]	rRNA binding [GO:0019843]; structural constituent of ribosome [GO:0003735]
MPG1_YEAST	4.54944	0.613668	P41940	Mannose-1-phosphate guanyltransferase (EC 2.7.7.13) (ATP-mannose-1-phosphate guanylyltransferase) (GDP-mannose pyrophosphorylase) (NDP-hexose pyrophosphorylase)	PSA1 MPG1 SRB1 VIG9 YDL055C	361	cytoplasm [GO:0005737]; GTP binding [GO:0005525]; mannose-1-phosphate guanylyltransferase activity [GO:0004475]; cell cycle [GO:0007049]; cell wall mannoprotein biosynthetic process [GO:0000032]; GDP-mannose biosynthetic process [GO:0009298]; protein glycosylation [GO:0006486]	cytoplasm [GO:0005737]	cell cycle [GO:0007049]; cell wall mannoprotein biosynthetic process [GO:0000032]; GDP-mannose biosynthetic process [GO:0009298]; protein glycosylation [GO:0006486]	GTP binding [GO:0005525]; mannose-1-phosphate guanylyltransferase activity [GO:0004475]
DDR48_YEAST	2.80069	0.619167	P18899	Stress protein DDR48 (DNA damage-responsive protein 48) (DDRP 48) (Flocculent-specific protein) (YP 75)	DDR48 FSP YMR173W YM8010.03	430	ATPase activity [GO:0016887]; GTPase activity [GO:0003924]; cellular response to oxidative stress [GO:0034599]; DNA repair [GO:0006281]		cellular response to oxidative stress [GO:0034599]; DNA repair [GO:0006281]	ATPase activity [GO:0016887]; GTPase activity [GO:0003924]
PP2B2_YEAST	1.74034	0.626141	P14747	Serine/threonine-protein phosphatase 2B catalytic subunit A2 (EC 3.1.3.16) (Calcineurin A2) (Calmodulin-binding protein 2)	CMP2 CNA2 YML057W YM9958.05	604	calcineurin complex [GO:0005955]; calmodulin binding [GO:0005516]; metal ion binding [GO:0046872]; phosphoprotein phosphatase activity [GO:0004721]; adaptation of signaling pathway by response to pheromone involved in conjugation with cellular fusion [GO:0000754]; cellular ion homeostasis [GO:0006873]	calcineurin complex [GO:0005955]	adaptation of signaling pathway by response to pheromone involved in conjugation with cellular fusion [GO:0000754]; cellular ion homeostasis [GO:0006873]	calmodulin binding [GO:0005516]; metal ion binding [GO:0046872]; phosphoprotein phosphatase activity [GO:0004721]
CDC42_YEAST	1.39838	0.626461	P19073	Cell division control protein 42 (Suppressor of RHO3 protein 2)	CDC42 SRO2 YLR229C L8083.13	191	cellular bud neck [GO:0005935]; cellular bud tip [GO:0005934]; fungal-type vacuole membrane [GO:0000329]; incipient cellular bud site [GO:0000131]; mating projection tip [GO:0043332]; nuclear membrane [GO:0031965]; plasma membrane [GO:0005886]; septin ring [GO:0005940]; GTP binding [GO:0005525]; GTPase activity [GO:0003924]; budding cell apical bud growth [GO:0007118]; budding cell isotropic bud …	cellular bud neck [GO:0005935]; cellular bud tip [GO:0005934]; fungal-type vacuole membrane [GO:0000329]; incipient cellular bud site [GO:0000131]; mating projection tip [GO:0043332]; nuclear membrane [GO:0031965]; plasma membrane [GO:0005886]; septin ring [GO:0005940]	budding cell apical bud growth [GO:0007118]; budding cell isotropic bud growth [GO:0007119]; cell cycle [GO:0007049]; conjugation with cellular fusion [GO:0000747]; establishment of cell polarity [GO:0030010]; invasive growth in response to glucose limitation [GO:0001403]; pheromone-dependent signal transduction involved in conjugation with cellular fusion [GO:0000750]; positive regulation of exo…	GTPase activity [GO:0003924]; GTP binding [GO:0005525]
CDC11_YEAST	2.07272	0.626922	P32458	Cell division control protein 11	CDC11 PSL9 YJR076C J1833	415	ascospore wall [GO:0005619]; cellular bud neck septin ring [GO:0000144]; cytoplasmic microtubule [GO:0005881]; mating projection base [GO:0001400]; meiotic spindle [GO:0072687]; prospore membrane [GO:0005628]; septin complex [GO:0031105]; septin filament array [GO:0032160]; spindle microtubule [GO:0005876]; GTP binding [GO:0005525]; phosphatidylinositol-4-phosphate binding [GO:0070273]; phosphati…	ascospore wall [GO:0005619]; cellular bud neck septin ring [GO:0000144]; cytoplasmic microtubule [GO:0005881]; mating projection base [GO:0001400]; meiotic spindle [GO:0072687]; prospore membrane [GO:0005628]; septin complex [GO:0031105]; septin filament array [GO:0032160]; spindle microtubule [GO:0005876]	maintenance of cell polarity [GO:0030011]; mitotic cytokinesis [GO:0000281]; positive regulation of protein kinase activity [GO:0045860]; protein localization to bud neck [GO:0097271]	GTP binding [GO:0005525]; phosphatidylinositol-4-phosphate binding [GO:0070273]; phosphatidylinositol-5-phosphate binding [GO:0010314]; structural molecule activity [GO:0005198]
NSP1_YEAST	1.72166	0.630714	P14907	Nucleoporin NSP1 (Nuclear pore protein NSP1) (Nucleoskeletal-like protein) (p110)	NSP1 YJL041W J1207	823	nuclear membrane [GO:0031965]; nuclear pore [GO:0005643]; nuclear pore central transport channel [GO:0044613]; nuclear pore nuclear basket [GO:0044615]; nucleocytoplasmic transporter activity [GO:0005487]; phospholipid binding [GO:0005543]; structural constituent of nuclear pore [GO:0017056]; cell cycle [GO:0007049]; ncRNA export from nucleus [GO:0097064]; NLS-bearing protein import into nucleus …	nuclear membrane [GO:0031965]; nuclear pore [GO:0005643]; nuclear pore central transport channel [GO:0044613]; nuclear pore nuclear basket [GO:0044615]	cell cycle [GO:0007049]; ncRNA export from nucleus [GO:0097064]; NLS-bearing protein import into nucleus [GO:0006607]; poly(A)+ mRNA export from nucleus [GO:0016973]; protein import into nucleus [GO:0006606]; ribosomal large subunit export from nucleus [GO:0000055]; ribosomal small subunit export from nucleus [GO:0000056]; tRNA export from nucleus [GO:0006409]	nucleocytoplasmic transporter activity [GO:0005487]; phospholipid binding [GO:0005543]; structural constituent of nuclear pore [GO:0017056]
UBC1_YEAST	1.65034	0.631947	P21734	Ubiquitin-conjugating enzyme E2 1 (EC 2.3.2.23) (E2 ubiquitin-conjugating enzyme 1) (Ubiquitin carrier protein) (Ubiquitin-conjugating enzyme E2-24 kDa) (Ubiquitin-protein ligase)	UBC1 YDR177W YD9395.10	215	cytosol [GO:0005829]; nucleus [GO:0005634]; proteasome complex [GO:0000502]; ATP binding [GO:0005524]; ubiquitin protein ligase activity [GO:0061630]; ubiquitin protein ligase binding [GO:0031625]; ubiquitin-protein transferase activity [GO:0004842]; protein polyubiquitination [GO:0000209]; protein ubiquitination involved in ubiquitin-dependent protein catabolic process [GO:0042787]; ubiquitin-de…	cytosol [GO:0005829]; nucleus [GO:0005634]; proteasome complex [GO:0000502]	protein polyubiquitination [GO:0000209]; protein ubiquitination involved in ubiquitin-dependent protein catabolic process [GO:0042787]; ubiquitin-dependent ERAD pathway [GO:0030433]; vesicle organization [GO:0016050]	ATP binding [GO:0005524]; ubiquitin protein ligase activity [GO:0061630]; ubiquitin protein ligase binding [GO:0031625]; ubiquitin-protein transferase activity [GO:0004842]
RL24B_YEAST	1.46581	0.632331	P24000	60S ribosomal protein L24-B (L30) (Large ribosomal subunit protein eL24-B) (RP29) (YL21)	RPL24B RPL30B YGR148C G6635	155	cytosolic large ribosomal subunit [GO:0022625]; RNA binding [GO:0003723]; structural constituent of ribosome [GO:0003735]; assembly of large subunit precursor of preribosome [GO:1902626]; cytoplasmic translation [GO:0002181]; ribosomal large subunit assembly [GO:0000027]; translation [GO:0006412]	cytosolic large ribosomal subunit [GO:0022625]	assembly of large subunit precursor of preribosome [GO:1902626]; cytoplasmic translation [GO:0002181]; ribosomal large subunit assembly [GO:0000027]; translation [GO:0006412]	RNA binding [GO:0003723]; structural constituent of ribosome [GO:0003735]
CET1_YEAST	1.67667	0.640172	O13297	mRNA-capping enzyme subunit beta (EC 3.1.3.33) (Polynucleotide 5'-triphosphatase) (mRNA 5'-triphosphatase) (TPase)	CET1 YPL228W P1433	549	mRNA cap methyltransferase complex [GO:0031533]; polynucleotide 5'-phosphatase activity [GO:0004651]; 7-methylguanosine mRNA capping [GO:0006370]; polynucleotide dephosphorylation [GO:0098501]; positive regulation of protein localization to nucleus [GO:1900182]; positive regulation of transcription elongation from RNA polymerase II promoter [GO:0032968]	mRNA cap methyltransferase complex [GO:0031533]	7-methylguanosine mRNA capping [GO:0006370]; polynucleotide dephosphorylation [GO:0098501]; positive regulation of protein localization to nucleus [GO:1900182]; positive regulation of transcription elongation from RNA polymerase II promoter [GO:0032968]	polynucleotide 5'-phosphatase activity [GO:0004651]
PLB1_YEAST	2.33116	0.648418	P39105	Lysophospholipase 1 (EC 3.1.1.5) (Phospholipase B 1)	PLB1 YMR008C YM8270.10C	664	anchored component of membrane [GO:0031225]; endoplasmic reticulum [GO:0005783]; periplasmic space [GO:0042597]; plasma membrane [GO:0005886]; lysophospholipase activity [GO:0004622]; glycerophospholipid metabolic process [GO:0006650]; phosphatidylcholine acyl-chain remodeling [GO:0036151]; phospholipid catabolic process [GO:0009395]	anchored component of membrane [GO:0031225]; endoplasmic reticulum [GO:0005783]; periplasmic space [GO:0042597]; plasma membrane [GO:0005886]	glycerophospholipid metabolic process [GO:0006650]; phosphatidylcholine acyl-chain remodeling [GO:0036151]; phospholipid catabolic process [GO:0009395]	lysophospholipase activity [GO:0004622]
RL9A_YEAST	1.54882	0.648432	P05738	60S ribosomal protein L9-A (L8) (Large ribosomal subunit protein uL6-A) (RP24) (YL11)	RPL9A RPL8A RPL9 YGL147C	191	cytosolic large ribosomal subunit [GO:0022625]; RNA binding [GO:0003723]; rRNA binding [GO:0019843]; structural constituent of ribosome [GO:0003735]; cytoplasmic translation [GO:0002181]	cytosolic large ribosomal subunit [GO:0022625]	cytoplasmic translation [GO:0002181]	RNA binding [GO:0003723]; rRNA binding [GO:0019843]; structural constituent of ribosome [GO:0003735]
RPAB2_YEAST	1.83206	0.705348	P20435	DNA-directed RNA polymerases I, II, and III subunit RPABC2 (RNA polymerases I, II, and III subunit ABC2) (ABC23) (DNA-directed RNA polymerases I, II, and III 23 kDa polypeptide)	RPO26 RPB6 YPR187W P9677.8	155	cytoplasm [GO:0005737]; DNA-directed RNA polymerase I complex [GO:0005736]; DNA-directed RNA polymerase II, core complex [GO:0005665]; DNA-directed RNA polymerase III complex [GO:0005666]; nucleoplasm [GO:0005654]; DNA binding [GO:0003677]; RNA polymerase I activity [GO:0001054]; ribosome biogenesis [GO:0042254]; termination of RNA polymerase III transcription [GO:0006386]; transcription elongati…	cytoplasm [GO:0005737]; DNA-directed RNA polymerase I complex [GO:0005736]; DNA-directed RNA polymerase II, core complex [GO:0005665]; DNA-directed RNA polymerase III complex [GO:0005666]; nucleoplasm [GO:0005654]	ribosome biogenesis [GO:0042254]; termination of RNA polymerase III transcription [GO:0006386]; transcription, RNA-templated [GO:0001172]; transcription elongation from RNA polymerase III promoter [GO:0006385]; transcription from RNA polymerase III promoter [GO:0006383]; transcription from RNA polymerase II promoter [GO:0006366]; transcription from RNA polymerase I promoter [GO:0006360]; tRNA tra…	DNA binding [GO:0003677]; RNA polymerase I activity [GO:0001054]
YBU6_YEAST	2.85604	0.711379	P38256	Uncharacterized protein YBR096W	YBR096W YBR0824	230
ZRT1_YEAST	2.22845	0.714081	P32804	Zinc-regulated transporter 1 (High-affinity zinc transport protein ZRT1)	ZRT1 YGL255W NRC376	376	integral component of plasma membrane [GO:0005887]; high-affinity zinc uptake transmembrane transporter activity [GO:0000006]; high-affinity zinc II ion transport [GO:0006830]	integral component of plasma membrane [GO:0005887]	high-affinity zinc II ion transport [GO:0006830]	high-affinity zinc uptake transmembrane transporter activity [GO:0000006]
ARD1_YEAST	2.00661	0.724064	P07347	N-terminal acetyltransferase A complex catalytic subunit ARD1 (NatA complex subunit ARD1) (EC 2.3.1.255) (Arrest-defective protein 1)	ARD1 YHR013C	238	NatA complex [GO:0031415]; identical protein binding [GO:0042802]; peptide-glutamate-N-acetyltransferase activity [GO:1990190]; peptide-serine-N-acetyltransferase activity [GO:1990189]; histone acetylation [GO:0016573]; N-terminal peptidyl-glutamic acid acetylation [GO:0018002]; N-terminal peptidyl-serine acetylation [GO:0017198]; N-terminal protein amino acid acetylation [GO:0006474]; N-terminal…	NatA complex [GO:0031415]	histone acetylation [GO:0016573]; N-terminal peptidyl-glutamic acid acetylation [GO:0018002]; N-terminal peptidyl-serine acetylation [GO:0017198]; N-terminal protein amino acid acetylation [GO:0006474]; N-terminal protein amino acid propionylation [GO:0061606]	identical protein binding [GO:0042802]; peptide-glutamate-N-acetyltransferase activity [GO:1990190]; peptide-serine-N-acetyltransferase activity [GO:1990189]
ENT3_YEAST	2.84359	0.725711	P47160	Epsin-3	ENT3 YJR125C J2048	408	actin cortical patch [GO:0030479]; clathrin vesicle coat [GO:0030125]; cytosol [GO:0005829]; endosome [GO:0005768]; Golgi apparatus [GO:0005794]; clathrin binding [GO:0030276]; phosphatidylinositol-3,5-bisphosphate binding [GO:0080025]; phosphatidylinositol-3-phosphate binding [GO:0032266]; actin cortical patch assembly [GO:0000147]; actin cytoskeleton organization [GO:0030036]; actin filament or…	actin cortical patch [GO:0030479]; clathrin vesicle coat [GO:0030125]; cytosol [GO:0005829]; endosome [GO:0005768]; Golgi apparatus [GO:0005794]	actin cortical patch assembly [GO:0000147]; actin cytoskeleton organization [GO:0030036]; actin filament organization [GO:0007015]; early endosome to Golgi transport [GO:0034498]; Golgi to endosome transport [GO:0006895]; late endosome to vacuole transport via multivesicular body sorting pathway [GO:0032511]; multivesicular body sorting pathway [GO:0071985]; protein transport [GO:0015031]	clathrin binding [GO:0030276]; phosphatidylinositol-3,5-bisphosphate binding [GO:0080025]; phosphatidylinositol-3-phosphate binding [GO:0032266]
AB140_YEAST	1.67469	0.727596	Q08641	tRNA(Thr) (cytosine(32)-N(3))-methyltransferase (EC 2.1.1.268) (Actin-binding protein of 140 kDa) (tRNA methyltransferase of 140 kDa)	ABP140 TRM140 YOR239W YOR240W	628	actin cortical patch [GO:0030479]; actin filament [GO:0005884]; actin filament bundle [GO:0032432]; actin filament binding [GO:0051015]; protein binding, bridging [GO:0030674]; tRNA (cytosine-3-)-methyltransferase activity [GO:0052735]; actin filament bundle assembly [GO:0051017]; tRNA methylation [GO:0030488]	actin cortical patch [GO:0030479]; actin filament [GO:0005884]; actin filament bundle [GO:0032432]	actin filament bundle assembly [GO:0051017]; tRNA methylation [GO:0030488]	actin filament binding [GO:0051015]; protein binding, bridging [GO:0030674]; tRNA (cytosine-3-)-methyltransferase activity [GO:0052735]
YKT6_YEAST	1.33217	0.739729	P36015	Synaptobrevin homolog YKT6 (EC 2.3.1.-)	YKT6 YKL196C	200	endosome [GO:0005768]; fungal-type vacuole [GO:0000324]; Golgi apparatus [GO:0005794]; integral component of membrane [GO:0016021]; membrane [GO:0016020]; plasma membrane [GO:0005886]; SNARE complex [GO:0031201]; palmitoyltransferase activity [GO:0016409]; SNAP receptor activity [GO:0005484]; SNARE binding [GO:0000149]; ER to Golgi vesicle-mediated transport [GO:0006888]; exocytosis [GO:0006887];…	endosome [GO:0005768]; fungal-type vacuole [GO:0000324]; Golgi apparatus [GO:0005794]; integral component of membrane [GO:0016021]; membrane [GO:0016020]; plasma membrane [GO:0005886]; SNARE complex [GO:0031201]	ER to Golgi vesicle-mediated transport [GO:0006888]; exocytosis [GO:0006887]; intra-Golgi vesicle-mediated transport [GO:0006891]; vacuole fusion, non-autophagic [GO:0042144]; vesicle fusion [GO:0006906]	palmitoyltransferase activity [GO:0016409]; SNAP receptor activity [GO:0005484]; SNARE binding [GO:0000149]
SLY1_YEAST	2.74753	0.74569	P22213	Protein SLY1 (Suppressor of loss of YPT1 protein 1)	SLY1 YDR189W YD9346.01 YD9395.22	666	cytoplasm [GO:0005737]; endoplasmic reticulum [GO:0005783]; ER to Golgi transport vesicle [GO:0030134]; Golgi membrane [GO:0000139]; membrane [GO:0016020]; SNARE binding [GO:0000149]; syntaxin binding [GO:0019905]; ER to Golgi vesicle-mediated transport [GO:0006888]; positive regulation of SNARE complex assembly [GO:0035543]; protein transport [GO:0015031]; regulation of Ras protein signal transd…	cytoplasm [GO:0005737]; endoplasmic reticulum [GO:0005783]; ER to Golgi transport vesicle [GO:0030134]; Golgi membrane [GO:0000139]; membrane [GO:0016020]	ER to Golgi vesicle-mediated transport [GO:0006888]; positive regulation of SNARE complex assembly [GO:0035543]; protein transport [GO:0015031]; regulation of Ras protein signal transduction [GO:0046578]; retrograde vesicle-mediated transport, Golgi to ER [GO:0006890]; vesicle docking involved in exocytosis [GO:0006904]; vesicle fusion with Golgi apparatus [GO:0048280]	SNARE binding [GO:0000149]; syntaxin binding [GO:0019905]
RL34A_YEAST	2.45423	0.748056	P87262	60S ribosomal protein L34-A (Large ribosomal subunit protein eL34-A)	RPL34A YER056C-A YER056BC	121	cytosolic large ribosomal subunit [GO:0022625]; preribosome, large subunit precursor [GO:0030687]; RNA binding [GO:0003723]; structural constituent of ribosome [GO:0003735]; cytoplasmic translation [GO:0002181]; ribosome biogenesis [GO:0042254]; translation [GO:0006412]	cytosolic large ribosomal subunit [GO:0022625]; preribosome, large subunit precursor [GO:0030687]	cytoplasmic translation [GO:0002181]; ribosome biogenesis [GO:0042254]; translation [GO:0006412]	RNA binding [GO:0003723]; structural constituent of ribosome [GO:0003735]
YP12A_YEAST	2.14912	0.751273	P0CX58	Transposon Ty1-PR1 Gag polyprotein (Gag-p49) (Transposon Ty1 protein A) (TY1A) (TYA) (p58) [Cleaved into: Capsid protein (CA) (Gag-p45) (p54); Gag-p4]	TY1A-PR1 YPRCTy1-2 GAG YPR137C-A P9659.6d	440	cytoplasm [GO:0005737]; retrotransposon nucleocapsid [GO:0000943]; RNA binding [GO:0003723]; transposition, RNA-mediated [GO:0032197]	cytoplasm [GO:0005737]; retrotransposon nucleocapsid [GO:0000943]	transposition, RNA-mediated [GO:0032197]	RNA binding [GO:0003723]
PEX19_YEAST	1.74172	0.758522	Q07418	Peroxisomal membrane protein import receptor PEX19 (Peroxin-19)	PEX19 PAS12 YDL065C D2528	342	cytosol [GO:0005829]; endoplasmic reticulum [GO:0005783]; endoplasmic reticulum membrane [GO:0005789]; peroxisomal membrane [GO:0005778]; Pex17p-Pex14p docking complex [GO:1990415]; peroxisome membrane targeting sequence binding [GO:0033328]; ER-dependent peroxisome organization [GO:0032581]; peroxisome inheritance [GO:0045033]; protein exit from endoplasmic reticulum [GO:0032527]; protein import…	cytosol [GO:0005829]; endoplasmic reticulum [GO:0005783]; endoplasmic reticulum membrane [GO:0005789]; peroxisomal membrane [GO:0005778]; Pex17p-Pex14p docking complex [GO:1990415]	ER-dependent peroxisome organization [GO:0032581]; peroxisome inheritance [GO:0045033]; protein exit from endoplasmic reticulum [GO:0032527]; protein import into peroxisome membrane [GO:0045046]; protein stabilization [GO:0050821]	peroxisome membrane targeting sequence binding [GO:0033328]
KICH_YEAST	1.82978	0.760766	P20485	Choline kinase (EC 2.7.1.32)	CKI1 CKI YLR133W L3130 L9606.8	582	cytoplasm [GO:0005737]; ATP binding [GO:0005524]; choline kinase activity [GO:0004103]; ethanolamine kinase activity [GO:0004305]; phosphatidylcholine biosynthetic process [GO:0006656]; phosphatidylethanolamine biosynthetic process [GO:0006646]	cytoplasm [GO:0005737]	phosphatidylcholine biosynthetic process [GO:0006656]; phosphatidylethanolamine biosynthetic process [GO:0006646]	ATP binding [GO:0005524]; choline kinase activity [GO:0004103]; ethanolamine kinase activity [GO:0004305]
SS120_YEAST	1.65164	0.779029	P39931	Protein SSP120	SSP120 YLR250W L9672.4	234	calcium ion binding [GO:0005509]			calcium ion binding [GO:0005509]
ERO1_YEAST	1.33763	0.837582	Q03103	Endoplasmic oxidoreductin-1 (EC 1.8.4.-) (Endoplasmic reticulum oxidoreductase protein 1)	ERO1 YML130C YM4987.05C	563	endoplasmic reticulum [GO:0005783]; endoplasmic reticulum membrane [GO:0005789]; oxidoreductase activity, acting on a sulfur group of donors, disulfide as acceptor [GO:0016671]; protein disulfide isomerase activity [GO:0003756]; protein disulfide oxidoreductase activity [GO:0015035]; thiol oxidase activity [GO:0016972]; cellular protein modification process [GO:0006464]; oxidation-reduction proce…	endoplasmic reticulum [GO:0005783]; endoplasmic reticulum membrane [GO:0005789]	cellular protein modification process [GO:0006464]; oxidation-reduction process [GO:0055114]; protein folding in endoplasmic reticulum [GO:0034975]	oxidoreductase activity, acting on a sulfur group of donors, disulfide as acceptor [GO:0016671]; protein disulfide isomerase activity [GO:0003756]; protein disulfide oxidoreductase activity [GO:0015035]; thiol oxidase activity [GO:0016972]
KPR3_YEAST	1.25816	0.843333	P38689	Ribose-phosphate pyrophosphokinase 3 (EC 2.7.6.1) (Phosphoribosyl pyrophosphate synthase 3)	PRS3 PRPS3 YHL011C	320	cytoplasm [GO:0005737]; ribose phosphate diphosphokinase complex [GO:0002189]; ATP binding [GO:0005524]; kinase activity [GO:0016301]; magnesium ion binding [GO:0000287]; ribose phosphate diphosphokinase activity [GO:0004749]; 5-phosphoribose 1-diphosphate biosynthetic process [GO:0006015]; fungal-type cell wall organization [GO:0031505]; nucleoside metabolic process [GO:0009116]; nucleotide bios…	cytoplasm [GO:0005737]; ribose phosphate diphosphokinase complex [GO:0002189]	5-phosphoribose 1-diphosphate biosynthetic process [GO:0006015]; fungal-type cell wall organization [GO:0031505]; nucleoside metabolic process [GO:0009116]; nucleotide biosynthetic process [GO:0009165]; ribonucleoside monophosphate biosynthetic process [GO:0009156]	ATP binding [GO:0005524]; kinase activity [GO:0016301]; magnesium ion binding [GO:0000287]; ribose phosphate diphosphokinase activity [GO:0004749]
CAN_YEAST	1.3285	0.869664	P53615	Carbonic anhydrase (EC 4.2.1.1) (Carbonate dehydratase) (Non-classical export protein 3)	NCE103 NCE3 YNL036W N2695	221	mitochondrial intermembrane space [GO:0005758]; nucleus [GO:0005634]; carbonate dehydratase activity [GO:0004089]; zinc ion binding [GO:0008270]; carbon utilization [GO:0015976]; cellular response to carbon dioxide [GO:0071244]; cellular response to oxidative stress [GO:0034599]	mitochondrial intermembrane space [GO:0005758]; nucleus [GO:0005634]	carbon utilization [GO:0015976]; cellular response to carbon dioxide [GO:0071244]; cellular response to oxidative stress [GO:0034599]	carbonate dehydratase activity [GO:0004089]; zinc ion binding [GO:0008270]
RCC1_YEAST	1.69904	0.914954	P21827	Guanine nucleotide exchange factor SRM1 (Pheromone response pathway component SRM1) (Pre-mRNA-processing protein 20) (Regulator of chromosome condensation) (Suppressor of receptor mutations 1) (mRNA transport protein 1)	SRM1 MTR1 PRP20 YGL097W	482	nuclear chromatin [GO:0000790]; nucleus [GO:0005634]; Ran guanyl-nucleotide exchange factor activity [GO:0005087]; signal transducer activity [GO:0004871]; cell cycle [GO:0007049]; cell division [GO:0051301]; poly(A)+ mRNA export from nucleus [GO:0016973]; response to pheromone [GO:0019236]; ribosomal subunit export from nucleus [GO:0000054]; rRNA export from nucleus [GO:0006407]	nuclear chromatin [GO:0000790]; nucleus [GO:0005634]	cell cycle [GO:0007049]; cell division [GO:0051301]; poly(A)+ mRNA export from nucleus [GO:0016973]; response to pheromone [GO:0019236]; ribosomal subunit export from nucleus [GO:0000054]; rRNA export from nucleus [GO:0006407]	Ran guanyl-nucleotide exchange factor activity [GO:0005087]; signal transducer activity [GO:0004871]
YPK2_YEAST	1.47346	1.00493	P18961	Serine/threonine-protein kinase YPK2/YKR2 (EC 2.7.11.1)	YPK2 YKR2 YMR104C YM9718.03C	677	cytoplasm [GO:0005737]; nucleus [GO:0005634]; ATP binding [GO:0005524]; protein kinase activity [GO:0004672]; protein serine/threonine kinase activity [GO:0004674]; cell wall organization [GO:0071555]; eisosome assembly [GO:0070941]; intracellular signal transduction [GO:0035556]; peptidyl-serine phosphorylation [GO:0018105]; regulation of cell shape [GO:0008360]; regulation of fungal-type cell w…	cytoplasm [GO:0005737]; nucleus [GO:0005634]	cell wall organization [GO:0071555]; eisosome assembly [GO:0070941]; intracellular signal transduction [GO:0035556]; peptidyl-serine phosphorylation [GO:0018105]; regulation of cell shape [GO:0008360]; regulation of fungal-type cell wall organization [GO:0060237]	ATP binding [GO:0005524]; protein kinase activity [GO:0004672]; protein serine/threonine kinase activity [GO:0004674]
GPX3_YEAST	2.82612	1.01493	P40581	Peroxiredoxin HYR1 (EC 1.11.1.15) (Glutathione peroxidase 3) (Hydrogen peroxide resistance protein 1) (Oxidant receptor peroxidase 1) (Phospholipid hydroperoxide glutathione peroxidase 3) (PHGPx3)	HYR1 GPX3 ORP1 YIR037W	163	intracellular [GO:0005622]; mitochondrial intermembrane space [GO:0005758]; peroxisomal matrix [GO:0005782]; glutathione peroxidase activity [GO:0004602]; peroxiredoxin activity [GO:0051920]; phospholipid-hydroperoxide glutathione peroxidase activity [GO:0047066]; cellular response to oxidative stress [GO:0034599]	intracellular [GO:0005622]; mitochondrial intermembrane space [GO:0005758]; peroxisomal matrix [GO:0005782]	cellular response to oxidative stress [GO:0034599]	glutathione peroxidase activity [GO:0004602]; peroxiredoxin activity [GO:0051920]; phospholipid-hydroperoxide glutathione peroxidase activity [GO:0047066]
DUT_YEAST	3.87541	1.04111	P33317	Deoxyuridine 5'-triphosphate nucleotidohydrolase (dUTPase) (EC 3.6.1.23) (dUTP pyrophosphatase)	DUT1 YBR252W YBR1705	147	dITP diphosphatase activity [GO:0035870]; dUTP diphosphatase activity [GO:0004170]; magnesium ion binding [GO:0000287]; dITP catabolic process [GO:0035863]; dUMP biosynthetic process [GO:0006226]; dUTP catabolic process [GO:0046081]; pyrimidine deoxyribonucleoside triphosphate catabolic process [GO:0009213]		dITP catabolic process [GO:0035863]; dUMP biosynthetic process [GO:0006226]; dUTP catabolic process [GO:0046081]; pyrimidine deoxyribonucleoside triphosphate catabolic process [GO:0009213]	dITP diphosphatase activity [GO:0035870]; dUTP diphosphatase activity [GO:0004170]; magnesium ion binding [GO:0000287]
TPA1_YEAST	1.23954	1.05794	P40032	Prolyl 3,4-dihydroxylase TPA1 (EC 1.14.11.-) (Termination and polyadenylation protein 1)	TPA1 YER049W	644	cytoplasm [GO:0005737]; nucleus [GO:0005634]; ferrous iron binding [GO:0008198]; L-ascorbic acid binding [GO:0031418]; oxidative DNA demethylase activity [GO:0035516]; peptidyl-proline dioxygenase activity [GO:0031543]; poly(A) binding [GO:0008143]; DNA dealkylation involved in DNA repair [GO:0006307]; nuclear-transcribed mRNA catabolic process, deadenylation-dependent decay [GO:0000288]; oxidati…	cytoplasm [GO:0005737]; nucleus [GO:0005634]	DNA dealkylation involved in DNA repair [GO:0006307]; nuclear-transcribed mRNA catabolic process, deadenylation-dependent decay [GO:0000288]; oxidative demethylation [GO:0070989]; peptidyl-proline di-hydroxylation [GO:0018188]; regulation of translational termination [GO:0006449]; translational termination [GO:0006415]	ferrous iron binding [GO:0008198]; L-ascorbic acid binding [GO:0031418]; oxidative DNA demethylase activity [GO:0035516]; peptidyl-proline dioxygenase activity [GO:0031543]; poly(A) binding [GO:0008143]
SHE10_YEAST	1.17121	1.06535	P53075	Outer spore wall assembly protein SHE10 (Sensitivity to high expression protein 10)	SHE10 YGL228W	577	intracellular ribonucleoprotein complex [GO:0030529]; mitochondrion [GO:0005739]; ascospore wall assembly [GO:0030476]	intracellular ribonucleoprotein complex [GO:0030529]; mitochondrion [GO:0005739]	ascospore wall assembly [GO:0030476]
SDHB_YEAST	2.6137	1.14613	P21801	Succinate dehydrogenase [ubiquinone] iron-sulfur subunit, mitochondrial (EC 1.3.5.1) (Iron-sulfur subunit of complex II) (Ip)	SDH2 SDH SDHB YLL041C	266	mitochondrial membrane [GO:0031966]; mitochondrial respiratory chain complex II, succinate dehydrogenase complex (ubiquinone) [GO:0005749]; 2 iron, 2 sulfur cluster binding [GO:0051537]; 3 iron, 4 sulfur cluster binding [GO:0051538]; 4 iron, 4 sulfur cluster binding [GO:0051539]; electron carrier activity [GO:0009055]; metal ion binding [GO:0046872]; succinate dehydrogenase (ubiquinone) activity …	mitochondrial membrane [GO:0031966]; mitochondrial respiratory chain complex II, succinate dehydrogenase complex (ubiquinone) [GO:0005749]	cellular respiration [GO:0045333]; respiratory electron transport chain [GO:0022904]; tricarboxylic acid cycle [GO:0006099]	2 iron, 2 sulfur cluster binding [GO:0051537]; 3 iron, 4 sulfur cluster binding [GO:0051538]; 4 iron, 4 sulfur cluster binding [GO:0051539]; electron carrier activity [GO:0009055]; metal ion binding [GO:0046872]; succinate dehydrogenase (ubiquinone) activity [GO:0008177]
APE3_YEAST	2.15442	1.236	P37302	Aminopeptidase Y (EC 3.4.11.15)	APE3 YBR286W YBR2024	537	fungal-type vacuole [GO:0000324]; aminopeptidase activity [GO:0004177]; metal ion binding [GO:0046872]; metallopeptidase activity [GO:0008237]; protein catabolic process in the vacuole [GO:0007039]	fungal-type vacuole [GO:0000324]	protein catabolic process in the vacuole [GO:0007039]	aminopeptidase activity [GO:0004177]; metal ion binding [GO:0046872]; metallopeptidase activity [GO:0008237]
ATP5E_YEAST	2.20399	1.34136	P21306	ATP synthase subunit epsilon, mitochondrial (ATPase subunit epsilon)	ATP15 YPL271W P0345	62	mitochondrial proton-transporting ATP synthase, central stalk [GO:0005756]; proton-transporting ATP synthase activity, rotational mechanism [GO:0046933]; ATP synthesis coupled proton transport [GO:0015986]	mitochondrial proton-transporting ATP synthase, central stalk [GO:0005756]	ATP synthesis coupled proton transport [GO:0015986]	proton-transporting ATP synthase activity, rotational mechanism [GO:0046933]
COPD_YEAST	2.66356	1.53721	P43621	Coatomer subunit delta (Delta-coat protein) (Delta-COP)	RET2 YFR051C	546	COPI vesicle coat [GO:0030126]; Golgi membrane [GO:0000139]; ER to Golgi vesicle-mediated transport [GO:0006888]; Golgi inheritance [GO:0048313]; Golgi localization [GO:0051645]; protein transport [GO:0015031]; retrograde vesicle-mediated transport, Golgi to ER [GO:0006890]	COPI vesicle coat [GO:0030126]; Golgi membrane [GO:0000139]	ER to Golgi vesicle-mediated transport [GO:0006888]; Golgi inheritance [GO:0048313]; Golgi localization [GO:0051645]; protein transport [GO:0015031]; retrograde vesicle-mediated transport, Golgi to ER [GO:0006890]
