# Supplementary material for: Temporal profiling of redox-dependent heterogeneity in single cells
Source: eLife journal article supplement (doi:10.7554/elife.37623), 2018-06-05
Supplement: supp [file elife-37623-supp-v1.zip › elife_poa_e37623_Supplementary_File_6.csv]

Gene name	Oxidized_48h	Reduced_48h	log_FoldChange	Pvalue	FDR_adjusted
HXT6	7859.778266	2939.344873	1.418993973	3.41E-36	2.27E-32
YLR307C-A	1044.343147	3602.511546	-1.786407228	1.98E-32	6.60E-29
HSP26	33288.40199	19870.59288	0.744384696	1.93E-29	4.27E-26
MDH2	1592.904835	4500.915061	-1.498558261	4.94E-28	8.20E-25
ICL1	754.3653712	2681.146591	-1.829514744	1.20E-26	1.59E-23
PCK1	526.5618306	1817.009314	-1.786890962	3.32E-23	3.68E-20
HSP30	8384.98817	4038.272315	1.054070548	1.79E-22	1.70E-19
ADY2	823.3867446	2408.754959	-1.548645508	2.54E-19	2.11E-16
ADH2	1081.619675	2862.967491	-1.404317989	4.08E-18	3.01E-15
SPS100	450.8285455	1281.731797	-1.507443637	2.06E-16	1.27E-13
SUC2	494.8228099	134.8916633	1.875110818	2.09E-16	1.27E-13
MLS1	700.1360297	1865.152134	-1.413586155	4.27E-15	2.37E-12
MEP2	175.9697228	627.9661839	-1.83535965	9.20E-15	4.71E-12
RGI1	3783.017624	1944.256401	0.960319009	1.31E-14	6.23E-12
FIT2	2182.06287	979.8357377	1.155080852	1.84E-14	8.18E-12
HXT7	2257.499707	1027.474363	1.135623404	2.76E-14	1.15E-11
OLE1	400.4995092	1024.582706	-1.355164066	3.90E-13	1.53E-10
YFR052C-A	2969.890605	1552.848927	0.93549231	1.47E-12	5.41E-10
HXT5	455.4266009	1121.472317	-1.300103544	2.36E-12	7.83E-10
HXK1	3138.065543	1675.397158	0.905372354	2.32E-12	7.83E-10
POX1	97.54381771	390.1833767	-2.000029971	2.93E-12	8.84E-10
SFC1	213.7345558	644.2880756	-1.591885717	2.83E-12	8.84E-10
YRO2	1533.2559	752.1701996	1.027467448	8.01E-12	2.32E-09
PHD1	700.1187162	298.6128582	1.229323286	9.91E-12	2.75E-09
YNR034W-A	4060.731312	2338.356352	0.796244766	1.20E-11	3.20E-09
RGI2	271.1320381	721.0926709	-1.411189081	3.62E-11	9.25E-09
FBP1	245.357609	671.9248567	-1.453413888	5.56E-11	1.37E-08
OM14	868.6547166	1933.951896	-1.154697174	7.95E-11	1.89E-08
ACS1	345.740488	823.8149647	-1.252630773	9.65E-11	2.21E-08
IDP2	105.5763632	367.8029369	-1.800646125	3.24E-10	7.18E-08
NDE2	102.5869201	349.7808189	-1.769604379	1.31E-09	2.80E-07
SPG1	776.9430706	1642.324824	-1.079858699	2.09E-09	4.33E-07
YGR067C	126.5761971	405.0178626	-1.677979409	2.21E-09	4.46E-07
DDR2	3140.285763	5316.553154	-0.759595367	2.42E-09	4.73E-07
GAP1	82.29395397	303.4046765	-1.882384976	3.00E-09	5.69E-07
FMP16	923.5318632	1908.240584	-1.04700943	3.84E-09	7.08E-07
YOR338W	753.0055215	383.3548176	0.973980134	4.06E-09	7.29E-07
HSP82	4250.117413	2722.064724	0.642801327	5.32E-09	9.31E-07
SHM2	974.6679308	510.6733525	0.932509997	6.32E-09	1.08E-06
STP4	596.9034624	279.0867656	1.096783909	6.92E-09	1.15E-06
ALD4	378.5422622	812.7324503	-1.10232612	1.24E-08	2.01E-06
ATP14	990.4757899	534.7904615	0.889147978	2.58E-08	4.08E-06
SPI1	4029.579251	2630.382538	0.615356581	4.01E-08	6.20E-06
RPL41B	3402.553474	5608.279269	-0.720940356	4.20E-08	6.34E-06
ENA1	80.34563507	273.6093529	-1.767825994	5.07E-08	7.48E-06
CRC1	91.65776021	296.8449354	-1.695380562	6.65E-08	9.60E-06
ZRT1	3268.851107	2074.927095	0.655723019	6.95E-08	9.83E-06
FIT3	2799.45925	1760.386817	0.669255707	1.64E-07	2.28E-05
THI11	789.2716715	441.5149226	0.838059769	2.23E-07	3.03E-05
TSA2	297.379242	118.0043387	1.333464042	2.34E-07	3.10E-05
YPR036W-A	1671.281819	2895.048668	-0.792632574	3.25E-07	4.23E-05
CAT2	278.6784358	611.4689322	-1.133677829	4.14E-07	5.20E-05
NCE103	873.926735	1654.791151	-0.921064905	4.13E-07	5.20E-05
HSP10	2471.452176	1548.896625	0.67411813	4.38E-07	5.39E-05
SIP18	4059.622008	2793.556114	0.539242604	7.25E-07	8.76E-05
STL1	0	67.51183762	#NAME?	1.08E-06	0.000127649
PHM7	119.2840121	321.0355525	-1.428332387	1.15E-06	0.000133587
ECI1	114.4144304	306.0641849	-1.419565211	2.23E-06	0.000251128
YIL169C	176.3615325	54.7777856	1.686873067	2.19E-06	0.000251128
DUR1	50.72996347	198.3768239	-1.967333461	2.41E-06	0.000267164
YAT2	201.824844	457.3732332	-1.180268161	2.68E-06	0.000287613
CPA1	1802.802464	1118.406411	0.688796791	2.65E-06	0.000287613
ATP18	2189.941366	1401.772649	0.643639863	3.46E-06	0.000364775
FMP43	505.0399251	927.7128935	-0.87728095	3.51E-06	0.000364875
ATO3	105.6713497	284.4854051	-1.428770363	4.58E-06	0.00046802
SHH4	30.57826161	137.1343953	-2.165012169	5.31E-06	0.000524934
IDP3	123.586754	313.2730775	-1.341896667	5.31E-06	0.000524934
THI12	722.0771995	434.3328092	0.733352151	5.37E-06	0.000524934
YJL133C-A	909.768819	557.0335485	0.70773577	6.16E-06	0.000593327
YNR071C	122.5240005	32.27027926	1.92478641	8.12E-06	0.000771135
YDL012C	191.3839897	423.7519589	-1.146749892	8.24E-06	0.000771135
GUT2	172.1358152	394.9386007	-1.198081081	8.74E-06	0.000807223
ENA2	77.64417068	227.3173244	-1.54975812	9.11E-06	0.00082913
YER163C	149.4150688	353.6808246	-1.243122349	1.05E-05	0.000946517
COX17	679.0403481	411.5351221	0.72248174	1.13E-05	0.000998488
DUG3	302.0378697	141.9947764	1.088891589	1.25E-05	0.001092677
CPR6	1732.438615	1113.492791	0.637712017	1.29E-05	0.00111235
YKL107W	0	91.26997593	#NAME?	1.33E-05	0.00113229
YDR034W-B	169.2197293	384.848035	-1.185391099	1.48E-05	0.001245306
YIR016W	92.31074219	245.3812261	-1.410454425	1.72E-05	0.001426172
MDH1	980.6952526	619.1735259	0.663461107	1.75E-05	0.001439058
PDC5	434.2675408	229.5810239	0.919580723	1.81E-05	0.001464409
YLR294C	552.5569797	319.4683559	0.790450207	1.99E-05	0.001589886
YGL188C	551.9219596	319.3047707	0.78953018	2.07E-05	0.001630265
SSA3	1983.629632	1307.505011	0.601326207	2.08E-05	0.001630265
THI13	651.3602105	397.5766706	0.712222489	2.25E-05	0.001736278
AHP1	2981.587205	2101.434423	0.504706096	2.37E-05	0.001811946
ATP4	1281.434118	841.8311196	0.60615656	2.45E-05	0.001852026
ROD1	0	52.26576459	#NAME?	2.88E-05	0.002129772
YLL056C	358.5409422	182.1386508	0.977100768	2.88E-05	0.002129772
PRP46	115.3821974	281.7254579	-1.287869294	3.03E-05	0.002214227
FTR1	189.8545599	405.4084822	-1.094481624	3.16E-05	0.002281361
GRX1	1442.860572	951.6716066	0.60039616	3.72E-05	0.002657642
HPF1	211.7630981	91.00602762	1.218417199	3.99E-05	0.002823375
CTA1	112.3890869	272.5325166	-1.277926417	4.23E-05	0.002957191
HXT4	524.1699743	308.5815466	0.764382925	5.42E-05	0.003751522
ATP16	676.1093194	430.7970393	0.650248198	5.72E-05	0.003916813
YDR183C-A	50.19143947	0	Inf	7.00E-05	0.004701749
ATC1	50.19143947	0	Inf	7.00E-05	0.004701749
CDA1	44.16778512	154.3962416	-1.805571241	7.25E-05	0.004819186
NCA3	465.9819132	264.8172416	0.815276903	7.99E-05	0.005205652
QCR7	2365.755905	1660.284039	0.510871149	7.98E-05	0.005205652
PHO89	191.3413794	394.8752272	-1.045247958	8.15E-05	0.005261953
POT1	87.50540013	223.2537335	-1.351240346	9.05E-05	0.005786454
FSH1	394.0749277	219.6916554	0.842989891	9.41E-05	0.005955572
YHR162W	739.9426586	484.4031932	0.611205099	0.000102564	0.006371453
YBR072C-A	1168.457798	787.0529387	0.570073046	0.000101739	0.006371453
COX7	2364.396329	1671.814584	0.500057035	0.000105414	0.00648783
SSC1	1024.138481	683.4769153	0.58344629	0.000108101	0.00659218
YBR085C-A	1667.80407	1131.51993	0.559687818	0.000109895	0.006640649
HRK1	342.5738568	183.1414323	0.903456847	0.000128767	0.007642087
ATP19	561.4413246	348.1186756	0.689556044	0.000128604	0.007642087
URA10	683.0386589	449.2093058	0.60457942	0.000144228	0.008409492
COX8	904.9044142	603.774549	0.583755463	0.000143188	0.008409492
QCR8	1612.676651	1105.423962	0.54485741	0.000168647	0.009747776
FAS1	660.5663	1079.877009	-0.709091733	0.000175848	0.010076367
LSP1	680.4248462	1109.344859	-0.705200194	0.000193846	0.011012752
RAD9	66.29094475	0	Inf	0.000198282	0.011169305
DAL3	119.6633099	266.7648474	-1.156587696	0.000211997	0.011742884
TMA10	7619.411425	5935.974287	0.360194716	0.00021189	0.011742884
VPS21	275.234453	145.7468236	0.917196632	0.000241712	0.013278161
YMR175W-A	1725.344599	1203.06371	0.520171493	0.000256167	0.013956926
UBC4	1738.105462	1213.676209	0.518132039	0.000263849	0.014258549
PNS1	51.13606757	155.5835757	-1.605276645	0.000273888	0.01468174
YGR035C	0	82.00305535	#NAME?	0.000281017	0.014943382
REE1	347.2969973	194.3131574	0.837786345	0.000288227	0.015205117
YLR312C	212.7488269	405.9203567	-0.932045515	0.000307246	0.01608084
YPR010C-A	830.0761659	567.6096805	0.548344526	0.000312078	0.016206115
YKL187C	83.55336704	205.1473502	-1.295890648	0.000317527	0.016361236
YLR271W	440.7115938	261.5400792	0.752802804	0.000322183	0.016473474
YGP1	1988.261727	1415.557078	0.490137757	0.000342767	0.017392135
SUT2	91.76704125	28.06439033	1.709235375	0.000356327	0.017943235
AIM18	241.3197069	125.7196894	0.940735123	0.00036891	0.01843719
GRE1	1438.229399	2205.680322	-0.616929905	0.000414156	0.020543987
ATP15	1515.092969	1063.933886	0.50999782	0.000417707	0.020566672
TDA3	92.08182622	28.61325441	1.68623285	0.000420966	0.020574732
ICL2	144.6240213	296.3910937	-1.0351949	0.000441077	0.021400277
SOL3	112.904472	39.2521375	1.524259506	0.000455906	0.021890248
CIT2	1203.661195	1868.751353	-0.634645263	0.000457762	0.021890248
COX4	600.8037677	396.9592437	0.597902968	0.00046196	0.021933218
COX6	395.4487987	237.3650131	0.73638361	0.000486724	0.022783464
PEX11	147.9462112	299.5152766	-1.017556838	0.000496845	0.023094595
JEN1	277.7876935	497.469832	-0.840626352	0.000505324	0.023325612
COX26	241.4198704	444.1009985	-0.879343391	0.000512746	0.023504988
RAD51	25.48127344	94.86370297	-1.896418806	0.000558172	0.025412099
HXT2	102.8106591	35.84303883	1.520224986	0.000580111	0.026231269
PER33	266.2983802	146.9818288	0.857405846	0.000600236	0.026776965
SPG5	371.1806606	622.2130481	-0.745287105	0.000598311	0.026776965
YKR075C	175.590425	80.04523913	1.133326674	0.000687891	0.030344276
UTH1	1584.472284	1132.021367	0.485101234	0.000689331	0.030344276
ISW2	0	45.33157738	#NAME?	0.000725017	0.031705169
SRN2	114.9118536	44.23384921	1.37730493	0.000745809	0.0323406
HIP1	123.8747327	51.72224122	1.260025248	0.000749278	0.0323406
HSP104	2321.990557	1730.709123	0.423998831	0.000767151	0.032898383
FAA2	110.3817052	234.6051416	-1.087733553	0.000782034	0.03332166
YML020W	40.07448776	0	Inf	0.00079399	0.033615598
NSE4	0	22.79242213	#NAME?	0.000833327	0.035057752
YOL047C	0	22.50216564	#NAME?	0.000858735	0.035899449
ATP5	345.8729079	205.611949	0.750317904	0.000938809	0.039001638
YPR022C	82.40323502	27.00365177	1.609546457	0.000956856	0.039504478
ARA2	0	30.57107063	#NAME?	0.000974989	0.040004655
YBR298C-A	153.9324322	69.79155923	1.141172758	0.001005911	0.041020181
YFR016C	198.7352374	102.1991912	0.959463918	0.001030787	0.041778315
ARG3	75.8462336	184.1388731	-1.279644777	0.001038434	0.041833166
TRE2	0	44.29714701	#NAME?	0.001121398	0.043846647
CST9	79.03082672	25.07214374	1.656330144	0.001117132	0.043846647
PAI3	596.0681154	924.2667295	-0.632832049	0.001113288	0.043846647
TRP3	58.99358284	155.6892039	-1.40003897	0.001187992	0.046178834
COX5A	754.7541618	537.3867478	0.490046063	0.001217247	0.04704095
YJL163C	37.37302337	116.2788219	-1.637519176	0.001233472	0.047392416
PEX2	67.29463556	169.473313	-1.332494701	0.001300067	0.049664066
HAP4	531.6430148	356.8367321	0.575193705	0.001330351	0.050530549
YGR182C	993.6850314	716.5069195	0.471807996	0.001345765	0.050825563
FET4	234.0814077	130.8016885	0.839629186	0.001373597	0.051583622
GCY1	248.8301808	141.2876678	0.816525935	0.001401058	0.052319294
ECM11	28.58884192	0	Inf	0.001410971	0.052395098
SLG1	74.9016055	23.30963731	1.684070086	0.00147852	0.054429001
SGT2	903.015158	649.5600438	0.475287314	0.00148212	0.054429001
ESS1	41.83132404	120.780308	-1.529729689	0.001508153	0.054779742
TOM6	365.7314541	227.7921336	0.683066782	0.001507078	0.054779742
OYE2	339.3481629	205.9918115	0.720179213	0.001525252	0.05509974
RPC11	0	75.34836754	#NAME?	0.001544475	0.055194209
THI4	720.1200362	514.2091981	0.485881991	0.001540545	0.055194209
VMS1	35.59822515	0	Inf	0.001642405	0.056390809
ARO9	42.81705293	121.001926	-1.498772607	0.001645828	0.056390809
IRC23	45.28593391	123.1866252	-1.443710711	0.001617001	0.056390809
MHR1	147.0965697	66.48274797	1.145711683	0.001619503	0.056390809
RLP7	171.4971277	82.04004497	1.063784226	0.001635927	0.056390809
IES5	185.661099	95.25966326	0.96273421	0.001615736	0.056390809
TMA17	346.8586368	568.5174396	-0.712856797	0.001637293	0.056390809
ECM15	806.2567422	1216.082678	-0.592930091	0.001605398	0.056390809
UBC5	404.6339073	642.1086414	-0.666200195	0.001671349	0.056971565
YDR338C	80.84305828	28.09603923	1.524757136	0.001704263	0.057797122
RMA1	21.19649345	0	Inf	0.00183391	0.061878155
PDH1	53.81957003	141.1503151	-1.391029579	0.001874132	0.062915929
SNA2	165.1675327	306.7976774	-0.893357439	0.001895386	0.063309706
ACO1	415.6954871	651.1960303	-0.647564819	0.001975773	0.065664823
CIT3	0	20.8292652	#NAME?	0.001991699	0.065864807
RRP46	174.3721128	87.31201316	0.997917258	0.002045833	0.067320055
CAF130	0	71.26914988	#NAME?	0.002064152	0.067588261
RTC2	46.67776689	122.6378368	-1.393596707	0.00214557	0.069909834
NOG2	39.07079695	0	Inf	0.00220187	0.071047712
ATP20	410.6612291	264.6272725	0.633986994	0.002197479	0.071047712
ZWF1	475.1685313	317.3786034	0.582234425	0.002219838	0.071281468
PSK2	64.72559108	0	Inf	0.002316467	0.07402671
SHC1	0	41.44225313	#NAME?	0.002331596	0.074153666
GLN3	38.93837704	113.5028525	-1.543463897	0.002373724	0.074777917
PMP3	511.6882457	777.7863378	-0.604108801	0.002367723	0.074777917
DCI1	0	44.4924568	#NAME?	0.002389726	0.074926917
MCM1	161.2888568	77.34858975	1.060199875	0.002403818	0.075014935
RPT4	359.2441425	228.4730097	0.652940889	0.002476827	0.076592308
QCR10	486.5217572	329.4687689	0.562362608	0.00247741	0.076592308
PET20	221.2270678	126.4058305	0.807464905	0.002550974	0.078139745
EMI5	492.4078147	335.796135	0.552268033	0.002684657	0.08185741
TIR4	38.31765147	0	Inf	0.002711524	0.081924993
HYP2	859.8011186	1267.298385	-0.559681354	0.002705174	0.081924993
PRP6	160.285166	77.59651592	1.046577132	0.002724803	0.081953678
SCW4	658.2514683	478.7936928	0.459234687	0.002791783	0.08359001
BPH1	148.6993567	71.97633414	1.046803875	0.002823326	0.083779668
LEU1	606.2225004	433.0028573	0.485470855	0.002815029	0.083779668
PSP2	0	50.43454397	#NAME?	0.00292902	0.084847775
EMP47	37.54654406	107.1384969	-1.512724934	0.002937153	0.084847775
SCS7	201.5779661	112.3841569	0.842899281	0.002948674	0.084847775
GRE3	379.5228141	246.9431577	0.620007618	0.00288658	0.084847775
ACB1	598.4277153	896.6726741	-0.583404439	0.002915065	0.084847775
QCR6	765.4881717	563.0238534	0.44318404	0.002920498	0.084847775
THI73	192.5919481	344.4830893	-0.838885774	0.002982389	0.085448018
SIT1	322.4955121	521.3599066	-0.693000558	0.003088199	0.088099832
GPT2	108.8754143	216.7363984	-0.99326325	0.003179624	0.090320339
RRT8	106.8126374	213.189947	-0.997057062	0.00321512	0.090578518
GDH1	143.3143899	267.2712298	-0.899121074	0.003227114	0.090578518
TDH1	3349.594548	2696.079405	0.313123488	0.003264083	0.091161175
MEP1	54.08807728	133.7413187	-1.306062729	0.003339009	0.092863557
STF1	2060.282897	1584.285898	0.379009742	0.003382953	0.0936937
APE3	525.2725922	785.7441226	-0.580993266	0.003495952	0.096023122
OCA2	199.8533862	112.801009	0.825162045	0.003565638	0.09753414
CWC23	81.52284657	31.114594	1.389613006	0.003648759	0.099398786
ATG19	211.9186568	122.352921	0.79246206	0.003665886	0.099457729
YAT1	62.43023079	149.6784782	-1.261550091	0.003709901	0.100242744
MATALPHA2	356.3137621	231.2276162	0.623834493	0.003743175	0.100326136
PFA5	0	43.91194382	#NAME?	0.003771449	0.100677999
MTH1	333.0955926	212.4087836	0.649092839	0.003844093	0.102206736
ICY1	1011.840627	758.9519541	0.414901609	0.004005034	0.106061603
YRF1-8	52.70142124	128.4586691	-1.285390481	0.004060741	0.10711011
FMP48	60.73245721	145.7468236	-1.262924796	0.004106853	0.107852204
ARA1	181.5909405	321.2099705	-0.822824446	0.004128545	0.107852204
MDH3	725.5655753	1067.744513	-0.557388571	0.004137553	0.107852204
LSC2	241.187287	403.0702568	-0.740877463	0.004212181	0.109368611
PDR10	60.51783573	145.2349491	-1.262956364	0.004296875	0.111133562
ARC35	377.5102556	251.1334955	0.588061374	0.00439161	0.113143528
NIP7	77.7354898	29.76893966	1.38476557	0.004454837	0.11432936
TAF14	54.05215344	129.9732493	-1.265790722	0.00449071	0.114682366
TRX3	258.3623308	159.1933249	0.698615897	0.004503099	0.114682366
SAM1	233.9721267	140.9394542	0.731261138	0.004554418	0.115546622
TAD1	40.80967131	0	Inf	0.004658969	0.117749678
HCH1	349.0626779	229.0691494	0.607702938	0.004902851	0.12344413
RLM1	79.1452847	30.88763531	1.357473975	0.004941318	0.123943162
TIR2	50.38292209	0	Inf	0.004983809	0.124441672
QCR2	373.1521184	249.2599446	0.582112812	0.004998635	0.124441672
LAG1	41.63984143	111.7139623	-1.423773029	0.005025068	0.124632926
SPS19	80.78766301	174.9142828	-1.114441196	0.005075487	0.12541548
DNL4	0	45.64814206	#NAME?	0.005200714	0.127561417
SRT1	0	49.56911521	#NAME?	0.005196937	0.127561417
SKY1	121.232331	59.46924082	1.027558934	0.005253441	0.127948529
HSP60	481.4390635	337.2104278	0.513704055	0.005254995	0.127948529
MUP3	0	57.03119903	#NAME?	0.005283992	0.128185015
QDR1	0	34.52369268	#NAME?	0.00536264	0.129619882
YGL036W	29.57457081	87.34366206	-1.562345788	0.005399999	0.130049965
AUS1	82.68209614	33.36800742	1.309109426	0.005469298	0.131243401
TPO4	83.81820686	176.7137789	-1.076078972	0.005540987	0.132485399
YDR387C	39.86504321	0	Inf	0.005567875	0.132651119
THI5	569.2346002	413.4242241	0.461400433	0.005694855	0.135191783
MIH1	40.46262993	105.9195138	-1.388306407	0.00582505	0.137301807
UPS2	336.7237231	220.5833924	0.610241192	0.005810243	0.137301807
GPD1	198.5385779	340.5932183	-0.778630346	0.00590921	0.138304633
STP1	401.7948461	272.0207178	0.562742523	0.005905759	0.138304633
SRB4	22.02666357	72.30358025	-1.714816104	0.005998559	0.139903244
COR1	774.8355255	586.8030349	0.401013769	0.006020867	0.139932524
BLM10	136.7701734	248.5951663	-0.8620446	0.006097875	0.141228496
GUT1	76.42585839	167.3519116	-1.130752274	0.006169293	0.142386424
BUD9	34.80397889	0	Inf	0.006199024	0.142577549
SDH1	157.3639032	81.71813957	0.945376383	0.006238233	0.142984611
ERG25	245.700983	401.429552	-0.708243198	0.006309544	0.144122118
YPL062W	0	32.88244114	#NAME?	0.006591816	0.149161524
YMR103C	124.4312186	228.8528722	-0.879071909	0.006615829	0.149161524
YKL068W-A	296.0875725	190.8514423	0.633573849	0.006619926	0.149161524
UBP11	32.85565998	90.33590865	-1.459157653	0.006817064	0.15308454
AAD10	294.4220553	190.2392804	0.630070585	0.006840941	0.153103473
SPC72	0	25.94291322	#NAME?	0.006893549	0.153763151
YAL018C	26.81404371	0	Inf	0.006952813	0.154566376
PCD1	27.64421382	82.35126894	-1.574813337	0.007174105	0.158426162
YRF1-7	43.93520172	112.0359433	-1.350512428	0.007157492	0.158426162
YGR064W	55.59436825	0	Inf	0.007264425	0.159889522
CSR2	42.41094883	108.906344	-1.360579332	0.007323687	0.160133377
VMA13	229.0988775	375.5493898	-0.713032264	0.007321255	0.160133377
REG2	154.0468902	270.0789994	-0.810011906	0.007400726	0.161287289
TEL16R-YP	0	25.58935892	#NAME?	0.007720953	0.16662719
PUT4	61.67708531	140.7757933	-1.190592787	0.007702892	0.16662719
GAT1	73.08570651	156.8449648	-1.101678026	0.007824884	0.168296922
YSA1	393.7099243	270.300466	0.54256908	0.007848961	0.168296922
VPS8	0	40.37617386	#NAME?	0.007889181	0.168615396
RKM3	51.90717498	118.6534902	-1.192748661	0.007965787	0.169707007
HSL7	85.80762655	36.6505105	1.227272586	0.008152451	0.172029662
ECM1	0	54.55082691	#NAME?	0.008886989	0.18634642
CAN1	143.0818065	252.0675628	-0.816970239	0.008981822	0.187742675
ACH1	879.0508026	676.5267059	0.377799659	0.009103541	0.189690407
RNR4	523.0789049	753.917626	-0.527378312	0.009205698	0.191219603
YNR073C	67.64167695	25.87961541	1.386096249	0.009322238	0.193037126
COX11	83.3156067	35.84303883	1.216893811	0.009371386	0.193452187
LEU4	316.2392744	489.179309	-0.629346833	0.00947701	0.195026899
YNL092W	0	39.542394	#NAME?	0.009584662	0.196633488
ACF4	47.25739168	0	Inf	0.009715587	0.198706168
FAL1	21.21445538	0	Inf	0.009769814	0.199202306
PMP2	1073.689075	836.5801189	0.360000652	0.009877603	0.200784177
YLR297W	21.42907686	66.74135556	-1.639011287	0.010274157	0.208208289
RCF1	188.9151087	113.8564068	0.730522612	0.010313697	0.208374306
GLC3	280.1025252	441.435998	-0.656249293	0.01037749	0.209027808
COX9	721.1057651	555.5564289	0.37627742	0.010430224	0.209455281
SYF2	53.83753196	0	Inf	0.010638157	0.212347829
COQ5	252.2616518	164.3016322	0.618574096	0.010695359	0.212850453
LIP1	251.5496071	164.1063224	0.616212114	0.010827384	0.213559706
CST6	83.64468617	170.4073803	-1.026642024	0.010938247	0.215013734
MAM33	85.78966463	37.83784466	1.18097394	0.010990523	0.215013734
ACC1	460.5536876	664.3469344	-0.528567497	0.010998145	0.215013734
ERG3	101.8480691	191.2527433	-0.909061812	0.01110232	0.215781065
SVS1	106.689335	52.52437218	1.02235705	0.011093398	0.215781065
CRP1	226.3794512	363.8605253	-0.684642535	0.0113048	0.219075821
SRB5	106.8485612	53.39514166	1.000787097	0.011427691	0.220563054
YPR127W	199.2917233	122.8911037	0.697501316	0.011447909	0.220563054
SNZ2	54.97881961	0	Inf	0.011856495	0.227774915
AST2	56.94510044	0	Inf	0.012074343	0.231291514
RPS26B	49.97681799	113.9566943	-1.189154723	0.012189613	0.232828615
RPN14	117.4449742	62.07086782	0.919996757	0.012272664	0.233075416
PBI2	1301.247896	1803.930673	-0.471248065	0.012237875	0.233075416
ECM7	0	41.50021022	#NAME?	0.012373923	0.234328958
DOM34	37.95264816	94.3834774	-1.314333773	0.012695182	0.238662801
PHS1	43.58816033	104.6108491	-1.26302426	0.012721359	0.238662801
ZPR1	155.6481677	263.7194377	-0.760715317	0.012746396	0.238662801
CYC7	395.6956766	279.1978102	0.503103676	0.012707074	0.238662801
YOR041C	0	28.38629572	#NAME?	0.012836663	0.239677806
PUT2	41.25169926	99.7187434	-1.273411154	0.012948688	0.239749108
YDR541C	76.03771622	33.43130522	1.18551552	0.012908401	0.239749108
RPN6	353.4530715	246.7006479	0.518757175	0.012912954	0.239749108
YPL225W	636.8403533	492.4355039	0.370996973	0.013099191	0.241669539
UBI4	856.1528681	1191.934147	-0.477364209	0.013125125	0.241669539
YNL035C	0	63.45885248	#NAME?	0.013352456	0.245049005
YIL100C-A	45.90665949	109.1649516	-1.249734381	0.013382396	0.245049005
MRF1	24.30406194	0	Inf	0.013549742	0.245977941
MSC1	846.1397473	1177.922927	-0.477277284	0.0134837	0.245977941
ERG13	59.68766561	127.5298668	-1.095330422	0.013863166	0.246218083
CCT8	388.1657313	274.8915581	0.497810155	0.013859565	0.246218083
SAS5	137.6916627	74.67832424	0.882679747	0.013940382	0.24644074
EST1	0	48.76698424	#NAME?	0.014100251	0.247190547
YDJ1	309.8506167	210.5936608	0.55711083	0.014131549	0.247190547
PET112	0	39.80100159	#NAME?	0.014385562	0.249350775
SEC61	202.1898473	127.6828463	0.663145838	0.01429426	0.249350775
BIO5	208.9292138	337.7223779	-0.692823545	0.014401762	0.249350775
CRS5	1728.845487	1384.721984	0.320212586	0.014547288	0.251157986
PAN1	106.580054	55.0680421	0.952650248	0.01467102	0.252637997
ATP25	0	58.70409947	#NAME?	0.015069086	0.257491562
ARI1	52.13975838	0	Inf	0.015036066	0.257491562
MMS2	198.1967134	124.9175584	0.665956763	0.015026282	0.257491562
LGE1	88.72371242	42.33933079	1.067321266	0.015123932	0.257766089
RTN2	170.2788154	280.4591992	-0.719891946	0.015447716	0.262611179
MAK31	42.04594552	98.84797392	-1.233244707	0.015543844	0.263571259
ERG2	173.6189673	284.5700658	-0.712859345	0.015633753	0.26442126
VMA7	185.7021998	115.2497322	0.688227507	0.015726109	0.26463658
HSP31	472.0235294	349.2952526	0.434411742	0.015714521	0.26463658
ARR1	26.46700232	71.84966286	-1.440786584	0.015811723	0.264736835
AAT2	404.1650731	588.0481748	-0.540989697	0.015785296	0.264736835
MST1	43.9172398	0	Inf	0.015907374	0.265003291
OXR1	293.5775907	200.2342771	0.552052886	0.015885429	0.265003291
QCR9	1391.232531	1110.801558	0.324762466	0.016266775	0.270313137
UBP7	21.60259755	64.64618664	-1.581360474	0.016442558	0.271874833
PHO5	139.9331372	78.3143816	0.837388471	0.016421805	0.271874833
COX13	946.8517058	750.503111	0.335280439	0.016635611	0.274384375
FRQ1	194.7974988	123.4769574	0.657733315	0.016822758	0.276784335
TRX2	1431.453733	1144.079488	0.323293749	0.016890898	0.277219258
URA6	69.39851323	29.73729076	1.22263154	0.016935382	0.277264733
MGA2	80.59618039	160.3860755	-0.992765521	0.017111587	0.279461218
YGR066C	176.771304	108.9433336	0.698306176	0.017249102	0.281016623
YML057C-A	23.14481236	0	Inf	0.017338199	0.281777524
DED1	410.5537307	296.1115186	0.471430434	0.017381017	0.281784436
PDX3	339.5755693	239.5867776	0.503184378	0.017549534	0.283824222
SHE9	37.14043997	89.11684992	-1.262707332	0.017729305	0.284728763
YGR174W-A	38.93837704	93.10119654	-1.257606956	0.01765432	0.284728763
SRB6	42.04594552	97.69228867	-1.216277999	0.017733971	0.284728763
BNA6	148.42934	84.86863066	0.806472992	0.017873165	0.286272111
SUS1	127.7534086	69.46965384	0.87890697	0.018087755	0.288319679
YNL200C	280.0434625	192.2287455	0.542826659	0.018061226	0.288319679
PRR2	0	50.31328908	#NAME?	0.018256089	0.289969747
LST7	148.5617599	85.44380293	0.798015046	0.01827852	0.289969747
PCT1	59.74672832	123.5349145	-1.047987226	0.018628768	0.294822437
YER121W	55.07380617	114.996541	-1.062152245	0.018695089	0.295169261
ASM4	92.40572875	46.16535724	1.001171645	0.018791025	0.295980905
HOG1	83.44802661	39.6056918	1.075170156	0.019201137	0.301014046
YSY6	320.1949749	477.5323038	-0.576647664	0.019180902	0.301014046
PRX1	424.5171019	607.1413174	-0.516209681	0.019293895	0.301756518
ATG1	0	52.81462867	#NAME?	0.019422104	0.301990148
YPL068C	31.52288971	0	Inf	0.019377755	0.301990148
RPN12	319.1322214	222.9741585	0.517277759	0.019445131	0.301990148
NPR2	0	26.42313879	#NAME?	0.01972054	0.305553454
CDC23	0	47.66925608	#NAME?	0.019808497	0.305615966
ATE1	0	51.52693143	#NAME?	0.019816531	0.305615966
YIL029C	27.06458903	71.0791808	-1.393020573	0.020480548	0.309944272
YGR146C-A	31.11678562	78.95285168	-1.343298339	0.020393888	0.309944272
RKI1	32.5086186	81.71813957	-1.329834107	0.020429366	0.309944272
YPR204W	48.02849909	107.6294039	-1.16410964	0.020516847	0.309944272
WBP1	52.89290386	112.7377112	-1.091824096	0.020316796	0.309944272
AAD16	78.76231947	36.97241589	1.091056281	0.020323359	0.309944272
EXO84	84.76283496	40.79310163	1.055106637	0.020471534	0.309944272
IZH3	171.8852699	105.8932056	0.698835889	0.020296727	0.309944272
IGO1	414.5362376	302.496766	0.454578505	0.0203548	0.309944272
ATG26	26.87310642	70.9842341	-1.401335531	0.020659159	0.311113591
PGM2	127.6620895	216.6623435	-0.763118265	0.02068786	0.311113591
CTK3	57.73934671	22.79242213	1.341000538	0.02081028	0.312248154
SEN1	35.61618708	85.12189754	-1.256997236	0.021100619	0.315891468
SNT2	25.82831482	0	Inf	0.021632345	0.321990642
TAF7	67.02095137	29.22541629	1.197388591	0.021697957	0.321990642
YRB1	277.1273766	192.6616954	0.524479471	0.021798674	0.321990642
RSM26	29.76605342	76.15583921	-1.355286707	0.022239059	0.327042096
GRX5	201.5189034	132.0630776	0.609688005	0.022213459	0.327042096
YGR139W	34.03287148	0	Inf	0.022402134	0.328712988
MCH5	185.551818	119.0071201	0.640774244	0.022558273	0.329549102
RNR2	266.5863589	403.8042203	-0.599053029	0.022515859	0.329549102
AIM13	69.69015935	31.75840479	1.133816505	0.022694242	0.330808394
VPS52	26.42590154	0	Inf	0.022867084	0.331896273
GOT1	35.01860037	83.49132742	-1.253504924	0.022905919	0.331896273
KRE1	162.2103461	98.68431304	0.716973165	0.022963222	0.331896273
NHP6A	190.8993515	302.8293529	-0.665692849	0.0229686	0.331896273
ENA5	0	48.99394294	#NAME?	0.023108059	0.333187131
YMD8	39.88300514	91.55489171	-1.198862851	0.023167795	0.333325396
YMR1	0	39.47375548	#NAME?	0.023294394	0.33442298
RVS161	368.1838827	269.0971097	0.452299578	0.023398011	0.335186596
PUT3	22.54722565	63.49050138	-1.493590845	0.023464789	0.335420335
BET4	26.64052302	69.56460054	-1.38473094	0.023739833	0.337586292
YRF1-3	49.61181468	108.2469065	-1.125570162	0.023698823	0.337586292
ISF1	137.8097881	80.00817385	0.784459058	0.023768675	0.337586292
UTP11	0	45.57950355	#NAME?	0.024326448	0.344771635
VPS45	164.5468072	101.549964	0.696308304	0.024492227	0.346382618
SMX3	329.8108359	482.5564215	-0.549058836	0.02479568	0.349929685
BRR1	0	37.32597019	#NAME?	0.025003306	0.351367807
RPL11A	481.109984	367.0270385	0.39048039	0.024963588	0.351367807
YPR150W	40.59504983	0	Inf	0.025387384	0.356012535
CRD1	38.08506806	87.14835227	-1.194247913	0.025508737	0.35696121
RIF1	0	30.76638042	#NAME?	0.025847386	0.359430073
GAL80	208.6016438	139.7150548	0.578263042	0.025742035	0.359430073
KSP1	270.7798198	189.9913542	0.511186455	0.025842785	0.359430073
YIL177C	54.84122277	112.1571982	-1.032189572	0.025970647	0.359639354
OPI1	351.9519575	508.8529646	-0.531870333	0.025934173	0.359639354
LEE1	83.29764478	158.5178652	-0.928297834	0.026047532	0.359954147
YME2	124.8963854	209.5538897	-0.746589576	0.026283972	0.362467971
SMY1	80.71063838	39.99097067	1.013084547	0.026662109	0.364786334
YKL065W-A	102.833798	181.3998934	-0.8188591	0.026531908	0.364786334
YMR315W	245.8191084	370.9319138	-0.593557332	0.026604198	0.364786334
HOM3	284.5017632	200.9204938	0.501812867	0.026671605	0.364786334
LOT5	85.68950113	43.49501605	0.978268356	0.02683891	0.366320807
GYP8	47.0427702	0	Inf	0.027032043	0.368200801
AIM39	92.00480159	168.0010631	-0.868689302	0.027221297	0.370020374
ADE3	228.9268664	157.1035724	0.543170798	0.0273035	0.370380332
TOS3	0	52.85161828	#NAME?	0.027421244	0.370465469
YHM2	78.00917399	38.38670874	1.023036927	0.027398332	0.370465469
ERG12	38.29968954	0	Inf	0.027689183	0.373326571
IRC22	93.89405779	49.47416851	0.924358397	0.027988669	0.375082027
NIP100	24.49554455	63.52215028	-1.374740386	0.028337484	0.376855098
AAC1	66.36796938	131.9257249	-0.991166871	0.028347758	0.376855098
SKS1	156.9988999	95.15395946	0.722418855	0.028254569	0.376855098
COT1	172.9248845	273.2766905	-0.660216915	0.02829245	0.376855098
SHU2	109.1670604	62.8466906	0.796628927	0.028618873	0.379699901
YPL272C	38.12616885	0	Inf	0.028816913	0.381565784
SYN8	0	30.09084506	#NAME?	0.029043829	0.382548568
MYO3	30.56029969	75.19012303	-1.298884471	0.028952786	0.382548568
ERD2	79.33676732	149.3565728	-0.912699209	0.029071181	0.382548568
RPC40	161.2066553	100.2359586	0.685511153	0.029256606	0.383567375
SNC1	223.2487439	341.4956367	-0.613215087	0.029375914	0.38437342
NEJ1	47.64035692	0	Inf	0.029693226	0.386244372
ELF1	398.8248744	296.4860404	0.427791213	0.0296025	0.386244372
SPG4	1768.184791	2314.831211	-0.388637944	0.029654988	0.386244372
MAP2	242.5148804	169.4786537	0.516969698	0.029796348	0.386828764
PMT3	64.31948698	29.18842668	1.139859451	0.029901054	0.387431395
LSB6	0	47.31570179	#NAME?	0.030244859	0.387476281
IES3	59.55524571	26.65009748	1.160087778	0.030189868	0.387476281
SYS1	60.09376971	26.97200287	1.155752769	0.030278339	0.387476281
YJR056C	107.5837448	62.27151832	0.788815752	0.030076851	0.387476281
KRI1	144.0069631	87.11136266	0.725205753	0.030196587	0.387476281
COQ6	146.9604823	88.82125271	0.726451443	0.030312572	0.387476281
BUD20	328.9200936	239.4021493	0.45830104	0.030276491	0.387476281
LHS1	45.3270347	96.91646589	-1.096370014	0.031030231	0.395130167
MTQ1	51.32755019	0	Inf	0.031011787	0.395130167
HPT1	87.15835874	161.626026	-0.890948594	0.03116892	0.396137308
YGR240C-A	0	20.57599832	#NAME?	0.03127024	0.396666573
POP1	87.65578196	46.22865504	0.923061867	0.0317266	0.398651624
ASN1	94.55070721	168.8294266	-0.83640623	0.031647779	0.398651624
YHR020W	194.8154607	130.1948673	0.581435601	0.031576437	0.398651624
ASK1	512.6560126	400.1467244	0.357462016	0.031576955	0.398651624
CTS1	523.6996305	410.1630839	0.352541937	0.031702572	0.398651624
BCY1	229.3314609	159.3199962	0.525506935	0.031961177	0.400841406
CRM1	226.6299966	156.9082626	0.530417503	0.032199127	0.403065154
AIM22	48.02849909	0	Inf	0.032260514	0.403074504
SLY41	71.40589485	34.68735357	1.041633403	0.032382245	0.403836366
YIG1	202.0574274	312.0170292	-0.626859386	0.032673222	0.406702069
COX16	31.11678562	74.51466335	-1.259831317	0.032793315	0.407433954
SHQ1	0	42.62958728	#NAME?	0.033039238	0.408200395
CSM1	26.81404371	0	Inf	0.032989778	0.408200395
SIP4	33.279726	78.18771033	-1.232298305	0.032955335	0.408200395
YLR072W	36.61987789	82.41990745	-1.170365863	0.03325666	0.410124339
HEH2	0	43.68498513	#NAME?	0.033425757	0.411446315
FMC1	68.23926366	32.50257866	1.070047897	0.033771077	0.412703783
TRS23	73.16273114	36.39190291	1.007491441	0.033708763	0.412703783
YDR319C	79.95749289	40.98833574	0.964019823	0.033776269	0.412703783
UBP5	21.79408017	59.79648692	-1.456124413	0.034580088	0.421227356
GEP3	75.44012951	38.09645225	0.9856755	0.034600592	0.421227356
STE12	30.94326492	73.26395571	-1.24347817	0.034812302	0.422214446
PRK1	45.67407609	0	Inf	0.03479113	0.422214446
RFA1	41.17467462	89.66037329	-1.122713257	0.03510787	0.424294571
RRP1	0	35.61608013	#NAME?	0.035351427	0.424920315
PLP2	0	52.88326719	#NAME?	0.035225023	0.424920315
LSM5	47.0427702	98.36774835	-1.064212361	0.035327421	0.424920315
YDR132C	0	43.07816395	#NAME?	0.035454168	0.42506319
PXA1	44.70630913	94.21455148	-1.075471457	0.03549121	0.42506319
PWP2	84.16524824	44.00689052	0.935495233	0.035565546	0.425187378
ASH1	95.62775522	51.75389012	0.885762102	0.035911497	0.426342269
KCS1	107.6982028	63.80706606	0.755206071	0.03589143	0.426342269
GAS1	320.7298315	235.1115997	0.448012828	0.035918711	0.426342269
CCR4	49.18774866	0	Inf	0.036211416	0.428641597
AAD14	73.85681391	37.48429036	0.978444938	0.036241399	0.428641597
MTC1	227.9037041	159.6419016	0.513585004	0.036343882	0.429090204
MED2	129.377825	76.351149	0.760868591	0.036486521	0.430010468
SNO4	0	47.2577447	#NAME?	0.036585301	0.4304115
YGL108C	0	34.3020747	#NAME?	0.036919067	0.432529052
CDC40	82.65895728	42.85120526	0.947835381	0.036957062	0.432529052
RIM8	128.7570994	209.4959326	-0.702270252	0.036960509	0.432529052
GSP1	801.2510732	656.087909	0.28836525	0.037040973	0.432708869
NRK1	48.02849909	0	Inf	0.037414469	0.43581451
SNG1	170.8030449	112.220496	0.605997499	0.03750352	0.43581451
ISU1	623.9126562	839.7939078	-0.428691247	0.037477486	0.43581451
SET1	60.82895327	28.35464682	1.101172992	0.037692505	0.436484467
KGD1	267.9730149	193.2314513	0.471757794	0.037643466	0.436484467
FAR10	0	34.75065137	#NAME?	0.038500487	0.44473488
RRN10	0	54.26057042	#NAME?	0.038538783	0.44473488
YDL206W	142.4467864	88.20909083	0.691423822	0.038904555	0.447402379
YPR053C	204.8949791	312.3125507	-0.608105915	0.038859388	0.447402379
FMP45	65.7883446	124.184066	-0.916576157	0.039326435	0.450694508
DEF1	116.6918288	69.50664345	0.747480759	0.039283995	0.450694508
FTH1	132.0022647	212.4564546	-0.686604493	0.039538532	0.451568081
PET10	142.5021817	227.3752815	-0.674091417	0.039489358	0.451568081
TEL05L-YP	0	35.00925896	#NAME?	0.0400799	0.452046959
SET3	0	48.47672775	#NAME?	0.04018383	0.452046959
RMD1	23.78349986	60.95217218	-1.357716605	0.040260539	0.452046959
MMP1	36.19581187	80.33015492	-1.150118883	0.040016629	0.452046959
OPI10	130.2813523	78.40932831	0.732533393	0.040210488	0.452046959
YET2	208.2403079	144.9130438	0.523061891	0.040114987	0.452046959
YIL001W	0	25.9059236	#NAME?	0.041296846	0.452566021
TBS1	0	34.49204378	#NAME?	0.040615876	0.452566021
YIL102C-A	0	48.83028205	#NAME?	0.041272162	0.452566021
SKI7	0	52.366052	#NAME?	0.040879962	0.452566021
GRR1	21.62055947	58.28183099	-1.430642346	0.040937634	0.452566021
ATG7	25.24869004	62.2608369	-1.30211643	0.04085705	0.452566021
NOP4	27.23810973	66.44575835	-1.28655052	0.040908217	0.452566021
PCA1	37.19950267	81.49652159	-1.13145515	0.041311798	0.452566021
AIM10	42.62557031	0	Inf	0.041504491	0.452566021
YMR259C	63.62540421	30.79802932	1.046764877	0.041308738	0.452566021
FRE6	78.43324001	40.92503794	0.938481444	0.040389879	0.452566021
HEM2	92.94942969	51.43732544	0.853630384	0.041303997	0.452566021
SEC17	313.4464909	230.5258483	0.443290653	0.040904282	0.452566021
YNL134C	471.8941285	370.1351993	0.350410881	0.041027086	0.452566021
MRPS12	611.6933363	498.3984829	0.295508883	0.041736569	0.452566021
MBF1	1304.825808	1086.442015	0.264246045	0.040497321	0.452566021
RAD52	0	36.10164642	#NAME?	0.042210084	0.455471476
PET130	55.86805243	25.00884594	1.159585044	0.042299985	0.455701785
YBL065W	0	45.55319536	#NAME?	0.042584154	0.456825339
YJL077W-A	63.37485889	119.3553337	-0.913280504	0.042720948	0.456825339
STI1	742.7777792	612.4926055	0.27823823	0.042675967	0.456825339
HRP1	49.01422797	100.330981	-1.033494657	0.042835807	0.457029869
SNU13	386.947419	294.1745942	0.39546488	0.042906222	0.457047532
VPS75	0	39.2521375	#NAME?	0.043155592	0.458719287
SUE1	56.23305574	108.94875	-0.954159293	0.043201185	0.458719287
SSY1	53.29900795	22.98773192	1.213244551	0.043708446	0.460867059
MPD2	59.74672832	111.6769726	-0.902400119	0.043736568	0.460867059
NST1	84.60727619	151.8316042	-0.843618478	0.04375013	0.460867059
STT3	212.9777429	150.0900652	0.504874185	0.043890157	0.461467437
GLC7	348.3597508	263.7355355	0.401485974	0.043945974	0.461467437
YPL113C	29.16846671	67.92868971	-1.219611476	0.045175719	0.466677046
RMT2	62.0831894	30.08550435	1.045134133	0.045108958	0.466677046
LIA1	75.45809143	138.3640597	-0.874721734	0.045106989	0.466677046
YOR052C	455.2725517	618.1445119	-0.441213674	0.044977207	0.466677046
BAP2	496.8819194	394.574138	0.332606647	0.045425011	0.466677046
HAC1	1011.146544	839.9152384	0.267676453	0.045121928	0.466677046
GTR1	106.4244952	64.77819863	0.716249992	0.045691409	0.468689498
YJL068C	50.01791878	101.3020378	-1.018146262	0.045836224	0.46945051
MRPS18	188.6773484	130.1578777	0.535658599	0.046635752	0.476401789
CCS1	248.365014	179.9909412	0.464537663	0.046658277	0.476401789
UBP13	28.05031792	66.15550186	-1.237844022	0.047042223	0.479585364
SSP1	0	25.29910243	#NAME?	0.047295567	0.479997372
YNL146C-A	0	25.8426258	#NAME?	0.047334043	0.479997372
ULA1	0	37.23102348	#NAME?	0.047642899	0.479997372
YDR370C	30.5191989	0	Inf	0.048091509	0.479997372
IRC5	51.29162634	21.66838577	1.243131635	0.047372265	0.479997372
HBN1	59.70562754	28.99311689	1.042156481	0.047518873	0.479997372
YHR054C	77.0234451	139.5831185	-0.85775491	0.047286895	0.479997372
SNN1	88.25854561	49.60076411	0.831373628	0.048310251	0.479997372
CBF1	98.00531708	55.68020398	0.815695525	0.047940588	0.479997372
GCD11	100.916226	170.5130841	-0.756724287	0.048241792	0.479997372
MSN4	108.1222688	65.90223498	0.714264392	0.048185998	0.479997372
SKG1	117.7366204	71.52775747	0.718988004	0.047790241	0.479997372
YAK1	245.3950424	177.9961354	0.463260185	0.047836601	0.479997372
ANB1	39.66838366	0	Inf	0.048457815	0.480485947
MNE1	24.13054124	60.1130516	-1.316817984	0.048597735	0.480698128
LPX1	48.26108249	96.53660341	-1.000215792	0.048950894	0.482754587
DSF1	60.84691519	29.57362988	1.040872792	0.048943138	0.482754587
GTB1	46.28962472	0	Inf	0.049318641	0.484821658
BRR2	82.83247797	146.6228581	-0.82384158	0.049384537	0.484821658
MYO5	100.8623402	59.31092064	0.766017934	0.049449382	0.484821658
PPH21	106.0183911	176.3918735	-0.734469544	0.049452247	0.484821658
FAR1	0	23.3675944	#NAME?	0.049733904	0.48587032
YDL144C	29.40105011	67.05792024	-1.189540055	0.049924692	0.48587032
RNA15	35.96322846	0	Inf	0.049826375	0.48587032
BRF1	113.9724025	70.10812391	0.701030995	0.049807916	0.48587032
YGR266W	29.22752942	67.05792024	-1.198079855	0.050041683	0.486296877
SEC1	20.84945207	55.1629888	-1.403691156	0.050448783	0.488112169
YMR265C	57.77527055	28.12768813	1.038461131	0.050415866	0.488112169
BSC2	153.9324322	238.0142403	-0.628750665	0.050406333	0.488112169
YRB30	51.73365428	22.79242213	1.182548855	0.050582553	0.488695097
TDA7	101.5369516	60.21341469	0.753848012	0.050705383	0.489170796
MIC14	119.6669773	73.13736011	0.71034463	0.050826461	0.489628245
CPS1	28.99494602	66.22414037	-1.19155576	0.0511279	0.489693304
CLB1	59.68766561	29.47868317	1.017760751	0.051082695	0.489693304
SHH3	124.239736	198.2872179	-0.674465012	0.051680636	0.494275087
YBR255C-A	94.01218321	161.9795803	-0.784892318	0.052007744	0.495876539
SEM1	201.8428059	301.3516865	-0.578215972	0.052071886	0.495876539
MUM3	550.2488344	446.2541245	0.302218681	0.052060996	0.495876539
AAH1	0	29.51033207	#NAME?	0.052768266	0.49835831
TEL16L-YP	0	33.94852041	#NAME?	0.05299634	0.49835831
SUV3	56.59805905	27.03530067	1.065908177	0.052762423	0.49835831
MAG2	66.71501077	121.672045	-0.866914429	0.053254603	0.49835831
SEF1	91.11405926	52.04948732	0.807789732	0.053148417	0.49835831
FRA2	212.5162435	151.8631774	0.484801018	0.053119813	0.49835831
YDR524C-B	3509.133528	3116.328109	0.171267707	0.052820287	0.49835831
RVS167	211.9186568	151.6679433	0.482594416	0.053835171	0.500478859
TPO3	277.1094147	205.8598752	0.42879307	0.053782421	0.500478859
DAD1	30.13105673	67.28487893	-1.159031051	0.054041026	0.501690926
UBX7	53.44938979	24.46532257	1.127435173	0.054311231	0.501707111
BMS1	91.40721488	52.3344031	0.8045484	0.054220447	0.501707111
YOR093C	0	38.03315445	#NAME?	0.054655565	0.502448084
YKR047W	59.64656483	29.80058857	1.001098228	0.054727307	0.502448084
YMR321C	0	31.92206567	#NAME?	0.054824648	0.502647499
MRP13	47.27535361	20.25409292	1.222874773	0.055045962	0.503339335
YOL087C	76.65844179	137.2979805	-0.840793826	0.055051557	0.503339335
TRM8	0	32.50257866	#NAME?	0.055214159	0.50413258
VPS62	57.98989203	108.1095538	-0.898620664	0.055315082	0.50436125
TES1	32.31713598	70.5936902	-1.12723989	0.055904732	0.506409965
IDP1	78.25971931	139.3561598	-0.832434932	0.055920703	0.506409965
RAD16	102.0986144	62.10785743	0.717115584	0.055867665	0.506409965
HLJ1	128.9896828	80.40413414	0.681914089	0.055713479	0.506409965
RPL3	616.4666951	510.6207361	0.271770828	0.05578545	0.506409965
PBP2	0	24.56026927	#NAME?	0.056022189	0.506638762
YPL038W-A	0	25.04049484	#NAME?	0.056225498	0.506959031
AIM26	0	25.07214374	#NAME?	0.056532156	0.506959031
YRF1-2	50.78902618	99.58680709	-0.971437819	0.056667754	0.506959031
DAL81	64.99927527	33.46829484	0.957628583	0.056336166	0.506959031
TOA1	73.39531454	132.353334	-0.850634666	0.056624468	0.506959031
ALA1	136.7290726	88.14579303	0.633356415	0.056513206	0.506959031
PYC1	556.4444999	454.2650724	0.292703416	0.05661191	0.506959031
CTH1	152.3259778	98.9429963	0.622492506	0.056955978	0.508852665
ATG17	0	28.86652129	#NAME?	0.057869688	0.50904824
MSL5	0	32.33891777	#NAME?	0.05741631	0.50904824
ARG81	0	36.19659312	#NAME?	0.057647042	0.50904824
RAD26	0	46.38697522	#NAME?	0.05747364	0.50904824
ULP2	31.33140709	0	Inf	0.057993101	0.50904824
YIL030W-A	31.33140709	0	Inf	0.057993101	0.50904824
SEN54	41.46632073	0	Inf	0.057706374	0.50904824
GIM4	43.99426443	88.04008923	-1.000845157	0.057426198	0.50904824
MTC2	53.31696988	24.71858945	1.108998372	0.05799377	0.50904824
LIP2	56.81268053	27.58416475	1.042372677	0.057922993	0.50904824
RXT2	127.3704433	79.17981037	0.685826018	0.057348983	0.50904824
XRN1	231.2618179	169.3520581	0.449501572	0.058126616	0.50904824
AHA1	388.534402	301.8212307	0.364348054	0.057119496	0.50904824
VID28	32.85565998	71.74937545	-1.126824352	0.058287805	0.509788209
BNI4	0	21.37812928	#NAME?	0.058659125	0.509952837
YBR056W-A	0	48.09152456	#NAME?	0.058507338	0.509952837
ATG13	22.60628836	56.42437785	-1.319594465	0.058691609	0.509952837
HYM1	34.03287148	0	Inf	0.058805311	0.509952837
DPB3	130.6874564	82.81586774	0.658141552	0.058997101	0.509952837
RIB5	214.3126711	315.3257648	-0.557125904	0.058852085	0.509952837
YLR278C	0	35.04090786	#NAME?	0.05977771	0.514026437
GPB2	90.82759009	52.56136179	0.789127948	0.059755349	0.514026437
HAP3	100.1862194	60.65657497	0.723948137	0.059677192	0.514026437
YKL077W	183.2333188	128.6856278	0.509830929	0.059679923	0.514026437
GSF2	145.0660492	223.089997	-0.620915912	0.059880489	0.514244976
SNZ3	39.22635572	0	Inf	0.06031022	0.516336715
NVJ1	128.4691207	80.9423168	0.666455581	0.060357098	0.516336715
APT1	39.90096706	81.16927549	-1.024510023	0.060532047	0.517167755
PIN2	56.56213521	28.09603923	1.009469818	0.060800875	0.518132589
BNA3	58.93452013	107.9459686	-0.873124538	0.0607441	0.518132589
IRC21	61.09746052	30.86132712	0.985312313	0.060885558	0.518189887
GPI11	48.6260858	21.66838577	1.166138784	0.061470632	0.5203352
MND2	52.52790055	24.20671498	1.117676615	0.061392032	0.5203352
CAR1	62.02412669	111.3497265	-0.844196593	0.061364043	0.5203352
TPO1	65.55576119	117.819786	-0.845787359	0.061631833	0.5203352
PML1	97.85493525	57.89662779	0.757165294	0.061461736	0.5203352
MIC17	221.7296679	162.116933	0.451767032	0.061673598	0.5203352
HOM6	603.6160226	502.0716055	0.265737966	0.061685593	0.5203352
DFG5	32.1025145	69.02641788	-1.104462314	0.061769983	0.520386663
NOP6	119.8225361	74.57796115	0.684078013	0.062087311	0.522397916
MOB2	0	34.58699048	#NAME?	0.06231475	0.523648727
OPY2	30.57826161	66.86261045	-1.128693291	0.062407371	0.523764895
PPG1	50.23254026	96.8901577	-0.947727887	0.062793313	0.525015284
ATS1	57.52472523	29.47868317	0.964510107	0.062764835	0.525015284
KTI12	144.665122	93.86626222	0.624038521	0.062643513	0.525015284
ATG5	59.93821094	108.4894919	-0.856007386	0.063251946	0.526861758
ACP1	583.3641573	483.2897626	0.271508313	0.063241453	0.526861758
IES2	170.1412185	118.400299	0.523059968	0.063459626	0.527930077
AVT5	0	22.21190914	#NAME?	0.063770127	0.528115317
MSH2	27.04662711	0	Inf	0.063879151	0.528115317
GCD6	47.66349578	21.40977818	1.154614918	0.063696079	0.528115317
CTR2	79.0128648	137.910218	-0.803569877	0.063845998	0.528115317
TPK1	83.47116547	143.6676768	-0.783385693	0.064015258	0.528583132
ACS2	159.9149858	241.0487415	-0.592019756	0.064124396	0.528827371
ATG11	59.90228709	108.3365125	-0.854836562	0.064317909	0.529280048
SHB17	69.51663865	37.71124905	0.882363389	0.06437857	0.529280048
YFH1	154.9093167	103.7717285	0.578010464	0.064418167	0.529280048
TIM12	0	48.41342995	#NAME?	0.064546603	0.529680579
CFT1	0	31.56843571	#NAME?	0.064863799	0.531342597
IKI1	50.19143947	22.76077323	1.140891753	0.064918914	0.531342597
FCF2	62.6217134	32.82448405	0.931890648	0.065133355	0.531342597
PYK2	64.6111331	33.91687151	0.929779674	0.065118329	0.531342597
NUP159	84.05079026	48.57709084	0.790985291	0.065228759	0.531342597
GCN4	539.2822411	442.2488861	0.286182017	0.065180794	0.531342597
HMRA2	165.4734733	113.5505236	0.543265602	0.065311044	0.531361698
YGL188C-A	0	44.87231928	#NAME?	0.065416321	0.531567587
YPL119C-A	45.69203801	88.56264512	-0.954755519	0.06620758	0.532781161
CDC24	45.8655587	20.31739073	1.174696079	0.06630246	0.532781161
LRE1	57.75730863	29.73729076	0.957730302	0.065992234	0.532781161
TAN1	73.33625183	40.66108964	0.850877655	0.065880012	0.532781161
GOS1	82.81451605	47.80126807	0.792834781	0.065679104	0.532781161
NUP120	101.4008642	62.9416373	0.687983335	0.066447357	0.532781161
RPB10	127.1147211	80.62575212	0.656818499	0.06634372	0.532781161
IRC9	220.319873	162.1485819	0.442283227	0.066338966	0.532781161
APJ1	243.9118903	348.3032283	-0.513983756	0.06601649	0.532781161
ILV5	274.4310892	386.9432039	-0.495677893	0.065899492	0.532781161
YDR133C	639.0392176	834.7279308	-0.385401574	0.066368188	0.532781161
YOL036W	376.775072	295.3829715	0.351116859	0.066640149	0.533683217
AVT6	0	40.40782276	#NAME?	0.068443611	0.534556139
DAS1	0	42.47134278	#NAME?	0.067057948	0.534556139
YGR237C	24.13054124	57.5430735	-1.253782005	0.06725323	0.534556139
LDB17	26.64052302	0	Inf	0.067369901	0.534556139
YAP1802	29.7480915	64.77819863	-1.122711235	0.068663407	0.534556139
RSF1	31.67844848	67.51183762	-1.09163881	0.068241317	0.534556139
THI74	50.42402287	23.37293511	1.109272307	0.068217295	0.534556139
YHR180W	51.96623768	99.37052982	-0.935243444	0.068794261	0.534556139
YRF1-4	68.66332968	121.2921825	-0.820874844	0.068479178	0.534556139
RRP14	82.44951274	47.51635229	0.795086879	0.068819095	0.534556139
NOP53	96.92826907	58.43481045	0.730089429	0.068873608	0.534556139
MGR3	99.16456666	60.76227877	0.706648735	0.068878596	0.534556139
DSE1	111.5214834	71.26914988	0.645972036	0.068920507	0.534556139
SPE3	134.0096463	206.0551093	-0.620693384	0.067674844	0.534556139
TKL1	154.9504175	104.2202295	0.572171305	0.067673229	0.534556139
MXR2	179.3957437	264.6009643	-0.560672657	0.067980052	0.534556139
FAA4	321.4881539	445.3623876	-0.470214144	0.068691163	0.534556139
ETR1	387.8059049	525.8191381	-0.439231882	0.068000951	0.534556139
ZRC1	470.9443235	381.3755628	0.304344106	0.067222105	0.534556139
SMF2	57.56582601	105.7295448	-0.877094061	0.069251761	0.536499368
SSO2	83.795068	48.95695332	0.775351553	0.069832453	0.540368237
YOR114W	0	46.80382731	#NAME?	0.070429945	0.543725718
EFR3	0	35.07255676	#NAME?	0.070791197	0.543821563
HKR1	0	40.11756627	#NAME?	0.07059843	0.543821563
MCM5	0	43.94893343	#NAME?	0.070660061	0.543821563
TEL02L-YP	0	46.67723171	#NAME?	0.070851433	0.543821563
MRPL6	93.18201309	55.47955348	0.748095322	0.070718467	0.543821563
YDL068W	59.51414492	31.1462429	0.934174454	0.070949741	0.543948011
IPT1	66.36796938	35.87468773	0.88752086	0.071064947	0.544203576
YMR181C	349.2900844	274.3267476	0.348530393	0.071195931	0.544579237
YKL075C	31.50492779	0	Inf	0.071488891	0.546191559
RPC31	30.6927196	0	Inf	0.071775441	0.547751269
CYM1	0	34.2704258	#NAME?	0.071882572	0.54793974
YMR31	439.8491672	353.63857	0.314733248	0.07199723	0.548185098
MUB1	22.20018426	53.97031393	-1.281594428	0.072407065	0.548522578
AAD15	22.54722565	0	Inf	0.072698716	0.548522578
MGR2	50.34699824	94.92700077	-0.914912737	0.072477706	0.548522578
YNR021W	85.74856384	144.9183845	-0.757056214	0.072701729	0.548522578
FCJ1	99.47417469	61.69100534	0.689261867	0.072332297	0.548522578
FMP40	261.5895342	367.8291695	-0.49173107	0.072547249	0.548522578
YKR070W	102.9108226	66.15550186	0.637461662	0.073492017	0.553856504
BGL2	700.1649939	592.1913126	0.241631607	0.073700919	0.554801822
IQG1	0	45.38953447	#NAME?	0.074007088	0.555613024
OSW5	64.26409171	112.5161689	-0.80804759	0.074059446	0.555613024
YML133C	78.78028139	135.5301333	-0.782707176	0.073919102	0.555613024
HER2	0	26.39148989	#NAME?	0.074301939	0.556260738
OAC1	106.1148872	68.18195659	0.638165165	0.074313154	0.556260738
HSP33	72.71552626	40.95668684	0.828164428	0.074462241	0.556749736
AKL1	177.6389074	126.5957996	0.488718066	0.074559587	0.556851208
MEU1	0	31.18323251	#NAME?	0.074989361	0.556960778
NCL1	31.75547311	66.56701325	-1.067802174	0.07469914	0.556960778
ECM33	179.4870629	262.8223601	-0.55020816	0.07492564	0.556960778
AIM5	437.7221507	352.8310226	0.311037977	0.074993214	0.556960778
CDH1	33.08824338	68.78877777	-1.05585452	0.075416436	0.559478853
DAL82	82.10247135	48.37644034	0.763121033	0.075857663	0.562124737
YPL260W	172.7924646	122.9650829	0.490791597	0.07607869	0.563134805
SMY2	23.18591315	54.87273231	-1.242840868	0.076219332	0.56348865
MAL33	24.47758263	56.96256051	-1.218552911	0.076341579	0.56348865
GCN2	155.5531812	107.0225827	0.539492649	0.076635135	0.56348865
FAS2	881.8091718	1132.554605	-0.361042222	0.076447877	0.56348865
YPL264C	0	20.02713423	#NAME?	0.076785612	0.563589779
BEM1	37.77912746	75.8709991	-1.005959154	0.076842719	0.563589779
UBA4	44.93889253	20.31739073	1.145249436	0.077156771	0.563589779
SIF2	47.48997508	89.65503258	-0.916761568	0.076919192	0.563589779
EHD3	77.95011128	45.06762907	0.790459528	0.077242408	0.563589779
YHR182W	98.81752527	61.55365264	0.682922456	0.077163486	0.563589779
TPM2	141.9405188	94.76333989	0.582885533	0.077011468	0.563589779
SEC15	0	36.70846759	#NAME?	0.077451019	0.563879593
YCL021W-A	365.5040477	289.3936086	0.336854323	0.077451793	0.563879593
YEN1	0	47.030786	#NAME?	0.077614022	0.564442452
LIP5	60.63229371	32.21232217	0.912473733	0.077902124	0.565918489
SSO1	143.9119766	95.96143114	0.584660081	0.078233902	0.567708238
ARO10	0	42.88285416	#NAME?	0.078538628	0.568677846
ADH1	549.3723866	714.1745815	-0.37849239	0.078517898	0.568677846
BRO1	0	23.6631916	#NAME?	0.078674587	0.569042419
SIR2	0	30.89297602	#NAME?	0.079484557	0.571904237
ASK10	39.65042174	77.95007022	-0.975214111	0.079712005	0.571904237
YHR033W	42.41094883	81.74444776	-0.946683984	0.079698497	0.571904237
URA7	44.51482651	0	Inf	0.079479377	0.571904237
CDC4	68.70443046	118.6272577	-0.787960504	0.079267007	0.571904237
AIM45	104.3760128	67.73879631	0.623735941	0.079474789	0.571904237
TOM20	108.9113381	70.6886369	0.623603925	0.079758572	0.571904237
GPG1	708.5394038	602.5817985	0.233690992	0.079752008	0.571904237
ERC1	59.10804083	31.24653031	0.919658404	0.080055477	0.572797366
YHR032W-A	59.10804083	31.24653031	0.919658404	0.080055477	0.572797366
YSH1	34.97749958	0	Inf	0.080391871	0.574585772
MRP21	54.07011536	27.26225936	0.987926304	0.080787354	0.576792202
CPR3	183.0597981	132.6698987	0.464473918	0.081365601	0.580297369
GLT1	36.94895735	74.48835516	-1.011481251	0.081490183	0.580562968
PRI2	24.18960395	55.87017306	-1.20769114	0.082287078	0.580981621
OXP1	29.40105011	62.588083	-1.090020305	0.082033195	0.580981621
AGC1	31.92899381	0	Inf	0.082074364	0.580981621
GPI8	45.69203801	21.40977818	1.093672944	0.082197464	0.580981621
RPD3	95.65089408	58.50878968	0.709125079	0.081975491	0.580981621
RSA3	137.9616794	92.93753565	0.5699343	0.082335593	0.580981621
MTD1	177.7892893	127.8781561	0.475398566	0.08230262	0.580981621
PHO4	385.4627574	306.8979648	0.328832398	0.08231949	0.580981621
YIR007W	0	23.05102972	#NAME?	0.082475732	0.581353331
AEP1	98.85862606	62.588083	0.659478867	0.082586206	0.581515372
YLR352W	31.52288971	65.66993558	-1.058833247	0.083179219	0.584452718
RCR1	49.37923128	91.55489171	-0.890732593	0.083147153	0.584452718
IFM1	0	25.65265672	#NAME?	0.08346206	0.585820818
KIN1	43.7437191	83.42268891	-0.931363931	0.083729124	0.587075408
HIS5	149.8945301	102.0301896	0.554951646	0.083935514	0.587283535
COQ9	150.7247002	102.6846818	0.55369488	0.083928848	0.587283535
MSN1	46.75479153	87.31201316	-0.901065943	0.084156328	0.58805568
LAP3	80.76970108	136.3902214	-0.755854107	0.084222808	0.58805568
PMP1	63.00985558	108.3311718	-0.781799023	0.084421449	0.588206885
APA1	285.4731976	219.9556037	0.376142944	0.084420686	0.588206885
UGO1	0	32.82448405	#NAME?	0.084923901	0.589237129
YDL025W-A	20.03724388	0	Inf	0.084836229	0.589237129
KEX2	25.48127344	57.34776371	-1.17029985	0.084842269	0.589237129
YDR366C	102.8517599	67.27953822	0.612326772	0.084768094	0.589237129
YJR085C	709.9312368	606.3707596	0.227479108	0.08516729	0.590309675
ATM1	0	48.15482236	#NAME?	0.085684692	0.590405173
POG1	20.98187198	0	Inf	0.085740906	0.590405173
MAM3	48.02849909	89.33312718	-0.895304541	0.085802828	0.590405173
NUS1	96.65458489	157.721075	-0.706465374	0.085770446	0.590405173
MSN5	129.7017275	196.2553468	-0.597534265	0.085584092	0.590405173
TVP18	207.0953528	154.2062725	0.425433731	0.085480213	0.590405173
YGR161W-C	266.1300365	368.6313761	-0.470047524	0.085560463	0.590405173
MON1	28.45642201	60.0497538	-1.077404056	0.087085918	0.591720665
MRP20	43.99426443	83.42268891	-0.923124364	0.087425261	0.591720665
ASA1	44.4557638	20.28574183	1.131904419	0.086880872	0.591720665
PCC1	58.70193673	104.0989746	-0.826475851	0.087004241	0.591720665
YDL180W	62.19764738	107.4024452	-0.788094922	0.087379779	0.591720665
LYS21	108.8933762	171.3678314	-0.654180117	0.086608152	0.591720665
TAF10	178.8304134	130.0312064	0.459734215	0.087507359	0.591720665
FRA1	192.8619649	142.1900862	0.439747771	0.086320191	0.591720665
RAS2	376.6426521	301.1301442	0.32280925	0.086613639	0.591720665
IRC25	47.85497839	89.0482114	-0.895917617	0.08817313	0.595011976
DIP5	64.37854969	109.6875075	-0.768747243	0.088099961	0.595011976
MDM35	0	31.7637455	#NAME?	0.091694446	0.598811421
YBR221W-A	0	32.27561997	#NAME?	0.090032941	0.598811421
YGL006W-A	0	38.89858321	#NAME?	0.090426541	0.598811421
YDL158C	24.13054124	54.26591113	-1.169185932	0.091337059	0.598811421
PRP45	31.1578864	63.97606766	-1.037934947	0.08935457	0.598811421
OCH1	34.78601696	69.21638696	-0.992606138	0.092179238	0.598811421
YMC2	39.18892237	76.51480989	-0.965293115	0.089051101	0.598811421
TAF8	40.24800845	77.69680333	-0.948937846	0.089548555	0.598811421
YPL168W	40.65411254	0	Inf	0.091158331	0.598811421
PTR3	41.59874064	0	Inf	0.091251741	0.598811421
KEG1	43.33761501	81.84473518	-0.917269855	0.088927465	0.598811421
STE50	48.43460318	89.43349027	-0.884777058	0.089283529	0.598811421
YMC1	49.01422797	90.10894996	-0.878469808	0.091236219	0.598811421
ATP22	55.42084755	29.38373647	0.915410912	0.091765438	0.598811421
RAD1	57.11862113	31.11993471	0.876122119	0.092423807	0.598811421
MRPL49	57.41026725	101.8981776	-0.827747573	0.092389626	0.598811421
RRP15	60.01674508	33.07775093	0.859503934	0.091441492	0.598811421
GLE1	60.28525233	33.17269763	0.861808778	0.092413306	0.598811421
NUP53	63.7989249	35.62142085	0.84078705	0.091663002	0.598811421
YRF1-1	75.6136502	128.4270202	-0.764230161	0.092429745	0.598811421
STE18	97.46679308	157.2827844	-0.690378085	0.092121507	0.598811421
PBN1	105.073763	69.21104625	0.602328254	0.089363568	0.598811421
YLR311C	106.0917483	166.7134415	-0.652057979	0.091995082	0.598811421
CDC39	107.1956026	168.7768859	-0.654871614	0.089876802	0.598811421
YER158C	172.2682351	125.3081023	0.459177003	0.092397768	0.598811421
WTM1	269.0424549	370.8530649	-0.463013844	0.090072851	0.598811421
PHO84	310.2424263	243.6659953	0.348491061	0.090287008	0.598811421
MOS1	936.2501158	805.5814391	0.216863549	0.08948793	0.598811421
YDR524C-A	940.6867871	810.4053773	0.215070693	0.091797202	0.598811421
SNZ1	1704.090928	1484.937277	0.198600324	0.092050233	0.598811421
HRB1	86.73429272	53.23682148	0.704178077	0.092552494	0.599022809
RCO1	66.87056954	38.12810115	0.810516721	0.092663586	0.599158423
RPL2A	2438.789782	2172.746753	0.166645377	0.092808879	0.599514693
JID1	0	48.41342995	#NAME?	0.093026314	0.600335832
YOR238W	34.03287148	0	Inf	0.093209806	0.600936544
ISC10	31.6964104	0	Inf	0.09368765	0.603232314
PAF1	80.71063838	48.95695332	0.721245067	0.093928907	0.603232314
COS1	123.4865905	81.81308628	0.593950857	0.09378928	0.603232314
VEL1	223.0161605	169.694931	0.394204786	0.093898033	0.603232314
TOS8	65.30521587	37.06736259	0.817048755	0.094166092	0.604171825
PTP2	39.70948445	76.47782028	-0.945557775	0.094448095	0.605396803
MF(ALPHA)1	70.73128351	41.20995372	0.779355597	0.094837479	0.607307058
RET1	43.7437191	81.81308628	-0.903255742	0.095472888	0.609614111
NSG1	68.81888845	115.9885654	-0.75310609	0.095297021	0.609614111
HPA3	41.23373733	78.18236962	-0.923018082	0.095575783	0.609639757
HAS1	31.1578864	63.16859599	-1.019610135	0.096227087	0.609743989
AEP3	47.48997508	87.07971376	-0.874713666	0.096196472	0.609743989
CEM1	116.965513	77.34858975	0.596636323	0.09614084	0.609743989
DIE2	0	36.67681869	#NAME?	0.096472215	0.610715061
FMP23	24.30406194	54.17096443	-1.156322324	0.096963058	0.610913218
RSM7	66.54149008	112.7956683	-0.761385586	0.096900169	0.610913218
MID2	186.3049635	137.8731527	0.434324554	0.096873284	0.610913218
RPP0	439.6668022	575.1772411	-0.387595988	0.096747053	0.610913218
PNP1	21.02297276	49.34215652	-1.230854082	0.097319926	0.612581013
ASG1	25.65479413	56.51398384	-1.139379444	0.097648225	0.613908571
PPN1	72.58310635	122.9967318	-0.760914275	0.097715551	0.613908571
POS5	0	46.45027302	#NAME?	0.097965543	0.614897983
HRD1	26.29348163	57.28446591	-1.123438782	0.098135096	0.615381116
BUD8	0	31.72675588	#NAME?	0.098647383	0.615999308
CFD1	29.22752942	60.21333902	-1.042755237	0.0985792	0.615999308
PTP3	33.26176408	66.22414037	-0.993492526	0.099067739	0.615999308
YTP1	36.79339858	72.03963194	-0.969343867	0.098943628	0.615999308
TAT1	62.96875479	35.61608013	0.822107394	0.098596791	0.615999308
VAB2	68.29832637	40.02261957	0.771034628	0.098777514	0.615999308
SAC1	95.11237008	60.05509451	0.663346351	0.098342455	0.615999308
ROG3	118.7597826	78.72589299	0.593136235	0.098883864	0.615999308
VID24	186.39995	138.3270701	0.430317959	0.09903625	0.615999308
CRZ1	0	32.59752536	#NAME?	0.099921742	0.616122282
ALE1	28.58884192	59.47458153	-1.056821035	0.099679412	0.616122282
YMR262W	40.63615062	76.85768276	-0.919425735	0.09939514	0.616122282
MSS116	42.16040351	78.82083969	-0.902688444	0.099687144	0.616122282
CYB2	98.27900127	157.140562	-0.677100523	0.099489706	0.616122282
PET18	181.8646247	134.5010437	0.435247578	0.099258001	0.616122282
SIN4	42.93151091	0	Inf	0.100019109	0.616151081
OST6	0	29.18842668	#NAME?	0.101561602	0.616511387
MTG2	0	32.01701238	#NAME?	0.101330508	0.616511387
YKR012C	0	32.04866128	#NAME?	0.101035695	0.616511387
YLR225C	25.71385684	56.48233494	-1.135253713	0.100330911	0.616511387
SHE2	30.925303	0	Inf	0.101124282	0.616511387
ROY1	31.6964104	63.74910897	-1.008085712	0.101441884	0.616511387
YKL105C	32.6410385	0	Inf	0.100896835	0.616511387
YER137C	50.77106426	91.16968851	-0.844547744	0.100191809	0.616511387
YPL077C	54.11121615	29.16211849	0.891832138	0.100866593	0.616511387
MNT2	71.36479406	42.21273519	0.757534222	0.101008113	0.616511387
BNA2	72.36848487	121.5191412	-0.747750106	0.10106437	0.616511387
SPT6	95.91940133	61.40608956	0.643440922	0.101472629	0.616511387
RIM21	119.3573693	79.30640597	0.589778334	0.10069959	0.616511387
NCS6	119.53089	79.78663154	0.583164553	0.101425491	0.616511387
REX3	210.5320008	159.8950928	0.396913876	0.101560524	0.616511387
PIN3	322.5366129	257.4292126	0.325287161	0.101349104	0.616511387
SOG2	35.96322846	71.01054229	-0.981510685	0.101846538	0.61670541
YNL285W	58.56951682	32.82448405	0.835377658	0.102057462	0.61670541
UBP15	120.0319806	181.3682445	-0.595503038	0.102051559	0.61670541
RIM1	172.4828566	126.6328649	0.445801102	0.101788499	0.61670541
ARB1	244.6418969	189.695757	0.366984088	0.10202842	0.61670541
SRS2	0	24.49697147	#NAME?	0.102361641	0.617777437
OXA1	23.01239245	51.50062324	-1.162178912	0.102420752	0.617777437
SPT20	40.67207447	76.83137457	-0.917656988	0.102543847	0.617959157
RNH203	28.58884192	58.98367454	-1.044863521	0.103099987	0.619661975
PNG1	43.76168103	21.15117059	1.048930648	0.103060041	0.619661975
YGR201C	218.0013739	167.1619425	0.383090798	0.103106085	0.619661975
LAG2	31.91103188	0	Inf	0.103699001	0.621832575
YGL176C	52.64235853	27.57882404	0.932663186	0.103747905	0.621832575
SSE1	788.323376	681.461142	0.210156161	0.103981972	0.622674023
PSO2	0	38.41835764	#NAME?	0.104103504	0.622830748
YGR017W	71.81199895	119.3343663	-0.732712748	0.104195546	0.622830748
YMR018W	0	33.33635852	#NAME?	0.105351513	0.626882156
YOR352W	0	34.2704258	#NAME?	0.105662161	0.626882156
SET2	26.40793961	0	Inf	0.105670429	0.626882156
KTR3	29.3419874	59.53253862	-1.020711824	0.105158752	0.626882156
PRR1	33.81825	0	Inf	0.105263552	0.626882156
ROX1	125.6674928	84.86863066	0.566308202	0.105816425	0.626882156
CBR1	150.4921168	219.0478446	-0.541558102	0.10548652	0.626882156
RIB1	286.1852423	224.8632605	0.347901314	0.1053279	0.626882156
ZEO1	642.5455553	817.5503498	-0.347508841	0.105749085	0.626882156
SEA4	0	21.70003467	#NAME?	0.107034324	0.628256566
YGK3	34.94157573	0	Inf	0.107351969	0.628256566
NUP49	55.98251042	99.0695919	-0.823466126	0.107010792	0.628256566
HUL5	62.77727217	35.90633663	0.806003873	0.106547351	0.628256566
ODC2	69.41647516	115.4713502	-0.734184932	0.10638105	0.628256566
YHR175W-A	76.67640372	127.3346327	-0.731770281	0.107327499	0.628256566
TKL2	92.775909	149.4408381	-0.687752315	0.106277821	0.628256566
GOR1	122.5240005	82.62055795	0.56849167	0.107105828	0.628256566
SMF3	183.2153569	260.162776	-0.505874123	0.107014914	0.628256566
ALD5	189.5680907	142.6703118	0.410030986	0.106814683	0.628256566
MUP1	259.2710351	203.7067492	0.347967261	0.107371665	0.628256566
RPL41A	2895.09979	3493.544041	-0.271078251	0.106352442	0.628256566
IST2	38.72375556	73.77583018	-0.929929373	0.107597587	0.62847202
ATP1	565.3522569	481.9232921	0.230346525	0.107584715	0.62847202
YPR097W	40.82763324	0	Inf	0.108403073	0.63151203
ROT1	97.81383446	64.00771656	0.611792687	0.108332001	0.63151203
RDS3	91.77221819	57.86497889	0.665367016	0.108687087	0.632612142
YFL041W-A	33.45324669	65.22669962	-0.963316398	0.108793771	0.632679084
STE13	65.1496571	107.7559995	-0.725938705	0.109036224	0.632981469
MSN2	68.58630504	114.0887062	-0.734163544	0.109010597	0.632981469
PPZ2	26.46700232	56.41903714	-1.091987242	0.109932562	0.633991701
KRE6	38.31765147	72.87875252	-0.927489125	0.10959958	0.633991701
BDF1	88.64151085	141.894489	-0.678764181	0.109799785	0.633991701
MDR1	99.37918814	66.82562084	0.57254242	0.109762838	0.633991701
CAF16	120.9406849	181.3735852	-0.584664706	0.109544057	0.633991701
PKP2	141.1873733	98.20950385	0.523676523	0.109973286	0.633991701
FAA3	0	28.70820111	#NAME?	0.110810672	0.638265631
YDL086W	394.0712602	321.5528434	0.29340069	0.111236483	0.640163555
FRS2	88.27650754	141.3563063	-0.679234789	0.111358903	0.640313691
RPS6A	495.1841458	633.3324765	-0.354997936	0.111817465	0.642394719
ORC4	29.40105011	0	Inf	0.112122079	0.643033183
RPL15B	53.45456672	94.12486981	-0.816262759	0.112038926	0.643033183
YPL014W	277.3240362	219.1110667	0.33991031	0.112273376	0.643345803
YPL150W	31.6964104	62.61973191	-0.982297866	0.112724814	0.644902736
MET1	54.85918469	30.82967822	0.83141335	0.11288032	0.644902736
MTG1	93.5470164	149.6468293	-0.677798166	0.113030192	0.644902736
PIL1	527.8288517	672.6003164	-0.349679245	0.112878103	0.644902736
RHO1	537.0617476	456.4288042	0.234698129	0.112962347	0.644902736
CNA1	21.96760086	0	Inf	0.113230874	0.645493673
AIM6	53.89659467	95.15395946	-0.820069567	0.113361188	0.645682789
PRE5	153.8913314	221.9450688	-0.528290687	0.113493141	0.645880913
YTM1	23.35943384	0	Inf	0.113785018	0.646988036
KNH1	24.13054124	51.85959392	-1.103750634	0.114089283	0.648163645
SPT21	31.33140709	0	Inf	0.114304664	0.648832709
YML089C	54.64974015	96.36760181	-0.818333567	0.115044279	0.651547732
TAF4	88.14408763	140.8284097	-0.676002695	0.115118281	0.651547732
ATP3	969.0698519	845.646389	0.196546141	0.115285895	0.651547732
OPT1	51.75679314	27.51552624	0.91150231	0.115535682	0.651923328
IMA2	0	38.96188101	#NAME?	0.116150067	0.653709546
ANT1	42.799091	20.34903963	1.072619448	0.116215604	0.653709546
MIT1	51.54217167	27.55251585	0.903569266	0.116343974	0.653709546
FLC2	114.6844471	172.565847	-0.58947721	0.116257726	0.653709546
ERG1	172.6332384	244.5684894	-0.502528272	0.116161678	0.653709546
YIR014W	0	38.9565403	#NAME?	0.116484695	0.653851608
NQM1	1087.548991	955.882912	0.186174576	0.116565993	0.653851608
DSS1	24.90164865	0	Inf	0.117077403	0.653976716
ABD1	99.33808735	67.40613382	0.55946709	0.116728195	0.653976716
MRPS8	142.7758659	99.84007397	0.516061226	0.116890264	0.653976716
GET3	337.2263233	448.2806549	-0.410685088	0.117178617	0.653976716
PEP4	833.1943615	1049.981322	-0.333638683	0.117150257	0.653976716
PTK2	90.03334382	142.7336096	-0.66479378	0.11730524	0.654134171
DTR1	0	38.09111154	#NAME?	0.117424906	0.654252601
SEC12	25.88737753	55.45324529	-1.09902307	0.117788499	0.655180046
FSH2	54.11121615	30.05385545	0.848377588	0.117767462	0.655180046
PET8	21.02297276	47.80660878	-1.185243381	0.11804129	0.656037167
MGS1	0	33.98016931	#NAME?	0.118428487	0.65702436
RPI1	21.19649345	48.11783275	-1.182746045	0.11861382	0.65702436
SLI1	0	24.78188725	#NAME?	0.119109878	0.658124155
MDG1	140.1103253	203.099928	-0.535626451	0.119084687	0.658124155
YFR034W-A	27.41163042	56.70395292	-1.04866117	0.119454289	0.658931668
GSM1	53.06642455	29.0301065	0.870249483	0.119775533	0.660155862
MIG3	28.24180054	0	Inf	0.119897624	0.66028128
CRF1	20.44334797	46.22865504	-1.177155907	0.120759284	0.66282986
SAM35	70.65274937	115.4713502	-0.708717339	0.120669414	0.66282986
CDC8	74.22181722	45.93839855	0.69214276	0.120649741	0.66282986
PAU17	0	31.75840479	#NAME?	0.121618795	0.663166639
HIS6	24.66906525	0	Inf	0.121414151	0.663166639
SFI1	33.62676739	64.80984753	-0.946602944	0.121182646	0.663166639
RPC34	47.25739168	24.23836388	0.963247685	0.121539471	0.663166639
RTT105	68.23926366	41.72716891	0.709615039	0.121574761	0.663166639
TAF1	97.40773037	65.10010402	0.581376422	0.121163537	0.663166639
YKL151C	400.637106	330.3078895	0.278484617	0.121254304	0.663166639
MRPS17	407.0616875	336.2236685	0.275826155	0.121192171	0.663166639
PAP2	34.95953766	66.45109906	-0.926606956	0.122042117	0.664384892
ARN1	170.4560035	127.5615914	0.418205411	0.121984756	0.664384892
YFL040W	25.46331151	0	Inf	0.122327304	0.664986955
RHO3	65.32317779	38.93023211	0.746704029	0.122352798	0.664986955
RPO31	27.41163042	0	Inf	0.122584965	0.665704461
YOL085C	21.96760086	48.69834573	-1.148495447	0.123641304	0.666346203
MCM2	27.00552633	0	Inf	0.123644884	0.666346203
YMR166C	28.74440069	0	Inf	0.123995879	0.666346203
POL31	40.63615062	0	Inf	0.123217039	0.666346203
ECM29	55.59436825	96.28333653	-0.792347393	0.12418296	0.666346203
YER134C	69.99609995	42.88285416	0.706873609	0.123677524	0.666346203
TCM62	70.40220404	43.40006935	0.697923247	0.124206852	0.666346203
SUL2	97.40773037	65.70158448	0.568108107	0.123139306	0.666346203
ADE12	109.9561297	75.67568931	0.539026216	0.122983102	0.666346203
SLA1	152.6550572	218.5885108	-0.517942189	0.123358941	0.666346203
VMA6	214.6971458	167.093304	0.361649092	0.123800268	0.666346203
YOR021C	283.5802739	225.8976909	0.328087658	0.123025277	0.666346203
YER079W	462.0800984	389.650459	0.245962439	0.124186553	0.666346203
MON2	36.73433587	69.72292072	-0.924503814	0.124542294	0.66734419
PPZ1	38.72375556	72.10827046	-0.896945862	0.124593672	0.66734419
APL6	76.40271953	47.57965009	0.68327933	0.124882708	0.668353754
FET5	41.06021664	75.06352743	-0.870370848	0.125090864	0.668929183
YBL044W	21.02297276	47.09408381	-1.163579144	0.126961978	0.672476855
MNL1	31.50492779	61.52734445	-0.965650224	0.126551433	0.672476855
SNX4	49.43829399	85.99266702	-0.79858468	0.126452196	0.672476855
HPM1	58.58747875	34.29673399	0.772521168	0.126067295	0.672476855
NOT5	62.83633488	37.57923707	0.741663256	0.126991689	0.672476855
YIP1	74.32198072	121.4450863	-0.708443263	0.126446706	0.672476855
PAM1	88.10298684	138.717614	-0.654888154	0.126725436	0.672476855
VPS55	108.4872721	163.5049177	-0.591808234	0.12679453	0.672476855
SSQ1	110.2852092	166.3335034	-0.592839472	0.126974668	0.672476855
STE20	120.0730814	82.65220685	0.538787511	0.127069494	0.672476855
GRX7	125.5904682	87.47567405	0.521773192	0.126639098	0.672476855
YLL044W	66.30890668	40.37617386	0.715698463	0.127250125	0.672897043
VPS24	116.9244122	173.5686285	-0.569930037	0.127425753	0.673003834
HIS4	263.5055967	210.530363	0.323805289	0.127472819	0.673003834
YOR111W	26.29348163	54.90438121	-1.062216089	0.127744645	0.673903693
VTC3	88.68261163	139.1924989	-0.650358304	0.128131479	0.674873168
NDT80	0	32.33891777	#NAME?	0.128442885	0.675977716
RRT1	182.4801734	139.0659033	0.391970985	0.12878373	0.677235328
LDB7	85.78966463	135.757092	-0.66215181	0.129087333	0.677759478
CCW14	239.9689747	189.996695	0.336873571	0.129001852	0.677759478
YMR185W	28.3973593	57.09449683	-1.007594917	0.129556929	0.67861695
APD1	199.5474456	154.7551366	0.366744515	0.129841611	0.679572588
TRM82	49.2647733	26.68174638	0.884703321	0.13010384	0.680409302
SCT1	24.08944046	0	Inf	0.130242898	0.680601055
HEM13	67.85112149	41.98043579	0.692655519	0.130360511	0.680680533
RRN6	0	31.75840479	#NAME?	0.131397333	0.684481249
VHS3	152.2669151	217.0792713	-0.511619467	0.131327964	0.684481249
YPR015C	54.07011536	31.1462429	0.79577329	0.131775445	0.685108593
AHC2	250.3364718	338.2077929	-0.434041408	0.131930043	0.685108593
PUS4	0	26.13822301	#NAME?	0.133496234	0.685975145
YBP2	0	27.28856755	#NAME?	0.133338779	0.685975145
KEI1	0	32.59752536	#NAME?	0.133064062	0.685975145
SHG1	0	37.25733167	#NAME?	0.133287107	0.685975145
USB1	0	37.32062947	#NAME?	0.132808456	0.685975145
ABZ1	26.25238084	54.7777856	-1.061142679	0.13242935	0.685975145
YAP6	52.12179645	29.15677778	0.838055518	0.13341526	0.685975145
AFT2	56.81268053	33.01445313	0.783115225	0.13289708	0.685975145
LDB19	82.87357876	54.03895244	0.616912516	0.132458406	0.685975145
SOK1	88.66464971	57.92827669	0.614091275	0.13236398	0.685975145
SWH1	159.8790619	118.938406	0.426766368	0.13270045	0.685975145
SRP1	294.0159512	237.0484484	0.310712477	0.133194092	0.685975145
YLR031W	0	43.20475956	#NAME?	0.133815486	0.686850607
DPB11	0	29.51033207	#NAME?	0.133963621	0.687080392
WRS1	127.3652664	89.91364017	0.502359997	0.13435232	0.688326377
RPT5	169.6848961	237.9455261	-0.487773175	0.134510037	0.688326377
TRK1	187.2316297	143.9896579	0.378858981	0.134618265	0.688326377
GTT1	435.3856896	558.6961629	-0.359769922	0.134620775	0.688326377
IDH2	251.9377493	339.5748857	-0.430662458	0.134797178	0.688698574
MDM38	72.39162373	116.1414692	-0.681988508	0.134931257	0.68885412
YML6	42.23742814	75.7652953	-0.843015175	0.135310109	0.689728753
TCB3	278.6875534	224.1560762	0.314144963	0.135240752	0.689728753
YOR059C	68.00668026	42.27069228	0.686018728	0.135560557	0.690475877
ELP4	36.56081518	0	Inf	0.135908555	0.691169587
SFB2	87.09929603	57.02585832	0.611044802	0.135834996	0.691169587
SOD1	1789.738953	2188.578133	-0.290244715	0.136008699	0.691169587
HXT10	0	22.82407103	#NAME?	0.136886773	0.692455389
VPS5	46.7368296	81.71813957	-0.806096487	0.136414108	0.692455389
TFC6	47.62239499	25.29910243	0.912553976	0.136685679	0.692455389
FHL1	49.37923128	27.00365177	0.870749858	0.13681443	0.692455389
PEX22	84.05079026	132.5433031	-0.657130489	0.136776203	0.692455389
BRX1	110.3817052	77.15327996	0.516701683	0.136587502	0.692455389
UTP20	42.58446953	75.9342969	-0.83442427	0.137214285	0.692987806
YGR149W	50.19143947	86.18797681	-0.780045305	0.137223135	0.692987806
YHB1	224.193372	177.2942918	0.338597539	0.13730479	0.692987806
LRO1	0	28.7028604	#NAME?	0.137589718	0.693678071
TPD3	257.6158718	206.9259545	0.316106869	0.137650275	0.693678071
SLD2	0	26.42313879	#NAME?	0.1380685	0.695258575
TFB5	167.886959	127.3346327	0.398865311	0.138499396	0.696900444
SNF3	0	40.05426847	#NAME?	0.139976094	0.697397635
YBR012C	21.96760086	0	Inf	0.139648574	0.697397635
SQS1	34.03287148	0	Inf	0.139715184	0.697397635
GPI12	42.00484474	74.83656874	-0.833187678	0.139603999	0.697397635
TMA23	43.57019841	23.08267862	0.916531032	0.138814576	0.697397635
COG4	46.9103503	25.00884594	0.90746779	0.139185445	0.697397635
SEO1	63.2604009	38.63997562	0.711208515	0.140064703	0.697397635
NAR1	74.45440062	119.4502804	-0.681981214	0.140171993	0.697397635
SIC1	85.74856384	56.41903714	0.603930464	0.139172108	0.697397635
CKS1	91.98166273	142.2163944	-0.628669603	0.14010689	0.697397635
IRA1	115.4966553	80.05057985	0.528867315	0.139371161	0.697397635
GIP2	145.2447468	104.9220731	0.469167767	0.139721312	0.697397635
TRR1	250.2311314	200.6564699	0.318533613	0.13906676	0.697397635
AMS1	266.4719009	214.5833481	0.312445285	0.140690618	0.699454402
ATP11	71.75293624	114.3156649	-0.671913338	0.140997169	0.699816702
ARF2	1293.474092	1600.877869	-0.307612092	0.141079341	0.699816702
ENO1	1840.90059	1647.98271	0.159710616	0.141040179	0.699816702
MVB12	32.3350979	61.17379016	-0.919812686	0.141205308	0.699919228
ECM22	65.9207645	41.11500702	0.681067899	0.14139817	0.700352934
RAT1	20.79038936	45.67445025	-1.135470587	0.141544156	0.700553986
RPB8	116.6918288	171.1934891	-0.552924293	0.141683037	0.700719602
AIM32	0	33.59496611	#NAME?	0.141870929	0.70106644
UBX6	107.4461479	75.49113662	0.509234588	0.141964108	0.70106644
NIF3	93.5470164	145.0133312	-0.632421988	0.142325349	0.701632628
AMN1	176.6172547	135.2978339	0.384487552	0.142239667	0.701632628
RPS1A	587.8994826	735.9593525	-0.324056579	0.142395429	0.701632628
ATP2	791.1033745	697.1025529	0.182495315	0.142656625	0.702398952
SPG3	67.48611818	42.27069228	0.674933032	0.143319775	0.702902871
SGF11	115.2872108	80.34083634	0.521027094	0.143393455	0.702902871
UBC13	120.9586468	84.86863066	0.5112106	0.143241047	0.702902871
GRS1	135.5107604	194.2288921	-0.519350407	0.143375257	0.702902871
LCL2	167.0336501	127.0760251	0.394446903	0.143125983	0.702902871
YCG1	25.84627675	0	Inf	0.144105233	0.705351608
SED1	1538.341237	1370.051234	0.167145715	0.144019119	0.705351608
GRX6	33.279726	62.30316722	-0.90466195	0.14425684	0.705574108
ULP1	34.43897558	63.68581117	-0.886929755	0.144702061	0.705857209
DSF2	61.6180226	37.25733167	0.725828031	0.144711111	0.705857209
UFD2	89.99741998	59.50623043	0.596842914	0.144744367	0.705857209
AFG1	100.4419417	70.53039239	0.510044852	0.14484568	0.705857209
QRI5	178.4279768	247.0434451	-0.469422935	0.144568126	0.705857209
TIM13	224.2344728	305.3623413	-0.445514065	0.145324145	0.707670029
YMR173W-A	944.2184216	835.6195921	0.176274312	0.145720047	0.709078442
UTP8	21.60259755	46.42396483	-1.103664945	0.145991129	0.709358945
GPI13	25.11627013	51.40567654	-1.033305446	0.145962243	0.709358945
PDC6	120.5525427	85.02695084	0.503669974	0.146131741	0.709523506
RRP9	0	33.10939983	#NAME?	0.146387114	0.709890773
YBR116C	81.11674247	127.7091545	-0.654790323	0.146420979	0.709890773
PAU18	0	25.87961541	#NAME?	0.146660544	0.70991609
CWP1	69.99609995	111.2284716	-0.668179683	0.146828184	0.70991609
MHP1	140.6899501	101.8032309	0.466735928	0.146973862	0.70991609
RBA50	182.8503536	141.6358814	0.368476619	0.146973079	0.70991609
SDH3	280.7643516	227.4123468	0.304049185	0.147067016	0.70991609
ZPS1	3989.907098	3721.263061	0.100562774	0.146903134	0.70991609
YGR122W	20.03724388	44.5557546	-1.152927696	0.148080707	0.713772633
DDR48	963.6580788	853.6889101	0.174810908	0.147997808	0.713772633
YMR316C-B	0	26.96666216	#NAME?	0.149963905	0.714476915
BUL1	0	34.13848949	#NAME?	0.149260215	0.714476915
TAF11	20.84945207	45.35788557	-1.121343919	0.150955962	0.714476915
PDR17	25.82831482	52.04948732	-1.010930436	0.14896138	0.714476915
TDA11	26.23441892	0	Inf	0.149397162	0.714476915
PEX32	26.46700232	53.04158736	-1.002929148	0.149486925	0.714476915
IWR1	28.82142532	56.00210937	-0.958339485	0.151387428	0.714476915
PAU9	29.16846671	0	Inf	0.150229503	0.714476915
SRB7	31.5639905	0	Inf	0.150222334	0.714476915
CSI2	31.67844848	0	Inf	0.151085135	0.714476915
CDA2	36.31026985	0	Inf	0.149879956	0.714476915
RPL36A	41.21577541	73.2902639	-0.830424922	0.151317944	0.714476915
YLL032C	42.93151091	23.14597642	0.891275523	0.149995727	0.714476915
LCB5	47.62239499	25.87961541	0.879823999	0.150200714	0.714476915
BNS1	52.35437986	88.46769842	-0.756840555	0.149324387	0.714476915
ACF2	60.28525233	36.7138083	0.715482345	0.150939289	0.714476915
LYS1	87.67892082	58.31889627	0.588266625	0.1500319	0.714476915
HIS7	105.0506242	74.29304537	0.499785664	0.15031738	0.714476915
LSM12	128.6426414	92.87423785	0.470018563	0.149005121	0.714476915
RCF2	133.4120596	96.87947628	0.461626112	0.148995603	0.714476915
HMLALPHA2	158.7198124	119.6509309	0.407650604	0.14980763	0.714476915
PIR3	209.2762551	165.7846393	0.33609829	0.151336286	0.714476915
YBL029C-A	227.0001768	181.7587884	0.320668298	0.150584622	0.714476915
ARO2	234.3103237	187.5478961	0.321161442	0.149070287	0.714476915
MOH1	242.6330058	195.0996616	0.314564541	0.148684658	0.714476915
YNL143C	427.8572538	545.5349727	-0.350542137	0.151451478	0.714476915
SCL1	564.3680375	492.7252894	0.195852764	0.150630381	0.714476915
RPS13	669.0536584	833.3768601	-0.316847122	0.150606627	0.714476915
APM2	0	36.7771061	#NAME?	0.151937013	0.716030409
MTQ2	50.49738007	84.83698176	-0.748484756	0.152103947	0.716030409
HTS1	99.14660473	151.092771	-0.607799364	0.151997368	0.716030409
YKR051W	26.64052302	53.43213127	-1.004085157	0.152348646	0.716185656
THI7	371.413244	310.2282145	0.259695358	0.152352417	0.716185656
GDH3	87.85244152	135.757092	-0.627873281	0.15247569	0.716258594
XRS2	0	33.13570802	#NAME?	0.152913206	0.717299985
AIM2	99.14660473	150.9082183	-0.606036103	0.152904908	0.717299985
CDC34	50.5744047	85.48079255	-0.757192851	0.153030289	0.717342969
EMC3	151.5189465	212.551477	-0.488314079	0.153143471	0.717367621
MAK3	53.23994525	31.3468934	0.764186614	0.153287395	0.717536135
SAF1	0	39.5740429	#NAME?	0.153645102	0.718623909
YAF9	94.68830406	65.06845512	0.541227933	0.153736001	0.718623909
GIN4	34.20639218	0	Inf	0.154477777	0.721180647
WAR1	50.72996347	28.9351598	0.81001451	0.15493395	0.721180647
CTP1	76.0197543	120.3157092	-0.662378755	0.15491811	0.721180647
RAM2	76.03771622	120.3210499	-0.662101954	0.1548137	0.721180647
ENT5	131.2850431	95.70282355	0.456069169	0.154531661	0.721180647
CPR1	3801.861204	4466.551522	-0.23245554	0.154830941	0.721180647
TRM3	43.24111895	75.31679431	-0.80056774	0.155373502	0.722720552
YDR179W-A	0	26.20152081	#NAME?	0.155779787	0.72280881
PSD1	175.1057868	135.4721762	0.370230186	0.155702175	0.72280881
YPT1	650.6317133	574.0163665	0.180749273	0.155827445	0.72280881
RPL19A	1011.164506	1244.173225	-0.299169636	0.155554648	0.72280881
YHR202W	65.30521587	41.08335812	0.668644112	0.156035861	0.722946912
KAP104	65.7883446	41.72716891	0.656844971	0.156074743	0.722946912
RAD30	0	21.99029116	#NAME?	0.156639654	0.723713178
NOC2	51.36865097	29.73729076	0.788614971	0.156675683	0.723713178
SPC3	81.48174578	126.838385	-0.638442617	0.156353344	0.723713178
YJL055W	305.7393574	401.5663579	-0.393336129	0.156485854	0.723713178
VPS3	0	32.88778185	#NAME?	0.156913712	0.723806691
RPL34B	625.5476996	776.8735577	-0.31255991	0.156806619	0.723806691
ARO4	126.1880549	91.32793302	0.466447263	0.157533461	0.726161524
SEC31	86.47857046	57.89662779	0.578863354	0.157783672	0.726805521
ACT1	1417.25017	1266.347993	0.16242053	0.157891857	0.726805521
TAH11	309.5806	255.508386	0.276944424	0.158489809	0.729053121
IZH4	28.93588331	55.87017306	-0.949218604	0.158757876	0.72927685
RSM28	116.3268255	82.33030146	0.498688413	0.159236856	0.730650644
NPL4	24.30406194	49.31050762	-1.020697653	0.159448384	0.730933384
YOL106W	28.37422044	0	Inf	0.160476867	0.734129205
YDR266C	32.85565998	0	Inf	0.1604398	0.734129205
GAR1	64.57003231	102.1884341	-0.662295264	0.160440123	0.734129205
MRPL36	184.274443	144.1742106	0.354042875	0.160620658	0.734281648
SKP2	37.35506144	0	Inf	0.161167653	0.736275868
ESBP6	113.8168437	165.5839888	-0.5408491	0.161527005	0.736505169
COF1	993.8804546	1219.950883	-0.295678826	0.161586532	0.736505169
YDR333C	26.65848494	52.52971289	-0.978538908	0.161969318	0.737404149
YDR109C	53.66401126	32.24397107	0.734925464	0.162223266	0.738054792
PAM18	54.70880286	33.43130522	0.710573305	0.162779873	0.739238639
LPP1	66.23188204	42.78256675	0.630502814	0.16271386	0.739238639
TIM10	293.20892	241.0434008	0.282636061	0.162817116	0.739238639
YLH47	111.5768787	79.76032335	0.484294934	0.162944669	0.739309321
MCM7	0	22.56546344	#NAME?	0.163320643	0.739554087
BDS1	37.72006475	0	Inf	0.163331638	0.739554087
COS111	57.41026725	35.36281325	0.69907572	0.163679069	0.739898911
MRPL50	169.2197293	131.1922324	0.367215478	0.163559972	0.739898911
NCP1	192.4841766	152.4700743	0.336213743	0.163741733	0.739898911
TCB1	68.66332968	107.017242	-0.64023153	0.164009773	0.740606633
CSH1	51.67459157	30.34411194	0.768038482	0.16416115	0.74078694
HSE1	127.0413639	92.90054604	0.451539325	0.165034179	0.743716739
PRS2	96.98366435	68.73082068	0.496784578	0.165502356	0.745321245
VPS15	22.37370496	45.90674965	-1.03690211	0.166039858	0.746174134
SMC1	25.88737753	51.49528253	-0.99219145	0.16595575	0.746174134
CRG1	31.09882369	0	Inf	0.165919738	0.746174134
PEX28	34.43897558	0	Inf	0.166246146	0.746174134
ENT3	150.2221001	209.4063266	-0.479207958	0.16625303	0.746174134
YDR061W	50.38292209	29.28337338	0.782853039	0.166496094	0.746760821
POL5	0	25.62100782	#NAME?	0.166710457	0.747218074
MNP1	167.8330733	129.973325	0.368811479	0.167076786	0.748355388
BRR6	0	40.05426847	#NAME?	0.168315576	0.749861687
SKI3	21.79408017	45.09927797	-1.049168021	0.167703269	0.749861687
MKK2	39.84190435	70.36673151	-0.820606896	0.167694314	0.749861687
OTU2	56.77157975	34.52369268	0.717582103	0.168049944	0.749861687
YHL050C	66.94759417	103.9353894	-0.634582851	0.168076548	0.749861687
RPL9B	232.3388659	188.2181664	0.30382463	0.16821221	0.749861687
SSE2	472.1288699	408.389896	0.209233531	0.168493089	0.75014974
AVT2	27.00552633	52.61931888	-0.962337908	0.169045686	0.750942135
ECM30	36.96691927	65.26376491	-0.820047397	0.169178373	0.750942135
RMD6	43.99426443	24.75023835	0.829873032	0.168953219	0.750942135
RVB1	80.71063838	54.7777856	0.5591679	0.169224211	0.750942135
MCT1	158.9292569	122.0680052	0.380699621	0.169342795	0.750942135
ICS2	22.95332974	47.09408381	-1.036842378	0.169950726	0.751605109
ISA1	90.51647255	137.1080871	-0.5990614	0.169761725	0.751605109
PHO3	268.0192927	351.807198	-0.392448148	0.17039943	0.753088437
PHO90	27.41163042	52.88326719	-0.94802317	0.171680065	0.754234893
YGR168C	41.81336212	72.17156826	-0.787466552	0.170972038	0.754234893
YBR241C	66.71501077	103.5024395	-0.633581465	0.171012168	0.754234893
ATO2	116.4269889	83.45433781	0.480366583	0.171551312	0.754234893
TFA2	185.5697799	146.8392111	0.337724518	0.171564021	0.754234893
NUM1	232.4390294	310.2437656	-0.416549884	0.171376784	0.754234893
SIM1	249.9072288	204.5195616	0.289153795	0.171670406	0.754234893
CTT1	368.337932	471.2682355	-0.355518468	0.171374323	0.754234893
HSP42	1472.328292	1795.143978	-0.286000166	0.171151773	0.754234893
YFR032C-B	349.9804997	295.3249387	0.24497135	0.172057583	0.755394156
SWS2	221.610033	179.3154059	0.305523756	0.172247041	0.755726788
ENT1	56.01843427	91.58654061	-0.709233938	0.172588899	0.75573018
YLL066C	74.10735924	114.4106116	-0.626532147	0.172512951	0.75573018
YGR250C	295.1788683	385.2809849	-0.384321542	0.17254735	0.75573018
RPL18A	700.8307609	864.2275058	-0.302345049	0.172789554	0.756110707
OYE3	69.11053456	44.84601109	0.62392597	0.173295894	0.757114329
CLG1	195.8279959	156.3910474	0.324429102	0.173360615	0.757114329
YHR112C	234.0454839	190.3765574	0.297933088	0.173260825	0.757114329
MUD1	25.30775275	49.7960739	-0.976452594	0.174040853	0.759246099
DFR1	49.20571059	28.70820111	0.777362825	0.174077186	0.759246099
TIM9	139.8957038	195.3792366	-0.481925499	0.174262397	0.759555512
SLM3	0	28.44959352	#NAME?	0.174501503	0.760099273
MDL2	228.6373782	186.0333158	0.297500268	0.17478629	0.760704782
RPL43A	1128.018853	1016.993102	0.149481288	0.174869401	0.760704782
OCA1	28.8034634	54.58247581	-0.92219554	0.175402406	0.762524388
YGR042W	172.4417558	134.9603774	0.353573244	0.175715551	0.763145644
RTC3	619.4917889	550.2580768	0.170976744	0.175774933	0.763145644
ARF3	36.02229117	0	Inf	0.176133454	0.763206694
YEL043W	53.34010874	86.99010777	-0.705630586	0.176075397	0.763206694
RPS10B	1232.854856	1110.806899	0.150394919	0.17612787	0.763206694
PEX27	0	24.49697147	#NAME?	0.177366178	0.763397045
PMI40	23.31833305	46.74587022	-1.003374256	0.177385509	0.763397045
YDL016C	36.54285325	0	Inf	0.176475237	0.763397045
YGL140C	39.05283502	68.69917178	-0.814865422	0.177230197	0.763397045
CKA1	60.4408111	38.03315445	0.668265421	0.177158292	0.763397045
MRPL24	63.20133819	40.59779184	0.638553846	0.176722823	0.763397045
CKA2	110.0705877	79.53336466	0.468796903	0.177440715	0.763397045
PDR16	120.6706681	87.57062075	0.462556194	0.177016288	0.763397045
DOA1	139.3392179	103.2545134	0.432396526	0.176686002	0.763397045
FRS1	139.4536759	103.4181742	0.431296222	0.176680453	0.763397045
CMC2	144.4505006	108.046256	0.418926123	0.176866525	0.763397045
ZRT3	255.1469908	210.1450841	0.279942919	0.177863988	0.76472311
YPR071W	26.81404371	0	Inf	0.178376731	0.765936776
YHL026C	51.56013359	30.86132712	0.740455899	0.178502822	0.765983381
NIT3	207.2457347	166.9086756	0.312283464	0.178789305	0.766717748
IME1	55.24732686	89.91364017	-0.702635332	0.179071412	0.766937936
MFT1	53.12548726	86.59948819	-0.70495433	0.179433041	0.767991901
NPP1	42.99057362	73.301021	-0.769812933	0.179720388	0.768421882
RTF1	69.82257925	45.90140894	0.605155214	0.17976471	0.768421882
STE14	28.00921713	0	Inf	0.180123247	0.76896546
ARP8	93.5470164	66.16084257	0.499714033	0.180049952	0.76896546
COS8	81.17580518	124.7275893	-0.619658925	0.180363733	0.769497905
PSF3	0	37.93279136	#NAME?	0.180890423	0.769796898
MAK11	20.61686867	43.68498513	-1.08331227	0.180996922	0.769796898
YJR124C	20.84945207	43.97524162	-1.076682035	0.181714635	0.769796898
PEX7	21.96760086	0	Inf	0.181803732	0.769796898
FUR1	36.36933256	0	Inf	0.181836344	0.769796898
MHF1	47.08387099	78.27731632	-0.733361359	0.180867845	0.769796898
KRE28	52.13975838	31.72675588	0.716683886	0.18193936	0.769796898
RRP43	70.46126675	46.70888061	0.593133541	0.181421071	0.769796898
YIR035C	189.4536327	151.3353565	0.32409572	0.181528597	0.769796898
YAR1	249.1181595	205.0158093	0.281095027	0.181930348	0.769796898
DOT6	442.2897324	382.4154096	0.209851093	0.181059137	0.769796898
YPT7	164.3142238	224.483398	-0.450151381	0.182945375	0.773069234
OCA5	24.13054124	47.22075508	-0.968560836	0.183540635	0.77329472
FUI1	41.46632073	70.88394669	-0.773518889	0.183354191	0.77329472
FMP33	73.68329322	49.21556092	0.582223006	0.183601079	0.77329472
NCR1	112.9687116	162.787052	-0.5270627	0.183451701	0.77329472
RPN1	234.8488477	192.3080655	0.288313244	0.18359433	0.77329472
PDR11	20.38428526	0	Inf	0.184508951	0.773552967
MRP49	20.84945207	43.94893343	-1.075818684	0.183966818	0.773552967
RRS1	22.02666357	44.71941549	-1.021650348	0.184418626	0.773552967
SPE2	75.90529631	116.3421197	-0.616101036	0.184456758	0.773552967
PMR1	97.50789386	145.6255687	-0.57867276	0.184960681	0.773552967
YLR346C	118.3716404	86.12467901	0.458824874	0.184862583	0.773552967
LYP1	155.8448273	120.7063288	0.36860895	0.185123176	0.773552967
URA2	211.6717789	171.8323546	0.300827226	0.184427827	0.773552967
PPH22	56.25101767	91.03233581	-0.694499902	0.185980292	0.776514446
IMA3	24.65110332	0	Inf	0.186393647	0.777335827
YOL163W	32.68213929	0	Inf	0.186442206	0.777335827
PDR1	42.04594552	71.65976946	-0.769196714	0.186949252	0.777629335
LCB3	79.30084347	54.7777856	0.533745265	0.186925947	0.777629335
MYO2	124.663802	92.26207597	0.434232958	0.186829937	0.777629335
TEF1	4591.930414	4325.445404	0.086252081	0.18756131	0.779687323
DSE2	143.1408692	107.6980424	0.410443618	0.188418045	0.782759215
PKH2	116.0208849	84.23016059	0.461975706	0.188649215	0.78312533
ALT1	189.298074	151.9898487	0.316684762	0.188741805	0.78312533
SOV1	33.01121875	0	Inf	0.189157696	0.783872323
MET28	56.40657644	90.71043042	-0.685405074	0.189715245	0.784802328
CAT8	144.8423102	109.9724233	0.397341294	0.189736323	0.784802328
PMA1	226.0503718	185.389505	0.286084716	0.189536634	0.784802328
DOP1	72.75662704	49.02025113	0.569700787	0.190645836	0.785634731
THG1	88.56815365	132.754164	-0.583897165	0.190086675	0.785634731
ILV1	90.5539059	63.39021397	0.514516733	0.190316067	0.785634731
YCL012C	145.8191947	200.3823112	-0.458574521	0.190291046	0.785634731
PHB1	206.6892487	167.7424555	0.301215467	0.190631548	0.785634731
YDR154C	3714.643783	4325.723112	-0.219717452	0.190646731	0.785634731
VAM6	21.54353484	0	Inf	0.190901701	0.786198021
CMS1	0	36.51849851	#NAME?	0.191090441	0.786488024
ALB1	55.01474346	34.71900247	0.664092802	0.191749078	0.787735553
HTZ1	99.16456666	146.5542953	-0.563538636	0.192030355	0.788403813
SHU1	0	24.49697147	#NAME?	0.192720365	0.78842151
YLL058W	25.48127344	48.72999463	-0.935372685	0.19247381	0.78842151
BIT2	39.12985966	21.40977818	0.870000087	0.192746345	0.78842151
SUL1	112.680733	161.3990673	-0.518391388	0.192711812	0.78842151
CYR1	145.8782574	111.2917694	0.390417969	0.192281812	0.78842151
YBR235W	86.56077203	129.9099515	-0.585726679	0.193609577	0.790979015
NSE1	39.65042174	67.8917001	-0.775899002	0.194749259	0.792218214
VPS54	50.53848086	82.27234437	-0.703025255	0.194978397	0.792218214
YLR036C	56.40657644	35.65306975	0.661837077	0.194601149	0.792218214
PIF1	89.90092392	62.8466906	0.516499166	0.194985557	0.792218214
CAB2	91.5253403	65.09476331	0.491629745	0.194902394	0.792218214
YBL039W-B	93.79756173	138.2637723	-0.559800868	0.194648076	0.792218214
RPL33B	613.0763249	548.3164341	0.161057979	0.194733171	0.792218214
SAP30	29.16846671	54.26057042	-0.895494664	0.196805351	0.792827375
PEX13	32.68213929	58.15523538	-0.831406653	0.196580586	0.792827375
FOL1	38.29968954	65.99184097	-0.784954967	0.195552678	0.792827375
SDP1	47.85497839	28.58160551	0.743582058	0.196901075	0.792827375
SHE3	55.37974677	35.10420566	0.657714574	0.196144251	0.792827375
KXD1	59.92024902	38.73492232	0.629408773	0.196290192	0.792827375
OSH3	85.89894567	60.0814027	0.515721928	0.196814383	0.792827375
PSY1	93.77959981	67.34283602	0.477749644	0.196801296	0.792827375
SBH1	117.8690403	167.1619425	-0.504061602	0.196325624	0.792827375
NRG2	126.5761971	95.15930018	0.411589561	0.196924627	0.792827375
CMK2	133.6215042	100.7161842	0.407856675	0.195411551	0.792827375
SSP120	311.9955952	401.8882633	-0.365268785	0.195676483	0.792827375
RBD2	82.42637388	124.1787253	-0.591240093	0.197177646	0.793365506
RPL8B	539.6667159	477.9862211	0.175099681	0.197348267	0.793562299
SSA1	1440.374002	1305.573974	0.141759262	0.197465329	0.793562299
YGR117C	31.65530962	0	Inf	0.19889631	0.796984647
TIP20	31.67844848	56.28702515	-0.829300724	0.198809383	0.796984647
RSC30	98.93198325	145.9844637	-0.561305936	0.19867695	0.796984647
TOM7	154.4118935	120.2577521	0.360653983	0.198811891	0.796984647
RPL16B	309.1939673	397.9094088	-0.363927842	0.198916433	0.796984647
GCD2	77.0234451	53.11022588	0.536307988	0.199199528	0.79763811
CMP2	50.55644278	81.97674716	-0.697319788	0.199322327	0.797649314
ALG8	20.61686867	42.61890586	-1.047668326	0.199685448	0.798621645
CHS6	0	21.40977818	#NAME?	0.204046069	0.799076736
PET309	0	23.88480958	#NAME?	0.20028704	0.799076736
SWI5	0	28.15933703	#NAME?	0.202626338	0.799076736
UGA4	0	38.83528541	#NAME?	0.203182768	0.799076736
PER1	22.20018426	44.29714701	-0.996642133	0.200082742	0.799076736
ORC1	26.06089823	48.96229403	-0.909784345	0.203060187	0.799076736
YOR389W	27.60311304	0	Inf	0.201412229	0.799076736
GCN20	28.82142532	53.16818297	-0.883421479	0.201043739	0.799076736
CWC15	29.57457081	54.48752911	-0.881568837	0.202347435	0.799076736
DIT1	32.27603519	56.93091161	-0.818748833	0.202295903	0.799076736
PET127	33.26176408	58.70409947	-0.819596568	0.204127019	0.799076736
TEL04R-YP	34.78601696	60.34001029	-0.794607444	0.201807473	0.799076736
YGL015C	36.94895735	63.48516067	-0.780885755	0.20146964	0.799076736
YJL070C	41.21577541	69.59624944	-0.755812924	0.203676663	0.799076736
PSD2	43.35557693	72.45648404	-0.740897218	0.200471388	0.799076736
BET2	51.09496678	31.72675588	0.687481172	0.203886109	0.799076736
RPG1	56.59805905	90.10894996	-0.670917828	0.203464514	0.799076736
PAN2	64.82575457	42.85120526	0.597231311	0.202548851	0.799076736
YHR219W	71.17331145	107.6294039	-0.596664004	0.20065278	0.799076736
PNT1	80.4960169	56.28702515	0.516114996	0.203292363	0.799076736
SCS3	100.1502955	74.06608668	0.43528166	0.201554596	0.799076736
SPR6	122.7154831	91.35958192	0.425689333	0.201124888	0.799076736
YIP5	131.0755985	181.6214357	-0.470535351	0.20396763	0.799076736
ADE2	132.0792893	100.1356712	0.399448268	0.202704278	0.799076736
CKB1	167.4449311	132.8967817	0.333380535	0.203698564	0.799076736
PTC3	191.6847534	155.29866	0.303690208	0.200564464	0.799076736
SYG1	266.8189423	345.2159593	-0.37163807	0.200824261	0.799076736
DCS2	283.3476905	365.4277219	-0.36701264	0.200094583	0.799076736
COA2	405.6929934	350.1767792	0.212304967	0.203564713	0.799076736
ERV25	470.8015497	413.3346181	0.18780887	0.203698324	0.799076736
SIS1	822.3510706	741.4787002	0.149349177	0.201148915	0.799076736
RPB9	31.09882369	0	Inf	0.20538482	0.799383396
PSE1	46.28962472	27.26225936	0.763783736	0.204885611	0.799383396
SWD2	50.53848086	31.3785423	0.687603966	0.205757952	0.799383396
YDL085C-A	51.32755019	82.39359926	-0.682798862	0.205058792	0.799383396
SGV1	59.14914161	93.45475084	-0.659910774	0.205719199	0.799383396
YNL144C	79.41896889	55.61690618	0.513960137	0.205216727	0.799383396
PRO2	102.5637813	76.06096818	0.431293148	0.20553512	0.799383396
SSH1	114.1459231	161.5734096	-0.501310458	0.205416373	0.799383396
THO1	132.6589141	100.5842478	0.399317235	0.205179427	0.799383396
ADH3	205.3975793	168.1276587	0.288862097	0.205768766	0.799383396
SUB1	207.5245958	170.0275178	0.287514079	0.205386677	0.799383396
YIL002W-A	212.0562537	174.0435133	0.284998984	0.204701585	0.799383396
SNC2	393.1354765	338.2608803	0.216890218	0.205691251	0.799383396
UTP10	70.12851985	47.83291697	0.551997505	0.206158109	0.800428125
TPK2	219.1015607	180.5291239	0.279368162	0.206831364	0.802545318
FES1	1119.758628	1020.212383	0.134318267	0.206944889	0.802545318
FMP27	79.59248958	55.87017306	0.510554014	0.207148265	0.802865608
VRP1	23.12685044	44.71407478	-0.95116022	0.207644621	0.803628828
NOP10	190.0691814	251.8669123	-0.406136982	0.207707887	0.803628828
YPK3	0	36.94076699	#NAME?	0.209559294	0.803645086
SCC2	0	37.03037298	#NAME?	0.209481252	0.803645086
DLT1	22.54722565	44.17055141	-0.970134916	0.209666769	0.803645086
TSC11	30.34567821	54.55082691	-0.846110001	0.209767448	0.803645086
NCS2	35.96322846	0	Inf	0.209457748	0.803645086
PLC1	56.62119792	36.7771061	0.62253431	0.209508957	0.803645086
NUP157	63.9724456	42.56094877	0.587920325	0.208942482	0.803645086
TWF1	64.12800437	42.59793838	0.590170902	0.209121903	0.803645086
ADH6	96.03903625	70.69397761	0.442033609	0.207902937	0.803645086
CDC33	218.2698811	287.4883331	-0.397390342	0.209583373	0.803645086
RPN9	279.9701053	360.0661477	-0.362989181	0.209019225	0.803645086
PSA1	672.681789	819.8987099	-0.285521489	0.208366079	0.803645086
HTB1	771.4633904	937.8081019	-0.281695047	0.208589612	0.803645086
YHR050W-A	0	20.38068853	#NAME?	0.210006441	0.803983316
MRPL9	82.87357876	124.1154275	-0.582698323	0.210236131	0.803983316
CRH1	103.5084093	77.05833326	0.425725095	0.210383046	0.803983316
PEX19	279.714383	234.8004514	0.252519258	0.210460504	0.803983316
SAP4	0	20.31739073	#NAME?	0.211282338	0.804396495
MAD3	0	21.99029116	#NAME?	0.211266302	0.804396495
PMS1	23.70647523	0	Inf	0.210994801	0.804396495
CBP3	32.66417736	56.86753814	-0.799896043	0.210697236	0.804396495
NOP13	87.08133411	61.69100534	0.497303353	0.211294762	0.804396495
YDR340W	112.8131529	83.16942203	0.43981017	0.211200556	0.804396495
YML002W	51.13606757	31.95371458	0.678357567	0.211567384	0.804973325
YGR079W	0	27.80578273	#NAME?	0.213822044	0.806638039
PTC4	0	37.90114246	#NAME?	0.212642006	0.806638039
CDC43	0	39.2204886	#NAME?	0.212143866	0.806638039
TIM22	20.19280265	0	Inf	0.213696682	0.806638039
GIP3	24.72812796	46.77217841	-0.919497599	0.213565416	0.806638039
ESC8	32.08455258	0	Inf	0.213927312	0.806638039
YML018C	43.99426443	72.41949443	-0.719062655	0.212662053	0.806638039
RFC2	60.4408111	94.70004208	-0.647842046	0.213369979	0.806638039
YOR131C	78.39731616	55.32130898	0.502968973	0.213946572	0.806638039
NHX1	86.57873396	128.1684126	-0.565956141	0.213213497	0.806638039
LOA1	95.96050211	70.94724449	0.435694054	0.212361311	0.806638039
HAL5	277.4369847	233.0695182	0.251399789	0.213030888	0.806638039
TOF2	317.0746214	270.7067124	0.228091748	0.213639296	0.806638039
YMR230W-A	147.4025103	114.6005807	0.363146739	0.214131499	0.806877593
ARN2	276.935894	355.353725	-0.359703767	0.214526557	0.807677279
SAM2	601.9556824	541.9992784	0.151366345	0.214586742	0.807677279
BZZ1	47.08387099	28.67655221	0.715361357	0.215563886	0.809450946
AFT1	58.1454508	38.15440934	0.60781653	0.215788638	0.809450946
GFD2	76.4849211	53.39514166	0.518466871	0.21543753	0.809450946
RIB4	345.836984	297.5521196	0.216949765	0.215670091	0.809450946
GPM2	73.29515105	50.59820486	0.534631556	0.215943168	0.809573739
HTL1	0	20.8609141	#NAME?	0.219210676	0.809975462
YJL147C	0	22.24889876	#NAME?	0.216775087	0.809975462
IPK1	0	28.38629572	#NAME?	0.218961291	0.809975462
URB2	0	30.60271953	#NAME?	0.218137742	0.809975462
YSP1	20.79038936	0	Inf	0.217878171	0.809975462
RRI1	27.02348825	0	Inf	0.218069359	0.809975462
YBR206W	29.3419874	52.84627757	-0.848835262	0.217088342	0.809975462
YDR018C	35.61618708	60.71987278	-0.769635692	0.218914367	0.809975462
CDC5	36.15471108	20.05878313	0.84994956	0.218493217	0.809975462
DET1	78.95380209	55.55360838	0.50712812	0.216467179	0.809975462
TRM2	93.5470164	68.53551089	0.448839943	0.218310618	0.809975462
MLF3	121.5973343	91.61818951	0.408405643	0.218211651	0.809975462
DOS2	122.6743823	93.00083345	0.399518457	0.219340429	0.809975462
GID8	128.7982002	177.2519615	-0.460689159	0.217191839	0.809975462
PTC2	129.2365607	99.04862443	0.383805418	0.217461551	0.809975462
MRPL31	133.220577	102.0988281	0.383850629	0.217664945	0.809975462
YDR391C	155.9541083	123.7248079	0.333986756	0.218875572	0.809975462
PHO86	157.7161216	212.4248814	-0.429622621	0.217658218	0.809975462
VPS13	163.4466203	130.6541254	0.323066867	0.217085355	0.809975462
YAL044W-A	170.9765656	137.8151956	0.31106363	0.218350051	0.809975462
TUB1	188.559223	154.0163034	0.291934643	0.21726834	0.809975462
KRE9	220.5165326	183.231114	0.267222317	0.219315775	0.809975462
IDH1	258.9471325	333.8436594	-0.366515057	0.21663041	0.809975462
SPT16	287.4912062	242.7056198	0.244310313	0.219026866	0.809975462
RPS23A	1333.706569	1215.586354	0.133788907	0.218436589	0.809975462
SRP21	21.60259755	43.10981285	-0.996811504	0.220092971	0.812303154
RSN1	111.4264968	83.13777313	0.422516331	0.220224571	0.812337804
GCD10	25.48127344	0	Inf	0.220776218	0.813920976
NOP9	0	36.99872408	#NAME?	0.221547376	0.814378754
PAU6	0	37.51593926	#NAME?	0.2216355	0.814378754
MDM10	33.45324669	0	Inf	0.221132002	0.814378754
DCN1	55.44398642	36.06999752	0.620231667	0.221181242	0.814378754
RPN4	407.1116327	506.6048163	-0.315436348	0.221339108	0.814378754
YEL077C	76.07881701	112.6057749	-0.565714098	0.223176373	0.818231304
TCP1	27.2201478	50.05468149	-0.878830106	0.223567268	0.818761229
SEC13	36.19581187	61.20543906	-0.757837088	0.223534525	0.818761229
FAP7	49.76737345	79.43300158	-0.674538272	0.224030847	0.820007181
GEF1	0	20.28574183	#NAME?	0.226828388	0.82037365
GUF1	0	23.11432752	#NAME?	0.228299435	0.82037365
YPL108W	0	24.20671498	#NAME?	0.225325456	0.82037365
KIN4	0	24.49697147	#NAME?	0.225342869	0.82037365
WTM2	0	37.25733167	#NAME?	0.227821145	0.82037365
TRS65	22.20018426	43.36842045	-0.966073248	0.228177317	0.82037365
YJL132W	27.99125521	0	Inf	0.227600925	0.82037365
POM34	34.03287148	58.18688428	-0.773765114	0.226660752	0.82037365
PRO3	40.65411254	67.31652783	-0.727559463	0.226734968	0.82037365
DGK1	44.16778512	72.07128084	-0.706429998	0.226501796	0.82037365
CIN8	45.3270347	27.32555716	0.730120871	0.225960991	0.82037365
SVP26	45.67407609	27.55251585	0.729191487	0.228536416	0.82037365
MRPL40	45.88352063	27.83743163	0.720949983	0.228870974	0.82037365
GPI17	46.67776689	74.54631225	-0.675401442	0.228400047	0.82037365
NHP10	49.22367251	78.4989343	-0.673320769	0.228022096	0.82037365
ECM4	50.55644278	80.26678144	-0.666908092	0.226682092	0.82037365
OCA4	51.35068905	33.10939983	0.633142776	0.225300038	0.82037365
VTA1	56.77157975	37.48429036	0.598882797	0.224622235	0.82037365
PWP1	56.81268053	88.37275172	-0.637388633	0.225314032	0.82037365
MPP10	58.70193673	38.99352991	0.590173341	0.228270056	0.82037365
YNL234W	67.75980236	46.74052951	0.535755589	0.227077771	0.82037365
YBR137W	72.50608172	107.1701458	-0.563729156	0.228944354	0.82037365
MVP1	75.41699065	53.07857698	0.506759891	0.227229972	0.82037365
RAD17	75.82827168	53.33718457	0.507594167	0.22801198	0.82037365
SDO1	87.69688275	62.94697801	0.478388444	0.227687388	0.82037365
YHR097C	93.35553379	134.9496203	-0.53161347	0.226436145	0.82037365
CCT3	103.6639681	78.4989343	0.401169551	0.228607075	0.82037365
SMP3	108.9576158	82.13499167	0.407698156	0.227727528	0.82037365
HUB1	120.0551195	90.62082443	0.405782405	0.225171445	0.82037365
IDI1	168.2340004	135.8783469	0.308153735	0.226326848	0.82037365
YER138W-A	212.5932682	176.8034605	0.265949402	0.22646753	0.82037365
TIF1	221.8209871	184.5610659	0.265297628	0.224377843	0.82037365
RHO5	278.7374985	235.6921127	0.242003621	0.226811531	0.82037365
VMA1	1030.264082	941.8394971	0.129461052	0.228854195	0.82037365
UPS1	102.71934	77.17958815	0.412416588	0.229091176	0.82045746
RIC1	54.22567413	35.81673064	0.59834243	0.229255642	0.820604336
VRG4	36.36933256	60.98382108	-0.745704098	0.229546033	0.820759807
SUR4	97.38459151	73.2902639	0.410071963	0.229519475	0.820759807
YJR084W	55.18826415	36.48684961	0.596984919	0.229887968	0.821540495
GAD1	140.7490128	190.3712167	-0.435690563	0.230175814	0.822127156
GLO3	33.45324669	57.09449683	-0.771205461	0.230342517	0.822233405
RPS9B	809.9082848	736.5183513	0.137037072	0.230452961	0.822233405
AIM34	23.31833305	0	Inf	0.230722027	0.822751778
MAK21	38.89727625	64.55123994	-0.730775673	0.231365787	0.823721684
BEM3	42.23742814	25.58935892	0.722977986	0.23125449	0.823721684
STR3	164.3784634	132.8072514	0.30768737	0.231281913	0.823721684
RPC53	69.47553787	102.4786906	-0.560746943	0.231969194	0.824986212
ERG20	354.3602663	307.3202332	0.205474093	0.231922146	0.824986212
FRE2	26.87310642	0	Inf	0.232898017	0.827404127
FLO8	0	24.14341717	#NAME?	0.233276751	0.82749516
VPS28	0	32.78749444	#NAME?	0.233163228	0.82749516
YPR013C	63.0278175	43.13612104	0.547092257	0.233421608	0.82749516
SPT2	163.0225543	131.5141378	0.309853678	0.233369766	0.82749516
NGL2	46.85128759	29.44703427	0.669966355	0.23364083	0.827830809
ADK2	0	34.49204378	#NAME?	0.234167992	0.828440319
YIL108W	34.26545488	58.18154357	-0.763806733	0.234614324	0.828440319
BAR1	48.79960649	77.08464145	-0.659573928	0.234337751	0.828440319
YGR054W	62.02412669	41.94878689	0.564200427	0.234315777	0.828440319
FSF1	91.21055533	131.6408091	-0.529334104	0.234259288	0.828440319
SRL1	307.4550929	264.0467595	0.219582269	0.23468529	0.828440319
HTB2	347.9767856	302.0165405	0.2043635	0.234497407	0.828440319
FPK1	98.23790048	141.0290602	-0.521640839	0.235055697	0.82930744
MCM22	0	34.20178729	#NAME?	0.235377046	0.829371638
REV7	22.54722565	43.40006935	-0.944747422	0.23546099	0.829371638
MPP6	27.06458903	48.98860222	-0.856039647	0.235542234	0.829371638
TFS1	621.1304997	563.3613099	0.140835924	0.235572988	0.829371638
SUR2	166.5916221	134.9549611	0.303837837	0.235858502	0.829937249
RAD3	0	38.67162452	#NAME?	0.236681381	0.830176087
ERG8	54.99678153	36.19659312	0.603493278	0.236670899	0.830176087
RRP4	82.87357876	60.0814027	0.463993729	0.236631394	0.830176087
GNP1	85.88098375	62.04990034	0.468909824	0.236394763	0.830176087
RRP17	88.64151085	128.6855521	-0.53779571	0.236328199	0.830176087
RPS15	449.3776498	552.3216725	-0.297580366	0.236436514	0.830176087
YJR008W	372.1895284	464.1281328	-0.318485683	0.237110578	0.830386729
YML009W-B	28.22383861	50.60354557	-0.842324255	0.238287761	0.831136307
ALG7	29.16846671	51.98084881	-0.833570642	0.238348516	0.831136307
ICR1	41.42521995	67.75968811	-0.709917877	0.238449968	0.831136307
RXT3	102.3491598	146.427624	-0.516688489	0.237755243	0.831136307
VTC4	112.6216703	84.92658775	0.407196262	0.237861646	0.831136307
UBC7	242.9763797	205.701555	0.240263373	0.238106173	0.831136307
ARC15	271.5329652	345.8071537	-0.348840356	0.238363008	0.831136307
TSA1	7211.175845	6871.718129	0.069563663	0.238090179	0.831136307
TMA46	47.62239499	30.02220655	0.665610163	0.238601274	0.831227814
KRS1	413.473484	363.4172893	0.186167756	0.239238163	0.83300999
YHL008C	58.16341273	89.33312718	-0.619083344	0.239516426	0.833542244
YSW1	23.72443715	0	Inf	0.240190176	0.833545148
ARP5	35.96322846	60.0181049	-0.738875227	0.240269671	0.833545148
PRP9	40.46262993	23.5998938	0.777809725	0.240230002	0.833545148
CYB5	40.80967131	66.64640885	-0.707616049	0.239893757	0.833545148
NFS1	95.94254019	72.58849603	0.402429712	0.239848643	0.833545148
PAC10	32.46751781	0	Inf	0.240863243	0.835168481
RCK1	20.01928195	0	Inf	0.241374147	0.835408825
TID3	35.96322846	20.54434942	0.807780894	0.241554832	0.835408825
MRPL39	38.91523818	64.00237585	-0.717790274	0.24202583	0.835408825
BCP1	40.05652583	65.73857409	-0.714702865	0.241801371	0.835408825
EMI1	95.70995679	136.6541697	-0.513788559	0.241418481	0.835408825
YDL027C	102.180816	146.1373675	-0.516200762	0.241915311	0.835408825
RPT6	180.1668511	236.5049251	-0.392536633	0.241957955	0.835408825
YMR252C	261.4211905	222.2879417	0.233946399	0.241713445	0.835408825
DUR3	0	31.98536348	#NAME?	0.24353795	0.836333296
SEC2	0	32.30726887	#NAME?	0.243788209	0.836333296
KEL2	0	38.38136803	#NAME?	0.243841421	0.836333296
SPT7	24.90164865	45.61649316	-0.87331428	0.243422578	0.836333296
SED4	62.02412669	42.24438409	0.554069953	0.242882153	0.836333296
SNT309	67.85112149	47.57430938	0.512189948	0.243134576	0.836333296
GTO1	72.9532866	51.75923083	0.495156796	0.243730311	0.836333296
SAP155	235.219028	199.0893489	0.240588731	0.24343319	0.836333296
YOR248W	303.7678996	261.2498227	0.217539364	0.24342267	0.836333296
ARG80	27.02348825	0	Inf	0.244383399	0.836896679
MOS2	157.9846288	209.7915298	-0.409172234	0.24425752	0.836896679
RPN2	344.3809114	430.9924247	-0.323657334	0.244548187	0.837029762
LCL3	0	27.23061046	#NAME?	0.244803786	0.837181797
MSM1	24.13054124	0	Inf	0.244844503	0.837181797
DOA4	27.41163042	48.60873974	-0.826427589	0.245065721	0.837228414
UGA3	40.63615062	24.49697147	0.730160343	0.245110049	0.837228414
LRG1	0	35.67937794	#NAME?	0.248414985	0.837533172
CTR9	21.02297276	40.53983475	-0.947373519	0.246080845	0.837533172
YMR087W	24.66906525	44.84601109	-0.862276617	0.24793052	0.837533172
AXL1	26.06089823	47.06243491	-0.852689155	0.245956885	0.837533172
HSL1	29.16846671	51.72758193	-0.826524202	0.246083846	0.837533172
USV1	30.57826161	53.19983187	-0.798915295	0.248475314	0.837533172
MCM4	31.1578864	53.68539815	-0.784932373	0.246794903	0.837533172
SNA4	35.21008298	20.31739073	0.793273492	0.247438508	0.837533172
APM3	48.99108911	76.82603386	-0.649075912	0.247281177	0.837533172
RRT13	54.88232355	36.5872127	0.58500205	0.245836347	0.837533172
SWP82	59.0900789	40.05426847	0.560959931	0.245893086	0.837533172
MET32	138.0849818	107.23886	0.364728632	0.246172911	0.837533172
HRI1	139.4895997	109.1069945	0.354413968	0.247717098	0.837533172
CPA2	198.1967134	257.2445086	-0.376207241	0.246348854	0.837533172
CCT2	226.86258	292.9078644	-0.368628267	0.248423245	0.837533172
YIL047C-A	266.8189423	338.5613472	-0.343556182	0.246895412	0.837533172
YAP1801	331.4337428	416.1368956	-0.328337718	0.246633578	0.837533172
TPS2	405.9681871	501.0688998	-0.303642318	0.246231966	0.837533172
TIF2	555.6286243	503.031981	0.1434708	0.248267032	0.837533172
RPL1B	871.1521865	797.2962568	0.127808878	0.24667213	0.837533172
DUG2	27.2201478	0	Inf	0.248786536	0.837739328
HO	0	22.24355805	#NAME?	0.249847778	0.837813449
PGS1	23.31833305	0	Inf	0.250197036	0.837813449
MTC4	25.07516934	45.38953447	-0.856100247	0.250026302	0.837813449
APC11	35.61618708	20.63929612	0.787139306	0.249793776	0.837813449
VMA16	82.10247135	119.6825798	-0.543715625	0.250153786	0.837813449
CCT4	143.6562543	113.645546	0.338079662	0.249440954	0.837813449
MSP1	148.1736177	118.7222044	0.319698814	0.250135649	0.837813449
CMC1	158.7572457	129.0654903	0.298719136	0.250068402	0.837813449
RPN5	285.0080308	244.2359025	0.22272728	0.249613841	0.837813449
RPL38	470.1717066	573.4040532	-0.286364378	0.249257522	0.837813449
PGA2	229.1399783	294.9767251	-0.364371935	0.250936157	0.839055449
RPL13B	880.2922538	1054.704502	-0.260784376	0.250946627	0.839055449
MRM2	27.02348825	47.90155548	-0.825858592	0.251393455	0.840126846
HAT2	21.38797607	41.05170922	-0.940642323	0.251698406	0.840447947
YSC84	58.33693342	39.73770379	0.553901041	0.25186886	0.840447947
MAS2	58.35489534	39.5740429	0.560299228	0.251849559	0.840447947
NTG1	22.77980905	42.59259767	-0.902847067	0.252049979	0.840630313
TRI1	0	24.62898346	#NAME?	0.252675711	0.840730605
RSC1	27.47069313	48.29217506	-0.813896131	0.252712464	0.840730605
YGR001C	32.91472269	55.2262866	-0.746622081	0.252701877	0.840730605
RDH54	70.57572474	50.27629947	0.489293573	0.252491295	0.840730605
RTT101	20.98187198	40.34452496	-0.943229504	0.252970677	0.841168629
DCD1	0	33.72156172	#NAME?	0.253101691	0.841183471
SNX41	25.48127344	45.64814206	-0.841118763	0.253710893	0.841209635
YBL096C	55.47991026	37.22568277	0.575667144	0.253661766	0.841209635
YJR030C	91.57555864	68.34561748	0.422113766	0.253868892	0.841209635
HHF1	574.1610867	692.0785866	-0.269480311	0.253318652	0.841209635
YBR090C	437.6810499	536.1312461	-0.292706297	0.254416755	0.842342264
RRB1	129.916349	101.8455612	0.35119989	0.254849359	0.843197456
RGD1	0	20.09043204	#NAME?	0.255418208	0.844165425
CDC21	0	27.29390826	#NAME?	0.255307414	0.844165425
YNR048W	0	31.7637455	#NAME?	0.255776917	0.844165425
GYP1	33.85935079	56.70929363	-0.744030875	0.25558392	0.844165425
DYS1	112.9687116	86.2775828	0.388865589	0.255663515	0.844165425
MRPS5	59.14914161	89.68134077	-0.600450615	0.256241682	0.845279634
IFH1	57.75730863	39.18349899	0.559757285	0.256525082	0.845794753
TSL1	82.71801999	119.9465281	-0.536117842	0.256743204	0.846037415
ACK1	78.56565991	114.0570573	-0.537784946	0.257034719	0.84621584
FEN1	56.9682393	86.82644688	-0.607976729	0.25728383	0.846616644
MPH1	25.65479413	46.16535724	-0.847582202	0.257658589	0.847011196
POA1	77.37048649	56.48233494	0.453983615	0.257643203	0.847011196
MVD1	111.9598439	85.76570833	0.384508545	0.257849595	0.847220099
SWI6	29.3419874	0	Inf	0.258478961	0.848124491
YMR144W	29.9806749	0	Inf	0.258941077	0.848124491
TAF6	96.28958158	73.8444687	0.382889848	0.258506129	0.848124491
MRPL7	100.9625037	77.66515443	0.378480229	0.258603321	0.848124491
ARC18	222.5778	286.258593	-0.363009296	0.258771087	0.848124491
MXR1	259.2351112	222.4885922	0.220529767	0.259018011	0.848124491
SSA4	603.0041414	550.558695	0.131271533	0.258656077	0.848124491
TPT1	0	26.45478769	#NAME?	0.259504043	0.848462063
YLR455W	77.79455251	57.02585832	0.448052879	0.259399764	0.848462063
CDC19	1884.590697	1753.390122	0.104104201	0.259428826	0.848462063
FUR4	26.11996094	46.28661213	-0.825442232	0.260078032	0.848653009
LYS14	71.96755771	51.78553902	0.474797415	0.260200817	0.848653009
YER010C	80.53711768	59.21597394	0.443667435	0.260015341	0.848653009
EAF7	226.2649932	192.2340862	0.235149222	0.259895933	0.848653009
ADH4	783.6647483	718.6915431	0.124863892	0.259847444	0.848653009
CTK1	25.30775275	45.32623667	-0.840766976	0.261041907	0.850144809
LEO1	139.4895997	110.0727864	0.341699728	0.261036268	0.850144809
PPH3	0	30.08550435	#NAME?	0.262470418	0.851875423
PDX1	34.09193419	56.22372735	-0.721748648	0.262016529	0.851875423
PRP40	66.71501077	47.2893936	0.49649476	0.262443851	0.851875423
SAS3	70.99979075	50.85681245	0.481373732	0.261869999	0.851875423
UFD4	99.45621277	76.83137457	0.37236593	0.262137255	0.851875423
YAP1	147.0426839	118.4319479	0.312176694	0.262238846	0.851875423
PEX8	34.03287148	0	Inf	0.262651309	0.852046487
POC4	0	21.44142708	#NAME?	0.263833972	0.85214768
YGR016W	22.14112155	0	Inf	0.263947897	0.85214768
FDC1	27.2201478	0	Inf	0.264092707	0.85214768
TFB3	34.61249627	57.28980662	-0.726985475	0.264052868	0.85214768
SFG1	38.47321024	23.05102972	0.739023015	0.263145919	0.85214768
TYE7	203.3490969	171.2411602	0.247929068	0.263819011	0.85214768
APA2	261.7630549	224.7313242	0.220060262	0.263380172	0.85214768
HXK2	275.3257721	236.6159696	0.218592214	0.264092008	0.85214768
LST8	349.5652781	434.1955322	-0.31278299	0.263450451	0.85214768
TDH3	9550.60434	9164.0427	0.059607846	0.263498227	0.85214768
CSM3	0	26.74504418	#NAME?	0.26433642	0.852520224
YGR204C-A	26.29348163	0	Inf	0.264856635	0.852956421
CHA1	67.52721896	48.35013215	0.48194931	0.264680621	0.852956421
YKR040C	148.5437979	120.1048483	0.30659398	0.264776914	0.852956421
KAR2	1186.295215	1098.679668	0.110692261	0.26501733	0.853060627
ARK1	0	26.68174638	#NAME?	0.265298586	0.853139673
AAP1	28.41532123	49.27885872	-0.794299819	0.265246163	0.853139673
ACA1	99.84435494	77.17958815	0.371461517	0.266088559	0.8548529
MET14	166.1121608	136.7228839	0.280902962	0.266014731	0.8548529
PSY2	49.16978674	76.09261708	-0.629984385	0.266439143	0.854915983
OSH7	49.37923128	76.15591488	-0.625051715	0.266494045	0.854915983
ERG4	115.0314885	88.75795491	0.374080505	0.266275356	0.854915983
AIM4	40.05652583	24.17506608	0.728517466	0.267746268	0.858104843
MOD5	50.55644278	33.9115308	0.576119047	0.267716359	0.858104843
SMC3	21.37001415	0	Inf	0.26795448	0.858358278
IPP1	862.7509703	1029.616185	-0.255090541	0.268880045	0.860908314
BNA1	159.2583364	131.0602961	0.281138196	0.269064901	0.861080754
RPN7	198.502654	167.4258908	0.245635652	0.26919299	0.861080754
GGA1	82.35301668	118.5268946	-0.52532105	0.269695073	0.861925935
TPM1	367.1196197	323.1360622	0.184108452	0.269716555	0.861925935
TRS20	0	23.30963731	#NAME?	0.270024467	0.862101646
YHR045W	44.70630913	28.35464682	0.656893258	0.270087835	0.862101646
SAH1	1482.978216	1373.914099	0.1102056	0.270160633	0.862101646
SXM1	72.20014112	52.33974381	0.464094794	0.271016207	0.863588078
RPL27B	531.5699308	638.657061	-0.264781959	0.270762916	0.863588078
URA3	1379.652172	1635.929063	-0.245805601	0.270886527	0.863588078
PTK1	0	27.55251585	#NAME?	0.271427971	0.864485731
MPC54	0	21.70003467	#NAME?	0.271602121	0.864626101
YIL067C	71.32887022	51.72224122	0.463701332	0.271866468	0.865053333
NMD4	23.55091646	0	Inf	0.27203527	0.865176287
YNL303W	0	22.82407103	#NAME?	0.272471154	0.866128161
JAC1	77.31509121	56.99955013	0.43979951	0.272595173	0.866128161
SPO71	51.17716836	35.10420566	0.543856442	0.272937045	0.866800067
NET1	65.34631665	46.70888061	0.484409047	0.273342425	0.867258758
MSO1	158.911295	131.091945	0.27764263	0.273313764	0.867258758
PSH1	27.00552633	0	Inf	0.274090723	0.868369849
BAP3	69.22499254	99.62913741	-0.52527474	0.274215182	0.868369849
URM1	71.57941554	102.800596	-0.522231959	0.274082473	0.868369849
COX12	483.6020039	436.2643929	0.148617494	0.274086591	0.868369849
YOL107W	32.06141371	0	Inf	0.274506137	0.868463727
MDJ1	317.5720446	278.364106	0.190110727	0.274475157	0.868463727
DCP1	61.2119185	91.52324281	-0.580325584	0.274804135	0.868992904
STE7	22.54722565	41.9857765	-0.896950743	0.275086461	0.869472042
RGA1	53.87863274	37.09901149	0.538332494	0.275559599	0.869726806
URA5	168.4075211	139.7097141	0.269524236	0.275352661	0.869726806
YUR1	36.38729448	21.99029116	0.72656808	0.276745214	0.871900097
SAS4	39.43580026	23.91645848	0.721502146	0.277027939	0.871900097
EMW1	40.07448776	63.52215028	-0.66457567	0.276421091	0.871900097
NSR1	69.03350992	50.02303259	0.464704316	0.277166376	0.871900097
MOG1	103.372322	144.4011693	-0.482232469	0.27709666	0.871900097
KGD2	418.8298619	373.7396834	0.164330552	0.276919807	0.871900097
DOG2	90.63093054	68.69917178	0.399710791	0.278095193	0.874346258
UIP3	122.4649378	96.59990121	0.34227514	0.278338601	0.874346258
VPS36	0	23.65785089	#NAME?	0.278802458	0.875225277
RKM4	0	24.17506608	#NAME?	0.279694536	0.875225277
SPT8	0	26.68174638	#NAME?	0.280066822	0.875225277
AIM25	20.21076457	38.38136803	-0.925282235	0.2797816	0.875225277
SLX1	26.46700232	0	Inf	0.280042002	0.875225277
STB3	29.92161219	50.85147174	-0.765101619	0.279147519	0.875225277
SAM37	41.98688281	26.90870507	0.641865718	0.279950915	0.875225277
YAL037C-A	65.01723719	46.70888061	0.477125381	0.279846296	0.875225277
NRG1	71.57941554	102.4153928	-0.516815896	0.279234051	0.875225277
ZRG17	72.56514443	103.5184617	-0.51253944	0.279707116	0.875225277
ENV10	76.23437577	108.5581305	-0.509954188	0.279489424	0.875225277
UPF3	35.78970777	21.63673687	0.726061827	0.280622068	0.875790262
FRT1	54.99678153	82.39359926	-0.583185073	0.280908315	0.875790262
PAN5	80.43695419	60.0814027	0.420939958	0.280799049	0.875790262
YDL233W	108.3137514	84.38306438	0.360191033	0.281019613	0.875790262
UIP4	128.3509953	102.4786906	0.324770536	0.281403548	0.875790262
PLB1	263.0547244	227.3382919	0.210522255	0.280602784	0.875790262
ICY2	550.3115645	502.6892595	0.130581782	0.281267918	0.875790262
TAF5	26.64052302	46.45027302	-0.80206467	0.281731624	0.875898083
CUP1-2	23341.38651	23046.4924	0.018343068	0.281649868	0.875898083
YPK9	73.10366843	103.8613345	-0.506642959	0.282358969	0.877028069
ERG10	109.4498621	150.153363	-0.456166651	0.282288756	0.877028069
YOR1	63.39282081	93.64471991	-0.562878186	0.283075109	0.877612056
PTH2	133.5624414	106.3841126	0.328231655	0.283207148	0.877612081
MDV1	40.65411254	64.32428125	-0.66196213	0.283448677	0.877904376
YNR029C	47.0427702	31.11993471	0.596133985	0.283948988	0.878273113
SUA7	174.6046962	146.0424208	0.257704874	0.283829294	0.878273113
NOB1	76.36161874	56.70929363	0.4292625	0.284415827	0.878490706
DBP9	29.7480915	50.34493798	-0.759049613	0.284981109	0.879176277
YOL159C-A	48.97312719	33.14104873	0.563371066	0.285024015	0.879176277
CUP1-1	23523.70934	23242.13566	0.01737293	0.285034584	0.879176277
AYT1	0	28.12768813	#NAME?	0.28556686	0.879593568
DAD2	32.3350979	0	Inf	0.285334374	0.879593568
YNK1	744.9072269	688.4001989	0.113813245	0.285486951	0.879593568
BSP1	0	30.57107063	#NAME?	0.286245304	0.880084412
STO1	33.279726	54.32920893	-0.707084485	0.286388233	0.880084412
ALR2	38.89727625	23.94810738	0.699757491	0.286054619	0.880084412
IMP2	54.24363605	37.57389636	0.529723159	0.286380498	0.880084412
HCA4	52.48679976	36.39190291	0.528337145	0.286522235	0.880089324
SOM1	79.88046826	60.11839231	0.410036361	0.286654958	0.880090304
YNL247W	33.26176408	54.00730354	-0.699289834	0.286788638	0.880094217
YHL017W	21.19649345	0	Inf	0.287550889	0.88041149
TEM1	24.13054124	42.62958728	-0.820994813	0.287554287	0.88041149
CCL1	65.11373325	95.15395946	-0.547301833	0.287120867	0.88041149
YJL185C	72.97124852	103.5077802	-0.50433917	0.287382828	0.88041149
WSC3	27.83569644	47.63760718	-0.77516477	0.287732794	0.880552432
KAP114	0	20.38068853	#NAME?	0.290571082	0.881349925
TOS6	0	21.70003467	#NAME?	0.291015653	0.881349925
CBT1	0	33.72156172	#NAME?	0.291962444	0.881349925
SEC10	0	33.72156172	#NAME?	0.291962444	0.881349925
SKO1	0	35.00925896	#NAME?	0.291746119	0.881349925
GEA2	23.31833305	42.0174254	-0.849523105	0.292236382	0.881349925
YBR076C-A	24.71016603	43.36842045	-0.811540194	0.289849731	0.881349925
RKR1	25.48127344	43.97524162	-0.787254126	0.292226036	0.881349925
DBR1	25.88737753	44.87765999	-0.79374863	0.291409537	0.881349925
SPT5	28.22383861	48.09686527	-0.769028652	0.29050144	0.881349925
ESP1	32.1025145	0	Inf	0.288870578	0.881349925
SDT1	33.85935079	55.0680421	-0.701661004	0.288484814	0.881349925
NKP1	36.54285325	22.79242213	0.681035037	0.291909357	0.881349925
SLC1	38.31765147	60.7305542	-0.664413395	0.288634833	0.881349925
DMC1	39.70948445	62.10785743	-0.645292169	0.292022084	0.881349925
MRM1	44.93889253	29.22541629	0.620740996	0.291928088	0.881349925
POB3	60.86487711	90.42017393	-0.571034751	0.28938301	0.881349925
IOC2	65.55576119	47.61129899	0.461418583	0.292016027	0.881349925
YOR262W	77.40641034	109.6875075	-0.502874273	0.289574324	0.881349925
REH1	89.59131588	68.40357457	0.38928718	0.290977335	0.881349925
BSD2	112.6037083	87.95048324	0.35649093	0.289229368	0.881349925
CSG2	115.1136901	89.91898088	0.356361829	0.288986532	0.881349925
ERP5	116.8473875	158.0902561	-0.436122971	0.289542484	0.881349925
DPL1	134.3566877	107.1809029	0.32602026	0.291825798	0.881349925
UTR4	168.7545625	140.8917075	0.260339807	0.290045732	0.881349925
PRE1	246.0748307	213.13199	0.207349952	0.28905901	0.881349925
GLC8	257.8664171	223.8819176	0.203885888	0.290007002	0.881349925
MET6	442.2641625	398.7327512	0.149486232	0.289646492	0.881349925
ACE2	21.79408017	39.50540439	-0.858113714	0.292660278	0.881428577
SDC1	35.61618708	57.22650882	-0.68415052	0.292591358	0.881428577
YNL211C	39.53596375	62.10785743	-0.651610206	0.292431757	0.881428577
NMA2	40.84559516	64.26098344	-0.653762555	0.292942939	0.881602592
GDA1	123.0625245	164.2066855	-0.416121373	0.293115951	0.881602592
HTA2	286.0208391	355.5436184	-0.313906298	0.293079183	0.881602592
IRE1	22.37370496	0	Inf	0.293850788	0.882509375
SKI6	49.76737345	33.9115308	0.553424338	0.29408128	0.882509375
MED7	54.12917807	37.64253487	0.524042698	0.293992529	0.882509375
YPR109W	81.23120045	61.46404665	0.402291211	0.293603387	0.882509375
UGA2	460.986598	417.4772092	0.143027368	0.294005662	0.882509375
PSR1	27.58515111	0	Inf	0.294441582	0.883027647
SCM4	0	28.92981909	#NAME?	0.295284514	0.883606824
YKU80	20.84945207	38.22304785	-0.874433352	0.295298726	0.883606824
LYS20	149.2826489	194.6828095	-0.383079008	0.295136886	0.883606824
GRX4	38.31765147	60.37165919	-0.655862312	0.295738853	0.88428977
RPL8A	82.93264147	117.6244762	-0.504176349	0.295985825	0.884630297
LIF1	26.23441892	0	Inf	0.297288174	0.887081313
RRD2	28.41532123	48.15482236	-0.761011256	0.297339727	0.887081313
YAL026C-A	45.8655587	30.63436843	0.582260105	0.29713065	0.887081313
GLK1	1601.24791	1880.481926	-0.231905752	0.297069826	0.887081313
SOK2	39.07079695	24.17506608	0.69257085	0.297727013	0.887838248
CET1	21.19649345	39.02517881	-0.880579624	0.298383419	0.888201785
MPT5	39.30338035	24.52862037	0.680187308	0.298215707	0.888201785
TMA22	152.7320819	126.3318513	0.273784714	0.298172532	0.888201785
PGI1	1154.435637	1077.856215	0.099023006	0.29826373	0.888201785
YGR130C	200.3365149	254.2523377	-0.343835637	0.298605767	0.888465772
YBR141C	21.02297276	0	Inf	0.298933136	0.889031388
SRL2	25.07516934	43.43171825	-0.792489586	0.300090412	0.889031388
TRE1	42.81705293	65.93388388	-0.622834568	0.299784339	0.889031388
RUP1	48.79960649	73.23230681	-0.585610727	0.299922949	0.889031388
DPH5	56.17399304	82.84751664	-0.560556095	0.299701779	0.889031388
SDS22	104.1059961	82.45689706	0.336341087	0.300033283	0.889031388
RPC10	171.8441691	144.628128	0.248752738	0.299544534	0.889031388
RPM2	200.9213167	171.536833	0.228112244	0.299200438	0.889031388
HIS3	220.6294811	190.3765574	0.212769741	0.300133359	0.889031388
RPS4B	1331.650479	1569.224773	-0.236836551	0.299512405	0.889031388
RRT2	25.05720742	43.36842045	-0.791419261	0.300743748	0.890197145
RGP1	44.57388922	68.31396858	-0.615981759	0.300794763	0.890197145
MBB1	36.25487458	57.6063713	-0.668053401	0.300986328	0.890367655
OTU1	32.46751781	20.05878313	0.694763005	0.301796337	0.891969877
HDA2	38.29968954	24.14341717	0.665702813	0.301764783	0.891969877
YJR120W	95.15347086	74.86821764	0.345902873	0.302007038	0.892028685
YCP4	207.9614468	263.1549469	-0.339596418	0.302084635	0.892028685
YBP1	22.73870827	0	Inf	0.303127693	0.893520965
SCO2	61.67708531	44.51876499	0.470321018	0.30292271	0.893520965
RAD4	113.5251976	153.1138851	-0.431592571	0.302932924	0.893520965
PBP1	145.3628723	189.2788293	-0.380854224	0.30308487	0.893520965
RMI1	0	32.01167167	#NAME?	0.303425068	0.893914076
IML3	20.44334797	0	Inf	0.303530024	0.893914076
RRP40	40.01542505	25.58935892	0.645012229	0.303850821	0.893966079
EAF5	265.0441441	231.422926	0.195700874	0.303755347	0.893966079
RRG7	0	35.65306975	#NAME?	0.304233258	0.894049391
YPR084W	39.66838366	25.33075133	0.647099745	0.304248491	0.894049391
SRO7	34.03287148	54.29221932	-0.673816577	0.304522783	0.894459983
WHI3	47.85497839	72.30358025	-0.595398069	0.305102609	0.895767244
YMR196W	196.6544986	249.5292336	-0.343545655	0.305565399	0.896729894
PRE6	161.4803395	208.2398842	-0.36688789	0.305736602	0.89683636
RPS2	703.2959744	833.3929579	-0.24486495	0.306436047	0.89819596
STD1	0	21.73168357	#NAME?	0.309019132	0.899328638
MLP2	24.72812796	42.59259767	-0.784449696	0.307846798	0.899328638
GUP1	31.75547311	51.75923083	-0.704810914	0.308315253	0.899328638
[truncated: 2,949 more rows]
