# Supplementary material for: Temporal profiling of redox-dependent heterogeneity in single cells
Source: eLife journal article supplement (doi:10.7554/elife.37623), 2018-06-05
Supplement: supp [file elife-37623-supp-v1.zip › elife_poa_e37623_Supplementary_File_7.csv]

Row	Oxidized_72h	Reduced_72h	log_FoldChange	Pvalue	FDR_adjusted
HSP26	27689.782	8948.052505	1.629708068	8.42E-57	5.60E-53
YLR307C-A	1409.335003	5596.444613	-1.989495997	6.45E-40	2.14E-36
MDH2	2214.6899	7544.668702	-1.768352844	1.75E-35	3.87E-32
ADH2	1181.913924	4261.165949	-1.850123266	3.38E-29	5.62E-26
ICL1	1263.064135	4428.89667	-1.810019441	4.47E-29	5.94E-26
MLS1	815.8550476	2947.211943	-1.852966055	5.20E-27	5.76E-24
SFC1	391.4989487	1332.696771	-1.767268222	1.10E-26	1.05E-23
RGI2	188.6223465	925.5372167	-2.294790398	1.15E-25	9.58E-23
HSP30	5007.801477	1423.78154	1.81444957	1.14E-24	8.43E-22
HXT6	3783.423794	960.8081526	1.977372089	1.03E-23	6.83E-21
DDR2	2851.690577	7654.028786	-1.424401876	2.05E-23	1.24E-20
ADY2	924.0328363	3036.928154	-1.716596754	5.55E-23	3.07E-20
HXT5	574.4467608	1630.23152	-1.504831769	1.10E-22	5.60E-20
FMP16	858.9129858	2721.014664	-1.663560843	5.70E-22	2.71E-19
PCK1	867.3893504	2737.593058	-1.658156371	8.00E-22	3.54E-19
CPR6	1634.62894	575.9797015	1.504873307	2.92E-21	1.21E-18
THI12	600.7325353	145.1407558	2.049270113	5.33E-21	2.09E-18
FBP1	269.6032412	1007.957624	-1.902525241	1.29E-20	4.76E-18
SPS100	449.8050957	1294.729363	-1.525278653	2.68E-20	9.36E-18
MEP2	179.0790172	732.89488	-2.03300998	1.13E-19	3.76E-17
CUP1-2	20762.23406	11633.82291	0.83563644	4.64E-19	1.45E-16
CYC7	368.6136457	67.20403067	2.45548981	4.81E-19	1.45E-16
RPL41B	3780.255666	8832.136377	-1.224278639	7.41E-19	2.06E-16
SPI1	3862.023071	1236.09841	1.643563177	7.43E-19	2.06E-16
CUP1-1	20557.52138	11551.62307	0.831570756	8.10E-19	2.15E-16
OM14	1001.365307	2904.141149	-1.536143195	1.59E-18	4.07E-16
IDP2	172.9860519	679.1121706	-1.972994171	1.99E-18	4.90E-16
THI11	621.4402608	173.4439405	1.841146272	3.79E-18	9.00E-16
CAT2	320.1549241	1036.589748	-1.695002926	1.07E-17	2.36E-15
SSE2	623.5831149	177.8984884	1.809527612	1.06E-17	2.36E-15
ACS1	373.7186375	1116.223003	-1.578600865	1.70E-17	3.66E-15
YGR067C	144.27591	558.7196679	-1.953294176	3.10E-17	6.44E-15
PAI3	504.3944506	1308.098675	-1.374847065	6.31E-17	1.23E-14
HSP82	3723.301923	1281.917389	1.538279316	6.28E-17	1.23E-14
SIT1	271.4491415	915.9563131	-1.754596869	1.66E-16	3.14E-14
RGI1	2075.103851	806.175696	1.364017344	2.83E-16	5.22E-14
BTN2	1076.865265	391.7997891	1.458649228	3.47E-16	6.24E-14
NCE103	923.3174515	2429.461963	-1.395738185	6.41E-16	1.12E-13
FIT2	1483.532184	627.1165516	1.242230723	7.86E-16	1.34E-13
DAL3	92.48919255	412.5927795	-2.157361874	2.38E-15	3.96E-13
SPG1	912.0805799	2332.323726	-1.354534855	2.50E-15	3.96E-13
PIN3	524.0785882	158.156763	1.728427918	2.47E-15	3.96E-13
SSA3	1759.823816	744.8763185	1.2403582	4.68E-15	7.23E-13
HXK1	1951.049578	805.3825694	1.276504285	7.85E-15	1.19E-12
HSP42	1944.901987	803.8953652	1.274617814	8.53E-15	1.26E-12
PDC5	350.4905951	81.24723252	2.108985155	9.04E-15	1.31E-12
OLE1	551.1275864	1324.507609	-1.264997884	1.20E-14	1.70E-12
YFR052C-A	1831.415793	774.0555591	1.242450342	1.24E-14	1.72E-12
HXT7	1223.304203	517.6208298	1.240815628	1.37E-14	1.86E-12
FES1	1038.646246	397.6288729	1.385209944	1.79E-14	2.39E-12
HSP10	2192.333443	899.4358923	1.28537488	2.24E-14	2.92E-12
YLR271W	435.0543091	130.9747441	1.731906865	4.32E-14	5.52E-12
MDH3	691.7161582	1569.964924	-1.182480265	4.90E-14	6.15E-12
YHR052W-A	448.2415999	140.8441158	1.670177255	1.11E-13	1.37E-11
FMP43	442.8351919	1109.393858	-1.324929862	2.29E-13	2.77E-11
YRO2	969.4361505	372.22074	1.380987438	2.60E-13	3.09E-11
YBR072C-A	921.5348309	347.3294888	1.407733793	4.41E-13	5.14E-11
GAP1	129.212729	453.8227687	-1.812380792	5.14E-13	5.88E-11
ATO3	145.9338377	481.9650634	-1.723614132	6.17E-13	6.95E-11
SHH3	147.0064271	482.9830167	-1.716093229	6.88E-13	7.62E-11
THI13	432.2893398	141.1596363	1.614669642	8.93E-13	9.73E-11
YNR034W-A	2153.322457	947.6946015	1.184070252	1.10E-12	1.18E-10
HOR7	8229.396174	4315.604937	0.931223775	1.59E-12	1.68E-10
ICL2	156.5497565	493.9084219	-1.657622304	1.78E-12	1.84E-10
YJR096W	1150.865277	532.0143549	1.11318188	3.09E-12	3.16E-10
YGP1	1675.644972	798.5400053	1.069279919	3.21E-12	3.24E-10
YAR1	412.4273166	136.1317248	1.599136572	3.54E-12	3.51E-10
SSA4	861.1339401	331.130257	1.378838808	3.72E-12	3.64E-10
PHD1	417.8180129	142.978762	1.547073826	9.42E-12	9.07E-10
HAP4	526.9460228	195.5373885	1.430210698	9.60E-12	9.11E-10
HSP104	2259.608643	1027.445979	1.137010382	1.74E-11	1.63E-09
YOR338W	648.2721878	255.7061443	1.342112852	1.90E-11	1.75E-09
THI5	434.4912824	155.488029	1.48252372	2.20E-11	2.00E-09
RTN2	160.268247	476.3028335	-1.57139051	3.75E-11	3.36E-09
NCA2	323.9325031	94.45893235	1.7779341	4.66E-11	4.13E-09
YDR034W-B	130.7726537	420.87203	-1.68632075	6.31E-11	5.52E-09
ZPR1	359.3274644	118.2986232	1.602865926	7.74E-11	6.68E-09
PXA1	32.15604372	186.4022702	-2.535257609	8.18E-11	6.97E-09
MCH5	243.3765553	63.83137286	1.930852616	1.15E-10	9.67E-09
SHM2	635.1026622	261.5337372	1.279992755	1.29E-10	1.07E-08
ECI1	165.8961887	476.2968696	-1.521580325	1.31E-10	1.07E-08
CRC1	254.4153673	685.0822516	-1.429091394	1.60E-10	1.29E-08
AHA1	399.1663879	145.3608142	1.457351837	1.70E-10	1.36E-08
NDI1	460.1038866	180.7688791	1.347813317	2.12E-10	1.68E-08
ENA2	126.2886146	400.0745666	-1.663544336	2.33E-10	1.82E-08
NCA3	365.5817124	130.5271724	1.485843734	3.06E-10	2.36E-08
PEX11	148.5274373	438.0696177	-1.560430697	4.06E-10	3.10E-08
QCR7	2099.168756	1035.980091	1.018821874	4.30E-10	3.25E-08
ZRT1	2432.832561	1172.06448	1.05358509	4.39E-10	3.25E-08
STI1	814.7325654	346.7243045	1.232537606	4.39E-10	3.25E-08
NDE2	215.4664141	572.3911628	-1.409538392	4.66E-10	3.40E-08
TAH11	438.1708584	172.711178	1.34313208	4.79E-10	3.46E-08
SUC2	230.8057549	64.27745359	1.844294515	5.59E-10	4.00E-08
CYT1	279.5370651	88.37647845	1.661305239	9.29E-10	6.57E-08
YAT2	336.6702109	840.9827542	-1.320740141	9.56E-10	6.69E-08
FIT3	2588.46906	1261.628157	1.03681231	1.10E-09	7.60E-08
MUM3	816.5917687	356.8530103	1.194285083	1.11E-09	7.64E-08
YHR054W-A	311.1045547	102.0024383	1.608795877	1.98E-09	1.34E-07
QCR2	412.8721662	165.6122618	1.31788567	2.16E-09	1.45E-07
LSP1	674.040366	1325.36795	-0.97548604	2.99E-09	1.99E-07
YPL251W	144.1770158	29.6747386	2.280533967	3.61E-09	2.38E-07
BDH2	784.7327628	351.2529308	1.159691171	4.31E-09	2.79E-07
GID8	261.0867997	85.31934114	1.613584788	4.32E-09	2.79E-07
SGT2	952.6206099	468.0116551	1.025357303	4.65E-09	2.97E-07
QCR10	363.7159092	143.2927915	1.343845997	5.24E-09	3.32E-07
MTH1	332.5122243	121.8033322	1.448853779	6.37E-09	3.99E-07
YJL144W	989.9360006	506.6059266	0.966471303	6.97E-09	4.33E-07
YLR312C	189.0363151	483.1757274	-1.35388457	7.26E-09	4.47E-07
HAP1	619.6122098	282.5134743	1.133045896	7.70E-09	4.70E-07
ENA1	134.5089935	381.3222511	-1.503308081	1.41E-08	8.51E-07
TMA10	5504.23189	3182.223031	0.790506298	1.75E-08	1.05E-06
COX26	218.175866	531.1266664	-1.283564441	2.06E-08	1.22E-06
REE1	268.3981965	94.20258028	1.510536496	2.16E-08	1.27E-06
YCL021W-A	463.6364581	206.9344357	1.163820275	2.29E-08	1.33E-06
SFA1	431.4459622	191.3362106	1.173069944	2.57E-08	1.49E-06
YDR524C-A	1130.916313	629.6475658	0.844875739	2.66E-08	1.51E-06
SPT15	409.8491575	177.6466094	1.206082879	2.66E-08	1.51E-06
ERG25	332.5834534	777.8523231	-1.225779889	3.03E-08	1.71E-06
DOT6	573.8982835	269.7115615	1.089377694	3.08E-08	1.72E-06
REG2	197.3612128	483.6307541	-1.293067502	3.46E-08	1.92E-06
UTH1	1472.455704	852.7256376	0.788070697	3.85E-08	2.11E-06
GRE1	1399.81961	2823.41108	-1.012198272	4.20E-08	2.29E-06
PHO4	465.5292223	212.2294316	1.133246991	4.45E-08	2.41E-06
POX1	150.0229199	400.1519223	-1.415364913	4.74E-08	2.54E-06
SSC1	990.5601693	537.4235101	0.882185176	5.32E-08	2.83E-06
COX5A	741.4589158	354.6211156	1.064088312	5.39E-08	2.84E-06
MSC1	752.163913	1385.160821	-0.880934491	6.87E-08	3.60E-06
HPF1	136.1446095	32.75773264	2.055232454	7.29E-08	3.78E-06
MDJ1	409.6032587	183.9854153	1.154635786	7.59E-08	3.91E-06
ATP4	1241.034621	720.8052322	0.783861974	7.87E-08	4.02E-06
POT1	106.9159802	315.0178369	-1.558956017	7.97E-08	4.04E-06
AHC2	153.3898303	399.9045162	-1.382452738	8.73E-08	4.39E-06
FTR1	269.3861699	622.1944582	-1.207689759	9.21E-08	4.60E-06
SHH4	36.68345962	156.3450923	-2.091532323	1.04E-07	5.15E-06
YLL056C	371.6892269	163.1240151	1.188127683	1.15E-07	5.65E-06
HRK1	269.8158501	101.5548666	1.409715725	1.16E-07	5.65E-06
APJ1	354.4039293	153.8934347	1.203462913	1.17E-07	5.67E-06
PHM7	150.8962874	391.748371	-1.376369965	1.29E-07	6.23E-06
CDA1	40.09044693	168.1852383	-2.068720679	1.34E-07	6.39E-06
HSP78	607.215995	300.0236005	1.017133803	1.47E-07	6.98E-06
COX13	916.0951331	486.8383444	0.912054622	1.59E-07	7.49E-06
COT1	214.4395262	495.9050528	-1.209493072	2.09E-07	9.76E-06
MDH1	893.4479665	473.5053257	0.916003058	2.27E-07	1.06E-05
YLR294C	515.6147193	253.224157	1.025878408	2.46E-07	1.14E-05
SSE1	846.2074055	442.3605891	0.935788453	3.11E-07	1.43E-05
URA10	520.1376729	258.6996402	1.007615486	3.70E-07	1.68E-05
ATP16	545.9926047	274.0444952	0.994471255	3.90E-07	1.77E-05
LST8	496.3255386	245.9081644	1.013167056	3.96E-07	1.78E-05
SPG4	1318.607366	2515.360712	-0.931750257	4.03E-07	1.80E-05
PHO84	290.6548685	116.1381203	1.323465485	4.13E-07	1.83E-05
GIS3	138.504535	36.99371319	1.904581193	4.18E-07	1.84E-05
FAA2	111.1318929	306.2910147	-1.46263014	4.41E-07	1.93E-05
ATP14	841.8326188	444.6225181	0.920952395	4.71E-07	2.04E-05
SCW4	777.505982	399.9823818	0.958917321	4.79E-07	2.07E-05
MEX67	205.8675673	74.49565753	1.466488328	5.28E-07	2.26E-05
SIS1	870.726271	468.1998928	0.895094648	5.40E-07	2.30E-05
CTA1	111.4134063	303.3989449	-1.445293227	6.07E-07	2.57E-05
RVS161	383.2575046	181.4350182	1.078861109	7.03E-07	2.96E-05
JEN1	280.6574937	611.6625202	-1.123925297	7.51E-07	3.14E-05
DDR48	1063.334072	638.0906882	0.73676154	8.23E-07	3.42E-05
HBT1	268.724249	584.6048021	-1.121335167	9.03E-07	3.73E-05
CRS5	1492.950821	921.3045135	0.696416657	9.67E-07	3.97E-05
RPL40B	26.93760829	128.1406472	-2.250034513	9.97E-07	4.07E-05
YLR302C	197.4146767	72.99980278	1.435264779	1.13E-06	4.58E-05
UBC4	1442.552658	901.1131206	0.678843853	1.25E-06	5.02E-05
LSB1	625.860749	329.3783456	0.926095989	1.27E-06	5.07E-05
YBR201C-A	114.1739132	28.49291336	2.002558009	1.29E-06	5.14E-05
YMR173W-A	1041.126402	630.0677898	0.724566271	1.38E-06	5.47E-05
RIP1	430.8327717	217.4045187	0.986746067	1.39E-06	5.48E-05
MPM1	473.417924	241.8283054	0.96913121	1.41E-06	5.50E-05
CEM1	142.5680896	42.18251463	1.7569341	1.45E-06	5.65E-05
YJL133C-A	723.2167969	381.1084521	0.924226581	1.47E-06	5.68E-05
PDH1	102.4764803	273.0568716	-1.413908633	1.55E-06	5.97E-05
YER158C	234.458641	93.5637889	1.32531126	1.57E-06	6.00E-05
BIO5	215.0070152	470.8895007	-1.131004823	1.63E-06	6.18E-05
MIR1	905.2366154	516.8286035	0.808609024	1.80E-06	6.80E-05
GIR2	329.3032966	150.2644248	1.131913464	1.81E-06	6.80E-05
FMP23	0	95.72876474	#NAME?	2.04E-06	7.63E-05
YLR311C	75.37196464	228.0384736	-1.597177346	2.10E-06	7.79E-05
ALP1	48.75032186	170.0742647	-1.802681203	2.21E-06	8.16E-05
CPA1	1411.667264	895.9603174	0.655893338	2.36E-06	8.66E-05
ATP18	1921.513017	1166.669349	0.719847012	2.68E-06	9.80E-05
QCR6	703.062011	377.4503081	0.897365219	2.72E-06	9.86E-05
YGR137W	616.6378474	332.4658126	0.891217444	2.81E-06	0.00010143
APA2	365.8287735	180.4792153	1.019335852	3.30E-06	0.000118487
SIP4	54.80321023	179.301863	-1.710058169	3.32E-06	0.000118655
HSP60	469.0874053	246.2221939	0.929895957	3.43E-06	0.000121811
SNA2	187.7778066	414.8535129	-1.143575441	3.67E-06	0.000129612
ETR1	337.1153316	693.9411249	-1.041571026	3.75E-06	0.000131933
YNL144C	179.0733925	65.2939159	1.455530519	4.24E-06	0.000148408
YNR014W	241.4216737	103.6258713	1.220170969	4.85E-06	0.00016797
CSE2	112.4949203	30.37120742	1.889083689	4.83E-06	0.00016797
BLM10	149.8993893	353.4452544	-1.237492265	5.34E-06	0.000183033
BDH1	447.7186501	236.8307236	0.918736165	5.33E-06	0.000183033
COR1	856.3140326	494.4850628	0.792213026	5.61E-06	0.000191126
YDL129W	45.94081337	0	Inf	5.83E-06	0.000197554
CLG1	249.0134215	109.0377131	1.191396295	6.00E-06	0.000202292
FAS1	869.8448701	1469.889807	-0.756877969	6.26E-06	0.000210056
OTU1	37.20194706	0	Inf	6.29E-06	0.000210056
FAA1	402.8638132	210.8747885	0.933905601	6.33E-06	0.000210459
YIL047C-A	465.980943	250.0424235	0.898098064	6.45E-06	0.000213305
OXR1	274.6681562	123.3036599	1.155474038	6.88E-06	0.000225225
VIP1	217.1198795	88.59951881	1.293121057	6.87E-06	0.000225225
YGL188C	382.5421199	197.2895953	0.955303732	6.95E-06	0.000226366
YIL161W	0	55.58543411	#NAME?	7.23E-06	0.000234336
ATP2	828.5907018	476.2590849	0.798913018	7.35E-06	0.000237152
YDL068W	71.36749851	0	Inf	7.45E-06	0.000239231
YBR116C	72.24649065	213.1762885	-1.561047561	7.60E-06	0.000242899
SYG1	465.980943	251.6976771	0.888579052	7.83E-06	0.000248933
CIT2	1568.188006	2815.774207	-0.844433121	8.73E-06	0.000276366
YAT1	87.71471552	237.6880824	-1.438178766	9.13E-06	0.000287628
YKL044W	68.75604963	0	Inf	9.49E-06	0.000297688
ISF1	115.5503276	33.23712507	1.797653847	9.89E-06	0.000308719
CYC1	1242.417551	814.4659742	0.609223782	1.04E-05	0.000323565
ACB1	784.3154943	1310.636244	-0.740761327	1.07E-05	0.000329576
YAL018C	22.64716652	0	Inf	1.14E-05	0.00035207
COX7	1940.623149	1221.684697	0.667647998	1.26E-05	0.000386712
HOM3	315.0255671	152.8784634	1.043083738	1.27E-05	0.000388487
AHP1	2833.659472	1721.532479	0.718972997	1.28E-05	0.000389471
YPL113C	25.05163113	111.9051217	-2.159299622	1.33E-05	0.000400811
YPR036W-A	1828.058782	3208.666619	-0.811661439	1.34E-05	0.000400811
KTR2	633.0788763	358.6825729	0.819677607	1.34E-05	0.000400811
STP3	196.4822207	81.56126203	1.268442768	1.34E-05	0.000400811
COS8	51.67327391	164.2103782	-1.668055111	1.40E-05	0.000415513
PDR10	107.0395108	262.4196393	-1.293732267	1.41E-05	0.000417611
DMC1	25.01717894	111.6835724	-2.158425976	1.45E-05	0.000426837
ECM15	754.0422119	1257.931933	-0.738336666	1.46E-05	0.000428537
TKL2	83.75032625	228.0114213	-1.444939377	1.51E-05	0.000441381
HSP12	7615.515612	11226.2915	-0.559867802	1.71E-05	0.000497655
QCR9	1203.857039	795.8694849	0.597060312	1.74E-05	0.000503495
UBP11	57.77070147	171.3744268	-1.568741923	1.89E-05	0.000540336
ATP20	383.0650697	205.7192987	0.896912337	1.88E-05	0.000540336
ZRT2	519.7415536	295.9422505	0.812478729	2.23E-05	0.000636257
ROG3	128.2102063	43.80743861	1.549263345	2.34E-05	0.000663333
GPD1	232.5192	466.2077349	-1.00362309	2.39E-05	0.0006743
TPO2	381.9001019	206.8695987	0.884473661	2.39E-05	0.0006743
YIL169C	68.99302376	0	Inf	2.71E-05	0.000759353
YMR181C	302.4657449	149.6286154	1.015385655	2.84E-05	0.000793919
CTH1	151.5383054	57.33614993	1.402165582	2.86E-05	0.000795018
JIP4	159.359265	62.17611917	1.357850423	2.95E-05	0.000815847
YER121W	41.85289353	139.9837751	-1.741860347	3.07E-05	0.000842495
ERO1	287.1243506	138.0085279	1.056918271	3.06E-05	0.000842495
PFK27	93.45163839	24.73632525	1.917588764	3.13E-05	0.000855854
SUE1	73.04649141	199.9993914	-1.453108726	3.20E-05	0.000872779
LSM5	49.39680219	150.359887	-1.605930182	3.26E-05	0.000883458
DUG3	372.9542513	203.1748656	0.876276733	3.28E-05	0.00088754
PRY3	112.3324753	35.11392813	1.677659768	3.47E-05	0.000932952
ATP3	910.5640321	577.340523	0.657337983	3.51E-05	0.00094126
AAC1	108.2044786	256.1537161	-1.243249608	3.71E-05	0.000991354
FSH1	330.226828	175.3831894	0.91294686	3.74E-05	0.000995435
GUT2	188.4287493	389.9277544	-1.049187748	3.79E-05	0.001002763
COX5B	268.7732505	130.2738023	1.044842571	3.89E-05	0.001027019
UGA2	578.6893634	339.3990705	0.769806513	3.92E-05	0.001029351
YNL022C	122.0738643	41.96096526	1.540634585	4.01E-05	0.001050453
YOR131C	137.230586	50.84420439	1.432446826	4.28E-05	0.001116419
FAA4	292.444005	561.9061699	-0.942168827	4.65E-05	0.001206161
KGD1	205.3045407	92.39090963	1.151942719	4.69E-05	0.001213553
BGL2	721.740326	426.6606425	0.75839083	4.74E-05	0.001221358
AIM13	98.5376186	27.34589083	1.849350545	4.82E-05	0.001237078
VHS1	116.3503284	37.63101357	1.628481229	5.00E-05	0.001279243
TPO4	107.6815288	251.5932691	-1.224322528	5.16E-05	0.001314926
ALD4	463.3983216	840.6612697	-0.859271789	5.22E-05	0.001324506
CAN1	168.651071	354.3008267	-1.070933352	5.76E-05	0.001455551
IZH4	24.4541523	100.9478959	-2.04545948	6.27E-05	0.001579444
YMR252C	237.4471975	115.1823174	1.043687475	6.40E-05	0.001606362
FET4	204.1051207	93.46981777	1.126739892	6.56E-05	0.001640265
TIM44	171.9701422	72.29886098	1.25011328	6.70E-05	0.001668405
RBA50	192.3197718	87.48580798	1.136386184	7.24E-05	0.0017952
SPG5	401.7332976	745.6833738	-0.892325131	7.37E-05	0.001820958
YHR138C	600.9225614	1003.308579	-0.739514398	7.51E-05	0.00184801
SEN15	0	39.86112183	#NAME?	7.73E-05	0.001896175
PRP6	117.9803197	41.45124311	1.509058951	7.81E-05	0.001907392
VPS24	219.7669429	104.071952	1.078393088	8.05E-05	0.001959113
PTR2	23.65415154	97.10031864	-2.037382617	8.39E-05	0.002035656
DUR1-2	73.85095449	192.5438926	-1.38249889	8.96E-05	0.002166181
YRF1-4	98.14266172	232.9102636	-1.246821911	9.15E-05	0.002202453
RTK1	272.3325959	137.4333779	0.986637243	9.44E-05	0.002265125
YEL077C	78.73441277	202.4147553	-1.362248218	9.87E-05	0.002360063
IDP3	186.7408317	376.0817362	-1.010008832	0.000101738	0.002423851
ARN2	296.3962537	552.1292783	-0.897478894	0.000114744	0.002714236
UBC5	528.0720761	907.1322424	-0.780578028	0.000119325	0.00281259
YEL020C	88.40573504	216.6762291	-1.293329021	0.000122547	0.002878337
HMLALPHA2	150.0229199	62.39915953	1.265584424	0.000124011	0.002902472
KRE1	173.0006012	77.32677248	1.161737149	0.000127552	0.00297486
GPT2	124.3491736	269.6842138	-1.116874155	0.000129455	0.002998214
COX4	434.5803608	257.8392995	0.753150805	0.000129148	0.002998214
PHO89	234.53317	444.1110095	-0.921128358	0.000132107	0.003038453
TOF2	318.8854374	176.4966048	0.853397784	0.0001321	0.003038453
PAC10	0	51.35243555	#NAME?	0.000135033	0.003095059
SPS1	0	23.08256255	#NAME?	0.000138873	0.003172127
YBR298C-A	106.0369881	36.73885211	1.529189141	0.000139589	0.003177564
FCJ1	107.1974935	36.99222219	1.5349773	0.000140998	0.003198684
GDH1	178.7274371	358.6037261	-1.004629354	0.000149059	0.003370052
HSP31	497.688566	303.5523799	0.713297758	0.000161773	0.003645108
YDL180W	161.9217124	70.93028907	1.19082272	0.000165988	0.003727437
PDE1	421.9549343	252.5550359	0.740491115	0.000173279	0.003878061
BEM1	52.68025894	143.8328433	-1.449058802	0.000174987	0.003903156
TPP1	124.0432951	48.29678924	1.360844569	0.000181173	0.004027609
SAT4	257.8657314	134.600772	0.937933377	0.000183667	0.004069457
YHR219W	84.47133564	205.7555924	-1.284397876	0.000196396	0.004337031
LPX1	62.86560634	163.4776157	-1.378750265	0.00019822	0.004358495
THI7	342.8656415	197.4156825	0.796406738	0.00019868	0.004358495
PMP3	468.5499062	817.6120188	-0.803213683	0.000204586	0.0044733
PTP3	41.53692803	124.5113419	-1.583810738	0.000208562	0.004545276
OYE3	65.31014781	0	Inf	0.000211705	0.004598708
EMI2	214.5764438	106.6178762	1.009042357	0.000216056	0.004677933
ZRT3	390.9994729	235.0725528	0.734060563	0.000220426	0.004757049
YLR455W	103.1196607	37.24708327	1.469120061	0.000223521	0.004808243
GAT1	67.15604811	171.8508372	-1.35556764	0.000231689	0.004967858
COX8	731.6741499	462.1611876	0.662805182	0.000233427	0.004973035
IZH3	166.6771778	75.41814871	1.144072935	0.000233193	0.004973035
DCP2	101.5051098	229.6315769	-1.177768687	0.000234306	0.004975103
THI73	194.1222953	375.5021132	-0.951855203	0.000235021	0.004975103
IML2	73.81650231	20.02393425	1.88221792	0.000239392	0.005051562
IME1	66.66755053	170.669012	-1.356144509	0.000246292	0.005180709
YNR068C	74.60195374	20.50183569	1.863460322	0.000257122	0.00537449
AVT2	0	74.68836818	#NAME?	0.000256865	0.00537449
YJL055W	550.061784	345.2569931	0.671923038	0.000272804	0.005684419
YPL014W	354.2860234	208.8766665	0.762263213	0.000279166	0.005798808
MEP1	96.29113675	221.1004474	-1.19922703	0.000308824	0.006375018
YIR035C	233.7631591	123.4585859	0.921020409	0.000307866	0.006375018
PRP46	194.8777569	97.32634099	1.00166721	0.000323872	0.006664953
NNF1	0	20.24846561	#NAME?	0.000326339	0.006694978
GND2	93.85221995	217.1208189	-1.210035292	0.00033245	0.00677851
RAV2	228.1153147	120.1510605	0.924913924	0.000332299	0.00677851
PUT4	84.42679645	200.7595016	-1.249695392	0.000344256	0.006997776
ATG8	869.6236917	588.2715967	0.563908864	0.000351903	0.007131404
ACC1	499.0459687	844.2723876	-0.758535818	0.0003572	0.007216748
PCD1	37.35546749	114.965241	-1.621806416	0.000370521	0.007463185
MET30	303.5172692	171.8463643	0.820659275	0.000375992	0.00755051
PRY1	101.0210746	38.14073572	1.405251715	0.000380001	0.007608042
SNM1	57.25221403	0	Inf	0.00039526	0.007889778
SIT4	138.9140412	61.25362799	1.181325231	0.000407581	0.00811136
RPN8	179.6465061	346.253858	-0.946669269	0.000417498	0.008283906
CCW14	253.5173635	138.2922277	0.874364485	0.000428542	0.008477741
RAD6	252.0509795	137.6579093	0.872628057	0.000437872	0.008636595
GPG1	704.2881209	452.801538	0.637286891	0.000439847	0.008649886
RIB1	276.6185754	151.7299499	0.866392153	0.000445332	0.008731921
PRM4	44.89937615	126.5490349	-1.4949292	0.000446656	0.008732131
CPR1	4395.213358	6516.626066	-0.568192013	0.000456736	0.008903005
TPO1	90.41078045	206.4247135	-1.19104899	0.000465194	0.009041367
ASR1	186.0688238	93.78832026	0.988356174	0.00046839	0.009076941
TSA2	178.4414615	89.46135056	0.996114426	0.000475498	0.00918789
GCV1	264.1077548	144.6325247	0.868734644	0.000478353	0.009189636
YIL100C-A	49.0362975	0	Inf	0.000477837	0.009189636
TMA17	414.6236346	722.0444394	-0.800285277	0.000480637	0.009206894
YKL065W-A	128.0911381	260.3867146	-1.023485175	0.000495794	0.009469958
CDS1	83.74586393	194.6773431	-1.216995146	0.000503267	0.009585141
YOL014W	55.44969057	0	Inf	0.000521078	0.009896018
YRF1-5	107.3210241	228.8699757	-1.092595489	0.000555012	0.010480575
YDR250C	28.37962706	0	Inf	0.000554384	0.010480575
PRX1	404.8733209	702.5831364	-0.795198369	0.000565542	0.01064917
YGR182C	831.7327787	563.9105512	0.560653753	0.000571696	0.010710945
MRT4	138.7159816	62.74650074	1.144527101	0.000572045	0.010710945
AAT2	554.2497605	902.1076083	-0.702763295	0.00057863	0.010803802
TRX1	337.3656927	588.0018257	-0.801507363	0.000599614	0.011164244
OSH3	46.06434393	126.5187052	-1.457628325	0.000606645	0.011232221
ARG3	122.8037983	250.5794933	-1.02891317	0.000605754	0.011232221
CAR1	81.58283577	188.0227212	-1.204569452	0.000610185	0.011266385
MOS1	879.5396663	611.6351725	0.524077271	0.000614033	0.011306038
ACO1	517.435092	853.3296402	-0.721725261	0.000628792	0.011545806
HIP1	121.7178219	51.8606667	1.230827764	0.000643255	0.011778826
YBR085C-A	1440.278324	1049.310127	0.456906495	0.000648019	0.011833477
HYP2	996.2513906	1519.203354	-0.608733258	0.000652629	0.011852529
MBF1	1263.897426	931.3576499	0.440472196	0.000652081	0.011852529
PCM1	136.4650374	274.0474772	-1.005894477	0.000660219	0.011957707
YGL193C	344.4276197	210.1524629	0.712764473	0.000666127	0.012031914
ACS2	196.8682529	365.7618107	-0.893673971	0.000680479	0.012257843
YDR154C	4284.574425	6303.835199	-0.557077906	0.00068607	0.012325158
BLS1	0	43.07467609	#NAME?	0.000690599	0.012373085
YJR115W	151.7708172	72.33068169	1.069214759	0.000697304	0.012459631
YCL012C	154.9108405	305.8508979	-0.981390406	0.00070788	0.012614683
ALD6	336.5077658	582.3440688	-0.791231999	0.000739953	0.013150979
MATALPHA2	326.9879104	198.5612141	0.719653455	0.000743004	0.013169998
MRPS17	320.2095503	194.4935784	0.719293814	0.000750596	0.013269184
YLR001C	102.7045298	220.4328173	-1.10183921	0.00081061	0.014292102
YBR090C	448.7267975	756.3539179	-0.753224124	0.000828809	0.014574313
COA2	337.0007257	206.9950951	0.703155116	0.00084271	0.01477966
YDR391C	157.3942965	76.53185954	1.040250903	0.000849602	0.014861323
NAF1	95.97517124	36.32459209	1.401714632	0.000855847	0.014931265
ICY1	787.8893891	535.0030824	0.558445902	0.000872532	0.015182516
GTT1	380.4592455	650.4144041	-0.773617286	0.000875731	0.015198387
ARO10	20.00572778	74.01775609	-1.887458287	0.000899283	0.015566488
GRE3	312.2216833	189.3624544	0.721420423	0.000920327	0.015889381
YHR112C	273.6510841	156.4726706	0.806426873	0.000946106	0.016292139
HXT4	427.5795759	276.143143	0.630776638	0.000950632	0.016327786
YDR524C-B	3866.336903	2841.226571	0.444453474	0.000958578	0.016421823
MET12	138.6426149	65.2939159	1.086350297	0.000966538	0.016515624
GOR1	148.4529082	72.0788026	1.042358407	0.000972429	0.016573676
SEC9	336.1427988	207.5095856	0.695896262	0.000976936	0.01660791
PYC1	653.3537057	431.9220314	0.597093327	0.000988181	0.016756225
PHO80	37.404469	0	Inf	0.001001547	0.016939652
ACA1	119.2732804	53.00768924	1.169997331	0.001015757	0.017136385
ATP17	600.792515	398.3937515	0.592671819	0.001023841	0.017229035
STE50	38.52043527	110.5032381	-1.520392736	0.00103227	0.017305247
FCY1	674.2104893	447.2035403	0.592267463	0.001033576	0.017305247
TUL1	74.00447492	172.6201888	-1.221916789	0.001076533	0.017979179
SDH4	519.0695458	343.6638898	0.594929576	0.001082298	0.018030162
SNG1	168.0191399	86.69089504	0.954673204	0.001115482	0.018536517
NSE1	32.54653827	101.1435885	-1.635828863	0.001132314	0.018769311
DOS2	131.5771168	62.20793987	1.08073797	0.00116682	0.019293164
MTG1	94.73567441	203.4312176	-1.10256138	0.001209467	0.019917703
NHX1	95.50568531	204.9954822	-1.101933593	0.001210584	0.019917703
NSA1	110.7624636	47.33949536	1.226352816	0.001272953	0.020892137
NQM1	1114.673615	830.2791938	0.424952889	0.001295087	0.021203056
STF2	2643.484608	3941.913608	-0.576455232	0.001329108	0.021706581
LEU1	585.0326898	392.2203085	0.576853002	0.001337946	0.021744075
YMR090W	363.1383333	232.5296107	0.643104788	0.001337247	0.021744075
VHT1	410.4576146	688.4522228	-0.746123286	0.001343047	0.021773746
EFR3	0	58.13434026	#NAME?	0.001352164	0.021868216
SAP30	87.99622884	33.42834473	1.396369778	0.00139753	0.022492457
IGO2	128.6051632	250.0409325	-0.959215723	0.001419508	0.022736075
PUT1	357.1555116	228.5559462	0.644005032	0.001418357	0.022736075
RFA1	42.85541623	115.2807615	-1.427602316	0.001440339	0.023014265
FRA1	291.1834429	175.6074254	0.729574476	0.001459312	0.023261499
BNA1	105.5930297	218.3317782	-1.048007526	0.001490451	0.023701022
YKL107W	46.01534242	118.3637556	-1.363040508	0.001506742	0.023900087
YML133C	89.1222821	192.8290834	-1.113464581	0.00151016	0.023900087
YKL187C	84.18982232	183.3739717	-1.123071133	0.001526809	0.024106179
YDR379C-A	149.7758588	288.0207782	-0.943367788	0.001572691	0.024771745
LSC2	225.5228774	392.3127886	-0.798730575	0.001579452	0.024819432
SIS2	67.43756143	21.64885823	1.63926143	0.001597673	0.025046535
MRPL33	184.376444	100.2181154	0.879511035	0.001619641	0.025331187
MRPS8	157.6312706	80.79816981	0.964159243	0.001644253	0.025655755
EMI1	83.54780431	181.4335272	-1.118767258	0.001657533	0.025802386
FMP37	233.4771835	401.4491024	-0.781935518	0.001665166	0.025860648
YGR139W	35.36050909	0	Inf	0.001672637	0.025916133
YPL238C	22.56817514	0	Inf	0.001686147	0.026064697
YNL190W	287.7619063	174.2983173	0.72331698	0.001709876	0.02637017
SCS7	224.15985	129.9538088	0.786528977	0.00179935	0.027621886
MSN4	84.6682329	32.47403284	1.38253422	0.001798539	0.027621886
TDH3	11184.34022	9343.455902	0.259451983	0.001816244	0.027816991
PIS1	321.3255166	204.0352063	0.655217439	0.001834793	0.028036479
SKG1	125.5542183	59.85025338	1.06888124	0.001869737	0.028374752
DYS1	113.6554258	51.85917571	1.131995378	0.001866788	0.028374752
RHO4	54.1567299	0	Inf	0.001866026	0.028374752
APE3	481.5881389	778.4473658	-0.692799635	0.001892551	0.028655546
BUD20	302.3122245	187.8603403	0.68637879	0.001898327	0.028658165
MSI1	0	37.44128491	#NAME?	0.001901347	0.028658165
YBL107W-A	184.9783851	102.2254787	0.855601882	0.001982171	0.029808798
MEC1	32.02805083	95.92147539	-1.582517849	0.002003121	0.029920774
SSA1	1631.137253	1216.738828	0.422858655	0.001999751	0.029920774
TDH1	2996.52086	2192.225978	0.450891896	0.002018015	0.030075663
TRM12	46.70636194	117.3458023	-1.329075254	0.002041715	0.030360802
RDL1	1637.080889	2502.511774	-0.612251249	0.00209416	0.031071171
HMG2	112.2089447	222.2141582	-0.985763055	0.002144813	0.031507751
HHT1	463.6899219	751.9362544	-0.697449992	0.002133899	0.031507751
ATP15	1181.679359	902.3395946	0.389096225	0.002139044	0.031507751
YER163C	242.8236156	144.7235138	0.746609395	0.002131702	0.031507751
YJL045W	0	41.95798327	#NAME?	0.002149249	0.031507751
YPK3	0	55.14084437	#NAME?	0.002152026	0.031507751
SAS10	43.01786131	0	Inf	0.002160084	0.031556213
ZPS1	4178.620891	3182.205702	0.392999778	0.002192548	0.031960226
RFU1	0	27.34738182	#NAME?	0.002227592	0.032400009
HPM1	56.40321176	0	Inf	0.00223467	0.032431993
TEF2	7313.875233	5831.522645	0.326763387	0.002247881	0.032552645
ZWF1	458.8655522	311.3296585	0.559628485	0.002256685	0.032609098
ATP1	547.4102583	375.2838413	0.544640298	0.00230439	0.03322621
ARB1	318.5204704	204.7028364	0.637855001	0.002326268	0.033413967
DCI1	0	53.96200113	#NAME?	0.002327466	0.033413967
HMRA2	148.1414051	76.75788189	0.948588119	0.002336403	0.033469982
YIR016W	118.8593119	229.8302515	-0.951313772	0.002349653	0.033587405
ERG13	91.97070511	193.0551057	-1.069766404	0.002373743	0.033643027
YRF1-8	107.4834692	215.4625832	-1.003322563	0.002367294	0.033643027
STP1	299.5618045	187.9923915	0.672179411	0.002366825	0.033643027
YPR092W	33.23755779	0	Inf	0.002374048	0.033643027
SHR3	225.4738759	384.8935835	-0.771499332	0.002400243	0.033873498
YDR524W-C	57.41019678	0	Inf	0.002425784	0.034156518
RRP36	0	41.29184416	#NAME?	0.002431262	0.034156518
TRR1	299.1522983	188.0197393	0.669996016	0.002475837	0.034646085
ENT5	80.83183652	174.2055417	-1.107794987	0.002521964	0.035217419
ILV5	326.7663768	538.1515043	-0.719752845	0.00253901	0.035381127
YRF1-1	95.3631431	196.8102029	-1.045301322	0.002561057	0.035468324
IRC13	81.70190401	32.02646112	1.351105309	0.002561275	0.035468324
URA6	51.95478723	0	Inf	0.00255583	0.035468324
SRP68	46.34585725	115.7208783	-1.320136888	0.002588702	0.035773603
PDS5	0	64.59595608	#NAME?	0.002607756	0.035962146
YNL097W-A	0	33.26745478	#NAME?	0.00262178	0.036080688
RTS3	150.2554317	78.54041842	0.935909956	0.002649656	0.036388979
NUM1	196.3287003	344.5013558	-0.811238572	0.002657027	0.036396307
AST1	56.12169844	0	Inf	0.002661141	0.036396307
ERG3	94.53315247	195.3461688	-1.04714069	0.002708413	0.036966774
NUF2	27.94459332	0	Inf	0.002725234	0.037120138
YIL156W-B	181.7994473	323.4154242	-0.831040672	0.002732476	0.037142674
TDH2	4326.418646	3322.133814	0.381063089	0.002746087	0.037251509
DUR3	20.37069479	69.75144582	-1.775727934	0.002771851	0.037448157
YLR152C	45.10636042	114.0079471	-1.337731607	0.0027668	0.037448157
TAO3	75.09045133	162.3624138	-1.112516326	0.002849352	0.038417129
SPB4	58.60515442	133.1078992	-1.183496727	0.002882282	0.038626062
YDR526C	64.67259212	144.858547	-1.163418469	0.002876747	0.038626062
YNL200C	270.8516626	165.6396095	0.70945524	0.002877025	0.038626062
ZEO1	590.6172546	902.0109506	-0.610921444	0.002920837	0.039063996
HAL9	22.12867907	70.9909485	-1.681717755	0.002969847	0.03963971
YPS6	216.6414689	129.0328086	0.747571486	0.002981433	0.039714598
SRO9	55.2427063	0	Inf	0.00300462	0.03994342
THI4	455.9734812	313.3563238	0.541145813	0.003025301	0.040138071
NHP6B	441.9528998	713.0258717	-0.690061799	0.003042682	0.040288255
MEP3	0	50.45878309	#NAME?	0.003056042	0.04038471
WTM1	319.9981037	523.672954	-0.71060274	0.003071951	0.040514404
YKE2	61.69617623	137.0860367	-1.151828646	0.003087486	0.040638656
LOC1	70.15352922	151.8953128	-1.114489763	0.003128302	0.041094509
BMH1	920.1396761	1326.228881	-0.527404996	0.003148908	0.041283608
CWC22	202.7331687	117.5703336	0.786058071	0.003272881	0.042824485
YGR204C-A	31.59301708	0	Inf	0.003306228	0.043175826
YPL109C	0	41.22820274	#NAME?	0.003334678	0.043461975
RGT1	59.70121783	133.1685587	-1.157421234	0.003368843	0.043821329
BOI2	93.04775686	40.27239986	1.208179925	0.003393558	0.044056598
YER067C-A	57.84969285	0	Inf	0.00341654	0.044268505
BRO1	0	50.8760251	#NAME?	0.003448379	0.044594115
LGE1	98.06367035	44.7950622	1.130379049	0.003478101	0.044891141
HMG1	66.71655204	146.7975005	-1.137710767	0.003517278	0.045308817
TEL04R-YP	29.10509877	84.14347989	-1.531579571	0.003557808	0.045737616
SDS23	0	52.56160851	#NAME?	0.003564328	0.045737616
QDR3	31.14905869	87.900068	-1.496675715	0.003592845	0.04601472
SHE2	0	45.4626923	#NAME?	0.003687064	0.047130607
COX17	480.5312612	334.3363563	0.523330045	0.003695878	0.047152588
EHT1	202.298135	118.7461949	0.768601735	0.003726435	0.047451366
NOP9	44.82038477	0	Inf	0.003749788	0.047566488
NPR2	0	26.16853857	#NAME?	0.003748292	0.047566488
UBP15	131.1230714	241.9588656	-0.883840249	0.003766888	0.047692394
YAP1801	393.442852	269.5551446	0.545573654	0.003918385	0.049516163
UBI4	885.1129818	1265.928975	-0.516262937	0.003934905	0.04963057
NDE1	225.7943037	138.0373666	0.709950234	0.00397067	0.049986829
ISU1	627.9480858	934.2613523	-0.573180897	0.004035433	0.050706095
FYV8	0	26.13820886	#NAME?	0.004092411	0.051325006
YJL163C	74.36944194	156.2193005	-1.070790854	0.004135978	0.051773721
YLR222C-A	52.16177149	0	Inf	0.004145955	0.051801059
HYM1	0	47.33949536	#NAME?	0.004185809	0.052200887
TFB3	46.35031957	112.6060635	-1.280633324	0.004238078	0.052753749
BOP2	63.70005928	138.263389	-1.118052573	0.004283887	0.053224297
YBL039W-B	120.5083149	225.0209074	-0.900926359	0.004314248	0.053496718
PRM7	84.22427451	35.81337895	1.233737455	0.00432191	0.053496718
YBR225W	20.6032066	67.42856203	-1.710490941	0.004357959	0.053842668
YBL068W-A	56.12169844	0	Inf	0.004426617	0.05458947
PEX12	21.40766968	68.76680422	-1.68358454	0.004453804	0.054664828
ADE8	276.7076538	175.797154	0.654450835	0.004455005	0.054664828
SCC4	29.10509877	82.49120818	-1.502968453	0.00449111	0.05497681
RCK2	338.2357602	227.8187107	0.570142958	0.004557161	0.055682808
STS1	146.7783777	79.87567863	0.877811268	0.00459582	0.056052135
MAL31	45.62038554	0	Inf	0.004659313	0.056722436
SAP1	30.63057124	85.35265285	-1.478463722	0.004709333	0.057226578
YDR381C-A	83.06376905	171.3714448	-1.044835496	0.004746724	0.057575134
YHL050C	104.4325242	203.4615473	-0.96218507	0.004780959	0.057780061
YDR161W	47.02232744	112.4118619	-1.257376425	0.004951188	0.059405321
QCR8	995.7673553	770.9645193	0.369144253	0.004940963	0.059405321
SHE1	48.75032186	0	Inf	0.004947103	0.059405321
NUP84	34.6394997	94.52108277	-1.448218063	0.005090742	0.060969667
NST1	103.391087	200.5424252	-0.955795653	0.005118223	0.061188544
RPN4	594.5670945	423.8325096	0.488345369	0.005212795	0.062207269
ICY2	385.8588665	268.8208911	0.521427998	0.005297584	0.062992915
IME2	0	52.56160851	#NAME?	0.005296017	0.062992915
YBR230W-A	366.6554642	253.647363	0.531600878	0.005329007	0.063253409
NTH1	797.3148126	589.7329441	0.435087682	0.005382603	0.063775687
TUF1	215.9159972	133.9028122	0.689283877	0.005484056	0.064862132
MEC3	0	30.88092957	#NAME?	0.005506762	0.065015007
PBI2	1277.141667	1854.260331	-0.537925241	0.005551451	0.065195221
OLA1	298.1943148	197.6327589	0.59343065	0.00554465	0.065195221
HSE1	195.9637333	116.9345242	0.744885742	0.005536666	0.065195221
SIF2	50.66628888	115.6025414	-1.190075049	0.005579622	0.065410492
CPR8	0	64.11805464	#NAME?	0.005716903	0.066784273
ARO9	96.49365869	189.0466385	-0.970236156	0.005786113	0.067446435
PBN1	94.81466579	45.23816094	1.067569949	0.005793879	0.067446435
YJR157W	26.34012947	0	Inf	0.00582261	0.06766071
SPC98	0	30.65788921	#NAME?	0.005832644	0.06766071
BSC2	213.2644715	354.8744857	-0.734665211	0.005926061	0.068624616
LIN1	46.90888388	0	Inf	0.005956767	0.068860223
CLA4	45.02736904	0	Inf	0.006031823	0.069560412
TDA2	0	63.6068415	#NAME?	0.006038267	0.069560412
UTR4	154.6293272	87.45100528	0.822267095	0.006132256	0.070520946
DNF1	115.6993857	214.8603809	-0.893018278	0.006198156	0.071155692
VPS63	71.19496643	147.7488304	-1.05329956	0.00621151	0.071186052
MSS1	45.26434317	0	Inf	0.006250366	0.071508064
SLD2	0	38.84018654	#NAME?	0.006278544	0.071707014
ULS1	50.92227466	0	Inf	0.006402555	0.072872912
DBF4	0	50.01270236	#NAME?	0.006402498	0.072872912
PEP5	0	53.96349212	#NAME?	0.006509657	0.073965282
DCP1	36.88598156	95.66363233	-1.374897944	0.006558625	0.074394511
YIL156W-A	179.8344787	309.2494125	-0.782101206	0.006593788	0.074665941
YSY6	347.9916986	547.6720438	-0.654259348	0.006642432	0.074992984
YLH47	111.6904572	57.30283823	0.962827425	0.006662085	0.075055724
RPN14	73.04202908	31.07214923	1.233104809	0.006782604	0.076155352
IFH1	54.12674003	0	Inf	0.006852794	0.076813699
YER137C	73.48152515	149.150714	-1.021317408	0.006911562	0.077342006
AVT7	438.6204415	313.5826415	0.484127348	0.007056419	0.078698013
MUP1	243.193045	155.9326187	0.641179221	0.00705406	0.078698013
VPS55	135.1376245	239.1839371	-0.823691105	0.007084514	0.078879001
YDR215C	29.18409015	0	Inf	0.007125825	0.079206281
CAR2	0	43.10500581	#NAME?	0.007154054	0.07938731
PET10	171.9835292	296.8677237	-0.787549843	0.007191624	0.079488928
PNC1	2017.177576	1550.668675	0.379447628	0.007199088	0.079488928
HEM1	146.5324789	83.1543653	0.817356566	0.007187981	0.079488928
YFL040W	0	24.99118632	#NAME?	0.007231939	0.079719235
TSA1	7474.167839	6202.424231	0.269080755	0.007281967	0.080005344
APD1	202.3281248	125.3398619	0.690851568	0.007280564	0.080005344
CDA2	0	60.10809644	#NAME?	0.00729518	0.080018251
MLF3	178.8019662	107.8921815	0.728772278	0.007464341	0.081738838
YGL188C-A	46.34585725	0	Inf	0.007519616	0.082208692
KTI12	71.75799307	30.17998777	1.24954732	0.007631421	0.08329402
YER079W	550.3875654	399.294859	0.462993379	0.007672814	0.083377523
ALR1	175.4695079	105.8211768	0.729591982	0.007676703	0.083377523
SMC4	0	40.52726094	#NAME?	0.007673643	0.083377523
PGA3	196.7292818	120.6607826	0.705254864	0.007725141	0.083766746
SSA2	395.2008363	281.1103951	0.491449196	0.007760613	0.084014326
AVT1	39.29044617	96.84694856	-1.301528043	0.007781316	0.08410147
DIP5	72.32994435	146.5396574	-1.018626201	0.007923518	0.085499386
GIS2	120.7452891	217.9175182	-0.851815276	0.007954151	0.085635564
INO2	65.74964388	26.6161103	1.30468333	0.007961904	0.085635564
PDR8	0	35.33995049	#NAME?	0.008034883	0.086280886
AVT6	57.04522977	21.68067894	1.395696315	0.0080912	0.086745495
YPT6	71.19496643	145.3926349	-1.030107039	0.008111545	0.086746528
ISA1	99.58914282	189.6521182	-0.929295111	0.008130448	0.086746528
RRP14	99.10956989	48.99474906	1.01639723	0.008120225	0.086746528
ERR2	58.80767637	22.63499082	1.377449765	0.00824501	0.087827859
SWI6	0	29.44722525	#NAME?	0.008310435	0.088383143
PER33	177.280956	107.8921815	0.716447243	0.008448492	0.089707866
SYC1	91.64019028	44.06080869	1.05648448	0.008571001	0.09086355
YOR052C	399.8517827	619.1177236	-0.63074844	0.008636173	0.091408668
MAC1	110.2139863	58.00676202	0.926014321	0.008738923	0.092202568
YJR056C	83.5923435	38.23470686	1.128487994	0.008731963	0.092202568
MCM1	199.6376846	124.6070994	0.679997809	0.008773304	0.092418626
ERP1	35.92353572	91.94035591	-1.355768899	0.008818333	0.092599458
ENP2	59.57768726	23.30262093	1.354279892	0.008816096	0.092599458
ATC1	54.28472279	0	Inf	0.009000064	0.094358719
FRS2	160.9937187	96.55728479	0.737547389	0.009090823	0.095160154
NUP120	59.61213945	125.8799138	-1.078370039	0.009112642	0.095238575
KAP95	67.02805522	27.53860148	1.28330978	0.009176699	0.095757487
YDJ1	283.0319685	189.5825128	0.578139119	0.009197342	0.095822462
YAR028W	86.35285048	39.82631913	1.116521654	0.009392523	0.097702816
RPN7	100.1521695	188.4399633	-0.911911283	0.009467754	0.097913069
RCR2	230.8491317	150.77862	0.614518434	0.009471657	0.097913069
HXT1	154.1408296	90.15781939	0.773724534	0.009439153	0.097913069
TRE2	0	51.41309498	#NAME?	0.009447784	0.097913069
SNT1	137.8280648	78.72865609	0.807908925	0.009496704	0.098019548
APA1	323.9714177	225.8161158	0.520718087	0.009547315	0.098389147
EAF5	287.0854361	193.5318116	0.568909417	0.009562356	0.098391615
GAL80	196.9707183	123.2355455	0.676562734	0.009742834	0.100093691
SEO1	46.26686587	0	Inf	0.009882223	0.101369033
CSR2	55.32169768	119.0040379	-1.105093192	0.009913101	0.101372894
YGR122W	37.16749488	93.76097253	-1.334946082	0.009950881	0.101602928
PET18	205.133171	131.0657332	0.646270255	0.010030629	0.102260108
DIC1	34.63503738	86.71973376	-1.324128097	0.010078083	0.102586551
RAT1	0	47.84921751	#NAME?	0.010212528	0.103796133
YDL183C	66.10006157	132.97883	-1.008473069	0.010262252	0.104142272
NCR1	115.7483872	209.4485391	-0.85560373	0.010287913	0.10424353
GSC2	382.3695878	587.3461235	-0.619243154	0.010337938	0.104540056
SDP1	39.00447053	0	Inf	0.010348632	0.104540056
MET10	105.7210226	195.0291573	-0.883427542	0.010368184	0.104578636
PEX19	350.5885981	249.6221995	0.490032835	0.010389265	0.104632492
YJR120W	134.737043	76.98390425	0.807517798	0.010427735	0.104861051
VOA1	88.0363057	169.4036526	-0.94429447	0.010450064	0.104926856
ISY1	79.6968586	36.51581175	1.126001557	0.010528711	0.105398107
SKT5	61.42358756	24.70450454	1.314018656	0.010524393	0.105398107
GSP1	809.7121896	621.9996518	0.380495424	0.010561269	0.105565042
PHO3	368.3089295	265.2296659	0.473674226	0.010599201	0.105785121
PCA1	38.20446977	94.04765431	-1.299650524	0.010768668	0.107274418
ERG28	108.9254879	199.9294906	-0.876149716	0.0107807	0.107274418
GLO2	466.9689163	342.4910105	0.447260399	0.010880553	0.107896607
CUP2	204.0751309	131.0080558	0.639444856	0.01089236	0.107896607
RSM28	148.4918228	87.42216656	0.764312448	0.010908157	0.107896607
CCM1	0	51.57398492	#NAME?	0.010865854	0.107896607
PPZ1	36.60446824	91.43212476	-1.32068138	0.011007887	0.108267094
FMP21	329.0473109	506.7712895	-0.623039761	0.011016622	0.108267094
SPN1	210.6274951	136.8311756	0.622296805	0.011038482	0.108267094
YGR021W	88.52480328	42.85163573	1.046731457	0.010994281	0.108267094
YPL039W	67.07259441	28.49291336	1.235120265	0.010969937	0.108267094
ADF1	55.04018436	21.2027775	1.376232037	0.011043341	0.108267094
CCR4	52.1172323	0	Inf	0.011110452	0.108764618
GRX1	995.0620576	796.4993303	0.321113354	0.01117669	0.109216611
SMP1	22.48918376	0	Inf	0.011189486	0.109216611
GRR1	27.42610587	73.53985465	-1.422976531	0.011228239	0.109434172
ADI1	166.9732404	283.4404385	-0.763428691	0.01126141	0.109596768
OPI10	120.4293235	67.3664116	0.838085361	0.011295756	0.109770303
YBR139W	177.558007	297.671878	-0.745432512	0.011333071	0.109811837
ELM1	0	48.4865179	#NAME?	0.011323237	0.109811837
UTP23	23.49616879	65.96750998	-1.489330115	0.011429564	0.109906211
SEC11	59.89365277	124.6389201	-1.057279612	0.01136036	0.109906211
RKI1	65.46813056	130.8123632	-0.998634209	0.011410045	0.109906211
SPO73	72.44901259	143.4855021	-0.985867041	0.011442019	0.109906211
PIC2	342.3816062	244.0194334	0.488609151	0.011429372	0.109906211
RRN3	0	52.56011752	#NAME?	0.011402276	0.109906211
YMR209C	0	32.28281318	#NAME?	0.011480595	0.110117625
SLU7	113.9414014	62.20943087	0.873086843	0.0116382	0.11130808
YMR182W-A	54.12227771	20.72487606	1.384859082	0.011631681	0.11130808
VPH1	355.7134928	544.2354491	-0.613515231	0.011681014	0.111557044
RRD1	33.03503585	82.2030354	-1.315194757	0.011830565	0.112661551
LYS4	104.4815257	55.36388474	0.916230788	0.011816932	0.112661551
PUN1	245.9190998	384.8647448	-0.646167732	0.011904513	0.113203574
MHP1	143.998859	85.15696021	0.757861024	0.012065005	0.114565839
YJR012C	53.5637134	113.5877232	-1.084479026	0.012188842	0.115576647
YNK1	725.2384452	548.5879802	0.402732393	0.01236589	0.117088419
ERD2	108.9210256	197.8632543	-0.861221238	0.012429574	0.117524008
FPK1	215.1148341	141.4463181	0.604852391	0.012447366	0.117525061
MFA1	634.1746686	471.6180857	0.427261208	0.012471969	0.117590326
ECM7	0	46.63706256	#NAME?	0.012538158	0.118046937
CTP1	91.12170283	170.5810048	-0.904590391	0.012618271	0.118633163
VPS71	38.00194783	92.58212928	-1.284660376	0.012688072	0.118952908
YDR090C	110.0114643	60.32964582	0.866714858	0.012680017	0.118952908
COQ8	0	43.1064968	#NAME?	0.013080792	0.122462007
TAF13	90.47968482	169.3034221	-0.903945325	0.013203918	0.123440844
ALB1	32.51654841	80.80264279	-1.313228354	0.013247393	0.123673341
HIR1	28.58661133	74.49416653	-1.381787844	0.013365223	0.124423864
YEL073C	313.3320249	221.7347658	0.498857243	0.013350929	0.124423864
YBR056W	208.2675696	334.2132511	-0.682330728	0.013436853	0.124915755
YKT6	355.9249394	541.0855363	-0.604283652	0.013467074	0.125021846
YGR266W	0	53.07133066	#NAME?	0.013772077	0.127675031
RIM8	171.9879915	108.0878742	0.670103154	0.013858033	0.128292964
YBL113C	136.8210797	232.1760101	-0.762928391	0.013898639	0.128489919
CDC26	37.03950199	88.1822768	-1.251424026	0.014008144	0.129322408
STP4	314.7351291	223.7769318	0.492076891	0.014115072	0.129948591
PNT1	69.07201514	31.10247894	1.151071743	0.014108313	0.129948591
GPM1	4308.480371	3531.580539	0.286865113	0.014188783	0.130446534
TIM9	195.2682514	315.4636222	-0.692016249	0.014217448	0.130529522
NSE3	0	57.78223066	#NAME?	0.014370618	0.131753791
PDI1	574.3377796	430.4157397	0.416168628	0.014413584	0.131941425
TRM5	593.1651526	444.2022941	0.417217001	0.014443458	0.131941425
RIM21	106.881528	58.90041448	0.859662847	0.014450633	0.131941425
NAB6	374.7401719	275.0912872	0.445980195	0.014621161	0.133210889
VPS1	40.6133967	0	Inf	0.01462975	0.133210889
YML116W-A	381.795583	280.2800887	0.445931154	0.014683708	0.133519298
YGR054W	63.58661572	28.04534164	1.180961969	0.014769584	0.134116701
RSM18	382.2006268	280.8885503	0.444332326	0.014875624	0.134711547
IGO1	308.8191583	219.6379043	0.491635205	0.014874369	0.134711547
SOD1	1982.757201	2817.146943	-0.506726794	0.014923138	0.134957954
SWR1	82.58535847	156.7941551	-0.924913845	0.014992191	0.135398227
PAT1	0	45.04843228	#NAME?	0.015062873	0.135851991
MAL33	30.06754461	74.87958783	-1.316365435	0.015207546	0.13697095
YLR063W	35.67647459	0	Inf	0.015263914	0.13729261
AEP3	105.597492	58.19798168	0.859534544	0.01528491	0.137295673
TRS120	41.92742258	95.25533628	-1.18390577	0.015328503	0.137501429
TEL05L-YP	23.57069784	64.37142472	-1.449425928	0.015513028	0.138876195
YPI1	77.934412	147.3057316	-0.918481169	0.015523546	0.138876195
YPR204W	69.63504177	135.5232632	-0.96065513	0.015570966	0.139113185
IES1	390.3919071	587.0561643	-0.588575389	0.015632938	0.13928303
PMP2	946.2671966	766.3544406	0.304235817	0.015662825	0.13928303
PMA1	247.9975119	167.4254234	0.56680703	0.015673794	0.13928303
FMO1	79.22291035	38.17255643	1.053381894	0.015628387	0.13928303
TRM13	24.53314368	65.99485771	-1.427621502	0.015778073	0.140022502
ATG9	75.01145995	143.3261032	-0.934118457	0.015810101	0.140119655
YBL029C-A	133.3796402	226.1316363	-0.761624379	0.015853971	0.140134766
YDR248C	137.230586	82.64464316	0.73160885	0.015844074	0.140134766
AIM44	33.35100136	80.32325035	-1.268087572	0.015957059	0.140485523
PKH3	47.22931171	102.7337098	-1.121155232	0.015932195	0.140485523
PSA1	953.79004	772.8422086	0.303497829	0.015938058	0.140485523
POL3	0	21.68067894	#NAME?	0.016168894	0.14216222
HSP33	35.6420224	84.5259192	-1.245814599	0.016425154	0.144224573
HTB2	428.4840956	320.173622	0.420387202	0.016528549	0.144940983
KIN4	0	26.35975823	#NAME?	0.016592784	0.14531256
BIO2	287.0319723	435.2902162	-0.600766147	0.016834077	0.147110714
CRR1	0	43.32953717	#NAME?	0.016842373	0.147110714
SSO1	105.6764834	188.7554838	-0.836864195	0.016953391	0.147611326
UFE1	59.24717243	25.43577606	1.219887191	0.016966309	0.147611326
PEX21	62.29811738	123.6816262	-0.989370723	0.017147856	0.148995818
SRB4	53.27327544	110.0889781	-1.047186145	0.017226279	0.149481819
WBP1	80.150904	149.3752454	-0.898150386	0.017265503	0.149626859
MET5	50.3547857	106.2354369	-1.077064282	0.017311401	0.149829275
APE4	216.7249226	145.9674895	0.570217987	0.017384026	0.150067041
RSM23	74.88792938	36.29128039	1.045110243	0.017369987	0.150067041
HOF1	33.91402799	0	Inf	0.017685553	0.152471947
YIF1	21.53120025	60.13693517	-1.4818226	0.017766086	0.15296784
APC1	31.63755627	76.37246059	-1.271414337	0.017821222	0.153115617
YIL177C	76.48793091	143.5143408	-0.90789088	0.01782932	0.153115617
PEX32	28.74459408	72.39134112	-1.332526486	0.017853437	0.153124895
TEL16L-YP	25.61465776	66.18607736	-1.369558154	0.01828591	0.155933555
YMR295C	283.510379	200.0615418	0.50295769	0.018298206	0.155933555
YAR029W	37.24648625	0	Inf	0.018230427	0.155933555
BTS1	0	21.23310721	#NAME?	0.018274139	0.155933555
SPO1	0	30.88092957	#NAME?	0.018220103	0.155933555
YHL006W-A	0	30.85059986	#NAME?	0.018351862	0.156190559
LOA1	61.77962993	122.4724533	-0.987254158	0.018401966	0.156416712
MUB1	0	42.18102364	#NAME?	0.018459338	0.156703986
POP7	20.96817362	58.9292532	-1.490782779	0.01856082	0.157074284
UPS1	102.3140353	56.2560462	0.862923999	0.018573851	0.157074284
PAD1	42.05541547	0	Inf	0.018565256	0.157074284
GUT1	133.2305821	223.5872031	-0.746912338	0.018618592	0.157252582
VMA10	392.9109776	585.6245418	-0.575773538	0.018740259	0.158079318
SHC1	35.00000439	82.23187413	-1.232342606	0.018807783	0.158447828
TIM21	102.6745399	183.4756932	-0.837510465	0.01894068	0.159339412
AUR1	143.001961	88.15194709	0.69797059	0.018961558	0.159339412
CLB3	0	27.09102975	#NAME?	0.019095493	0.160262303
YGL039W	47.95032109	0	Inf	0.01914174	0.160447849
MIH1	46.21786436	98.24435919	-1.087923979	0.01928832	0.160865071
MIC17	296.5363871	445.4870364	-0.587174305	0.01926117	0.160865071
COX20	188.9683019	123.2703482	0.616318441	0.019216973	0.160865071
COQ10	51.95478723	21.45614758	1.275865623	0.019278441	0.160865071
ARR1	26.85861691	67.62127268	-1.332092154	0.019427456	0.161662041
URH1	121.9503337	72.83742185	0.743541943	0.019432522	0.161662041
SUR2	202.372664	136.1317248	0.572011109	0.019554842	0.162325757
MTD1	146.6203949	90.73714693	0.692320594	0.019561145	0.162325757
SOL1	127.0497009	76.37395159	0.734240403	0.019609225	0.162521845
YDR352W	54.96119298	110.7247875	-1.010493004	0.019673745	0.162841773
EEB1	91.35421464	49.75784129	0.876547393	0.01981177	0.163588618
TIM54	85.54276271	158.6724491	-0.891333943	0.019904632	0.164151475
YGR017W	138.0751259	84.8429307	0.702587082	0.020107512	0.165619124
RMD9	78.89239552	39.66542919	0.992004085	0.020164524	0.165883158
YGR042W	98.981577	176.4344544	-0.833900387	0.020252993	0.166405002
YDR026C	21.17069556	58.86262979	-1.475283329	0.020444389	0.167770194
STE2	189.1898355	124.2231691	0.606900301	0.020499988	0.16801901
YRA2	45.54585648	96.78181614	-1.087416201	0.020904433	0.168123355
DLD1	196.6446658	310.3661053	-0.658379959	0.020759839	0.168123355
AMN1	174.635055	114.4813756	0.609230271	0.020794828	0.168123355
YLR326W	159.2012823	102.6715594	0.632815354	0.020711643	0.168123355
AEP1	142.1930356	87.86973829	0.694412504	0.020783595	0.168123355
PIB1	80.34333894	40.55609966	0.986259506	0.020642333	0.168123355
YOX1	38.52043527	0	Inf	0.020888836	0.168123355
EFM1	0	50.71513516	#NAME?	0.020876327	0.168123355
TEN1	46.70636194	98.05463052	-1.069966687	0.021119213	0.168884026
ADR1	87.75925471	161.1562229	-0.876836719	0.021163335	0.168884026
COS111	45.42232592	0	Inf	0.021164494	0.168884026
ALK1	0	41.03549209	#NAME?	0.021292731	0.16950034
SME1	67.67007323	32.05828182	1.077820844	0.021383739	0.170021186
UME1	24.4541523	62.9377204	-1.36384547	0.021651656	0.170317818
PNS1	55.36623687	110.6929668	-0.999485186	0.021643727	0.170317818
PSR1	43.45289506	0	Inf	0.021617482	0.170317818
YHL017W	0	29.92512669	#NAME?	0.021473143	0.170317818
AIM1	0	49.95055194	#NAME?	0.021588298	0.170317818
DNL4	29.18409015	72.0788026	-1.304392954	0.02183254	0.171537697
UPF3	54.72421886	24.00505373	1.188841291	0.021941705	0.172191871
NTO1	0	47.18009641	#NAME?	0.022051186	0.172846977
YNL295W	31.07006731	73.765877	-1.247428234	0.022141732	0.173352287
PEX2	103.9930282	183.0251395	-0.815555013	0.022241281	0.173722436
CRF1	0	38.3955968	#NAME?	0.022233632	0.173722436
STE6	38.72295721	86.97757682	-1.167454383	0.02240354	0.174579516
SOM1	57.77070147	114.5131963	-0.987103944	0.02238871	0.174579516
ECM38	63.01912676	122.092996	-0.954118772	0.022522324	0.175299634
YPR003C	20.68219797	57.49703987	-1.475098169	0.022618884	0.175765029
APE2	265.7668448	187.1956922	0.5056139	0.022635003	0.175765029
PRP8	27.94459332	69.05199501	-1.305113917	0.02275833	0.176516478
ROT1	66.30258351	125.5629023	-0.921273289	0.022867602	0.177025
ERT1	20.36623247	0	Inf	0.022877159	0.177025
SYP1	44.38088871	94.93683379	-1.097029379	0.023225404	0.178886747
BCY1	198.6007097	134.7298412	0.55980135	0.023207729	0.178886747
GPM2	79.85037903	40.97334167	0.962613696	0.023184029	0.178886747
ERR3	27.50509725	0	Inf	0.02322482	0.178886747
ADE3	231.0771812	160.6465007	0.524485246	0.023341268	0.178998403
UTR1	151.7853665	95.92296638	0.662084529	0.023428405	0.178998403
YEH2	62.57963069	29.44722525	1.087561446	0.023282024	0.178998403
AIM18	190.9878966	127.3091451	0.585145157	0.023576403	0.179538756
VID24	157.4777502	102.2891201	0.622495305	0.023580162	0.179538756
RRP46	144.1179273	90.47781287	0.671613847	0.023527431	0.179538756
YRB1	300.8802927	220.3055344	0.449683877	0.02372933	0.180330763
IRC11	27.14013023	0	Inf	0.023738441	0.180330763
BUD27	37.52799957	84.65320203	-1.17359725	0.024017264	0.181144658
YIP5	83.9917627	152.1760306	-0.857421385	0.023964499	0.181144658
RNR4	499.4420879	723.9453128	-0.535563317	0.023916332	0.181144658
YDR340W	106.2439723	61.54030977	0.787777383	0.023908108	0.181144658
ECM4	64.18409454	122.7909558	-0.93591657	0.024264252	0.182655136
MDG1	153.2273853	247.683246	-0.69282212	0.024408407	0.183532448
DOG2	106.6790061	62.17462817	0.778878409	0.024596887	0.184740691
YDR336W	23.49616879	60.58450689	-1.36652337	0.024860907	0.185966373
NNF2	26.70063416	65.48662655	-1.294326307	0.024868934	0.185966373
ENT3	139.7095796	228.2359527	-0.708095122	0.02480357	0.185966373
ICS2	0	54.43841157	#NAME?	0.024871988	0.185966373
NIP1	31.50956338	73.7325653	-1.226512188	0.025040817	0.187018327
BIR1	22.77069708	59.18262328	-1.377995188	0.025080232	0.187102469
YDR461C-A	362.0523569	531.8501876	-0.55482158	0.025111725	0.187127394
EPL1	38.88093996	86.27365303	-1.149856947	0.025324806	0.187577846
CDC42	134.74713	220.9080321	-0.713191331	0.025308204	0.187577846
RPS14B	160.8401983	260.9570962	-0.698184614	0.025276723	0.187577846
RPS27A	836.3225831	677.9806488	0.302815424	0.025278452	0.187577846
YCR022C	25.97516245	0	Inf	0.025341493	0.187577846
SIR2	0	47.14678471	#NAME?	0.025338404	0.187577846
PPX1	38.56943678	85.76542188	-1.152938033	0.025372577	0.187599022
PET20	165.323075	109.0710248	0.600020209	0.025436073	0.187859528
RAD16	87.27521945	47.34098636	0.882482314	0.025665286	0.189342017
PTK1	24.61213506	0	Inf	0.025848522	0.190482398
MNN5	101.0656138	176.0520151	-0.800709517	0.025949709	0.191016293
YLR099W-A	175.7554835	280.4091579	-0.673963765	0.026045444	0.191508923
RPN1	151.4548517	243.4838545	-0.684938316	0.026128955	0.191910681
SNQ2	128.763146	79.62379954	0.693448109	0.026244358	0.19254553
YBL044W	82.54528161	43.07616709	0.938295867	0.026273746	0.192548611
ENA5	29.54459484	70.96360077	-1.264185001	0.026339765	0.192748077
YOR152C	43.58088794	93.31041882	-1.098342587	0.026358959	0.192748077
IMP2'	74.88792938	38.61714617	0.955491648	0.026399754	0.192834249
SUL1	138.7560584	225.9085959	-0.703188402	0.026489879	0.193068229
BUD21	59.61213945	115.6617098	-0.956233278	0.026698708	0.194377125
HAC1	956.8798995	793.703018	0.269738568	0.02679632	0.194874334
AAD16	47.46628584	96.81512785	-1.028329328	0.026963749	0.195261548
PDX3	325.0829216	242.2699132	0.424192514	0.026907576	0.195261548
ECM8	24.97263975	0	Inf	0.026933844	0.195261548
PMA2	0	24.73632525	#NAME?	0.026967068	0.195261548
YBR016W	276.1057126	409.2260857	-0.567677374	0.027078666	0.19585625
YNL234W	57.72616229	26.36124923	1.130806577	0.027136198	0.196059028
ORC6	41.9764241	0	Inf	0.027485493	0.198173384
MRP17	42.33692879	0	Inf	0.027496105	0.198173384
EDC2	160.356163	257.6813915	-0.684308554	0.02767238	0.198852228
YOR387C	217.6484539	333.3897948	-0.615210172	0.027645881	0.198852228
YDR018C	36.60000592	81.72364297	-1.158909634	0.027710179	0.198908813
YDR266C	43.13692955	0	Inf	0.027788564	0.199256298
YOR022C	27.5796263	0	Inf	0.027837736	0.199393783
PRB1	123.9242269	206.3640541	-0.735733436	0.027997073	0.200035717
SCW11	100.5860408	58.41953105	0.783907422	0.028035567	0.200035717
VPS20	96.98215627	54.8859833	0.821281568	0.028047734	0.200035717
XRN1	154.5892503	247.6255685	-0.679720285	0.028077858	0.200035926
CPA2	148.5363619	238.0006209	-0.680149189	0.028137852	0.200123548
BAT2	206.3415156	317.0810912	-0.619817728	0.028150371	0.200123548
YGR001C	0	52.56160851	#NAME?	0.028382044	0.201554965
CYR1	170.4981336	113.8122545	0.583100041	0.028455533	0.201861181
BOI1	39.21145479	85.54238151	-1.125364204	0.028651854	0.203037179
NOC3	20.44968617	54.66294293	-1.41848443	0.028926989	0.204768581
YDL027C	96.21660769	167.3599956	-0.798596879	0.029053019	0.205441934
GLC7	309.2975689	230.1490494	0.42642701	0.029183628	0.206146203
TIF34	283.7930547	207.2229038	0.453655813	0.02940446	0.207485609
MOH1	220.936373	155.9356007	0.502680612	0.029482722	0.207751562
YBL065W	0	42.40704599	#NAME?	0.02950466	0.207751562
FAS2	1191.104782	1611.777733	-0.436352474	0.029586213	0.208105351
LRE1	52.99622444	24.03687444	1.140640271	0.029623367	0.208146428
ASK10	27.5796263	65.51695627	-1.248265426	0.0298075	0.208339065
YAL044W-A	142.636994	229.3737338	-0.68535199	0.029795842	0.208339065
ARP3	184.1783843	124.2216781	0.568186791	0.029737065	0.208339065
DOA1	136.3515938	86.91095342	0.649721647	0.029721831	0.208339065
MET13	35.15798715	0	Inf	0.029790806	0.208339065
SNA4	23.57516017	0	Inf	0.029882639	0.208425919
KIP3	0	46.19396382	#NAME?	0.029852455	0.208425919
FAR11	68.36109275	34.63751769	0.980839916	0.030075609	0.209551963
MRI1	22.04968769	57.30283823	-1.377848376	0.030174133	0.210018283
ATG33	82.2293161	146.0935767	-0.829168013	0.030209792	0.210046533
YIL055C	39.72994224	85.76691287	-1.110194497	0.030539866	0.211677258
POP4	67.67453556	124.38555	-0.87813391	0.030513379	0.211677258
PAL1	55.68666469	26.13820886	1.091171603	0.030518162	0.211677258
UGA3	0	41.95947426	#NAME?	0.03065135	0.212228668
BEM2	56.09170857	107.8936725	-0.943750826	0.030717585	0.212465959
LHS1	33.11402723	73.92229396	-1.15856705	0.030809623	0.212659984
1-Oct	0	38.42592651	#NAME?	0.030784541	0.212659984
ENV7	47.51528735	21.42581786	1.149041478	0.030857662	0.212770621
TOR2	95.24969953	165.3877304	-0.796065763	0.030959496	0.213251572
NDL1	49.11082655	98.81921375	-1.008750473	0.031120794	0.214140704
FLC2	111.3644047	188.0227212	-0.755618833	0.031263331	0.214899032
NAT3	69.84202604	126.9603129	-0.862210273	0.031361624	0.215351975
YLL066C	116.3313167	195.8240703	-0.751318582	0.031659285	0.217171588
RAD3	24.97263975	61.69672673	-1.30484562	0.032028497	0.219477754
RPH1	105.0790046	179.3928522	-0.771647969	0.032104586	0.219646928
YER186C	68.91403239	35.84519966	0.943017849	0.032246028	0.219835231
ECL1	226.923657	341.6294742	-0.59022543	0.032307766	0.220030452
YIM1	86.59428693	152.8799544	-0.820055502	0.032351355	0.220101798
YBL055C	72.48346478	37.94653408	0.933683799	0.03244379	0.220483014
YJR005C-A	0	23.78201336	#NAME?	0.032473728	0.220483014
ROX1	118.7013291	74.27261716	0.676433768	0.032713103	0.221429734
GPI8	24.09364761	59.59986529	-1.306656246	0.033003932	0.221610566
SPS19	175.5484993	276.2427827	-0.654067109	0.033006538	0.221610566
SEM1	243.2141102	361.6897021	-0.572525593	0.032938202	0.221610566
YER138W-A	199.9681994	140.4875332	0.509328476	0.032991176	0.221610566
GRH1	135.5325814	87.61189523	0.629441045	0.032931395	0.221610566
HUA1	101.7120941	60.80605626	0.742204306	0.032829621	0.221610566
SLA2	64.18409454	32.05828182	1.001518722	0.033159802	0.222414938
YBL029W	0	49.02656976	#NAME?	0.033202964	0.22247994
ABF1	21.97515864	56.79460707	-1.369880365	0.033380175	0.223442117
YPL260W	188.6713481	129.6046812	0.541757522	0.033432103	0.223564576
HRP1	90.03572643	158.3842763	-0.814859633	0.033542119	0.223625344
ATP5	279.4815477	205.4005008	0.444313335	0.033537875	0.223625344
POC4	35.80000516	0	Inf	0.033524658	0.223625344
APL4	67.99050106	123.7422857	-0.863933481	0.033581877	0.223666071
TUS1	57.80515366	27.31705211	1.081396318	0.033760973	0.223961268
YDR415C	29.74711678	0	Inf	0.033758749	0.223961268
SED1	1575.857769	1317.198977	0.258664033	0.033877389	0.224309006
ASA1	29.78156897	0	Inf	0.033880885	0.224309006
PET54	47.30384076	94.52257377	-0.998701587	0.033956728	0.224587431
CDC34	110.9694479	67.65160239	0.713966517	0.034043759	0.224939231
YOR325W	0	29.00412651	#NAME?	0.034291552	0.226351484
ADH1	631.8569576	868.6174086	-0.459122875	0.034333493	0.226403502
GTT2	77.85988295	41.92616256	0.893029387	0.034463449	0.227035231
ISD11	76.85289793	137.7884695	-0.842283598	0.034516349	0.227158589
YPP1	110.371969	67.39525032	0.711654994	0.034584175	0.22720513
VMA7	189.1898355	130.718392	0.533372438	0.034634559	0.227261515
YMR316C-B	28.30509801	0	Inf	0.03472783	0.227648804
HNT2	38.0809392	81.53391431	-1.098331217	0.034848136	0.228212371
LSM1	140.1835279	91.49427518	0.615563455	0.035125646	0.229803313
RMD1	76.77390655	41.48157282	0.888145463	0.035238108	0.230312395
FUR4	38.72295721	82.74308727	-1.095449654	0.035296828	0.230469565
YMR262W	57.64717091	109.0740068	-0.919985624	0.035691307	0.231600916
HXK2	286.7394807	213.5905485	0.424892752	0.035589872	0.231600916
YPR127W	155.3057974	104.6453156	0.569603954	0.035529829	0.231600916
BOS1	114.7904037	71.6933813	0.679090199	0.03574412	0.231600916
COX11	84.11083094	46.63855356	0.850768542	0.03574884	0.231600916
MNL2	69.39806764	36.51581175	0.92637419	0.035540831	0.231600916
SRP21	0	42.18251463	#NAME?	0.035680727	0.231600916
KGD2	423.5549358	331.2518713	0.354620497	0.036021846	0.232915572
PIR3	169.3821673	115.4371785	0.553174052	0.035999475	0.232915572
CHS2	33.31654917	73.41704479	-1.139876065	0.036069735	0.232998571
GAL11	28.46308076	65.00723412	-1.191508449	0.036146828	0.233269869
BRR1	0	32.72740292	#NAME?	0.036235008	0.233612123
SNF2	25.1306225	60.74390584	-1.273293269	0.036328518	0.233859157
FET5	56.48666546	106.8058184	-0.919008	0.036345643	0.233859157
RCL1	0	40.78063102	#NAME?	0.036378873	0.233859157
YJL171C	92.28220829	160.8073906	-0.801209281	0.036446045	0.234064602
CIT1	1122.336592	954.2597252	0.23405152	0.036557236	0.234182022
SUR1	341.0141165	261.6913497	0.381965225	0.036570022	0.234182022
YPL088W	83.26182867	46.16214311	0.850945041	0.036520896	0.234182022
YBR062C	104.1020094	176.0505241	-0.757991606	0.036770089	0.234559289
YMR114C	145.3675111	95.41324424	0.607443426	0.036737215	0.234559289
INO80	131.1732353	84.62138133	0.63237924	0.03666716	0.234559289
HAA1	93.16566275	53.99233084	0.787043832	0.036699944	0.234559289
PMR1	134.0305829	213.9985492	-0.675038785	0.036915499	0.235035749
YFR018C	80.69938131	44.06080869	0.873061639	0.03690586	0.235035749
SUI3	429.8949622	336.9503949	0.351447987	0.037018109	0.235463512
YPT1	541.0190928	760.1122924	-0.490533057	0.037139745	0.23556096
VID30	158.6682455	107.954332	0.555592292	0.037085614	0.23556096
CFT1	0	42.63008635	#NAME?	0.037122498	0.23556096
DBP1	37.76943602	0	Inf	0.037196851	0.235698253
LOT5	85.14780583	48.07225788	0.824764788	0.037348193	0.236431849
FOL1	70.15352922	37.24708327	0.913388228	0.037464981	0.236945511
GRE2	114.8548458	190.6322868	-0.730980759	0.037685629	0.237788015
EAR1	246.1905261	177.2020196	0.474380198	0.037659913	0.237788015
TCP1	73.24901335	39.31808798	0.897616161	0.037705516	0.237788015
YUH1	24.8981107	60.32815482	-1.276795184	0.037819769	0.238282468
YEA4	29.83057048	68.13099482	-1.191519705	0.037936146	0.238765095
EXG2	71.16051424	37.91769536	0.908205657	0.038075974	0.238765095
VAM7	27.78661056	0	Inf	0.038035477	0.238765095
AMA1	0	37.21526256	#NAME?	0.038059309	0.238765095
YMR124W	0	50.61818204	#NAME?	0.037974662	0.238765095
MCM4	38.48598308	81.24275954	-1.077906144	0.038214251	0.239287883
BNS1	67.23057716	121.8366439	-0.857758667	0.038237947	0.239287883
ECM31	47.94585877	22.41195046	1.097138002	0.038267342	0.239287883
GRX3	74.3994318	40.27239986	0.885500157	0.038351578	0.239589228
YNR071C	39.80893361	0	Inf	0.038461507	0.239825177
SEC1	0	45.68573266	#NAME?	0.038460674	0.239825177
AYT1	0	31.80491174	#NAME?	0.038505076	0.239871829
PET117	28.67006503	64.97988639	-1.180448044	0.038662639	0.240236249
FYV6	33.39554055	72.81156511	-1.124512155	0.038836121	0.240236249
YRA1	134.4611543	213.6860107	-0.668303022	0.038993505	0.240236249
SDH2	468.4109351	369.4562484	0.342371228	0.038783425	0.240236249
URA1	294.5948926	222.7197028	0.403503227	0.038743059	0.240236249
SSQ1	172.7090009	119.2907197	0.53386146	0.038868713	0.240236249
TKL1	144.843399	95.82601326	0.596004684	0.039033421	0.240236249
MEF2	100.1866216	60.54970419	0.726498055	0.03893893	0.240236249
RAD28	67.39302224	35.30663878	0.932659743	0.038697669	0.240236249
MAK16	55.60321099	26.83765967	1.050909329	0.038705394	0.240236249
OPT1	51.8012668	24.2599148	1.094412896	0.03892265	0.240236249
YLR112W	21.84716575	0	Inf	0.039011937	0.240236249
SNO1	0	49.27993985	#NAME?	0.038812661	0.240236249
YPL199C	132.6096293	86.68791305	0.613282783	0.039286731	0.241571603
IDH2	313.7281441	450.8352368	-0.523085322	0.039389067	0.241977016
RPL41A	3048.683981	4028.248417	-0.401966043	0.039552746	0.242534225
SDS3	22.28666182	0	Inf	0.039537696	0.242534225
NIC96	20.24270191	51.35243555	-1.343030835	0.039705194	0.243158196
YET3	223.3063854	332.9389457	-0.576233135	0.039764248	0.243158196
BUD32	103.316558	63.19258148	0.709244378	0.040025313	0.244529648
YCP4	198.7287026	301.3555833	-0.600666537	0.040158391	0.245117376
CCW12	6286.290996	5500.268074	0.192707122	0.040535458	0.246874814
ATS1	93.40263688	55.13786239	0.760419942	0.040552957	0.246874814
DSL1	0	40.52726094	#NAME?	0.04055774	0.246874814
MAK31	68.1095693	121.8699556	-0.83941309	0.040738614	0.247748918
CMC4	276.0255589	205.4674196	0.425892213	0.040855026	0.248229759
CTR9	0	48.74436096	#NAME?	0.041033039	0.248629545
SAF1	20.96371129	53.03801896	-1.339132744	0.041136342	0.248801882
RNY1	70.9579923	125.3413529	-0.820825375	0.041108531	0.248801882
YIP3	730.8141694	591.9555974	0.304015643	0.041366838	0.249968518
ATG7	20.52421522	51.57547591	-1.329358169	0.041418475	0.250053226
DAP2	143.4714469	225.0497461	-0.649480291	0.04146775	0.250123537
SMC1	30.63057124	68.80011592	-1.167438723	0.042077277	0.253340271
RAD14	76.53693242	42.40555499	0.851902814	0.042042298	0.253340271
LAS17	0	23.78052237	#NAME?	0.042219566	0.253966928
ESBP6	168.3051156	116.3929814	0.532074963	0.04232426	0.254366507
APQ12	53.52926121	102.6397387	-0.939189756	0.042419046	0.254659324
YDR433W	289.3274556	219.2845991	0.399898742	0.042451249	0.254659324
FLO5	40.92489988	0	Inf	0.042487918	0.254659324
KAR2	1323.999496	1132.176011	0.225804313	0.042695971	0.255675782
VEL1	233.073302	169.9395269	0.455762303	0.043323243	0.258965464
YDC1	187.4273889	131.511814	0.511139385	0.043307537	0.258965464
CNL1	92.36119966	158.3842763	-0.778070301	0.043407864	0.259238157
VHS3	235.4522391	171.7886868	0.454799412	0.043957134	0.262282825
MMP1	50.19234063	97.13064835	-0.952459367	0.044054649	0.262628927
ARG8	47.14585801	22.34980003	1.076869105	0.044160517	0.263024156
PAH1	46.86434469	22.38162074	1.066176198	0.044246944	0.263302986
YBR255C-A	108.3669236	179.4520206	-0.727673692	0.04436822	0.263788515
RPN9	247.9140582	361.3711996	-0.543641449	0.044459883	0.263861468
ESC1	131.9821607	87.45100528	0.593796068	0.044428287	0.263861468
RNR2	218.1268645	323.6354826	-0.569202326	0.044586417	0.264376373
STB4	22.56817514	55.33206403	-1.293825974	0.044786021	0.265323243
YDL144C	37.03950199	77.23280135	-1.060149	0.04485479	0.265494021
MBA1	24.21717818	57.52587859	-1.248180343	0.045267775	0.265996662
YHR033W	72.40001108	126.5808556	-0.805997401	0.04518556	0.265996662
RPS18A	908.5711273	1190.711501	-0.390152539	0.045101444	0.265996662
YMR027W	291.7229956	222.2141582	0.392648374	0.045099718	0.265996662
PST1	248.7185213	182.1011573	0.449773853	0.045379903	0.265996662
APC5	54.48724473	27.09252075	1.008023908	0.045245824	0.265996662
JEM1	48.18729522	23.11289226	1.059955019	0.045163907	0.265996662
COS9	0	36.54763245	#NAME?	0.045044015	0.265996662
COG6	0	48.83535011	#NAME?	0.045159458	0.265996662
MSN2	80.58031307	138.9931695	-0.786514671	0.045694116	0.267602455
SPP2	50.95226453	97.57523809	-0.937368811	0.046341039	0.268786114
ESC2	23.65415154	0	Inf	0.046046266	0.268786114
TAF2	39.44842892	80.98938946	-1.037765066	0.04648269	0.269372661
RAD57	20.68219797	50.74546487	-1.29488938	0.046722688	0.270292172
DOM34	71.88598595	40.0493595	0.843931377	0.04670876	0.270292172
PEX3	314.9421134	243.0648261	0.373745548	0.046809904	0.270561247
URA8	121.1057937	195.7907586	-0.693044785	0.047085078	0.271208415
IES2	155.1433523	107.2245514	0.5329666	0.047057015	0.271208415
YOR309C	115.7427625	74.87809684	0.628306312	0.047021876	0.271208415
RPC19	112.3770144	71.82095954	0.645870145	0.046969766	0.271208415
MDM32	107.3254864	67.61978168	0.666475448	0.047222897	0.271531656
ERR1	44.97836753	21.42581786	1.069881024	0.047208203	0.271531656
ERG26	87.19176575	52.30674743	0.737194833	0.047386149	0.272234858
GPI12	86.54974774	51.60580563	0.745996237	0.047646081	0.273491798
FMP40	331.6243076	471.3370725	-0.507209401	0.047725232	0.273709765
ODC2	136.021079	91.14395198	0.577611409	0.047768689	0.273722825
ALG11	27.06113886	61.50550707	-1.184493036	0.047888014	0.274170225
OYE2	263.7217225	196.8756307	0.421731865	0.047975571	0.274435127
NAB3	43.45289506	0	Inf	0.048072331	0.274554308
YOL087C	74.16692	129.2906517	-0.801770202	0.048137033	0.274618067
CST6	84.99428541	144.4094843	-0.764727746	0.04817281	0.274618067
PET100	245.4261399	180.2591569	0.445216368	0.048266464	0.27468081
AZF1	0	45.20932222	#NAME?	0.04826432	0.27468081
CIS3	273.6121696	206.106211	0.408744418	0.048613578	0.276419548
SIM1	308.3306607	237.5941113	0.37597928	0.048697272	0.276658776
THP1	24.09364761	56.539746	-1.230612578	0.048762355	0.276791948
NPL6	79.49433666	44.95446114	0.822387792	0.048859927	0.277109157
CYC3	185.1764447	131.4526455	0.494357416	0.04898201	0.277564721
YDL073W	46.14333531	90.50963358	-0.971949069	0.049046873	0.277695541
PFS2	44.33634952	20.94791642	1.081683235	0.049429678	0.278847956
VPS30	0	39.12835931	#NAME?	0.049378312	0.278847956
PPQ1	42.90441775	87.1991262	-1.023187473	0.050060763	0.281066548
YBR241C	96.41912963	160.7404718	-0.73734191	0.050065111	0.281066548
YNL134C	462.3179699	370.023648	0.321267964	0.050050556	0.281066548
YHR080C	81.74081852	139.0612839	-0.766592219	0.050168145	0.281407307
AME1	40.81591864	82.39425506	-1.013411821	0.050226511	0.281497149
RAM2	138.8751267	93.53495018	0.570210781	0.050291587	0.281624416
YNR048W	23.73314292	56.12697697	-1.241791191	0.050345693	0.281690084
SDH3	235.5012406	173.7627384	0.438615915	0.050390792	0.281705296
EST1	0	46.1318134	#NAME?	0.050480471	0.281969488
PMT2	166.2956079	116.5479073	0.512826965	0.050537114	0.282048865
COX16	23.21465547	55.64609354	-1.261244541	0.050588667	0.282099725
ERB1	0	46.64004455	#NAME?	0.050816469	0.282895366
PEX18	0	32.0294431	#NAME?	0.051134052	0.284345316
GDT1	0	47.62617715	#NAME?	0.051162479	0.284345316
XBP1	22.6917057	54.18653249	-1.25576927	0.051338581	0.285085672
HAP3	81.50384439	46.67037427	0.804361074	0.051573208	0.285910853
PRM9	27.94013099	0	Inf	0.051548093	0.285910853
PHM8	74.80447568	42.37522528	0.819903554	0.051677007	0.286247554
YHR214W-A	83.18729962	49.02656976	0.762799462	0.051970688	0.287634607
CMS1	0	36.06973101	#NAME?	0.05213983	0.288330654
YKR051W	29.54905716	64.14689336	-1.118267299	0.052209235	0.288474468
RNH203	25.93062326	59.21295299	-1.191255921	0.052438242	0.289499165
SPP41	36.19496204	74.72018889	-1.045709199	0.052568331	0.289976514
CRN1	57.89869436	29.70208633	0.962966543	0.052654698	0.290212085
ATG26	29.18409015	63.83286385	-1.129117285	0.052909561	0.290231942
RAD4	131.8586301	89.07592926	0.565884464	0.052963945	0.290231942
PWP1	92.69171449	56.50941628	0.713949098	0.052766457	0.290231942
APL6	77.92994968	44.76324149	0.799863373	0.05290084	0.290231942
SRL3	64.9840953	35.05177771	0.89059905	0.052750535	0.290231942
MDM34	206.2681489	151.3141989	0.446973691	0.053022025	0.290310871
PMT6	31.35158063	67.62127268	-1.108938989	0.053476506	0.292093598
GCN2	133.4930838	207.6642162	-0.63748764	0.053479451	0.292093598
PEP4	942.4798017	1224.67372	-0.377863829	0.053453013	0.292093598
HOG1	93.36818469	57.46223718	0.700316871	0.053608861	0.292560016
ERG6	111.4044816	179.9694932	-0.691945103	0.053849558	0.293632496
TVP18	179.2414622	271.7822708	-0.600546947	0.053950903	0.293770137
SNA3	818.6143922	688.8388397	0.249017541	0.053963192	0.293770137
YGR149W	112.0064227	72.52190134	0.627092808	0.054050798	0.294006264
HAL5	294.5058142	228.0114213	0.369190024	0.054116405	0.294122441
LYS1	82.02233184	48.10407859	0.769857539	0.054238794	0.294414832
SWI1	0	26.17002957	#NAME?	0.054258789	0.294414832
CTR1	185.8039134	133.0124371	0.482219739	0.054513309	0.295554618
DSE4	51.51529116	25.94400722	0.989599397	0.055007656	0.297991762
YDL176W	30.55157987	66.44093844	-1.120825465	0.055137926	0.298292636
RAD23	106.9905093	68.76531323	0.6377299	0.055152949	0.298292636
PDC1	3730.152675	3225.220524	0.209836873	0.055317888	0.298941465
GNA1	65.42359137	35.78454022	0.870474514	0.055507157	0.299720612
SSM4	108.8464966	176.8180893	-0.699970904	0.055724195	0.300648316
FRT1	61.85862131	110.9174981	-0.842440396	0.055936574	0.301235954
RPL26B	724.2683211	954.3738845	-0.398030291	0.055969069	0.301235954
TEF1	4899.607357	4293.380525	0.190552094	0.056151585	0.301425132
CDC37	184.4498107	132.2475585	0.47998722	0.056073606	0.301425132
RRT1	168.4140968	119.671668	0.492931264	0.056230956	0.301425132
CCT3	106.2840492	68.25708207	0.638874451	0.056121632	0.301425132
MRPL31	95.77711162	58.9292532	0.700696945	0.056205648	0.301425132
URA4	97.06114764	159.9758886	-0.720888656	0.056366715	0.30166631
SEC23	160.9147274	113.5573934	0.502874732	0.056335812	0.30166631
RPO21	171.4950316	260.8009747	-0.60478248	0.056631112	0.302594051
CAM1	240.5726715	178.8557823	0.427676004	0.056594467	0.302594051
ROY1	30.55157987	65.99485771	-1.111106629	0.056877535	0.303666644
AIM2	136.9746002	211.4784817	-0.626602482	0.057145331	0.304851539
ULI1	42.49491154	0	Inf	0.057591742	0.306986615
ECM32	64.54459924	114.4873396	-0.82681978	0.057661278	0.30711099
ATR1	41.81844134	82.23187413	-0.975558419	0.058014818	0.308746593
VAC8	56.48220313	102.8960908	-0.865319904	0.058135499	0.309141327
NEW1	53.84522672	28.04683263	0.940980604	0.058226899	0.309379855
SNC1	249.5829641	357.4204099	-0.518102557	0.058424018	0.31017927
MPS1	22.12867907	51.85917571	-1.22868194	0.058752237	0.311672882
ISW2	22.92867983	53.76779948	-1.229589138	0.058989968	0.312162255
AFT1	26.05861615	58.19798168	-1.15920865	0.058927304	0.312162255
YDL206W	115.0529054	76.50003883	0.58876503	0.059032339	0.312162255
TIR2	24.89364837	0	Inf	0.059002239	0.312162255
OXP1	35.07899577	71.40669951	-1.02545199	0.059139337	0.312479469
YFL042C	135.7095758	92.86582908	0.547302777	0.059353782	0.313114752
DSE1	109.7254887	71.37487881	0.6204104	0.059341053	0.313114752
YBR126W-A	254.3274512	362.5803726	-0.51161364	0.05966968	0.314282377
YBR126W-B	254.3274512	362.5803726	-0.51161364	0.05966968	0.314282377
ATG4	33.75604524	69.75293682	-1.047108068	0.060025765	0.314661878
RAD51	33.75604524	69.56022616	-1.043116731	0.05997941	0.314661878
YDL124W	668.3690475	547.8923976	0.286752338	0.0599902	0.314661878
YLR224W	95.92616973	60.07478474	0.675164878	0.059992609	0.314661878
YEL043W	67.23057716	38.3941058	0.808232687	0.059803799	0.314661878
RRP1	0	45.93910275	#NAME?	0.059910346	0.314661878
DIP2	37.84396507	76.05694009	-1.007016644	0.060428265	0.31577569
RFA3	104.1955501	168.2536481	-0.69134412	0.060393769	0.31577569
ATP12	0	30.40302813	#NAME?	0.060357249	0.31577569
YMR244C-A	30.86754537	66.02518742	-1.096925729	0.060577317	0.31630591
NSG2	330.3803484	261.66102	0.336428855	0.060783881	0.316886633
TMA108	89.72422325	55.39421445	0.695762224	0.060752579	0.316886633
RPC40	79.89938055	135.0438707	-0.757171938	0.06084075	0.316934534
PEP12	160.3261732	114.3523064	0.4875245	0.061007454	0.317554068
PDR16	89.84775381	149.155187	-0.731259807	0.061286501	0.318756944
UBC7	212.8139972	158.574005	0.424436753	0.061347249	0.31882343
HAT1	0	41.67428347	#NAME?	0.06218795	0.322940081
CTR2	118.8682365	188.5657551	-0.66570444	0.062331355	0.323306733
UFD1	228.5203585	330.3323621	-0.531595616	0.062355986	0.323306733
SSZ1	671.2320198	551.9701748	0.282221224	0.062404474	0.323306733
TIF3	293.4753552	229.4466166	0.355080824	0.062495362	0.323525445
ARP8	82.51082942	137.5321174	-0.737113178	0.062691131	0.3236105
ATX1	98.69560136	160.2322407	-0.699106771	0.062575314	0.3236105
MGA2	145.0960848	220.4313263	-0.603320674	0.062618831	0.3236105
HHT2	529.4250165	724.9350182	-0.453425314	0.062744276	0.3236105
YGR210C	86.11587635	53.29288003	0.692336437	0.062755218	0.3236105
SPC110	28.82358546	61.82251857	-1.100882621	0.062929115	0.323753736
OPI3	2285.617903	1934.372978	0.240718245	0.062918308	0.323753736
AIM9	86.38730267	53.5159204	0.690851137	0.06291608	0.323753736
CSH1	37.97195796	0	Inf	0.063230203	0.325051169
PAN3	61.85415898	33.99872631	0.863389904	0.063389936	0.325620481
ELP4	37.04396431	0	Inf	0.063483753	0.325850583
TGL3	0	34.38265661	#NAME?	0.063562078	0.326000875
SQS1	25.69811146	57.01913843	-1.1497839	0.064182383	0.328737361
YPR012W	0	20.72636705	#NAME?	0.064194538	0.328737361
SNU13	360.447893	290.0554893	0.313461794	0.064711195	0.33112803
MSY1	0	20.50183569	#NAME?	0.064896208	0.331819303
COA1	152.5363657	108.9389736	0.485633053	0.065115394	0.33268411
LDB19	49.2688093	91.20908439	-0.888502918	0.065315769	0.33345155
RDS3	80.33887661	47.33949536	0.763053961	0.065453715	0.333899345
SSN3	0	41.29035317	#NAME?	0.065504093	0.333900081
SEC20	22.41019239	51.83033699	-1.20964174	0.065607879	0.333916975
SMP3	61.62164718	108.629417	-0.817905688	0.0655683	0.333916975
ISA2	55.72674156	100.6353574	-0.852695569	0.06577552	0.334514063
VPS27	130.8516451	90.76449466	0.527732104	0.065899771	0.33488974
YAP6	32.02805083	0	Inf	0.066020301	0.33505608
ATE1	0	41.29035317	#NAME?	0.066033318	0.33505608
MRPL38	83.18283729	137.6579093	-0.726729704	0.066245086	0.335874209
CCC2	28.38408939	60.83638598	-1.099851993	0.066510661	0.335984343
SMF3	195.4853227	288.1438835	-0.559729104	0.066416472	0.335984343
RCF1	155.4637801	111.3605969	0.481339652	0.066434	0.335984343
YOR376W-A	41.33440609	0	Inf	0.066519542	0.335984343
SNU56	0	23.558973	#NAME?	0.066371407	0.335984343
SPT3	25.77264051	56.82791877	-1.140759525	0.066662379	0.336194864
FRE2	0	43.83925931	#NAME?	0.066662327	0.336194864
MIM1	201.2466107	294.6040083	-0.549812573	0.066746304	0.336362915
AIM32	42.13440685	20.24846561	1.057186228	0.066914757	0.336956357
RPS29B	983.9564789	854.7900875	0.203024327	0.067190629	0.338089409
CNS1	66.22359214	38.17255643	0.794809461	0.067375053	0.338760952
SNF12	42.93440761	20.94791642	1.035327532	0.067441488	0.338838676
MET16	299.6464206	235.9067415	0.345044494	0.067593809	0.339347469
GGA1	95.7726493	156.4408499	-0.707931663	0.067860092	0.339814383
PRE7	152.8178791	228.8655027	-0.582686677	0.067767368	0.339814383
BAT1	335.3217328	268.4720588	0.320774042	0.06785335	0.339814383
YPR002C-A	73.89103136	43.8089296	0.7541743	0.067891304	0.339814383
YDL157C	84.03630189	138.0721693	-0.716337969	0.067966985	0.339937206
CHO1	224.5458823	323.4231746	-0.526412791	0.068080571	0.339993653
FLR1	39.60641167	0	Inf	0.068075842	0.339993653
YPT7	191.7032814	282.7623714	-0.560715115	0.068395556	0.341310256
GLC8	208.6669888	156.949081	0.410905802	0.06895762	0.343599174
CCH1	25.8171797	56.35150833	-1.126122819	0.069269715	0.344895729
TRP3	71.55547112	120.3999576	-0.750700899	0.069357278	0.345073223
TAF12	40.65793589	78.95467844	-0.957487781	0.069455035	0.345301137
YOR041C	26.77962554	0	Inf	0.069899928	0.347136152
MRC1	0	20.98122813	#NAME?	0.069952846	0.347136152
YMR087W	0	41.00367138	#NAME?	0.06998081	0.347136152
FOL2	229.9312251	174.176703	0.400650731	0.070041049	0.347175879
ATG11	62.97458758	109.8082603	-0.802144911	0.070345575	0.348166072
YGR161W-C	200.4166201	150.2323087	0.415807043	0.070342916	0.348166072
FMP52	53.11975501	96.20964817	-0.856933086	0.07046903	0.34825847
AGX1	125.0758077	85.57569321	0.54752979	0.070455098	0.34825847
TIP1	394.6924358	320.5251408	0.30029135	0.07053229	0.348312133
FLO9	30.86754537	0	Inf	0.071288377	0.351784591
PIM1	57.6917101	102.4152073	-0.827994019	0.071472663	0.352432338
KEX1	41.85289353	80.63727986	-0.946119605	0.071786266	0.353716314
ISM1	0	35.84669065	#NAME?	0.072326691	0.356115195
CDC25	144.5618857	102.0660797	0.502183744	0.072470592	0.356404505
CWC15	54.35925184	29.48053695	0.882762798	0.072492687	0.356404505
YNL170W	0	36.03791031	#NAME?	0.073009985	0.358682464
VPS75	23.1356641	51.85917571	-1.164480764	0.073186019	0.359016579
NAT2	121.4363086	83.38038766	0.542419857	0.07316102	0.359016579
IST2	43.7388707	84.04652677	-0.94227223	0.073447334	0.360032765
YMR206W	73.80641531	122.0581933	-0.725751014	0.073634452	0.36068401
EFB1	413.854786	569.3845434	-0.460278689	0.073884569	0.361642659
ELF1	396.8498393	323.744659	0.293736829	0.073998142	0.361932045
FAB1	27.50063492	58.92627121	-1.09944605	0.074279032	0.362772024
YBL036C	108.4114628	72.33217268	0.583807915	0.074274931	0.362772024
OSH7	44.45988008	85.09630078	-0.936592361	0.074524762	0.363438071
ITR1	1507.246316	1310.964874	0.201286172	0.074477351	0.363438071
SNF4	50.79428177	91.33666263	-0.846527983	0.074915496	0.365075734
PSR2	43.05793817	81.75248169	-0.924983288	0.075048907	0.365457938
CWP2	1376.809801	1204.95605	0.192348746	0.075305962	0.366441235
RGP1	37.16749488	72.61736347	-0.966273098	0.075521401	0.367220739
CDC10	53.40126832	96.11269505	-0.847852994	0.075797618	0.367492869
TED1	89.68530874	145.1119171	-0.69422242	0.075671791	0.367492869
ARC1	158.5203497	115.3417164	0.45875366	0.075774316	0.367492869
NMA1	65.55158426	38.64747588	0.762256455	0.075798514	0.367492869
PRE3	170.7006556	253.8308323	-0.572398722	0.076029417	0.367788594
MRP1	73.28346554	43.83776832	0.741313373	0.076066728	0.367788594
MMS4	23.49616879	0	Inf	0.075940381	0.367788594
YDR183C-A	39.08792423	0	Inf	0.076080836	0.367788594
PRE4	199.4797018	289.6412292	-0.538025027	0.076261789	0.368127897
HAL1	23.28918453	0	Inf	0.076214401	0.368127897
MPS2	0	20.02542524	#NAME?	0.07632709	0.368175738
HEM3	53.4802597	29.16203446	0.8749151	0.076445591	0.368479946
YNR073C	36.9949628	0	Inf	0.076569711	0.368810773
PDS1	26.85861691	57.72008024	-1.10368829	0.07673716	0.369349675
GLN3	44.38088871	84.5592309	-0.930023698	0.077143246	0.370386624
YPL119C-A	63.37963146	109.1331752	-0.783998555	0.077162926	0.370386624
HXT2	77.53945512	47.14827571	0.717725587	0.077046868	0.370386624
SPO71	0	37.21824455	#NAME?	0.077175489	0.370386624
AIM24	202.8956138	153.866087	0.399062389	0.077252636	0.370489374
TIM12	34.43697776	68.3525442	-0.989036503	0.077490457	0.371361979
RDS2	56.32422038	30.84910886	0.868526624	0.077728644	0.372235082
GDB1	238.7000813	182.4455165	0.38773336	0.078243844	0.373685473
YHR078W	66.38157489	39.34990868	0.75442257	0.078188686	0.373685473
ENV11	0	32.75773264	#NAME?	0.078424157	0.374217782
HOS1	0	28.55655478	#NAME?	0.078749689	0.375501563
SKN1	95.57458968	62.43098024	0.614364983	0.078855997	0.375738933
BUD3	34.6394997	0	Inf	0.07922651	0.377233964
CRP1	357.0809826	291.1766551	0.294356608	0.079350109	0.377552024
CAB3	34.71402875	0	Inf	0.079579531	0.378372777
RSP5	20.88471992	47.14827571	-1.174757214	0.079650508	0.37843955
OSH6	0	35.11691012	#NAME?	0.079753401	0.378657756
DJP1	33.03503585	66.47126815	-1.008733968	0.080072513	0.37869269
ERS1	36.60446824	70.92879807	-0.954351734	0.080096381	0.37869269
ACT1	1474.225829	1288.114298	0.194696927	0.080102591	0.37869269
ALT1	147.5739161	106.2369279	0.474152413	0.079995761	0.37869269
ECM16	54.07773852	29.73241604	0.86299812	0.079883729	0.37869269
RRT14	37.24648625	0	Inf	0.079869666	0.37869269
YRF1-7	106.9159802	167.5164126	-0.64782495	0.080396134	0.379810307
PAP2	36.24396355	70.48271734	-0.959528812	0.080976141	0.3822787
MXR2	219.2529178	311.86196	-0.508311546	0.081294969	0.383239474
YIR024C	66.87453479	40.0493595	0.73967778	0.081277284	0.383239474
FDH1	0	36.48399104	#NAME?	0.081503558	0.383950494
PPH21	133.1426661	201.1086292	-0.595002024	0.08166189	0.384423925
THR1	152.5319034	111.6805904	0.449732554	0.082148795	0.386169053
FCF2	44.66686435	23.78052237	0.909424574	0.082334573	0.386768837
YLR225C	39.08792423	74.18013702	-0.924309961	0.082426148	0.38692557
MLH3	46.22232668	24.76814596	0.900104004	0.082804315	0.388152528
MRP21	0	43.83925931	#NAME?	0.082771678	0.388152528
FMP10	100.3490667	67.14337124	0.579710318	0.082916939	0.388188619
ZTA1	76.65037599	47.14827571	0.701087859	0.082928816	0.388188619
ADE1	186.7408317	139.9837751	0.415777794	0.083011093	0.388248439
RNA15	38.20446977	0	Inf	0.083058414	0.388248439
DIA1	80.41786799	130.8441839	-0.702261803	0.083184838	0.388566138
HTS1	112.1344156	174.1769984	-0.635324987	0.083350766	0.389067796
RPL5	2216.685214	1907.145424	0.216989054	0.083433917	0.389182629
CWH43	62.53509151	106.7118473	-0.770982466	0.08367736	0.389498189
SPL2	261.9803411	204.9666434	0.354069414	0.083574492	0.389498189
YDR029W	35.36050909	0	Inf	0.083659762	0.389498189
ATG1	21.61019163	47.91136794	-1.14865614	0.083982913	0.389556472
LSB5	122.9172419	189.0148178	-0.620812039	0.08381689	0.389556472
HMO1	590.4738212	490.8224458	0.266671872	0.083881279	0.389556472
DIA3	42.05541547	21.23459821	0.985874777	0.083942022	0.389556472
ITR2	50.79428177	27.57042219	0.881544734	0.084143506	0.38975741
POL31	0	39.0965386	#NAME?	0.084116972	0.38975741
YDR133C	644.7095424	538.3501789	0.260104434	0.084210053	0.389794026
SGA1	78.09239476	127.5669882	-0.708001077	0.084383137	0.390323389
YTP1	45.90636118	85.70476245	-0.900681295	0.084713007	0.391304628
YDR366C	68.55352769	41.22820274	0.733599336	0.084672324	0.391304628
PIL1	533.583003	718.0737569	-0.428419327	0.084807033	0.391466908
MDV1	38.48598308	73.03162349	-0.924188202	0.08511735	0.392354384
PUS4	0	31.77458203	#NAME?	0.085102816	0.392354384
ATG20	110.0859934	75.19510834	0.549920203	0.085209948	0.392509027
CAT5	32.75352254	65.29540689	-0.995331439	0.085424154	0.392700252
SER2	112.0064227	77.26760404	0.535645895	0.085428699	0.392700252
YER053C-A	105.030003	71.12299972	0.562413431	0.085426804	0.392700252
MRP7	152.0968697	111.7139021	0.44518173	0.085677878	0.393573501
RPP0	547.5982309	456.1063768	0.263747445	0.086067393	0.395089753
MRPS5	52.96623458	93.31190981	-0.816988281	0.086349082	0.395526544
SMF1	70.63756447	117.1530916	-0.729887521	0.086302077	0.395526544
PPS1	113.4184517	79.01235589	0.521505183	0.086400563	0.395526544
STE3	24.814657	0	Inf	0.086358643	0.395526544
DBP3	129.9827399	92.67311843	0.48809724	0.086678655	0.39570949
HEM13	54.40825335	30.18147876	0.850162022	0.086647566	0.39570949
DAD1	41.85289353	78.63766694	-0.909893152	0.086931041	0.396506628
CYS3	109.3249071	75.16477862	0.540493429	0.086972569	0.396506628
NSA2	69.8720159	42.62710437	0.712943707	0.087122772	0.396919166
YMR196W	207.7190923	296.3609835	-0.5127217	0.087299936	0.397419268
YDR109C	68.44008413	41.25853246	0.730149027	0.087400533	0.397419268
BUL1	0	26.86948038	#NAME?	0.087730465	0.398571343
GIM3	0	34.44480704	#NAME?	0.087785233	0.398571343
GDI1	106.6389292	165.6744122	-0.635616602	0.08797088	0.399141595
CTT1	343.9581338	469.7124439	-0.449544842	0.088362292	0.400346751
COG7	84.83630265	55.36239375	0.615775423	0.088352232	0.400346751
KTR5	45.78283061	24.73483425	0.888262431	0.088417185	0.400346751
YSF3	49.39680219	88.66017824	-0.843868614	0.088667321	0.401206045
SPT5	29.10509877	59.43748435	-1.030101143	0.088955026	0.402234054
TIS11	148.6643548	109.1635049	0.445568153	0.089263851	0.403356098
SLM5	0	40.7503013	#NAME?	0.089336399	0.403409677
YEL1	22.77069708	48.99922204	-1.105580386	0.089453253	0.403468892
TAF1	50.7152904	89.61747212	-0.821359254	0.089531611	0.403468892
TDA5	0	37.7264757	#NAME?	0.089527352	0.403468892
NPL3	235.8127437	182.3227067	0.371147439	0.089768859	0.40426396
YMR103C	220.0184664	170.676467	0.366360464	0.08988429	0.404509731
YRF1-2	90.47968482	143.2927915	-0.663300226	0.090008925	0.404522872
YCL049C	31.14905869	0	Inf	0.089994094	0.404522872
RIM4	23.37263823	50.65149374	-1.115784226	0.090195261	0.40493584
RIX7	22.48918376	48.32562796	-1.103557179	0.090588174	0.40493584
LEU4	339.0892248	461.9714589	-0.446138782	0.090301502	0.40493584
AIP1	149.4598933	109.5171055	0.448602175	0.090570067	0.40493584
EDS1	49.34780068	27.09401174	0.865011763	0.090264408	0.40493584
IRC4	29.62358622	0	Inf	0.090574494	0.40493584
ELG1	0	23.81383407	#NAME?	0.090380927	0.40493584
RSC3	0	40.0493595	#NAME?	0.090578848	0.40493584
IMP1	67.95604887	113.7515951	-0.743212897	0.090927466	0.406179345
RAD52	26.26113809	55.13935338	-1.070152908	0.091080166	0.406305926
RPB10	96.57265006	153.0652101	-0.66445984	0.091139181	0.406305926
RPT3	210.9190954	298.8444619	-0.502705093	0.091048487	0.406305926
KRI1	111.5624644	78.15678352	0.513408708	0.091373746	0.407078614
TAE2	55.16371492	96.11716803	-0.801074525	0.091444834	0.407086756
LIP1	180.9204551	136.0041466	0.411704892	0.091714691	0.407777627
HAP5	91.92170359	60.58450689	0.601456631	0.091789269	0.40783641
SES1	299.9223092	242.4962309	0.306626515	0.092567786	0.410746376
TRM10	0	31.58336237	#NAME?	0.092519389	0.410746376
ZIM17	59.49869589	101.4623864	-0.770015046	0.09269851	0.410831662
GRX2	310.3000916	422.9340887	-0.446768725	0.09273284	0.410831662
TAF5	0	39.15719803	#NAME?	0.092772427	0.410831662
YOL131W	25.17962401	53.80260218	-1.09541921	0.093105139	0.4113588
PKP2	89.44270993	141.3205263	-0.659935222	0.093104928	0.4113588
YPL077C	62.30820438	36.73885211	0.762115591	0.09318392	0.4113588
NGL3	61.05415822	35.52967915	0.781064896	0.092984246	0.4113588
SNZ2	37.12295569	0	Inf	0.093200896	0.4113588
ERG1	181.5669355	263.7260607	-0.538538639	0.09338759	0.411909298
FUI1	58.64969361	100.571716	-0.778029153	0.093556368	0.41238009
ANP1	32.95604448	65.01319809	-0.980189529	0.093751381	0.412965825
YPR196W	20.00572778	0	Inf	0.094049033	0.414002597
TDA3	45.70383924	84.23923742	-0.882177016	0.094260263	0.41465782
COS3	162.4502868	121.1038814	0.423753187	0.094352871	0.414790698
YLR211C	97.53063358	66.18607736	0.559327659	0.09448621	0.414828163
PET309	0	22.8898519	#NAME?	0.094464981	0.414828163
YMR226C	226.9904237	318.7089972	-0.489608313	0.094602386	0.415064068
RFS1	443.5606636	370.031103	0.261484887	0.094728373	0.415182348
YCR087C-A	22.56817514	0	Inf	0.09481673	0.415182348
RSF2	93.08667137	61.50401608	0.597893992	0.094930555	0.415407109
YML119W	56.6891874	32.75773264	0.791238087	0.095087525	0.415546863
LEU3	0	27.34738182	#NAME?	0.095155425	0.415570376
CDC21	0	33.42834473	#NAME?	0.095381246	0.416283086
SPO14	56.68472507	97.76496675	-0.786357558	0.095511539	0.416578213
TEL02L-YP	49.83183594	88.1822768	-0.823420999	0.096101161	0.418243495
YPK1	84.98982308	135.1152625	-0.668828645	0.096145037	0.418243495
YMR122W-A	680.0409529	576.9649339	0.237137991	0.096086447	0.418243495
YLR363W-A	0	35.59332057	#NAME?	0.096043561	0.418243495
YNL115C	87.55227044	138.1691224	-0.658218746	0.096275715	0.418538048
BNA6	118.9528526	84.36353826	0.49569836	0.096466826	0.419045288
ATG23	0	26.39157894	#NAME?	0.09651848	0.419045288
IZH1	168.6956101	244.9446112	-0.53803312	0.096611296	0.419174466
SHE9	53.32673927	30.17849677	0.82133817	0.096931675	0.420290179
HST1	232.431284	181.0207582	0.360649116	0.097063404	0.420586994
SNZ3	28.54207214	0	Inf	0.097172945	0.420722939
ARG81	28.82358546	0	Inf	0.097221368	0.420722939
YIP1	120.5528541	85.57718421	0.494367692	0.09756907	0.421952899
SEH1	107.523546	165.3892214	-0.621212593	0.097668059	0.422106365
YOR352W	21.89170494	46.86308492	-1.09806761	0.09790522	0.422856398
CDC39	111.9719706	171.7235544	-0.616950306	0.09840136	0.424698536
RRT8	175.0700887	254.2132716	-0.538106735	0.098459522	0.424698536
GCD1	62.29811738	103.9428828	-0.738530505	0.098631208	0.424887646
YDL057W	26.85861691	55.30024332	-1.041900813	0.099100975	0.426440077
VAB2	74.00447492	46.38518348	0.673948463	0.099165377	0.426440077
MKS1	64.90510393	40.05085049	0.696499053	0.099283255	0.426440077
MRPL6	61.65163704	36.80100254	0.744394134	0.099312357	0.426440077
NRM1	26.26113809	0	Inf	0.099308954	0.426440077
GNP1	111.4134063	78.63766694	0.502630416	0.09957463	0.427236795
MTQ1	44.61786283	24.76814596	0.849135533	0.099626453	0.427236795
IML1	39.00447053	72.26704027	-0.88969832	0.100237425	0.42906106
CCT2	261.5943089	208.0496375	0.33040338	0.100258939	0.42906106
YCK2	31.50956338	0	Inf	0.100220955	0.42906106
YKL050C	0	44.82390092	#NAME?	0.100310048	0.42906106
RRP7	81.86434909	130.9732531	-0.677965002	0.100433894	0.429168284
GCV3	1439.132555	1273.354144	0.176565766	0.100593378	0.429168284
YHR162W	594.5270177	500.2974503	0.248956273	0.100491441	0.429168284
LYS20	227.6657316	177.9606389	0.355358969	0.100584133	0.429168284
GZF3	31.71208532	61.47517736	-0.954971243	0.100984301	0.43028375
HST4	0	30.84910886	#NAME?	0.101861977	0.433467708
FIR1	0	34.63751769	#NAME?	0.101806952	0.433467708
GEP5	63.02358909	37.97984578	0.730657868	0.101998352	0.433516896
ASI1	60.82164642	101.8112186	-0.743239766	0.102330731	0.434512819
IRC24	63.3051024	104.8971947	-0.728582405	0.102499789	0.434512819
BUD23	95.25416186	64.59446509	0.560371579	0.102437838	0.434512819
CCP1	50.14780144	28.30169371	0.825298059	0.102373106	0.434512819
GGA2	109.8044801	167.1735443	-0.606409637	0.102578115	0.434567708
YKL070W	33.83503662	0	Inf	0.102728338	0.43465007
REF2	32.8770531	64.08474294	-0.962899936	0.103260855	0.434911289
SEN1	64.13509303	106.4917889	-0.731556313	0.103289218	0.434911289
KHA1	91.45221766	143.1319015	-0.646255199	0.103313514	0.434911289
PET494	61.18215111	36.73885211	0.735804281	0.102998735	0.434911289
YFL054C	23.28918453	0	Inf	0.103119072	0.434911289
RPS0A	538.6223905	454.2358331	0.245832684	0.103448671	0.435204632
DAD2	0	41.92914455	#NAME?	0.103711374	0.43575822
MGS1	40.529943	21.2027775	0.934734881	0.104348779	0.437055032
KEI1	24.4541523	51.09608348	-1.063133258	0.105259923	0.438935198
DCR2	28.6656027	57.49554888	-1.004129659	0.105181488	0.438935198
YML009W-B	31.50956338	61.09273805	-0.955211137	0.104988043	0.438935198
LYS14	47.22931171	84.65171104	-0.841856719	0.105250295	0.438935198
RPL13B	930.9269646	1173.010451	-0.333475976	0.104879106	0.438935198
NCS2	20.88471992	45.27296364	-1.116201955	0.105388483	0.439195766
SKI7	0	27.34738182	#NAME?	0.1056274	0.43991562
LCP5	21.97069632	46.35634476	-1.077186219	0.106249072	0.44034807
PAN1	58.3681803	98.62352111	-0.756749671	0.10617608	0.44034807
ABF2	280.3160007	380.7140848	-0.441653848	0.106015507	0.44034807
YPR114W	88.55925547	59.34351322	0.577552754	0.106173255	0.44034807
YMC1	58.57070224	34.86055805	0.748583527	0.105901449	0.44034807
SAN1	0	30.68821892	#NAME?	0.105887729	0.44034807
ACE2	0	38.3622851	#NAME?	0.106261216	0.44034807
PRR2	33.11402723	63.57502079	-0.941017551	0.106405531	0.44067138
TRM9	31.87006807	61.25213699	-0.942558078	0.106596984	0.440914843
WRS1	115.9363598	175.0355528	-0.594314895	0.106940476	0.441785796
YMR290W-A	40.01145556	20.94791642	0.933606359	0.107069691	0.442044866
CTI6	212.3655765	167.0807688	0.346004244	0.107782034	0.44470961
YBR259W	0	31.58336237	#NAME?	0.108179747	0.446073685
IBA57	26.49811222	53.5144294	-1.014038363	0.108305955	0.446317224
URA2	260.6173137	208.5245569	0.321715638	0.108893337	0.448119928
YAE1	49.55032262	28.27136399	0.809552961	0.108870594	0.448119928
RPT1	191.2783346	271.9113401	-0.507462846	0.109161148	0.448168123
RPP1B	717.043678	616.8528126	0.217134713	0.109361922	0.448168123
ESA1	113.8923999	82.00883376	0.473820252	0.109352447	0.448168123
CYC2	60.30315897	36.29277138	0.732551352	0.109247124	0.448168123
YGR237C	62.29811738	102.5743109	-0.71940899	0.109900427	0.450097437
PIB2	50.66628888	88.12012638	-0.798445403	0.110004631	0.450246786
RMA1	29.10509877	0	Inf	0.110141059	0.450527766
FAD1	71.39748837	45.49451301	0.650180768	0.110391669	0.451226326
YSA1	349.2790346	291.8716329	0.259046046	0.110961098	0.453045712
SSH4	28.22610663	56.34703535	-0.997309562	0.111129873	0.453178076
YKL123W	28.22610663	56.34703535	-0.997309562	0.111129873	0.453178076
SAC6	467.9669767	396.045011	0.240742322	0.11151147	0.454455392
ALY2	33.03503585	62.87706097	-0.928536874	0.112025182	0.455710762
STE18	93.6942372	144.8844037	-0.628870082	0.111956637	0.455710762
ECM13	318.9555042	428.8286004	-0.427045953	0.111903097	0.455710762
TNA1	76.77390655	121.1038814	-0.657557139	0.112117886	0.455808924
SCW10	271.8897999	220.241893	0.303933114	0.112189582	0.45582161
TIP20	42.2923896	76.30881917	-0.851451724	0.11229891	0.455987085
YER130C	146.5713934	109.993516	0.414185077	0.112596295	0.456915491
HRI1	185.1319055	143.2927915	0.369587515	0.11283636	0.457547801
YPR013C	49.34780068	28.269873	0.803720386	0.112889784	0.457547801
ICP55	57.56371721	96.84396657	-0.750502413	0.113088826	0.458075215
PEX30	84.03183957	131.7636931	-0.648944924	0.113240267	0.458409291
MGA1	36.39748398	0	Inf	0.113402816	0.458787898
GAC1	160.9592665	122.2842156	0.396457443	0.113510092	0.458942567
YHR097C	122.3987544	88.56769811	0.466736348	0.114145304	0.461230295
MAP1	169.2286469	129.5728605	0.385210236	0.114278081	0.46148627
POP8	35.87899653	66.92033087	-0.899305037	0.114608663	0.461979252
MRPL39	41.89743272	75.61085936	-0.851731607	0.114540921	0.461979252
TRX2	1126.522431	1015.769705	0.149302688	0.114490286	0.461979252
TOA2	68.47453632	110.7580992	-0.693772703	0.114833723	0.462325717
POM34	28.17710512	56.12548597	-0.994132633	0.115088161	0.463069615
AAD14	63.9815726	40.30422057	0.66672553	0.115441246	0.463928636
TEA1	39.24144466	20.72636705	0.920910894	0.115382196	0.463928636
ZRC1	403.0173336	340.4292472	0.243486902	0.115581678	0.464018752
CRT10	73.48598748	116.2335824	-0.661485871	0.115721059	0.464211152
YPL107W	94.73567441	146.4120792	-0.628054877	0.116025803	0.465012642
SRP40	28.6656027	0	Inf	0.116060775	0.465012642
HIF1	0	30.65639821	#NAME?	0.116177708	0.465200739
LCB1	49.39680219	85.95813253	-0.799216491	0.11660291	0.46606106
YMR304C-A	239.3732515	189.8691946	0.334256095	0.116565216	0.46606106
ARG2	37.84396507	0	Inf	0.116599021	0.46606106
YOR283W	98.45862723	68.7379655	0.518410473	0.116838819	0.46644302
AGP1	39.00893285	70.58145686	-0.855484677	0.116934455	0.466544611
YKR047W	38.28346114	20.02542524	0.934888388	0.117273799	0.467617842
TPK3	86.9503293	59.12047285	0.556533683	0.117377164	0.467749408
ARA1	298.2243047	401.5511194	-0.429185822	0.118437603	0.47141003
PFK1	337.3612304	282.3847005	0.256632263	0.118658199	0.471519817
REV3	30.94207442	0	Inf	0.118626637	0.471519817
SET3	0	37.27741298	#NAME?	0.118677998	0.471519817
SKS1	144.8834759	109.1013545	0.40922405	0.118849895	0.4719207
FAP1	0	36.96189248	#NAME?	0.119179807	0.472948167
AYR1	171.1891531	244.1223505	-0.512013094	0.119305431	0.4731642
YMR086W	29.0261074	56.5064343	-0.961064045	0.119678927	0.474362451
PBS2	87.99622884	59.88207409	0.555317505	0.120225834	0.475962546
LEM3	0	34.63751769	#NAME?	0.120196625	0.475962546
MRPL50	172.0726076	132.343316	0.378732118	0.120457054	0.476594072
SNU71	51.22931552	30.40302813	0.752754593	0.120670307	0.477153794
PHB1	194.9912004	153.8009546	0.342344562	0.120809627	0.477190963
BUD26	44.66240202	25.66179841	0.799438564	0.120823287	0.477190963
OCH1	64.93955612	105.5041653	-0.70013053	0.121017446	0.477314935
FCP1	139.3190851	201.55471	-0.532778593	0.121141913	0.477314935
HTA1	769.153148	970.7595675	-0.335843136	0.121059304	0.477314935
YBR063C	84.6682329	57.52587859	0.557609666	0.121097261	0.477314935
SET2	24.814657	0	Inf	0.121294817	0.477634272
YJR039W	20.32169328	43.61323696	-1.101745453	0.121415838	0.477718198
CKA2	112.1644055	81.27607125	0.464712349	0.12145987	0.477718198
INO1	2666.230669	3363.209387	-0.335037001	0.121744897	0.478556079
RPL20B	760.2797729	664.5295076	0.194197147	0.121870869	0.478768122
YPL034W	20.16371053	42.88345643	-1.088660044	0.121973855	0.478889671
YGR250C	417.9950073	354.6181336	0.237219399	0.122092779	0.479073616
STL1	30.27006655	58.41953105	-0.94855893	0.122532778	0.479667476
SEC53	379.1752094	320.3009048	0.24343677	0.122477297	0.479667476
YML082W	59.73567002	36.80100254	0.698847598	0.122322032	0.479667476
YLR361C-A	213.1599526	294.8101379	-0.46784972	0.122749783	0.480234144
TFC6	25.9006334	51.85917571	-1.001611896	0.122897921	0.480248372
BCD1	104.4325242	74.01775609	0.496627787	0.12288617	0.480248372
STF1	1740.360857	1545.958971	0.170884443	0.123844887	0.481401734
SWC3	0	28.74777444	#NAME?	0.123645429	0.481401734
NMD4	0	29.92810868	#NAME?	0.123782494	0.481401734
PRP16	0	36.77067282	#NAME?	0.12380052	0.481401734
VPS15	0	41.98980398	#NAME?	0.123705988	0.481401734
CDC28	39.57195949	71.12598171	-0.845898155	0.124057143	0.481916042
YPR010C-A	551.1875662	470.8835368	0.22717306	0.1241222	0.481916042
QRI1	65.55158426	41.92616256	0.64477986	0.124222446	0.482023699
NOP16	111.6459181	81.30640096	0.457489665	0.124365098	0.482295686
YHR175W-A	109.6898742	164.0221405	-0.580460218	0.124462576	0.482392269
ENO2	3448.749619	3104.914537	0.151519833	0.124672908	0.482925886
LRG1	0	25.43726705	#NAME?	0.1250973	0.484287568
SOG2	28.58661133	55.64758453	-0.960979454	0.125618717	0.485175833
SRN2	64.54459924	104.6468066	-0.697159998	0.125492084	0.485175833
SAR1	396.9745322	527.1383874	-0.409135301	0.125487915	0.485175833
ADE17	108.0464958	77.55130384	0.478429341	0.125566617	0.485175833
VHS2	66.87007247	43.10500581	0.633505261	0.125765518	0.485460743
ATG13	42.33692879	74.94173826	-0.823852824	0.126703925	0.48879918
YGR079W	40.81591864	22.66532054	0.848645364	0.126818487	0.488957359
SDS24	149.6924051	114.5117053	0.386505948	0.126949812	0.489179944
LDB16	22.48918376	45.43087159	-1.014441684	0.127189973	0.489690645
SWM2	0	42.37224329	#NAME?	0.127229689	0.489690645
PET130	22.41019239	45.43087159	-1.01951795	0.127382949	0.489996795
CYM1	23.1356641	46.64153554	-1.011496775	0.127538121	0.490070686
GPI11	26.05861615	51.57547591	-0.984924757	0.127628976	0.490070686
NUP2	92.17322705	140.6225665	-0.609408463	0.127730031	0.490070686
YDR003W-A	177.7694536	138.0751513	0.364553737	0.127844527	0.490070686
THR4	147.7318989	112.5424221	0.392512454	0.127803777	0.490070686
FZO1	0	30.88092957	#NAME?	0.127670753	0.490070686
RSC30	131.8586301	192.2890315	-0.544284473	0.127985872	0.490320006
YDL086W	318.921052	424.7898035	-0.413549803	0.128057098	0.490320006
ISN1	33.5535233	62.6555116	-0.900977159	0.128556785	0.491949887
DAD3	33.75604524	62.68435032	-0.892959415	0.128934423	0.492544317
NPR3	43.7388707	76.65914237	-0.809541886	0.128846386	0.492544317
YHM2	55.00573217	91.40179504	-0.732640528	0.128904923	0.492544317
MRPL3	50.59175983	30.40302813	0.734687401	0.129072314	0.492787864
PGC1	65.67511483	105.7575354	-0.687341739	0.129241902	0.493026033
CPR4	114.6924007	170.2244223	-0.569668233	0.129283041	0.493026033
DSF2	73.24901335	48.07225788	0.607604761	0.129580512	0.493594076
YJR085C	460.1471794	607.4625379	-0.400700056	0.131064755	0.498390977
YMR310C	27.58408862	53.5159204	-0.956131826	0.131708276	0.499694584
USV1	33.83503662	63.13490403	-0.899919868	0.131686238	0.499694584
JJJ2	0	28.269873	#NAME?	0.131648077	0.499694584
YPR071W	0	34.86055805	#NAME?	0.131696434	0.499694584
MLP2	36.52547687	66.44093844	-0.863169342	0.132086445	0.499913095
RAD59	100.3891436	151.9559722	-0.598050117	0.132205705	0.499913095
YOL036W	277.1471498	228.9975539	0.275319983	0.132367541	0.499913095
SWH1	179.8834802	140.7468673	0.35395989	0.132114133	0.499913095
MTL1	97.62417428	69.27354438	0.49493395	0.131879994	0.499913095
RRP4	76.58147161	50.46027408	0.601847341	0.132350292	0.499913095
YAL037C-A	72.76497809	47.59286544	0.612498928	0.132140972	0.499913095
BUD9	36.3184926	0	Inf	0.13224065	0.499913095
NAB2	230.9937275	315.2697159	-0.448732918	0.132478522	0.500048118
OMS1	34.56050833	0	Inf	0.132573794	0.500123727
TBS1	30.788554	58.16466997	-0.917748994	0.133149304	0.502009883
YRF1-6	86.42175485	132.0215361	-0.611306858	0.133288832	0.502220057
CBP2	0	39.60178777	#NAME?	0.133356161	0.502220057
YCR061W	30.06308229	57.01764744	-0.923415582	0.133553103	0.502676941
FHL1	24.01465624	47.59584743	-0.986920552	0.133828531	0.502859381
HOS2	83.59680582	128.9067214	-0.624807766	0.133708226	0.502859381
COS6	143.7974994	109.3258859	0.39540355	0.13378448	0.502859381
UBC11	23.29364685	0	Inf	0.133987897	0.503173759
BBC1	141.9115223	107.4157711	0.401785902	0.134175731	0.503540273
YIL030W-A	39.52295797	22.15708938	0.834922548	0.134237004	0.503540273
MDS3	74.57196388	115.8529295	-0.635589284	0.134686201	0.504940315
PKP1	0	32.53618326	#NAME?	0.134924996	0.505550422
YDL158C	32.43755703	59.62870401	-0.878341811	0.135175409	0.505918322
CWC2	0	33.7165175	#NAME?	0.135128428	0.505918322
RSC2	64.21408441	102.7337098	-0.677947977	0.135744583	0.507191818
PBY1	64.34207729	102.7063621	-0.674691132	0.135740383	0.507191818
SAM1	154.2643602	119.257408	0.371325907	0.135939377	0.507468282
HAP2	55.88472431	34.63751769	0.690118444	0.135971267	0.507468282
YIL002W-A	253.5229882	207.154494	0.291409451	0.136312024	0.508169389
PHR1	30.91208456	0	Inf	0.136249123	0.508169389
HKR1	35.20252634	0	Inf	0.136555788	0.50879278
FUN30	0	26.13671787	#NAME?	0.137066053	0.510407872
VBA2	30.83309318	57.71858924	-0.90455641	0.137421546	0.511445136
LTV1	105.9235445	76.75788189	0.464636498	0.137582541	0.51175778
SKI3	53.04076363	32.28132219	0.716401876	0.137979947	0.512375814
DCN1	32.15158139	59.31169251	-0.883426842	0.138643962	0.513407475
UBC13	121.7968133	177.6754481	-0.544767951	0.13860322	0.513407475
RIO1	25.61465776	0	Inf	0.138629724	0.513407475
STU1	0	35.59332057	#NAME?	0.138603981	0.513407475
MNT4	0	37.91620436	#NAME?	0.13851771	0.513407475
CDC53	307.3982047	407.5285744	-0.40679248	0.13877215	0.513596036
RPL37A	964.7664635	1197.086896	-0.311276218	0.138958784	0.514000576
DMA2	167.0121549	130.8138542	0.352437763	0.139370104	0.514948907
IRE1	0	39.34990868	#NAME?	0.139308567	0.514948907
RRP43	33.11402723	60.10362346	-0.860009492	0.139449641	0.514949319
GTT3	58.21019754	36.51581175	0.672750612	0.139525158	0.514949319
TES1	57.56817953	94.45595036	-0.714370093	0.139897557	0.515751006
IDH1	296.7822859	393.8359911	-0.408189975	0.140372039	0.517213385
AGC1	26.5771036	0	Inf	0.140477766	0.517316182
CDC11	20.36623247	42.40555499	-1.058074143	0.140886943	0.518234659
PEX25	28.38408939	53.96349212	-0.926901254	0.141534453	0.518234659
RIC1	37.96749564	67.17519194	-0.823163698	0.142446709	0.518234659
YML089C	53.12421733	87.26425861	-0.716021199	0.142155117	0.518234659
UBP5	57.04969209	93.34223953	-0.710310982	0.141863505	0.518234659
PEX29	66.58855915	105.6011185	-0.665278886	0.142319189	0.518234659
PFK26	137.1216047	196.0441286	-0.515722537	0.141900688	0.518234659
PUP3	288.3059213	383.2749189	-0.410779125	0.141336469	0.518234659
SAH1	1679.137467	1507.516038	0.155546994	0.141670067	0.518234659
FBP26	278.5000902	232.2822046	0.261799163	0.142192118	0.518234659
RPN5	264.3592782	217.786958	0.2795824	0.141437721	0.518234659
UPC2	264.2312853	217.5017672	0.280774171	0.14187974	0.518234659
MID2	156.7077393	121.5544351	0.366473899	0.142571944	0.518234659
CMC2	135.1821637	102.448519	0.400005682	0.14117641	0.518234659
YMR099C	116.987884	87.00641555	0.427165434	0.142509452	0.518234659
MET4	93.28919331	65.963037	0.500052145	0.141218242	0.518234659
SCS22	76.69491517	51.1264132	0.585062115	0.142216008	0.518234659
KIN82	69.08656446	45.74937408	0.594653166	0.142598344	0.518234659
SGD1	35.00000439	0	Inf	0.141264572	0.518234659
MPS3	0	21.2027775	#NAME?	0.142528897	0.518234659
UBP8	0	32.95044329	#NAME?	0.142454904	0.518234659
KTR7	96.5325732	145.7111374	-0.594023412	0.142728855	0.51842552
WAR1	26.98214748	51.8606667	-0.942635578	0.142996163	0.518829419
UFD4	61.1331496	98.50071125	-0.688179245	0.142943502	0.518829419
RAD33	37.55798943	66.95215158	-0.834010585	0.143185999	0.519234772
SVF1	192.9172506	154.7522845	0.318021448	0.143372149	0.519343145
NUS1	179.2515492	141.7999187	0.338128882	0.143836624	0.520741853
TAN1	39.72994224	69.24321467	-0.801446008	0.144208241	0.521519141
INM1	46.42484862	27.25191969	0.768539345	0.144201825	0.521519141
CAB5	135.2656174	193.5315162	-0.516773352	0.144463664	0.52215877
UBP9	33.79049743	0	Inf	0.144805506	0.52310989
YSP3	0	33.23712507	#NAME?	0.144903432	0.52317931
YGR168C	35.07899577	63.22440218	-0.849874043	0.145160856	0.523633955
MRPL35	105.3115164	76.56666224	0.459874939	0.145186908	0.523633955
TPO5	156.3828491	121.5166504	0.36392829	0.145304329	0.523773252
APS2	109.3605217	160.455281	-0.553079243	0.145682108	0.523998363
IRA2	486.6141394	420.2046953	0.211685958	0.145618726	0.523998363
COX19	25.9006334	0	Inf	0.14561361	0.523998363
YBL096C	29.78156897	55.80847448	-0.90606445	0.146126678	0.524502692
NCE101	122.5522748	177.9894776	-0.53839469	0.146137955	0.524502692
YGL041W-A	74.16245768	49.75933228	0.575721928	0.1460309	0.524502692
GCN5	74.72994663	49.98237264	0.580267105	0.14613724	0.524502692
ERV15	32.8770531	59.65903373	-0.859659621	0.146493318	0.525049062
GPB1	47.30384076	81.27905323	-0.780926272	0.146601272	0.525049062
BMS1	55.44522824	89.96809072	-0.698350103	0.146606147	0.525049062
OCA1	44.02038401	26.39306993	0.738012562	0.146574556	0.525049062
OST3	73.20001184	49.24961013	0.571731578	0.146910332	0.525855129
TUP1	102.472018	74.27261716	0.464327686	0.147154785	0.526417657
PDR18	27.14013023	52.08221608	-0.940363192	0.147492301	0.526803505
COX6	223.3708275	181.4653479	0.299746699	0.147414319	0.526803505
UBP6	81.94334046	124.9181469	-0.608284462	0.14773094	0.527089401
RPS27B	1063.000341	968.450398	0.134391996	0.147672178	0.527089401
FAP7	45.98535255	78.60584624	-0.773462214	0.148192334	0.527941359
YLL067C	69.71403315	109.419857	-0.650353576	0.148140689	0.527941359
ABD1	92.53373174	138.7731111	-0.584676777	0.148208	0.527941359
ARO4	120.6763847	90.69936225	0.411979069	0.148923953	0.529859516
SIR3	27.06113886	51.5451462	-0.929614025	0.149682478	0.530634364
RPS25A	1184.537869	1478.39328	-0.319705783	0.149655987	0.530634364
SEC21	266.8872734	221.4192453	0.269449888	0.149634649	0.530634364
NCS6	108.6395123	80.57811143	0.431089011	0.149668868	0.530634364
ULP2	41.84843121	24.51328488	0.771609716	0.149568092	0.530634364
RRP3	30.26560423	0	Inf	0.149825924	0.530859765
HXT10	0	20.94791642	#NAME?	0.149980399	0.531123982
REX3	184.3464541	147.4621486	0.322074983	0.150311379	0.531446668
MAL11	22.48918376	0	Inf	0.150172118	0.531446668
FLO1	25.97962478	0	Inf	0.15029406	0.531446668
ISR1	70.67647899	47.17860542	0.583097395	0.150480998	0.531763525
CTS1	462.1166103	399.6029245	0.209689805	0.150564836	0.531777082
SGN1	46.86880702	80.35208907	-0.77770746	0.151149841	0.533183435
PLC1	66.38603721	44.0911384	0.590391109	0.151283881	0.533183435
YNR029C	58.93120693	37.693164	0.644728912	0.151218193	0.533183435
LIP5	47.46182351	28.68413302	0.726514618	0.151126909	0.533183435
DAM1	44.41534089	75.67450077	-0.768749188	0.151991952	0.534986222
RVS167	227.5433634	185.2522657	0.296650321	0.15204545	0.534986222
MFB1	43.78340988	26.16704758	0.742633162	0.15211734	0.534986222
YIL001W	0	27.06070004	#NAME?	0.151887365	0.534986222
YGR053C	0	34.19143696	#NAME?	0.152398944	0.53569317
SGM1	26.62164279	50.90635482	-0.935246163	0.152480084	0.535695095
SRT1	37.72043451	65.963037	-0.806311528	0.153014658	0.537005508
UMP1	255.0829128	340.0304069	-0.414697503	0.152962329	0.537005508
IRC5	31.71208532	58.00378003	-0.871114173	0.153797858	0.538197243
CHS3	32.59553978	59.08716115	-0.85817012	0.154008087	0.538197243
CYB5	34.6394997	62.39766854	-0.849074031	0.153585994	0.538197243
PTC5	34.71849108	62.43098024	-0.846557871	0.153447835	0.538197243
NAS2	43.01339899	73.79322473	-0.778702223	0.154161666	0.538197243
YER010C	94.33063053	140.7438853	-0.577274029	0.153978608	0.538197243
ADH4	813.7701196	731.4656347	0.153831222	0.154088702	0.538197243
NCB2	318.1566658	270.3851556	0.2347214	0.153932525	0.538197243
GAS1	312.1816064	264.9976795	0.23640581	0.154236961	0.538197243
FAT1	75.61340109	51.1264132	0.564573132	0.154575526	0.538438522
SRL1	316.8325529	269.1700187	0.235202847	0.155053294	0.539319334
SEC2	36.80699018	20.24846561	0.862167194	0.155283186	0.539836475
YGR174W-A	60.05163552	95.89263667	-0.6752165	0.155623072	0.540170526
KTI11	103.2331043	75.64417106	0.448604859	0.155546009	0.540170526
ENT2	156.4407753	122.7302963	0.350125164	0.155931077	0.540957132
IOC3	29.70257759	55.13786239	-0.892455204	0.156303516	0.541683771
GCS1	55.60321099	89.77687107	-0.691175617	0.156277533	0.541683771
GIP3	0	20.72487606	#NAME?	0.156411459	0.541775387
ORC5	0	36.25945968	#NAME?	0.1568792	0.543112522
MRD1	0	24.48146417	#NAME?	0.157005339	0.543266262
RAD50	0	24.06720415	#NAME?	0.157089692	0.543275328
CKS1	117.3828409	169.9710522	-0.534067531	0.157663021	0.544974573
EST3	0	37.94802507	#NAME?	0.158195619	0.546531329
SRF1	0	32.75773264	#NAME?	0.158385322	0.546902458
DBP2	87.8037939	130.8456749	-0.575511053	0.158884781	0.54720577
YBR242W	53.11975501	33.26596379	0.67520166	0.158811291	0.54720577
YKR017C	0	32.53618326	#NAME?	0.158737392	0.54720577
SYN8	0	33.46016544	#NAME?	0.158637489	0.54720577
ECM29	61.1331496	96.87578728	-0.664181233	0.159309637	0.548384856
NIT3	228.4657323	186.7802366	0.290635981	0.15995451	0.549945573
BAP3	88.19428845	63.06678964	0.483804733	0.159856282	0.549945573
YHR130C	29.62358622	0	Inf	0.160011244	0.549945573
COQ4	307.5306599	261.3758292	0.234604516	0.160187647	0.549983104
POP1	86.51529555	61.73003843	0.486982528	0.160166584	0.549983104
RSA1	0	33.90624617	#NAME?	0.160451242	0.550603719
ADE13	107.43893	156.3801904	-0.541540928	0.160548845	0.550654372
APT2	97.17459121	71.40819051	0.444489573	0.160886061	0.551242085
IPI3	26.41912085	0	Inf	0.160837627	0.551242085
TPD3	220.229913	180.7644061	0.28489981	0.161421476	0.552506979
PAM18	42.21339822	25.69063713	0.716458303	0.161390524	0.552506979
MSS51	74.3994318	50.81089269	0.550153792	0.162130856	0.554604118
PPR1	0	32.982264	#NAME?	0.162201054	0.554604118
GLN4	119.3133573	90.19411308	0.403650386	0.162394524	0.554694964
ATG3	82.10132321	58.22831139	0.495684692	0.162325707	0.554694964
NRG2	94.01466502	139.2813423	-0.567044291	0.162631036	0.555217514
SVP26	27.29811298	51.28879413	-0.909842426	0.162756922	0.555362044
YLR422W	49.34780068	82.39425506	-0.739557961	0.163297811	0.556921782
ERG2	182.6974511	252.2986838	-0.465676174	0.163425081	0.557070007
SBA1	628.8160997	550.4044192	0.192146102	0.163843929	0.558081428
YBL107C	128.8121475	99.13801164	0.377758423	0.163889717	0.558081428
NNT1	29.26308152	53.96349212	-0.882902013	0.164488854	0.558586681
SIP18	2184.463566	2737.791356	-0.325733461	0.164430849	0.558586681
GRS1	215.2050748	176.8516964	0.283172041	0.164542308	0.558586681
DAL82	42.25793741	72.10913231	-0.77095963	0.164812447	0.55921814
SFI1	35.95798791	63.38380113	-0.817801886	0.164941814	0.559300677
TIM13	320.9204727	274.6803046	0.224462359	0.165005059	0.559300677
DPB4	162.7362625	224.4124457	-0.463616927	0.165288239	0.559689723
YKR075C	127.0497009	97.54490837	0.381254504	0.165223433	0.559689723
HSV2	88.56371779	63.70528561	0.475302708	0.165507675	0.560147412
YOR238W	40.24842968	68.60740527	-0.769431808	0.166412049	0.560589365
MSO1	154.3088993	213.9697104	-0.471585315	0.165898199	0.560589365
RPS21B	553.4452974	710.3806032	-0.360151462	0.166644003	0.560589365
SUB1	188.2719289	152.8784634	0.300432729	0.166174573	0.560589365
RPA190	121.4407709	92.51550588	0.392485763	0.166243474	0.560589365
SHB17	75.53440972	51.82884599	0.543378743	0.166270839	0.560589365
PEX5	54.39370403	87.16581449	-0.680322765	0.16675816	0.560668433
YDR374W-A	65.70510469	101.8112186	-0.631819177	0.16686796	0.56075396
SEC3	88.99875154	131.7045246	-0.565447906	0.167530191	0.561276804
YOR248W	314.5070796	269.1700187	0.224574768	0.167516717	0.561276804
RNQ1	40.09044693	23.56046399	0.76689055	0.167398548	0.561276804
AXL2	25.53566638	0	Inf	0.16747715	0.561276804
GCY1	168.384107	134.3170722	0.326113287	0.167618126	0.561288504
AIR2	20.52867755	41.48157282	-1.014829904	0.167824768	0.561529319
HOL1	51.88025818	33.01259371	0.652169167	0.168251043	0.561992303
PFK2	183.8134173	148.6757945	0.306072293	0.168730866	0.563311936
UGO1	30.50257836	55.80996547	-0.871591556	0.168980295	0.563578536
CAJ1	206.2236097	169.4961327	0.282957154	0.168975282	0.563578536
YNL092W	0	31.3285013	#NAME?	0.169358136	0.56455543
ASE1	60.80709709	40.07968921	0.601368396	0.16948378	0.564691069
DIT1	20.16371053	40.783613	-1.016228441	0.170372645	0.565003669
CDC50	26.54265141	49.95055194	-0.912188127	0.170407421	0.565003669
CPS1	70.67201666	108.6234531	-0.620124649	0.170465509	0.565003669
AKL1	115.6203943	166.6272331	-0.527228312	0.170614749	0.565003669
FUN12	109.6809495	158.0672648	-0.527225656	0.170588978	0.565003669
YCF1	126.5312134	180.7052377	-0.514145002	0.170557199	0.565003669
FRA2	211.8515513	174.6456585	0.278622914	0.170262238	0.565003669
MET22	107.7649825	81.49911161	0.403032222	0.169777927	0.565003669
MDM31	43.7388707	26.86948038	0.70294755	0.170682619	0.565003669
YIR007W	33.39554055	0	Inf	0.170323179	0.565003669
NOG2	0	37.24708327	#NAME?	0.170455009	0.565003669
SEC66	92.92868862	136.8008459	-0.557881197	0.171053082	0.56594815
MLP1	144.8935629	201.556201	-0.476188667	0.171188947	0.566115885
MEH1	68.9630339	106.0123965	-0.620337826	0.171700986	0.567526831
PRE2	198.2057528	270.033046	-0.446137135	0.172063915	0.568161371
YMR321C	47.14585801	29.44871624	0.678926285	0.172045977	0.568161371
MSH6	0	20.75669677	#NAME?	0.172165052	0.568213057
CBK1	41.33440609	69.52840546	-0.750259346	0.172373294	0.568335954
MRP8	352.8695322	458.6594605	-0.378288529	0.172338832	0.568335954
RAS1	71.75799307	109.832626	-0.614095227	0.173079012	0.570379867
CPR3	158.1598451	217.4060097	-0.459008458	0.173165342	0.570381578
MOT1	34.27453268	59.630195	-0.798906059	0.173578475	0.570550354
CTF8	41.69491078	70.03663661	-0.748238501	0.17364576	0.570550354
FKS1	170.577125	136.5444939	0.32105305	0.173543576	0.570550354
MND2	42.85987856	26.64793101	0.685604238	0.173640709	0.570550354
YEF3	873.3332575	796.3702611	0.133092933	0.173811077	0.570811379
SEC62	361.6184855	469.1964624	-0.375723707	0.173928121	0.570913688
PRO2	140.4695035	109.831135	0.354969861	0.174306934	0.571874722
PUF3	125.7567402	97.48126696	0.36743882	0.174942196	0.573520231
CDC40	71.52101894	49.44082979	0.532664333	0.175067331	0.573520231
FRT2	21.17069556	0	Inf	0.175036628	0.573520231
RPL30	1692.310292	1535.778766	0.140023711	0.175180477	0.573608191
PSE1	27.86560194	51.83033699	-0.895311456	0.175896808	0.573771435
SEC39	26.77962554	49.50298021	-0.886379594	0.175753476	0.573771435
PUS5	29.26308152	53.23072961	-0.863177641	0.175880354	0.573771435
SPG3	39.36943755	66.69579951	-0.760519802	0.175418639	0.573771435
CCT7	103.8650353	151.2838691	-0.542548094	0.175343735	0.573771435
TOD6	83.46881293	60.10511446	0.473749496	0.176031216	0.573771435
GTB1	0	33.71353552	#NAME?	0.175685787	0.573771435
KAP123	91.76818317	66.97949931	0.454274454	0.176540237	0.574382258
SSS1	343.1281432	444.8410854	-0.374542582	0.176666885	0.574513105
MSS2	51.95478723	33.42834473	0.63618477	0.176798918	0.574661325
DEG1	60.49113159	94.77743484	-0.647819966	0.177027069	0.575121665
ACO2	25.89617108	48.51833861	-0.905791348	0.177383142	0.575454221
YAP1	91.04717378	133.4219287	-0.551309662	0.177389153	0.575454221
CDC31	97.57517277	72.58405177	0.426861519	0.177939327	0.576676111
DON1	33.71150605	58.67588312	-0.79952657	0.178038099	0.576715032
TAD1	41.01844058	25.43726705	0.689328968	0.178152754	0.576778418
YOL019W	39.24144466	23.30411192	0.751793619	0.178231213	0.576778418
ROD1	37.56245176	64.53529665	-0.780797205	0.178574184	0.577607105
KRE9	182.6184597	148.8018818	0.295439834	0.178712914	0.57777468
DUG1	232.7306466	192.4195917	0.274405503	0.178900144	0.577927817
YOR093C	0	25.43726705	#NAME?	0.178934173	0.577927817
YPL150W	33.91402799	58.8959415	-0.796286077	0.17914505	0.578047158
GSY2	105.0790046	79.39926818	0.404276823	0.17911533	0.578047158
TFC1	23.73314292	44.7935712	-0.916388525	0.179986644	0.580360922
MUM2	24.53314368	45.96943246	-0.905942742	0.180211365	0.580360922
APS1	63.6656071	98.37164202	-0.627728262	0.180102779	0.580360922
RMP1	0	39.31808798	#NAME?	0.180182583	0.580360922
YTA12	95.37769242	139.2828333	-0.546293672	0.180349772	0.580512415
PPG1	74.16245768	51.38276526	0.529404521	0.18049017	0.580512415
YKL071W	57.84969285	38.45625623	0.589090978	0.180607744	0.580512415
NBP1	45.62484786	28.27136399	0.690478258	0.180533667	0.580512415
GPX1	22.48918376	42.88345643	-0.931189893	0.18080098	0.580852642
GOS1	29.18409015	53.00918023	-0.861060139	0.181645775	0.583003121
CUS2	74.96692076	52.08370707	0.525422009	0.181590441	0.583003121
MSB2	39.36943755	66.21789807	-0.750145115	0.181817173	0.583271597
ENT1	43.01339899	71.81946854	-0.739588837	0.182917209	0.586234661
SPC72	0	32.02795211	#NAME?	0.183022658	0.586289932
NRG1	58.16565836	91.27123482	-0.649992628	0.18322955	0.586335842
CDC33	305.5357015	262.5153968	0.218938927	0.183176707	0.586335842
ECM21	49.47133124	81.05303088	-0.712273413	0.18377406	0.587281817
ARO8	99.74712557	74.62323577	0.418650349	0.183768905	0.587281817
GYP1	55.36623687	86.91244441	-0.650556294	0.184294925	0.587365835
MBR1	115.6593088	89.07592926	0.376773852	0.184330545	0.587365835
SPE2	110.9739102	85.28901143	0.379788758	0.184068273	0.587365835
EXO1	21.97069632	0	Inf	0.184273901	0.587365835
HPC2	0	33.20381337	#NAME?	0.184205932	0.587365835
STD1	0	34.41298633	#NAME?	0.18390362	0.587365835
RPS28B	184.0204016	250.8664705	-0.44705394	0.184555875	0.587688858
PTC3	191.5108464	157.9670343	0.277802585	0.184608746	0.587688858
TMA22	169.3331658	136.5778056	0.31014151	0.185587833	0.590522893
SNZ1	1765.284579	1605.491622	0.136885641	0.185696736	0.590586701
KNS1	214.4294392	178.4400313	0.265063682	0.185864529	0.590837648
TDA7	108.7675052	83.18767701	0.386805873	0.18623287	0.591725567
MRPL28	127.286675	99.68104549	0.352690294	0.186817207	0.593298602
OSW5	57.77070147	90.79333338	-0.652248357	0.187190075	0.593915239
YBR141C	0	30.37269842	#NAME?	0.187138824	0.593915239
ASI2	66.35158502	45.97092345	0.529409282	0.187791648	0.595539638
PBP1	232.2376867	193.4663838	0.263519197	0.187900726	0.595601395
PAB1	173.5580032	140.6195845	0.303620357	0.188522336	0.597286925
MDL2	241.351607	201.9701656	0.256994235	0.188921712	0.598267088
ARG82	20.08471915	39.98720907	-0.993440303	0.189287825	0.598728565
PDR3	22.04968769	42.40704599	-0.943545768	0.189194549	0.598728565
YDR333C	29.75157911	53.06983966	-0.834925947	0.189444779	0.598728565
YFH1	106.7089959	81.52944133	0.388288771	0.189517813	0.598728565
JIP5	94.12364626	70.20050854	0.423075729	0.189374831	0.598728565
YLR177W	103.6280611	78.66650567	0.397593313	0.189988575	0.599122837
EGT2	63.38409378	43.77263591	0.534091579	0.189924986	0.599122837
RPA43	37.96749564	22.60317012	0.748239715	0.189747309	0.599122837
PRP4	0	35.11541913	#NAME?	0.19000315	0.599122837
RPB5	133.2561097	104.5498535	0.350010641	0.190374517	0.599724841
AGE1	28.30509801	0	Inf	0.190365836	0.599724841
SGT1	120.2713408	170.1607808	-0.500605652	0.19051263	0.599875629
YFR006W	56.89170934	89.27013091	-0.649959113	0.190904832	0.600825954
ROT2	44.61786283	73.48068621	-0.719743688	0.191858957	0.603301368
KAP120	45.62038554	74.71869789	-0.711790675	0.192168017	0.603301368
ASM4	63.54207653	43.83776832	0.535537882	0.192207509	0.603301368
YKL075C	0	26.39456093	#NAME?	0.192235941	0.603301368
EXG1	338.8911652	296.0698288	0.194884548	0.192586403	0.603753989
YNG2	133.5821622	105.3462574	0.342588311	0.192537249	0.603753989
YGL036W	97.29812177	73.35161698	0.407583186	0.192683354	0.603753989
RRF1	24.25163036	0	Inf	0.192743488	0.603753989
ALG9	36.03697928	61.76036815	-0.777203267	0.193093598	0.604425646
MGR3	100.8286396	76.0887608	0.406150213	0.193139773	0.604425646
ATG19	168.4930882	228.3269418	-0.438411691	0.193395178	0.604710243
RXT2	86.51529555	63.63866221	0.44305171	0.193436983	0.604710243
FAA3	24.814657	45.4626923	-0.87349061	0.194357676	0.605386818
PEX4	40.529943	67.43005302	-0.734403586	0.19430687	0.605386818
TRM82	42.2923896	69.50105773	-0.716636857	0.194032789	0.605386818
DER1	49.07637436	80.00474786	-0.705056949	0.194163818	0.605386818
UIP3	73.85095449	110.7292605	-0.584348036	0.194221444	0.605386818
CRM1	155.9778052	212.7575555	-0.44786961	0.194316895	0.605386818
ORM1	0	28.9723058	#NAME?	0.194253957	0.605386818
AVO1	31.87006807	55.84029519	-0.809104467	0.1947263	0.605757417
PKH2	103.4300015	148.8988349	-0.525677742	0.194604655	0.605757417
TMA19	124.1178242	97.35368872	0.350402763	0.194750053	0.605757417
MSR1	0	37.72498471	#NAME?	0.195289219	0.607113728
KEG1	44.30189733	72.58554276	-0.712313741	0.195642064	0.6074019
YDR131C	0	29.92661768	#NAME?	0.195644271	0.6074019
NUP170	47.22484938	77.04456368	-0.706146967	0.196008328	0.607429806
VPS21	242.625556	203.8499506	0.251223912	0.195897439	0.607429806
YMR155W	62.14013463	43.13682652	0.526605323	0.195934507	0.607429806
YDR239C	45.25988084	28.77810415	0.653261233	0.196018795	0.607429806
NKP1	31.35158063	55.13935338	-0.814544169	0.196159679	0.607469544
DED81	407.7472714	359.2395355	0.182729091	0.196307075	0.607469544
CPR2	340.2262563	297.8265086	0.192022313	0.196488569	0.607469544
YHR007C-A	192.073873	159.2749468	0.270141933	0.196318171	0.607469544
GFD2	37.404469	22.41195046	0.738942442	0.19640979	0.607469544
BNA2	72.51345464	108.9131168	-0.586857101	0.197805357	0.611256257
YLR050C	20.08471915	38.90382795	-0.953813828	0.19798768	0.611535366
PHO5	100.2210738	76.34063988	0.392662717	0.198218987	0.611681341
ERG7	58.73314731	39.63509947	0.567396352	0.198560834	0.612347483
UBX4	37.04396431	21.93404902	0.756066341	0.198619103	0.612347483
MAK3	25.69811146	46.70219497	-0.861828017	0.198831666	0.612718631
ABP1	75.32742545	111.616949	-0.567308989	0.199136378	0.613373264
BER1	99.22863813	75.384837	0.396482186	0.199477281	0.613570333
ALG8	0	36.3231011	#NAME?	0.2000194	0.614953263
TOS1	324.5332819	283.0523306	0.197297636	0.20014348	0.615050258
TLG2	78.97138689	115.75419	-0.551662484	0.20045722	0.615729732
MCX1	72.28094283	51.19005461	0.497751779	0.200593131	0.615862606
YPT53	48.55226224	79.11556838	-0.704423099	0.20072741	0.615990349
ADE5/7	133.3841026	105.535986	0.33785171	0.20106596	0.616175859
SNF3	30.91208456	54.18802348	-0.80980308	0.201368652	0.616819093
DFG5	60.61466215	93.34223953	-0.622863271	0.201619844	0.617019843
DCS2	332.9573451	427.4704654	-0.360487379	0.201556046	0.617019843
KDX1	21.89170494	41.70610418	-0.929874238	0.202532112	0.618021799
GIP4	31.22805007	54.69327265	-0.808520903	0.202691067	0.618021799
GTO1	46.78535332	75.4196397	-0.68888331	0.202504763	0.618021799
[truncated: 3,027 more rows]
