# Supplementary material for: Temporal profiling of redox-dependent heterogeneity in single cells
Source: eLife journal article supplement (doi:10.7554/elife.37623), 2018-06-05
Supplement: supp [file elife-37623-supp-v1.zip › elife_poa_e37623_Supplementary_File_8.csv]

Row	Oxidized_48h	Reduced_48h	log_FoldChange	Pvalue	FDR_adjusted	Entry	Entry name	Protein names	Gene names
ACS1	345.740488	823.8149647	-1.252630773	9.65E-11	2.21E-08	Q01574	ACS1_YEAST	Acetyl-coenzyme A synthetase 1 (EC 6.2.1.1) (Acetate--CoA ligase 1) (Acyl-activating enzyme 1)	ACS1 YAL054C FUN44
OM14	868.6547166	1933.951896	-1.154697174	7.95E-11	1.89E-08	P38325	OM14_YEAST	Mitochondrial outer membrane protein OM14 (Outer membrane protein of 14 kDa)	OM14 YBR230C YBR1527
PHO89	191.3413794	394.8752272	-1.045247958	8.15E-05	0.005261953	P38361	PHO89_YEAST	Phosphate permease PHO89 (Na(+)/Pi cotransporter PHO89)	PHO89 ITN1 YBR296C YBR2113
CIT2	1203.661195	1868.751353	-0.634645263	0.000457762	0.021890248	P08679	CISY2_YEAST	Citrate synthase, peroxisomal (EC 2.3.3.16)	CIT2 YCR005C YCR043 YCR5C
ADY2	823.3867446	2408.754959	-1.548645508	2.54E-19	2.11E-16	P25613	ADY2_YEAST	Accumulation of dyads protein 2 (Ammonia transport outward protein 1)	ADY2 ATO1 YCR010C YCR10C
RPL41B	3402.553474	5608.279269	-0.720940356	4.20E-08	6.34E-06	P0CX28	RL41B_YEAST	60S ribosomal protein L41-B (L47) (Large ribosomal subunit protein eL41-B) (YL41)	RPL41B RPL47B YL41B YDL133C-A YDL133BC
NSE4	0	22.79242213	#NAME?	0.000833327	0.035057752	P0CX87	NSE4_YEAST	Non-structural maintenance of chromosome element 4 (Non-SMC element 4) (Protein QRI2)	NSE4 QRI2 YDL105W D2354
NDE2	102.5869201	349.7808189	-1.769604379	1.31E-09	2.80E-07	P43124	NDH2_YEAST	External NADH-ubiquinone oxidoreductase 2, mitochondrial (EC 1.6.5.9) (External NADH dehydrogenase 2)	NDE2 NDH2 YDL085W
YDL012C	191.3839897	423.7519589	-1.146749892	8.24E-06	0.000771135	Q07500	YD012_YEAST	Cysteine-rich and transmembrane domain-containing protein YDL012C	YDL012C D2880
YDR034W-B	169.2197293	384.848035	-1.185391099	1.48E-05	0.001245306	Q12489	YD34B_YEAST	Cysteine-rich and transmembrane domain-containing protein YDR034W-B	YDR034W-B
ENA2	77.64417068	227.3173244	-1.54975812	9.11E-06	0.00082913	Q6Q5X2	ATN2_YEAST	Sodium transport ATPase 2 (EC 3.6.3.7)	ENA2 PMR2B YDR039C
ENA1	80.34563507	273.6093529	-1.767825994	5.07E-08	7.48E-06	Q01896	ATN1_YEAST	Sodium transport ATPase 1 (EC 3.6.3.7)	ENA1 HOR6 PMR2 PMR2A YDR040C YD6888.02C
FMP16	923.5318632	1908.240584	-1.04700943	3.84E-09	7.08E-07	P13587	FMP16_YEAST	Protein FMP16, mitochondrial (Found in mitochondrial proteome protein 16)	FMP16 YDR070C
COX26	241.4198704	444.1009985	-0.879343391	0.000512746	0.023504988	Q2V2P9	YD19A_YEAST	Uncharacterized protein YDR119W-A	COX26,YDR119W-A
CTA1	112.3890869	272.5325166	-1.277926417	4.23E-05	0.002957191	P15202	CATA_YEAST	Peroxisomal catalase A (EC 1.11.1.6)	CTA1 YDR256C YD9320A.06C
ATO3	105.6713497	284.4854051	-1.428770363	4.58E-06	0.00046802	Q12359	ATO3_YEAST	Ammonia transport outward protein 3	ATO3 YDR384C D9481.20 D9509.4
STL1	0	67.51183762	#NAME?	1.08E-06	0.000127649	P39932	STL1_YEAST	Sugar transporter STL1	STL1 YDR536W D9719.39
FAA2	110.3817052	234.6051416	-1.087733553	0.000782034	0.03332166	P39518	LCF2_YEAST	Long-chain-fatty-acid--CoA ligase 2 (EC 6.2.1.3) (Fatty acid activator 2) (Long-chain acyl-CoA synthetase 2)	FAA2 FAM1 YER015W
YAT2	201.824844	457.3732332	-1.180268161	2.68E-06	0.000287613	P40017	YAT2_YEAST	Carnitine O-acetyltransferase YAT2 (EC 2.3.1.7)	YAT2 YER024W
ICL1	754.3653712	2681.146591	-1.829514744	1.20E-26	1.59E-23	P28240	ACEA_YEAST	Isocitrate lyase (ICL) (EC 4.1.3.1) (Methylisocitrate lyase) (MICA) (EC 4.1.3.30) (Threo-D(S)-isocitrate glyoxylate-lyase)	ICL1 YER065C
RAD51	25.48127344	94.86370297	-1.896418806	0.000558172	0.025412099	P25454	RAD51_YEAST	DNA repair protein RAD51	RAD51 YER095W
FTR1	189.8545599	405.4084822	-1.094481624	3.16E-05	0.002281361	P40088	FTR1_YEAST	Plasma membrane iron permease	FTR1 YER145C
YER163C	149.4150688	353.6808246	-1.243122349	1.05E-05	0.000946517	P32656	CHAC_YEAST	Glutathione-specific gamma-glutamylcyclotransferase (Gamma-GCG) (EC 2.3.2.-)	GCG1 YER163C SYGP-ORF3
POX1	97.54381771	390.1833767	-2.000029971	2.93E-12	8.84E-10	P13711	ACOX_YEAST	Acyl-coenzyme A oxidase (Acyl-CoA oxidase) (EC 1.3.3.6)	POX1 FOX1 YGL205W
OLE1	400.4995092	1024.582706	-1.355164066	3.90E-13	1.53E-10	P21147	ACO1_YEAST	Acyl-CoA desaturase 1 (EC 1.14.19.1) (Delta 9 fatty acid desaturase) (Fatty acid desaturase 1) (Stearoyl-CoA desaturase 1)	OLE1 YGL055W
YGR035C	0	82.00305535	#NAME?	0.000281017	0.014943382	P53222	YG1O_YEAST	Uncharacterized protein YGR035C	YGR035C
YGR067C	126.5761971	405.0178626	-1.677979409	2.21E-09	4.46E-07	P53243	YG2A_YEAST	Zinc finger protein YGR067C	YGR067C
SPG1	776.9430706	1642.324824	-1.079858699	2.09E-09	4.33E-07	P50088	SPG1_YEAST	Stationary phase gene 1 protein	SPG1 YGR236C G8578
FMP43	505.0399251	927.7128935	-0.87728095	3.51E-06	0.000364875	P53311	MPC3_YEAST	Mitochondrial pyruvate carrier 3 (MPC3) (Protein FMP43)	MPC3 FMP43 YGR243W G8620
HXT5	455.4266009	1121.472317	-1.300103544	2.36E-12	7.83E-10	P38695	HXT5_YEAST	Probable glucose transporter HXT5	HXT5 YHR096C
SPS100	450.8285455	1281.731797	-1.507443637	2.06E-16	1.27E-13	P13130	SS100_YEAST	Sporulation-specific wall maturation protein	SPS100 YHR139C
POT1	87.50540013	223.2537335	-1.351240346	9.05E-05	0.005786454	P27796	THIK_YEAST	3-ketoacyl-CoA thiolase, peroxisomal (EC 2.3.1.16) (Acetyl-CoA acyltransferase) (Beta-ketothiolase) (Peroxisomal 3-oxoacyl-CoA thiolase)	POT1 FOX3 POX3 YIL160C
GUT2	172.1358152	394.9386007	-1.198081081	8.74E-06	0.000807223	P32191	GPDM_YEAST	Glycerol-3-phosphate dehydrogenase, mitochondrial (GPD-M) (GPDH-M) (EC 1.1.5.3)	GUT2 YIL155C
RGI2	271.1320381	721.0926709	-1.411189081	3.62E-11	9.25E-09	P40188	RGI2_YEAST	Respiratory growth induced protein 2	RGI2 YIL057C
YIR016W	92.31074219	245.3812261	-1.410454425	1.72E-05	0.001426172	P40572	YIT6_YEAST	Uncharacterized protein YIR016W	YIR016W
DAL3	119.6633099	266.7648474	-1.156587696	0.000211997	0.011742884	P32459	ALLA_YEAST	Ureidoglycolate lyase (EC 4.3.2.3) (Degradation of allantoin protein 3) (Ureidoglycolatase) (Ureidoglycolate hydrolase)	DAL3 YIR032C
PEX2	67.29463556	169.473313	-1.332494701	0.001300067	0.049664066	P32800	PEX2_YEAST	Peroxisomal biogenesis factor 2 (Peroxin-2) (Peroxisomal protein PAS5) (Protein CRT1)	PEX2 CRT1 PAS5 YJL210W HRA271 J0240
YJL163C	37.37302337	116.2788219	-1.637519176	0.001233472	0.047392416	P46996	YJQ3_YEAST	Uncharacterized membrane protein YJL163C	YJL163C J0544
ARG3	75.8462336	184.1388731	-1.279644777	0.001038434	0.041833166	P05150	OTC_YEAST	Ornithine carbamoyltransferase (EC 2.1.3.3) (Ornithine transcarbamylase) (OTCase)	ARG3 YJL088W J0924
SFC1	213.7345558	644.2880756	-1.591885717	2.83E-12	8.84E-10	P33303	SFC1_YEAST	Succinate/fumarate mitochondrial transporter (Regulator of acetyl-CoA synthase activity)	SFC1 ACR1 YJR095W J1921
JEN1	277.7876935	497.469832	-0.840626352	0.000505324	0.023325612	P36035	JEN1_YEAST	Carboxylic acid transporter protein homolog	JEN1 YKL217W
TRP3	58.99358284	155.6892039	-1.40003897	0.001187992	0.046178834	P00937	TRPG_YEAST	Multifunctional tryptophan biosynthesis protein [Includes: Anthranilate synthase component 2 (AS) (EC 4.1.3.27) (Anthranilate synthase, glutamine amidotransferase component); Indole-3-glycerol phosphate synthase (EC 4.1.1.48) (PRAI)]	TRP3 YKL211C
YKL187C	83.55336704	205.1473502	-1.295890648	0.000317527	0.016361236	P34231	YKS7_YEAST	Uncharacterized protein YKL187C	YKL187C
FAS1	660.5663	1079.877009	-0.709091733	0.000175848	0.010076367	P07149	FAS1_YEAST	Fatty acid synthase subunit beta (EC 2.3.1.86) [Includes: 3-hydroxyacyl-[acyl-carrier-protein] dehydratase (EC 4.2.1.59); Enoyl-[acyl-carrier-protein] reductase [NADH] (EC 1.3.1.9); [Acyl-carrier-protein] acetyltransferase (EC 2.3.1.38); [Acyl-carrier-protein] malonyltransferase (EC 2.3.1.39); S-acyl fatty acid synthase thioesterase (EC 3.1.2.14)]	FAS1 YKL182W
YKL107W	0	91.26997593	#NAME?	1.33E-05	0.00113229	P34251	YKK7_YEAST	Uncharacterized oxidoreductase YKL107W (EC 1.-.-.-)	YKL107W YKL462
GAP1	82.29395397	303.4046765	-1.882384976	3.00E-09	5.69E-07	P19145	GAP1_YEAST	General amino-acid permease GAP1	GAP1 YKR039W
PCK1	526.5618306	1817.009314	-1.786890962	3.32E-23	3.68E-20	P10963	PCKA_YEAST	Phosphoenolpyruvate carboxykinase (ATP) (EC 4.1.1.49)	PCK1 PEPC PPC1 YKR097W
SHH4	30.57826161	137.1343953	-2.165012169	5.31E-06	0.000524934	Q06236	SHH4_YEAST	Mitochondrial inner membrane protein SHH4 (SDH4 homolog)	SHH4 YLR164W
IDP2	105.5763632	367.8029369	-1.800646125	3.24E-10	7.18E-08	P41939	IDHC_YEAST	Isocitrate dehydrogenase [NADP] cytoplasmic (IDH) (EC 1.1.1.42) (IDP) (NADP(+)-specific ICDH) (Oxalosuccinate decarboxylase)	IDP2 YLR174W L9470.12
ECI1	114.4144304	306.0641849	-1.419565211	2.23E-06	0.000251128	Q05871	ECI1_YEAST	3,2-trans-enoyl-CoA isomerase (EC 5.3.3.8) (Delta(3),Delta(2)-enoyl-CoA isomerase) (D3,D2-enoyl-CoA isomerase) (Dodecenoyl-CoA isomerase)	ECI1 YLR284C
CDA1	44.16778512	154.3962416	-1.805571241	7.25E-05	0.004819186	Q06702	CDA1_YEAST	Chitin deacetylase 1 (EC 3.5.1.41)	CDA1 YLR307W L2142.2
YLR307C-A	1044.343147	3602.511546	-1.786407228	1.98E-32	6.60E-29	Q3E825	YL307_YEAST	Uncharacterized protein YLR307C-A	YLR307C-A
YLR312C	212.7488269	405.9203567	-0.932045515	0.000307246	0.01608084	Q06159	ATG39_YEAST	Autophagy-related protein 39	ATG39 YLR312C
FBP1	245.357609	671.9248567	-1.453413888	5.56E-11	1.37E-08	P09201	F16P_YEAST	Fructose-1,6-bisphosphatase (FBPase) (EC 3.1.3.11) (D-fructose-1,6-bisphosphate 1-phosphohydrolase)	FBP1 YLR377C L8039.18
CAT2	278.6784358	611.4689322	-1.133677829	4.14E-07	5.20E-05	P32796	CACP_YEAST	Carnitine O-acetyltransferase, mitochondrial (Carnitine acetylase) (EC 2.3.1.7)	CAT2 CAT YCAT YML042W YM8054.01
ARA2	0	30.57107063	#NAME?	0.000974989	0.040004655	Q04212	ARA2_YEAST	D-arabinose 1-dehydrogenase (EC 1.1.1.116) (NAD(+)-specific D-arabinose dehydrogenase)	ARA2 YMR041C YM9532.06C
PAI3	596.0681154	924.2667295	-0.632832049	0.001113288	0.043846647	P01094	IPA3_YEAST	Protease A inhibitor 3 (Proteinase inhibitor I(A)3) (Proteinase yscA-inhibitor) (Saccharopepsin inhibitor)	PAI3 YMR174C YM8010.04C
SPG5	371.1806606	622.2130481	-0.745287105	0.000598311	0.026776965	P42933	SPG5_YEAST	Stationary phase protein 5	SPG5 YMR191W YM9646.03
ADH2	1081.619675	2862.967491	-1.404317989	4.08E-18	3.01E-15	P00331	ADH2_YEAST	Alcohol dehydrogenase 2 (EC 1.1.1.1) (Alcohol dehydrogenase II) (YADH-2)	ADH2 ADR2 YMR303C YM9952.05C
MEP2	175.9697228	627.9661839	-1.83535965	9.20E-15	4.71E-12	P41948	MEP2_YEAST	Ammonium transporter MEP2	MEP2 AMT2 YNL142W N1207 N1820
MLS1	700.1360297	1865.152134	-1.413586155	4.27E-15	2.37E-12	P30952	MASY_YEAST	Malate synthase 1, glyoxysomal (EC 2.3.3.9)	MLS1 YNL117W N1921
NCE103	873.926735	1654.791151	-0.921064905	4.13E-07	5.20E-05	P53615	CAN_YEAST	Carbonic anhydrase (EC 4.2.1.1) (Carbonate dehydratase) (Non-classical export protein 3)	NCE103 NCE3 YNL036W N2695
IDP3	123.586754	313.2730775	-1.341896667	5.31E-06	0.000524934	P53982	IDHH_YEAST	Isocitrate dehydrogenase [NADP] (IDH) (EC 1.1.1.42) (IDP) (NADP(+)-specific ICDH) (Oxalosuccinate decarboxylase)	IDP3 YNL009W N2870
PEX11	147.9462112	299.5152766	-1.017556838	0.000496845	0.023094595	Q12462	PEX11_YEAST	Peroxisomal membrane protein PMP27 (Peroxin-11)	PEX11 PMP24 PMP27 YOL147C O0454
MDH2	1592.904835	4500.915061	-1.498558261	4.94E-28	8.20E-25	P22133	MDHC_YEAST	Malate dehydrogenase, cytoplasmic (EC 1.1.1.37)	MDH2 YOL126C
PHM7	119.2840121	321.0355525	-1.428332387	1.15E-06	0.000133587	Q12252	PHM7_YEAST	Phosphate metabolism protein 7	PHM7 YOL084W 00953
DDR2	3140.285763	5316.553154	-0.759595367	2.42E-09	4.73E-07	P89113	DDR2_YEAST	Protein DDR2	DDR2 YOL052C-A YOL052BC YOL053C-A
YOL047C	0	22.50216564	#NAME?	0.000858735	0.035899449	Q08218	LDS2_YEAST	Outer spore wall protein LDS2 (Lipid droplets in sporulation protein 2)	LDS2 YOL047C
ROD1	0	52.26576459	#NAME?	2.88E-05	0.002129772	Q02805	ROD1_YEAST	Protein ROD1 (Resistance to o-dinitrobenzene protein 1)	ROD1 YOR018W OR26.08
CRC1	91.65776021	296.8449354	-1.695380562	6.65E-08	9.60E-06	Q12289	CRC1_YEAST	Mitochondrial carnitine carrier	CRC1 YOR100C YOR3193C
PNS1	51.13606757	155.5835757	-1.605276645	0.000273888	0.01468174	Q12412	PNS1_YEAST	Protein PNS1 (pH nine-sensitive protein 1)	PNS1 YOR161C O3568
TRE2	0	44.29714701	#NAME?	0.001121398	0.043846647	Q08693	TRE2_YEAST	Putative zinc metalloprotease TRE2 (EC 3.-.-.-) (Transferrin receptor-like protein 2)	TRE2 YOR256C
ISW2	0	45.33157738	#NAME?	0.000725017	0.031705169	Q08773	ISW2_YEAST	ISWI chromatin-remodeling complex ATPase ISW2 (EC 3.6.4.-) (Imitation switch protein 2)	ISW2 YOR304W
ALD4	378.5422622	812.7324503	-1.10232612	1.24E-08	2.01E-06	P46367	ALDH4_YEAST	Potassium-activated aldehyde dehydrogenase, mitochondrial (EC 1.2.1.5) (K(+)-activated acetaldehyde dehydrogenase) (K(+)-ACDH)	ALD4 ALD7 ALDH2 YOR374W O6730
GRE1	1438.229399	2205.680322	-0.616929905	0.000414156	0.020543987	Q08969	GRE1_YEAST	Protein GRE1 (Genes de respuesta a estres protein 1) (Hydrophilin)	GRE1 YPL223C
PRP46	115.3821974	281.7254579	-1.287869294	3.03E-05	0.002214227	Q12417	PRP46_YEAST	Pre-mRNA-splicing factor PRP46 (Complexed with CEF1 protein 1) (PRP nineteen-associated complex protein 50) (PRP19-associated complex protein 50) (Pre-mRNA-processing protein 46)	PRP46 CWC1 NTC50 YPL151C P2594
LSP1	680.4248462	1109.344859	-0.705200194	0.000193846	0.011012752	Q12230	LSP1_YEAST	Sphingolipid long chain base-responsive protein LSP1	LSP1 YPL004C
ICL2	144.6240213	296.3910937	-1.0351949	0.000441077	0.021400277	Q12031	ACEB_YEAST	Mitochondrial 2-methylisocitrate lyase (Methylisocitrate lyase) (EC 4.1.3.30)	ICL2 YPR006C LPZ6C YP9723.06C
YPR036W-A	1671.281819	2895.048668	-0.792632574	3.25E-07	4.23E-05	Q3E752	YP036_YEAST	Uncharacterized protein YPR036W-A	YPR036W-A
