# Supplementary material for: Temporal profiling of redox-dependent heterogeneity in single cells
Source: eLife journal article supplement (doi:10.7554/elife.37623), 2018-06-05
Supplement: supp [file elife-37623-supp-v1.zip › elife_poa_e37623_Supplementary_File_9.csv]

Row	Oxidized_48h	Reduced_48h	log_FoldChange	Pvalue	FDR_adjusted
SSA3	1983.629632	1307.505011	0.601326207	2.08E-05	0.001630265
YRO2	1533.2559	752.1701996	1.027467448	8.01E-12	2.32E-09
HSP26	33288.40199	19870.59288	0.744384696	1.93E-29	4.27E-26
YBR072C-A	1168.457798	787.0529387	0.570073046	0.000101739	0.006371453
UBC4	1738.105462	1213.676209	0.518132039	0.000263849	0.014258549
YBR085C-A	1667.80407	1131.51993	0.559687818	0.000109895	0.006640649
YBR298C-A	153.9324322	69.79155923	1.141172758	0.001005911	0.041020181
GRX1	1442.860572	951.6716066	0.60039616	3.72E-05	0.002657642
HSP30	8384.98817	4038.272315	1.054070548	1.79E-22	1.70E-19
THI13	651.3602105	397.5766706	0.712222489	2.25E-05	0.001736278
STP4	596.9034624	279.0867656	1.096783909	6.92E-09	1.15E-06
ATP16	676.1093194	430.7970393	0.650248198	5.72E-05	0.003916813
YDR183C-A	50.19143947	0	Inf	7.00E-05	0.004701749
ATC1	50.19143947	0	Inf	7.00E-05	0.004701749
RAD9	66.29094475	0	Inf	0.000198282	0.011169305
ATP5	345.8729079	205.611949	0.750317904	0.000938809	0.039001638
HXT7	2257.499707	1027.474363	1.135623404	2.76E-14	1.15E-11
HXT6	7859.778266	2939.344873	1.418993973	3.41E-36	2.27E-32
TSA2	297.379242	118.0043387	1.333464042	2.34E-07	3.10E-05
QCR7	2365.755905	1660.284039	0.510871149	7.98E-05	0.005205652
RGI1	3783.017624	1944.256401	0.960319009	1.31E-14	6.23E-12
SPI1	4029.579251	2630.382538	0.615356581	4.01E-08	6.20E-06
YFR016C	198.7352374	102.1991912	0.959463918	0.001030787	0.041778315
YFR052C-A	2969.890605	1552.848927	0.93549231	1.47E-12	5.41E-10
HXK1	3138.065543	1675.397158	0.905372354	2.32E-12	7.83E-10
ZRT1	3268.851107	2074.927095	0.655723019	6.95E-08	9.83E-06
YGL188C	551.9219596	319.3047707	0.78953018	2.07E-05	0.001630265
COX4	600.8037677	396.9592437	0.597902968	0.00046196	0.021933218
HIP1	123.8747327	51.72224122	1.260025248	0.000749278	0.0323406
TDA3	92.08182622	28.61325441	1.68623285	0.000420966	0.020574732
FSH1	394.0749277	219.6916554	0.842989891	9.41E-05	0.005955572
COX6	395.4487987	237.3650131	0.73638361	0.000486724	0.022783464
HXT4	524.1699743	308.5815466	0.764382925	5.42E-05	0.003751522
YHR162W	739.9426586	484.4031932	0.611205099	0.000102564	0.006371453
SOL3	112.904472	39.2521375	1.524259506	0.000455906	0.021890248
AIM18	241.3197069	125.7196894	0.940735123	0.00036891	0.01843719
YIL169C	176.3615325	54.7777856	1.686873067	2.19E-06	0.000251128
SUC2	494.8228099	134.8916633	1.875110818	2.09E-16	1.27E-13
REE1	347.2969973	194.3131574	0.837786345	0.000288227	0.015205117
QCR8	1612.676651	1105.423962	0.54485741	0.000168647	0.009747776
YJL133C-A	909.768819	557.0335485	0.70773577	6.16E-06	0.000593327
NCA3	465.9819132	264.8172416	0.815276903	7.99E-05	0.005205652
SSC1	1024.138481	683.4769153	0.58344629	0.000108101	0.00659218
THI11	789.2716715	441.5149226	0.838059769	2.23E-07	3.03E-05
MDH1	980.6952526	619.1735259	0.663461107	1.75E-05	0.001439058
PHD1	700.1187162	298.6128582	1.229323286	9.91E-12	2.75E-09
UTH1	1584.472284	1132.021367	0.485101234	0.000689331	0.030344276
YKR075C	175.590425	80.04523913	1.133326674	0.000687891	0.030344276
YLL056C	358.5409422	182.1386508	0.977100768	2.88E-05	0.002129772
HSP104	2321.990557	1730.709123	0.423998831	0.000767151	0.032898383
COX17	679.0403481	411.5351221	0.72248174	1.13E-05	0.000998488
SHM2	974.6679308	510.6733525	0.932509997	6.32E-09	1.08E-06
PER33	266.2983802	146.9818288	0.857405846	0.000600236	0.026776965
AHP1	2981.587205	2101.434423	0.504706096	2.37E-05	0.001811946
SRN2	114.9118536	44.23384921	1.37730493	0.000745809	0.0323406
PDC5	434.2675408	229.5810239	0.919580723	1.81E-05	0.001464409
CPR6	1732.438615	1113.492791	0.637712017	1.29E-05	0.00111235
YLR271W	440.7115938	261.5400792	0.752802804	0.000322183	0.016473474
YLR294C	552.5569797	319.4683559	0.790450207	1.99E-05	0.001589886
ATP14	990.4757899	534.7904615	0.889147978	2.58E-08	4.08E-06
TMA10	7619.411425	5935.974287	0.360194716	0.00021189	0.011742884
CST9	79.03082672	25.07214374	1.656330144	0.001117132	0.043846647
COX8	904.9044142	603.774549	0.583755463	0.000143188	0.008409492
ATP18	2189.941366	1401.772649	0.643639863	3.46E-06	0.000364775
YML020W	40.07448776	0	Inf	0.00079399	0.033615598
HXT2	102.8106591	35.84303883	1.520224986	0.000580111	0.026231269
SIP18	4059.622008	2793.556114	0.539242604	7.25E-07	8.76E-05
YMR175W-A	1725.344599	1203.06371	0.520171493	0.000256167	0.013956926
COX7	2364.396329	1671.814584	0.500057035	0.000105414	0.00648783
URA10	683.0386589	449.2093058	0.60457942	0.000144228	0.008409492
THI12	722.0771995	434.3328092	0.733352151	5.37E-06	0.000524934
DUG3	302.0378697	141.9947764	1.088891589	1.25E-05	0.001092677
YGP1	1988.261727	1415.557078	0.490137757	0.000342767	0.017392135
COX5A	754.7541618	537.3867478	0.490046063	0.001217247	0.04704095
YNR034W-A	4060.731312	2338.356352	0.796244766	1.20E-11	3.20E-09
YNR071C	122.5240005	32.27027926	1.92478641	8.12E-06	0.000771135
HPF1	211.7630981	91.00602762	1.218417199	3.99E-05	0.002823375
ATP19	561.4413246	348.1186756	0.689556044	0.000128604	0.007642087
HSP10	2471.452176	1548.896625	0.67411813	4.38E-07	5.39E-05
VPS21	275.234453	145.7468236	0.917196632	0.000241712	0.013278161
HRK1	342.5738568	183.1414323	0.903456847	0.000128767	0.007642087
CPA1	1802.802464	1118.406411	0.688796791	2.65E-06	0.000287613
YOR338W	753.0055215	383.3548176	0.973980134	4.06E-09	7.29E-07
FIT2	2182.06287	979.8357377	1.155080852	1.84E-14	8.18E-12
FIT3	2799.45925	1760.386817	0.669255707	1.64E-07	2.28E-05
ATP15	1515.092969	1063.933886	0.50999782	0.000417707	0.020566672
HSP82	4250.117413	2722.064724	0.642801327	5.32E-09	9.31E-07
ATP4	1281.434118	841.8311196	0.60615656	2.45E-05	0.001852026
SUT2	91.76704125	28.06439033	1.709235375	0.000356327	0.017943235
YPR010C-A	830.0761659	567.6096805	0.548344526	0.000312078	0.016206115
YPR022C	82.40323502	27.00365177	1.609546457	0.000956856	0.039504478
