# Supplementary material for: Temporal profiling of redox-dependent heterogeneity in single cells
Source: eLife journal article supplement (doi:10.7554/elife.37623), 2018-06-05
Supplement: supp [file elife-37623-supp-v1.zip › elife_poa_e37623_Supplementary_File_10.csv]

Row	Oxidized_72h	Reduced_72h	log_FoldChange	Pvalue	FDR_adjusted	Entry	Entry name	Protein names	Gene names	Length	Gene ontology (GO)	Gene ontology (cellular component)	Gene ontology (biological process)	Gene ontology (molecular function)
ACS1	373.7186375	1116.223003	-1.578600865	1.70E-17	3.66E-15	Q01574	ACS1_YEAST	Acetyl-coenzyme A synthetase 1 (EC 6.2.1.1) (Acetate--CoA ligase 1) (Acyl-activating enzyme 1)	ACS1 YAL054C FUN44	713	cytosol [GO:0005829]; endoplasmic reticulum [GO:0005783]; mitochondrion [GO:0005739]; nucleus [GO:0005634]; acetate-CoA ligase activity [GO:0003987]; acid-ammonia (or amide) ligase activity [GO:0016880]; AMP binding [GO:0016208]; ATP binding [GO:0005524]; acetate fermentation [GO:0019654]; acetyl-CoA biosynthetic process [GO:0006085]; acetyl-CoA biosynthetic process from acetate [GO:0019427]; his…	cytosol [GO:0005829]; endoplasmic reticulum [GO:0005783]; mitochondrion [GO:0005739]; nucleus [GO:0005634]	acetate fermentation [GO:0019654]; acetyl-CoA biosynthetic process [GO:0006085]; acetyl-CoA biosynthetic process from acetate [GO:0019427]; histone acetylation [GO:0016573]	acetate-CoA ligase activity [GO:0003987]; acid-ammonia (or amide) ligase activity [GO:0016880]; AMP binding [GO:0016208]; ATP binding [GO:0005524]
RFA1	42.85541623	115.2807615	-1.427602316	0.001440339	0.023014265	P22336	RFA1_YEAST	Replication factor A protein 1 (RF-A protein 1) (DNA-binding protein BUF2) (Replication protein A 69 kDa DNA-binding subunit) (Single-stranded DNA-binding protein)	RFA1 BUF2 RPA1 YAR007C FUN3	621	chromosome, telomeric region [GO:0000781]; condensed nuclear chromosome [GO:0000794]; cytoplasm [GO:0005737]; cytosol [GO:0005829]; DNA replication factor A complex [GO:0005662]; nucleus [GO:0005634]; double-stranded DNA binding [GO:0003690]; metal ion binding [GO:0046872]; sequence-specific DNA binding [GO:0043565]; single-stranded DNA binding [GO:0003697]; DNA repair [GO:0006281]; DNA replicati…	chromosome, telomeric region [GO:0000781]; condensed nuclear chromosome [GO:0000794]; cytoplasm [GO:0005737]; cytosol [GO:0005829]; DNA replication factor A complex [GO:0005662]; nucleus [GO:0005634]	DNA repair [GO:0006281]; DNA replication [GO:0006260]; DNA topological change [GO:0006265]; DNA unwinding involved in DNA replication [GO:0006268]; double-strand break repair via homologous recombination [GO:0000724]; establishment of protein localization [GO:0045184]; heteroduplex formation [GO:0030491]; mitotic recombination [GO:0006312]; nucleotide-excision repair [GO:0006289]; protein ubiquit…	double-stranded DNA binding [GO:0003690]; metal ion binding [GO:0046872]; sequence-specific DNA binding [GO:0043565]; single-stranded DNA binding [GO:0003697]
YAT1	87.71471552	237.6880824	-1.438178766	9.13E-06	0.000287628	P80235	CACM_YEAST	Putative mitochondrial carnitine O-acetyltransferase (EC 2.3.1.7)	YAT1 YAR035W	687	mitochondrial inner membrane [GO:0005743]; mitochondrion [GO:0005739]; carnitine O-acetyltransferase activity [GO:0004092]; alcohol metabolic process [GO:0006066]; carnitine metabolic process [GO:0009437]; fatty acid metabolic process [GO:0006631]; transport [GO:0006810]	mitochondrial inner membrane [GO:0005743]; mitochondrion [GO:0005739]	alcohol metabolic process [GO:0006066]; carnitine metabolic process [GO:0009437]; fatty acid metabolic process [GO:0006631]; transport [GO:0006810]	carnitine O-acetyltransferase activity [GO:0004092]
PRX1	404.8733209	702.5831364	-0.795198369	0.000565542	0.01064917	P34227	PRX1_YEAST	Mitochondrial peroxiredoxin PRX1 (EC 1.11.1.15) (1-Cys PRX) (Mitochondrial thiol peroxidase) (mTPx) (Thioredoxin reductase)	PRX1 YBL064C YBL0503 YBL0524	261	mitochondrion [GO:0005739]; thioredoxin peroxidase activity [GO:0008379]; cell redox homeostasis [GO:0045454]; cellular response to oxidative stress [GO:0034599]; response to cadmium ion [GO:0046686]	mitochondrion [GO:0005739]	cell redox homeostasis [GO:0045454]; cellular response to oxidative stress [GO:0034599]; response to cadmium ion [GO:0046686]	thioredoxin peroxidase activity [GO:0008379]
ECM15	754.0422119	1257.931933	-0.738336666	1.46E-05	0.000428537	P35195	ECM15_YEAST	UPF0045 protein ECM15 (Extracellular mutant protein 15)	ECM15 YBL001C YBL0105	104	cytoplasm [GO:0005737]; nucleus [GO:0005634]	cytoplasm [GO:0005737]; nucleus [GO:0005634]
HHT1	463.6899219	751.9362544	-0.697449992	0.002133899	0.031507751	P61830	H3_YEAST	Histone H3	HHT1 YBR010W YBR0201; HHT2 SIN2 YNL031C N2749	136	CENP-A containing nucleosome [GO:0043505]; nuclear nucleosome [GO:0000788]; replication fork protection complex [GO:0031298]; DNA binding [GO:0003677]; nucleosomal DNA binding [GO:0031492]; protein heterodimerization activity [GO:0046982]; chromatin assembly or disassembly [GO:0006333]; global genome nucleotide-excision repair [GO:0070911]; nucleosome assembly [GO:0006334]; rRNA transcription [GO…	CENP-A containing nucleosome [GO:0043505]; nuclear nucleosome [GO:0000788]; replication fork protection complex [GO:0031298]	chromatin assembly or disassembly [GO:0006333]; global genome nucleotide-excision repair [GO:0070911]; nucleosome assembly [GO:0006334]; rRNA transcription [GO:0009303]; sexual sporulation resulting in formation of a cellular spore [GO:0043935]	DNA binding [GO:0003677]; nucleosomal DNA binding [GO:0031492]; protein heterodimerization activity [GO:0046982]
ETR1	337.1153316	693.9411249	-1.041571026	3.75E-06	0.000131933	P38071	ETR1_YEAST	Enoyl-[acyl-carrier-protein] reductase, mitochondrial (EC 1.3.1.104) (2-enoyl thioester reductase) (Mitochondrial respiratory function protein 1)	ETR1 MRF1 MRF1' YBR026C YBR0310	380	mitochondrial matrix [GO:0005759]; mitochondrion [GO:0005739]; DNA binding [GO:0003677]; enoyl-[acyl-carrier-protein] reductase activity [GO:0016631]; aerobic respiration [GO:0009060]; fatty acid biosynthetic process [GO:0006633]	mitochondrial matrix [GO:0005759]; mitochondrion [GO:0005739]	aerobic respiration [GO:0009060]; fatty acid biosynthetic process [GO:0006633]	DNA binding [GO:0003677]; enoyl-[acyl-carrier-protein] reductase activity [GO:0016631]
YPK3	0	55.14084437	#NAME?	0.002152026	0.031507751	P38070	YPK3_YEAST	Serine/threonine-protein kinase YPK3 (EC 2.7.11.1) (Ribosomal S6 kinase homolog YPK3) (S6K homolog YPK3)	YPK3 YBR028C YBR0312	525	cytoplasm [GO:0005737]; nucleus [GO:0005634]; ATP binding [GO:0005524]; protein serine/threonine kinase activity [GO:0004674]; intracellular signal transduction [GO:0035556]; peptidyl-serine phosphorylation [GO:0018105]; protein autophosphorylation [GO:0046777]	cytoplasm [GO:0005737]; nucleus [GO:0005634]	intracellular signal transduction [GO:0035556]; peptidyl-serine phosphorylation [GO:0018105]; protein autophosphorylation [GO:0046777]	ATP binding [GO:0005524]; protein serine/threonine kinase activity [GO:0004674]
CDS1	83.74586393	194.6773431	-1.216995146	0.000503267	0.009585141	P38221	CDS1_YEAST	Phosphatidate cytidylyltransferase (EC 2.7.7.41) (CDP-diacylglycerol synthase) (CDP-DAG synthase) (CDS) (CDP-diglyceride pyrophosphorylase) (CDP-diglyceride synthase) (CDP-DG synthase) (CTP:phosphatidate cytidylyltransferase)	CDS1 CDG1 YBR029C YBR0313	457	endoplasmic reticulum [GO:0005783]; endoplasmic reticulum membrane [GO:0005789]; Golgi to plasma membrane transport vesicle [GO:0070319]; integral component of membrane [GO:0016021]; phosphatidate cytidylyltransferase activity [GO:0004605]; CDP-diacylglycerol biosynthetic process [GO:0016024]; phosphatidylglycerol biosynthetic process [GO:0006655]; phosphatidylinositol metabolic process [GO:00464…	endoplasmic reticulum [GO:0005783]; endoplasmic reticulum membrane [GO:0005789]; Golgi to plasma membrane transport vesicle [GO:0070319]; integral component of membrane [GO:0016021]	CDP-diacylglycerol biosynthetic process [GO:0016024]; phosphatidylglycerol biosynthetic process [GO:0006655]; phosphatidylinositol metabolic process [GO:0046488]; phosphatidylserine metabolic process [GO:0006658]	phosphatidate cytidylyltransferase activity [GO:0004605]
QDR3	31.14905869	87.900068	-1.496675715	0.003592845	0.04601472	P38227	QDR3_YEAST	Quinidine resistance protein 3 (Acids quinidine resistance protein 2)	QDR3 AQR2 YBR043C YBR0413	689	integral component of membrane [GO:0016021]; plasma membrane [GO:0005886]; drug transmembrane transporter activity [GO:0015238]; polyamine transmembrane transporter activity [GO:0015203]; ascospore wall assembly [GO:0030476]; drug transmembrane transport [GO:0006855]; polyamine homeostasis [GO:0010509]	integral component of membrane [GO:0016021]; plasma membrane [GO:0005886]	ascospore wall assembly [GO:0030476]; drug transmembrane transport [GO:0006855]; polyamine homeostasis [GO:0010509]	drug transmembrane transporter activity [GO:0015238]; polyamine transmembrane transporter activity [GO:0015203]
FMP23	0	95.72876474	#NAME?	2.04E-06	7.63E-05	P38231	FMP23_YEAST	Protein FMP23, mitochondrial	FMP23 YBR047W YBR0422	175	mitochondrion [GO:0005739]	mitochondrion [GO:0005739]
REG2	197.3612128	483.6307541	-1.293067502	3.46E-08	1.92E-06	P38232	REG2_YEAST	Protein REG2	REG2 YBR050C YBR0504	338	protein phosphatase type 1 complex [GO:0000164]; protein phosphatase regulator activity [GO:0019888]; negative regulation of transcription from RNA polymerase II promoter [GO:0000122]	protein phosphatase type 1 complex [GO:0000164]	negative regulation of transcription from RNA polymerase II promoter [GO:0000122]	protein phosphatase regulator activity [GO:0019888]
NHP6B	441.9528998	713.0258717	-0.690061799	0.003042682	0.040288255	P11633	NHP6B_YEAST	Non-histone chromosomal protein 6B	NHP6B NHPB YBR089C-A YBR090BC	99	chromosome [GO:0005694]; nucleus [GO:0005634]; DNA binding, bending [GO:0008301]; nucleosome binding [GO:0031491]; chromatin remodeling [GO:0006338]; DNA repair [GO:0006281]; maintenance of transcriptional fidelity during DNA-templated transcription elongation from RNA polymerase III promoter [GO:0001195]; regulation of transcription, DNA-templated [GO:0006355]; RNA polymerase III transcriptional…	chromosome [GO:0005694]; nucleus [GO:0005634]	chromatin remodeling [GO:0006338]; DNA repair [GO:0006281]; maintenance of transcriptional fidelity during DNA-templated transcription elongation from RNA polymerase III promoter [GO:0001195]; regulation of transcription, DNA-templated [GO:0006355]; RNA polymerase III transcriptional preinitiation complex assembly [GO:0070898]; transcription from RNA polymerase II promoter [GO:0006366]	DNA binding, bending [GO:0008301]; nucleosome binding [GO:0031491]
YBR090C	448.7267975	756.3539179	-0.753224124	0.000828809	0.014574313	P38253	YBU0_YEAST	Uncharacterized protein YBR090C	YBR090C YBR0811B	122	cytoplasm [GO:0005737]; integral component of membrane [GO:0016021]; nucleus [GO:0005634]	cytoplasm [GO:0005737]; integral component of membrane [GO:0016021]; nucleus [GO:0005634]
YBR116C	72.24649065	213.1762885	-1.561047561	7.60E-06	0.000242899	P38268	YBW6_YEAST	Putative uncharacterized protein YBR116C	YBR116C YBR0911	175	integral component of membrane [GO:0016021]	integral component of membrane [GO:0016021]
TKL2	83.75032625	228.0114213	-1.444939377	1.51E-05	0.000441381	P33315	TKT2_YEAST	Transketolase 2 (TK 2) (EC 2.2.1.1)	TKL2 YBR117C YBR0912	681	metal ion binding [GO:0046872]; transketolase activity [GO:0004802]; pentose-phosphate shunt [GO:0006098]		pentose-phosphate shunt [GO:0006098]	metal ion binding [GO:0046872]; transketolase activity [GO:0004802]
MEC1	32.02805083	95.92147539	-1.582517849	0.002003121	0.029920774	P38111	ATR_YEAST	Serine/threonine-protein kinase MEC1 (EC 2.7.11.1) (ATR homolog) (DNA-damage checkpoint kinase MEC1) (Mitosis entry checkpoint protein 1)	MEC1 ESR1 SAD3 YBR136W YBR1012	2368	nucleus [GO:0005634]; ATP binding [GO:0005524]; protein kinase activity [GO:0004672]; protein serine/threonine kinase activity [GO:0004674]; DNA damage induced protein phosphorylation [GO:0006975]; DNA recombination [GO:0006310]; DNA repair [GO:0006281]; DNA replication [GO:0006260]; histone phosphorylation [GO:0016572]; nucleobase-containing compound metabolic process [GO:0006139]; positive regu…	nucleus [GO:0005634]	DNA damage induced protein phosphorylation [GO:0006975]; DNA recombination [GO:0006310]; DNA repair [GO:0006281]; DNA replication [GO:0006260]; histone phosphorylation [GO:0016572]; nucleobase-containing compound metabolic process [GO:0006139]; positive regulation of DNA-dependent DNA replication [GO:2000105]; reciprocal meiotic recombination [GO:0007131]; telomere maintenance [GO:0000723]; telom…	ATP binding [GO:0005524]; protein kinase activity [GO:0004672]; protein serine/threonine kinase activity [GO:0004674]
MSI1	0	37.44128491	#NAME?	0.001901347	0.028658165	P13712	MSI1_YEAST	Chromatin assembly factor 1 subunit p50 (CAF-1 p50 subunit) (IRA1 multicopy suppressor) (Protein MSI1)	MSI1 CAC3 YBR195C YBR1405	422	CAF-1 complex [GO:0033186]; cytoplasm [GO:0005737]; nucleus [GO:0005634]; DNA replication-dependent nucleosome assembly [GO:0006335]	CAF-1 complex [GO:0033186]; cytoplasm [GO:0005737]; nucleus [GO:0005634]	DNA replication-dependent nucleosome assembly [GO:0006335]
BEM1	52.68025894	143.8328433	-1.449058802	0.000174987	0.003903156	P29366	BEM1_YEAST	Bud emergence protein 1 (Suppressor of RHO3 protein 1)	BEM1 SRO1 YBR200W YBR1412	551	cellular bud neck [GO:0005935]; cellular bud tip [GO:0005934]; cytoplasm [GO:0005737]; cytoskeleton [GO:0005856]; incipient cellular bud site [GO:0000131]; site of polarized growth [GO:0030427]; phosphatidylinositol-3-phosphate binding [GO:0032266]; protein complex scaffold [GO:0032947]; cell morphogenesis involved in conjugation with cellular fusion [GO:0000753]	cellular bud neck [GO:0005935]; cellular bud tip [GO:0005934]; cytoplasm [GO:0005737]; cytoskeleton [GO:0005856]; incipient cellular bud site [GO:0000131]; site of polarized growth [GO:0030427]	cell morphogenesis involved in conjugation with cellular fusion [GO:0000753]	phosphatidylinositol-3-phosphate binding [GO:0032266]; protein complex scaffold [GO:0032947]
DUR1,2	73.85095449	192.5438926	-1.38249889	8.96E-05	0.002166181	P38325	DUR1_YEAST	reviewed	Urea amidolyase [Includes: Urea carboxylase (EC 6.3.4.6); Allophanate hydrolase (EC 3.5.1.54)]	DUR1,2 YBR208C YBR1448	1835	allophanate hydrolase activity [GO:0004039]; ATP binding [GO:0005524]; biotin carboxylase activity [GO:0004075]; metal ion binding [GO:0046872]; urea carboxylase activity [GO:0004847]; allantoin catabolic process [GO:0000256]; arginine metabolic process [GO:0006525]; urea catabolic process [GO:0043419]		allantoin catabolic process [GO:0000256]; arginine metabolic process [GO:0006525]; urea catabolic process [GO:0043419]	allophanate hydrolase activity [GO:0004039]; ATP binding [GO:0005524]; biotin carboxylase activity [GO:0004075]; metal ion binding [GO:0046872]; urea carboxylase activity [GO:0004847]
OM14	1001.365307	2904.141149	-1.536143195	1.59E-18	4.07E-16	P37302	OM14_YEAST	Mitochondrial outer membrane protein OM14 (Outer membrane protein of 14 kDa)	OM14 YBR230C YBR1527	134	integral component of mitochondrial outer membrane [GO:0031307]; nascent polypeptide-associated complex binding [GO:1990593]; protein targeting to mitochondrion [GO:0006626]; ribosome localization [GO:0033750]	integral component of mitochondrial outer membrane [GO:0031307]	protein targeting to mitochondrion [GO:0006626]; ribosome localization [GO:0033750]	nascent polypeptide-associated complex binding [GO:1990593]
APE3	481.5881389	778.4473658	-0.692799635	0.001892551	0.028655546	P38361	APE3_YEAST	Aminopeptidase Y (EC 3.4.11.15)	APE3 YBR286W YBR2024	537	fungal-type vacuole [GO:0000324]; aminopeptidase activity [GO:0004177]; metal ion binding [GO:0046872]; metallopeptidase activity [GO:0008237]; protein catabolic process in the vacuole [GO:0007039]	fungal-type vacuole [GO:0000324]	protein catabolic process in the vacuole [GO:0007039]	aminopeptidase activity [GO:0004177]; metal ion binding [GO:0046872]; metallopeptidase activity [GO:0008237]
PHO89	234.53317	444.1110095	-0.921128358	0.000132107	0.003038453	P25344	PHO89_YEAST	Phosphate permease PHO89 (Na(+)/Pi cotransporter PHO89)	PHO89 ITN1 YBR296C YBR2113	574	integral component of plasma membrane [GO:0005887]; plasma membrane [GO:0005886]; identical protein binding [GO:0042802]; inorganic phosphate transmembrane transporter activity [GO:0005315]; sodium:inorganic phosphate symporter activity [GO:0015319]; phosphate ion transmembrane transport [GO:0035435]; phosphate ion transport [GO:0006817]; transmembrane transport [GO:0055085]	integral component of plasma membrane [GO:0005887]; plasma membrane [GO:0005886]	phosphate ion transmembrane transport [GO:0035435]; phosphate ion transport [GO:0006817]; transmembrane transport [GO:0055085]	identical protein binding [GO:0042802]; inorganic phosphate transmembrane transporter activity [GO:0005315]; sodium:inorganic phosphate symporter activity [GO:0015319]
STE50	38.52043527	110.5032381	-1.520392736	0.00103227	0.017305247	Q8J0M4	STE50_YEAST	Protein STE50	STE50 YCL032W YCL32W	346	cytoplasm [GO:0005737]; protein kinase regulator activity [GO:0019887]; SAM domain binding [GO:0032093]; cell cycle arrest [GO:0007050]; cellular response to heat [GO:0034605]; MAPK cascade involved in osmosensory signaling pathway [GO:0000161]; osmosensory signaling pathway via Sho1 osmosensor [GO:0007232]; pheromone-dependent signal transduction involved in conjugation with cellular fusion [GO:…	cytoplasm [GO:0005737]	cell cycle arrest [GO:0007050]; cellular response to heat [GO:0034605]; MAPK cascade involved in osmosensory signaling pathway [GO:0000161]; osmosensory signaling pathway via Sho1 osmosensor [GO:0007232]; pheromone-dependent signal transduction involved in conjugation with cellular fusion [GO:0000750]; signal transduction involved in filamentous growth [GO:0001402]	protein kinase regulator activity [GO:0019887]; SAM domain binding [GO:0032093]
YCL012C	154.9108405	305.8508979	-0.981390406	0.00070788	0.012614683	P08679	YCB2_YEAST	UPF0357 protein YCL012C	YCL012C YCL011C-A	134
CIT2	1568.188006	2815.774207	-0.844433121	8.73E-06	0.000276366	P25613	CISY2_YEAST	Citrate synthase, peroxisomal (EC 2.3.3.16)	CIT2 YCR005C YCR043 YCR5C	460	cytoplasm [GO:0005737]; peroxisome [GO:0005777]; citrate (Si)-synthase activity [GO:0004108]; citrate metabolic process [GO:0006101]; glutamate biosynthetic process [GO:0006537]; glyoxylate cycle [GO:0006097]; tricarboxylic acid cycle [GO:0006099]	cytoplasm [GO:0005737]; peroxisome [GO:0005777]	citrate metabolic process [GO:0006101]; glutamate biosynthetic process [GO:0006537]; glyoxylate cycle [GO:0006097]; tricarboxylic acid cycle [GO:0006099]	citrate (Si)-synthase activity [GO:0004108]
ADY2	924.0328363	3036.928154	-1.716596754	5.55E-23	3.07E-20	P25649	ADY2_YEAST	Accumulation of dyads protein 2 (Ammonia transport outward protein 1)	ADY2 ATO1 YCR010C YCR10C	283	integral component of membrane [GO:0016021]; plasma membrane [GO:0005886]; vacuolar membrane [GO:0005774]; acetate transmembrane transporter activity [GO:0015123]; ammonium transmembrane transporter activity [GO:0008519]; acetate transport [GO:0006846]; ammonium transport [GO:0015696]; meiotic cell cycle [GO:0051321]; nitrogen utilization [GO:0019740]; plasma membrane acetate transport [GO:000684…	integral component of membrane [GO:0016021]; plasma membrane [GO:0005886]; vacuolar membrane [GO:0005774]	acetate transport [GO:0006846]; ammonium transport [GO:0015696]; meiotic cell cycle [GO:0051321]; nitrogen utilization [GO:0019740]; plasma membrane acetate transport [GO:0006847]; transmembrane transport [GO:0055085]	acetate transmembrane transporter activity [GO:0015123]; ammonium transmembrane transporter activity [GO:0008519]
AHC2	153.3898303	399.9045162	-1.382452738	8.73E-08	4.39E-06	Q07653	AHC2_YEAST	ADA histone acetyltransferase complex component 2 (Putative transcriptional regulator AHC2)	AHC2 YCR082W YCR82W	128	Ada2/Gcn5/Ada3 transcription activator complex [GO:0005671]; cytoplasm [GO:0005737]; histone acetylation [GO:0016573]	Ada2/Gcn5/Ada3 transcription activator complex [GO:0005671]; cytoplasm [GO:0005737]	histone acetylation [GO:0016573]
HBT1	268.724249	584.6048021	-1.121335167	9.03E-07	3.73E-05	Q02774	HBT1_YEAST	Protein HBT1 (HUB1 target protein 1)	HBT1 Crem YDL223C	1046	cytoplasm [GO:0005737]; mating projection [GO:0005937]; cell morphogenesis involved in conjugation with cellular fusion [GO:0000753]; regulation of cell shape [GO:0008360]	cytoplasm [GO:0005737]; mating projection [GO:0005937]	cell morphogenesis involved in conjugation with cellular fusion [GO:0000753]; regulation of cell shape [GO:0008360]
SHR3	225.4738759	384.8935835	-0.771499332	0.002400243	0.033873498	Q12443	SHR3_YEAST	Secretory component protein SHR3	SHR3 YDL212W D1022	210	integral component of endoplasmic reticulum membrane [GO:0030176]; unfolded protein binding [GO:0051082]; amino acid transport [GO:0006865]; ER to Golgi vesicle-mediated transport [GO:0006888]; protein folding [GO:0006457]; protein transport [GO:0015031]	integral component of endoplasmic reticulum membrane [GO:0030176]	amino acid transport [GO:0006865]; ER to Golgi vesicle-mediated transport [GO:0006888]; protein folding [GO:0006457]; protein transport [GO:0015031]	unfolded protein binding [GO:0051082]
RTN2	160.268247	476.3028335	-1.57139051	3.75E-11	3.36E-09	P0CX28	RTN2_YEAST	Reticulon-like protein 2	RTN2 YDL204W D1062	393	cortical endoplasmic reticulum [GO:0032541]; endoplasmic reticulum membrane [GO:0005789]; endoplasmic reticulum tubular network [GO:0071782]; integral component of membrane [GO:0016021]; endoplasmic reticulum inheritance [GO:0048309]; endoplasmic reticulum tubular network maintenance [GO:0071788]; endoplasmic reticulum tubular network organization [GO:0071786]; ER-dependent peroxisome organizatio…	cortical endoplasmic reticulum [GO:0032541]; endoplasmic reticulum membrane [GO:0005789]; endoplasmic reticulum tubular network [GO:0071782]; integral component of membrane [GO:0016021]	endoplasmic reticulum inheritance [GO:0048309]; endoplasmic reticulum tubular network maintenance [GO:0071788]; endoplasmic reticulum tubular network organization [GO:0071786]; ER-dependent peroxisome organization [GO:0032581]; response to endoplasmic reticulum stress [GO:0034976]
RPL41B	3780.255666	8832.136377	-1.224278639	7.41E-19	2.06E-16	P0CX87	RL41B_YEAST	60S ribosomal protein L41-B (L47) (Large ribosomal subunit protein eL41-B) (YL41)	RPL41B RPL47B YL41B YDL133C-A YDL133BC	25	cytosolic large ribosomal subunit [GO:0022625]; structural constituent of ribosome [GO:0003735]; cytoplasmic translation [GO:0002181]	cytosolic large ribosomal subunit [GO:0022625]	cytoplasmic translation [GO:0002181]	structural constituent of ribosome [GO:0003735]
TMA17	414.6236346	722.0444394	-0.800285277	0.000480637	0.009206894	Q12513	TMA17_YEAST	Translation machinery-associated protein 17 (ATPase-dedicated chaperone of 17 kDa) (ADC17)	TMA17 YDL110C D2320	150	cytoplasm [GO:0005737]; nucleus [GO:0005634]; protein binding, bridging [GO:0030674]; proteasome regulatory particle assembly [GO:0070682]	cytoplasm [GO:0005737]; nucleus [GO:0005634]	proteasome regulatory particle assembly [GO:0070682]	protein binding, bridging [GO:0030674]
NDE2	215.4664141	572.3911628	-1.409538392	4.66E-10	3.40E-08	Q07500	NDH2_YEAST	External NADH-ubiquinone oxidoreductase 2, mitochondrial (EC 1.6.5.9) (External NADH dehydrogenase 2)	NDE2 NDH2 YDL085W	545	mitochondrial intermembrane space [GO:0005758]; mitochondrion [GO:0005739]; NADH dehydrogenase activity [GO:0003954]; glycolytic fermentation to ethanol [GO:0019655]; NADH oxidation [GO:0006116]	mitochondrial intermembrane space [GO:0005758]; mitochondrion [GO:0005739]	glycolytic fermentation to ethanol [GO:0019655]; NADH oxidation [GO:0006116]	NADH dehydrogenase activity [GO:0003954]
MDH3	691.7161582	1569.964924	-1.182480265	4.90E-14	6.15E-12	P32419	MDHP_YEAST	Malate dehydrogenase, peroxisomal (EC 1.1.1.37)	MDH3 YDL078C D2468	343	peroxisomal matrix [GO:0005782]; peroxisome [GO:0005777]; L-malate dehydrogenase activity [GO:0030060]; mRNA binding [GO:0003729]; fatty acid beta-oxidation [GO:0006635]; glyoxylate cycle [GO:0006097]; malate metabolic process [GO:0006108]; NADH regeneration [GO:0006735]; tricarboxylic acid cycle [GO:0006099]	peroxisomal matrix [GO:0005782]; peroxisome [GO:0005777]	fatty acid beta-oxidation [GO:0006635]; glyoxylate cycle [GO:0006097]; malate metabolic process [GO:0006108]; NADH regeneration [GO:0006735]; tricarboxylic acid cycle [GO:0006099]	L-malate dehydrogenase activity [GO:0030060]; mRNA binding [GO:0003729]
GPD1	232.5192	466.2077349	-1.00362309	2.39E-05	0.0006743	P00360	G3P1_YEAST	Glyceraldehyde-3-phosphate dehydrogenase 1 (GAPDH 1) (EC 1.2.1.12)	GPD1 DAR1 HOR1 OSG1 YDL022W D2830	391	cytosol [GO:0005829]; glycerol-3-phosphate dehydrogenase complex [GO:0009331]; nucleus [GO:0005634]; peroxisome [GO:0005777]; glycerol-3-phosphate dehydrogenase [NAD+] activity [GO:0004367]; NAD binding [GO:0051287]; protein homodimerization activity [GO:0042803]; carbohydrate metabolic process [GO:0005975]; glycerol-3-phosphate catabolic process [GO:0046168]; intracellular accumulation of glycer…	cytosol [GO:0005829]; glycerol-3-phosphate dehydrogenase complex [GO:0009331]; nucleus [GO:0005634]; peroxisome [GO:0005777]	carbohydrate metabolic process [GO:0005975]; glycerol-3-phosphate catabolic process [GO:0046168]; intracellular accumulation of glycerol [GO:0006973]; NADH oxidation [GO:0006116]; protein import into peroxisome matrix [GO:0016558]	glycerol-3-phosphate dehydrogenase [NAD+] activity [GO:0004367]; NAD binding [GO:0051287]; protein homodimerization activity [GO:0042803]
YDR034W-B	130.7726537	420.87203	-1.68632075	6.31E-11	5.52E-09	Q00055	GPD1_YEAST	Glycerol-3-phosphate dehydrogenase [NAD(+)] 1 (EC 1.1.1.8)	YDR034W-B	51	cell cortex [GO:0005938]; integral component of membrane [GO:0016021]	cell cortex [GO:0005938]; integral component of membrane [GO:0016021]
ENA2	126.2886146	400.0745666	-1.663544336	2.33E-10	1.82E-08	Q6Q5X2	YD34B_YEAST	Cysteine-rich and transmembrane domain-containing protein YDR034W-B	ENA2 PMR2B YDR039C	1091	integral component of membrane [GO:0016021]; plasma membrane [GO:0005886]; ATP binding [GO:0005524]; ATPase activity, coupled to transmembrane movement of ions, phosphorylative mechanism [GO:0015662]; potassium-transporting ATPase activity [GO:0008556]; sodium-exporting ATPase activity, phosphorylative mechanism [GO:0008554]; potassium ion transport [GO:0006813]; sodium ion transport [GO:0006814]…	integral component of membrane [GO:0016021]; plasma membrane [GO:0005886]	potassium ion transport [GO:0006813]; sodium ion transport [GO:0006814]; transmembrane transport [GO:0055085]	ATPase activity, coupled to transmembrane movement of ions, phosphorylative mechanism [GO:0015662]; ATP binding [GO:0005524]; potassium-transporting ATPase activity [GO:0008556]; sodium-exporting ATPase activity, phosphorylative mechanism [GO:0008554]
ENA1	134.5089935	381.3222511	-1.503308081	1.41E-08	8.51E-07	Q01896	ATN2_YEAST	Sodium transport ATPase 2 (EC 3.6.3.7)	ENA1 HOR6 PMR2 PMR2A YDR040C YD6888.02C	1091	integral component of membrane [GO:0016021]; plasma membrane [GO:0005886]; ATP binding [GO:0005524]; potassium-transporting ATPase activity [GO:0008556]; sodium-exporting ATPase activity, phosphorylative mechanism [GO:0008554]; cellular response to glucose starvation [GO:0042149]; hyperosmotic response [GO:0006972]; potassium ion transport [GO:0006813]; response to pH [GO:0009268]; response to sa…	integral component of membrane [GO:0016021]; plasma membrane [GO:0005886]	cellular response to glucose starvation [GO:0042149]; hyperosmotic response [GO:0006972]; potassium ion transport [GO:0006813]; response to pH [GO:0009268]; response to salt stress [GO:0009651]; sodium ion transport [GO:0006814]; transmembrane transport [GO:0055085]	ATP binding [GO:0005524]; potassium-transporting ATPase activity [GO:0008556]; sodium-exporting ATPase activity, phosphorylative mechanism [GO:0008554]
UBC5	528.0720761	907.1322424	-0.780578028	0.000119325	0.00281259	P13587	ATN1_YEAST	Sodium transport ATPase 1 (EC 3.6.3.7)	UBC5 YDR059C D4234 YD9609.13C	148	proteasome complex [GO:0000502]; ATP binding [GO:0005524]; ubiquitin-protein transferase activity [GO:0004842]; cellular response to heat [GO:0034605]; protein polyubiquitination [GO:0000209]	proteasome complex [GO:0000502]	cellular response to heat [GO:0034605]; protein polyubiquitination [GO:0000209]	ATP binding [GO:0005524]; ubiquitin-protein transferase activity [GO:0004842]
FMP16	858.9129858	2721.014664	-1.663560843	5.70E-22	2.71E-19	P15732	UBC5_YEAST	Ubiquitin-conjugating enzyme E2-16 kDa (EC 2.3.2.23) (E2 ubiquitin-conjugating enzyme 5) (Ubiquitin carrier protein) (Ubiquitin-protein ligase)	FMP16 YDR070C	93	mitochondrion [GO:0005739]	mitochondrion [GO:0005739]
COX26	218.175866	531.1266664	-1.283564441	2.06E-08	1.22E-06	Q12497	FMP16_YEAST	Protein FMP16, mitochondrial (Found in mitochondrial proteome protein 16)	NUM1 PAC12 YDR150W YD8358.06	2748	cell cortex [GO:0005938]; cellular bud tip [GO:0005934]; endoplasmic reticulum [GO:0005783]; phospholipid binding [GO:0005543]; tubulin binding [GO:0015631]; cortical protein anchoring [GO:0032065]; dynein-driven meiotic oscillatory nuclear movement [GO:0030989]; microtubule cytoskeleton organization [GO:0000226]; mitochondrial fission [GO:0000266]; mitochondrion inheritance [GO:0000001]; mitocho…	cell cortex [GO:0005938]; cellular bud tip [GO:0005934]; endoplasmic reticulum [GO:0005783]	cortical protein anchoring [GO:0032065]; dynein-driven meiotic oscillatory nuclear movement [GO:0030989]; microtubule cytoskeleton organization [GO:0000226]; mitochondrial fission [GO:0000266]; mitochondrion inheritance [GO:0000001]; mitochondrion localization [GO:0051646]; nuclear migration along microtubule [GO:0030473]	phospholipid binding [GO:0005543]; tubulin binding [GO:0015631]
NUM1	196.3287003	344.5013558	-0.811238572	0.002657027	0.036396307	Q00402	NUM1_YEAST	Nuclear migration protein NUM1	ENT5 YDR153C	411	clathrin vesicle coat [GO:0030125]; cytosol [GO:0005829]; endosome [GO:0005768]; endosome membrane [GO:0010008]; clathrin binding [GO:0030276]; phosphatidylinositol-3,5-bisphosphate binding [GO:0080025]; early endosome to Golgi transport [GO:0034498]; Golgi to endosome transport [GO:0006895]; late endosome to vacuole transport via multivesicular body sorting pathway [GO:0032511]; protein transpor…	clathrin vesicle coat [GO:0030125]; cytosol [GO:0005829]; endosome [GO:0005768]; endosome membrane [GO:0010008]	early endosome to Golgi transport [GO:0034498]; Golgi to endosome transport [GO:0006895]; late endosome to vacuole transport via multivesicular body sorting pathway [GO:0032511]; protein transport [GO:0015031]	clathrin binding [GO:0030276]; phosphatidylinositol-3,5-bisphosphate binding [GO:0080025]
ENT5	80.83183652	174.2055417	-1.107794987	0.002521964	0.035217419	Q03769	ENT5_YEAST	Epsin-5	YDR154C	116
YDR154C	4284.574425	6303.835199	-0.557077906	0.00068607	0.012325158	A0A023PZA4	YD154_YEAST	Putative uncharacterized protein YDR154C	CPR1 CPH1 CYP1 SCC1 YDR155C YD8358.10C	162	histone deacetylase complex [GO:0000118]; mitochondrial intermembrane space [GO:0005758]; nucleus [GO:0005634]; Set3 complex [GO:0034967]; cyclosporin A binding [GO:0016018]; peptidyl-prolyl cis-trans isomerase activity [GO:0003755]; ascospore formation [GO:0030437]; cellular protein metabolic process [GO:0044267]; histone deacetylation [GO:0016575]; positive regulation of meiotic nuclear divisio…	histone deacetylase complex [GO:0000118]; mitochondrial intermembrane space [GO:0005758]; nucleus [GO:0005634]; Set3 complex [GO:0034967]	ascospore formation [GO:0030437]; cellular protein metabolic process [GO:0044267]; histone deacetylation [GO:0016575]; positive regulation of meiotic nuclear division [GO:0045836]; protein folding [GO:0006457]; protein transport [GO:0015031]	cyclosporin A binding [GO:0016018]; peptidyl-prolyl cis-trans isomerase activity [GO:0003755]
CPR1	4395.213358	6516.626066	-0.568192013	0.000456736	0.008903005	P14832	CYPH_YEAST	Peptidyl-prolyl cis-trans isomerase (PPIase) (EC 5.2.1.8) (Cyclophilin) (CPH) (Cyclosporin A-binding protein) (PPI-II) (Rotamase)	NCP1 CPR1 NCPR1 PRD1 YHR042W	691	endoplasmic reticulum membrane [GO:0005789]; integral component of membrane [GO:0016021]; mitochondrial outer membrane [GO:0005741]; plasma membrane [GO:0005886]; electron carrier activity [GO:0009055]; FMN binding [GO:0010181]; NADPH-hemoprotein reductase activity [GO:0003958]; ergosterol biosynthetic process [GO:0006696]	endoplasmic reticulum membrane [GO:0005789]; integral component of membrane [GO:0016021]; mitochondrial outer membrane [GO:0005741]; plasma membrane [GO:0005886]	ergosterol biosynthetic process [GO:0006696]	electron carrier activity [GO:0009055]; FMN binding [GO:0010181]; NADPH-hemoprotein reductase activity [GO:0003958]
CTA1	111.4134063	303.3989449	-1.445293227	6.07E-07	2.57E-05	P16603	NCPR_YEAST	NADPH--cytochrome P450 reductase (CPR) (P450R) (EC 1.6.2.4)	CTA1 YDR256C YD9320A.06C	515	mitochondrial matrix [GO:0005759]; peroxisomal matrix [GO:0005782]; catalase activity [GO:0004096]; heme binding [GO:0020037]; metal ion binding [GO:0046872]; age-dependent response to reactive oxygen species [GO:0001315]; hydrogen peroxide catabolic process [GO:0042744]; response to hydrogen peroxide [GO:0042542]; response to reactive oxygen species [GO:0000302]	mitochondrial matrix [GO:0005759]; peroxisomal matrix [GO:0005782]	age-dependent response to reactive oxygen species [GO:0001315]; hydrogen peroxide catabolic process [GO:0042744]; response to hydrogen peroxide [GO:0042542]; response to reactive oxygen species [GO:0000302]	catalase activity [GO:0004096]; heme binding [GO:0020037]; metal ion binding [GO:0046872]
PMP3	468.5499062	817.6120188	-0.803213683	0.000204586	0.0044733	P15202	CATA_YEAST	Peroxisomal catalase A (EC 1.11.1.6)	PMP3 SNA1 YDR276C	55	integral component of membrane [GO:0016021]; plasma membrane [GO:0005886]; phosphatidic acid binding [GO:0070300]; phosphatidylinositol-3,5-bisphosphate binding [GO:0080025]; phosphatidylinositol-3-phosphate binding [GO:0032266]; sphingolipid binding [GO:0046625]; cation transport [GO:0006812]; cellular response to drug [GO:0035690]; regulation of membrane potential [GO:0042391]	integral component of membrane [GO:0016021]; plasma membrane [GO:0005886]	cation transport [GO:0006812]; cellular response to drug [GO:0035690]; regulation of membrane potential [GO:0042391]	phosphatidic acid binding [GO:0070300]; phosphatidylinositol-3,5-bisphosphate binding [GO:0080025]; phosphatidylinositol-3-phosphate binding [GO:0032266]; sphingolipid binding [GO:0046625]
YDR379C-A	149.7758588	288.0207782	-0.943367788	0.001572691	0.024771745	P87284	PMP3_YEAST	Plasma membrane proteolipid 3	SDH6 YDR379C-A smORF139 smORF8	79	mitochondrial matrix [GO:0005759]; iron-sulfur cluster assembly [GO:0016226]; mitochondrial respiratory chain complex II assembly [GO:0034553]	mitochondrial matrix [GO:0005759]	iron-sulfur cluster assembly [GO:0016226]; mitochondrial respiratory chain complex II assembly [GO:0034553]
ARO10	20.00572778	74.01775609	-1.887458287	0.000899283	0.015566488	Q3E785	SDHF1_YEAST	Succinate dehydrogenase assembly factor 1, mitochondrial (SDH assembly factor 1) (SDHAF1)	ARO10 YDR380W D9481.3	635	cytoplasm [GO:0005737]; branched-chain-2-oxoacid decarboxylase activity [GO:0047433]; carboxy-lyase activity [GO:0016831]; magnesium ion binding [GO:0000287]; phenylpyruvate decarboxylase activity [GO:0050177]; pyruvate decarboxylase activity [GO:0004737]; thiamine pyrophosphate binding [GO:0030976]; aromatic amino acid family catabolic process to alcohol via Ehrlich pathway [GO:0000949]; branche…	cytoplasm [GO:0005737]	aromatic amino acid family catabolic process to alcohol via Ehrlich pathway [GO:0000949]; branched-chain amino acid catabolic process to alcohol via Ehrlich pathway [GO:0000950]; ethanol metabolic process [GO:0006067]; leucine catabolic process [GO:0006552]; L-phenylalanine catabolic process [GO:0006559]; methionine catabolic process to 3-methylthiopropanol [GO:0000951]; pyruvate metabolic proces…	branched-chain-2-oxoacid decarboxylase activity [GO:0047433]; carboxy-lyase activity [GO:0016831]; magnesium ion binding [GO:0000287]; phenylpyruvate decarboxylase activity [GO:0050177]; pyruvate decarboxylase activity [GO:0004737]; thiamine pyrophosphate binding [GO:0030976]
ATO3	145.9338377	481.9650634	-1.723614132	6.17E-13	6.95E-11	Q06408	ARO10_YEAST	Transaminated amino acid decarboxylase (EC 4.1.1.43) (Transaminated branched-chain amino acid decarboxylase)	ATO3 YDR384C D9481.20 D9509.4	275	integral component of membrane [GO:0016021]; plasma membrane [GO:0005886]; acetate transmembrane transporter activity [GO:0015123]; ammonium transmembrane transporter activity [GO:0008519]; ammonium transport [GO:0015696]; nitrogen utilization [GO:0019740]; plasma membrane acetate transport [GO:0006847]; transmembrane transport [GO:0055085]	integral component of membrane [GO:0016021]; plasma membrane [GO:0005886]	ammonium transport [GO:0015696]; nitrogen utilization [GO:0019740]; plasma membrane acetate transport [GO:0006847]; transmembrane transport [GO:0055085]	acetate transmembrane transporter activity [GO:0015123]; ammonium transmembrane transporter activity [GO:0008519]
NHX1	95.50568531	204.9954822	-1.101933593	0.001210584	0.019917703	Q12359	ATO3_YEAST	Ammonia transport outward protein 3	NHX1 NHA2 VPL27 VPS44 YDR456W D9461.40	633	early endosome [GO:0005769]; fungal-type vacuole membrane [GO:0000329]; integral component of membrane [GO:0016021]; late endosome [GO:0005770]; late endosome membrane [GO:0031902]; trans-Golgi network [GO:0005802]; potassium:proton antiporter activity [GO:0015386]; sodium:proton antiporter activity [GO:0015385]; cellular monovalent inorganic cation homeostasis [GO:0030004]; potassium ion transme…	early endosome [GO:0005769]; fungal-type vacuole membrane [GO:0000329]; integral component of membrane [GO:0016021]; late endosome [GO:0005770]; late endosome membrane [GO:0031902]; trans-Golgi network [GO:0005802]	cellular monovalent inorganic cation homeostasis [GO:0030004]; potassium ion transmembrane transport [GO:0071805]; sodium ion transmembrane transport [GO:0035725]; vacuolar acidification [GO:0007035]	potassium:proton antiporter activity [GO:0015386]; sodium:proton antiporter activity [GO:0015385]
EMI1	83.54780431	181.4335272	-1.118767258	0.001657533	0.025802386	Q04121	NHX1_YEAST	Endosomal/prevacuolar sodium/hydrogen exchanger (Endosomal/prevacuolar Na(+)/H(+) exchanger) (Vacuolar protein sorting-associated protein 44)	EMI1 YDR512C D9719.18	187	meiotic cell cycle [GO:0051321]; mitochondrion organization [GO:0007005]; sporulation resulting in formation of a cellular spore [GO:0030435]		meiotic cell cycle [GO:0051321]; mitochondrion organization [GO:0007005]; sporulation resulting in formation of a cellular spore [GO:0030435]
SPS1	0	23.08256255	#NAME?	0.000138873	0.003172127	Q04406	EMI1_YEAST	Early meiotic induction protein 1	SPS1 YDR523C D9719.27	490	cytoplasm [GO:0005737]; nucleus [GO:0005634]; prospore membrane [GO:0005628]; ATP binding [GO:0005524]; MAP kinase kinase kinase kinase activity [GO:0008349]; protein kinase activity [GO:0004672]; activation of protein kinase activity [GO:0032147]; ascospore formation [GO:0030437]; ascospore wall assembly [GO:0030476]; ascospore-type prospore membrane assembly [GO:0032120]; protein phosphorylatio…	cytoplasm [GO:0005737]; nucleus [GO:0005634]; prospore membrane [GO:0005628]	activation of protein kinase activity [GO:0032147]; ascospore formation [GO:0030437]; ascospore-type prospore membrane assembly [GO:0032120]; ascospore wall assembly [GO:0030476]; protein phosphorylation [GO:0006468]; regulation of apoptotic process [GO:0042981]; regulation of mitotic cell cycle [GO:0007346]; signal transduction by protein phosphorylation [GO:0023014]; stress-activated protein ki…	ATP binding [GO:0005524]; MAP kinase kinase kinase kinase activity [GO:0008349]; protein kinase activity [GO:0004672]
SNA2	187.7778066	414.8535129	-1.143575441	3.67E-06	0.000129612	P08458	SPS1_YEAST	Sporulation-specific protein 1 (EC 2.7.11.1)	SNA2 YDR525W-A YDR525BW	79	fungal-type vacuole lumen [GO:0000328]; fungal-type vacuole membrane [GO:0000329]; integral component of membrane [GO:0016021]; lipid particle [GO:0005811]; ubiquitin protein ligase binding [GO:0031625]; cellular protein catabolic process [GO:0044257]; endosome transport via multivesicular body sorting pathway [GO:0032509]	fungal-type vacuole lumen [GO:0000328]; fungal-type vacuole membrane [GO:0000329]; integral component of membrane [GO:0016021]; lipid particle [GO:0005811]	cellular protein catabolic process [GO:0044257]; endosome transport via multivesicular body sorting pathway [GO:0032509]	ubiquitin protein ligase binding [GO:0031625]
YDR526C	64.67259212	144.858547	-1.163418469	0.002876747	0.038626062	P56508	SNA2_YEAST	Protein SNA2	YDR526C	156	integral component of membrane [GO:0016021]	integral component of membrane [GO:0016021]
TEL04R-YP	29.10509877	84.14347989	-1.531579571	0.003557808	0.045737616	P87274	YD526_YEAST	Putative uncharacterized protein YDR526C	YRF1-1 YDR545W D3703.4	1796	nucleus [GO:0005634]; ATP binding [GO:0005524]; DNA helicase activity [GO:0003678]; nucleic acid binding [GO:0003676]; telomere maintenance via recombination [GO:0000722]	nucleus [GO:0005634]	telomere maintenance via recombination [GO:0000722]	ATP binding [GO:0005524]; DNA helicase activity [GO:0003678]; nucleic acid binding [GO:0003676]
YRF1,1	95.3631431	196.8102029	-1.045301322	0.002561057	0.035468324	P0CX20	YRF11_YEAST	Y' element ATP-dependent helicase protein 1 copy 1 (EC 3.6.4.12)	YEL077C	1277	ATP binding [GO:0005524]; helicase activity [GO:0004386]			ATP binding [GO:0005524]; helicase activity [GO:0004386]
SIT1	271.4491415	915.9563131	-1.754596869	1.66E-16	3.14E-14	Q3E7X8	YE077_YEAST	Y' element ATP-dependent helicase YEL077C (EC 3.6.4.12)	SIT1 ARN3 YEL065W	628	cytoplasmic vesicle [GO:0031410]; endosome [GO:0005768]; endosome membrane [GO:0010008]; integral component of plasma membrane [GO:0005887]; siderophore uptake transmembrane transporter activity [GO:0015344]; cellular iron ion homeostasis [GO:0006879]; iron assimilation by chelation and transport [GO:0033214]; siderophore transport [GO:0015891]; transmembrane transport [GO:0055085]	cytoplasmic vesicle [GO:0031410]; endosome [GO:0005768]; endosome membrane [GO:0010008]; integral component of plasma membrane [GO:0005887]	cellular iron ion homeostasis [GO:0006879]; iron assimilation by chelation and transport [GO:0033214]; siderophore transport [GO:0015891]; transmembrane transport [GO:0055085]	siderophore uptake transmembrane transporter activity [GO:0015344]
AVT2	0	74.68836818	#NAME?	0.000256865	0.00537449	P39980	SIT1_YEAST	Siderophore iron transporter 1 (Ferrioxamine B permease) (Siderophore iron transporter ARN3)	AVT2 YEL064C	480	endoplasmic reticulum [GO:0005783]; integral component of membrane [GO:0016021]; vacuolar membrane [GO:0005774]; amino acid transmembrane transporter activity [GO:0015171]; amino acid transmembrane transport [GO:0003333]	endoplasmic reticulum [GO:0005783]; integral component of membrane [GO:0016021]; vacuolar membrane [GO:0005774]	amino acid transmembrane transport [GO:0003333]	amino acid transmembrane transporter activity [GO:0015171]
CAN1	168.651071	354.3008267	-1.070933352	5.76E-05	0.001455551	P39981	AVT2_YEAST	Vacuolar amino acid transporter 2	CAN1 YEL063C	590	endosome membrane [GO:0010008]; integral component of membrane [GO:0016021]; membrane raft [GO:0045121]; plasma membrane [GO:0005886]; arginine transmembrane transporter activity [GO:0015181]; basic amino acid transmembrane transporter activity [GO:0015174]; arginine transport [GO:0015809]; basic amino acid transport [GO:0015802]; transmembrane transport [GO:0055085]	endosome membrane [GO:0010008]; integral component of membrane [GO:0016021]; membrane raft [GO:0045121]; plasma membrane [GO:0005886]	arginine transport [GO:0015809]; basic amino acid transport [GO:0015802]; transmembrane transport [GO:0055085]	arginine transmembrane transporter activity [GO:0015181]; basic amino acid transmembrane transporter activity [GO:0015174]
NPR2	0	26.16853857	#NAME?	0.003748292	0.047566488	P04817	CAN1_YEAST	Arginine permease CAN1 (Canavanine resistance protein 1)	NPR2 YEL062W	615	extrinsic component of fungal-type vacuolar membrane [GO:0097042]; GATOR1 complex [GO:1990130]; Seh1-associated complex [GO:0035859]; cellular response to nitrogen starvation [GO:0006995]; negative regulation of TOR signaling [GO:0032007]; positive regulation of autophagy [GO:0010508]; positive regulation of cellular response to amino acid starvation [GO:1903833]; proline transport [GO:0015824]; …	extrinsic component of fungal-type vacuolar membrane [GO:0097042]; GATOR1 complex [GO:1990130]; Seh1-associated complex [GO:0035859]	cellular response to nitrogen starvation [GO:0006995]; negative regulation of TOR signaling [GO:0032007]; positive regulation of autophagy [GO:0010508]; positive regulation of cellular response to amino acid starvation [GO:1903833]; proline transport [GO:0015824]; protein transport [GO:0015031]; regulation of autophagosome assembly [GO:2000785]; regulation of transcription, DNA-templated [GO:0006…
PCM1	136.4650374	274.0474772	-1.005894477	0.000660219	0.011957707	P39923	NPR2_YEAST	Nitrogen permease regulator 2	PCM1 AGM1 YEL058W	557	cytosol [GO:0005829]; nucleus [GO:0005634]; magnesium ion binding [GO:0000287]; phosphoacetylglucosamine mutase activity [GO:0004610]; cell wall organization [GO:0071555]; fungal-type cell wall chitin biosynthetic process [GO:0034221]; UDP-N-acetylglucosamine biosynthetic process [GO:0006048]	cytosol [GO:0005829]; nucleus [GO:0005634]	cell wall organization [GO:0071555]; fungal-type cell wall chitin biosynthetic process [GO:0034221]; UDP-N-acetylglucosamine biosynthetic process [GO:0006048]	magnesium ion binding [GO:0000287]; phosphoacetylglucosamine mutase activity [GO:0004610]
HYP2	996.2513906	1519.203354	-0.608733258	0.000652629	0.011852529	P38628	AGM1_YEAST	Phosphoacetylglucosamine mutase (PAGM) (EC 5.4.2.3) (Acetylglucosamine phosphomutase) (N-acetylglucosamine-phosphate mutase) (PGM-complementing protein 1)	HYP2 TIF51A YEL034W SYGP-ORF21	157	cytosolic ribosome [GO:0022626]; ribosome binding [GO:0043022]; RNA binding [GO:0003723]; translation elongation factor activity [GO:0003746]; translation initiation factor activity [GO:0003743]; positive regulation of cytoplasmic translational elongation through polyproline stretches [GO:1903272]; positive regulation of translational elongation [GO:0045901]; positive regulation of translational …	cytosolic ribosome [GO:0022626]	positive regulation of cytoplasmic translational elongation through polyproline stretches [GO:1903272]; positive regulation of translational elongation [GO:0045901]; positive regulation of translational initiation [GO:0045948]; positive regulation of translational termination [GO:0045905]; translational frameshifting [GO:0006452]	ribosome binding [GO:0043022]; RNA binding [GO:0003723]; translation elongation factor activity [GO:0003746]; translation initiation factor activity [GO:0003743]
YEL020C	88.40573504	216.6762291	-1.293329021	0.000122547	0.002878337	P23301	IF5A1_YEAST	Eukaryotic translation initiation factor 5A-1 (eIF-5A-1) (Hypusine-containing protein HP2) (eIF-4D)	YEL020C	560	cytosol [GO:0005829]; peroxisome [GO:0005777]; carboxy-lyase activity [GO:0016831]; magnesium ion binding [GO:0000287]; thiamine pyrophosphate binding [GO:0030976]	cytosol [GO:0005829]; peroxisome [GO:0005777]		carboxy-lyase activity [GO:0016831]; magnesium ion binding [GO:0000287]; thiamine pyrophosphate binding [GO:0030976]
FAA2	111.1318929	306.2910147	-1.46263014	4.41E-07	1.93E-05	P39994	YEC0_YEAST	Putative 2-hydroxyacyl-CoA lyase (EC 4.1.-.-)	FAA2 FAM1 YER015W	744	mitochondrion [GO:0005739]; peroxisome [GO:0005777]; ATP binding [GO:0005524]; decanoate--CoA ligase activity [GO:0102391]; long-chain fatty acid-CoA ligase activity [GO:0004467]; medium-chain fatty acid-CoA ligase activity [GO:0031956]; very long-chain fatty acid-CoA ligase activity [GO:0031957]; fatty acid beta-oxidation [GO:0006635]; fatty-acyl-CoA transport [GO:0015916]; long-chain fatty acid…	mitochondrion [GO:0005739]; peroxisome [GO:0005777]	fatty acid beta-oxidation [GO:0006635]; fatty-acyl-CoA transport [GO:0015916]; long-chain fatty acid metabolic process [GO:0001676]; peroxisomal long-chain fatty acid import [GO:0015910]; very long-chain fatty acid catabolic process [GO:0042760]	ATP binding [GO:0005524]; decanoate--CoA ligase activity [GO:0102391]; long-chain fatty acid-CoA ligase activity [GO:0004467]; medium-chain fatty acid-CoA ligase activity [GO:0031956]; very long-chain fatty acid-CoA ligase activity [GO:0031957]
YAT2	336.6702109	840.9827542	-1.320740141	9.56E-10	6.69E-08	P39518	LCF2_YEAST	Long-chain-fatty-acid--CoA ligase 2 (EC 6.2.1.3) (Fatty acid activator 2) (Long-chain acyl-CoA synthetase 2)	YAT2 YER024W	923	cytosol [GO:0005829]; carnitine O-acetyltransferase activity [GO:0004092]; alcohol metabolic process [GO:0006066]; carnitine metabolic process [GO:0009437]; fatty acid metabolic process [GO:0006631]; transport [GO:0006810]	cytosol [GO:0005829]	alcohol metabolic process [GO:0006066]; carnitine metabolic process [GO:0009437]; fatty acid metabolic process [GO:0006631]; transport [GO:0006810]	carnitine O-acetyltransferase activity [GO:0004092]
ICL1	1263.064135	4428.89667	-1.810019441	4.47E-29	5.94E-26	P40017	YAT2_YEAST	Carnitine O-acetyltransferase YAT2 (EC 2.3.1.7)	ICL1 YER065C	557	cytoplasm [GO:0005737]; glyoxysome [GO:0009514]; proteinaceous extracellular matrix [GO:0005578]; vacuole [GO:0005773]; isocitrate lyase activity [GO:0004451]; metal ion binding [GO:0046872]; methylisocitrate lyase activity [GO:0046421]; glyoxylate cycle [GO:0006097]; tricarboxylic acid cycle [GO:0006099]	cytoplasm [GO:0005737]; glyoxysome [GO:0009514]; proteinaceous extracellular matrix [GO:0005578]; vacuole [GO:0005773]	glyoxylate cycle [GO:0006097]; tricarboxylic acid cycle [GO:0006099]	isocitrate lyase activity [GO:0004451]; metal ion binding [GO:0046872]; methylisocitrate lyase activity [GO:0046421]
PTP3	41.53692803	124.5113419	-1.583810738	0.000208562	0.004545276	P28240	ACEA_YEAST	Isocitrate lyase (ICL) (EC 4.1.3.1) (Methylisocitrate lyase) (MICA) (EC 4.1.3.30) (Threo-D(S)-isocitrate glyoxylate-lyase)	PTP3 YER075C	928	cytoplasm [GO:0005737]; nucleus [GO:0005634]; protein tyrosine phosphatase activity [GO:0004725]; inactivation of MAPK activity involved in conjugation with cellular fusion [GO:0071511]; inactivation of MAPK activity involved in osmosensory signaling pathway [GO:0000173]; protein dephosphorylation [GO:0006470]; regulation of protein localization [GO:0032880]; regulation of sporulation [GO:0043937]	cytoplasm [GO:0005737]; nucleus [GO:0005634]	inactivation of MAPK activity involved in conjugation with cellular fusion [GO:0071511]; inactivation of MAPK activity involved in osmosensory signaling pathway [GO:0000173]; protein dephosphorylation [GO:0006470]; regulation of protein localization [GO:0032880]; regulation of sporulation [GO:0043937]	protein tyrosine phosphatase activity [GO:0004725]
YER121W	41.85289353	139.9837751	-1.741860347	3.07E-05	0.000842495	P40048	PTP3_YEAST	Tyrosine-protein phosphatase 3 (EC 3.1.3.48) (Protein-tyrosine phosphatase 3) (PTPase 3)	YER121W	114
FTR1	269.3861699	622.1944582	-1.207689759	9.21E-08	4.60E-06	P40076	YEV1_YEAST	Uncharacterized protein YER121W	FTR1 YER145C	404	high-affinity iron permease complex [GO:0033573]; plasma membrane [GO:0005886]; ferrous iron uptake transmembrane transporter activity [GO:0015639]; iron ion transmembrane transporter activity [GO:0005381]; arsenate ion transmembrane transport [GO:1901684]; high-affinity iron ion transmembrane transport [GO:0006827]; iron assimilation by reduction and transport [GO:0033215]	high-affinity iron permease complex [GO:0033573]; plasma membrane [GO:0005886]	arsenate ion transmembrane transport [GO:1901684]; high-affinity iron ion transmembrane transport [GO:0006827]; iron assimilation by reduction and transport [GO:0033215]	ferrous iron uptake transmembrane transporter activity [GO:0015639]; iron ion transmembrane transporter activity [GO:0005381]
LSM5	49.39680219	150.359887	-1.605930182	3.26E-05	0.000883458	P40088	FTR1_YEAST	Plasma membrane iron permease	LSM5 YER146W	93	Lsm1-7-Pat1 complex [GO:1990726]; nucleolus [GO:0005730]; small nucleolar ribonucleoprotein complex [GO:0005732]; spliceosomal complex [GO:0005681]; U4/U6 x U5 tri-snRNP complex [GO:0046540]; U6 snRNP [GO:0005688]; RNA binding [GO:0003723]; mRNA splicing, via spliceosome [GO:0000398]; nuclear-transcribed mRNA catabolic process [GO:0000956]; response to abscisic acid [GO:0009737]; response to wate…	Lsm1-7-Pat1 complex [GO:1990726]; nucleolus [GO:0005730]; small nucleolar ribonucleoprotein complex [GO:0005732]; spliceosomal complex [GO:0005681]; U4/U6 x U5 tri-snRNP complex [GO:0046540]; U6 snRNP [GO:0005688]	mRNA splicing, via spliceosome [GO:0000398]; nuclear-transcribed mRNA catabolic process [GO:0000956]; response to abscisic acid [GO:0009737]; response to water deprivation [GO:0009414]; rRNA processing [GO:0006364]; tRNA processing [GO:0008033]	RNA binding [GO:0003723]
BMH1	920.1396761	1326.228881	-0.527404996	0.003148908	0.041283608	P40089	LSM5_YEAST	U6 snRNA-associated Sm-like protein LSm5	BMH1 YER177W	267	cytoplasm [GO:0005737]; cytoplasmic stress granule [GO:0010494]; nucleus [GO:0005634]; DNA replication origin binding [GO:0003688]; phosphoserine binding [GO:0050815]; protein domain specific binding [GO:0019904]; RNA polymerase II activating transcription factor binding [GO:0001102]; aggresome assembly [GO:0070842]; ascospore formation [GO:0030437]; DNA damage checkpoint [GO:0000077]; fungal-typ…	cytoplasm [GO:0005737]; cytoplasmic stress granule [GO:0010494]; nucleus [GO:0005634]	aggresome assembly [GO:0070842]; ascospore formation [GO:0030437]; DNA damage checkpoint [GO:0000077]; fungal-type cell wall chitin biosynthetic process [GO:0034221]; glycogen metabolic process [GO:0005977]; mitotic spindle orientation checkpoint [GO:0031578]; negative regulation of apoptotic process [GO:0043066]; negative regulation of transcription from RNA polymerase II promoter [GO:0000122]; …	DNA replication origin binding [GO:0003688]; phosphoserine binding [GO:0050815]; protein domain specific binding [GO:0019904]; RNA polymerase II activating transcription factor binding [GO:0001102]
DMC1	25.01717894	111.6835724	-2.158425976	1.45E-05	0.000426837	P29311	BMH1_YEAST	Protein BMH1	DMC1 ISC2 YER179W	334	condensed nuclear chromosome [GO:0000794]; nucleoplasm [GO:0005654]; nucleus [GO:0005634]; ATP binding [GO:0005524]; ATPase activity [GO:0016887]; DNA-dependent ATPase activity [GO:0008094]; double-stranded DNA binding [GO:0003690]; four-way junction DNA binding [GO:0000400]; recombinase activity [GO:0000150]; single-stranded DNA binding [GO:0003697]; chiasma assembly [GO:0051026]; DNA recombinas…	condensed nuclear chromosome [GO:0000794]; nucleoplasm [GO:0005654]; nucleus [GO:0005634]	chiasma assembly [GO:0051026]; DNA recombinase assembly [GO:0000730]; meiotic cell cycle [GO:0051321]; meiotic joint molecule formation [GO:0000709]; mitotic recombination [GO:0006312]; reciprocal meiotic recombination [GO:0007131]; response to ionizing radiation [GO:0010212]; sporulation resulting in formation of a cellular spore [GO:0030435]; strand invasion [GO:0042148]; synaptonemal complex a…	ATPase activity [GO:0016887]; ATP binding [GO:0005524]; DNA-dependent ATPase activity [GO:0008094]; double-stranded DNA binding [GO:0003690]; four-way junction DNA binding [GO:0000400]; recombinase activity [GO:0000150]; single-stranded DNA binding [GO:0003697]
GAT1	67.15604811	171.8508372	-1.35556764	0.000231689	0.004967858	P25453	DMC1_YEAST	Meiotic recombination protein DMC1	GAT1 YFL021W	510	cytosol [GO:0005829]; nucleus [GO:0005634]; transcription factor complex [GO:0005667]; chromatin binding [GO:0003682]; RNA polymerase II regulatory region sequence-specific DNA binding [GO:0000977]; RNA polymerase II transcription factor binding [GO:0001085]; sequence-specific DNA binding [GO:0043565]; transcription factor activity, RNA polymerase II transcription factor binding [GO:0001076]; tra…	cytosol [GO:0005829]; nucleus [GO:0005634]; transcription factor complex [GO:0005667]	cell differentiation [GO:0030154]; nitrogen catabolite activation of transcription [GO:0090294]; nitrogen catabolite activation of transcription from RNA polymerase II promoter [GO:0001080]	chromatin binding [GO:0003682]; RNA polymerase II regulatory region sequence-specific DNA binding [GO:0000977]; RNA polymerase II transcription factor binding [GO:0001085]; sequence-specific DNA binding [GO:0043565]; transcriptional activator activity, RNA polymerase II core promoter proximal region sequence-specific binding [GO:0001077]; transcription factor activity, RNA polymerase II transcrip…
HSP12	7615.515612	11226.2915	-0.559867802	1.71E-05	0.000497655	P43574	GAT1_YEAST	Transcriptional regulatory protein GAT1	HSP12 GLP1 HOR5 YFL014W	109	cytosol [GO:0005829]; endosome [GO:0005768]; plasma membrane [GO:0005886]; lipid binding [GO:0008289]; cell adhesion [GO:0007155]; cellular response to heat [GO:0034605]; cellular response to osmotic stress [GO:0071470]; cellular response to oxidative stress [GO:0034599]; plasma membrane organization [GO:0007009]	cytosol [GO:0005829]; endosome [GO:0005768]; plasma membrane [GO:0005886]	cell adhesion [GO:0007155]; cellular response to heat [GO:0034605]; cellular response to osmotic stress [GO:0071470]; cellular response to oxidative stress [GO:0034599]; plasma membrane organization [GO:0007009]	lipid binding [GO:0008289]
BLM10	149.8993893	353.4452544	-1.237492265	5.34E-06	0.000183033	P22943	HSP12_YEAST	12 kDa heat shock protein (Glucose and lipid-regulated protein)	BLM10 BLM3 YFL007W YFL006W	2143	nucleus [GO:0005634]; proteasome storage granule [GO:0034515]; lysine-acetylated histone binding [GO:0070577]; peptidase activator activity [GO:0016504]; proteasome binding [GO:0070628]; cellular response to DNA damage stimulus [GO:0006974]; DNA repair [GO:0006281]; histone exchange [GO:0043486]; proteasomal ubiquitin-independent protein catabolic process [GO:0010499]; proteasome assembly [GO:004…	nucleus [GO:0005634]; proteasome storage granule [GO:0034515]	cellular response to DNA damage stimulus [GO:0006974]; DNA repair [GO:0006281]; histone exchange [GO:0043486]; proteasomal ubiquitin-independent protein catabolic process [GO:0010499]; proteasome assembly [GO:0043248]; proteasome core complex import into nucleus [GO:1990236]; regulation of proteasomal protein catabolic process [GO:0061136]; sequestration of proteasome core complex in proteasome s…	lysine-acetylated histone binding [GO:0070577]; peptidase activator activity [GO:0016504]; proteasome binding [GO:0070628]
SPB4	58.60515442	133.1078992	-1.183496727	0.002882282	0.038626062	P43583	BLM10_YEAST	Proteasome activator BLM10 (Bleomycin resistance protein BLM10)	SPB4 YFL002C	606	90S preribosome [GO:0030686]; cytoplasm [GO:0005737]; nucleolus [GO:0005730]; nucleoplasm [GO:0005654]; ATP binding [GO:0005524]; ATP-dependent RNA helicase activity [GO:0004004]; RNA binding [GO:0003723]; assembly of large subunit precursor of preribosome [GO:1902626]; maturation of LSU-rRNA [GO:0000470]; ribosomal large subunit assembly [GO:0000027]; RNA secondary structure unwinding [GO:001050…	90S preribosome [GO:0030686]; cytoplasm [GO:0005737]; nucleolus [GO:0005730]; nucleoplasm [GO:0005654]	assembly of large subunit precursor of preribosome [GO:1902626]; maturation of LSU-rRNA [GO:0000470]; ribosomal large subunit assembly [GO:0000027]; RNA secondary structure unwinding [GO:0010501]	ATP binding [GO:0005524]; ATP-dependent RNA helicase activity [GO:0004004]; RNA binding [GO:0003723]
LOC1	70.15352922	151.8953128	-1.114489763	0.003128302	0.041094509	P25808	SPB4_YEAST	ATP-dependent rRNA helicase SPB4 (EC 3.6.4.13) (Suppressor of PAB1 protein 4)	LOC1 YFR001W	204	nucleolus [GO:0005730]; preribosome, large subunit precursor [GO:0030687]; identical protein binding [GO:0042802]; mRNA binding [GO:0003729]; endonucleolytic cleavage in 5'-ETS of tricistronic rRNA transcript (SSU-rRNA, 5.8S rRNA, LSU-rRNA) [GO:0000480]; endonucleolytic cleavage in ITS1 to separate SSU-rRNA from 5.8S rRNA and LSU-rRNA from tricistronic rRNA transcript (SSU-rRNA, 5.8S rRNA, LSU-rR…	nucleolus [GO:0005730]; preribosome, large subunit precursor [GO:0030687]	endonucleolytic cleavage in 5'-ETS of tricistronic rRNA transcript (SSU-rRNA, 5.8S rRNA, LSU-rRNA) [GO:0000480]; endonucleolytic cleavage in ITS1 to separate SSU-rRNA from 5.8S rRNA and LSU-rRNA from tricistronic rRNA transcript (SSU-rRNA, 5.8S rRNA, LSU-rRNA) [GO:0000447]; endonucleolytic cleavage to generate mature 5'-end of SSU-rRNA from (SSU-rRNA, 5.8S rRNA, LSU-rRNA) [GO:0000472]; intracellu…	identical protein binding [GO:0042802]; mRNA binding [GO:0003729]
POX1	150.0229199	400.1519223	-1.415364913	4.74E-08	2.54E-06	P43586	LOC1_YEAST	60S ribosomal subunit assembly/export protein LOC1 (Localization of ASH1 mRNA protein 1)	POX1 FOX1 YGL205W	748	peroxisomal matrix [GO:0005782]; acyl-CoA dehydrogenase activity [GO:0003995]; acyl-CoA oxidase activity [GO:0003997]; FAD binding [GO:0071949]; flavin adenine dinucleotide binding [GO:0050660]; fatty acid beta-oxidation [GO:0006635]; fatty acid beta-oxidation using acyl-CoA dehydrogenase [GO:0033539]; fatty acid beta-oxidation using acyl-CoA oxidase [GO:0033540]	peroxisomal matrix [GO:0005782]	fatty acid beta-oxidation [GO:0006635]; fatty acid beta-oxidation using acyl-CoA dehydrogenase [GO:0033539]; fatty acid beta-oxidation using acyl-CoA oxidase [GO:0033540]	acyl-CoA dehydrogenase activity [GO:0003995]; acyl-CoA oxidase activity [GO:0003997]; FAD binding [GO:0071949]; flavin adenine dinucleotide binding [GO:0050660]
FMP37	233.4771835	401.4491024	-0.781935518	0.001665166	0.025860648	P13711	ACOX_YEAST	Acyl-coenzyme A oxidase (Acyl-CoA oxidase) (EC 1.3.3.6)	MPC1 FMP37 YGL080W	130	integral component of mitochondrial inner membrane [GO:0031305]; pyruvate transmembrane transporter activity [GO:0050833]; mitochondrial pyruvate transmembrane transport [GO:1902361]; mitochondrial pyruvate transport [GO:0006850]	integral component of mitochondrial inner membrane [GO:0031305]	mitochondrial pyruvate transmembrane transport [GO:1902361]; mitochondrial pyruvate transport [GO:0006850]	pyruvate transmembrane transporter activity [GO:0050833]
SDS23	0	52.56160851	#NAME?	0.003564328	0.045737616	P53157	MPC1_YEAST	Mitochondrial pyruvate carrier 1 (MPC1) (Protein FMP37)	SDS23 YGL056C	527	cytoplasm [GO:0005737]; nucleus [GO:0005634]; cell separation after cytokinesis [GO:0000920]; cellular response to glucose starvation [GO:0042149]; regulation of mitotic metaphase/anaphase transition [GO:0030071]	cytoplasm [GO:0005737]; nucleus [GO:0005634]	cell separation after cytokinesis [GO:0000920]; cellular response to glucose starvation [GO:0042149]; regulation of mitotic metaphase/anaphase transition [GO:0030071]
OLE1	551.1275864	1324.507609	-1.264997884	1.20E-14	1.70E-12	P53172	SDS23_YEAST	Protein SDS23	OLE1 YGL055W	510	integral component of endoplasmic reticulum membrane [GO:0030176]; electron carrier activity [GO:0009055]; heme binding [GO:0020037]; metal ion binding [GO:0046872]; stearoyl-CoA 9-desaturase activity [GO:0004768]; mitochondrion inheritance [GO:0000001]; unsaturated fatty acid biosynthetic process [GO:0006636]	integral component of endoplasmic reticulum membrane [GO:0030176]	mitochondrion inheritance [GO:0000001]; unsaturated fatty acid biosynthetic process [GO:0006636]	electron carrier activity [GO:0009055]; heme binding [GO:0020037]; metal ion binding [GO:0046872]; stearoyl-CoA 9-desaturase activity [GO:0004768]
STF2	2643.484608	3941.913608	-0.576455232	0.001329108	0.021706581	P21147	ACO1_YEAST	Acyl-CoA desaturase 1 (EC 1.14.19.1) (Delta 9 fatty acid desaturase) (Fatty acid desaturase 1) (Stearoyl-CoA desaturase 1)	STF2 YGR008C G3858	84	cytoplasm [GO:0005737]; mitochondrion [GO:0005739]; cellular response to desiccation [GO:0071465]	cytoplasm [GO:0005737]; mitochondrion [GO:0005739]	cellular response to desiccation [GO:0071465]
ACB1	784.3154943	1310.636244	-0.740761327	1.07E-05	0.000329576	P16965	STF2_YEAST	ATPase-stabilizing factor 15 kDa protein	ACB1 ACB YGR037C	87	cytosol [GO:0005829]; extracellular region [GO:0005576]; plasma membrane [GO:0005886]; fatty-acyl-CoA binding [GO:0000062]; long-chain fatty acid transporter activity [GO:0005324]; phosphatidylcholine binding [GO:0031210]; chronological cell aging [GO:0001300]; long-chain fatty acid transport [GO:0015909]; response to freezing [GO:0050826]; response to hypoxia [GO:0001666]	cytosol [GO:0005829]; extracellular region [GO:0005576]; plasma membrane [GO:0005886]	chronological cell aging [GO:0001300]; long-chain fatty acid transport [GO:0015909]; response to freezing [GO:0050826]; response to hypoxia [GO:0001666]	fatty-acyl-CoA binding [GO:0000062]; long-chain fatty acid transporter activity [GO:0005324]; phosphatidylcholine binding [GO:0031210]
ERG25	332.5834534	777.8523231	-1.225779889	3.03E-08	1.71E-06	P31787	ACBP_YEAST	Acyl-CoA-binding protein (ACBP)	ERG25 FET6 YGR060W	309	endoplasmic reticulum membrane [GO:0005789]; integral component of membrane [GO:0016021]; plasma membrane [GO:0005886]; C-4 methylsterol oxidase activity [GO:0000254]; iron ion binding [GO:0005506]; ergosterol biosynthetic process [GO:0006696]	endoplasmic reticulum membrane [GO:0005789]; integral component of membrane [GO:0016021]; plasma membrane [GO:0005886]	ergosterol biosynthetic process [GO:0006696]	C-4 methylsterol oxidase activity [GO:0000254]; iron ion binding [GO:0005506]
VHT1	410.4576146	688.4522228	-0.746123286	0.001343047	0.021773746	P53045	MSMO_YEAST	Methylsterol monooxygenase (EC 1.14.13.72) (C-4 methylsterol oxidase)	VHT1 YGR065C	593	integral component of membrane [GO:0016021]; plasma membrane [GO:0005886]; biotin transporter activity [GO:0015225]; symporter activity [GO:0015293]; biotin transport [GO:0015878]	integral component of membrane [GO:0016021]; plasma membrane [GO:0005886]	biotin transport [GO:0015878]	biotin transporter activity [GO:0015225]; symporter activity [GO:0015293]
YGR067C	144.27591	558.7196679	-1.953294176	3.10E-17	6.44E-15	P53241	VHT1_YEAST	Vitamin H transporter (H(+)/biotin symporter)	YGR067C	804	nucleus [GO:0005634]; DNA binding [GO:0003677]; metal ion binding [GO:0046872]	nucleus [GO:0005634]		DNA binding [GO:0003677]; metal ion binding [GO:0046872]
PAC10	0	51.35243555	#NAME?	0.000135033	0.003095059	P53243	YG2A_YEAST	Zinc finger protein YGR067C	PAC10 GIM2 PFD3 YGR078C	199	cytoplasm [GO:0005737]; cytosol [GO:0005829]; polysome [GO:0005844]; prefoldin complex [GO:0016272]; tubulin binding [GO:0015631]; microtubule-based process [GO:0007017]; protein folding [GO:0006457]; tubulin complex assembly [GO:0007021]	cytoplasm [GO:0005737]; cytosol [GO:0005829]; polysome [GO:0005844]; prefoldin complex [GO:0016272]	microtubule-based process [GO:0007017]; protein folding [GO:0006457]; tubulin complex assembly [GO:0007021]	tubulin binding [GO:0015631]
MEP1	96.29113675	221.1004474	-1.19922703	0.000308824	0.006375018	P48363	PFD3_YEAST	Prefoldin subunit 3 (Genes involved in microtubule biogenesis protein 2) (Gim complex subunit 2) (GimC subunit 2)	MEP1 AMT1 YGR121C G6331	492	integral component of membrane [GO:0016021]; plasma membrane [GO:0005886]; ammonium transmembrane transporter activity [GO:0008519]; ammonium transport [GO:0015696]; nitrogen utilization [GO:0019740]	integral component of membrane [GO:0016021]; plasma membrane [GO:0005886]	ammonium transport [GO:0015696]; nitrogen utilization [GO:0019740]	ammonium transmembrane transporter activity [GO:0008519]
SPG1	912.0805799	2332.323726	-1.354534855	2.50E-15	3.96E-13	P40260	MEP1_YEAST	Ammonium transporter MEP1	SPG1 YGR236C G8578	95	integral component of membrane [GO:0016021]; mitochondrial membrane [GO:0031966]	integral component of membrane [GO:0016021]; mitochondrial membrane [GO:0031966]
FMP43	442.8351919	1109.393858	-1.324929862	2.29E-13	2.77E-11	P50088	SPG1_YEAST	Stationary phase gene 1 protein	MPC3 FMP43 YGR243W G8620	146	integral component of mitochondrial inner membrane [GO:0031305]; mitochondrial membrane [GO:0031966]; pyruvate transmembrane transporter activity [GO:0050833]; mitochondrial pyruvate transmembrane transport [GO:1902361]; mitochondrial pyruvate transport [GO:0006850]	integral component of mitochondrial inner membrane [GO:0031305]; mitochondrial membrane [GO:0031966]	mitochondrial pyruvate transmembrane transport [GO:1902361]; mitochondrial pyruvate transport [GO:0006850]	pyruvate transmembrane transporter activity [GO:0050833]
LSC2	225.5228774	392.3127886	-0.798730575	0.001579452	0.024819432	P53311	MPC3_YEAST	Mitochondrial pyruvate carrier 3 (MPC3) (Protein FMP43)	LSC2 YGR244C G8625	427	mitochondrion [GO:0005739]; ATP binding [GO:0005524]; copper ion binding [GO:0005507]; succinate-CoA ligase (ADP-forming) activity [GO:0004775]; response to cadmium ion [GO:0046686]; succinyl-CoA metabolic process [GO:0006104]; tricarboxylic acid cycle [GO:0006099]	mitochondrion [GO:0005739]	response to cadmium ion [GO:0046686]; succinyl-CoA metabolic process [GO:0006104]; tricarboxylic acid cycle [GO:0006099]	ATP binding [GO:0005524]; copper ion binding [GO:0005507]; succinate-CoA ligase (ADP-forming) activity [GO:0004775]
GND2	93.85221995	217.1208189	-1.210035292	0.00033245	0.00677851	P53312	SUCB_YEAST	Succinate--CoA ligase [ADP-forming] subunit beta, mitochondrial (EC 6.2.1.5) (Succinyl-CoA synthetase beta chain) (SCS-beta)	GND2 YGR256W G9170	492	cytosol [GO:0005829]; phosphogluconate dehydrogenase (decarboxylating) activity [GO:0004616]; D-gluconate metabolic process [GO:0019521]; pentose-phosphate shunt, oxidative branch [GO:0009051]	cytosol [GO:0005829]	D-gluconate metabolic process [GO:0019521]; pentose-phosphate shunt, oxidative branch [GO:0009051]	phosphogluconate dehydrogenase (decarboxylating) activity [GO:0004616]
COS8	51.67327391	164.2103782	-1.668055111	1.40E-05	0.000415513	P53319	6PGD2_YEAST	6-phosphogluconate dehydrogenase, decarboxylating 2 (EC 1.1.1.44)	COS8 YHL048W	381	endosome [GO:0005768]; integral component of membrane [GO:0016021]; membrane [GO:0016020]; nuclear envelope [GO:0005635]; receptor activity [GO:0004872]; protein targeting to vacuole involved in ubiquitin-dependent protein catabolic process via the multivesicular body sorting pathway [GO:0043328]; vesicle-mediated transport [GO:0016192]	endosome [GO:0005768]; integral component of membrane [GO:0016021]; membrane [GO:0016020]; nuclear envelope [GO:0005635]	protein targeting to vacuole involved in ubiquitin-dependent protein catabolic process via the multivesicular body sorting pathway [GO:0043328]; vesicle-mediated transport [GO:0016192]	receptor activity [GO:0004872]
ARN2	296.3962537	552.1292783	-0.897478894	0.000114744	0.002714236	P38723	COS8_YEAST	Protein COS8	ARN2 TAF1 YHL047C	620	endosome membrane [GO:0010008]; integral component of plasma membrane [GO:0005887]; plasma membrane [GO:0005886]; siderophore transmembrane transporter activity [GO:0015343]; cellular iron ion homeostasis [GO:0006879]; iron assimilation by chelation and transport [GO:0033214]; siderophore metabolic process [GO:0009237]; siderophore transport [GO:0015891]	endosome membrane [GO:0010008]; integral component of plasma membrane [GO:0005887]; plasma membrane [GO:0005886]	cellular iron ion homeostasis [GO:0006879]; iron assimilation by chelation and transport [GO:0033214]; siderophore metabolic process [GO:0009237]; siderophore transport [GO:0015891]	siderophore transmembrane transporter activity [GO:0015343]
DUR3	20.37069479	69.75144582	-1.775727934	0.002771851	0.037448157	P38724	ARN2_YEAST	Siderophore iron transporter ARN2 (Triacetylfusarinine C permease) (Triacetylfusarinine C transporter 1)	DUR3 YHL016C	735	integral component of plasma membrane [GO:0005887]; plasma membrane [GO:0005886]; putrescine transmembrane transporter activity [GO:0015489]; spermidine transmembrane transporter activity [GO:0015606]; symporter activity [GO:0015293]; urea transmembrane transporter activity [GO:0015204]; cellular response to nitrogen starvation [GO:0006995]; putrescine transport [GO:0015847]; spermidine transport…	integral component of plasma membrane [GO:0005887]; plasma membrane [GO:0005886]	cellular response to nitrogen starvation [GO:0006995]; putrescine transport [GO:0015847]; spermidine transport [GO:0015848]; urea catabolic process [GO:0043419]; urea transport [GO:0015840]	putrescine transmembrane transporter activity [GO:0015489]; spermidine transmembrane transporter activity [GO:0015606]; symporter activity [GO:0015293]; urea transmembrane transporter activity [GO:0015204]
OSH3	46.06434393	126.5187052	-1.457628325	0.000606645	0.011232221	P33413	DUR3_YEAST	Urea active transporter	OSH3 YHR073W	996	cortical endoplasmic reticulum [GO:0032541]; cytoplasm [GO:0005737]; integral component of membrane [GO:0016021]; plasma membrane [GO:0005886]; 1-phosphatidylinositol binding [GO:0005545]; lipid binding [GO:0008289]; oxysterol binding [GO:0008142]; sterol transporter activity [GO:0015248]; endocytosis [GO:0006897]; ER to Golgi ceramide transport [GO:0035621]; exocytosis [GO:0006887]; invasive gro…	cortical endoplasmic reticulum [GO:0032541]; cytoplasm [GO:0005737]; integral component of membrane [GO:0016021]; plasma membrane [GO:0005886]	endocytosis [GO:0006897]; ER to Golgi ceramide transport [GO:0035621]; exocytosis [GO:0006887]; invasive growth in response to glucose limitation [GO:0001403]; karyogamy involved in conjugation with cellular fusion [GO:0000742]; maintenance of cell polarity [GO:0030011]; piecemeal microautophagy of nucleus [GO:0034727]; positive regulation of phosphatase activity [GO:0010922]; pseudohyphal growth…	1-phosphatidylinositol binding [GO:0005545]; lipid binding [GO:0008289]; oxysterol binding [GO:0008142]; sterol transporter activity [GO:0015248]
HXT5	574.4467608	1630.23152	-1.504831769	1.10E-22	5.60E-20	P38713	OSH3_YEAST	Oxysterol-binding protein homolog 3	HXT5 YHR096C	592	integral component of membrane [GO:0016021]; plasma membrane [GO:0005886]; fructose transmembrane transporter activity [GO:0005353]; glucose transmembrane transporter activity [GO:0005355]; mannose transmembrane transporter activity [GO:0015578]; sugar:proton symporter activity [GO:0005351]; glucose import [GO:0046323]; glucose transport [GO:0015758]; hexose transport [GO:0008645]	integral component of membrane [GO:0016021]; plasma membrane [GO:0005886]	glucose import [GO:0046323]; glucose transport [GO:0015758]; hexose transport [GO:0008645]	fructose transmembrane transporter activity [GO:0005353]; glucose transmembrane transporter activity [GO:0005355]; mannose transmembrane transporter activity [GO:0015578]; sugar:proton symporter activity [GO:0005351]
IGO2	128.6051632	250.0409325	-0.959215723	0.001419508	0.022736075	P38695	HXT5_YEAST	Probable glucose transporter HXT5	IGO2 YHR132W-A	131	cytoplasm [GO:0005737]; nucleus [GO:0005634]; protein phosphatase inhibitor activity [GO:0004864]; negative regulation of nuclear-transcribed mRNA catabolic process, deadenylation-dependent decay [GO:1900152]; negative regulation of protein dephosphorylation [GO:0035308]; positive regulation of G1 to G0 transition [GO:1903452]; positive regulation of mitotic cell cycle phase transition [GO:190199…	cytoplasm [GO:0005737]; nucleus [GO:0005634]	negative regulation of nuclear-transcribed mRNA catabolic process, deadenylation-dependent decay [GO:1900152]; negative regulation of protein dephosphorylation [GO:0035308]; positive regulation of G1 to G0 transition [GO:1903452]; positive regulation of mitotic cell cycle phase transition [GO:1901992]; positive regulation of protein serine/threonine phosphatase activity [GO:1905184]	protein phosphatase inhibitor activity [GO:0004864]
YHR138C	600.9225614	1003.308579	-0.739514398	7.51E-05	0.00184801	Q9P305	IGO2_YEAST	mRNA stability protein IGO2 (Initiation of G zero protein 2)	YHR138C	114	fungal-type vacuole [GO:0000324]; endopeptidase inhibitor activity [GO:0004866]; vacuole fusion, non-autophagic [GO:0042144]	fungal-type vacuole [GO:0000324]	vacuole fusion, non-autophagic [GO:0042144]	endopeptidase inhibitor activity [GO:0004866]
SPS100	449.8050957	1294.729363	-1.525278653	2.68E-20	9.36E-18	P38841	YHT8_YEAST	Uncharacterized protein YHR138C	SPS100 YHR139C	326	ascospore wall [GO:0005619]; asparaginase activity [GO:0004067]; ascospore wall assembly [GO:0030476]; asparagine catabolic process [GO:0006530]	ascospore wall [GO:0005619]	ascospore wall assembly [GO:0030476]; asparagine catabolic process [GO:0006530]	asparaginase activity [GO:0004067]
YHR219W	84.47133564	205.7555924	-1.284397876	0.000196396	0.004337031	P13130	SS100_YEAST	Sporulation-specific wall maturation protein	YHR219W	624
YIL161W	0	55.58543411	#NAME?	7.23E-06	0.000234336	P38900	YH19_YEAST	Putative uncharacterized protein YHR219W	YIL161W	235
POT1	106.9159802	315.0178369	-1.558956017	7.97E-08	4.04E-06	P40449	YIQ1_YEAST	Uncharacterized protein YIL161W	POT1 FOX3 POX3 YIL160C	417	mitochondrial intermembrane space [GO:0005758]; peroxisomal matrix [GO:0005782]; peroxisome [GO:0005777]; acetyl-CoA C-acyltransferase activity [GO:0003988]; mRNA binding [GO:0003729]; fatty acid beta-oxidation [GO:0006635]	mitochondrial intermembrane space [GO:0005758]; peroxisomal matrix [GO:0005782]; peroxisome [GO:0005777]	fatty acid beta-oxidation [GO:0006635]	acetyl-CoA C-acyltransferase activity [GO:0003988]; mRNA binding [GO:0003729]
YIL156W-B	181.7994473	323.4154242	-0.831040672	0.002732476	0.037142674	P36002	PTK1_YEAST	Serine/threonine-protein kinase PTK1/STK1 (EC 2.7.11.1)	YIL156W-B	73
GUT2	188.4287493	389.9277544	-1.049187748	3.79E-05	0.001002763	Q2V2P4	YI156_YEAST	Uncharacterized protein YIL156W-B	GUT2 YIL155C	649	glycerol-3-phosphate dehydrogenase complex [GO:0009331]; integral component of mitochondrial outer membrane [GO:0031307]; mitochondrial inner membrane [GO:0005743]; mitochondrion [GO:0005739]; glycerol-3-phosphate dehydrogenase activity [GO:0004368]; sn-glycerol-3-phosphate:ubiquinone-8 oxidoreductase activity [GO:0052591]; glycerol catabolic process [GO:0019563]; glycerol metabolic process [GO:0…	glycerol-3-phosphate dehydrogenase complex [GO:0009331]; integral component of mitochondrial outer membrane [GO:0031307]; mitochondrial inner membrane [GO:0005743]; mitochondrion [GO:0005739]	glycerol catabolic process [GO:0019563]; glycerol metabolic process [GO:0006071]; glycerophosphate shuttle [GO:0006127]; NADH oxidation [GO:0006116]; replicative cell aging [GO:0001302]	glycerol-3-phosphate dehydrogenase activity [GO:0004368]; sn-glycerol-3-phosphate:ubiquinone-8 oxidoreductase activity [GO:0052591]
TAO3	75.09045133	162.3624138	-1.112516326	0.002849352	0.038417129	P32191	GPDM_YEAST	Glycerol-3-phosphate dehydrogenase, mitochondrial (GPD-M) (GPDH-M) (EC 1.1.5.3)	TAO3 PAG1 YIL129C	2376	cell cortex [GO:0005938]; cellular bud [GO:0005933]; incipient cellular bud site [GO:0000131]; mating projection tip [GO:0043332]; actin filament reorganization [GO:0090527]; budding cell apical bud growth [GO:0007118]; cell budding [GO:0007114]; cell morphogenesis [GO:0000902]	cell cortex [GO:0005938]; cellular bud [GO:0005933]; incipient cellular bud site [GO:0000131]; mating projection tip [GO:0043332]	actin filament reorganization [GO:0090527]; budding cell apical bud growth [GO:0007118]; cell budding [GO:0007114]; cell morphogenesis [GO:0000902]
RGI2	188.6223465	925.5372167	-2.294790398	1.15E-25	9.58E-23	P40468	TAO3_YEAST	Cell morphogenesis protein PAG1 (Protein TAO3)	RGI2 YIL057C	164	cytoplasm [GO:0005737]; energy reserve metabolic process [GO:0006112]	cytoplasm [GO:0005737]	energy reserve metabolic process [GO:0006112]
YIR016W	118.8593119	229.8302515	-0.951313772	0.002349653	0.033587405	P40188	RGI2_YEAST	Respiratory growth induced protein 2	YIR016W	265	ATP binding [GO:0005524]			ATP binding [GO:0005524]
DAL3	92.48919255	412.5927795	-2.157361874	2.38E-15	3.96E-13	P40572	YIT6_YEAST	Uncharacterized protein YIR016W	DAL3 YIR032C	195	membrane [GO:0016020]; ureidoglycolate hydrolase activity [GO:0004848]; ureidoglycolate lyase activity [GO:0050385]; allantoin catabolic process [GO:0000256]; purine nucleobase metabolic process [GO:0006144]	membrane [GO:0016020]	allantoin catabolic process [GO:0000256]; purine nucleobase metabolic process [GO:0006144]	ureidoglycolate hydrolase activity [GO:0004848]; ureidoglycolate lyase activity [GO:0050385]
GTT1	380.4592455	650.4144041	-0.773617286	0.000875731	0.015198387	P32459	ALLA_YEAST	Ureidoglycolate lyase (EC 4.3.2.3) (Degradation of allantoin protein 3) (Ureidoglycolatase) (Ureidoglycolate hydrolase)	GTT1 YIR038C	234	endoplasmic reticulum [GO:0005783]; endoplasmic reticulum membrane [GO:0005789]; glutathione peroxidase activity [GO:0004602]; glutathione transferase activity [GO:0004364]; glutathione metabolic process [GO:0006749]; protein glutathionylation [GO:0010731]	endoplasmic reticulum [GO:0005783]; endoplasmic reticulum membrane [GO:0005789]	glutathione metabolic process [GO:0006749]; protein glutathionylation [GO:0010731]	glutathione peroxidase activity [GO:0004602]; glutathione transferase activity [GO:0004364]
SIP4	54.80321023	179.301863	-1.710058169	3.32E-06	0.000118655	P40582	GST1_YEAST	Glutathione S-transferase 1 (EC 2.5.1.18) (GST-I)	SIP4 YJL089W J0922	829	nucleus [GO:0005634]; RNA polymerase II core promoter proximal region sequence-specific DNA binding [GO:0000978]; transcriptional activator activity, RNA polymerase II core promoter proximal region sequence-specific binding [GO:0001077]; zinc ion binding [GO:0008270]; negative regulation of invasive growth in response to glucose limitation [GO:2000218]; positive regulation of gluconeogenesis [GO:…	nucleus [GO:0005634]	negative regulation of invasive growth in response to glucose limitation [GO:2000218]; positive regulation of gluconeogenesis [GO:0045722]; positive regulation of gluconeogenesis by positive regulation of transcription from RNA polymerase II promoter [GO:0035948]; positive regulation of transcription from RNA polymerase II promoter by a nonfermentable carbon source [GO:0061414]	RNA polymerase II core promoter proximal region sequence-specific DNA binding [GO:0000978]; transcriptional activator activity, RNA polymerase II core promoter proximal region sequence-specific binding [GO:0001077]; zinc ion binding [GO:0008270]
ARG3	122.8037983	250.5794933	-1.02891317	0.000605754	0.011232221	P46954	SIP4_YEAST	Protein SIP4	ARG3 YJL088W J0924	338	cytosol [GO:0005829]; mitochondrion [GO:0005739]; amino acid binding [GO:0016597]; ornithine carbamoyltransferase activity [GO:0004585]; arginine biosynthetic process [GO:0006526]; arginine biosynthetic process via ornithine [GO:0042450]; urea cycle [GO:0000050]	cytosol [GO:0005829]; mitochondrion [GO:0005739]	arginine biosynthetic process [GO:0006526]; arginine biosynthetic process via ornithine [GO:0042450]; urea cycle [GO:0000050]	amino acid binding [GO:0016597]; ornithine carbamoyltransferase activity [GO:0004585]
YJL045W	0	41.95798327	#NAME?	0.002149249	0.031507751	P05150	OTC_YEAST	Ornithine carbamoyltransferase (EC 2.1.3.3) (Ornithine transcarbamylase) (OTCase)	YJL045W J1194	634	mitochondrial respiratory chain complex II, succinate dehydrogenase complex (ubiquinone) [GO:0005749]; electron carrier activity [GO:0009055]; flavin adenine dinucleotide binding [GO:0050660]; succinate dehydrogenase (ubiquinone) activity [GO:0008177]; anaerobic respiration [GO:0009061]; cellular respiration [GO:0045333]; mitochondrial electron transport, succinate to ubiquinone [GO:0006121]; tri…	mitochondrial respiratory chain complex II, succinate dehydrogenase complex (ubiquinone) [GO:0005749]	anaerobic respiration [GO:0009061]; cellular respiration [GO:0045333]; mitochondrial electron transport, succinate to ubiquinone [GO:0006121]; tricarboxylic acid cycle [GO:0006099]	electron carrier activity [GO:0009055]; flavin adenine dinucleotide binding [GO:0050660]; succinate dehydrogenase (ubiquinone) activity [GO:0008177]
BNA1	105.5930297	218.3317782	-1.048007526	0.001490451	0.023701022	P47052	SDHX_YEAST	Succinate dehydrogenase [ubiquinone] flavoprotein subunit 2, mitochondrial (EC 1.3.5.1) (Flavoprotein subunit of complex II) (FP) (SDH1b)	BNA1 HAD1 YJR025C J1550	177	cytoplasm [GO:0005737]; nucleus [GO:0005634]; 3-hydroxyanthranilate 3,4-dioxygenase activity [GO:0000334]; iron ion binding [GO:0005506]; 'de novo' NAD biosynthetic process from tryptophan [GO:0034354]	cytoplasm [GO:0005737]; nucleus [GO:0005634]	'de novo' NAD biosynthetic process from tryptophan [GO:0034354]	3-hydroxyanthranilate 3,4-dioxygenase activity [GO:0000334]; iron ion binding [GO:0005506]
IME1	66.66755053	170.669012	-1.356144509	0.000246292	0.005180709	P47096	3HAO_YEAST	3-hydroxyanthranilate 3,4-dioxygenase (EC 1.13.11.6) (3-hydroxyanthranilate oxygenase) (3-HAO) (3-hydroxyanthranilic acid dioxygenase) (HAD) (Biosynthesis of nicotinic acid protein 1)	IME1 YJR094C J1916	360	nucleus [GO:0005634]; transcription factor activity, transcription factor binding [GO:0000989]; meiotic cell cycle [GO:0051321]; positive regulation of transcription from RNA polymerase II promoter [GO:0045944]; pseudohyphal growth [GO:0007124]; regulation of meiotic nuclear division [GO:0040020]; regulation of transcription from RNA polymerase II promoter [GO:0006357]; sporulation resulting in f…	nucleus [GO:0005634]	meiotic cell cycle [GO:0051321]; positive regulation of transcription from RNA polymerase II promoter [GO:0045944]; pseudohyphal growth [GO:0007124]; regulation of meiotic nuclear division [GO:0040020]; regulation of transcription from RNA polymerase II promoter [GO:0006357]; sporulation resulting in formation of a cellular spore [GO:0030435]; transcription, DNA-templated [GO:0006351]	transcription factor activity, transcription factor binding [GO:0000989]
SFC1	391.4989487	1332.696771	-1.767268222	1.10E-26	1.05E-23	P21190	IME1_YEAST	Meiosis-inducing protein 1	SFC1 ACR1 YJR095W J1921	322	integral component of membrane [GO:0016021]; mitochondrial inner membrane [GO:0005743]; succinate:fumarate antiporter activity [GO:0005469]; fumarate transport [GO:0015741]; mitochondrial transport [GO:0006839]; succinate transport [GO:0015744]	integral component of membrane [GO:0016021]; mitochondrial inner membrane [GO:0005743]	fumarate transport [GO:0015741]; mitochondrial transport [GO:0006839]; succinate transport [GO:0015744]	succinate:fumarate antiporter activity [GO:0005469]
NNF1	0	20.24846561	#NAME?	0.000326339	0.006694978	P33303	SFC1_YEAST	Succinate/fumarate mitochondrial transporter (Regulator of acetyl-CoA synthase activity)	NNF1 YJR112W J2011	201	kinetochore [GO:0000776]; nuclear MIS12/MIND complex [GO:0000818]; cell cycle [GO:0007049]; cell division [GO:0051301]; chromosome segregation [GO:0007059]	kinetochore [GO:0000776]; nuclear MIS12/MIND complex [GO:0000818]	cell cycle [GO:0007049]; cell division [GO:0051301]; chromosome segregation [GO:0007059]
JEN1	280.6574937	611.6625202	-1.123925297	7.51E-07	3.14E-05	P47149	NNF1_YEAST	Kinetochore-associated protein NNF1	JEN1 YKL217W	616	integral component of membrane [GO:0016021]; plasma membrane [GO:0005886]; carbohydrate transmembrane transporter activity [GO:0015144]; secondary active monocarboxylate transmembrane transporter activity [GO:0015355]; selenite:proton symporter activity [GO:0097079]; plasma membrane lactate transport [GO:0035879]; plasma membrane pyruvate transport [GO:0006849]; plasma membrane selenite transport…	integral component of membrane [GO:0016021]; plasma membrane [GO:0005886]	plasma membrane lactate transport [GO:0035879]; plasma membrane pyruvate transport [GO:0006849]; plasma membrane selenite transport [GO:0097080]	carbohydrate transmembrane transporter activity [GO:0015144]; secondary active monocarboxylate transmembrane transporter activity [GO:0015355]; selenite:proton symporter activity [GO:0097079]
YKL187C	84.18982232	183.3739717	-1.123071133	0.001526809	0.024106179	P36035	JEN1_YEAST	Carboxylic acid transporter protein homolog	YKL187C	750	mitochondrion [GO:0005739]; plasma membrane [GO:0005886]; long-chain fatty acid transport [GO:0015909]	mitochondrion [GO:0005739]; plasma membrane [GO:0005886]	long-chain fatty acid transport [GO:0015909]
FAS1	869.8448701	1469.889807	-0.756877969	6.26E-06	0.000210056	P34231	YKS7_YEAST	Uncharacterized protein YKL187C	FAS1 YKL182W	2051	cytosol [GO:0005829]; fatty acid synthase complex [GO:0005835]; lipid particle [GO:0005811]; 3-hydroxyacyl-[acyl-carrier-protein] dehydratase activity [GO:0019171]; 3-hydroxyoctanoyl-[acyl-carrier-protein] dehydratase activity [GO:0047451]; [acyl-carrier-protein] S-acetyltransferase activity [GO:0004313]; [acyl-carrier-protein] S-malonyltransferase activity [GO:0004314]; enoyl-[acyl-carrier-prote…	cytosol [GO:0005829]; fatty acid synthase complex [GO:0005835]; lipid particle [GO:0005811]	long-chain fatty acid biosynthetic process [GO:0042759]	[acyl-carrier-protein] S-acetyltransferase activity [GO:0004313]; [acyl-carrier-protein] S-malonyltransferase activity [GO:0004314]; 3-hydroxyacyl-[acyl-carrier-protein] dehydratase activity [GO:0019171]; 3-hydroxyoctanoyl-[acyl-carrier-protein] dehydratase activity [GO:0047451]; enoyl-[acyl-carrier-protein] reductase (NADH) activity [GO:0004318]; enoyl-[acyl-carrier-protein] reductase (NADPH, B-…
SHE2	0	45.4626923	#NAME?	0.003687064	0.047130607	P07149	FAS1_YEAST	Fatty acid synthase subunit beta (EC 2.3.1.86) [Includes: 3-hydroxyacyl-[acyl-carrier-protein] dehydratase (EC 4.2.1.59); Enoyl-[acyl-carrier-protein] reductase [NADH] (EC 1.3.1.9); [Acyl-carrier-protein] acetyltransferase (EC 2.3.1.38); [Acyl-carrier-protein] malonyltransferase (EC 2.3.1.39); S-acyl fatty acid synthase thioesterase (EC 3.1.2.14)]	SHE2 YKL130C	246	cellular bud tip [GO:0005934]; cytoplasm [GO:0005737]; nucleus [GO:0005634]; lipid binding [GO:0008289]; mRNA binding [GO:0003729]; intracellular mRNA localization [GO:0008298]; mating type switching [GO:0007533]; mRNA transport [GO:0051028]	cellular bud tip [GO:0005934]; cytoplasm [GO:0005737]; nucleus [GO:0005634]	intracellular mRNA localization [GO:0008298]; mating type switching [GO:0007533]; mRNA transport [GO:0051028]	lipid binding [GO:0008289]; mRNA binding [GO:0003729]
YKL107W	46.01534242	118.3637556	-1.363040508	0.001506742	0.023900087	P36068	SHE2_YEAST	SWI5-dependent HO expression protein 2	YKL107W YKL462	309	integral component of membrane [GO:0016021]; oxidoreductase activity [GO:0016491]	integral component of membrane [GO:0016021]		oxidoreductase activity [GO:0016491]
YKL065W-A	128.0911381	260.3867146	-1.023485175	0.000495794	0.009469958	P34251	YKK7_YEAST	Uncharacterized oxidoreductase YKL107W (EC 1.-.-.-)	YKL065W-A	73	integral component of membrane [GO:0016021]	integral component of membrane [GO:0016021]
RGT1	59.70121783	133.1685587	-1.157421234	0.003368843	0.043821329	Q2V2P2	YK065_YEAST	Uncharacterized protein YKL065W-A	RGT1 YKL038W YKL251	1170	cytoplasm [GO:0005737]; nucleus [GO:0005634]; DNA binding [GO:0003677]; RNA polymerase II core promoter proximal region sequence-specific DNA binding [GO:0000978]; transcriptional activator activity, RNA polymerase II core promoter proximal region sequence-specific binding [GO:0001077]; transcriptional repressor activity, RNA polymerase II core promoter proximal region sequence-specific binding […	cytoplasm [GO:0005737]; nucleus [GO:0005634]	glucose metabolic process [GO:0006006]; glucose transport [GO:0015758]; negative regulation of transcription from RNA polymerase II promoter [GO:0000122]; positive regulation of transcription from RNA polymerase II promoter [GO:0045944]; positive regulation of transcription from RNA polymerase II promoter by a nonfermentable carbon source [GO:0061414]; regulation of glucose import [GO:0046324]	DNA binding [GO:0003677]; RNA polymerase II core promoter proximal region sequence-specific DNA binding [GO:0000978]; transcriptional activator activity, RNA polymerase II core promoter proximal region sequence-specific binding [GO:0001077]; transcriptional repressor activity, RNA polymerase II core promoter proximal region sequence-specific binding [GO:0001078]; transcriptional repressor activit…
TUL1	74.00447492	172.6201888	-1.221916789	0.001076533	0.017979179	P32862	RGT1_YEAST	Glucose transport transcription regulator RGT1 (Restores glucose transport protein 1)	TUL1 YKL034W YKL247	758	Dsc E3 ubiquitin ligase complex [GO:0044695]; Golgi apparatus [GO:0005794]; Golgi membrane [GO:0000139]; integral component of membrane [GO:0016021]; nucleus [GO:0005634]; ubiquitin protein ligase activity [GO:0061630]; ubiquitin-protein transferase activity [GO:0004842]; zinc ion binding [GO:0008270]; proteasome-mediated ubiquitin-dependent protein catabolic process [GO:0043161]; protein polyubi…	Dsc E3 ubiquitin ligase complex [GO:0044695]; Golgi apparatus [GO:0005794]; Golgi membrane [GO:0000139]; integral component of membrane [GO:0016021]; nucleus [GO:0005634]	proteasome-mediated ubiquitin-dependent protein catabolic process [GO:0043161]; protein polyubiquitination [GO:0000209]; protein ubiquitination [GO:0016567]; protein ubiquitination involved in ubiquitin-dependent protein catabolic process [GO:0042787]; ubiquitin-dependent protein catabolic process via the multivesicular body sorting pathway [GO:0043162]	ubiquitin protein ligase activity [GO:0061630]; ubiquitin-protein transferase activity [GO:0004842]; zinc ion binding [GO:0008270]
GAP1	129.212729	453.8227687	-1.812380792	5.14E-13	5.88E-11	P36096	TUL1_YEAST	Transmembrane E3 ubiquitin-protein ligase 1 (EC 2.3.2.27) (RING-type E3 ubiquitin transferase TUL1)	GAP1 YKR039W	602	endoplasmic reticulum membrane [GO:0005789]; endosome [GO:0005768]; ER to Golgi transport vesicle [GO:0030134]; fungal-type vacuole lumen [GO:0000328]; integral component of plasma membrane [GO:0005887]; multivesicular body [GO:0005771]; plasma membrane [GO:0005886]; amino acid transmembrane transporter activity [GO:0015171]; L-phenylalanine transmembrane transporter activity [GO:0015192]; L-prol…	endoplasmic reticulum membrane [GO:0005789]; endosome [GO:0005768]; ER to Golgi transport vesicle [GO:0030134]; fungal-type vacuole lumen [GO:0000328]; integral component of plasma membrane [GO:0005887]; multivesicular body [GO:0005771]; plasma membrane [GO:0005886]	amino acid transport [GO:0006865]; polyamine transport [GO:0015846]	amino acid transmembrane transporter activity [GO:0015171]; L-phenylalanine transmembrane transporter activity [GO:0015192]; L-proline transmembrane transporter activity [GO:0015193]; polyamine transmembrane transporter activity [GO:0015203]
GPT2	124.3491736	269.6842138	-1.116874155	0.000129455	0.002998214	P19145	GAP1_YEAST	General amino-acid permease GAP1	GPT2 GAT1 YKR067W	743	endoplasmic reticulum [GO:0005783]; integral component of endoplasmic reticulum membrane [GO:0030176]; lipid particle [GO:0005811]; glycerol-3-phosphate O-acyltransferase activity [GO:0004366]; glycerone-phosphate O-acyltransferase activity [GO:0016287]; CDP-diacylglycerol biosynthetic process [GO:0016024]; phospholipid biosynthetic process [GO:0008654]	endoplasmic reticulum [GO:0005783]; integral component of endoplasmic reticulum membrane [GO:0030176]; lipid particle [GO:0005811]	CDP-diacylglycerol biosynthetic process [GO:0016024]; phospholipid biosynthetic process [GO:0008654]	glycerol-3-phosphate O-acyltransferase activity [GO:0004366]; glycerone-phosphate O-acyltransferase activity [GO:0016287]
PTR2	23.65415154	97.10031864	-2.037382617	8.39E-05	0.002035656	P36148	GPT2_YEAST	Glycerol-3-phosphate O-acyltransferase 2 (G-3-P acyltransferase 2) (EC 2.3.1.15) (Dihydroxyacetone phosphate acyltransferase 2) (DHAP-AT 2) (EC 2.3.1.42) (Glycerol-3-phosphate / dihydroxyacetone phosphate acyltransferase 2)	PTR2 YKR093W YKR413	601	integral component of membrane [GO:0016021]; plasma membrane [GO:0005886]; dipeptide transporter activity [GO:0042936]; peptide transporter activity [GO:0015197]; tripeptide transporter activity [GO:0042937]; dipeptide transport [GO:0042938]; peptide transport [GO:0015833]; protein transport [GO:0015031]; tripeptide transport [GO:0042939]	integral component of membrane [GO:0016021]; plasma membrane [GO:0005886]	dipeptide transport [GO:0042938]; peptide transport [GO:0015833]; protein transport [GO:0015031]; tripeptide transport [GO:0042939]	dipeptide transporter activity [GO:0042936]; peptide transporter activity [GO:0015197]; tripeptide transporter activity [GO:0042937]
RPL40B	26.93760829	128.1406472	-2.250034513	9.97E-07	4.07E-05	P32901	PTR2_YEAST	Peptide transporter PTR2 (Peptide permease PTR2)	RPL40B UBI2 YKR094C	128	cytosolic large ribosomal subunit [GO:0022625]; nucleus [GO:0005634]; protein tag [GO:0031386]; structural constituent of ribosome [GO:0003735]; cytoplasmic translation [GO:0002181]; protein ubiquitination [GO:0016567]; ribosomal large subunit assembly [GO:0000027]; ribosomal large subunit export from nucleus [GO:0000055]; ribosome biogenesis [GO:0042254]	cytosolic large ribosomal subunit [GO:0022625]; nucleus [GO:0005634]	cytoplasmic translation [GO:0002181]; protein ubiquitination [GO:0016567]; ribosomal large subunit assembly [GO:0000027]; ribosomal large subunit export from nucleus [GO:0000055]; ribosome biogenesis [GO:0042254]	protein tag [GO:0031386]; structural constituent of ribosome [GO:0003735]
PCK1	867.3893504	2737.593058	-1.658156371	8.00E-22	3.54E-19	P0CH09	RL40B_YEAST	Ubiquitin-60S ribosomal protein L40 [Cleaved into: Ubiquitin; 60S ribosomal protein L40-B (CEP52) (Large ribosomal subunit protein eL40-B)]	PCK1 PEPC PPC1 YKR097W	549	cytosol [GO:0005829]; ATP binding [GO:0005524]; phosphoenolpyruvate carboxykinase (ATP) activity [GO:0004612]; gluconeogenesis [GO:0006094]	cytosol [GO:0005829]	gluconeogenesis [GO:0006094]	ATP binding [GO:0005524]; phosphoenolpyruvate carboxykinase (ATP) activity [GO:0004612]
UBP11	57.77070147	171.3744268	-1.568741923	1.89E-05	0.000540336	P10963	PCKA_YEAST	Phosphoenolpyruvate carboxykinase (ATP) (EC 4.1.1.49)	UBP11 YKR098C	717	thiol-dependent ubiquitin-specific protease activity [GO:0004843]; protein deubiquitination [GO:0016579]; ubiquitin-dependent protein catabolic process [GO:0006511]		protein deubiquitination [GO:0016579]; ubiquitin-dependent protein catabolic process [GO:0006511]	thiol-dependent ubiquitin-specific protease activity [GO:0004843]
UBI4	885.1129818	1265.928975	-0.516262937	0.003934905	0.04963057	P36026	UBP11_YEAST	Ubiquitin carboxyl-terminal hydrolase 11 (EC 3.4.19.12) (Deubiquitinating enzyme 11) (Ubiquitin thioesterase 11) (Ubiquitin-specific-processing protease 11)	UBI4 SCD2 YLL039C	381	cytoplasm [GO:0005737]; nucleus [GO:0005634]; ATP-dependent protein binding [GO:0043008]; protein tag [GO:0031386]; ascospore formation [GO:0030437]; protein deubiquitination [GO:0016579]; protein monoubiquitination [GO:0006513]; protein polyubiquitination [GO:0000209]; protein ubiquitination [GO:0016567]	cytoplasm [GO:0005737]; nucleus [GO:0005634]	ascospore formation [GO:0030437]; protein deubiquitination [GO:0016579]; protein monoubiquitination [GO:0006513]; protein polyubiquitination [GO:0000209]; protein ubiquitination [GO:0016567]	ATP-dependent protein binding [GO:0043008]; protein tag [GO:0031386]
TPO1	90.41078045	206.4247135	-1.19104899	0.000465194	0.009041367	P0CG63	UBI4P_YEAST	Polyubiquitin [Cleaved into: Ubiquitin]	TPO1 YLL028W L0939	586	cellular bud membrane [GO:0033101]; fungal-type vacuole membrane [GO:0000329]; integral component of membrane [GO:0016021]; plasma membrane [GO:0005886]; antiporter activity [GO:0015297]; spermidine transmembrane transporter activity [GO:0015606]; spermine transmembrane transporter activity [GO:0000297]; polyamine transmembrane transport [GO:1902047]; putrescine transport [GO:0015847]; spermidine…	cellular bud membrane [GO:0033101]; fungal-type vacuole membrane [GO:0000329]; integral component of membrane [GO:0016021]; plasma membrane [GO:0005886]	polyamine transmembrane transport [GO:1902047]; putrescine transport [GO:0015847]; spermidine transport [GO:0015848]; spermine transport [GO:0000296]	antiporter activity [GO:0015297]; spermidine transmembrane transporter activity [GO:0015606]; spermine transmembrane transporter activity [GO:0000297]
YLR001C	102.7045298	220.4328173	-1.10183921	0.00081061	0.014292102	Q07824	TPO1_YEAST	Polyamine transporter 1	YLR001C L1388	862	extracellular space [GO:0005615]; integral component of membrane [GO:0016021]; vacuolar membrane [GO:0005774]; macroautophagy [GO:0016236]	extracellular space [GO:0005615]; integral component of membrane [GO:0016021]; vacuolar membrane [GO:0005774]	macroautophagy [GO:0016236]
THI73	194.1222953	375.5021132	-0.951855203	0.000235021	0.004975103	Q07895	YL001_YEAST	FAS1 domain-containing protein YLR001C	THI73 YLR004C	523	endoplasmic reticulum [GO:0005783]; endoplasmic reticulum membrane [GO:0005789]; integral component of membrane [GO:0016021]; plasma membrane [GO:0005886]; transporter activity [GO:0005215]; transmembrane transport [GO:0055085]; transport [GO:0006810]	endoplasmic reticulum [GO:0005783]; endoplasmic reticulum membrane [GO:0005789]; integral component of membrane [GO:0016021]; plasma membrane [GO:0005886]	transmembrane transport [GO:0055085]; transport [GO:0006810]	transporter activity [GO:0005215]
NSE1	32.54653827	101.1435885	-1.635828863	0.001132314	0.018769311	Q07904	THI73_YEAST	Thiamine pathway transporter THI73	NSE1 YLR007W	336	nucleus [GO:0005634]; Smc5-Smc6 complex [GO:0030915]; metal ion binding [GO:0046872]; ubiquitin-protein transferase activity [GO:0004842]; DNA repair [GO:0006281]; double-strand break repair via homologous recombination [GO:0000724]; postreplication repair [GO:0006301]; protein sumoylation [GO:0016925]; protein ubiquitination [GO:0016567]	nucleus [GO:0005634]; Smc5-Smc6 complex [GO:0030915]	DNA repair [GO:0006281]; double-strand break repair via homologous recombination [GO:0000724]; postreplication repair [GO:0006301]; protein sumoylation [GO:0016925]; protein ubiquitination [GO:0016567]	metal ion binding [GO:0046872]; ubiquitin-protein transferase activity [GO:0004842]
AAT2	554.2497605	902.1076083	-0.702763295	0.00057863	0.010803802	Q07913	NSE1_YEAST	Non-structural maintenance of chromosomes element 1 (Non-SMC element 1)	AAT2 ASP5 YLR027C L1746	418	cytosol [GO:0005829]; peroxisome [GO:0005777]; L-aspartate:2-oxoglutarate aminotransferase activity [GO:0004069]; L-phenylalanine:2-oxoglutarate aminotransferase activity [GO:0080130]; pyridoxal phosphate binding [GO:0030170]; 2-oxoglutarate metabolic process [GO:0006103]; asparagine biosynthetic process from oxaloacetate [GO:0019266]; aspartate biosynthetic process [GO:0006532]; aspartate metabo…	cytosol [GO:0005829]; peroxisome [GO:0005777]	2-oxoglutarate metabolic process [GO:0006103]; asparagine biosynthetic process from oxaloacetate [GO:0019266]; aspartate biosynthetic process [GO:0006532]; aspartate metabolic process [GO:0006531]; glutamate metabolic process [GO:0006536]	L-aspartate:2-oxoglutarate aminotransferase activity [GO:0004069]; L-phenylalanine:2-oxoglutarate aminotransferase activity [GO:0080130]; pyridoxal phosphate binding [GO:0030170]
TRX1	337.3656927	588.0018257	-0.801507363	0.000599614	0.011164244	P22217	TRX1_YEAST	Thioredoxin-1 (Thioredoxin I) (TR-I) (Thioredoxin-2)	TRX2 TRX1 YGR209C G7746	104	cytosol [GO:0005829]; fungal-type vacuole [GO:0000324]; Golgi membrane [GO:0000139]; nucleus [GO:0005634]; disulfide oxidoreductase activity [GO:0015036]; oxidoreductase activity, acting on a sulfur group of donors, disulfide as acceptor [GO:0016671]; protein disulfide oxidoreductase activity [GO:0015035]; protein-disulfide reductase activity [GO:0047134]; thioredoxin-disulfide reductase activity…	cytosol [GO:0005829]; fungal-type vacuole [GO:0000324]; Golgi membrane [GO:0000139]; nucleus [GO:0005634]	cell redox homeostasis [GO:0045454]; cellular response to oxidative stress [GO:0034599]; deoxyribonucleotide biosynthetic process [GO:0009263]; ER to Golgi vesicle-mediated transport [GO:0006888]; glutathione metabolic process [GO:0006749]; glycerol ether metabolic process [GO:0006662]; protein deglutathionylation [GO:0080058]; protein transport [GO:0015031]; retrograde vesicle-mediated transport…	disulfide oxidoreductase activity [GO:0015036]; oxidoreductase activity, acting on a sulfur group of donors, disulfide as acceptor [GO:0016671]; protein disulfide oxidoreductase activity [GO:0015035]; protein-disulfide reductase activity [GO:0047134]; thioredoxin-disulfide reductase activity [GO:0004791]
ERG3	94.53315247	195.3461688	-1.04714069	0.002708413	0.036966774	P22803	TRX2_YEAST	Thioredoxin-2 (Thioredoxin II) (TR-II) (Thioredoxin-1)	ERG3 PSO6 SYR1 YLR056W L2150	365	endoplasmic reticulum lumen [GO:0005788]; endoplasmic reticulum membrane [GO:0005789]; integral component of membrane [GO:0016021]; C-5 sterol desaturase activity [GO:0000248]; iron ion binding [GO:0005506]; ergosterol biosynthetic process [GO:0006696]	endoplasmic reticulum lumen [GO:0005788]; endoplasmic reticulum membrane [GO:0005789]; integral component of membrane [GO:0016021]	ergosterol biosynthetic process [GO:0006696]	C-5 sterol desaturase activity [GO:0000248]; iron ion binding [GO:0005506]
RFU1	0	27.34738182	#NAME?	0.002227592	0.032400009	P32353	ERG3_YEAST	Delta(7)-sterol 5(6)-desaturase (EC 1.14.19.20) (C-5 sterol desaturase) (Ergosterol Delta(5,6) desaturase) (Sterol-C5-desaturase)	RFU1 YLR073C	200	endosome [GO:0005768]; cysteine-type endopeptidase inhibitor activity [GO:0004869]; enzyme inhibitor activity [GO:0004857]; regulation of ubiquitin homeostasis [GO:0010993]	endosome [GO:0005768]	regulation of ubiquitin homeostasis [GO:0010993]	cysteine-type endopeptidase inhibitor activity [GO:0004869]; enzyme inhibitor activity [GO:0004857]
PCD1	37.35546749	114.965241	-1.621806416	0.000370521	0.007463185	Q08003	RFU1_YEAST	Regulator of free ubiquitin chains 1	PCD1 YLR151C L9634.8	340	peroxisome [GO:0005777]; 8-oxo-7,8-dihydroguanosine triphosphate pyrophosphatase activity [GO:0008413]; magnesium ion binding [GO:0000287]; manganese ion binding [GO:0030145]; pyrophosphatase activity [GO:0016462]; coenzyme A metabolic process [GO:0015936]; DNA repair [GO:0006281]; nucleoside diphosphate metabolic process [GO:0009132]	peroxisome [GO:0005777]	coenzyme A metabolic process [GO:0015936]; DNA repair [GO:0006281]; nucleoside diphosphate metabolic process [GO:0009132]	8-oxo-7,8-dihydroguanosine triphosphate pyrophosphatase activity [GO:0008413]; magnesium ion binding [GO:0000287]; manganese ion binding [GO:0030145]; pyrophosphatase activity [GO:0016462]
YLR152C	45.10636042	114.0079471	-1.337731607	0.0027668	0.037448157	Q12524	PCD1_YEAST	Peroxisomal coenzyme A diphosphatase 1, peroxisomal (EC 3.6.1.55)	YLR152C L9634.9	576	integral component of membrane [GO:0016021]; transmembrane transport [GO:0055085]	integral component of membrane [GO:0016021]	transmembrane transport [GO:0055085]
ACS2	196.8682529	365.7618107	-0.893673971	0.000680479	0.012257843	P54072	YL152_YEAST	Uncharacterized transporter YLR152C	ACS2 YLR153C L9634.10	683	cytosol [GO:0005829]; nucleolus [GO:0005730]; nucleus [GO:0005634]; acetate-CoA ligase activity [GO:0003987]; acid-ammonia (or amide) ligase activity [GO:0016880]; AMP binding [GO:0016208]; ATP binding [GO:0005524]; acetyl-CoA biosynthetic process [GO:0006085]; acetyl-CoA biosynthetic process from acetate [GO:0019427]; histone acetylation [GO:0016573]; pyruvate metabolic process [GO:0006090]; rep…	cytosol [GO:0005829]; nucleolus [GO:0005730]; nucleus [GO:0005634]	acetyl-CoA biosynthetic process [GO:0006085]; acetyl-CoA biosynthetic process from acetate [GO:0019427]; histone acetylation [GO:0016573]; pyruvate metabolic process [GO:0006090]; replicative cell aging [GO:0001302]	acetate-CoA ligase activity [GO:0003987]; acid-ammonia (or amide) ligase activity [GO:0016880]; AMP binding [GO:0016208]; ATP binding [GO:0005524]
SHH4	36.68345962	156.3450923	-2.091532323	1.04E-07	5.15E-06	P52910	ACS2_YEAST	Acetyl-coenzyme A synthetase 2 (EC 6.2.1.1) (Acetate--CoA ligase 2) (Acyl-activating enzyme 2)	SHH4 YLR164W	168	integral component of membrane [GO:0016021]; mitochondrial inner membrane [GO:0005743]; mitochondrial respiratory chain complex II, succinate dehydrogenase complex (ubiquinone) [GO:0005749]; heme binding [GO:0020037]; metal ion binding [GO:0046872]; ubiquinone binding [GO:0048039]; mitochondrial electron transport, succinate to ubiquinone [GO:0006121]; tricarboxylic acid cycle [GO:0006099]	integral component of membrane [GO:0016021]; mitochondrial inner membrane [GO:0005743]; mitochondrial respiratory chain complex II, succinate dehydrogenase complex (ubiquinone) [GO:0005749]	mitochondrial electron transport, succinate to ubiquinone [GO:0006121]; tricarboxylic acid cycle [GO:0006099]	heme binding [GO:0020037]; metal ion binding [GO:0046872]; ubiquinone binding [GO:0048039]
IDP2	172.9860519	679.1121706	-1.972994171	1.99E-18	4.90E-16	Q06236	SHH4_YEAST	Mitochondrial inner membrane protein SHH4 (SDH4 homolog)	IDP2 YLR174W L9470.12	412	cytosol [GO:0005829]; isocitrate dehydrogenase (NADP+) activity [GO:0004450]; magnesium ion binding [GO:0000287]; NAD binding [GO:0051287]; glyoxylate cycle [GO:0006097]; isocitrate metabolic process [GO:0006102]; tricarboxylic acid cycle [GO:0006099]	cytosol [GO:0005829]	glyoxylate cycle [GO:0006097]; isocitrate metabolic process [GO:0006102]; tricarboxylic acid cycle [GO:0006099]	isocitrate dehydrogenase (NADP+) activity [GO:0004450]; magnesium ion binding [GO:0000287]; NAD binding [GO:0051287]
YKE2	61.69617623	137.0860367	-1.151828646	0.003087486	0.040638656	P41939	IDHC_YEAST	Isocitrate dehydrogenase [NADP] cytoplasmic (IDH) (EC 1.1.1.42) (IDP) (NADP(+)-specific ICDH) (Oxalosuccinate decarboxylase)	YKE2 GIM1 PFD6 YLR200W L8167.8	114	cytoplasm [GO:0005737]; cytosol [GO:0005829]; nucleus [GO:0005634]; prefoldin complex [GO:0016272]; chaperone binding [GO:0051087]; tubulin binding [GO:0015631]; unfolded protein binding [GO:0051082]; chaperone-mediated protein complex assembly [GO:0051131]; cortical microtubule organization [GO:0043622]; positive regulation of transcription elongation from RNA polymerase II promoter [GO:0032968]…	cytoplasm [GO:0005737]; cytosol [GO:0005829]; nucleus [GO:0005634]; prefoldin complex [GO:0016272]	chaperone-mediated protein complex assembly [GO:0051131]; cortical microtubule organization [GO:0043622]; positive regulation of transcription elongation from RNA polymerase II promoter [GO:0032968]; protein folding [GO:0006457]; tubulin complex assembly [GO:0007021]	chaperone binding [GO:0051087]; tubulin binding [GO:0015631]; unfolded protein binding [GO:0051082]
ECI1	165.8961887	476.2968696	-1.521580325	1.31E-10	1.07E-08	P52553	PFD6_YEAST	Prefoldin subunit 6 (Genes involved in microtubule biogenesis protein 1) (Gim complex subunit 1) (GimC subunit 1)	ECI1 YLR284C	280	peroxisome [GO:0005777]; dodecenoyl-CoA delta-isomerase activity [GO:0004165]; fatty acid beta-oxidation [GO:0006635]	peroxisome [GO:0005777]	fatty acid beta-oxidation [GO:0006635]	dodecenoyl-CoA delta-isomerase activity [GO:0004165]
ACO1	517.435092	853.3296402	-0.721725261	0.000628792	0.011545806	Q05871	ECI1_YEAST	3,2-trans-enoyl-CoA isomerase (EC 5.3.3.8) (Delta(3),Delta(2)-enoyl-CoA isomerase) (D3,D2-enoyl-CoA isomerase) (Dodecenoyl-CoA isomerase)	ACO1 GLU1 YLR304C L8003.22	778	cytosol [GO:0005829]; mitochondrial intermembrane space [GO:0005758]; mitochondrial matrix [GO:0005759]; mitochondrial nucleoid [GO:0042645]; 4 iron, 4 sulfur cluster binding [GO:0051539]; aconitate hydratase activity [GO:0003994]; double-stranded DNA binding [GO:0003690]; metal ion binding [GO:0046872]; single-stranded DNA binding [GO:0003697]; mitochondrial genome maintenance [GO:0000002]; prot…	cytosol [GO:0005829]; mitochondrial intermembrane space [GO:0005758]; mitochondrial matrix [GO:0005759]; mitochondrial nucleoid [GO:0042645]	mitochondrial genome maintenance [GO:0000002]; protein targeting to mitochondrion [GO:0006626]; tricarboxylic acid cycle [GO:0006099]	4 iron, 4 sulfur cluster binding [GO:0051539]; aconitate hydratase activity [GO:0003994]; double-stranded DNA binding [GO:0003690]; metal ion binding [GO:0046872]; single-stranded DNA binding [GO:0003697]
CDA1	40.09044693	168.1852383	-2.068720679	1.34E-07	6.39E-06	P19414	ACON_YEAST	Aconitate hydratase, mitochondrial (Aconitase) (EC 4.2.1.3) (Citrate hydro-lyase)	CDA1 YLR307W L2142.2	301	chitosan layer of spore wall [GO:0005631]; chitin deacetylase activity [GO:0004099]; ascospore wall assembly [GO:0030476]; chitin catabolic process [GO:0006032]; polysaccharide catabolic process [GO:0000272]	chitosan layer of spore wall [GO:0005631]	ascospore wall assembly [GO:0030476]; chitin catabolic process [GO:0006032]; polysaccharide catabolic process [GO:0000272]	chitin deacetylase activity [GO:0004099]
YLR307C-A	1409.335003	5596.444613	-1.989495997	6.45E-40	2.14E-36	Q06702	CDA1_YEAST	Chitin deacetylase 1 (EC 3.5.1.41)	YLR307C-A	87
YLR311C	75.37196464	228.0384736	-1.597177346	2.10E-06	7.79E-05	Q3E825	YL307_YEAST	Uncharacterized protein YLR307C-A	YLR311C L8543.10	115	integral component of membrane [GO:0016021]	integral component of membrane [GO:0016021]
YLR312C	189.0363151	483.1757274	-1.35388457	7.26E-09	4.47E-07	Q06158	YL311_YEAST	Putative uncharacterized membrane protein YLR311C	ATG39 YLR312C	398	endoplasmic reticulum membrane [GO:0005789]; integral component of membrane [GO:0016021]; perinuclear endoplasmic reticulum [GO:0097038]; pre-autophagosomal structure membrane [GO:0034045]; protein binding, bridging [GO:0030674]; cellular response to nitrogen starvation [GO:0006995]; nucleophagy [GO:0044804]; reticulophagy [GO:0061709]	endoplasmic reticulum membrane [GO:0005789]; integral component of membrane [GO:0016021]; perinuclear endoplasmic reticulum [GO:0097038]; pre-autophagosomal structure membrane [GO:0034045]	cellular response to nitrogen starvation [GO:0006995]; nucleophagy [GO:0044804]; reticulophagy [GO:0061709]	protein binding, bridging [GO:0030674]
ILV5	326.7663768	538.1515043	-0.719752845	0.00253901	0.035381127	Q06159	ATG39_YEAST	Autophagy-related protein 39	ILV5 YLR355C L9638.7	395	mitochondrial nucleoid [GO:0042645]; mitochondrion [GO:0005739]; double-stranded DNA binding [GO:0003690]; ketol-acid reductoisomerase activity [GO:0004455]; metal ion binding [GO:0046872]; branched-chain amino acid biosynthetic process [GO:0009082]; isoleucine biosynthetic process [GO:0009097]; mitochondrial genome maintenance [GO:0000002]; valine biosynthetic process [GO:0009099]	mitochondrial nucleoid [GO:0042645]; mitochondrion [GO:0005739]	branched-chain amino acid biosynthetic process [GO:0009082]; isoleucine biosynthetic process [GO:0009097]; mitochondrial genome maintenance [GO:0000002]; valine biosynthetic process [GO:0009099]	double-stranded DNA binding [GO:0003690]; ketol-acid reductoisomerase activity [GO:0004455]; metal ion binding [GO:0046872]
FBP1	269.6032412	1007.957624	-1.902525241	1.29E-20	4.76E-18	P06168	ILV5_YEAST	Ketol-acid reductoisomerase, mitochondrial (EC 1.1.1.86) (Acetohydroxy-acid reductoisomerase) (Alpha-keto-beta-hydroxylacyl reductoisomerase)	FBP1 YLR377C L8039.18	348	cytosol [GO:0005829]; periplasmic space [GO:0042597]; fructose 1,6-bisphosphate 1-phosphatase activity [GO:0042132]; metal ion binding [GO:0046872]; fructose 1,6-bisphosphate metabolic process [GO:0030388]; fructose 6-phosphate metabolic process [GO:0006002]; fructose metabolic process [GO:0006000]; gluconeogenesis [GO:0006094]; reactive oxygen species metabolic process [GO:0072593]; sucrose bios…	cytosol [GO:0005829]; periplasmic space [GO:0042597]	fructose 1,6-bisphosphate metabolic process [GO:0030388]; fructose 6-phosphate metabolic process [GO:0006002]; fructose metabolic process [GO:0006000]; gluconeogenesis [GO:0006094]; reactive oxygen species metabolic process [GO:0072593]; sucrose biosynthetic process [GO:0005986]	fructose 1,6-bisphosphate 1-phosphatase activity [GO:0042132]; metal ion binding [GO:0046872]
BLS1	0	43.07467609	#NAME?	0.000690599	0.012373085	P09201	F16P_YEAST	Fructose-1,6-bisphosphatase (FBPase) (EC 3.1.3.11) (D-fructose-1,6-bisphosphate 1-phosphohydrolase)	BLS1 YLR408C	122	BLOC-1 complex [GO:0031083]; endosome [GO:0005768]; endosome organization [GO:0007032]; regulation of protein localization [GO:0032880]; transport [GO:0006810]	BLOC-1 complex [GO:0031083]; endosome [GO:0005768]	endosome organization [GO:0007032]; regulation of protein localization [GO:0032880]; transport [GO:0006810]
HMG2	112.2089447	222.2141582	-0.985763055	0.002144813	0.031507751	Q06071	BL1S1_YEAST	Biogenesis of lysosome-related organelles complex 1 subunit BLS1 (BLOC-1 subunit BLS1) (BLOS1-homolog)	HMG2 YLR450W L9324.2	1045	endoplasmic reticulum membrane [GO:0005789]; integral component of membrane [GO:0016021]; nuclear envelope [GO:0005635]; peroxisomal membrane [GO:0005778]; proteasome complex [GO:0000502]; hydroxymethylglutaryl-CoA reductase (NADPH) activity [GO:0004420]; NADP binding [GO:0050661]; coenzyme A metabolic process [GO:0015936]; ergosterol biosynthetic process [GO:0006696]; isoprenoid biosynthetic pro…	endoplasmic reticulum membrane [GO:0005789]; integral component of membrane [GO:0016021]; nuclear envelope [GO:0005635]; peroxisomal membrane [GO:0005778]; proteasome complex [GO:0000502]	coenzyme A metabolic process [GO:0015936]; ergosterol biosynthetic process [GO:0006696]; isoprenoid biosynthetic process [GO:0008299]	hydroxymethylglutaryl-CoA reductase (NADPH) activity [GO:0004420]; NADP binding [GO:0050661]
YRF1-4	98.14266172	232.9102636	-1.246821911	9.15E-05	0.002202453	P12684	HMDH2_YEAST	3-hydroxy-3-methylglutaryl-coenzyme A reductase 2 (HMG-CoA reductase 2) (EC 1.1.1.34)	YRF1-4 YLR466W	1382	nucleus [GO:0005634]; ATP binding [GO:0005524]; DNA helicase activity [GO:0003678]; nucleic acid binding [GO:0003676]; telomere maintenance via recombination [GO:0000722]	nucleus [GO:0005634]	telomere maintenance via recombination [GO:0000722]	ATP binding [GO:0005524]; DNA helicase activity [GO:0003678]; nucleic acid binding [GO:0003676]
YRF1-5	107.3210241	228.8699757	-1.092595489	0.000555012	0.010480575	O13559	YRF14_YEAST	Y' element ATP-dependent helicase protein 1 copy 4 (EC 3.6.4.12)	YRF1-5 YLR467W L9040	1796	nucleus [GO:0005634]; ATP binding [GO:0005524]; DNA helicase activity [GO:0003678]; nucleic acid binding [GO:0003676]; telomere maintenance via recombination [GO:0000722]	nucleus [GO:0005634]	telomere maintenance via recombination [GO:0000722]	ATP binding [GO:0005524]; DNA helicase activity [GO:0003678]; nucleic acid binding [GO:0003676]
YML133C	89.1222821	192.8290834	-1.113464581	0.00151016	0.023900087	P0CX21	YRF15_YEAST	Y' element ATP-dependent helicase protein 1 copy 5 (EC 3.6.4.12)	YML133C YM4987.01C YM4987.02C	1374	ATP binding [GO:0005524]; helicase activity [GO:0004386]; nucleic acid binding [GO:0003676]			ATP binding [GO:0005524]; helicase activity [GO:0004386]; nucleic acid binding [GO:0003676]
MSC1	752.163913	1385.160821	-0.880934491	6.87E-08	3.60E-06	Q03099	YMN3_YEAST	Y' element ATP-dependent helicase YML133C (EC 3.6.4.12)	MSC1 YML128C YM4987.07C	513	mitochondrion [GO:0005739]; reciprocal meiotic recombination [GO:0007131]	mitochondrion [GO:0005739]	reciprocal meiotic recombination [GO:0007131]
ERG13	91.97070511	193.0551057	-1.069766404	0.002373743	0.033643027	Q03104	MSC1_YEAST	Meiotic sister chromatid recombination protein 1	ERG13 HMGS YML126C YM4987.09C	491	hydroxymethylglutaryl-CoA synthase activity [GO:0004421]; ergosterol biosynthetic process [GO:0006696]; isoprenoid biosynthetic process [GO:0008299]		ergosterol biosynthetic process [GO:0006696]; isoprenoid biosynthetic process [GO:0008299]	hydroxymethylglutaryl-CoA synthase activity [GO:0004421]
HMG1	66.71655204	146.7975005	-1.137710767	0.003517278	0.045308817	P54839	HMCS_YEAST	Hydroxymethylglutaryl-CoA synthase (HMG-CoA synthase) (EC 2.3.3.10) (3-hydroxy-3-methylglutaryl coenzyme A synthase)	HMG1 YML075C	1054	endoplasmic reticulum membrane [GO:0005789]; integral component of membrane [GO:0016021]; nuclear envelope [GO:0005635]; peroxisomal membrane [GO:0005778]; hydroxymethylglutaryl-CoA reductase (NADPH) activity [GO:0004420]; NADP binding [GO:0050661]; coenzyme A metabolic process [GO:0015936]; ergosterol biosynthetic process [GO:0006696]; isopentenyl diphosphate biosynthetic process, mevalonate pat…	endoplasmic reticulum membrane [GO:0005789]; integral component of membrane [GO:0016021]; nuclear envelope [GO:0005635]; peroxisomal membrane [GO:0005778]	coenzyme A metabolic process [GO:0015936]; ergosterol biosynthetic process [GO:0006696]; isopentenyl diphosphate biosynthetic process, mevalonate pathway [GO:0019287]; isoprenoid biosynthetic process [GO:0008299]	hydroxymethylglutaryl-CoA reductase (NADPH) activity [GO:0004420]; NADP binding [GO:0050661]
CAT2	320.1549241	1036.589748	-1.695002926	1.07E-17	2.36E-15	P12683	HMDH1_YEAST	3-hydroxy-3-methylglutaryl-coenzyme A reductase 1 (HMG-CoA reductase 1) (EC 1.1.1.34)	CAT2 CAT YCAT YML042W YM8054.01	670	mitochondrial inner membrane [GO:0005743]; mitochondrion [GO:0005739]; peroxisome [GO:0005777]; carnitine O-acetyltransferase activity [GO:0004092]; carnitine metabolic process [GO:0009437]; fatty acid metabolic process [GO:0006631]; transport [GO:0006810]	mitochondrial inner membrane [GO:0005743]; mitochondrion [GO:0005739]; peroxisome [GO:0005777]	carnitine metabolic process [GO:0009437]; fatty acid metabolic process [GO:0006631]; transport [GO:0006810]	carnitine O-acetyltransferase activity [GO:0004092]
TRM12	46.70636194	117.3458023	-1.329075254	0.002041715	0.030360802	P32796	CACP_YEAST	Carnitine O-acetyltransferase, mitochondrial (Carnitine acetylase) (EC 2.3.1.7)	TRM12 TYW2 YML005W YM9571.14	462	cytoplasm [GO:0005737]; S-adenosylmethionine-dependent methyltransferase activity [GO:0008757]; transferase activity, transferring alkyl or aryl (other than methyl) groups [GO:0016765]; tRNA 4-demethylwyosine alpha-amino-alpha-carboxypropyltransferase activity [GO:0102522]; tRNA methylation [GO:0030488]; tRNA modification [GO:0006400]; wybutosine biosynthetic process [GO:0031591]	cytoplasm [GO:0005737]	tRNA methylation [GO:0030488]; tRNA modification [GO:0006400]; wybutosine biosynthetic process [GO:0031591]	S-adenosylmethionine-dependent methyltransferase activity [GO:0008757]; transferase activity, transferring alkyl or aryl (other than methyl) groups [GO:0016765]; tRNA 4-demethylwyosine alpha-amino-alpha-carboxypropyltransferase activity [GO:0102522]
AAC1	108.2044786	256.1537161	-1.243249608	3.71E-05	0.000991354	Q04235	TYW2_YEAST	tRNA wybutosine-synthesizing protein 2 (tRNA-yW-synthesizing protein 2) (EC 2.5.1.114) (tRNA(Phe) (4-demethylwyosine(37)-C(7)) aminocarboxypropyltransferase)	AAC1 YMR056C YM9796.09C	309	cytosol [GO:0005829]; integral component of membrane [GO:0016021]; mitochondrial inner membrane [GO:0005743]; mitochondrial intermembrane space [GO:0005758]; ATP:ADP antiporter activity [GO:0005471]; aerobic respiration [GO:0009060]; heme biosynthetic process [GO:0006783]; heme transport [GO:0015886]; mitochondrial transport [GO:0006839]; protein targeting to mitochondrion [GO:0006626]; regulatio…	cytosol [GO:0005829]; integral component of membrane [GO:0016021]; mitochondrial inner membrane [GO:0005743]; mitochondrial intermembrane space [GO:0005758]	aerobic respiration [GO:0009060]; heme biosynthetic process [GO:0006783]; heme transport [GO:0015886]; mitochondrial transport [GO:0006839]; protein targeting to mitochondrion [GO:0006626]; regulation of mitochondrial membrane permeability [GO:0046902]	ATP:ADP antiporter activity [GO:0005471]
SEN15	0	39.86112183	#NAME?	7.73E-05	0.001896175	P04710	ADT1_YEAST	ADP,ATP carrier protein 1 (ADP/ATP translocase 1) (Adenine nucleotide translocator 1) (ANT 1)	SEN15 YMR059W YM9796.12	128	endomembrane system [GO:0012505]; mitochondrial outer membrane [GO:0005741]; tRNA-intron endonuclease complex [GO:0000214]; tRNA-intron endonuclease activity [GO:0000213]; tRNA-type intron splice site recognition and cleavage [GO:0000379]	endomembrane system [GO:0012505]; mitochondrial outer membrane [GO:0005741]; tRNA-intron endonuclease complex [GO:0000214]	tRNA-type intron splice site recognition and cleavage [GO:0000379]	tRNA-intron endonuclease activity [GO:0000213]
PDS5	0	64.59595608	#NAME?	0.002607756	0.035962146	Q04675	SEN15_YEAST	tRNA-splicing endonuclease subunit SEN15 (Splicing endonuclease of 15 kDa) (tRNA-intron endonuclease SEN15)	PDS5 YMR076C YM9582.01C YM9916.15C	1277	chromatin [GO:0000785]; condensed nuclear chromosome [GO:0000794]; cytosol [GO:0005829]; nucleus [GO:0005634]; structural molecule activity [GO:0005198]; cell division [GO:0051301]; double-strand break repair [GO:0006302]; meiotic cell cycle [GO:0051321]; mitotic chromosome condensation [GO:0007076]; mitotic sister chromatid cohesion [GO:0007064]; synapsis [GO:0007129]	chromatin [GO:0000785]; condensed nuclear chromosome [GO:0000794]; cytosol [GO:0005829]; nucleus [GO:0005634]	cell division [GO:0051301]; double-strand break repair [GO:0006302]; meiotic cell cycle [GO:0051321]; mitotic chromosome condensation [GO:0007076]; mitotic sister chromatid cohesion [GO:0007064]; synapsis [GO:0007129]	structural molecule activity [GO:0005198]
MTG1	94.73567441	203.4312176	-1.10256138	0.001209467	0.019917703	Q04264	PDS5_YEAST	Sister chromatid cohesion protein PDS5 (Precocious dissociation of sisters protein 5)	MTG1 YMR097C YM6543.04C	367	mitochondrial inner membrane [GO:0005743]; GTP binding [GO:0005525]; GTPase activity [GO:0003924]; mitochondrial translation [GO:0032543]; ribosome biogenesis [GO:0042254]	mitochondrial inner membrane [GO:0005743]	mitochondrial translation [GO:0032543]; ribosome biogenesis [GO:0042254]	GTPase activity [GO:0003924]; GTP binding [GO:0005525]
SPG4	1318.607366	2515.360712	-0.931750257	4.03E-07	1.80E-05	Q03151	MTG1_YEAST	Mitochondrial GTPase 1	SPG4 YMR107W YM9718.06	115
SHH3	147.0064271	482.9830167	-1.716093229	6.88E-13	7.62E-11	Q04438	SPG4_YEAST	Stationary phase protein 4	SHH3 YMR118C YM9718.17C	196	integral component of membrane [GO:0016021]; mitochondrial respiratory chain complex II, succinate dehydrogenase complex (ubiquinone) [GO:0005749]; electron carrier activity [GO:0009055]; metal ion binding [GO:0046872]; quinone binding [GO:0048038]; succinate dehydrogenase activity [GO:0000104]; mitochondrial electron transport, succinate to ubiquinone [GO:0006121]; tricarboxylic acid cycle [GO:0…	integral component of membrane [GO:0016021]; mitochondrial respiratory chain complex II, succinate dehydrogenase complex (ubiquinone) [GO:0005749]	mitochondrial electron transport, succinate to ubiquinone [GO:0006121]; tricarboxylic acid cycle [GO:0006099]	electron carrier activity [GO:0009055]; metal ion binding [GO:0046872]; quinone binding [GO:0048038]; succinate dehydrogenase activity [GO:0000104]
PAI3	504.3944506	1308.098675	-1.374847065	6.31E-17	1.23E-14	Q04487	SHH3_YEAST	Mitochondrial inner membrane protein SHH3 (SDH3 homolog)	PAI3 YMR174C YM8010.04C	68	protein complex [GO:0043234]; vacuole [GO:0005773]; aspartic-type endopeptidase inhibitor activity [GO:0019828]; endopeptidase inhibitor activity [GO:0004866]; protease binding [GO:0002020]; negative regulation of endopeptidase activity [GO:0010951]; protein catabolic process in the vacuole [GO:0007039]	protein complex [GO:0043234]; vacuole [GO:0005773]	negative regulation of endopeptidase activity [GO:0010951]; protein catabolic process in the vacuole [GO:0007039]	aspartic-type endopeptidase inhibitor activity [GO:0019828]; endopeptidase inhibitor activity [GO:0004866]; protease binding [GO:0002020]
SPG5	401.7332976	745.6833738	-0.892325131	7.37E-05	0.001820958	P01094	IPA3_YEAST	Protease A inhibitor 3 (Proteinase inhibitor I(A)3) (Proteinase yscA-inhibitor) (Saccharopepsin inhibitor)	SPG5 YMR191W YM9646.03	373	proteasome binding [GO:0070628]; proteasome assembly [GO:0043248]		proteasome assembly [GO:0043248]	proteasome binding [GO:0070628]
EFR3	0	58.13434026	#NAME?	0.001352164	0.021868216	P42933	SPG5_YEAST	Stationary phase protein 5	EFR3 YMR212C YM8261.06C	782	plasma membrane [GO:0005886]; establishment of protein localization to plasma membrane [GO:0090002]	plasma membrane [GO:0005886]	establishment of protein localization to plasma membrane [GO:0090002]
FAA4	292.444005	561.9061699	-0.942168827	4.65E-05	0.001206161	Q03653	EFR3_YEAST	Protein EFR3	FAA4 YMR246W YM9408.08	694	cytoplasmic stress granule [GO:0010494]; lipid particle [GO:0005811]; plasma membrane [GO:0005886]; ATP binding [GO:0005524]; decanoate--CoA ligase activity [GO:0102391]; long-chain fatty acid-CoA ligase activity [GO:0004467]; long-chain fatty acid import [GO:0044539]; long-chain fatty-acyl-CoA metabolic process [GO:0035336]; sphingoid long-chain base transport [GO:1905329]	cytoplasmic stress granule [GO:0010494]; lipid particle [GO:0005811]; plasma membrane [GO:0005886]	long-chain fatty acid import [GO:0044539]; long-chain fatty-acyl-CoA metabolic process [GO:0035336]; sphingoid long-chain base transport [GO:1905329]	ATP binding [GO:0005524]; decanoate--CoA ligase activity [GO:0102391]; long-chain fatty acid-CoA ligase activity [GO:0004467]
ADH2	1181.913924	4261.165949	-1.850123266	3.38E-29	5.62E-26	P47912	LCF4_YEAST	Long-chain-fatty-acid--CoA ligase 4 (EC 6.2.1.3) (Fatty acid activator 4) (Long-chain acyl-CoA synthetase 4)	ADH2 ADR2 YMR303C YM9952.05C	348	cytoplasm [GO:0005737]; alcohol dehydrogenase (NAD) activity [GO:0004022]; zinc ion binding [GO:0008270]; amino acid catabolic process to alcohol via Ehrlich pathway [GO:0000947]; ethanol metabolic process [GO:0006067]; NADH oxidation [GO:0006116]	cytoplasm [GO:0005737]	amino acid catabolic process to alcohol via Ehrlich pathway [GO:0000947]; ethanol metabolic process [GO:0006067]; NADH oxidation [GO:0006116]	alcohol dehydrogenase (NAD) activity [GO:0004022]; zinc ion binding [GO:0008270]
UBP15	131.1230714	241.9588656	-0.883840249	0.003766888	0.047692394	P00331	ADH2_YEAST	Alcohol dehydrogenase 2 (EC 1.1.1.1) (Alcohol dehydrogenase II) (YADH-2)	UBP15 YMR304W YM9952.06	1230	cytosol [GO:0005829]; peroxisome [GO:0005777]; thiol-dependent ubiquitin-specific protease activity [GO:0004843]; free ubiquitin chain depolymerization [GO:0010995]; protein deubiquitination [GO:0016579]; ubiquitin-dependent protein catabolic process [GO:0006511]	cytosol [GO:0005829]; peroxisome [GO:0005777]	free ubiquitin chain depolymerization [GO:0010995]; protein deubiquitination [GO:0016579]; ubiquitin-dependent protein catabolic process [GO:0006511]	thiol-dependent ubiquitin-specific protease activity [GO:0004843]
ALP1	48.75032186	170.0742647	-1.802681203	2.21E-06	8.16E-05	P50101	UBP15_YEAST	Ubiquitin carboxyl-terminal hydrolase 15 (EC 3.4.19.12) (Deubiquitinating enzyme 15) (Ubiquitin thioesterase 15) (Ubiquitin-specific-processing protease 15)	ALP1 YNL270C N0660	573	integral component of membrane [GO:0016021]; plasma membrane [GO:0005886]; basic amino acid transmembrane transporter activity [GO:0015174]; basic amino acid transport [GO:0015802]	integral component of membrane [GO:0016021]; plasma membrane [GO:0005886]	basic amino acid transport [GO:0015802]	basic amino acid transmembrane transporter activity [GO:0015174]
MEP2	179.0790172	732.89488	-2.03300998	1.13E-19	3.76E-17	P38971	ALP1_YEAST	Basic amino-acid permease	MEP2 AMT2 YNL142W N1207 N1820	499	integral component of membrane [GO:0016021]; plasma membrane [GO:0005886]; ammonium transmembrane transporter activity [GO:0008519]; ammonium transport [GO:0015696]; nitrogen utilization [GO:0019740]; pseudohyphal growth [GO:0007124]	integral component of membrane [GO:0016021]; plasma membrane [GO:0005886]	ammonium transport [GO:0015696]; nitrogen utilization [GO:0019740]; pseudohyphal growth [GO:0007124]	ammonium transmembrane transporter activity [GO:0008519]
DCP2	101.5051098	229.6315769	-1.177768687	0.000234306	0.004975103	P41948	MEP2_YEAST	Ammonium transporter MEP2	DCP2 PSU1 YNL118C N1917	970	cytoplasm [GO:0005737]; cytoplasmic side of membrane [GO:0098562]; nucleus [GO:0005634]; P-body [GO:0000932]; chromatin binding [GO:0003682]; hydrolase activity [GO:0016787]; m7G(5')pppN diphosphatase activity [GO:0050072]; manganese ion binding [GO:0030145]; mRNA binding [GO:0003729]; deadenylation-dependent decapping of nuclear-transcribed mRNA [GO:0000290]; deadenylation-independent decapping …	cytoplasm [GO:0005737]; cytoplasmic side of membrane [GO:0098562]; nucleus [GO:0005634]; P-body [GO:0000932]	deadenylation-dependent decapping of nuclear-transcribed mRNA [GO:0000290]; deadenylation-independent decapping of nuclear-transcribed mRNA [GO:0031087]; mRNA processing [GO:0006397]; nuclear-transcribed mRNA catabolic process, nonsense-mediated decay [GO:0000184]; positive regulation of transcription initiation from RNA polymerase II promoter [GO:0060261]; stress granule assembly [GO:0034063]	chromatin binding [GO:0003682]; hydrolase activity [GO:0016787]; m7G(5')pppN diphosphatase activity [GO:0050072]; manganese ion binding [GO:0030145]; mRNA binding [GO:0003729]
MLS1	815.8550476	2947.211943	-1.852966055	5.20E-27	5.76E-24	P53550	DCP2_YEAST	m7GpppN-mRNA hydrolase (EC 3.6.1.62) (Protein PSU1) (mRNA-decapping enzyme subunit 2)	MLS1 YNL117W N1921	554	cytosol [GO:0005829]; glyoxysome [GO:0009514]; peroxisomal matrix [GO:0005782]; peroxisome [GO:0005777]; malate synthase activity [GO:0004474]; glyoxylate cycle [GO:0006097]; tricarboxylic acid cycle [GO:0006099]	cytosol [GO:0005829]; glyoxysome [GO:0009514]; peroxisomal matrix [GO:0005782]; peroxisome [GO:0005777]	glyoxylate cycle [GO:0006097]; tricarboxylic acid cycle [GO:0006099]	malate synthase activity [GO:0004474]
YNL097W-A	0	33.26745478	#NAME?	0.00262178	0.036080688	P30952	MASY_YEAST	Malate synthase 1, glyoxysomal (EC 2.3.3.9)	YNL097W-A	51
NCE103	923.3174515	2429.461963	-1.395738185	6.41E-16	1.12E-13	Q8TGL8	YN097_YEAST	Putative uncharacterized protein YNL097W-A	NCE103 NCE3 YNL036W N2695	221	mitochondrial intermembrane space [GO:0005758]; nucleus [GO:0005634]; carbonate dehydratase activity [GO:0004089]; zinc ion binding [GO:0008270]; carbon utilization [GO:0015976]; cellular response to carbon dioxide [GO:0071244]; cellular response to oxidative stress [GO:0034599]	mitochondrial intermembrane space [GO:0005758]; nucleus [GO:0005634]	carbon utilization [GO:0015976]; cellular response to carbon dioxide [GO:0071244]; cellular response to oxidative stress [GO:0034599]	carbonate dehydratase activity [GO:0004089]; zinc ion binding [GO:0008270]
IDP3	186.7408317	376.0817362	-1.010008832	0.000101738	0.002423851	P53615	CAN_YEAST	Carbonic anhydrase (EC 4.2.1.1) (Carbonate dehydratase) (Non-classical export protein 3)	IDP3 YNL009W N2870	420	cytoplasm [GO:0005737]; peroxisome [GO:0005777]; isocitrate dehydrogenase (NADP+) activity [GO:0004450]; magnesium ion binding [GO:0000287]; NAD binding [GO:0051287]; fatty acid beta-oxidation [GO:0006635]; glyoxylate cycle [GO:0006097]; isocitrate metabolic process [GO:0006102]; NADPH regeneration [GO:0006740]; tricarboxylic acid cycle [GO:0006099]	cytoplasm [GO:0005737]; peroxisome [GO:0005777]	fatty acid beta-oxidation [GO:0006635]; glyoxylate cycle [GO:0006097]; isocitrate metabolic process [GO:0006102]; NADPH regeneration [GO:0006740]; tricarboxylic acid cycle [GO:0006099]	isocitrate dehydrogenase (NADP+) activity [GO:0004450]; magnesium ion binding [GO:0000287]; NAD binding [GO:0051287]
ACC1	499.0459687	844.2723876	-0.758535818	0.0003572	0.007216748	P53982	IDHH_YEAST	Isocitrate dehydrogenase [NADP] (IDH) (EC 1.1.1.42) (IDP) (NADP(+)-specific ICDH) (Oxalosuccinate decarboxylase)	ACC1 ABP2 FAS3 MTR7 YNR016C N3175	2233	acetyl-CoA carboxylase complex [GO:0009317]; endoplasmic reticulum membrane [GO:0005789]; acetyl-CoA binding [GO:1905502]; acetyl-CoA carboxylase activity [GO:0003989]; ATP binding [GO:0005524]; biotin carboxylase activity [GO:0004075]; carboxyl- or carbamoyltransferase activity [GO:0016743]; metal ion binding [GO:0046872]; protein homodimerization activity [GO:0042803]; acetyl-CoA biosynthetic p…	acetyl-CoA carboxylase complex [GO:0009317]; endoplasmic reticulum membrane [GO:0005789]	acetyl-CoA biosynthetic process [GO:0006085]; long-chain fatty acid biosynthetic process [GO:0042759]; malonyl-CoA biosynthetic process [GO:2001295]; nuclear envelope organization [GO:0006998]; protein import into nucleus [GO:0006606]	acetyl-CoA binding [GO:1905502]; acetyl-CoA carboxylase activity [GO:0003989]; ATP binding [GO:0005524]; biotin carboxylase activity [GO:0004075]; carboxyl- or carbamoyltransferase activity [GO:0016743]; metal ion binding [GO:0046872]; protein homodimerization activity [GO:0042803]
BIO5	215.0070152	470.8895007	-1.131004823	1.63E-06	6.18E-05	Q00955	ACAC_YEAST	Acetyl-CoA carboxylase (ACC) (EC 6.4.1.2) (Fatty acid synthetase 3) (mRNA transport-defective protein 7) [Includes: Biotin carboxylase (EC 6.3.4.14)]	BIO5 YNR056C N3502	561	integral component of plasma membrane [GO:0005887]; plasma membrane [GO:0005886]; antiporter activity [GO:0015297]; L-amino acid transmembrane transporter activity [GO:0015179]; transmembrane transporter activity [GO:0022857]; biotin biosynthetic process [GO:0009102]; vitamin transport [GO:0051180]	integral component of plasma membrane [GO:0005887]; plasma membrane [GO:0005886]	biotin biosynthetic process [GO:0009102]; vitamin transport [GO:0051180]	antiporter activity [GO:0015297]; L-amino acid transmembrane transporter activity [GO:0015179]; transmembrane transporter activity [GO:0022857]
PEX11	148.5274373	438.0696177	-1.560430697	4.06E-10	3.10E-08	P53744	BIO5_YEAST	7-keto 8-aminopelargonic acid transporter (KAPA transporter)	PEX11 PMP24 PMP27 YOL147C O0454	236	endoplasmic reticulum [GO:0005783]; integral component of peroxisomal membrane [GO:0005779]; peroxisomal importomer complex [GO:1990429]; peroxisomal membrane [GO:0005778]; peroxisome [GO:0005777]; fatty acid oxidation [GO:0019395]; peroxisome fission [GO:0016559]; peroxisome organization [GO:0007031]; regulation of peroxisome size [GO:0044375]; signal transduction [GO:0007165]	endoplasmic reticulum [GO:0005783]; integral component of peroxisomal membrane [GO:0005779]; peroxisomal importomer complex [GO:1990429]; peroxisomal membrane [GO:0005778]; peroxisome [GO:0005777]	fatty acid oxidation [GO:0019395]; peroxisome fission [GO:0016559]; peroxisome organization [GO:0007031]; regulation of peroxisome size [GO:0044375]; signal transduction [GO:0007165]
MDH2	2214.6899	7544.668702	-1.768352844	1.75E-35	3.87E-32	Q12462	PEX11_YEAST	Peroxisomal membrane protein PMP27 (Peroxin-11)	MDH2 YOL126C	377	cytosol [GO:0005829]; nuclear periphery [GO:0034399]; L-malate dehydrogenase activity [GO:0030060]; gluconeogenesis [GO:0006094]; malate metabolic process [GO:0006108]; protein import into peroxisome matrix [GO:0016558]; tricarboxylic acid cycle [GO:0006099]	cytosol [GO:0005829]; nuclear periphery [GO:0034399]	gluconeogenesis [GO:0006094]; malate metabolic process [GO:0006108]; protein import into peroxisome matrix [GO:0016558]; tricarboxylic acid cycle [GO:0006099]	L-malate dehydrogenase activity [GO:0030060]
ZEO1	590.6172546	902.0109506	-0.610921444	0.002920837	0.039063996	P22133	MDHC_YEAST	Malate dehydrogenase, cytoplasmic (EC 1.1.1.37)	ZEO1 YOL109W O0738	113	extrinsic component of plasma membrane [GO:0019897]; fungal-type cell wall organization [GO:0031505]	extrinsic component of plasma membrane [GO:0019897]	fungal-type cell wall organization [GO:0031505]
IZH4	24.4541523	100.9478959	-2.04545948	6.27E-05	0.001579444	Q08245	ZEO1_YEAST	Protein ZEO1 (Zeocin resistance protein 1)	IZH4 YOL101C	312	endoplasmic reticulum membrane [GO:0005789]; integral component of membrane [GO:0016021]; receptor activity [GO:0004872]; cellular zinc ion homeostasis [GO:0006882]	endoplasmic reticulum membrane [GO:0005789]; integral component of membrane [GO:0016021]	cellular zinc ion homeostasis [GO:0006882]	receptor activity [GO:0004872]
HAL9	22.12867907	70.9909485	-1.681717755	0.002969847	0.03963971	Q99393	IZH4_YEAST	ADIPOR-like receptor IZH4 (Implicated in zinc homeostasis protein 4)	HAL9 YOL089C O0938	1030	cytoplasm [GO:0005737]; nucleus [GO:0005634]; DNA binding [GO:0003677]; RNA polymerase II transcription factor activity, sequence-specific DNA binding [GO:0000981]; zinc ion binding [GO:0008270]; positive regulation of transcription from RNA polymerase II promoter [GO:0045944]; response to salt stress [GO:0009651]; transcription, DNA-templated [GO:0006351]	cytoplasm [GO:0005737]; nucleus [GO:0005634]	positive regulation of transcription from RNA polymerase II promoter [GO:0045944]; response to salt stress [GO:0009651]; transcription, DNA-templated [GO:0006351]	DNA binding [GO:0003677]; RNA polymerase II transcription factor activity, sequence-specific DNA binding [GO:0000981]; zinc ion binding [GO:0008270]
PHM7	150.8962874	391.748371	-1.376369965	1.29E-07	6.23E-06	Q12180	HAL9_YEAST	Halotolerance protein 9	PHM7 YOL084W 00953	991	integral component of membrane [GO:0016021]; plasma membrane [GO:0005886]; ion transport [GO:0006811]	integral component of membrane [GO:0016021]; plasma membrane [GO:0005886]	ion transport [GO:0006811]
DDR2	2851.690577	7654.028786	-1.424401876	2.05E-23	1.24E-20	Q12252	PHM7_YEAST	Phosphate metabolism protein 7	DDR2 YOL052C-A YOL052BC YOL053C-A	61	cellular response to DNA damage stimulus [GO:0006974]; cellular response to heat [GO:0034605]; cellular response to hydrogen peroxide [GO:0070301]; cellular response to starvation [GO:0009267]		cellular response to DNA damage stimulus [GO:0006974]; cellular response to heat [GO:0034605]; cellular response to hydrogen peroxide [GO:0070301]; cellular response to starvation [GO:0009267]
LPX1	62.86560634	163.4776157	-1.378750265	0.00019822	0.004358495	P89113	DDR2_YEAST	Protein DDR2	LPX1 YOR084W YOR3120W	387	peroxisomal matrix [GO:0005782]; lipase activity [GO:0016298]; triglyceride lipase activity [GO:0004806]; peroxisome organization [GO:0007031]; triglyceride catabolic process [GO:0019433]	peroxisomal matrix [GO:0005782]	peroxisome organization [GO:0007031]; triglyceride catabolic process [GO:0019433]	lipase activity [GO:0016298]; triglyceride lipase activity [GO:0004806]
CRC1	254.4153673	685.0822516	-1.429091394	1.60E-10	1.29E-08	Q12405	LPX1_YEAST	Peroxisomal membrane protein LPX1 (EC 3.1.1.-) (Lipase of peroxisomes protein 1)	CRC1 YOR100C YOR3193C	327	integral component of membrane [GO:0016021]; mitochondrial inner membrane [GO:0005743]; carnitine transmembrane transporter activity [GO:0015226]; carnitine:acyl carnitine antiporter activity [GO:0005476]; carnitine transport [GO:0015879]; fatty acid metabolic process [GO:0006631]; mitochondrial transport [GO:0006839]	integral component of membrane [GO:0016021]; mitochondrial inner membrane [GO:0005743]	carnitine transport [GO:0015879]; fatty acid metabolic process [GO:0006631]; mitochondrial transport [GO:0006839]	carnitine:acyl carnitine antiporter activity [GO:0005476]; carnitine transmembrane transporter activity [GO:0015226]
DCI1	0	53.96200113	#NAME?	0.002327466	0.033413967	Q12289	CRC1_YEAST	Mitochondrial carnitine carrier	DCI1 ECI2 EHD2 YOR180C	271	peroxisomal matrix [GO:0005782]; dodecenoyl-CoA delta-isomerase activity [GO:0004165]; fatty acid beta-oxidation [GO:0006635]	peroxisomal matrix [GO:0005782]	fatty acid beta-oxidation [GO:0006635]	dodecenoyl-CoA delta-isomerase activity [GO:0004165]
WTM1	319.9981037	523.672954	-0.71060274	0.003071951	0.040514404	Q08558	DCI1_YEAST	Delta(3,5)-Delta(2,4)-dienoyl-CoA isomerase (EC 5.3.3.-)	WTM1 YOR230W YOR50-20	437	cytoplasm [GO:0005737]; nucleus [GO:0005634]; transcription corepressor activity [GO:0003714]; maintenance of protein location in nucleus [GO:0051457]; negative regulation of chromatin silencing at silent mating-type cassette [GO:0061186]; negative regulation of chromatin silencing at telomere [GO:0031939]; negative regulation of transcription from RNA polymerase II promoter involved in meiotic c…	cytoplasm [GO:0005737]; nucleus [GO:0005634]	maintenance of protein location in nucleus [GO:0051457]; negative regulation of chromatin silencing at silent mating-type cassette [GO:0061186]; negative regulation of chromatin silencing at telomere [GO:0031939]; negative regulation of transcription from RNA polymerase II promoter involved in meiotic cell cycle [GO:0010674]; positive regulation of transcription from RNA polymerase II promoter [G…	transcription corepressor activity [GO:0003714]
RPN8	179.6465061	346.253858	-0.946669269	0.000417498	0.008283906	Q12363	WTM1_YEAST	Transcriptional modulator WTM1	RPN8 YOR261C O5360	338	proteasome regulatory particle, lid subcomplex [GO:0008541]; proteasome storage granule [GO:0034515]; proteasome-mediated ubiquitin-dependent protein catabolic process [GO:0043161]; ubiquitin-dependent protein catabolic process [GO:0006511]	proteasome regulatory particle, lid subcomplex [GO:0008541]; proteasome storage granule [GO:0034515]	proteasome-mediated ubiquitin-dependent protein catabolic process [GO:0043161]; ubiquitin-dependent protein catabolic process [GO:0006511]
TPO4	107.6815288	251.5932691	-1.224322528	5.16E-05	0.001314926	Q08723	RPN8_YEAST	26S proteasome regulatory subunit RPN8	TPO4 YOR273C O5440	659	fungal-type vacuole membrane [GO:0000329]; integral component of membrane [GO:0016021]; plasma membrane [GO:0005886]; antiporter activity [GO:0015297]; spermidine transmembrane transporter activity [GO:0015606]; spermine transmembrane transporter activity [GO:0000297]; spermidine transport [GO:0015848]; spermine transport [GO:0000296]	fungal-type vacuole membrane [GO:0000329]; integral component of membrane [GO:0016021]; plasma membrane [GO:0005886]	spermidine transport [GO:0015848]; spermine transport [GO:0000296]	antiporter activity [GO:0015297]; spermidine transmembrane transporter activity [GO:0015606]; spermine transmembrane transporter activity [GO:0000297]
RDL1	1637.080889	2502.511774	-0.612251249	0.00209416	0.031071171	Q12256	TPO4_YEAST	Polyamine transporter 4	RDL1 YOR285W	139	mitochondrion [GO:0005739]; thiosulfate sulfurtransferase activity [GO:0004792]	mitochondrion [GO:0005739]		thiosulfate sulfurtransferase activity [GO:0004792]
RRP36	0	41.29184416	#NAME?	0.002431262	0.034156518	Q12305	RDL1_YEAST	Thiosulfate sulfurtransferase RDL1, mitochondrial (EC 2.8.1.1) (Rhodanese-like protein 1)	RRP36 YOR287C	300	90S preribosome [GO:0030686]; nucleolus [GO:0005730]; nucleoplasm [GO:0005654]; cleavage involved in rRNA processing [GO:0000469]; maturation of SSU-rRNA from tricistronic rRNA transcript (SSU-rRNA, 5.8S rRNA, LSU-rRNA) [GO:0000462]; ribosomal small subunit biogenesis [GO:0042274]; rRNA methylation [GO:0031167]	90S preribosome [GO:0030686]; nucleolus [GO:0005730]; nucleoplasm [GO:0005654]	cleavage involved in rRNA processing [GO:0000469]; maturation of SSU-rRNA from tricistronic rRNA transcript (SSU-rRNA, 5.8S rRNA, LSU-rRNA) [GO:0000462]; ribosomal small subunit biogenesis [GO:0042274]; rRNA methylation [GO:0031167]
COT1	214.4395262	495.9050528	-1.209493072	2.09E-07	9.76E-06	Q12481	RRP36_YEAST	rRNA biogenesis protein RRP36 (Ribosomal RNA-processing protein 36)	COT1 YOR316C O6131	439	fungal-type vacuole [GO:0000324]; integral component of membrane [GO:0016021]; mitochondrial membrane [GO:0031966]; cobalt ion transmembrane transporter activity [GO:0015087]; zinc ion transmembrane transporter activity [GO:0005385]; cellular zinc ion homeostasis [GO:0006882]; cobalt ion transport [GO:0006824]; regulation of sequestering of zinc ion [GO:0061088]; response to zinc ion [GO:0010043]…	fungal-type vacuole [GO:0000324]; integral component of membrane [GO:0016021]; mitochondrial membrane [GO:0031966]	cellular zinc ion homeostasis [GO:0006882]; cobalt ion transport [GO:0006824]; regulation of sequestering of zinc ion [GO:0061088]; response to zinc ion [GO:0010043]; zinc II ion transport [GO:0006829]	cobalt ion transmembrane transporter activity [GO:0015087]; zinc ion transmembrane transporter activity [GO:0005385]
PDR10	107.0395108	262.4196393	-1.293732267	1.41E-05	0.000417611	P32798	COT1_YEAST	Cobalt uptake protein COT1	PDR10 YOR328W	1564	integral component of membrane [GO:0016021]; plasma membrane [GO:0005886]; ATP binding [GO:0005524]; ATPase activity, coupled to transmembrane movement of substances [GO:0042626]; drug export [GO:0046618]; drug transmembrane transport [GO:0006855]; replication-born double-strand break repair via sister chromatid exchange [GO:1990414]	integral component of membrane [GO:0016021]; plasma membrane [GO:0005886]	drug export [GO:0046618]; drug transmembrane transport [GO:0006855]; replication-born double-strand break repair via sister chromatid exchange [GO:1990414]	ATPase activity, coupled to transmembrane movement of substances [GO:0042626]; ATP binding [GO:0005524]
PUT4	84.42679645	200.7595016	-1.249695392	0.000344256	0.006997776	P51533	PDR10_YEAST	ATP-dependent permease PDR10	PUT4 YOR348C O6345	627	integral component of membrane [GO:0016021]; plasma membrane [GO:0005886]; L-proline transmembrane transporter activity [GO:0015193]; neutral amino acid transmembrane transporter activity [GO:0015175]; gamma-aminobutyric acid transport [GO:0015812]; neutral amino acid transport [GO:0015804]; proline transport [GO:0015824]	integral component of membrane [GO:0016021]; plasma membrane [GO:0005886]	gamma-aminobutyric acid transport [GO:0015812]; neutral amino acid transport [GO:0015804]; proline transport [GO:0015824]	L-proline transmembrane transporter activity [GO:0015193]; neutral amino acid transmembrane transporter activity [GO:0015175]
ALD4	463.3983216	840.6612697	-0.859271789	5.22E-05	0.001324506	P46367	ALDH4_YEAST	Potassium-activated aldehyde dehydrogenase, mitochondrial (EC 1.2.1.5) (K(+)-activated acetaldehyde dehydrogenase) (K(+)-ACDH)	ALD3 ALD4 YMR169C YM8520.18C	506	cytoplasm [GO:0005737]; aldehyde dehydrogenase (NAD) activity [GO:0004029]; beta-alanine biosynthetic process [GO:0019483]; pantothenate biosynthetic process [GO:0015940]; polyamine catabolic process [GO:0006598]	cytoplasm [GO:0005737]	beta-alanine biosynthetic process [GO:0019483]; pantothenate biosynthetic process [GO:0015940]; polyamine catabolic process [GO:0006598]	aldehyde dehydrogenase (NAD) activity [GO:0004029]
GDH1	178.7274371	358.6037261	-1.004629354	0.000149059	0.003370052	P54114	ALDH3_YEAST	Aldehyde dehydrogenase [NAD(P)+] 2 (EC 1.2.1.3)	GDH1 URE1 YOR375C	454	cytosol [GO:0005829]; nucleus [GO:0005634]; glutamate dehydrogenase (NAD+) activity [GO:0004352]; glutamate dehydrogenase (NADP+) activity [GO:0004354]; ammonia assimilation cycle [GO:0019676]; glutamate biosynthetic process [GO:0006537]	cytosol [GO:0005829]; nucleus [GO:0005634]	ammonia assimilation cycle [GO:0019676]; glutamate biosynthetic process [GO:0006537]	glutamate dehydrogenase (NAD+) activity [GO:0004352]; glutamate dehydrogenase (NADP+) activity [GO:0004354]
YRF1-8	107.4834692	215.4625832	-1.003322563	0.002367294	0.033643027	P07262	DHE4_YEAST	NADP-specific glutamate dehydrogenase 1 (NADP-GDH 1) (EC 1.4.1.4) (NADP-dependent glutamate dehydrogenase 1)	YRF1-8 YOR396W O7535	1796	ATP binding [GO:0005524]; helicase activity [GO:0004386]; nucleic acid binding [GO:0003676]			ATP binding [GO:0005524]; helicase activity [GO:0004386]; nucleic acid binding [GO:0003676]
SRP68	46.34585725	115.7208783	-1.320136888	0.002588702	0.035773603	P0CX22	YRF18_YEAST	Y' element ATP-dependent helicase protein 1 copy 8 (EC 3.6.4.12)	SRP68 YPL243W	599	endoplasmic reticulum [GO:0005783]; nucleus [GO:0005634]; signal recognition particle, endoplasmic reticulum targeting [GO:0005786]; 7S RNA binding [GO:0008312]; endoplasmic reticulum signal peptide binding [GO:0030942]; signal recognition particle binding [GO:0005047]; SRP-dependent cotranslational protein targeting to membrane, translocation [GO:0006616]	endoplasmic reticulum [GO:0005783]; nucleus [GO:0005634]; signal recognition particle, endoplasmic reticulum targeting [GO:0005786]	SRP-dependent cotranslational protein targeting to membrane, translocation [GO:0006616]	7S RNA binding [GO:0008312]; endoplasmic reticulum signal peptide binding [GO:0030942]; signal recognition particle binding [GO:0005047]
GRE1	1399.81961	2823.41108	-1.012198272	4.20E-08	2.29E-06	P38687	SRP68_YEAST	Signal recognition particle subunit SRP68 (Signal recognition particle 68 kDa protein homolog)	GRE1 YPL223C	168	cytoplasm [GO:0005737]	cytoplasm [GO:0005737]
PRM4	44.89937615	126.5490349	-1.4949292	0.000446656	0.008732131	Q08969	GRE1_YEAST	Protein GRE1 (Genes de respuesta a estres protein 1) (Hydrophilin)	PRM4 YPL156C P2578	284	cell [GO:0005623]; integral component of membrane [GO:0016021]; electron carrier activity [GO:0009055]; protein disulfide oxidoreductase activity [GO:0015035]; cell redox homeostasis [GO:0045454]	cell [GO:0005623]; integral component of membrane [GO:0016021]	cell redox homeostasis [GO:0045454]	electron carrier activity [GO:0009055]; protein disulfide oxidoreductase activity [GO:0015035]
PXA1	32.15604372	186.4022702	-2.535257609	8.18E-11	6.97E-09	Q12498	PRM4_YEAST	Pheromone-regulated membrane protein 4	PXA1 PAL1 PAT2 SSH2 YPL147W LPI1W P2607	870	integral component of peroxisomal membrane [GO:0005779]; peroxisome [GO:0005777]; ATP binding [GO:0005524]; ATPase activity, coupled to transmembrane movement of substances [GO:0042626]; peroxisomal fatty-acyl-CoA transporter activity [GO:0005325]; fatty acid beta-oxidation [GO:0006635]; fatty acid transport [GO:0015908]; fatty-acyl-CoA transport [GO:0015916]; long-chain fatty acid catabolic proc…	integral component of peroxisomal membrane [GO:0005779]; peroxisome [GO:0005777]	fatty acid beta-oxidation [GO:0006635]; fatty acid transport [GO:0015908]; fatty-acyl-CoA transport [GO:0015916]; long-chain fatty acid catabolic process [GO:0042758]; peroxisomal long-chain fatty acid import [GO:0015910]; very long-chain fatty acid catabolic process [GO:0042760]	ATPase activity, coupled to transmembrane movement of substances [GO:0042626]; ATP binding [GO:0005524]; peroxisomal fatty-acyl-CoA transporter activity [GO:0005325]
YPL113C	25.05163113	111.9051217	-2.159299622	1.33E-05	0.000400811	P41909	PXA1_YEAST	Peroxisomal long-chain fatty acid import protein 2 (Peroxisomal ABC transporter 1)	YPL113C	396	cytosol [GO:0005829]; nucleus [GO:0005634]; glyoxylate reductase (NADP) activity [GO:0030267]; hydroxypyruvate reductase activity [GO:0016618]; NAD binding [GO:0051287]; oxidoreductase activity, acting on the CH-OH group of donors, NAD or NADP as acceptor [GO:0016616]; protein homodimerization activity [GO:0042803]; transcription corepressor activity [GO:0003714]	cytosol [GO:0005829]; nucleus [GO:0005634]		glyoxylate reductase (NADP) activity [GO:0030267]; hydroxypyruvate reductase activity [GO:0016618]; NAD binding [GO:0051287]; oxidoreductase activity, acting on the CH-OH group of donors, NAD or NADP as acceptor [GO:0016616]; protein homodimerization activity [GO:0042803]; transcription corepressor activity [GO:0003714]
CAR1	81.58283577	188.0227212	-1.204569452	0.000610185	0.011266385	Q02961	YP113_YEAST	Putative 2-hydroxyacid dehydrogenase YPL113C (EC 1.-.-.-)	CAR1 YPL111W LPH15W	333	cytosol [GO:0005829]; arginase activity [GO:0004053]; manganese ion binding [GO:0030145]; ornithine carbamoyltransferase inhibitor activity [GO:0090369]; zinc ion binding [GO:0008270]; arginine catabolic process to ornithine [GO:0019547]; regulation of ornithine metabolic process [GO:0090368]; urea cycle [GO:0000050]	cytosol [GO:0005829]	arginine catabolic process to ornithine [GO:0019547]; regulation of ornithine metabolic process [GO:0090368]; urea cycle [GO:0000050]	arginase activity [GO:0004053]; manganese ion binding [GO:0030145]; ornithine carbamoyltransferase inhibitor activity [GO:0090369]; zinc ion binding [GO:0008270]
YPL109C	0	41.22820274	#NAME?	0.003334678	0.043461975	P00812	ARGI_YEAST	Arginase (EC 3.5.3.1)	YPL109C LPH17C	657	mitochondrion [GO:0005739]	mitochondrion [GO:0005739]
BRO1	0	50.8760251	#NAME?	0.003448379	0.044594115	Q02981	YP109_YEAST	ABC1 family protein YPL109C, mitochondrial	BRO1 ASI6 LPF2 NPI3 VPS31 YPL084W	844	cytoplasm [GO:0005737]; endosome [GO:0005768]; endosome membrane [GO:0010008]; deubiquitinase activator activity [GO:0035800]; ATP export [GO:1904669]; intralumenal vesicle formation [GO:0070676]; mitochondria-associated ubiquitin-dependent protein catabolic process [GO:0072671]; positive regulation of ubiquitin-specific protease activity [GO:2000158]; protein deubiquitination [GO:0016579]; prote…	cytoplasm [GO:0005737]; endosome [GO:0005768]; endosome membrane [GO:0010008]	ATP export [GO:1904669]; intralumenal vesicle formation [GO:0070676]; mitochondria-associated ubiquitin-dependent protein catabolic process [GO:0072671]; positive regulation of ubiquitin-specific protease activity [GO:2000158]; protein deubiquitination [GO:0016579]; protein localization to endosome [GO:0036010]; protein targeting to vacuole involved in ubiquitin-dependent protein catabolic proces…	deubiquitinase activator activity [GO:0035800]
ALD6	336.5077658	582.3440688	-0.791231999	0.000739953	0.013150979	P48582	BRO1_YEAST	Vacuolar-sorting protein BRO1 (Amino acid sensor-independent protein 6) (BCK1-like resistance to osmotic shock protein 1) (BRO domain-containing protein 1) (Nitrogen permease inactivating protein 3) (Vacuolar protein-sorting-associated protein 31)	ALD6 ALDH1 YPL061W LPE9	500	cytosol [GO:0005829]; mitochondrion [GO:0005739]; aldehyde dehydrogenase (NAD) activity [GO:0004029]; aldehyde dehydrogenase (NADP+) activity [GO:0033721]; aldehyde dehydrogenase [NAD(P)+] activity [GO:0004030]; acetate biosynthetic process [GO:0019413]; ethanol catabolic process [GO:0006068]; NADPH regeneration [GO:0006740]; response to salt stress [GO:0009651]	cytosol [GO:0005829]; mitochondrion [GO:0005739]	acetate biosynthetic process [GO:0019413]; ethanol catabolic process [GO:0006068]; NADPH regeneration [GO:0006740]; response to salt stress [GO:0009651]	aldehyde dehydrogenase (NAD) activity [GO:0004029]; aldehyde dehydrogenase (NADP+) activity [GO:0033721]; aldehyde dehydrogenase [NAD(P)+] activity [GO:0004030]
LSP1	674.040366	1325.36795	-0.97548604	2.99E-09	1.99E-07	P54115	ALDH6_YEAST	Magnesium-activated aldehyde dehydrogenase, cytosolic (EC 1.2.1.4) (Mg(2+)-activated acetaldehyde dehydrogenase) (Mg(2+)-ACDH)	LSP1 YPL004C	341	eisosome [GO:0032126]; eisosome filament [GO:0036286]; lipid binding [GO:0008289]; eisosome assembly [GO:0070941]; endocytosis [GO:0006897]; negative regulation of protein kinase activity [GO:0006469]; response to heat [GO:0009408]	eisosome [GO:0032126]; eisosome filament [GO:0036286]	eisosome assembly [GO:0070941]; endocytosis [GO:0006897]; negative regulation of protein kinase activity [GO:0006469]; response to heat [GO:0009408]	lipid binding [GO:0008289]
PDH1	102.4764803	273.0568716	-1.413908633	1.55E-06	5.97E-05	Q12230	LSP1_YEAST	Sphingolipid long chain base-responsive protein LSP1	PDH1 YPR002W LPZ2W YP9723.02	516	2 iron, 2 sulfur cluster binding [GO:0051537]; 2-methylcitrate dehydratase activity [GO:0047547]; propionate catabolic process, 2-methylcitrate cycle [GO:0019629]; propionate metabolic process [GO:0019541]; propionate metabolic process, methylcitrate cycle [GO:0019679]		propionate catabolic process, 2-methylcitrate cycle [GO:0019629]; propionate metabolic process [GO:0019541]; propionate metabolic process, methylcitrate cycle [GO:0019679]	2 iron, 2 sulfur cluster binding [GO:0051537]; 2-methylcitrate dehydratase activity [GO:0047547]
ICL2	156.5497565	493.9084219	-1.657622304	1.78E-12	1.84E-10	Q12428	PRPD_YEAST	Probable 2-methylcitrate dehydratase (2-MC dehydratase) (EC 4.2.1.79) ((2S,3S)-2-methylcitrate dehydratase)	ICL2 YPR006C LPZ6C YP9723.06C	575	mitochondrial matrix [GO:0005759]; methylisocitrate lyase activity [GO:0046421]; propionate catabolic process, 2-methylcitrate cycle [GO:0019629]	mitochondrial matrix [GO:0005759]	propionate catabolic process, 2-methylcitrate cycle [GO:0019629]	methylisocitrate lyase activity [GO:0046421]
YPR036W-A	1828.058782	3208.666619	-0.811661439	1.34E-05	0.000400811	Q12031	ACEB_YEAST	Mitochondrial 2-methylisocitrate lyase (Methylisocitrate lyase) (EC 4.1.3.30)	YPR036W-A	67	prospore membrane [GO:0005628]; sporulation resulting in formation of a cellular spore [GO:0030435]	prospore membrane [GO:0005628]	sporulation resulting in formation of a cellular spore [GO:0030435]
MEP3	0	50.45878309	#NAME?	0.003056042	0.04038471	Q3E752	YP036_YEAST	Uncharacterized protein YPR036W-A	MEP3 AMT3 YPR138C P9659.14	489	integral component of membrane [GO:0016021]; plasma membrane [GO:0005886]; ammonium transmembrane transporter activity [GO:0008519]; ammonium transport [GO:0015696]; nitrogen utilization [GO:0019740]	integral component of membrane [GO:0016021]; plasma membrane [GO:0005886]	ammonium transport [GO:0015696]; nitrogen utilization [GO:0019740]	ammonium transmembrane transporter activity [GO:0008519]
SUE1	73.04649141	199.9993914	-1.453108726	3.20E-05	0.000872779	P53390	MEP3_YEAST	Ammonium transporter MEP3	SUE1 YPR151C	206	mitochondrial envelope [GO:0005740]; protein catabolic process [GO:0030163]	mitochondrial envelope [GO:0005740]	protein catabolic process [GO:0030163]
