# Supplementary material for: Temporal profiling of redox-dependent heterogeneity in single cells
Source: eLife journal article supplement (doi:10.7554/elife.37623), 2018-06-05
Supplement: supp [file elife-37623-supp-v1.zip › elife_poa_e37623_Supplementary_File_11.csv]

Row	Oxidized_72h	Reduced_72h	log_FoldChange	Pvalue	FDR_adjusted	Uniprot	Entry name	Protein names	Gene names	Length	Gene ontology (GO)	Gene ontology (cellular component)	Gene ontology (biological process)	Gene ontology (molecular function)
BDH2	784.7327628	351.2529308	1.159691171	4.31E-09	2.79E-07	P39713	BDH2_YEAST	Probable diacetyl reductase [(R)-acetoin forming] 2 (EC 1.1.1.303)	BDH2 YAL061W FUN50	417	cytoplasm [GO:0005737]; nucleus [GO:0005634]; diacetyl reductase ((R)-acetoin forming) activity [GO:0052587]; oxidoreductase activity, acting on the CH-OH group of donors, NAD or NADP as acceptor [GO:0016616]; zinc ion binding [GO:0008270]	cytoplasm [GO:0005737]; nucleus [GO:0005634]		diacetyl reductase ((R)-acetoin forming) activity [GO:0052587]; oxidoreductase activity, acting on the CH-OH group of donors, NAD or NADP as acceptor [GO:0016616]; zinc ion binding [GO:0008270]
BDH1	447.7186501	236.8307236	0.918736165	5.33E-06	0.000183033	P39714	BDH1_YEAST	(R,R)-butanediol dehydrogenase (EC 1.1.1.4)	BDH1 BDH YAL060W FUN49	382	cytoplasm [GO:0005737]; (R,R)-butanediol dehydrogenase activity [GO:0000721]; zinc ion binding [GO:0008270]; alcohol metabolic process [GO:0006066]; butanediol biosynthetic process [GO:0034079]	cytoplasm [GO:0005737]	alcohol metabolic process [GO:0006066]; butanediol biosynthetic process [GO:0034079]	(R,R)-butanediol dehydrogenase activity [GO:0000721]; zinc ion binding [GO:0008270]
YAL018C	22.64716652	0	Inf	1.14E-05	0.00035207	P31379	LDS1_YEAST	Outer spore wall protein LDS1 (Lipid droplets in sporulation protein 1)	LDS1 YAL018C YAL003	325	ascospore wall [GO:0005619]; integral component of membrane [GO:0016021]; lipid particle [GO:0005811]; prospore membrane [GO:0005628]; ascospore wall assembly [GO:0030476]	ascospore wall [GO:0005619]; integral component of membrane [GO:0016021]; lipid particle [GO:0005811]; prospore membrane [GO:0005628]	ascospore wall assembly [GO:0030476]
SSA1	1631.137253	1216.738828	0.422858655	0.001999751	0.029920774	P10591	HSP71_YEAST	Heat shock protein SSA1 (Heat shock protein YG100)	SSA1 YAL005C	642	cytoplasm [GO:0005737]; extracellular region [GO:0005576]; fungal-type cell wall [GO:0009277]; fungal-type vacuole membrane [GO:0000329]; nucleus [GO:0005634]; polysome [GO:0005844]; ATP binding [GO:0005524]; ATPase activity [GO:0016887]; tRNA binding [GO:0000049]; unfolded protein binding [GO:0051082]; clathrin coat disassembly [GO:0072318]; cytoplasmic translation [GO:0002181]; negative regulat…	cytoplasm [GO:0005737]; extracellular region [GO:0005576]; fungal-type cell wall [GO:0009277]; fungal-type vacuole membrane [GO:0000329]; nucleus [GO:0005634]; polysome [GO:0005844]	clathrin coat disassembly [GO:0072318]; cytoplasmic translation [GO:0002181]; negative regulation of cell aging [GO:0090344]; proteasome-mediated ubiquitin-dependent protein catabolic process [GO:0043161]; protein folding [GO:0006457]; protein import into nucleus, translocation [GO:0000060]; protein polyubiquitination [GO:0000209]; protein refolding [GO:0042026]; protein targeting to mitochondrio…	ATPase activity [GO:0016887]; ATP binding [GO:0005524]; tRNA binding [GO:0000049]; unfolded protein binding [GO:0051082]
YBL107W-A	184.9783851	102.2254787	0.855601882	0.001982171	0.029808798	Q6B113	YB107_YEAST	Putative uncharacterized protein YBL107W-A	YBL107W-A	34
ATP1	547.4102583	375.2838413	0.544640298	0.00230439	0.03322621	P07251	ATPA_YEAST	ATP synthase subunit alpha, mitochondrial	ATP1 YBL099W YBL0827	545	cytosol [GO:0005829]; mitochondrial intermembrane space [GO:0005758]; mitochondrial nucleoid [GO:0042645]; mitochondrial proton-transporting ATP synthase, catalytic core [GO:0005754]; mitochondrion [GO:0005739]; ATP binding [GO:0005524]; proton-transporting ATP synthase activity, rotational mechanism [GO:0046933]; ATP synthesis coupled proton transport [GO:0015986]; protein targeting to mitochond…	cytosol [GO:0005829]; mitochondrial intermembrane space [GO:0005758]; mitochondrial nucleoid [GO:0042645]; mitochondrial proton-transporting ATP synthase, catalytic core [GO:0005754]; mitochondrion [GO:0005739]	ATP synthesis coupled proton transport [GO:0015986]; protein targeting to mitochondrion [GO:0006626]	ATP binding [GO:0005524]; proton-transporting ATP synthase activity, rotational mechanism [GO:0046933]
ATG8	869.6236917	588.2715967	0.563908864	0.000351903	0.007131404	P38182	ATG8_YEAST	Autophagy-related protein 8 (Autophagy-related ubiquitin-like modifier ATG8) (Cytoplasm to vacuole targeting protein 5)	ATG8 APG8 AUT7 CVT5 YBL078C YBL0732	117	autophagosome [GO:0005776]; autophagosome membrane [GO:0000421]; Cvt vesicle membrane [GO:0033110]; cytoplasm [GO:0005737]; cytosol [GO:0005829]; extrinsic component of membrane [GO:0019898]; fungal-type vacuole membrane [GO:0000329]; pre-autophagosomal structure [GO:0000407]; protein tag [GO:0031386]; autophagosome assembly [GO:0000045]; autophagy [GO:0006914]; cellular protein complex localizat…	autophagosome [GO:0005776]; autophagosome membrane [GO:0000421]; Cvt vesicle membrane [GO:0033110]; cytoplasm [GO:0005737]; cytosol [GO:0005829]; extrinsic component of membrane [GO:0019898]; fungal-type vacuole membrane [GO:0000329]; pre-autophagosomal structure [GO:0000407]	autophagosome assembly [GO:0000045]; autophagy [GO:0006914]; cellular protein complex localization [GO:0034629]; cellular response to nitrogen starvation [GO:0006995]; CVT pathway [GO:0032258]; ER to Golgi vesicle-mediated transport [GO:0006888]; late nucleophagy [GO:0044805]; membrane fusion [GO:0061025]; mitophagy [GO:0000422]; piecemeal microautophagy of nucleus [GO:0034727]; protein targeting…	protein tag [GO:0031386]
SSA3	1759.823816	744.8763185	1.2403582	4.68E-15	7.23E-13	P09435	HSP73_YEAST	Heat shock protein SSA3	SSA3 YBL075C YBL06.07 YBL0610	649	cytosol [GO:0005829]; ATP binding [GO:0005524]; ATPase activity [GO:0016887]; unfolded protein binding [GO:0051082]; misfolded or incompletely synthesized protein catabolic process [GO:0006515]; protein folding [GO:0006457]; SRP-dependent cotranslational protein targeting to membrane, translocation [GO:0006616]	cytosol [GO:0005829]	misfolded or incompletely synthesized protein catabolic process [GO:0006515]; protein folding [GO:0006457]; SRP-dependent cotranslational protein targeting to membrane, translocation [GO:0006616]	ATPase activity [GO:0016887]; ATP binding [GO:0005524]; unfolded protein binding [GO:0051082]
AST1	56.12169844	0	Inf	0.002661141	0.036396307	P35183	AST1_YEAST	Protein AST1	AST1 YBL069W YBL06.04 YBL0617	429	Golgi apparatus [GO:0005794]; late endosome [GO:0005770]; membrane raft [GO:0045121]; plasma membrane [GO:0005886]; oxidoreductase activity [GO:0016491]; protein targeting to membrane [GO:0006612]; protein transport into membrane raft [GO:0032596]	Golgi apparatus [GO:0005794]; late endosome [GO:0005770]; membrane raft [GO:0045121]; plasma membrane [GO:0005886]	protein targeting to membrane [GO:0006612]; protein transport into membrane raft [GO:0032596]	oxidoreductase activity [GO:0016491]
COR1	856.3140326	494.4850628	0.792213026	5.61E-06	0.000191126	P07256	QCR1_YEAST	Cytochrome b-c1 complex subunit 1, mitochondrial (Complex III subunit 1) (Core protein I) (Ubiquinol-cytochrome-c reductase complex core protein 1)	COR1 QCR1 YBL045C YBL0403	457	mitochondrial respiratory chain complex III [GO:0005750]; mitochondrion [GO:0005739]; metalloendopeptidase activity [GO:0004222]; zinc ion binding [GO:0008270]; aerobic respiration [GO:0009060]; hydrogen ion transmembrane transport [GO:1902600]; mitochondrial electron transport, ubiquinol to cytochrome c [GO:0006122]; protein processing [GO:0016485]	mitochondrial respiratory chain complex III [GO:0005750]; mitochondrion [GO:0005739]	aerobic respiration [GO:0009060]; hydrogen ion transmembrane transport [GO:1902600]; mitochondrial electron transport, ubiquinol to cytochrome c [GO:0006122]; protein processing [GO:0016485]	metalloendopeptidase activity [GO:0004222]; zinc ion binding [GO:0008270]
RIB1	276.6185754	151.7299499	0.866392153	0.000445332	0.008731921	P38066	RIB1_YEAST	GTP cyclohydrolase-2 (EC 3.5.4.25) (GTP cyclohydrolase II)	RIB1 YBL033C YBL0417	345	cyclohydrolase activity [GO:0019238]; GTP binding [GO:0005525]; GTP cyclohydrolase II activity [GO:0003935]; identical protein binding [GO:0042802]; metal ion binding [GO:0046872]; riboflavin biosynthetic process [GO:0009231]		riboflavin biosynthetic process [GO:0009231]	cyclohydrolase activity [GO:0019238]; GTP binding [GO:0005525]; GTP cyclohydrolase II activity [GO:0003935]; identical protein binding [GO:0042802]; metal ion binding [GO:0046872]
UGA2	578.6893634	339.3990705	0.769806513	3.92E-05	0.001029351	P38067	UGA2_YEAST	Succinate-semialdehyde dehydrogenase [NADP(+)] (SSDH) (EC 1.2.1.16)	UGA2 UGA5 YBR006W YBR0112	497	mitochondrial matrix [GO:0005759]; mitochondrion [GO:0005739]; copper ion binding [GO:0005507]; NAD binding [GO:0051287]; succinate-semialdehyde dehydrogenase (NAD+) activity [GO:0004777]; succinate-semialdehyde dehydrogenase [NAD(P)+] activity [GO:0009013]; cellular response to oxidative stress [GO:0034599]; gamma-aminobutyric acid catabolic process [GO:0009450]; glutamate decarboxylation to suc…	mitochondrial matrix [GO:0005759]; mitochondrion [GO:0005739]	cellular response to oxidative stress [GO:0034599]; gamma-aminobutyric acid catabolic process [GO:0009450]; glutamate decarboxylation to succinate [GO:0006540]; reactive oxygen species metabolic process [GO:0072593]; response to heat [GO:0009408]; response to light stimulus [GO:0009416]	copper ion binding [GO:0005507]; NAD binding [GO:0051287]; succinate-semialdehyde dehydrogenase (NAD+) activity [GO:0004777]; succinate-semialdehyde dehydrogenase [NAD(P)+] activity [GO:0009013]
ATP3	910.5640321	577.340523	0.657337983	3.51E-05	0.00094126	P38077	ATPG_YEAST	ATP synthase subunit gamma, mitochondrial (F-ATPase gamma subunit)	ATP3 ATP3a ATP3b YBR039W YBR0408	311	mitochondrial proton-transporting ATP synthase, central stalk [GO:0005756]; proton-transporting ATP synthase activity, rotational mechanism [GO:0046933]; ATP synthesis coupled proton transport [GO:0015986]	mitochondrial proton-transporting ATP synthase, central stalk [GO:0005756]	ATP synthesis coupled proton transport [GO:0015986]	proton-transporting ATP synthase activity, rotational mechanism [GO:0046933]
YRO2	969.4361505	372.22074	1.380987438	2.60E-13	3.09E-11	P38079	YRO2_YEAST	Protein YRO2	YRO2 YBR054W YBR0507	344	integral component of membrane [GO:0016021]; plasma membrane [GO:0005886]; ion channel activity [GO:0005216]; negative regulation of ATPase activity [GO:0032780]	integral component of membrane [GO:0016021]; plasma membrane [GO:0005886]	negative regulation of ATPase activity [GO:0032780]	ion channel activity [GO:0005216]
PRP6	117.9803197	41.45124311	1.509058951	7.81E-05	0.001907392	P19735	PRP6_YEAST	Pre-mRNA-splicing factor 6	PRP6 RNA6 YBR055C YBR0508	899	catalytic step 2 spliceosome [GO:0071013]; U4/U6 snRNP [GO:0071001]; U4/U6 x U5 tri-snRNP complex [GO:0046540]; mRNA splicing, via spliceosome [GO:0000398]; spliceosomal tri-snRNP complex assembly [GO:0000244]	catalytic step 2 spliceosome [GO:0071013]; U4/U6 snRNP [GO:0071001]; U4/U6 x U5 tri-snRNP complex [GO:0046540]	mRNA splicing, via spliceosome [GO:0000398]; spliceosomal tri-snRNP complex assembly [GO:0000244]
HSP26	27689.782	8948.052505	1.629708068	8.42E-57	5.60E-53	P15992	HSP26_YEAST	Heat shock protein 26 (26 kDa heat shock protein)	HSP26 YBR072W YBR0714	214	cytoplasm [GO:0005737]; cytoplasmic stress granule [GO:0010494]; nucleus [GO:0005634]; mRNA binding [GO:0003729]; unfolded protein binding [GO:0051082]; cellular response to heat [GO:0034605]; protein folding [GO:0006457]	cytoplasm [GO:0005737]; cytoplasmic stress granule [GO:0010494]; nucleus [GO:0005634]	cellular response to heat [GO:0034605]; protein folding [GO:0006457]	mRNA binding [GO:0003729]; unfolded protein binding [GO:0051082]
YBR072C-A	921.5348309	347.3294888	1.407733793	4.41E-13	5.14E-11	Q3E794	YB072_YEAST	Uncharacterized protein YBR072C-A	YBR072C-A	53
UBC4	1442.552658	901.1131206	0.678843853	1.25E-06	5.02E-05	P15731	UBC4_YEAST	Ubiquitin-conjugating enzyme E2 4 (EC 2.3.2.23) (E2 ubiquitin-conjugating enzyme 4) (Ubiquitin carrier protein 4) (Ubiquitin-protein ligase 4)	UBC4 YBR082C YBR0745	148	proteasome complex [GO:0000502]; ATP binding [GO:0005524]; protein binding, bridging [GO:0030674]; ubiquitin binding [GO:0043130]; ubiquitin-protein transferase activity [GO:0004842]; cellular response to heat [GO:0034605]; protein monoubiquitination [GO:0006513]; protein polyubiquitination [GO:0000209]; protein ubiquitination [GO:0016567]; ubiquitin-dependent catabolism of misfolded proteins by …	proteasome complex [GO:0000502]	cellular response to heat [GO:0034605]; protein monoubiquitination [GO:0006513]; protein polyubiquitination [GO:0000209]; protein ubiquitination [GO:0016567]; ubiquitin-dependent catabolism of misfolded proteins by cytoplasm-associated proteasome [GO:0071629]; ubiquitin-dependent protein catabolic process via the multivesicular body sorting pathway [GO:0043162]	ATP binding [GO:0005524]; protein binding, bridging [GO:0030674]; ubiquitin binding [GO:0043130]; ubiquitin-protein transferase activity [GO:0004842]
YBR085C-A	1440.278324	1049.310127	0.456906495	0.000648019	0.011833477	O43137	YB085_YEAST	Uncharacterized protein YBR085C-A	YBR085C-A	85	cytoplasm [GO:0005737]; nucleus [GO:0005634]	cytoplasm [GO:0005737]; nucleus [GO:0005634]
FES1	1038.646246	397.6288729	1.385209944	1.79E-14	2.39E-12	P38260	FES1_YEAST	Hsp70 nucleotide exchange factor FES1 (Factor exchange for SSA1 protein 1)	FES1 YBR101C YBR0830	290	cytosol [GO:0005829]; adenyl-nucleotide exchange factor activity [GO:0000774]; regulation of translation [GO:0006417]; ubiquitin-dependent catabolism of misfolded proteins by cytoplasm-associated proteasome [GO:0071629]	cytosol [GO:0005829]	regulation of translation [GO:0006417]; ubiquitin-dependent catabolism of misfolded proteins by cytoplasm-associated proteasome [GO:0071629]	adenyl-nucleotide exchange factor activity [GO:0000774]
TEF2	7313.875233	5831.522645	0.326763387	0.002247881	0.032552645	P02994	EF1A_YEAST	Elongation factor 1-alpha (EF-1-alpha) (Eukaryotic elongation factor 1A) (eEF1A) (Translation elongation factor 1A)	TEF1 YPR080W P9513.7; TEF2 YBR118W YBR0913	458	cytoplasm [GO:0005737]; cytoskeleton [GO:0005856]; eukaryotic translation elongation factor 1 complex [GO:0005853]; fungal-type vacuole membrane [GO:0000329]; mitochondrion [GO:0005739]; ribosome [GO:0005840]; actin binding [GO:0003779]; GDP binding [GO:0019003]; GTP binding [GO:0005525]; GTPase activity [GO:0003924]; protein kinase binding [GO:0019901]; ribosome binding [GO:0043022]; translation…	cytoplasm [GO:0005737]; cytoskeleton [GO:0005856]; eukaryotic translation elongation factor 1 complex [GO:0005853]; fungal-type vacuole membrane [GO:0000329]; mitochondrion [GO:0005739]; ribosome [GO:0005840]	cellular response to amino acid starvation [GO:0034198]; negative regulation of protein kinase activity [GO:0006469]; negative regulation of protein phosphorylation [GO:0001933]; translational elongation [GO:0006414]; tRNA export from nucleus [GO:0006409]	actin binding [GO:0003779]; GDP binding [GO:0019003]; GTPase activity [GO:0003924]; GTP binding [GO:0005525]; protein kinase binding [GO:0019901]; ribosome binding [GO:0043022]; translation elongation factor activity [GO:0003746]
SSE2	623.5831149	177.8984884	1.809527612	1.06E-17	2.36E-15	P32590	HSP79_YEAST	Heat shock protein homolog SSE2	SSE2 HSP YBR169C YBR1221	693	adenyl-nucleotide exchange factor activity [GO:0000774]; ATP binding [GO:0005524]; calmodulin binding [GO:0005516]; protein folding [GO:0006457]; protein refolding [GO:0042026]		protein folding [GO:0006457]; protein refolding [GO:0042026]	adenyl-nucleotide exchange factor activity [GO:0000774]; ATP binding [GO:0005524]; calmodulin binding [GO:0005516]
EHT1	202.298135	118.7461949	0.768601735	0.003726435	0.047451366	P38295	MCFS2_YEAST	Medium-chain fatty acid ethyl ester synthase/esterase 2 (Alcohol O-acetyltransferase) (EC 2.3.1.84) (EC 3.1.1.-) (Ethanol hexanoyl transferase 1)	EHT1 YBR177C YBR1239	451	lipid particle [GO:0005811]; acylglycerol lipase activity [GO:0047372]; alcohol O-acetyltransferase activity [GO:0004026]; alcohol O-butanoyltransferase activity [GO:0034319]; short-chain carboxylesterase activity [GO:0034338]; cellular lipid metabolic process [GO:0044255]; medium-chain fatty acid biosynthetic process [GO:0051792]; medium-chain fatty acid catabolic process [GO:0051793]	lipid particle [GO:0005811]	cellular lipid metabolic process [GO:0044255]; medium-chain fatty acid biosynthetic process [GO:0051792]; medium-chain fatty acid catabolic process [GO:0051793]	acylglycerol lipase activity [GO:0047372]; alcohol O-acetyltransferase activity [GO:0004026]; alcohol O-butanoyltransferase activity [GO:0034319]; short-chain carboxylesterase activity [GO:0034338]
YBR201C-A	114.1739132	28.49291336	2.002558009	1.29E-06	5.14E-05	Q2V2Q3	YB201_YEAST	Putative uncharacterized protein YBR201C-A	YBR201C-A	67
YBR298C-A	106.0369881	36.73885211	1.529189141	0.000139589	0.003177564	Q8TGK4	YB298_YEAST	Uncharacterized protein YBR298C-A	YBR298C-A	73
HMLALPHA2	150.0229199	62.39915953	1.265584424	0.000124011	0.002902472	P0CY09	HMAL2_YEAST	Silenced mating-type protein ALPHA2 (MATalpha2 protein) (Alpha-2 repressor)	HMLALPHA2 YCL067C YCL67C	210	nucleus [GO:0005634]; DNA binding, bending [GO:0008301]; transcriptional repressor activity, RNA polymerase II transcription regulatory region sequence-specific binding [GO:0001227]; negative regulation of mating-type specific transcription from RNA polymerase II promoter [GO:0001198]; transcription, DNA-templated [GO:0006351]	nucleus [GO:0005634]	negative regulation of mating-type specific transcription from RNA polymerase II promoter [GO:0001198]; transcription, DNA-templated [GO:0006351]	DNA binding, bending [GO:0008301]; transcriptional repressor activity, RNA polymerase II transcription regulatory region sequence-specific binding [GO:0001227]
MOS1	879.5396663	611.6351725	0.524077271	0.000614033	0.011306038	Q96VH5	MIC10_YEAST	MICOS complex subunit MIC10 (Mitochondrial contact site complex 10 kDa subunit) (Mitochondrial inner membrane organization component of 10 kDa) (Mitochondrial organizing structure protein 1) (MitOS1)	MIC10 MCS10 MIO10 MOS1 YCL057C-A	97	MICOS complex [GO:0061617]; mitochondrial crista junction [GO:0044284]; mitochondrial inner membrane [GO:0005743]; cristae formation [GO:0042407]; membrane organization [GO:0061024]	MICOS complex [GO:0061617]; mitochondrial crista junction [GO:0044284]; mitochondrial inner membrane [GO:0005743]	cristae formation [GO:0042407]; membrane organization [GO:0061024]
SRO9	55.2427063	0	Inf	0.00300462	0.03994342	P25567	SRO9_YEAST	RNA-binding protein SRO9 (Suppressor of RHO3 protein 9)	SRO9 YCL037C YCL37C	434	cytoplasmic stress granule [GO:0010494]; polysome [GO:0005844]; RNA binding [GO:0003723]; cytoplasmic translation [GO:0002181]	cytoplasmic stress granule [GO:0010494]; polysome [GO:0005844]	cytoplasmic translation [GO:0002181]	RNA binding [GO:0003723]
YCL021W-A	463.6364581	206.9344357	1.163820275	2.29E-08	1.33E-06	Q96VH3	YC021_YEAST	Putative uncharacterized protein YCL021W-A	YCL021W-A	125	integral component of membrane [GO:0016021]	integral component of membrane [GO:0016021]
SAT4	257.8657314	134.600772	0.937933377	0.000183667	0.004069457	P25333	HAL4_YEAST	Serine/threonine-protein kinase HAL4/SAT4 (EC 2.7.11.1) (Halotolerance protein 4)	SAT4 HAL4 YCR008W YCR046 YCR101 YCR8W	603	cytoplasm [GO:0005737]; mitochondrion [GO:0005739]; nucleus [GO:0005634]; ATP binding [GO:0005524]; protein kinase activity [GO:0004672]; protein serine/threonine kinase activity [GO:0004674]; cellular cation homeostasis [GO:0030003]; cellular protein localization [GO:0034613]; G1/S transition of mitotic cell cycle [GO:0000082]; intracellular signal transduction [GO:0035556]; protein dephosphoryl…	cytoplasm [GO:0005737]; mitochondrion [GO:0005739]; nucleus [GO:0005634]	cellular cation homeostasis [GO:0030003]; cellular protein localization [GO:0034613]; G1/S transition of mitotic cell cycle [GO:0000082]; intracellular signal transduction [GO:0035556]; protein dephosphorylation [GO:0006470]; protein lipoylation [GO:0009249]; regulation of iron-sulfur cluster assembly [GO:1903329]	ATP binding [GO:0005524]; protein kinase activity [GO:0004672]; protein serine/threonine kinase activity [GO:0004674]
RVS161	383.2575046	181.4350182	1.078861109	7.03E-07	2.96E-05	P25343	RV161_YEAST	Reduced viability upon starvation protein 161	RVS161 END6 SPE161 YCR009C YCR9C	265	actin cortical patch [GO:0030479]; mating projection [GO:0005937]; membrane raft [GO:0045121]; Rvs161p-Rvs167p complex [GO:1990528]; cytoskeletal protein binding [GO:0008092]; actin cortical patch localization [GO:0051666]; actin cytoskeleton organization [GO:0030036]; actin cytoskeleton reorganization [GO:0031532]; conjugation with cellular fusion [GO:0000747]; endocytosis [GO:0006897]; lipid tu…	actin cortical patch [GO:0030479]; mating projection [GO:0005937]; membrane raft [GO:0045121]; Rvs161p-Rvs167p complex [GO:1990528]	actin cortical patch localization [GO:0051666]; actin cytoskeleton organization [GO:0030036]; actin cytoskeleton reorganization [GO:0031532]; conjugation with cellular fusion [GO:0000747]; endocytosis [GO:0006897]; lipid tube assembly [GO:0060988]; plasma membrane tubulation [GO:0097320]; response to osmotic stress [GO:0006970]; response to starvation [GO:0042594]	cytoskeletal protein binding [GO:0008092]
HSP30	5007.801477	1423.78154	1.81444957	1.14E-24	8.43E-22	P25619	HSP30_YEAST	30 kDa heat shock protein	HSP30 YCR021C YCR21C	332	integral component of membrane [GO:0016021]; plasma membrane [GO:0005886]; ion channel activity [GO:0005216]; cellular response to DNA damage stimulus [GO:0006974]; cellular response to ethanol [GO:0071361]; cellular response to heat [GO:0034605]; cellular response to hydrogen peroxide [GO:0070301]; cellular response to osmotic stress [GO:0071470]; negative regulation of ATPase activity [GO:00327…	integral component of membrane [GO:0016021]; plasma membrane [GO:0005886]	cellular response to DNA damage stimulus [GO:0006974]; cellular response to ethanol [GO:0071361]; cellular response to heat [GO:0034605]; cellular response to hydrogen peroxide [GO:0070301]; cellular response to osmotic stress [GO:0071470]; negative regulation of ATPase activity [GO:0032780]	ion channel activity [GO:0005216]
MATALPHA2	326.9879104	198.5612141	0.719653455	0.000743004	0.013169998	P0CY08	MTAL2_YEAST	Mating-type protein ALPHA2 (MATalpha2 protein) (Alpha-2 repressor)	MATALPHA2 ALPHA-2 MAT2A MATAL2 YCR039C YCR39C	210	nucleus [GO:0005634]; DNA binding, bending [GO:0008301]; sequence-specific DNA binding [GO:0043565]; transcriptional repressor activity, RNA polymerase II transcription regulatory region sequence-specific binding [GO:0001227]; negative regulation of mating-type specific transcription from RNA polymerase II promoter [GO:0001198]; transcription, DNA-templated [GO:0006351]	nucleus [GO:0005634]	negative regulation of mating-type specific transcription from RNA polymerase II promoter [GO:0001198]; transcription, DNA-templated [GO:0006351]	DNA binding, bending [GO:0008301]; sequence-specific DNA binding [GO:0043565]; transcriptional repressor activity, RNA polymerase II transcription regulatory region sequence-specific binding [GO:0001227]
HMRA2	148.1414051	76.75788189	0.948588119	0.002336403	0.033469982	P0CY13	HMRA2_YEAST	Silenced mating-type protein A2 (MATa2 protein)	HMRA2 YCR096C YCR96C	119	nucleus [GO:0005634]; DNA binding [GO:0003677]	nucleus [GO:0005634]		DNA binding [GO:0003677]
THI13	432.2893398	141.1596363	1.614669642	8.93E-13	9.73E-11	Q07748	THI13_YEAST	4-amino-5-hydroxymethyl-2-methylpyrimidine phosphate synthase THI13 (HMP-P synthase) (Hydroxymethylpyrimidine phosphate synthase) (Thiamine biosynthesis protein 13) (Thiamine pyrimidine synthase)	THI13 YDL244W	340	thiamine biosynthetic process [GO:0009228]; thiamine diphosphate biosynthetic process [GO:0009229]		thiamine biosynthetic process [GO:0009228]; thiamine diphosphate biosynthetic process [GO:0009229]
YDL180W	161.9217124	70.93028907	1.19082272	0.000165988	0.003727437	Q12301	YD180_YEAST	Uncharacterized membrane protein YDL180W	YDL180W	547	integral component of membrane [GO:0016021]; vacuolar membrane [GO:0005774]	integral component of membrane [GO:0016021]; vacuolar membrane [GO:0005774]
SFA1	431.4459622	191.3362106	1.173069944	2.57E-08	1.49E-06	P32771	FADH_YEAST	S-(hydroxymethyl)glutathione dehydrogenase (EC 1.1.1.284) (Alcohol dehydrogenase SFA) (EC 1.1.1.1) (Glutathione-dependent formaldehyde dehydrogenase) (FALDH) (FDH) (FLD) (GSH-FDH) (EC 1.1.1.-)	SFA1 SFA YDL168W	386	alcohol dehydrogenase (NAD) activity [GO:0004022]; hydroxymethylfurfural reductase (NADH) activity [GO:0033833]; S-(hydroxymethyl)glutathione dehydrogenase activity [GO:0051903]; zinc ion binding [GO:0008270]; amino acid catabolic process to alcohol via Ehrlich pathway [GO:0000947]; ethanol oxidation [GO:0006069]; formaldehyde catabolic process [GO:0046294]; furaldehyde metabolic process [GO:0033…		amino acid catabolic process to alcohol via Ehrlich pathway [GO:0000947]; ethanol oxidation [GO:0006069]; formaldehyde catabolic process [GO:0046294]; furaldehyde metabolic process [GO:0033859]	alcohol dehydrogenase (NAD) activity [GO:0004022]; hydroxymethylfurfural reductase (NADH) activity [GO:0033833]; S-(hydroxymethyl)glutathione dehydrogenase activity [GO:0051903]; zinc ion binding [GO:0008270]
SAS10	43.01786131	0	Inf	0.002160084	0.031556213	Q12136	SAS10_YEAST	Something about silencing protein 10 (U three protein 3) (U3 small nucleolar RNA-associated protein 3) (U3 snoRNA-associated protein 11)	SAS10 UTP3 YDL153C D1545	610	nucleolus [GO:0005730]; nucleoplasm [GO:0005654]; nucleus [GO:0005634]; small-subunit processome [GO:0032040]; cell cycle [GO:0007049]; endonucleolytic cleavage in 5'-ETS of tricistronic rRNA transcript (SSU-rRNA, 5.8S rRNA, LSU-rRNA) [GO:0000480]; endonucleolytic cleavage in ITS1 to separate SSU-rRNA from 5.8S rRNA and LSU-rRNA from tricistronic rRNA transcript (SSU-rRNA, 5.8S rRNA, LSU-rRNA) [G…	nucleolus [GO:0005730]; nucleoplasm [GO:0005654]; nucleus [GO:0005634]; small-subunit processome [GO:0032040]	cell cycle [GO:0007049]; endonucleolytic cleavage in 5'-ETS of tricistronic rRNA transcript (SSU-rRNA, 5.8S rRNA, LSU-rRNA) [GO:0000480]; endonucleolytic cleavage in ITS1 to separate SSU-rRNA from 5.8S rRNA and LSU-rRNA from tricistronic rRNA transcript (SSU-rRNA, 5.8S rRNA, LSU-rRNA) [GO:0000447]; endonucleolytic cleavage to generate mature 5'-end of SSU-rRNA from (SSU-rRNA, 5.8S rRNA, LSU-rRNA)…
YDL129W	45.94081337	0	Inf	5.83E-06	0.000197554	Q07555	YD129_YEAST	Uncharacterized protein YDL129W	YDL129W	291	cytoplasm [GO:0005737]; nucleus [GO:0005634]	cytoplasm [GO:0005737]; nucleus [GO:0005634]
YDL068W	71.36749851	0	Inf	7.45E-06	0.000239231	Q07435	YD068_YEAST	Putative uncharacterized protein YDL068W	YDL068W	109	integral component of membrane [GO:0016021]	integral component of membrane [GO:0016021]
SIT4	138.9140412	61.25362799	1.181325231	0.000407581	0.00811136	P20604	PP11_YEAST	Serine/threonine-protein phosphatase PP1-1 (EC 3.1.3.16)	SIT4 PPH1 YDL047W D2693	311	cytoplasm [GO:0005737]; protein phosphatase type 2A complex [GO:0000159]; metal ion binding [GO:0046872]; protein serine/threonine phosphatase activity [GO:0004722]; actin cytoskeleton organization [GO:0030036]; cell division [GO:0051301]; cellular response to oxidative stress [GO:0034599]; dephosphorylation [GO:0016311]; DNA repair [GO:0006281]; fungal-type cell wall organization [GO:0031505]; G…	cytoplasm [GO:0005737]; protein phosphatase type 2A complex [GO:0000159]	actin cytoskeleton organization [GO:0030036]; cell division [GO:0051301]; cellular response to oxidative stress [GO:0034599]; dephosphorylation [GO:0016311]; DNA repair [GO:0006281]; fungal-type cell wall organization [GO:0031505]; G1/S transition of mitotic cell cycle [GO:0000082]; intracellular signal transduction [GO:0035556]; peptidyl-serine dephosphorylation [GO:0070262]; replicative cell ag…	metal ion binding [GO:0046872]; protein serine/threonine phosphatase activity [GO:0004722]
RTK1	272.3325959	137.4333779	0.986637243	9.44E-05	0.002265125	Q12100	RTK1_YEAST	Probable serine/threonine-protein kinase RTK1 (EC 2.7.11.1) (Ribosome biogenesis and tRNA synthetase-associated kinase 1)	RTK1 YDL025C D2810	620	cytoplasm [GO:0005737]; nucleus [GO:0005634]; ATP binding [GO:0005524]; protein kinase activity [GO:0004672]; protein serine/threonine kinase activity [GO:0004674]; intracellular signal transduction [GO:0035556]; protein phosphorylation [GO:0006468]	cytoplasm [GO:0005737]; nucleus [GO:0005634]	intracellular signal transduction [GO:0035556]; protein phosphorylation [GO:0006468]	ATP binding [GO:0005524]; protein kinase activity [GO:0004672]; protein serine/threonine kinase activity [GO:0004674]
ATP16	545.9926047	274.0444952	0.994471255	3.90E-07	1.77E-05	Q12165	ATPD_YEAST	ATP synthase subunit delta, mitochondrial (F-ATPase delta subunit)	ATP16 YDL004W D2935 YD8119.03	160	mitochondrial proton-transporting ATP synthase, central stalk [GO:0005756]; proton-transporting ATP synthase activity, rotational mechanism [GO:0046933]; ATP synthesis coupled proton transport [GO:0015986]	mitochondrial proton-transporting ATP synthase, central stalk [GO:0005756]	ATP synthesis coupled proton transport [GO:0015986]	proton-transporting ATP synthase activity, rotational mechanism [GO:0046933]
GCV1	264.1077548	144.6325247	0.868734644	0.000478353	0.009189636	P48015	GCST_YEAST	Aminomethyltransferase, mitochondrial (EC 2.1.2.10) (Glycine cleavage system T protein) (GCVT) (Glycine decarboxylase complex subunit T)	GCV1 YDR019C YD9335.05C	400	glycine cleavage complex [GO:0005960]; mitochondrion [GO:0005739]; aminomethyltransferase activity [GO:0004047]; transaminase activity [GO:0008483]; glycine catabolic process [GO:0006546]; glycine metabolic process [GO:0006544]; one-carbon metabolic process [GO:0006730]; oxidation-reduction process [GO:0055114]	glycine cleavage complex [GO:0005960]; mitochondrion [GO:0005739]	glycine catabolic process [GO:0006546]; glycine metabolic process [GO:0006544]; one-carbon metabolic process [GO:0006730]; oxidation-reduction process [GO:0055114]	aminomethyltransferase activity [GO:0004047]; transaminase activity [GO:0008483]
DOS2	131.5771168	62.20793987	1.08073797	0.00116682	0.019293164	P54858	DOS2_YEAST	Protein DOS2	DOS2 YDR068W D4267 YD8554.01 YD9609.22	310
CTH1	151.5383054	57.33614993	1.402165582	2.86E-05	0.000795018	P47976	CTH1_YEAST	mRNA decay factor CTH1 (Cysteine-three-histidine protein 1)	CTH1 YDR151C YD8358.07C	325	cytosol [GO:0005829]; nucleus [GO:0005634]; metal ion binding [GO:0046872]; mRNA 3'-UTR binding [GO:0003730]; mRNA binding [GO:0003729]; 3'-UTR-mediated mRNA destabilization [GO:0061158]; cellular iron ion homeostasis [GO:0006879]; nuclear-transcribed mRNA catabolic process [GO:0000956]	cytosol [GO:0005829]; nucleus [GO:0005634]	3'-UTR-mediated mRNA destabilization [GO:0061158]; cellular iron ion homeostasis [GO:0006879]; nuclear-transcribed mRNA catabolic process [GO:0000956]	metal ion binding [GO:0046872]; mRNA 3'-UTR binding [GO:0003730]; mRNA binding [GO:0003729]
GIR2	329.3032966	150.2644248	1.131913464	1.81E-06	6.80E-05	Q03768	GIR2_YEAST	Protein GIR2 (DRG family-regulatory protein 2) (Genetically interacts with ribosomal genes protein 2)	GIR2 DFRP2 YDR152W YD8358.08	265	polysome [GO:0005844]; protein kinase inhibitor activity [GO:0004860]; cellular response to amino acid starvation [GO:0034198]; cytoplasmic translation [GO:0002181]; negative regulation of protein complex assembly [GO:0031333]; negative regulation of protein phosphorylation [GO:0001933]; positive regulation of cellular response to amino acid starvation [GO:1903833]	polysome [GO:0005844]	cellular response to amino acid starvation [GO:0034198]; cytoplasmic translation [GO:0002181]; negative regulation of protein complex assembly [GO:0031333]; negative regulation of protein phosphorylation [GO:0001933]; positive regulation of cellular response to amino acid starvation [GO:1903833]	protein kinase inhibitor activity [GO:0004860]
HSP42	1944.901987	803.8953652	1.274617814	8.53E-15	1.26E-12	Q12329	HSP42_YEAST	Heat shock protein 42 (42 kDa heat shock protein)	HSP42 YDR171W YD9395.04	375	cytoskeleton [GO:0005856]; unfolded protein binding [GO:0051082]; cytoskeleton organization [GO:0007010]	cytoskeleton [GO:0005856]	cytoskeleton organization [GO:0007010]	unfolded protein binding [GO:0051082]
SDH4	519.0695458	343.6638898	0.594929576	0.001082298	0.018030162	P37298	DHSD_YEAST	Succinate dehydrogenase [ubiquinone] cytochrome b small subunit, mitochondrial (CybS) (Succinate-ubiquinone reductase membrane anchor subunit)	SDH4 ACN18 YDR178W YD9395.11	181	integral component of membrane [GO:0016021]; mitochondrial inner membrane [GO:0005743]; mitochondrial respiratory chain complex II, succinate dehydrogenase complex (ubiquinone) [GO:0005749]; heme binding [GO:0020037]; metal ion binding [GO:0046872]; ubiquinone binding [GO:0048039]; cellular respiration [GO:0045333]; mitochondrial electron transport, succinate to ubiquinone [GO:0006121]; tricarbox…	integral component of membrane [GO:0016021]; mitochondrial inner membrane [GO:0005743]; mitochondrial respiratory chain complex II, succinate dehydrogenase complex (ubiquinone) [GO:0005749]	cellular respiration [GO:0045333]; mitochondrial electron transport, succinate to ubiquinone [GO:0006121]; tricarboxylic acid cycle [GO:0006099]	heme binding [GO:0020037]; metal ion binding [GO:0046872]; ubiquinone binding [GO:0048039]
RAV2	228.1153147	120.1510605	0.924913924	0.000332299	0.00677851	Q03956	RAV2_YEAST	Regulator of V-ATPase in vacuolar membrane protein 2	RAV2 YDR202C YD9346.12C	351	early endosome membrane [GO:0031901]; RAVE complex [GO:0043291]; protein transport [GO:0015031]; regulation of protein complex assembly [GO:0043254]; vacuolar acidification [GO:0007035]	early endosome membrane [GO:0031901]; RAVE complex [GO:0043291]	protein transport [GO:0015031]; regulation of protein complex assembly [GO:0043254]; vacuolar acidification [GO:0007035]
AHA1	399.1663879	145.3608142	1.457351837	1.70E-10	1.36E-08	Q12449	AHA1_YEAST	Hsp90 co-chaperone AHA1 (Activator of Hsp90 ATPase protein 1)	AHA1 YDR214W YD8142.16 YD8142B.06	350	cytoplasm [GO:0005737]; ATPase activator activity [GO:0001671]; chaperone binding [GO:0051087]; cellular response to heat [GO:0034605]; protein folding [GO:0006457]	cytoplasm [GO:0005737]	cellular response to heat [GO:0034605]; protein folding [GO:0006457]	ATPase activator activity [GO:0001671]; chaperone binding [GO:0051087]
VHS1	116.3503284	37.63101357	1.628481229	5.00E-05	0.001279243	Q03785	VHS1_YEAST	Serine/threonine-protein kinase VHS1 (EC 2.7.11.1) (Viable in a HAL3 SIT4 background protein 1)	VHS1 YDR247W YD8419.14	461	cytoplasm [GO:0005737]; nucleus [GO:0005634]; ATP binding [GO:0005524]; protein kinase activity [GO:0004672]; protein serine/threonine kinase activity [GO:0004674]; G1/S transition of mitotic cell cycle [GO:0000082]; intracellular signal transduction [GO:0035556]; protein phosphorylation [GO:0006468]	cytoplasm [GO:0005737]; nucleus [GO:0005634]	G1/S transition of mitotic cell cycle [GO:0000082]; intracellular signal transduction [GO:0035556]; protein phosphorylation [GO:0006468]	ATP binding [GO:0005524]; protein kinase activity [GO:0004672]; protein serine/threonine kinase activity [GO:0004674]
YDR250C	28.37962706	0	Inf	0.000554384	0.010480575	Q03788	YD250_YEAST	Putative uncharacterized protein YDR250C	YDR250C	91	integral component of membrane [GO:0016021]	integral component of membrane [GO:0016021]
HSP78	607.215995	300.0236005	1.017133803	1.47E-07	6.98E-06	P33416	HSP78_YEAST	Heat shock protein 78, mitochondrial	HSP78 YDR258C YD9320A.08C	811	mitochondrial matrix [GO:0005759]; ATP binding [GO:0005524]; ATPase activity [GO:0016887]; misfolded protein binding [GO:0051787]; cellular response to heat [GO:0034605]; mitochondrial genome maintenance [GO:0000002]; protein refolding [GO:0042026]; protein stabilization [GO:0050821]; protein unfolding [GO:0043335]	mitochondrial matrix [GO:0005759]	cellular response to heat [GO:0034605]; mitochondrial genome maintenance [GO:0000002]; protein refolding [GO:0042026]; protein stabilization [GO:0050821]; protein unfolding [GO:0043335]	ATPase activity [GO:0016887]; ATP binding [GO:0005524]; misfolded protein binding [GO:0051787]
MTH1	332.5122243	121.8033322	1.448853779	6.37E-09	3.99E-07	P35198	MTH1_YEAST	Protein MTH1	MTH1 YDR277C D9954.12	433	glucose transport [GO:0015758]; signal transduction [GO:0007165]		glucose transport [GO:0015758]; signal transduction [GO:0007165]
HXT7	1223.304203	517.6208298	1.240815628	1.37E-14	1.86E-12	P39004	HXT7_YEAST	High-affinity hexose transporter HXT7	HXT7 YDR342C D9651.11	570	integral component of membrane [GO:0016021]; plasma membrane [GO:0005886]; fructose transmembrane transporter activity [GO:0005353]; glucose transmembrane transporter activity [GO:0005355]; mannose transmembrane transporter activity [GO:0015578]; pentose transmembrane transporter activity [GO:0015146]; sugar:proton symporter activity [GO:0005351]; glucose import [GO:0046323]; hexose transport [GO…	integral component of membrane [GO:0016021]; plasma membrane [GO:0005886]	glucose import [GO:0046323]; hexose transport [GO:0008645]; transmembrane transport [GO:0055085]	fructose transmembrane transporter activity [GO:0005353]; glucose transmembrane transporter activity [GO:0005355]; mannose transmembrane transporter activity [GO:0015578]; pentose transmembrane transporter activity [GO:0015146]; sugar:proton symporter activity [GO:0005351]
HXT6	3783.423794	960.8081526	1.977372089	1.03E-23	6.83E-21	P39003	HXT6_YEAST	High-affinity hexose transporter HXT6	HXT6 YDR343C D9651.12	570	integral component of membrane [GO:0016021]; plasma membrane [GO:0005886]; fructose transmembrane transporter activity [GO:0005353]; glucose transmembrane transporter activity [GO:0005355]; mannose transmembrane transporter activity [GO:0015578]; sugar:proton symporter activity [GO:0005351]; glucose import [GO:0046323]; hexose transport [GO:0008645]; transmembrane transport [GO:0055085]	integral component of membrane [GO:0016021]; plasma membrane [GO:0005886]	glucose import [GO:0046323]; hexose transport [GO:0008645]; transmembrane transport [GO:0055085]	fructose transmembrane transporter activity [GO:0005353]; glucose transmembrane transporter activity [GO:0005355]; mannose transmembrane transporter activity [GO:0015578]; sugar:proton symporter activity [GO:0005351]
TRR1	299.1522983	188.0197393	0.669996016	0.002475837	0.034646085	P29509	TRXB1_YEAST	Thioredoxin reductase 1 (EC 1.8.1.9)	TRR1 YDR353W D9476.5	319	cytosol [GO:0005829]; mitochondrial intermembrane space [GO:0005758]; ferrous iron binding [GO:0008198]; thioredoxin-disulfide reductase activity [GO:0004791]; cell redox homeostasis [GO:0045454]; cellular response to oxidative stress [GO:0034599]; removal of superoxide radicals [GO:0019430]	cytosol [GO:0005829]; mitochondrial intermembrane space [GO:0005758]	cell redox homeostasis [GO:0045454]; cellular response to oxidative stress [GO:0034599]; removal of superoxide radicals [GO:0019430]	ferrous iron binding [GO:0008198]; thioredoxin-disulfide reductase activity [GO:0004791]
ATP17	600.792515	398.3937515	0.592671819	0.001023841	0.017229035	Q06405	ATPK_YEAST	ATP synthase subunit f, mitochondrial	ATP17 YDR377W D9481.21	101	mitochondrial proton-transporting ATP synthase complex, coupling factor F(o) [GO:0000276]; ATP hydrolysis coupled cation transmembrane transport [GO:0099132]; ATP synthesis coupled proton transport [GO:0015986]	mitochondrial proton-transporting ATP synthase complex, coupling factor F(o) [GO:0000276]	ATP hydrolysis coupled cation transmembrane transport [GO:0099132]; ATP synthesis coupled proton transport [GO:0015986]
YDR391C	157.3942965	76.53185954	1.040250903	0.000849602	0.014861323	Q04170	YD391_YEAST	Uncharacterized protein YDR391C	YDR391C	232	cytoplasm [GO:0005737]; nucleus [GO:0005634]	cytoplasm [GO:0005737]; nucleus [GO:0005634]
TSA2	178.4414615	89.46135056	0.996114426	0.000475498	0.00918789	Q04120	TSA2_YEAST	Peroxiredoxin TSA2 (EC 1.11.1.15) (Cytoplasmic thiol peroxidase 2) (cTPx 2) (Thiol-specific antioxidant protein 2) (Thioredoxin peroxidase 2)	TSA2 YDR453C D9461.38	196	cytoplasm [GO:0005737]; peroxiredoxin activity [GO:0051920]; thioredoxin peroxidase activity [GO:0008379]; cell redox homeostasis [GO:0045454]; cellular response to oxidative stress [GO:0034599]; protein folding [GO:0006457]; protein stabilization [GO:0050821]	cytoplasm [GO:0005737]	cell redox homeostasis [GO:0045454]; cellular response to oxidative stress [GO:0034599]; protein folding [GO:0006457]; protein stabilization [GO:0050821]	peroxiredoxin activity [GO:0051920]; thioredoxin peroxidase activity [GO:0008379]
STP1	299.5618045	187.9923915	0.672179411	0.002366825	0.033643027	Q00947	STP1_YEAST	Transcription factor STP1	STP1 BAP1 SSY2 YDR463W D8035.7	519	cytoplasm [GO:0005737]; nucleus [GO:0005634]; plasma membrane [GO:0005886]; metal ion binding [GO:0046872]; RNA polymerase II core promoter proximal region sequence-specific DNA binding [GO:0000978]; transcriptional activator activity, RNA polymerase II core promoter proximal region sequence-specific binding [GO:0001077]; positive regulation of transcription from RNA polymerase II promoter [GO:00…	cytoplasm [GO:0005737]; nucleus [GO:0005634]; plasma membrane [GO:0005886]	positive regulation of transcription, DNA-templated [GO:0045893]; positive regulation of transcription from RNA polymerase II promoter [GO:0045944]; tRNA processing [GO:0008033]	metal ion binding [GO:0046872]; RNA polymerase II core promoter proximal region sequence-specific DNA binding [GO:0000978]; transcriptional activator activity, RNA polymerase II core promoter proximal region sequence-specific binding [GO:0001077]
JIP4	159.359265	62.17611917	1.357850423	2.95E-05	0.000815847	Q03361	JIP4_YEAST	Uncharacterized protein JIP4 (Jumonji-interacting protein 4)	JIP4 YDR475C YDR474C	876
SNM1	57.25221403	0	Inf	0.00039526	0.007889778	P30620	RMRP_YEAST	Ribonuclease MRP protein subunit SNM1 (RNA-processing protein SNM1) (RNase MRP 22.5 kDa subunit)	SNM1 YDR478W D8035.21	198	nucleolar ribonuclease P complex [GO:0005655]; ribonuclease MRP complex [GO:0000172]; nuclease activity [GO:0004518]; rRNA primary transcript binding [GO:0042134]; mRNA processing [GO:0006397]; plasmid partitioning [GO:0030541]; RNA phosphodiester bond hydrolysis, endonucleolytic [GO:0090502]; rRNA processing [GO:0006364]; tRNA processing [GO:0008033]	nucleolar ribonuclease P complex [GO:0005655]; ribonuclease MRP complex [GO:0000172]	mRNA processing [GO:0006397]; plasmid partitioning [GO:0030541]; RNA phosphodiester bond hydrolysis, endonucleolytic [GO:0090502]; rRNA processing [GO:0006364]; tRNA processing [GO:0008033]	nuclease activity [GO:0004518]; rRNA primary transcript binding [GO:0042134]
EMI2	214.5764438	106.6178762	1.009042357	0.000216056	0.004677933	P40993	EMI2_YEAST	Putative glucokinase-2 (EC 2.7.1.2) (Early meiotic induction protein 2) (Glucose kinase 2) (GLK-2)	EMI2 YDR516C D9719.21	500	cytosol [GO:0005829]; ATP binding [GO:0005524]; fructokinase activity [GO:0008865]; glucokinase activity [GO:0004340]; glucose binding [GO:0005536]; mannokinase activity [GO:0019158]; cellular glucose homeostasis [GO:0001678]; glycolytic process [GO:0006096]; sporulation resulting in formation of a cellular spore [GO:0030435]	cytosol [GO:0005829]	cellular glucose homeostasis [GO:0001678]; glycolytic process [GO:0006096]; sporulation resulting in formation of a cellular spore [GO:0030435]	ATP binding [GO:0005524]; fructokinase activity [GO:0008865]; glucokinase activity [GO:0004340]; glucose binding [GO:0005536]; mannokinase activity [GO:0019158]
YDR524W-C	57.41019678	0	Inf	0.002425784	0.034156518	Q04409	YD24C_YEAST	Uncharacterized protein YDR524W-C	YDR524W-C YDR524W-A	29
YDR524C-B	3866.336903	2841.226571	0.444453474	0.000958578	0.016421823	P0C1Z1	YD24B_YEAST	Uncharacterized protein YDR524C-B	YDR524C-B	66	anchored component of membrane [GO:0031225]; plasma membrane [GO:0005886]	anchored component of membrane [GO:0031225]; plasma membrane [GO:0005886]
YDR524C-A	1130.916313	629.6475658	0.844875739	2.66E-08	1.51E-06	Q3E6R4	YD24A_YEAST	Putative uncharacterized protein YDR524C-A	YDR524C-A YDR524C-C	39
RBA50	192.3197718	87.48580798	1.136386184	7.24E-05	0.0017952	Q8TGR6	RBA50_YEAST	RNA polymerase II-associated protein RBA50 (RNA polymerase II-associated protein of 50 kDa)	RBA50 YDR527W	439	cytoplasm [GO:0005737]; nucleus [GO:0005634]; regulation of transcription, DNA-templated [GO:0006355]; transcription from RNA polymerase II promoter [GO:0006366]	cytoplasm [GO:0005737]; nucleus [GO:0005634]	regulation of transcription, DNA-templated [GO:0006355]; transcription from RNA polymerase II promoter [GO:0006366]
QCR7	2099.168756	1035.980091	1.018821874	4.30E-10	3.25E-08	Q04418	QCR7_YEAST	Cytochrome b-c1 complex subunit 7 (Complex III subunit 7) (Complex III subunit VII) (Ubiquinol-cytochrome c reductase c reductase complex 14 kDa protein)	QCR7 CRO1 UCR7 YDR529C D9719.32	127	mitochondrial respiratory chain complex III [GO:0005750]; aerobic respiration [GO:0009060]; hydrogen ion transmembrane transport [GO:1902600]; mitochondrial electron transport, ubiquinol to cytochrome c [GO:0006122]; mitochondrial respiratory chain complex III assembly [GO:0034551]	mitochondrial respiratory chain complex III [GO:0005750]	aerobic respiration [GO:0009060]; hydrogen ion transmembrane transport [GO:1902600]; mitochondrial electron transport, ubiquinol to cytochrome c [GO:0006122]; mitochondrial respiratory chain complex III assembly [GO:0034551]
APA2	365.8287735	180.4792153	1.019335852	3.30E-06	0.000118487	P00128	APA2_YEAST	Diadenosine 5',5'''-P1,P4-tetraphosphate phosphorylase 2 (Ap4A phosphorylase 2) (EC 2.7.7.53) (ADP-sulfurylase) (EC 2.7.7.5) (ATP adenylyltransferase)	APA2 YDR530C D9719.33	325	cytoplasm [GO:0005737]; nucleus [GO:0005634]; ATP adenylyltransferase activity [GO:0003877]; ATP binding [GO:0005524]; bis(5'-nucleosyl)-tetraphosphatase activity [GO:0008796]; sulfate adenylyltransferase (ADP) activity [GO:0004780]; nucleoside catabolic process [GO:0009164]; nucleotide metabolic process [GO:0009117]	cytoplasm [GO:0005737]; nucleus [GO:0005634]	nucleoside catabolic process [GO:0009164]; nucleotide metabolic process [GO:0009117]	ATP adenylyltransferase activity [GO:0003877]; ATP binding [GO:0005524]; bis(5'-nucleosyl)-tetraphosphatase activity [GO:0008796]; sulfate adenylyltransferase (ADP) activity [GO:0004780]
HSP31	497.688566	303.5523799	0.713297758	0.000161773	0.003645108	P22108	HSP31_YEAST	Glutathione-independent glyoxalase HSP31 (EC 4.2.1.130) (Glyoxalase 3 homolog 1) (Heat shock protein 31)	HSP31 YDR533C D9719.36	237	cytoplasmic stress granule [GO:0010494]; P-body [GO:0000932]; glyoxalase III activity [GO:0019172]; cellular response to nutrient levels [GO:0031669]; cellular response to oxidative stress [GO:0034599]; methylglyoxal catabolic process to D-lactate via S-lactoyl-glutathione [GO:0019243]	cytoplasmic stress granule [GO:0010494]; P-body [GO:0000932]	cellular response to nutrient levels [GO:0031669]; cellular response to oxidative stress [GO:0034599]; methylglyoxal catabolic process to D-lactate via S-lactoyl-glutathione [GO:0019243]	glyoxalase III activity [GO:0019172]
CYC7	368.6136457	67.20403067	2.45548981	4.81E-19	1.45E-16	Q04432	CYC7_YEAST	Cytochrome c iso-2	CYC7 CYP3 YEL039C	113	mitochondrial intermembrane space [GO:0005758]; respiratory chain [GO:0070469]; electron carrier activity [GO:0009055]; heme binding [GO:0020037]; metal ion binding [GO:0046872]; mitochondrial electron transport, cytochrome c to oxygen [GO:0006123]; mitochondrial electron transport, ubiquinol to cytochrome c [GO:0006122]	mitochondrial intermembrane space [GO:0005758]; respiratory chain [GO:0070469]	mitochondrial electron transport, cytochrome c to oxygen [GO:0006123]; mitochondrial electron transport, ubiquinol to cytochrome c [GO:0006122]	electron carrier activity [GO:0009055]; heme binding [GO:0020037]; metal ion binding [GO:0046872]
RIP1	430.8327717	217.4045187	0.986746067	1.39E-06	5.48E-05	P00045	UCRI_YEAST	Cytochrome b-c1 complex subunit Rieske, mitochondrial (EC 1.10.2.2) (Complex III subunit 5) (Rieske iron-sulfur protein) (RISP) (Ubiquinol-cytochrome c reductase iron-sulfur subunit)	RIP1 YEL024W	215	mitochondrial respiratory chain complex III [GO:0005750]; mitochondrion [GO:0005739]; 2 iron, 2 sulfur cluster binding [GO:0051537]; metal ion binding [GO:0046872]; ubiquinol-cytochrome-c reductase activity [GO:0008121]; aerobic respiration [GO:0009060]; mitochondrial electron transport, ubiquinol to cytochrome c [GO:0006122]	mitochondrial respiratory chain complex III [GO:0005750]; mitochondrion [GO:0005739]	aerobic respiration [GO:0009060]; mitochondrial electron transport, ubiquinol to cytochrome c [GO:0006122]	2 iron, 2 sulfur cluster binding [GO:0051537]; metal ion binding [GO:0046872]; ubiquinol-cytochrome-c reductase activity [GO:0008121]
ARB1	318.5204704	204.7028364	0.637855001	0.002326268	0.033413967	P08067	DEF1_YEAST	Nucleoporin NUP42 (Nuclear pore protein NUP42)	ARB1 YER036C	610	cytoplasm [GO:0005737]; nucleus [GO:0005634]; ATP binding [GO:0005524]; ATPase activity, uncoupled [GO:0042624]; ribosomal small subunit export from nucleus [GO:0000056]; ribosome biogenesis [GO:0042254]	cytoplasm [GO:0005737]; nucleus [GO:0005634]	ribosomal small subunit export from nucleus [GO:0000056]; ribosome biogenesis [GO:0042254]	ATPase activity, uncoupled [GO:0042624]; ATP binding [GO:0005524]
ACA1	119.2732804	53.00768924	1.169997331	0.001015757	0.017136385	P35732	NUP42_YEAST	ABC transporter ATP-binding protein ARB1 (ATP-binding cassette protein involved in ribosome biogenesis 1)	ACA1 YER045C	489	nucleus [GO:0005634]; sequence-specific DNA binding [GO:0043565]; transcriptional activator activity, RNA polymerase II core promoter proximal region sequence-specific binding [GO:0001077]; positive regulation of transcription from RNA polymerase II promoter [GO:0045944]	nucleus [GO:0005634]	positive regulation of transcription from RNA polymerase II promoter [GO:0045944]	sequence-specific DNA binding [GO:0043565]; transcriptional activator activity, RNA polymerase II core promoter proximal region sequence-specific binding [GO:0001077]
HOM3	315.0255671	152.8784634	1.043083738	1.27E-05	0.000388487	P49686	ARB1_YEAST	ATF/CREB activator 1	HOM3 YER052C	527	aspartate kinase activity [GO:0004072]; ATP binding [GO:0005524]; homoserine biosynthetic process [GO:0009090]; lysine biosynthetic process via diaminopimelate [GO:0009089]; methionine biosynthetic process [GO:0009086]; threonine biosynthetic process [GO:0009088]		homoserine biosynthetic process [GO:0009090]; lysine biosynthetic process via diaminopimelate [GO:0009089]; methionine biosynthetic process [GO:0009086]; threonine biosynthetic process [GO:0009088]	aspartate kinase activity [GO:0004072]; ATP binding [GO:0005524]
CEM1	142.5680896	42.18251463	1.7569341	1.45E-06	5.65E-05	P40024	ACA1_YEAST	Aspartokinase (EC 2.7.2.4) (Aspartate kinase)	CEM1 YER061C	442	mitochondrion [GO:0005739]; 3-oxoacyl-[acyl-carrier-protein] synthase activity [GO:0004315]; fatty acid biosynthetic process [GO:0006633]	mitochondrion [GO:0005739]	fatty acid biosynthetic process [GO:0006633]	3-oxoacyl-[acyl-carrier-protein] synthase activity [GO:0004315]
RGI1	2075.103851	806.175696	1.364017344	2.83E-16	5.22E-14	P39970	AK_YEAST	3-oxoacyl-[acyl-carrier-protein] synthase homolog (EC 2.3.1.41) (Beta-ketoacyl-ACP synthase homolog)	RGI1 YER067W	161	cell periphery [GO:0071944]; plasma membrane [GO:0005886]; energy reserve metabolic process [GO:0006112]	cell periphery [GO:0071944]; plasma membrane [GO:0005886]	energy reserve metabolic process [GO:0006112]
YER067C-A	57.84969285	0	Inf	0.00341654	0.044268505	P10869	CEM1_YEAST	Respiratory growth induced protein 1	YER067C-A	107	integral component of membrane [GO:0016021]	integral component of membrane [GO:0016021]
DOT6	573.8982835	269.7115615	1.089377694	3.08E-08	1.72E-06	P39525	RGI1_YEAST	Putative uncharacterized membrane protein YER067C-A	DOT6 PBF2 YER088C	670	chromosome, telomeric region [GO:0000781]; nucleus [GO:0005634]; sequence-specific DNA binding [GO:0043565]; chromatin silencing at rDNA [GO:0000183]; chromatin silencing at telomere [GO:0006348]; regulation of transcription from RNA polymerase II promoter [GO:0006357]; transcription, DNA-templated [GO:0006351]; transfer RNA gene-mediated silencing [GO:0061587]	chromosome, telomeric region [GO:0000781]; nucleus [GO:0005634]	chromatin silencing at rDNA [GO:0000183]; chromatin silencing at telomere [GO:0006348]; regulation of transcription from RNA polymerase II promoter [GO:0006357]; transcription, DNA-templated [GO:0006351]; transfer RNA gene-mediated silencing [GO:0061587]	sequence-specific DNA binding [GO:0043565]
SSA4	861.1339401	331.130257	1.378838808	3.72E-12	3.64E-10	P40043	YE067_YEAST	Transcriptional regulatory protein DOT6 (Disrupter of telomere silencing protein 6) (PAC-binding factor 2)	SSA4 YER103W	642	cytoplasm [GO:0005737]; nucleus [GO:0005634]; ATP binding [GO:0005524]; ATPase activity [GO:0016887]; unfolded protein binding [GO:0051082]; cellular response to heat [GO:0034605]; protein folding [GO:0006457]; SRP-dependent cotranslational protein targeting to membrane, translocation [GO:0006616]	cytoplasm [GO:0005737]; nucleus [GO:0005634]	cellular response to heat [GO:0034605]; protein folding [GO:0006457]; SRP-dependent cotranslational protein targeting to membrane, translocation [GO:0006616]	ATPase activity [GO:0016887]; ATP binding [GO:0005524]; unfolded protein binding [GO:0051082]
BOI2	93.04775686	40.27239986	1.208179925	0.003393558	0.044056598	A0A023PYE4	DOT6_YEAST	Heat shock protein SSA4	BOI2 BEB1 YER114C	1040	cellular bud [GO:0005933]; cellular bud neck [GO:0005935]; cytoplasm [GO:0005737]; cytoskeleton [GO:0005856]; site of polarized growth [GO:0030427]; phospholipid binding [GO:0005543]; budding cell apical bud growth [GO:0007118]; cell separation after cytokinesis [GO:0000920]; establishment of cell polarity [GO:0030010]; Rho protein signal transduction [GO:0007266]	cellular bud [GO:0005933]; cellular bud neck [GO:0005935]; cytoplasm [GO:0005737]; cytoskeleton [GO:0005856]; site of polarized growth [GO:0030427]	budding cell apical bud growth [GO:0007118]; cell separation after cytokinesis [GO:0000920]; establishment of cell polarity [GO:0030010]; Rho protein signal transduction [GO:0007266]	phospholipid binding [GO:0005543]
SPT15	409.8491575	177.6466094	1.206082879	2.66E-08	1.51E-06	P40059	HSP74_YEAST	Protein BOI2 (Protein BEB1)	SPT15 BTF1 TBP1 YER148W	240	nucleoplasm [GO:0005654]; nucleus [GO:0005634]; protein complex [GO:0043234]; transcription factor TFIIA complex [GO:0005672]; transcription factor TFIID complex [GO:0005669]; transcription factor TFIIIB complex [GO:0000126]; chromatin binding [GO:0003682]; disordered domain specific binding [GO:0097718]; DNA binding, bending [GO:0008301]; RNA polymerase I transcription factor binding [GO:0001179…	nucleoplasm [GO:0005654]; nucleus [GO:0005634]; protein complex [GO:0043234]; transcription factor TFIIA complex [GO:0005672]; transcription factor TFIID complex [GO:0005669]; transcription factor TFIIIB complex [GO:0000126]	RNA polymerase III transcriptional preinitiation complex assembly [GO:0070898]; RNA polymerase II transcriptional preinitiation complex assembly [GO:0051123]; transcription elongation from RNA polymerase III promoter [GO:0006385]; transcription from RNA polymerase III promoter [GO:0006383]; transcription of nuclear large rRNA transcript from RNA polymerase I promoter [GO:0042790]; transposon inte…	chromatin binding [GO:0003682]; disordered domain specific binding [GO:0097718]; DNA binding, bending [GO:0008301]; RNA polymerase II activating transcription factor binding [GO:0001102]; RNA polymerase II core promoter sequence-specific DNA binding [GO:0000979]; RNA polymerase III regulatory region DNA binding [GO:0001016]; RNA polymerase I transcription factor binding [GO:0001179]; TFIIA-class …
SPI1	3862.023071	1236.09841	1.643563177	7.43E-19	2.06E-16	P22202	BOI2_YEAST	TATA-box-binding protein (TATA sequence-binding protein) (TBP) (TATA-binding factor) (TATA-box factor) (Transcription factor D) (Transcription initiation factor TFIID TBP subunit)	SPI1 YER150W	148	anchored component of membrane [GO:0031225]; extracellular region [GO:0005576]; fungal-type cell wall [GO:0009277]; structural constituent of cell wall [GO:0005199]; fungal-type cell wall organization [GO:0031505]; response to acidic pH [GO:0010447]	anchored component of membrane [GO:0031225]; extracellular region [GO:0005576]; fungal-type cell wall [GO:0009277]	fungal-type cell wall organization [GO:0031505]; response to acidic pH [GO:0010447]	structural constituent of cell wall [GO:0005199]
YER158C	234.458641	93.5637889	1.32531126	1.57E-06	6.00E-05	P39969	TBP_YEAST	Uncharacterized cell wall protein SPI1 (Stationary phase-induced protein 1)	YER158C	573
YER163C	242.8236156	144.7235138	0.746609395	0.002131702	0.031507751	P13393	SPI1_YEAST	Uncharacterized protein YER158C	GCG1 YER163C SYGP-ORF3	232	cytoplasm [GO:0005737]; nucleus [GO:0005634]; gamma-glutamylcyclotransferase activity [GO:0003839]; glutathione catabolic process [GO:0006751]	cytoplasm [GO:0005737]; nucleus [GO:0005634]	glutathione catabolic process [GO:0006751]	gamma-glutamylcyclotransferase activity [GO:0003839]
THI5	434.4912824	155.488029	1.48252372	2.20E-11	2.00E-09	P40092	YEY8_YEAST	Glutathione-specific gamma-glutamylcyclotransferase (Gamma-GCG) (EC 2.3.2.-)	THI5 MOL2 YFL058W	340	thiamine biosynthetic process [GO:0009228]; thiamine diphosphate biosynthetic process [GO:0009229]		thiamine biosynthetic process [GO:0009228]; thiamine diphosphate biosynthetic process [GO:0009229]
OTU1	37.20194706	0	Inf	6.29E-06	0.000210056	P40095	CHAC_YEAST	4-amino-5-hydroxymethyl-2-methylpyrimidine phosphate synthase THI5 (HMP-P synthase) (Hydroxymethylpyrimidine phosphate synthase) (Thiamine biosynthesis protein 5) (Thiamine pyrimidine synthase)	OTU1 YFL044C	301	cytosol [GO:0005829]; nucleus [GO:0005634]; metal ion binding [GO:0046872]; nucleic acid binding [GO:0003676]; thiol-dependent ubiquitin-specific protease activity [GO:0004843]; endoplasmic reticulum unfolded protein response [GO:0030968]; protein deubiquitination [GO:0016579]; regulation of transcription, DNA-templated [GO:0006355]; ubiquitin-dependent ERAD pathway [GO:0030433]	cytosol [GO:0005829]; nucleus [GO:0005634]	endoplasmic reticulum unfolded protein response [GO:0030968]; protein deubiquitination [GO:0016579]; regulation of transcription, DNA-templated [GO:0006355]; ubiquitin-dependent ERAD pathway [GO:0030433]	metal ion binding [GO:0046872]; nucleic acid binding [GO:0003676]; thiol-dependent ubiquitin-specific protease activity [GO:0004843]
MDJ1	409.6032587	183.9854153	1.154635786	7.59E-08	3.91E-06	P32656	THI5_YEAST	Ubiquitin thioesterase OTU1 (EC 3.4.19.12) (OTU domain-containing protein 1)	MDJ1 YFL016C	511	extrinsic component of mitochondrial inner membrane [GO:0031314]; mitochondrial matrix [GO:0005759]; ATP binding [GO:0005524]; ATPase activator activity [GO:0001671]; heat shock protein binding [GO:0031072]; metal ion binding [GO:0046872]; unfolded protein binding [GO:0051082]; 'de novo' protein folding [GO:0006458]; misfolded or incompletely synthesized protein catabolic process [GO:0006515]; mi…	extrinsic component of mitochondrial inner membrane [GO:0031314]; mitochondrial matrix [GO:0005759]	'de novo' protein folding [GO:0006458]; misfolded or incompletely synthesized protein catabolic process [GO:0006515]; mitochondrial genome maintenance [GO:0000002]; protein refolding [GO:0042026]; response to heat [GO:0009408]	ATPase activator activity [GO:0001671]; ATP binding [GO:0005524]; heat shock protein binding [GO:0031072]; metal ion binding [GO:0046872]; unfolded protein binding [GO:0051082]
AIM13	98.5376186	27.34589083	1.849350545	4.82E-05	0.001237078	P43534	OTU1_YEAST	DnaJ homolog 1, mitochondrial	MIC19 AIM13 MCS19 YFR011C	170	MICOS complex [GO:0061617]; mitochondrial crista junction [GO:0044284]; mitochondrial inner membrane [GO:0005743]; cristae formation [GO:0042407]	MICOS complex [GO:0061617]; mitochondrial crista junction [GO:0044284]; mitochondrial inner membrane [GO:0005743]	cristae formation [GO:0042407]
ROG3	128.2102063	43.80743861	1.549263345	2.34E-05	0.000663333	P43558	MDJ1_YEAST	MICOS complex subunit MIC19 (Altered inheritance of mitochondria protein 13, mitochondrial) (Mitochondrial contact site complex 19 kDa subunit)	ROG3 YFR022W	733	ubiquitin protein ligase binding [GO:0031625]; adaptation of signaling pathway by response to pheromone involved in conjugation with cellular fusion [GO:0000754]; positive regulation of receptor internalization [GO:0002092]; ubiquitin-dependent endocytosis [GO:0070086]		adaptation of signaling pathway by response to pheromone involved in conjugation with cellular fusion [GO:0000754]; positive regulation of receptor internalization [GO:0002092]; ubiquitin-dependent endocytosis [GO:0070086]	ubiquitin protein ligase binding [GO:0031625]
QCR6	703.062011	377.4503081	0.897365219	2.72E-06	9.86E-05	P35191	MIC19_YEAST	Protein ROG3 (Revertant of glycogen synthase kinase mutation protein 3)	QCR6 UCR6 YFR033C	147	mitochondrial intermembrane space [GO:0005758]; mitochondrial respiratory chain complex III [GO:0005750]; nuclear periphery [GO:0034399]; ubiquinol-cytochrome-c reductase activity [GO:0008121]; aerobic respiration [GO:0009060]; mitochondrial electron transport, ubiquinol to cytochrome c [GO:0006122]	mitochondrial intermembrane space [GO:0005758]; mitochondrial respiratory chain complex III [GO:0005750]; nuclear periphery [GO:0034399]	aerobic respiration [GO:0009060]; mitochondrial electron transport, ubiquinol to cytochrome c [GO:0006122]	ubiquinol-cytochrome-c reductase activity [GO:0008121]
PHO4	465.5292223	212.2294316	1.133246991	4.45E-08	2.41E-06	P43594	ROG3_YEAST	Cytochrome b-c1 complex subunit 6 (Complex III subunit 6) (Complex III subunit VI) (Cytochrome c1 non-heme 17 kDa protein) (Mitochondrial hinge protein) (Ubiquinol-cytochrome c reductase complex 17 kDa protein)	PHO4 YFR034C	312	cytoplasm [GO:0005737]; nucleus [GO:0005634]; protein dimerization activity [GO:0046983]; sequence-specific DNA binding [GO:0043565]; transcription factor activity, sequence-specific DNA binding [GO:0003700]; cellular response to phosphate starvation [GO:0016036]; chromatin remodeling [GO:0006338]; positive regulation of phosphate metabolic process [GO:0045937]; positive regulation of transcripti…	cytoplasm [GO:0005737]; nucleus [GO:0005634]	cellular response to phosphate starvation [GO:0016036]; chromatin remodeling [GO:0006338]; positive regulation of phosphate metabolic process [GO:0045937]; positive regulation of transcription from RNA polymerase II promoter [GO:0045944]; transcription, DNA-templated [GO:0006351]	protein dimerization activity [GO:0046983]; sequence-specific DNA binding [GO:0043565]; transcription factor activity, sequence-specific DNA binding [GO:0003700]
YFR052C-A	1831.415793	774.0555591	1.242450342	1.24E-14	1.72E-12	P43602	QCR6_YEAST	Phosphate system positive regulatory protein PHO4	YFR052C-A	101	integral component of membrane [GO:0016021]	integral component of membrane [GO:0016021]
HXK1	1951.049578	805.3825694	1.276504285	7.85E-15	1.19E-12	P00127	PHO4_YEAST	Putative uncharacterized protein YFR052C-A	HXK1 HKA YFR053C	485	cytoplasm [GO:0005737]; mitochondrion [GO:0005739]; ATP binding [GO:0005524]; fructokinase activity [GO:0008865]; glucokinase activity [GO:0004340]; glucose binding [GO:0005536]; hexokinase activity [GO:0004396]; mannokinase activity [GO:0019158]; cellular glucose homeostasis [GO:0001678]; fructose import [GO:0032445]; fructose metabolic process [GO:0006000]; glucose import [GO:0046323]; glucose …	cytoplasm [GO:0005737]; mitochondrion [GO:0005739]	cellular glucose homeostasis [GO:0001678]; fructose import [GO:0032445]; fructose metabolic process [GO:0006000]; glucose import [GO:0046323]; glucose metabolic process [GO:0006006]; glycolytic process [GO:0006096]; mannose metabolic process [GO:0006013]	ATP binding [GO:0005524]; fructokinase activity [GO:0008865]; glucokinase activity [GO:0004340]; glucose binding [GO:0005536]; hexokinase activity [GO:0004396]; mannokinase activity [GO:0019158]
ZRT1	2432.832561	1172.06448	1.05358509	4.39E-10	3.25E-08	P07270	YF052_YEAST	Hexokinase-1 (EC 2.7.1.1) (Hexokinase PI) (Hexokinase-A)	ZRT1 YGL255W NRC376	376	integral component of plasma membrane [GO:0005887]; high-affinity zinc uptake transmembrane transporter activity [GO:0000006]; high-affinity zinc II ion transport [GO:0006830]	integral component of plasma membrane [GO:0005887]	high-affinity zinc II ion transport [GO:0006830]	high-affinity zinc uptake transmembrane transporter activity [GO:0000006]
PDE1	421.9549343	252.5550359	0.740491115	0.000173279	0.003878061	A0A023PZH4	HXKA_YEAST	Zinc-regulated transporter 1 (High-affinity zinc transport protein ZRT1)	PDE1 YGL248W NRB369	369	intracellular [GO:0005622]; 3',5'-cyclic-AMP phosphodiesterase activity [GO:0004115]; 3',5'-cyclic-GMP phosphodiesterase activity [GO:0047555]; cAMP catabolic process [GO:0006198]; cAMP-mediated signaling [GO:0019933]; cGMP catabolic process [GO:0046069]; negative regulation of cAMP biosynthetic process [GO:0030818]; negative regulation of cAMP-dependent protein kinase activity [GO:2000480]; nega…	intracellular [GO:0005622]	cAMP catabolic process [GO:0006198]; cAMP-mediated signaling [GO:0019933]; cGMP catabolic process [GO:0046069]; negative regulation of cAMP biosynthetic process [GO:0030818]; negative regulation of cAMP-dependent protein kinase activity [GO:2000480]; negative regulation of glucose mediated signaling pathway [GO:1902660]; regulation of cAMP-mediated signaling [GO:0043949]	3',5'-cyclic-AMP phosphodiesterase activity [GO:0004115]; 3',5'-cyclic-GMP phosphodiesterase activity [GO:0047555]
CLG1	249.0134215	109.0377131	1.191396295	6.00E-06	0.000202292	P04806	ZRT1_YEAST	3',5'-cyclic-nucleotide phosphodiesterase 1 (PDEase 1) (EC 3.1.4.17) (3':5'-CNP) (Low-affinity cAMP phosphodiesterase)	CLG1 YGL215W G1105	452	cyclin-dependent protein kinase holoenzyme complex [GO:0000307]; cyclin-dependent protein serine/threonine kinase regulator activity [GO:0016538]; positive regulation of macroautophagy [GO:0016239]	cyclin-dependent protein kinase holoenzyme complex [GO:0000307]	positive regulation of macroautophagy [GO:0016239]	cyclin-dependent protein serine/threonine kinase regulator activity [GO:0016538]
YGL193C	344.4276197	210.1524629	0.712764473	0.000666127	0.012031914	P32804	PDE1_YEAST	PHO85 cyclin CLG1 (Cyclin-like G1 protein 1)	YGL193C G1334	103
COX13	916.0951331	486.8383444	0.912054622	1.59E-07	7.49E-06	P22434	CLG1_YEAST	Uncharacterized protein YGL193C	COX13 YGL191W G1341	129	mitochondrial respiratory chain complex IV [GO:0005751]; mitochondrion [GO:0005739]; cytochrome-c oxidase activity [GO:0004129]; enzyme regulator activity [GO:0030234]; aerobic respiration [GO:0009060]; mitochondrial electron transport, cytochrome c to oxygen [GO:0006123]; mitochondrial respiratory chain supercomplex assembly [GO:0097250]	mitochondrial respiratory chain complex IV [GO:0005751]; mitochondrion [GO:0005739]	aerobic respiration [GO:0009060]; mitochondrial electron transport, cytochrome c to oxygen [GO:0006123]; mitochondrial respiratory chain supercomplex assembly [GO:0097250]	cytochrome-c oxidase activity [GO:0004129]; enzyme regulator activity [GO:0030234]
YGL188C	382.5421199	197.2895953	0.955303732	6.95E-06	0.000226366	P35190	YGU3_YEAST	Cytochrome c oxidase subunit 6A, mitochondrial (EC 1.9.3.1) (Cytochrome c oxidase polypeptide VIa)	YGL188C	57
COX4	434.5803608	257.8392995	0.753150805	0.000129148	0.002998214	P53097	COX13_YEAST	Putative uncharacterized protein YGL188C	COX4 YGL187C G1362	155	mitochondrial inner membrane [GO:0005743]; mitochondrial intermembrane space [GO:0005758]; mitochondrial respiratory chain complex IV [GO:0005751]; mitochondrion [GO:0005739]; cytochrome-c oxidase activity [GO:0004129]; zinc ion binding [GO:0008270]; aerobic respiration [GO:0009060]; mitochondrial ATP synthesis coupled proton transport [GO:0042776]; mitochondrial electron transport, cytochrome c …	mitochondrial inner membrane [GO:0005743]; mitochondrial intermembrane space [GO:0005758]; mitochondrial respiratory chain complex IV [GO:0005751]; mitochondrion [GO:0005739]	aerobic respiration [GO:0009060]; mitochondrial ATP synthesis coupled proton transport [GO:0042776]; mitochondrial electron transport, cytochrome c to oxygen [GO:0006123]; mitochondrial respiratory chain complex IV assembly [GO:0033617]; protein targeting to mitochondrion [GO:0006626]	cytochrome-c oxidase activity [GO:0004129]; zinc ion binding [GO:0008270]
GPG1	704.2881209	452.801538	0.637286891	0.000439847	0.008649886	P32799	YGT8_YEAST	Cytochrome c oxidase subunit 4, mitochondrial (EC 1.9.3.1) (Cytochrome c oxidase polypeptide IV)	GPG1 YGL121C	126	cytoplasm [GO:0005737]; signal transducer activity [GO:0004871]; invasive growth in response to glucose limitation [GO:0001403]; signal transduction [GO:0007165]	cytoplasm [GO:0005737]	invasive growth in response to glucose limitation [GO:0001403]; signal transduction [GO:0007165]	signal transducer activity [GO:0004871]
NSA1	110.7624636	47.33949536	1.226352816	0.001272953	0.020892137	P53098	COX4_YEAST	Heterotrimeric G protein gamma subunit GPG1	NSA1 YGL111W G2990	463	nucleolus [GO:0005730]; preribosome, large subunit precursor [GO:0030687]; ribosomal large subunit biogenesis [GO:0042273]; rRNA processing [GO:0006364]	nucleolus [GO:0005730]; preribosome, large subunit precursor [GO:0030687]	ribosomal large subunit biogenesis [GO:0042273]; rRNA processing [GO:0006364]
PYC1	653.3537057	431.9220314	0.597093327	0.000988181	0.016756225	P04037	GPG1_YEAST	Ribosome biogenesis protein NSA1 (NOP7-associated protein 1)	PYC1 PYV YGL062W	1178	cytosol [GO:0005829]; ATP binding [GO:0005524]; biotin binding [GO:0009374]; biotin carboxylase activity [GO:0004075]; metal ion binding [GO:0046872]; pyruvate carboxylase activity [GO:0004736]; gluconeogenesis [GO:0006094]; pyruvate metabolic process [GO:0006090]	cytosol [GO:0005829]	gluconeogenesis [GO:0006094]; pyruvate metabolic process [GO:0006090]	ATP binding [GO:0005524]; biotin binding [GO:0009374]; biotin carboxylase activity [GO:0004075]; metal ion binding [GO:0046872]; pyruvate carboxylase activity [GO:0004736]
RAD6	252.0509795	137.6579093	0.872628057	0.000437872	0.008636595	P53130	NSA1_YEAST	Pyruvate carboxylase 1 (EC 6.4.1.1) (Pyruvic carboxylase 1) (PCB 1)	RAD6 UBC2 YGL058W	172	chromosome, telomeric region [GO:0000781]; cytoplasm [GO:0005737]; HULC complex [GO:0033503]; MUB1-RAD6-UBR2 ubiquitin ligase complex [GO:1990304]; nucleus [GO:0005634]; Rad6-Rad18 complex [GO:0097505]; ATP binding [GO:0005524]; ubiquitin protein ligase activity [GO:0061630]; ubiquitin protein ligase binding [GO:0031625]; ubiquitin-protein transferase activity [GO:0004842]; chromatin silencing at…	chromosome, telomeric region [GO:0000781]; cytoplasm [GO:0005737]; HULC complex [GO:0033503]; MUB1-RAD6-UBR2 ubiquitin ligase complex [GO:1990304]; nucleus [GO:0005634]; Rad6-Rad18 complex [GO:0097505]	chromatin silencing at telomere [GO:0006348]; DNA-templated transcription, termination [GO:0006353]; double-strand break repair via homologous recombination [GO:0000724]; error-free postreplication DNA repair [GO:0042275]; error-free translesion synthesis [GO:0070987]; error-prone translesion synthesis [GO:0042276]; histone monoubiquitination [GO:0010390]; meiotic DNA double-strand break formatio…	ATP binding [GO:0005524]; ubiquitin protein ligase activity [GO:0061630]; ubiquitin protein ligase binding [GO:0031625]; ubiquitin-protein transferase activity [GO:0004842]
LEU1	585.0326898	392.2203085	0.576853002	0.001337946	0.021744075	P53136	PYC1_YEAST	Ubiquitin-conjugating enzyme E2 2 (EC 2.3.2.23) (E2 ubiquitin-conjugating enzyme 2) (Radiation sensitivity protein 6) (Ubiquitin carrier protein UBC2) (Ubiquitin-protein ligase UBC2)	LEU1 YGL009C	779	3-isopropylmalate dehydratase complex [GO:0009316]; cytoplasmic stress granule [GO:0010494]; cytosol [GO:0005829]; 3-isopropylmalate dehydratase activity [GO:0003861]; 4 iron, 4 sulfur cluster binding [GO:0051539]; metal ion binding [GO:0046872]; leucine biosynthetic process [GO:0009098]	3-isopropylmalate dehydratase complex [GO:0009316]; cytoplasmic stress granule [GO:0010494]; cytosol [GO:0005829]	leucine biosynthetic process [GO:0009098]	3-isopropylmalate dehydratase activity [GO:0003861]; 4 iron, 4 sulfur cluster binding [GO:0051539]; metal ion binding [GO:0046872]
SEC9	336.1427988	207.5095856	0.695896262	0.000976936	0.01660791	P11154	UBC2_YEAST	3-isopropylmalate dehydratase (EC 4.2.1.33) (Alpha-IPM isomerase) (IPMI) (Isopropylmalate isomerase)	SEC9 HSS7 YGR009C	651	extrinsic component of plasma membrane [GO:0019897]; SNARE complex [GO:0031201]; SNAP receptor activity [GO:0005484]; SNARE binding [GO:0000149]; syntaxin binding [GO:0019905]; exocytosis [GO:0006887]; protein transport [GO:0015031]; SNARE complex assembly [GO:0035493]; vesicle fusion [GO:0006906]	extrinsic component of plasma membrane [GO:0019897]; SNARE complex [GO:0031201]	exocytosis [GO:0006887]; protein transport [GO:0015031]; SNARE complex assembly [GO:0035493]; vesicle fusion [GO:0006906]	SNAP receptor activity [GO:0005484]; SNARE binding [GO:0000149]; syntaxin binding [GO:0019905]
NQM1	1114.673615	830.2791938	0.424952889	0.001295087	0.021203056	P06104	LEUC_YEAST	Protein transport protein SEC9	NQM1 YGR043C	333	cytoplasm [GO:0005737]; sedoheptulose-7-phosphate:D-glyceraldehyde-3-phosphate glyceronetransferase activity [GO:0004801]; carbohydrate metabolic process [GO:0005975]; cellular response to oxidative stress [GO:0034599]; chronological cell aging [GO:0001300]; pentose-phosphate shunt [GO:0006098]	cytoplasm [GO:0005737]	carbohydrate metabolic process [GO:0005975]; cellular response to oxidative stress [GO:0034599]; chronological cell aging [GO:0001300]; pentose-phosphate shunt [GO:0006098]	sedoheptulose-7-phosphate:D-glyceraldehyde-3-phosphate glyceronetransferase activity [GO:0004801]
LSB1	625.860749	329.3783456	0.926095989	1.27E-06	5.07E-05	P07264	SEC9_YEAST	Transaldolase NQM1 (EC 2.2.1.2) (Non-quiescent mutant protein 1)	LSB1 YGR136W	241	actin cortical patch [GO:0030479]; cytoplasm [GO:0005737]; nucleus [GO:0005634]; ruffle membrane [GO:0032587]; actin filament binding [GO:0051015]; phosphatidylinositol binding [GO:0035091]; actin cortical patch localization [GO:0051666]; actin filament bundle assembly [GO:0051017]; negative regulation of Arp2/3 complex-mediated actin nucleation [GO:0034316]; regulation of ruffle assembly [GO:190…	actin cortical patch [GO:0030479]; cytoplasm [GO:0005737]; nucleus [GO:0005634]; ruffle membrane [GO:0032587]	actin cortical patch localization [GO:0051666]; actin filament bundle assembly [GO:0051017]; negative regulation of Arp2/3 complex-mediated actin nucleation [GO:0034316]; regulation of ruffle assembly [GO:1900027]	actin filament binding [GO:0051015]; phosphatidylinositol binding [GO:0035091]
YGR137W	616.6378474	332.4658126	0.891217444	2.81E-06	0.00010143	P40357	TAL2_YEAST	LAS seventeen-binding protein 1 (LAS17-binding protein 1)	YGR137W	124	integral component of membrane [GO:0016021]	integral component of membrane [GO:0016021]
TPO2	381.9001019	206.8695987	0.884473661	2.39E-05	0.0006743	P53228	LSB1_YEAST	Putative uncharacterized protein YGR137W	TPO2 YGR138C G6417	614	fungal-type vacuole membrane [GO:0000329]; integral component of membrane [GO:0016021]; plasma membrane [GO:0005886]; antiporter activity [GO:0015297]; spermine transmembrane transporter activity [GO:0000297]; spermine transport [GO:0000296]	fungal-type vacuole membrane [GO:0000329]; integral component of membrane [GO:0016021]; plasma membrane [GO:0005886]	spermine transport [GO:0000296]	antiporter activity [GO:0015297]; spermine transmembrane transporter activity [GO:0000297]
YGR139W	35.36050909	0	Inf	0.001672637	0.025916133	P53281	YG3E_YEAST	Polyamine transporter 2	YGR139W	112
BTN2	1076.865265	391.7997891	1.458649228	3.47E-16	6.24E-14	P53282	TPO2_YEAST	Putative uncharacterized protein YGR139W	BTN2 YGR142W	410	cytosol [GO:0005829]; late endosome [GO:0005770]; nuclear periphery [GO:0034399]; nucleus [GO:0005634]; perinuclear region of cytoplasm [GO:0048471]; chaperone binding [GO:0051087]; SNARE binding [GO:0000149]; amino acid transport [GO:0006865]; intracellular protein transport [GO:0006886]; protein folding [GO:0006457]; protein localization to nucleus [GO:0034504]; regulation of pH [GO:0006885]; r…	cytosol [GO:0005829]; late endosome [GO:0005770]; nuclear periphery [GO:0034399]; nucleus [GO:0005634]; perinuclear region of cytoplasm [GO:0048471]	amino acid transport [GO:0006865]; intracellular protein transport [GO:0006886]; protein folding [GO:0006457]; protein localization to nucleus [GO:0034504]; regulation of pH [GO:0006885]; retrograde transport, endosome to Golgi [GO:0042147]	chaperone binding [GO:0051087]; SNARE binding [GO:0000149]
THI4	455.9734812	313.3563238	0.541145813	0.003025301	0.040138071	P53283	YG3G_YEAST	Protein BTN2 (Batten disease protein 2)	THI4 ESP35 MOL1 YGR144W G6620	326	cytosol [GO:0005829]; mitochondrion [GO:0005739]; nucleus [GO:0005634]; thylakoid [GO:0009579]; ferrous iron binding [GO:0008198]; identical protein binding [GO:0042802]; oxidoreductase activity [GO:0016491]; protein domain specific binding [GO:0019904]; protein homodimerization activity [GO:0042803]; zinc ion binding [GO:0008270]; cellular response to DNA damage stimulus [GO:0006974]; mitochondr…	cytosol [GO:0005829]; mitochondrion [GO:0005739]; nucleus [GO:0005634]; thylakoid [GO:0009579]	cellular response to DNA damage stimulus [GO:0006974]; mitochondrial genome maintenance [GO:0000002]; response to cold [GO:0009409]; thiamine biosynthetic process [GO:0009228]; thiazole biosynthetic process [GO:0052837]	ferrous iron binding [GO:0008198]; identical protein binding [GO:0042802]; oxidoreductase activity [GO:0016491]; protein domain specific binding [GO:0019904]; protein homodimerization activity [GO:0042803]; zinc ion binding [GO:0008270]
RTS3	150.2554317	78.54041842	0.935909956	0.002649656	0.036388979	P53284	BTN2_YEAST	Thiamine thiazole synthase (Thiazole biosynthetic enzyme)	RTS3 YGR161C	263	cytoplasm [GO:0005737]; nucleus [GO:0005634]	cytoplasm [GO:0005737]; nucleus [GO:0005634]
YGR182C	831.7327787	563.9105512	0.560653753	0.000571696	0.010710945	P53286	THI4_YEAST	Protein phosphatase type 2A regulatory subunit RTS3	YGR182C G7160	117
QCR9	1203.857039	795.8694849	0.597060312	1.74E-05	0.000503495	P32318	RTS3_YEAST	Putative uncharacterized protein YGR182C	QCR9 UCR9 YGR183C	66	mitochondrial respiratory chain complex III [GO:0005750]; aerobic respiration [GO:0009060]; hydrogen ion transmembrane transport [GO:1902600]; mitochondrial electron transport, ubiquinol to cytochrome c [GO:0006122]; mitochondrial respiratory chain complex III assembly [GO:0034551]	mitochondrial respiratory chain complex III [GO:0005750]	aerobic respiration [GO:0009060]; hydrogen ion transmembrane transport [GO:1902600]; mitochondrial electron transport, ubiquinol to cytochrome c [GO:0006122]; mitochondrial respiratory chain complex III assembly [GO:0034551]
HIP1	121.7178219	51.8606667	1.230827764	0.000643255	0.011778826	P53289	YG45_YEAST	Cytochrome b-c1 complex subunit 9 (Complex III subunit 9) (Complex III subunit X) (Cytochrome c1 non-heme 7.3 kDa protein) (Ubiquinol-cytochrome c reductase complex 7.3 kDa protein)	HIP1 YGR191W G7572	603	integral component of membrane [GO:0016021]; plasma membrane [GO:0005886]; high-affinity L-histidine transmembrane transporter activity [GO:0005291]; histidine transport [GO:0015817]; manganese ion transport [GO:0006828]	integral component of membrane [GO:0016021]; plasma membrane [GO:0005886]	histidine transport [GO:0015817]; manganese ion transport [GO:0006828]	high-affinity L-histidine transmembrane transporter activity [GO:0005291]
TDH3	11184.34022	9343.455902	0.259451983	0.001816244	0.027816991	P53300	QCR9_YEAST	Histidine permease	TDH3 GPD3 YGR192C G7576	332	cytosol [GO:0005829]; fungal-type cell wall [GO:0009277]; lipid particle [GO:0005811]; mitochondrion [GO:0005739]; glyceraldehyde-3-phosphate dehydrogenase (NAD+) (phosphorylating) activity [GO:0004365]; NAD binding [GO:0051287]; NADP binding [GO:0050661]; RNA binding [GO:0003723]; apoptotic process [GO:0006915]; gluconeogenesis [GO:0006094]; glycolytic process [GO:0006096]; heme transport [GO:00…	cytosol [GO:0005829]; fungal-type cell wall [GO:0009277]; lipid particle [GO:0005811]; mitochondrion [GO:0005739]	apoptotic process [GO:0006915]; gluconeogenesis [GO:0006094]; glycolytic process [GO:0006096]; heme transport [GO:0015886]; reactive oxygen species metabolic process [GO:0072593]	glyceraldehyde-3-phosphate dehydrogenase (NAD+) (phosphorylating) activity [GO:0004365]; NAD binding [GO:0051287]; NADP binding [GO:0050661]; RNA binding [GO:0003723]
SNG1	168.0191399	86.69089504	0.954673204	0.001115482	0.018536517	P22289	HIP1_YEAST	Glyceraldehyde-3-phosphate dehydrogenase 3 (GAPDH 3) (EC 1.2.1.12)	SNG1 YGR197C G7591	547	integral component of membrane [GO:0016021]; plasma membrane [GO:0005886]; nucleobase-containing compound transport [GO:0015931]; regulation of fungal-type cell wall organization [GO:0060237]; regulation of phospholipid translocation [GO:0061091]	integral component of membrane [GO:0016021]; plasma membrane [GO:0005886]	nucleobase-containing compound transport [GO:0015931]; regulation of fungal-type cell wall organization [GO:0060237]; regulation of phospholipid translocation [GO:0061091]
YGR204C-A	31.59301708	0	Inf	0.003306228	0.043175826	P06775	G3P3_YEAST	Nitrosoguanidine resistance protein SNG1	YGR204C-A	37
ZPR1	359.3274644	118.2986232	1.602865926	7.74E-11	6.68E-09	P00359	SNG1_YEAST	Uncharacterized protein YGR204C-A	ZPR1 YGR211W	486	cytoplasm [GO:0005737]; nucleus [GO:0005634]; zinc ion binding [GO:0008270]; cellular response to starvation [GO:0009267]; regulation of mitotic cell cycle [GO:0007346]; response to glucose [GO:0009749]	cytoplasm [GO:0005737]; nucleus [GO:0005634]	cellular response to starvation [GO:0009267]; regulation of mitotic cell cycle [GO:0007346]; response to glucose [GO:0009749]	zinc ion binding [GO:0008270]
CWC22	202.7331687	117.5703336	0.786058071	0.003272881	0.042824485	P46950	YG204_YEAST	Zinc finger protein ZPR1	CWC22 YGR278W	577	catalytic step 2 spliceosome [GO:0071013]; cytoplasm [GO:0005737]; U2-type spliceosomal complex [GO:0005684]; RNA binding [GO:0003723]; mRNA splicing, via spliceosome [GO:0000398]	catalytic step 2 spliceosome [GO:0071013]; cytoplasm [GO:0005737]; U2-type spliceosomal complex [GO:0005684]	mRNA splicing, via spliceosome [GO:0000398]	RNA binding [GO:0003723]
SCW4	777.505982	399.9823818	0.958917321	4.79E-07	2.07E-05	Q8TGT7	ZPR1_YEAST	Pre-mRNA-splicing factor CWC22 (Complexed with CEF1 protein 22)	SCW4 YGR279C	386	extracellular region [GO:0005576]; fungal-type cell wall [GO:0009277]; vacuole [GO:0005773]; glucosidase activity [GO:0015926]; carbohydrate metabolic process [GO:0005975]; cell wall organization [GO:0071555]; conjugation with cellular fusion [GO:0000747]	extracellular region [GO:0005576]; fungal-type cell wall [GO:0009277]; vacuole [GO:0005773]	carbohydrate metabolic process [GO:0005975]; cell wall organization [GO:0071555]; conjugation with cellular fusion [GO:0000747]	glucosidase activity [GO:0015926]
BGL2	721.740326	426.6606425	0.75839083	4.74E-05	0.001221358	P53303	CWC22_YEAST	Probable family 17 glucosidase SCW4 (EC 3.2.1.-) (Soluble cell wall protein 4)	BGL2 SCW9 YGR282C	313	extracellular region [GO:0005576]; fungal-type cell wall [GO:0009277]; 1,3-beta-glucanosyltransferase activity [GO:0042124]; chitin binding [GO:0008061]; glucan endo-1,3-beta-D-glucosidase activity [GO:0042973]; glucan exo-1,3-beta-glucosidase activity [GO:0004338]; carbohydrate metabolic process [GO:0005975]; fungal-type cell wall organization [GO:0031505]	extracellular region [GO:0005576]; fungal-type cell wall [GO:0009277]	carbohydrate metabolic process [GO:0005975]; fungal-type cell wall organization [GO:0031505]	1,3-beta-glucanosyltransferase activity [GO:0042124]; chitin binding [GO:0008061]; glucan endo-1,3-beta-D-glucosidase activity [GO:0042973]; glucan exo-1,3-beta-glucosidase activity [GO:0004338]
QCR10	363.7159092	143.2927915	1.343845997	5.24E-09	3.32E-07	P53333	SCW4_YEAST	Glucan 1,3-beta-glucosidase (EC 3.2.1.58) (Exo-1,3-beta-glucanase) (GP29) (Soluble cell wall protein 9)	QCR10 YHR001W-A YHR001BW	77	mitochondrial respiratory chain complex III [GO:0005750]; aerobic respiration [GO:0009060]; hydrogen ion transmembrane transport [GO:1902600]; mitochondrial electron transport, ubiquinol to cytochrome c [GO:0006122]	mitochondrial respiratory chain complex III [GO:0005750]	aerobic respiration [GO:0009060]; hydrogen ion transmembrane transport [GO:1902600]; mitochondrial electron transport, ubiquinol to cytochrome c [GO:0006122]
FSH1	330.226828	175.3831894	0.91294686	3.74E-05	0.000995435	P53334	BGL2_YEAST	Cytochrome b-c1 complex subunit 10 (Complex III subunit 10) (Complex III subunit XI) (Ubiquinol-cytochrome c reductase complex 8.5 kDa protein)	FSH1 YHR049W	243	cytoplasm [GO:0005737]; nucleus [GO:0005634]; carboxylic ester hydrolase activity [GO:0052689]	cytoplasm [GO:0005737]; nucleus [GO:0005634]		carboxylic ester hydrolase activity [GO:0052689]
YHR052W-A	448.2415999	140.8441158	1.670177255	1.11E-13	1.37E-11	P15703	QCR10_YEAST	Family of serine hydrolases 1 (EC 3.1.-.-)	YHR052W-A	64	integral component of membrane [GO:0016021]	integral component of membrane [GO:0016021]
CUP1-1	20557.52138	11551.62307	0.831570756	8.10E-19	2.15E-16	P37299	FSH1_YEAST	Putative uncharacterized protein YHR052W-A	CUP1-1 MTH1 YHR053C	61	cytosol [GO:0005829]; antioxidant activity [GO:0016209]; cadmium ion binding [GO:0046870]; copper ion binding [GO:0005507]; superoxide dismutase activity [GO:0004784]; detoxification of cadmium ion [GO:0071585]; detoxification of copper ion [GO:0010273]; removal of superoxide radicals [GO:0019430]; response to copper ion [GO:0046688]	cytosol [GO:0005829]	detoxification of cadmium ion [GO:0071585]; detoxification of copper ion [GO:0010273]; removal of superoxide radicals [GO:0019430]; response to copper ion [GO:0046688]	antioxidant activity [GO:0016209]; cadmium ion binding [GO:0046870]; copper ion binding [GO:0005507]; superoxide dismutase activity [GO:0004784]
YHR054W-A	311.1045547	102.0024383	1.608795877	1.98E-09	1.34E-07	P38777	YH052_YEAST	Copper metallothionein 1-1 (Cu-MT) (Cu-metallothionein) (Copper chelatin) (Copper thionein)	YHR054W-A	64	integral component of membrane [GO:0016021]	integral component of membrane [GO:0016021]
CUP1-2	20762.23406	11633.82291	0.83563644	4.64E-19	1.45E-16	P0CL32	MTCU1_YEAST	Putative uncharacterized protein YHR054W-A	CUP1-2 MTH1 YHR055C	61	cytosol [GO:0005829]; antioxidant activity [GO:0016209]; cadmium ion binding [GO:0046870]; copper ion binding [GO:0005507]; superoxide dismutase activity [GO:0004784]; detoxification of cadmium ion [GO:0071585]; detoxification of copper ion [GO:0010273]; removal of superoxide radicals [GO:0019430]; response to copper ion [GO:0046688]	cytosol [GO:0005829]	detoxification of cadmium ion [GO:0071585]; detoxification of copper ion [GO:0010273]; removal of superoxide radicals [GO:0019430]; response to copper ion [GO:0046688]	antioxidant activity [GO:0016209]; cadmium ion binding [GO:0046870]; copper ion binding [GO:0005507]; superoxide dismutase activity [GO:0004784]
DYS1	113.6554258	51.85917571	1.131995378	0.001866788	0.028374752	P0CX80	YH054_YEAST	Copper metallothionein 1-2 (Cu-MT) (Cu-metallothionein) (Copper chelatin) (Copper thionein)	DYS1 YHR068W	387	deoxyhypusine synthase activity [GO:0034038]; peptidyl-lysine modification to peptidyl-hypusine [GO:0008612]		peptidyl-lysine modification to peptidyl-hypusine [GO:0008612]	deoxyhypusine synthase activity [GO:0034038]
HXT4	427.5795759	276.143143	0.630776638	0.000950632	0.016327786	P0CL33	MTCU2_YEAST	Deoxyhypusine synthase (DHS) (EC 2.5.1.46)	HXT4 LGT1 RAG1 YHR092C	576	integral component of membrane [GO:0016021]; plasma membrane [GO:0005886]; fructose transmembrane transporter activity [GO:0005353]; glucose transmembrane transporter activity [GO:0005355]; mannose transmembrane transporter activity [GO:0015578]; pentose transmembrane transporter activity [GO:0015146]; sugar:proton symporter activity [GO:0005351]; glucose import [GO:0046323]; hexose transport [GO…	integral component of membrane [GO:0016021]; plasma membrane [GO:0005886]	glucose import [GO:0046323]; hexose transport [GO:0008645]	fructose transmembrane transporter activity [GO:0005353]; glucose transmembrane transporter activity [GO:0005355]; mannose transmembrane transporter activity [GO:0015578]; pentose transmembrane transporter activity [GO:0015146]; sugar:proton symporter activity [GO:0005351]
GRE3	312.2216833	189.3624544	0.721420423	0.000920327	0.015889381	P0CX81	DHYS_YEAST	Low-affinity glucose transporter HXT4 (Low-affinity glucose transporter LGT1)	GRE3 YHR104W	327	cytoplasm [GO:0005737]; nucleus [GO:0005634]; alditol:NADP+ 1-oxidoreductase activity [GO:0004032]; D-xylose:NADP reductase activity [GO:0032866]; mRNA binding [GO:0003729]; arabinose catabolic process [GO:0019568]; cellular response to osmotic stress [GO:0071470]; cellular response to oxidative stress [GO:0034599]; D-xylose catabolic process [GO:0042843]; galactose catabolic process [GO:0019388]	cytoplasm [GO:0005737]; nucleus [GO:0005634]	arabinose catabolic process [GO:0019568]; cellular response to osmotic stress [GO:0071470]; cellular response to oxidative stress [GO:0034599]; D-xylose catabolic process [GO:0042843]; galactose catabolic process [GO:0019388]	alditol:NADP+ 1-oxidoreductase activity [GO:0004032]; D-xylose:NADP reductase activity [GO:0032866]; mRNA binding [GO:0003729]
YHR112C	273.6510841	156.4726706	0.806426873	0.000946106	0.016292139	P38791	HXT4_YEAST	NADPH-dependent aldose reductase GRE3 (AR) (EC 1.1.1.21) (Genes de respuesta a estres protein 3) (NADPH-dependent aldo-keto reductase GRE3) (Xylose reductase) (EC 1.1.1.-)	YHR112C	378	cytoplasm [GO:0005737]; nucleus [GO:0005634]; cystathionine beta-lyase activity [GO:0004121]; cystathionine gamma-lyase activity [GO:0004123]; cystathionine gamma-synthase activity [GO:0003962]; pyridoxal phosphate binding [GO:0030170]; 'de novo' L-methionine biosynthetic process [GO:0071266]; cysteine biosynthetic process via cystathionine [GO:0019343]; sulfur compound metabolic process [GO:0006…	cytoplasm [GO:0005737]; nucleus [GO:0005634]	'de novo' L-methionine biosynthetic process [GO:0071266]; cysteine biosynthetic process via cystathionine [GO:0019343]; sulfur compound metabolic process [GO:0006790]; transsulfuration [GO:0019346]	cystathionine beta-lyase activity [GO:0004121]; cystathionine gamma-lyase activity [GO:0004123]; cystathionine gamma-synthase activity [GO:0003962]; pyridoxal phosphate binding [GO:0030170]
YAP1801	393.442852	269.5551446	0.545573654	0.003918385	0.049516163	P32467	GRE3_YEAST	Uncharacterized trans-sulfuration enzyme YHR112C	YAP1801 YHR161C	637	actin cortical patch [GO:0030479]; cellular bud neck [GO:0005935]; clathrin-coated vesicle [GO:0030136]; plasma membrane [GO:0005886]; 1-phosphatidylinositol binding [GO:0005545]; clathrin binding [GO:0030276]; clathrin coat assembly [GO:0048268]; endocytosis [GO:0006897]	actin cortical patch [GO:0030479]; cellular bud neck [GO:0005935]; clathrin-coated vesicle [GO:0030136]; plasma membrane [GO:0005886]	clathrin coat assembly [GO:0048268]; endocytosis [GO:0006897]	1-phosphatidylinositol binding [GO:0005545]; clathrin binding [GO:0030276]
YIL169C	68.99302376	0	Inf	2.71E-05	0.000759353	P38715	YHR2_YEAST	Clathrin coat assembly protein AP180A	YIL169C YI9402.07C	995	membrane [GO:0016020]; signal transducer activity [GO:0004871]	membrane [GO:0016020]		signal transducer activity [GO:0004871]
SUC2	230.8057549	64.27745359	1.844294515	5.59E-10	4.00E-08	P38716	AP18A_YEAST	Putative uncharacterized protein YIL169C	SUC2 YIL162W	532	cytoplasm [GO:0005737]; extracellular region [GO:0005576]; beta-fructofuranosidase activity [GO:0004564]; inulinase activity [GO:0051670]; sucrose alpha-glucosidase activity [GO:0004575]; fructan catabolic process [GO:0010147]; inulin catabolic process [GO:1902927]; raffinose catabolic process [GO:0034484]; sucrose catabolic process [GO:0005987]	cytoplasm [GO:0005737]; extracellular region [GO:0005576]	fructan catabolic process [GO:0010147]; inulin catabolic process [GO:1902927]; raffinose catabolic process [GO:0034484]; sucrose catabolic process [GO:0005987]	beta-fructofuranosidase activity [GO:0004564]; inulinase activity [GO:0051670]; sucrose alpha-glucosidase activity [GO:0004575]
KGD1	205.3045407	92.39090963	1.151942719	4.69E-05	0.001213553	P38856	YIQ9_YEAST	Invertase 2 (EC 3.2.1.26) (Beta-fructofuranosidase 2) (Saccharase)	KGD1 OGD1 YIL125W	1014	mitochondrial nucleoid [GO:0042645]; mitochondrial oxoglutarate dehydrogenase complex [GO:0009353]; oxoglutarate dehydrogenase (succinyl-transferring) activity [GO:0004591]; thiamine pyrophosphate binding [GO:0030976]; 2-oxoglutarate metabolic process [GO:0006103]; tricarboxylic acid cycle [GO:0006099]	mitochondrial nucleoid [GO:0042645]; mitochondrial oxoglutarate dehydrogenase complex [GO:0009353]	2-oxoglutarate metabolic process [GO:0006103]; tricarboxylic acid cycle [GO:0006099]	oxoglutarate dehydrogenase (succinyl-transferring) activity [GO:0004591]; thiamine pyrophosphate binding [GO:0030976]
COX5B	268.7732505	130.2738023	1.044842571	3.89E-05	0.001027019	P40442	INV2_YEAST	2-oxoglutarate dehydrogenase, mitochondrial (EC 1.2.4.2) (2-oxoglutarate dehydrogenase complex component E1) (OGDC-E1) (Alpha-ketoglutarate dehydrogenase)	COX5B YIL111W	151	mitochondrial respiratory chain complex IV [GO:0005751]; cytochrome-c oxidase activity [GO:0004129]; mitochondrial electron transport, cytochrome c to oxygen [GO:0006123]	mitochondrial respiratory chain complex IV [GO:0005751]	mitochondrial electron transport, cytochrome c to oxygen [GO:0006123]	cytochrome-c oxidase activity [GO:0004129]
HPM1	56.40321176	0	Inf	0.00223467	0.032431993	P00724	ODO1_YEAST	Cytochrome c oxidase polypeptide 5B, mitochondrial (EC 1.9.3.1) (Cytochrome c oxidase polypeptide Vb)	HPM1 MNI1 YIL110W	377	cytoplasm [GO:0005737]; nucleus [GO:0005634]; protein-histidine N-methyltransferase activity [GO:0018064]; S-adenosylmethionine-dependent methyltransferase activity [GO:0008757]; peptidyl-histidine methylation, to form tele-methylhistidine [GO:0042038]	cytoplasm [GO:0005737]; nucleus [GO:0005634]	peptidyl-histidine methylation, to form tele-methylhistidine [GO:0042038]	protein-histidine N-methyltransferase activity [GO:0018064]; S-adenosylmethionine-dependent methyltransferase activity [GO:0008757]
YIL100C-A	49.0362975	0	Inf	0.000477837	0.009189636	P20967	COX5B_YEAST	Histidine protein methyltransferase 1 (EC 2.1.1.85) (Mitotic exit network interactor 1)	YIL100C-A	112	integral component of membrane [GO:0016021]	integral component of membrane [GO:0016021]
YIL047C-A	465.980943	250.0424235	0.898098064	6.45E-06	0.000213305	P00425	HPM1_YEAST	Putative uncharacterized protein YIL100C-A	YIL047C-A	122
SYG1	465.980943	251.6976771	0.888579052	7.83E-06	0.000248933	P40481	YI100_YEAST	Putative uncharacterized protein YIL047C-A	SYG1 YIL047C	902	integral component of membrane [GO:0016021]; plasma membrane [GO:0005886]; signal transduction [GO:0007165]	integral component of membrane [GO:0016021]; plasma membrane [GO:0005886]	signal transduction [GO:0007165]
MET30	303.5172692	171.8463643	0.820659275	0.000375992	0.00755051	Q03884	YI047_YEAST	Protein SYG1	MET30 YIL046W	640	cytoplasm [GO:0005737]; nuclear SCF ubiquitin ligase complex [GO:0043224]; nucleus [GO:0005634]; SCF ubiquitin ligase complex [GO:0019005]; identical protein binding [GO:0042802]; ubiquitin binding [GO:0043130]; cysteine biosynthetic process [GO:0019344]; DNA replication initiation [GO:0006270]; G1/S transition of mitotic cell cycle [GO:0000082]; methionine biosynthetic process [GO:0009086]; prot…	cytoplasm [GO:0005737]; nuclear SCF ubiquitin ligase complex [GO:0043224]; nucleus [GO:0005634]; SCF ubiquitin ligase complex [GO:0019005]	cysteine biosynthetic process [GO:0019344]; DNA replication initiation [GO:0006270]; G1/S transition of mitotic cell cycle [GO:0000082]; methionine biosynthetic process [GO:0009086]; protein polyubiquitination [GO:0000209]; protein ubiquitination [GO:0016567]; regulation of DNA-dependent DNA replication initiation [GO:0030174]; regulation of transcription involved in G1/S transition of mitotic ce…	identical protein binding [GO:0042802]; ubiquitin binding [GO:0043130]
TIM44	171.9701422	72.29886098	1.25011328	6.70E-05	0.001668405	A0A023PYH8	SYG1_YEAST	F-box protein MET30 (E3 ubiquitin ligase complex SCF(Met30) subunit MET30) (Methionine-requiring protein 30)	TIM44 ISP45 MIM44 MPI1 YIL022W	431	extrinsic component of mitochondrial inner membrane [GO:0031314]; mitochondrial inner membrane [GO:0005743]; mitochondrial inner membrane presequence translocase complex [GO:0005744]; presequence translocase-associated import motor [GO:0001405]; ATP binding [GO:0005524]; chaperone binding [GO:0051087]; protein binding, bridging [GO:0030674]; protein import into mitochondrial matrix [GO:0030150]; …	extrinsic component of mitochondrial inner membrane [GO:0031314]; mitochondrial inner membrane [GO:0005743]; mitochondrial inner membrane presequence translocase complex [GO:0005744]; presequence translocase-associated import motor [GO:0001405]	protein import into mitochondrial matrix [GO:0030150]; protein targeting to mitochondrion [GO:0006626]	ATP binding [GO:0005524]; chaperone binding [GO:0051087]; protein binding, bridging [GO:0030674]
YIR035C	233.7631591	123.4585859	0.921020409	0.000307866	0.006375018	P40528	MET30_YEAST	Mitochondrial import inner membrane translocase subunit TIM44 (Inner membrane import site protein 45) (ISP45) (Membrane import machinery protein MIM44) (Mitochondrial protein import protein 1)	YIR035C	254	oxidoreductase activity [GO:0016491]			oxidoreductase activity [GO:0016491]
YPS6	216.6414689	129.0328086	0.747571486	0.002981433	0.039714598	P39014	TIM44_YEAST	Uncharacterized oxidoreductase YIR035C (EC 1.-.-.-)	YPS6 YIR039C	537	anchored component of external side of plasma membrane [GO:0031362]; extracellular region [GO:0005576]; fungal-type cell wall [GO:0009277]; aspartic-type endopeptidase activity [GO:0004190]; fungal-type cell wall organization [GO:0031505]; protein catabolic process [GO:0030163]; proteolysis [GO:0006508]	anchored component of external side of plasma membrane [GO:0031362]; extracellular region [GO:0005576]; fungal-type cell wall [GO:0009277]	fungal-type cell wall organization [GO:0031505]; protein catabolic process [GO:0030163]; proteolysis [GO:0006508]	aspartic-type endopeptidase activity [GO:0004190]
REE1	268.3981965	94.20258028	1.510536496	2.16E-08	1.27E-06	Q01852	YIV5_YEAST	Aspartic proteinase yapsin-6 (EC 3.4.23.-)	REE1 YJL217W HRC198 J0226	198	cytoplasm [GO:0005737]	cytoplasm [GO:0005737]
YJL144W	989.9360006	506.6059266	0.966471303	6.97E-09	4.33E-07	P40579	YPS6_YEAST	Regulation of enolase protein 1	YJL144W J0646	104	cellular response to water deprivation [GO:0042631]		cellular response to water deprivation [GO:0042631]
YJL133C-A	723.2167969	381.1084521	0.924226581	1.47E-06	5.68E-05	P40583	REE1_YEAST	Uncharacterized protein YJL144W	YJL133C-A	74	integral component of membrane [GO:0016021]; mitochondrial outer membrane [GO:0005741]	integral component of membrane [GO:0016021]; mitochondrial outer membrane [GO:0005741]
NCA3	365.5817124	130.5271724	1.485843734	3.06E-10	2.36E-08	P40893	YJO4_YEAST	Uncharacterized protein YJL133C-A	NCA3 YJL116C J0748	337	cell surface [GO:0009986]; fungal-type cell wall [GO:0009277]; mitochondrion [GO:0005739]; fungal-type cell wall organization [GO:0031505]; mitochondrion organization [GO:0007005]	cell surface [GO:0009986]; fungal-type cell wall [GO:0009277]; mitochondrion [GO:0005739]	fungal-type cell wall organization [GO:0031505]; mitochondrion organization [GO:0007005]
IML2	73.81650231	20.02393425	1.88221792	0.000239392	0.005051562	P47009	YJ133_YEAST	Beta-glucosidase-like protein NCA3, mitochondrial	IML2 YJL082W J1007	731	integral component of membrane [GO:0016021]; mitochondrial outer membrane [GO:0005741]; cellular response to misfolded protein [GO:0071218]	integral component of membrane [GO:0016021]; mitochondrial outer membrane [GO:0005741]	cellular response to misfolded protein [GO:0071218]
PRY1	101.0210746	38.14073572	1.405251715	0.000380001	0.007608042	Q3E7A3	NCA3_YEAST	Mitochondrial outer membrane protein IML2 (Increased minichromosome loss protein 2)	PRY1 YJL079C J1022	299	extracellular region [GO:0005576]; cholesterol binding [GO:0015485]; magnesium ion binding [GO:0000287]; sterol binding [GO:0032934]; sterol transport [GO:0015918]	extracellular region [GO:0005576]	sterol transport [GO:0015918]	cholesterol binding [GO:0015485]; magnesium ion binding [GO:0000287]; sterol binding [GO:0032934]
PRY3	112.3324753	35.11392813	1.677659768	3.47E-05	0.000932952	P46955	IML2_YEAST	Protein PRY1 (Pathogenesis-related protein 1)	PRY3 YJL078C J1027	881	anchored component of membrane [GO:0031225]; extracellular region [GO:0005576]; fungal-type cell wall [GO:0009277]; sterol transport [GO:0015918]	anchored component of membrane [GO:0031225]; extracellular region [GO:0005576]; fungal-type cell wall [GO:0009277]	sterol transport [GO:0015918]
MPM1	473.417924	241.8283054	0.96913121	1.41E-06	5.50E-05	P47031	PRY1_YEAST	Cell wall protein PRY3 (Pathogenesis-related protein 3)	MPM1 YJL066C HRE252 J1111	252	extrinsic component of membrane [GO:0019898]; mitochondrial intermembrane space [GO:0005758]; mitochondrial membrane [GO:0031966]; mitochondrion [GO:0005739]	extrinsic component of membrane [GO:0019898]; mitochondrial intermembrane space [GO:0005758]; mitochondrial membrane [GO:0031966]; mitochondrion [GO:0005739]
YJL055W	550.061784	345.2569931	0.671923038	0.000272804	0.005684419	P47032	PRY3_YEAST	Mitochondrial peculiar membrane protein 1	YJL055W J1148	245	cellular response to drug [GO:0035690]; response to purine-containing compound [GO:0014074]		cellular response to drug [GO:0035690]; response to purine-containing compound [GO:0014074]
TDH1	2996.52086	2192.225978	0.450891896	0.002018015	0.030075663	P47033	MPM1_YEAST	LOG family protein YJL055W	TDH1 GPD1 SSS2 YJL052W J1154	332	cytosol [GO:0005829]; fungal-type cell wall [GO:0009277]; lipid particle [GO:0005811]; mitochondrion [GO:0005739]; glyceraldehyde-3-phosphate dehydrogenase (NAD+) (phosphorylating) activity [GO:0004365]; NAD binding [GO:0051287]; NADP binding [GO:0050661]; gluconeogenesis [GO:0006094]; glycolytic process [GO:0006096]	cytosol [GO:0005829]; fungal-type cell wall [GO:0009277]; lipid particle [GO:0005811]; mitochondrion [GO:0005739]	gluconeogenesis [GO:0006094]; glycolytic process [GO:0006096]	glyceraldehyde-3-phosphate dehydrogenase (NAD+) (phosphorylating) activity [GO:0004365]; NAD binding [GO:0051287]; NADP binding [GO:0050661]
NOP9	44.82038477	0	Inf	0.003749788	0.047566488	P40364	YJF5_YEAST	Glyceraldehyde-3-phosphate dehydrogenase 1 (GAPDH 1) (EC 1.2.1.12)	NOP9 YJL010C J1357	666	90S preribosome [GO:0030686]; nucleolus [GO:0005730]; preribosome, small subunit precursor [GO:0030688]; RNA binding [GO:0003723]; endonucleolytic cleavage in 5'-ETS of tricistronic rRNA transcript (SSU-rRNA, 5.8S rRNA, LSU-rRNA) [GO:0000480]; endonucleolytic cleavage in ITS1 to separate SSU-rRNA from 5.8S rRNA and LSU-rRNA from tricistronic rRNA transcript (SSU-rRNA, 5.8S rRNA, LSU-rRNA) [GO:000…	90S preribosome [GO:0030686]; nucleolus [GO:0005730]; preribosome, small subunit precursor [GO:0030688]	endonucleolytic cleavage in 5'-ETS of tricistronic rRNA transcript (SSU-rRNA, 5.8S rRNA, LSU-rRNA) [GO:0000480]; endonucleolytic cleavage in ITS1 to separate SSU-rRNA from 5.8S rRNA and LSU-rRNA from tricistronic rRNA transcript (SSU-rRNA, 5.8S rRNA, LSU-rRNA) [GO:0000447]; endonucleolytic cleavage to generate mature 5'-end of SSU-rRNA from (SSU-rRNA, 5.8S rRNA, LSU-rRNA) [GO:0000472]; ribosomal …	RNA binding [GO:0003723]
TDH2	4326.418646	3322.133814	0.381063089	0.002746087	0.037251509	P47044	G3P1_YEAST	Nucleolar protein 9 (Pumilio domain-containing protein NOP9)	TDH2 GPD2 YJR009C J1433	332	cytosol [GO:0005829]; fungal-type cell wall [GO:0009277]; lipid particle [GO:0005811]; mitochondrion [GO:0005739]; glyceraldehyde-3-phosphate dehydrogenase (NAD+) (phosphorylating) activity [GO:0004365]; NAD binding [GO:0051287]; NADP binding [GO:0050661]; promoter-specific chromatin binding [GO:1990841]; apoptotic process [GO:0006915]; gluconeogenesis [GO:0006094]; glycolytic process [GO:0006096…	cytosol [GO:0005829]; fungal-type cell wall [GO:0009277]; lipid particle [GO:0005811]; mitochondrion [GO:0005739]	apoptotic process [GO:0006915]; gluconeogenesis [GO:0006094]; glycolytic process [GO:0006096]; reactive oxygen species metabolic process [GO:0072593]	glyceraldehyde-3-phosphate dehydrogenase (NAD+) (phosphorylating) activity [GO:0004365]; NAD binding [GO:0051287]; NADP binding [GO:0050661]; promoter-specific chromatin binding [GO:1990841]
SSC1	990.5601693	537.4235101	0.882185176	5.32E-08	2.83E-06	P00360	NOP9_YEAST	Glyceraldehyde-3-phosphate dehydrogenase 2 (GAPDH 2) (EC 1.2.1.12)	SSC1 ENS1 YJR045C J1639	654	mitochondrial inner membrane [GO:0005743]; mitochondrial nucleoid [GO:0042645]; nucleus [GO:0005634]; presequence translocase-associated import motor [GO:0001405]; ATP binding [GO:0005524]; ATPase activity [GO:0016887]; enzyme regulator activity [GO:0030234]; unfolded protein binding [GO:0051082]; positive regulation of endodeoxyribonuclease activity [GO:0032079]; protein import into mitochondria…	mitochondrial inner membrane [GO:0005743]; mitochondrial nucleoid [GO:0042645]; nucleus [GO:0005634]; presequence translocase-associated import motor [GO:0001405]	positive regulation of endodeoxyribonuclease activity [GO:0032079]; protein import into mitochondrial matrix [GO:0030150]; protein refolding [GO:0042026]; protein unfolding [GO:0043335]	ATPase activity [GO:0016887]; ATP binding [GO:0005524]; enzyme regulator activity [GO:0030234]; unfolded protein binding [GO:0051082]
TAH11	438.1708584	172.711178	1.34313208	4.79E-10	3.46E-08	P47077	G3P2_YEAST	Heat shock protein SSC1, mitochondrial (Endonuclease SceI 75 kDa subunit) (Endo.SceI 75 kDa subunit) (mtHSP70)	TAH11 CDT1 SID2 YJR046W J1641	604	cytoplasm [GO:0005737]; nuclear pre-replicative complex [GO:0005656]; nucleus [GO:0005634]; DNA replication origin binding [GO:0003688]; cell division [GO:0051301]; double-strand break repair via break-induced replication [GO:0000727]; pre-replicative complex assembly involved in nuclear cell cycle DNA replication [GO:0006267]; regulation of DNA-dependent DNA replication initiation [GO:0030174]	cytoplasm [GO:0005737]; nuclear pre-replicative complex [GO:0005656]; nucleus [GO:0005634]	cell division [GO:0051301]; double-strand break repair via break-induced replication [GO:0000727]; pre-replicative complex assembly involved in nuclear cell cycle DNA replication [GO:0006267]; regulation of DNA-dependent DNA replication initiation [GO:0030174]	DNA replication origin binding [GO:0003688]
CYC1	1242.417551	814.4659742	0.609223782	1.04E-05	0.000323565	P00358	HSP77_YEAST	Cell division cycle protein CDT1 (SIC1 indispensable protein 2) (Topoisomerase-A hypersensitive protein 11)	CYC1 YJR048W J1653	109	mitochondrial intermembrane space [GO:0005758]; respiratory chain [GO:0070469]; electron carrier activity [GO:0009055]; heme binding [GO:0020037]; metal ion binding [GO:0046872]; mitochondrial electron transport, cytochrome c to oxygen [GO:0006123]; mitochondrial electron transport, ubiquinol to cytochrome c [GO:0006122]	mitochondrial intermembrane space [GO:0005758]; respiratory chain [GO:0070469]	mitochondrial electron transport, cytochrome c to oxygen [GO:0006123]; mitochondrial electron transport, ubiquinol to cytochrome c [GO:0006122]	electron carrier activity [GO:0009055]; heme binding [GO:0020037]; metal ion binding [GO:0046872]
MIR1	905.2366154	516.8286035	0.808609024	1.80E-06	6.80E-05	P0CS90	CDT1_YEAST	Cytochrome c iso-1	MIR1 YJR077C J1837	311	integral component of mitochondrial inner membrane [GO:0031305]; mitochondrial inner membrane [GO:0005743]; mitochondrial intermembrane space [GO:0005758]; mitochondrion [GO:0005739]; inorganic phosphate transmembrane transporter activity [GO:0005315]; mitochondrial transport [GO:0006839]; phosphate ion transmembrane transport [GO:0035435]; protein targeting to mitochondrion [GO:0006626]	integral component of mitochondrial inner membrane [GO:0031305]; mitochondrial inner membrane [GO:0005743]; mitochondrial intermembrane space [GO:0005758]; mitochondrion [GO:0005739]	mitochondrial transport [GO:0006839]; phosphate ion transmembrane transport [GO:0035435]; protein targeting to mitochondrion [GO:0006626]	inorganic phosphate transmembrane transporter activity [GO:0005315]
YJR096W	1150.865277	532.0143549	1.11318188	3.09E-12	3.16E-10	P47112	CYC1_YEAST	Mitochondrial phosphate carrier protein (Mitochondrial import receptor) (Phosphate transport protein) (PTP) (mPic 1) (p32) [Cleaved into: Mitochondrial phosphate carrier protein, N-terminally processed]	YJR096W J1926	282	alditol:NADP+ 1-oxidoreductase activity [GO:0004032]; aldo-keto reductase (NADP) activity [GO:0004033]; arabinose catabolic process [GO:0019568]; cellular response to oxidative stress [GO:0034599]; D-xylose catabolic process [GO:0042843]		arabinose catabolic process [GO:0019568]; cellular response to oxidative stress [GO:0034599]; D-xylose catabolic process [GO:0042843]	alditol:NADP+ 1-oxidoreductase activity [GO:0004032]; aldo-keto reductase (NADP) activity [GO:0004033]
YJR115W	151.7708172	72.33068169	1.069214759	0.000697304	0.012459631	P00044	MPCP_YEAST	Uncharacterized oxidoreductase YJR096W (EC 1.-.-.-)	YJR115W J2027	169
ATP2	828.5907018	476.2590849	0.798913018	7.35E-06	0.000237152	P23641	YJ66_YEAST	Uncharacterized protein YJR115W	ATP2 YJR121W J2041	511	cytosol [GO:0005829]; mitochondrial inner membrane [GO:0005743]; mitochondrial intermembrane space [GO:0005758]; mitochondrial proton-transporting ATP synthase, catalytic core [GO:0005754]; ATP binding [GO:0005524]; proton-transporting ATP synthase activity, rotational mechanism [GO:0046933]; proton-transporting ATPase activity, rotational mechanism [GO:0046961]; ATP synthesis coupled proton tran…	cytosol [GO:0005829]; mitochondrial inner membrane [GO:0005743]; mitochondrial intermembrane space [GO:0005758]; mitochondrial proton-transporting ATP synthase, catalytic core [GO:0005754]	ATP synthesis coupled proton transport [GO:0015986]; protein targeting to mitochondrion [GO:0006626]	ATP binding [GO:0005524]; proton-transporting ATPase activity, rotational mechanism [GO:0046961]; proton-transporting ATP synthase activity, rotational mechanism [GO:0046933]
THI11	621.4402608	173.4439405	1.841146272	3.79E-18	9.00E-16	P47137	YJ85_YEAST	ATP synthase subunit beta, mitochondrial (EC 3.6.3.14)	THI11 YJR156C J2250	340	thiamine biosynthetic process [GO:0009228]; thiamine diphosphate biosynthetic process [GO:0009229]		thiamine biosynthetic process [GO:0009228]; thiamine diphosphate biosynthetic process [GO:0009229]
ZRT3	390.9994729	235.0725528	0.734060563	0.000220426	0.004757049	P47152	ATPB_YEAST	4-amino-5-hydroxymethyl-2-methylpyrimidine phosphate synthase THI11 (HMP-P synthase) (Hydroxymethylpyrimidine phosphate synthase) (Thiamine biosynthesis protein 11) (Thiamine pyrimidine synthase)	ZRT3 YKL175W YKL640	503	fungal-type vacuole membrane [GO:0000329]; integral component of membrane [GO:0016021]; zinc ion transmembrane transporter activity [GO:0005385]; cellular zinc ion homeostasis [GO:0006882]; zinc II ion transport [GO:0006829]	fungal-type vacuole membrane [GO:0000329]; integral component of membrane [GO:0016021]	cellular zinc ion homeostasis [GO:0006882]; zinc II ion transport [GO:0006829]	zinc ion transmembrane transporter activity [GO:0005385]
HAP4	526.9460228	195.5373885	1.430210698	9.60E-12	9.11E-10	P00830	THI11_YEAST	Zinc-regulated transporter 3 (Vacuolar membrane zinc transporter)	HAP4 YKL109W YKL465	554	CCAAT-binding factor complex [GO:0016602]; mitochondrial respiratory chain [GO:0005746]; DNA binding [GO:0003677]; RNA polymerase II activating transcription factor binding [GO:0001102]; transcription factor activity, RNA polymerase II transcription factor binding [GO:0001076]; carbon catabolite activation of transcription from RNA polymerase II promoter [GO:0000436]; regulation of cellular respi…	CCAAT-binding factor complex [GO:0016602]; mitochondrial respiratory chain [GO:0005746]	carbon catabolite activation of transcription from RNA polymerase II promoter [GO:0000436]; regulation of cellular respiration [GO:0043457]; transcription from RNA polymerase II promoter [GO:0006366]	DNA binding [GO:0003677]; RNA polymerase II activating transcription factor binding [GO:0001102]; transcription factor activity, RNA polymerase II transcription factor binding [GO:0001076]
MDH1	893.4479665	473.5053257	0.916003058	2.27E-07	1.06E-05	P47183	ZRT3_YEAST	Transcriptional activator HAP4	MDH1 YKL085W	334	mitochondrial matrix [GO:0005759]; mitochondrion [GO:0005739]; L-malate dehydrogenase activity [GO:0030060]; mRNA binding [GO:0003729]; aerobic respiration [GO:0009060]; carbohydrate metabolic process [GO:0005975]; chronological cell aging [GO:0001300]; malate metabolic process [GO:0006108]; replicative cell aging [GO:0001302]; tricarboxylic acid cycle [GO:0006099]	mitochondrial matrix [GO:0005759]; mitochondrion [GO:0005739]	aerobic respiration [GO:0009060]; carbohydrate metabolic process [GO:0005975]; chronological cell aging [GO:0001300]; malate metabolic process [GO:0006108]; replicative cell aging [GO:0001302]; tricarboxylic acid cycle [GO:0006099]	L-malate dehydrogenase activity [GO:0030060]; mRNA binding [GO:0003729]
MSN4	84.6682329	32.47403284	1.38253422	0.001798539	0.027621886	P34240	HAP4_YEAST	Malate dehydrogenase, mitochondrial (EC 1.1.1.37)	MSN4 YKL062W	630	cytosol [GO:0005829]; nucleus [GO:0005634]; core promoter proximal region sequence-specific DNA binding [GO:0000987]; metal ion binding [GO:0046872]; RNA polymerase II transcription factor activity, sequence-specific DNA binding [GO:0000981]; transcription factor activity, RNA polymerase II core promoter proximal region sequence-specific binding [GO:0000982]; age-dependent response to oxidative s…	cytosol [GO:0005829]; nucleus [GO:0005634]	age-dependent response to oxidative stress involved in chronological cell aging [GO:0001324]; cellular response to acidic pH [GO:0071468]; chromatin remodeling [GO:0006338]; positive regulation of transcription from RNA polymerase II promoter [GO:0045944]; positive regulation of transcription from RNA polymerase II promoter in response to acidic pH [GO:0061402]; positive regulation of transcripti…	core promoter proximal region sequence-specific DNA binding [GO:0000987]; metal ion binding [GO:0046872]; RNA polymerase II transcription factor activity, sequence-specific DNA binding [GO:0000981]; transcription factor activity, RNA polymerase II core promoter proximal region sequence-specific binding [GO:0000982]
YKL044W	68.75604963	0	Inf	9.49E-06	0.000297688	P14064	MDHM_YEAST	Zinc finger protein MSN4 (Multicopy suppressor of SNF1 protein 4)	YKL044W YKL257	106	integral component of membrane [GO:0016021]	integral component of membrane [GO:0016021]
PHD1	417.8180129	142.978762	1.547073826	9.42E-12	9.07E-10	P17505	MSN4_YEAST	Uncharacterized protein YKL044W	PHD1 YKL043W YKL256	366	nucleus [GO:0005634]; DNA binding [GO:0003677]; transcription factor activity, sequence-specific DNA binding [GO:0003700]; positive regulation of pseudohyphal growth [GO:2000222]; positive regulation of transcription from RNA polymerase II promoter [GO:0045944]; transcription, DNA-templated [GO:0006351]	nucleus [GO:0005634]	positive regulation of pseudohyphal growth [GO:2000222]; positive regulation of transcription from RNA polymerase II promoter [GO:0045944]; transcription, DNA-templated [GO:0006351]	DNA binding [GO:0003677]; transcription factor activity, sequence-specific DNA binding [GO:0003700]
VPS24	219.7669429	104.071952	1.078393088	8.05E-05	0.001959113	P33749	YKE44_YEAST	Putative transcription factor PHD1	VPS24 DID3 YKL041W YKL254	224	cytoplasm [GO:0005737]; ESCRT III complex [GO:0000815]; ATP export [GO:1904669]; intralumenal vesicle formation [GO:0070676]; late endosome to vacuole transport [GO:0045324]; protein transport [GO:0015031]; ubiquitin-dependent protein catabolic process via the multivesicular body sorting pathway [GO:0043162]	cytoplasm [GO:0005737]; ESCRT III complex [GO:0000815]	ATP export [GO:1904669]; intralumenal vesicle formation [GO:0070676]; late endosome to vacuole transport [GO:0045324]; protein transport [GO:0015031]; ubiquitin-dependent protein catabolic process via the multivesicular body sorting pathway [GO:0043162]
URA6	51.95478723	0	Inf	0.00255583	0.035468324	P36092	PHD1_YEAST	Vacuolar protein-sorting-associated protein 24 (DOA4-independent degradation protein 3) (ESCRT-III complex subunit VPS24)	URA6 SOC8 YKL024C	204	cytoplasm [GO:0005737]; nucleus [GO:0005634]; adenylate kinase activity [GO:0004017]; ATP binding [GO:0005524]; cytidylate kinase activity [GO:0004127]; uridylate kinase activity [GO:0009041]; 'de novo' pyrimidine nucleobase biosynthetic process [GO:0006207]; nucleobase-containing compound metabolic process [GO:0006139]; pyrimidine nucleotide biosynthetic process [GO:0006221]	cytoplasm [GO:0005737]; nucleus [GO:0005634]	'de novo' pyrimidine nucleobase biosynthetic process [GO:0006207]; nucleobase-containing compound metabolic process [GO:0006139]; pyrimidine nucleotide biosynthetic process [GO:0006221]	adenylate kinase activity [GO:0004017]; ATP binding [GO:0005524]; cytidylate kinase activity [GO:0004127]; uridylate kinase activity [GO:0009041]
MRT4	138.7159816	62.74650074	1.144527101	0.000572045	0.010710945	P36093	VPS24_YEAST	Uridylate kinase (UK) (EC 2.7.4.14) (ATP:UMP phosphotransferase) (Deoxycytidylate kinase) (CK) (dCMP kinase) (Suppressor of cdc8 protein) (Uridine monophosphate kinase) (UMP kinase) (UMPK)	MRT4 YKL009W YKL160	236	cytosolic ribosome [GO:0022626]; nucleolus [GO:0005730]; nucleoplasm [GO:0005654]; preribosome, large subunit precursor [GO:0030687]; large ribosomal subunit rRNA binding [GO:0070180]; structural constituent of ribosome [GO:0003735]; nuclear-transcribed mRNA catabolic process [GO:0000956]; ribosomal large subunit assembly [GO:0000027]; ribosomal large subunit biogenesis [GO:0042273]; rRNA process…	cytosolic ribosome [GO:0022626]; nucleolus [GO:0005730]; nucleoplasm [GO:0005654]; preribosome, large subunit precursor [GO:0030687]	nuclear-transcribed mRNA catabolic process [GO:0000956]; ribosomal large subunit assembly [GO:0000027]; ribosomal large subunit biogenesis [GO:0042273]; rRNA processing [GO:0006364]	large ribosomal subunit rRNA binding [GO:0070180]; structural constituent of ribosome [GO:0003735]
TOF2	318.8854374	176.4966048	0.853397784	0.0001321	0.003038453	P36095	KCY_YEAST	Ribosome assembly factor MRT4 (mRNA turnover protein 4)	TOF2 YKR010C YK109	771	nucleolus [GO:0005730]; phosphatase activator activity [GO:0019211]; rDNA binding [GO:0000182]; chromatin silencing at rDNA [GO:0000183]; negative regulation of septation initiation signaling [GO:0031030]; nucleolus organization [GO:0007000]; protein localization to nucleolar rDNA repeats [GO:0034503]; rDNA condensation [GO:0070550]	nucleolus [GO:0005730]	chromatin silencing at rDNA [GO:0000183]; negative regulation of septation initiation signaling [GO:0031030]; nucleolus organization [GO:0007000]; protein localization to nucleolar rDNA repeats [GO:0034503]; rDNA condensation [GO:0070550]	phosphatase activator activity [GO:0019211]; rDNA binding [GO:0000182]
FCJ1	107.1974935	36.99222219	1.5349773	0.000140998	0.003198684	P15700	MRT4_YEAST	Topoisomerase 1-associated factor 2	MIC60 AIM28 FCJ1 FMP13 YKR016W	540	MICOS complex [GO:0061617]; mitochondrial crista [GO:0030061]; mitochondrial crista junction [GO:0044284]; mitochondrial inner membrane [GO:0005743]; cristae formation [GO:0042407]; protein import into mitochondrial intermembrane space [GO:0045041]	MICOS complex [GO:0061617]; mitochondrial crista [GO:0030061]; mitochondrial crista junction [GO:0044284]; mitochondrial inner membrane [GO:0005743]	cristae formation [GO:0042407]; protein import into mitochondrial intermembrane space [GO:0045041]
UTH1	1472.455704	852.7256376	0.788070697	3.85E-08	2.11E-06	P33201	TOF2_YEAST	MICOS complex subunit MIC60 (Altered inheritance of mitochondria protein 28) (Formation of crista junctions protein 1) (Found in mitochondrial proteome protein 13) (Mitofilin)	UTH1 YKR042W	365	cell surface [GO:0009986]; extracellular region [GO:0005576]; extrinsic component of mitochondrial inner membrane [GO:0031314]; fungal-type cell wall [GO:0009277]; mitochondrial outer membrane [GO:0005741]; hydrolase activity, acting on glycosyl bonds [GO:0016798]; barrier septum assembly [GO:0000917]; fungal-type cell wall biogenesis [GO:0009272]; fungal-type cell wall organization [GO:0031505];…	cell surface [GO:0009986]; extracellular region [GO:0005576]; extrinsic component of mitochondrial inner membrane [GO:0031314]; fungal-type cell wall [GO:0009277]; mitochondrial outer membrane [GO:0005741]	barrier septum assembly [GO:0000917]; fungal-type cell wall biogenesis [GO:0009272]; fungal-type cell wall organization [GO:0031505]; mitophagy [GO:0000422]; negative regulation of chromatin silencing involved in replicative cell aging [GO:0001308]; polysaccharide catabolic process [GO:0000272]	hydrolase activity, acting on glycosyl bonds [GO:0016798]
RHO4	54.1567299	0	Inf	0.001866026	0.028374752	Q02208	MIC60_YEAST	Probable secreted beta-glucosidase UTH1 (EC 3.2.1.-) (Youth protein 1)	RHO4 YKR055W	291	cellular bud neck [GO:0005935]; incipient cellular bud site [GO:0000131]; plasma membrane [GO:0005886]; GTP binding [GO:0005525]; GTPase activity [GO:0003924]; maintenance of cell polarity [GO:0030011]; positive regulation of formin-nucleated actin cable assembly [GO:0090338]; regulation of formin-nucleated actin cable assembly [GO:0090337]; small GTPase mediated signal transduction [GO:0007264]	cellular bud neck [GO:0005935]; incipient cellular bud site [GO:0000131]; plasma membrane [GO:0005886]	maintenance of cell polarity [GO:0030011]; positive regulation of formin-nucleated actin cable assembly [GO:0090338]; regulation of formin-nucleated actin cable assembly [GO:0090337]; small GTPase mediated signal transduction [GO:0007264]	GTPase activity [GO:0003924]; GTP binding [GO:0005525]
KTR2	633.0788763	358.6825729	0.819677607	1.34E-05	0.000400811	P36112	UTH1_YEAST	GTP-binding protein RHO4	KTR2 YKR061W	425	Golgi apparatus [GO:0005794]; Golgi membrane [GO:0000139]; integral component of membrane [GO:0016021]; alpha-1,2-mannosyltransferase activity [GO:0000026]; mannosyltransferase activity [GO:0000030]; cell wall mannoprotein biosynthetic process [GO:0000032]; protein N-linked glycosylation [GO:0006487]	Golgi apparatus [GO:0005794]; Golgi membrane [GO:0000139]; integral component of membrane [GO:0016021]	cell wall mannoprotein biosynthetic process [GO:0000032]; protein N-linked glycosylation [GO:0006487]	alpha-1,2-mannosyltransferase activity [GO:0000026]; mannosyltransferase activity [GO:0000030]
SIS2	67.43756143	21.64885823	1.63926143	0.001597673	0.025046535	P36135	RHO4_YEAST	Probable mannosyltransferase KTR2 (EC 2.4.1.-)	SIS2 HAL3 YKR072C	562	CoA-synthesizing protein complex [GO:1990143]; cytoplasm [GO:0005737]; nucleus [GO:0005634]; phosphopantothenoylcysteine decarboxylase complex [GO:0071513]; identical protein binding [GO:0042802]; phosphopantothenoylcysteine decarboxylase activity [GO:0004633]; protein phosphatase inhibitor activity [GO:0004864]; coenzyme A biosynthetic process [GO:0015937]; regulation of mitotic cell cycle [GO:0…	CoA-synthesizing protein complex [GO:1990143]; cytoplasm [GO:0005737]; nucleus [GO:0005634]; phosphopantothenoylcysteine decarboxylase complex [GO:0071513]	coenzyme A biosynthetic process [GO:0015937]; regulation of mitotic cell cycle [GO:0007346]; response to salt stress [GO:0009651]	identical protein binding [GO:0042802]; phosphopantothenoylcysteine decarboxylase activity [GO:0004633]; protein phosphatase inhibitor activity [GO:0004864]
SKG1	125.5542183	59.85025338	1.06888124	0.001869737	0.028374752	Q00246	KTR2_YEAST	Phosphopantothenoylcysteine decarboxylase subunit SIS2 (Halotolerance protein HAL3) (Sit4 suppressor 2)	SKG1 YKR100C YKR099C-A	355	cellular bud membrane [GO:0033101]; cellular bud tip [GO:0005934]; incipient cellular bud site [GO:0000131]; integral component of membrane [GO:0016021]; fungal-type cell wall organization [GO:0031505]	cellular bud membrane [GO:0033101]; cellular bud tip [GO:0005934]; incipient cellular bud site [GO:0000131]; integral component of membrane [GO:0016021]	fungal-type cell wall organization [GO:0031505]
YLL056C	371.6892269	163.1240151	1.188127683	1.15E-07	5.65E-06	P33550	SIS2_YEAST	Suppressor of lethality of KEX2 GAS1 double null mutant protein 1	YLL056C L0575	298	catalytic activity [GO:0003824]; coenzyme binding [GO:0050662]			catalytic activity [GO:0003824]; coenzyme binding [GO:0050662]
FRA1	291.1834429	175.6074254	0.729574476	0.001459312	0.023261499	P36024	SKG1_YEAST	Uncharacterized protein YLL056C	FRA1 YLL029W	749	cytosol [GO:0005829]; metal ion binding [GO:0046872]; metalloaminopeptidase activity [GO:0070006]; negative regulation of transcription from RNA polymerase II promoter in response to iron [GO:0034396]	cytosol [GO:0005829]	negative regulation of transcription from RNA polymerase II promoter in response to iron [GO:0034396]	metal ion binding [GO:0046872]; metalloaminopeptidase activity [GO:0070006]
HSP104	2259.608643	1027.445979	1.137010382	1.74E-11	1.63E-09	P36169	YL056_YEAST	Putative Xaa-Pro aminopeptidase FRA1 (EC 3.4.11.9) (Fe repressor of activation 1)	HSP104 YLL026W L0948	908	cytoplasm [GO:0005737]; nuclear periphery [GO:0034399]; nucleus [GO:0005634]; TRC complex [GO:0072380]; ADP binding [GO:0043531]; ATP binding [GO:0005524]; ATPase activity, coupled [GO:0042623]; chaperone binding [GO:0051087]; unfolded protein binding [GO:0051082]; cellular heat acclimation [GO:0070370]; chaperone cofactor-dependent protein refolding [GO:0070389]; inheritance of oxidatively modif…	cytoplasm [GO:0005737]; nuclear periphery [GO:0034399]; nucleus [GO:0005634]; TRC complex [GO:0072380]	cellular heat acclimation [GO:0070370]; chaperone cofactor-dependent protein refolding [GO:0070389]; inheritance of oxidatively modified proteins involved in replicative cell aging [GO:0001319]; protein folding in endoplasmic reticulum [GO:0034975]; protein metabolic process [GO:0019538]; protein unfolding [GO:0043335]; stress granule disassembly [GO:0035617]; trehalose metabolism in response to …	ADP binding [GO:0043531]; ATPase activity, coupled [GO:0042623]; ATP binding [GO:0005524]; chaperone binding [GO:0051087]; unfolded protein binding [GO:0051082]
COX17	480.5312612	334.3363563	0.523330045	0.003695878	0.047152588	Q12177	FRA1_YEAST	Heat shock protein 104 (Protein aggregation-remodeling factor HSP104)	COX17 YLL009C L1343	69	cytosol [GO:0005829]; mitochondrial intermembrane space [GO:0005758]; mitochondrion [GO:0005739]; copper chaperone activity [GO:0016531]; cuprous ion binding [GO:1903136]; intracellular copper ion transport [GO:0015680]; mitochondrial respiratory chain complex IV assembly [GO:0033617]; protein farnesylation [GO:0018343]; protein targeting to mitochondrion [GO:0006626]	cytosol [GO:0005829]; mitochondrial intermembrane space [GO:0005758]; mitochondrion [GO:0005739]	intracellular copper ion transport [GO:0015680]; mitochondrial respiratory chain complex IV assembly [GO:0033617]; protein farnesylation [GO:0018343]; protein targeting to mitochondrion [GO:0006626]	copper chaperone activity [GO:0016531]; cuprous ion binding [GO:1903136]
IZH3	166.6771778	75.41814871	1.144072935	0.000233193	0.004973035	Q07825	HS104_YEAST	Cytochrome c oxidase copper chaperone	IZH3 YLR023C	543	endoplasmic reticulum membrane [GO:0005789]; integral component of membrane [GO:0016021]; receptor activity [GO:0004872]; cellular zinc ion homeostasis [GO:0006882]	endoplasmic reticulum membrane [GO:0005789]; integral component of membrane [GO:0016021]	cellular zinc ion homeostasis [GO:0006882]	receptor activity [GO:0004872]
SHM2	635.1026622	261.5337372	1.279992755	1.29E-10	1.07E-08	P31539	COX17_YEAST	ADIPOR-like receptor IZH3 (Implicated in zinc homeostasis protein 3)	SHM2 SHMT2 YLR058C L2156	469	cytoplasm [GO:0005737]; glycine hydroxymethyltransferase activity [GO:0004372]; pyridoxal phosphate binding [GO:0030170]; glycine biosynthetic process [GO:0006545]; one-carbon metabolic process [GO:0006730]; tetrahydrofolate interconversion [GO:0035999]	cytoplasm [GO:0005737]	glycine biosynthetic process [GO:0006545]; one-carbon metabolic process [GO:0006730]; tetrahydrofolate interconversion [GO:0035999]	glycine hydroxymethyltransferase activity [GO:0004372]; pyridoxal phosphate binding [GO:0030170]
BUD20	302.3122245	187.8603403	0.68637879	0.001898327	0.028658165	Q12287	IZH3_YEAST	Serine hydroxymethyltransferase, cytosolic (SHMT) (EC 2.1.2.1) (Glycine hydroxymethyltransferase) (Serine methylase)	BUD20 YLR074C	166	cytoplasm [GO:0005737]; endoplasmic reticulum [GO:0005783]; nucleus [GO:0005634]; preribosome, large subunit precursor [GO:0030687]; nucleic acid binding [GO:0003676]; ribosomal large subunit binding [GO:0043023]; zinc ion binding [GO:0008270]; ribosomal large subunit export from nucleus [GO:0000055]	cytoplasm [GO:0005737]; endoplasmic reticulum [GO:0005783]; nucleus [GO:0005634]; preribosome, large subunit precursor [GO:0030687]	ribosomal large subunit export from nucleus [GO:0000055]	nucleic acid binding [GO:0003676]; ribosomal large subunit binding [GO:0043023]; zinc ion binding [GO:0008270]
GIS3	138.504535	36.99371319	1.904581193	4.18E-07	1.84E-05	Q07959	GLYC_YEAST	Bud site selection protein 20	GIS3 YLR094C	502	cytoplasm [GO:0005737]; nucleus [GO:0005634]; intracellular signal transduction [GO:0035556]	cytoplasm [GO:0005737]; nucleus [GO:0005634]	intracellular signal transduction [GO:0035556]
AHP1	2833.659472	1721.532479	0.718972997	1.28E-05	0.000389471	P37291	BUD20_YEAST	Protein GIS3	AHP1 YLR109W L2916 L9354.5	176	cytoplasm [GO:0005737]; thioredoxin peroxidase activity [GO:0008379]; cell redox homeostasis [GO:0045454]; cellular response to oxidative stress [GO:0034599]; response to metal ion [GO:0010038]	cytoplasm [GO:0005737]	cell redox homeostasis [GO:0045454]; cellular response to oxidative stress [GO:0034599]; response to metal ion [GO:0010038]	thioredoxin peroxidase activity [GO:0008379]
ZRT2	519.7415536	295.9422505	0.812478729	2.23E-05	0.000636257	Q08004	GIS3_YEAST	Peroxiredoxin type-2 (EC 1.11.1.15) (AHPC1) (Cytoplasmic thiol peroxidase 3) (cTPx 3) (Peroxiredoxin type II) (Peroxisomal alkyl hydroperoxide reductase) (TPx type II) (Thiol-specific antioxidant II) (TSA II) (Thioredoxin peroxidase type II) (Thioredoxin reductase type II)	ZRT2 YLR130C L3120 L9606.9	422	integral component of membrane [GO:0016021]; plasma membrane [GO:0005886]; low-affinity zinc ion transmembrane transporter activity [GO:0000007]; low-affinity zinc II ion transport [GO:0006831]	integral component of membrane [GO:0016021]; plasma membrane [GO:0005886]	low-affinity zinc II ion transport [GO:0006831]	low-affinity zinc ion transmembrane transporter activity [GO:0000007]
PDC5	350.4905951	81.24723252	2.108985155	9.04E-15	1.31E-12	Q12418	AHP1_YEAST	Zinc-regulated transporter 2 (Low-affinity zinc transport protein ZRT2)	PDC5 YLR134W L3133 L9606.7	563	cytoplasm [GO:0005737]; nucleus [GO:0005634]; branched-chain-2-oxoacid decarboxylase activity [GO:0047433]; magnesium ion binding [GO:0000287]; pyruvate decarboxylase activity [GO:0004737]; thiamine pyrophosphate binding [GO:0030976]; aromatic amino acid family catabolic process to alcohol via Ehrlich pathway [GO:0000949]; branched-chain amino acid catabolic process [GO:0009083]; glycolytic ferme…	cytoplasm [GO:0005737]; nucleus [GO:0005634]	aromatic amino acid family catabolic process to alcohol via Ehrlich pathway [GO:0000949]; branched-chain amino acid catabolic process [GO:0009083]; glycolytic fermentation to ethanol [GO:0019655]; L-phenylalanine catabolic process [GO:0006559]; pyruvate metabolic process [GO:0006090]; tryptophan catabolic process [GO:0006569]	branched-chain-2-oxoacid decarboxylase activity [GO:0047433]; magnesium ion binding [GO:0000287]; pyruvate decarboxylase activity [GO:0004737]; thiamine pyrophosphate binding [GO:0030976]
PUT1	357.1555116	228.5559462	0.644005032	0.001418357	0.022736075	P38013	ZRT2_YEAST	Pyruvate decarboxylase isozyme 2 (EC 4.1.1.-) (EC 4.1.1.1)	PUT1 YLR142W L3170 L9606.2	476	mitochondrial matrix [GO:0005759]; mitochondrion [GO:0005739]; FAD binding [GO:0071949]; proline dehydrogenase activity [GO:0004657]; glutamate biosynthetic process [GO:0006537]; proline catabolic process to glutamate [GO:0010133]	mitochondrial matrix [GO:0005759]; mitochondrion [GO:0005739]	glutamate biosynthetic process [GO:0006537]; proline catabolic process to glutamate [GO:0010133]	FAD binding [GO:0071949]; proline dehydrogenase activity [GO:0004657]
CPR6	1634.62894	575.9797015	1.504873307	2.92E-21	1.21E-18	Q12436	PDC5_YEAST	Proline dehydrogenase, mitochondrial (EC 1.5.5.2) (Proline oxidase)	CPR6 YLR216C L8167.24	371	cytoplasm [GO:0005737]; peptidyl-prolyl cis-trans isomerase activity [GO:0003755]; ribosome binding [GO:0043022]; unfolded protein binding [GO:0051082]; protein folding [GO:0006457]; protein refolding [GO:0042026]	cytoplasm [GO:0005737]	protein folding [GO:0006457]; protein refolding [GO:0042026]	peptidyl-prolyl cis-trans isomerase activity [GO:0003755]; ribosome binding [GO:0043022]; unfolded protein binding [GO:0051082]
THI7	342.8656415	197.4156825	0.796406738	0.00019868	0.004358495	P16467	PUT1_YEAST	Peptidyl-prolyl cis-trans isomerase CPR6 (PPIase CPR6) (EC 5.2.1.8) (Rotamase CPR6)	THI7 THI10 YLR237W L8083.2	598	integral component of membrane [GO:0016021]; plasma membrane [GO:0005886]; 5-amino-1-ribofuranosylimidazole-4-carboxamide transporter activity [GO:1903089]; nucleobase transmembrane transporter activity [GO:0015205]; thiamine transmembrane transporter activity [GO:0015234]; 5-amino-1-ribofuranosylimidazole-4-carboxamide transmembrane transport [GO:1903088]; nucleobase transport [GO:0015851]; thia…	integral component of membrane [GO:0016021]; plasma membrane [GO:0005886]	5-amino-1-ribofuranosylimidazole-4-carboxamide transmembrane transport [GO:1903088]; nucleobase transport [GO:0015851]; thiamine transport [GO:0015888]	5-amino-1-ribofuranosylimidazole-4-carboxamide transporter activity [GO:1903089]; nucleobase transmembrane transporter activity [GO:0015205]; thiamine transmembrane transporter activity [GO:0015234]
HAP1	619.6122098	282.5134743	1.133045896	7.70E-09	4.70E-07	P09368	PPID_YEAST	Thiamine transporter	HAP1 CYP1 YLR256W L9672.1	1502	mitochondrion [GO:0005739]; nucleus [GO:0005634]; RNA polymerase II core promoter proximal region sequence-specific DNA binding [GO:0000978]; transcriptional activator activity, RNA polymerase II core promoter proximal region sequence-specific binding [GO:0001077]; zinc ion binding [GO:0008270]; carbon catabolite activation of transcription from RNA polymerase II promoter [GO:0000436]; establishm…	mitochondrion [GO:0005739]; nucleus [GO:0005634]	carbon catabolite activation of transcription from RNA polymerase II promoter [GO:0000436]; establishment of protein localization to chromatin [GO:0071169]; negative regulation of transcription from RNA polymerase II promoter in response to hypoxia [GO:0061428]; regulation of cellular respiration [GO:0043457]	RNA polymerase II core promoter proximal region sequence-specific DNA binding [GO:0000978]; transcriptional activator activity, RNA polymerase II core promoter proximal region sequence-specific binding [GO:0001077]; zinc ion binding [GO:0008270]
HSP60	469.0874053	246.2221939	0.929895957	3.43E-06	0.000121811	P53691	THI7_YEAST	Elongator complex protein 4 (Gamma-toxin target 7) (HAT-associated protein 1)	HSP60 MIF4 YLR259C L8479.10	572	cytosol [GO:0005829]; mitochondrial inner membrane [GO:0005743]; mitochondrial intermembrane space [GO:0005758]; mitochondrial matrix [GO:0005759]; mitochondrial nucleoid [GO:0042645]; mitochondrion [GO:0005739]; ATP binding [GO:0005524]; ATPase activity [GO:0016887]; chaperone binding [GO:0051087]; DNA replication origin binding [GO:0003688]; protein binding involved in protein folding [GO:00441…	cytosol [GO:0005829]; mitochondrial inner membrane [GO:0005743]; mitochondrial intermembrane space [GO:0005758]; mitochondrial matrix [GO:0005759]; mitochondrial nucleoid [GO:0042645]; mitochondrion [GO:0005739]	'de novo' protein folding [GO:0006458]; apoptotic mitochondrial changes [GO:0008637]; chaperone-mediated protein complex assembly [GO:0051131]; chaperone-mediated protein folding [GO:0061077]; protein import into mitochondrial intermembrane space [GO:0045041]; protein maturation [GO:0051604]; protein refolding [GO:0042026]; protein stabilization [GO:0050821]; protein targeting to mitochondrion [G…	ATPase activity [GO:0016887]; ATP binding [GO:0005524]; chaperone binding [GO:0051087]; DNA replication origin binding [GO:0003688]; protein binding involved in protein folding [GO:0044183]; single-stranded DNA binding [GO:0003697]; unfolded protein binding [GO:0051082]
YLR271W	435.0543091	130.9747441	1.731906865	4.32E-14	5.52E-12	Q05998	HAP1_YEAST	Heat shock protein 60, mitochondrial (CPN60) (P66) (Stimulator factor I 66 kDa component)	YLR271W	274	cytoplasm [GO:0005737]; kinetochore [GO:0000776]; nucleus [GO:0005634]; nucleic acid binding [GO:0003676]	cytoplasm [GO:0005737]; kinetochore [GO:0000776]; nucleus [GO:0005634]		nucleic acid binding [GO:0003676]
YLR294C	515.6147193	253.224157	1.025878408	2.46E-07	1.14E-05	P0CE41	ELP4_YEAST	Uncharacterized protein YLR271W	YLR294C L8003.19A	109	integral component of membrane [GO:0016021]; cellular respiration [GO:0045333]	integral component of membrane [GO:0016021]	cellular respiration [GO:0045333]
ATP14	841.8326188	444.6225181	0.920952395	4.71E-07	2.04E-05	Q02884	HSP60_YEAST	Putative uncharacterized protein YLR294C	ATP14 YLR295C L8003.20	124	mitochondrial proton-transporting ATP synthase complex, coupling factor F(o) [GO:0000276]; ATP hydrolysis coupled cation transmembrane transport [GO:0099132]; ATP synthesis coupled proton transport [GO:0015986]; cristae formation [GO:0042407]; mitochondrial proton-transporting ATP synthase complex assembly [GO:0033615]	mitochondrial proton-transporting ATP synthase complex, coupling factor F(o) [GO:0000276]	ATP hydrolysis coupled cation transmembrane transport [GO:0099132]; ATP synthesis coupled proton transport [GO:0015986]; cristae formation [GO:0042407]; mitochondrial proton-transporting ATP synthase complex assembly [GO:0033615]
YLR302C	197.4146767	72.99980278	1.435264779	1.13E-06	4.58E-05	P19882	YL271_YEAST	ATP synthase subunit H, mitochondrial	YLR302C	120	integral component of membrane [GO:0016021]	integral component of membrane [GO:0016021]
TMA10	5504.23189	3182.223031	0.790506298	1.75E-08	1.05E-06	Q06152	YL294_YEAST	Uncharacterized protein YLR302C	TMA10 YLR327C L8543.1	86	mitochondrion [GO:0005739]	mitochondrion [GO:0005739]
STP3	196.4822207	81.56126203	1.268442768	1.34E-05	0.000400811	O13543	ATP14_YEAST	Translation machinery-associated protein 10	STP3 YLR375W	343	nucleus [GO:0005634]; metal ion binding [GO:0046872]; sequence-specific DNA binding [GO:0043565]	nucleus [GO:0005634]		metal ion binding [GO:0046872]; sequence-specific DNA binding [GO:0043565]
CCW14	253.5173635	138.2922277	0.874364485	0.000428542	0.008477741	Q12349	YL302_YEAST	Zinc finger protein STP3	CCW14 ICWP SSR1 YLR390W-A YLR391W-A	238	anchored component of membrane [GO:0031225]; extracellular region [GO:0005576]; fungal-type cell wall [GO:0009277]; structural constituent of cell wall [GO:0005199]; fungal-type cell wall organization [GO:0031505]	anchored component of membrane [GO:0031225]; extracellular region [GO:0005576]; fungal-type cell wall [GO:0009277]	fungal-type cell wall organization [GO:0031505]	structural constituent of cell wall [GO:0005199]
COX8	731.6741499	462.1611876	0.662805182	0.000233427	0.004973035	O13544	TMA10_YEAST	Covalently-linked cell wall protein 14 (Inner cell wall protein)	COX8 YLR395C L8084.14	78	mitochondrial respiratory chain complex IV [GO:0005751]; cytochrome-c oxidase activity [GO:0004129]; mitochondrial electron transport, cytochrome c to oxygen [GO:0006123]	mitochondrial respiratory chain complex IV [GO:0005751]	mitochondrial electron transport, cytochrome c to oxygen [GO:0006123]	cytochrome-c oxidase activity [GO:0004129]
VIP1	217.1198795	88.59951881	1.293121057	6.87E-06	0.000225225	Q06177	STP3_YEAST	Cytochrome c oxidase polypeptide VIII, mitochondrial (EC 1.9.3.1)	VIP1 YLR410W	1146	cytoskeleton [GO:0005856]; cytosol [GO:0005829]; acid phosphatase activity [GO:0003993]; ATP binding [GO:0005524]; diphosphoinositol-pentakisphosphate kinase activity [GO:0033857]; inositol heptakisphosphate kinase activity [GO:0000829]; inositol hexakisphosphate 1-kinase activity [GO:0052723]; inositol hexakisphosphate 3-kinase activity [GO:0052724]; inositol hexakisphosphate 4-kinase activity […	cytoskeleton [GO:0005856]; cytosol [GO:0005829]	inositol metabolic process [GO:0006020]; inositol phosphate biosynthetic process [GO:0032958]; regulation of bipolar cell growth [GO:0051516]; regulation of cell growth [GO:0001558]; regulation of microtubule cytoskeleton organization [GO:0070507]	acid phosphatase activity [GO:0003993]; ATP binding [GO:0005524]; diphosphoinositol-pentakisphosphate kinase activity [GO:0033857]; inositol heptakisphosphate kinase activity [GO:0000829]; inositol hexakisphosphate 1-kinase activity [GO:0052723]; inositol hexakisphosphate 3-kinase activity [GO:0052724]; inositol hexakisphosphate 4-kinase activity [GO:0000830]; inositol hexakisphosphate 5-kinase a…
YLR455W	103.1196607	37.24708327	1.469120061	0.000223521	0.004808243	Q05937	CCW14_YEAST	Inositol hexakisphosphate and diphosphoinositol-pentakisphosphate kinase (EC 2.7.4.21) (EC 2.7.4.24) (InsP6 and PP-IP5 kinase)	YLR455W	304	cytosol [GO:0005829]; NuA3 histone acetyltransferase complex [GO:0033100]; NuA3b histone acetyltransferase complex [GO:1990468]; nucleus [GO:0005634]; chromatin binding [GO:0003682]; positive regulation of transcription elongation from RNA polymerase II promoter [GO:0032968]	cytosol [GO:0005829]; NuA3b histone acetyltransferase complex [GO:1990468]; NuA3 histone acetyltransferase complex [GO:0033100]; nucleus [GO:0005634]	positive regulation of transcription elongation from RNA polymerase II promoter [GO:0032968]	chromatin binding [GO:0003682]
ERO1	287.1243506	138.0085279	1.056918271	3.06E-05	0.000842495	O13547	COX8_YEAST	PWWP domain-containing protein YLR455W	ERO1 YML130C YM4987.05C	563	endoplasmic reticulum [GO:0005783]; endoplasmic reticulum membrane [GO:0005789]; oxidoreductase activity, acting on a sulfur group of donors, disulfide as acceptor [GO:0016671]; protein disulfide isomerase activity [GO:0003756]; protein disulfide oxidoreductase activity [GO:0015035]; thiol oxidase activity [GO:0016972]; cellular protein modification process [GO:0006464]; oxidation-reduction proce…	endoplasmic reticulum [GO:0005783]; endoplasmic reticulum membrane [GO:0005789]	cellular protein modification process [GO:0006464]; oxidation-reduction process [GO:0055114]; protein folding in endoplasmic reticulum [GO:0034975]	oxidoreductase activity, acting on a sulfur group of donors, disulfide as acceptor [GO:0016671]; protein disulfide isomerase activity [GO:0003756]; protein disulfide oxidoreductase activity [GO:0015035]; thiol oxidase activity [GO:0016972]
PHO84	290.6548685	116.1381203	1.323465485	4.13E-07	1.83E-05	P04039	VIP1_YEAST	Endoplasmic oxidoreductin-1 (EC 1.8.4.-) (Endoplasmic reticulum oxidoreductase protein 1)	PHO84 YML123C YM7056.03C	587	integral component of plasma membrane [GO:0005887]; inorganic phosphate transmembrane transporter activity [GO:0005315]; manganese ion transmembrane transporter activity [GO:0005384]; selenite:proton symporter activity [GO:0097079]; manganese ion transport [GO:0006828]; phosphate ion transport [GO:0006817]; plasma membrane selenite transport [GO:0097080]; polyphosphate metabolic process [GO:00067…	integral component of plasma membrane [GO:0005887]	manganese ion transport [GO:0006828]; phosphate ion transport [GO:0006817]; plasma membrane selenite transport [GO:0097080]; polyphosphate metabolic process [GO:0006797]; positive regulation of replicative senescence [GO:1904728]	inorganic phosphate transmembrane transporter activity [GO:0005315]; manganese ion transmembrane transporter activity [GO:0005384]; selenite:proton symporter activity [GO:0097079]
NDI1	460.1038866	180.7688791	1.347813317	2.12E-10	1.68E-08	Q06685	YL455_YEAST	Inorganic phosphate transporter PHO84	NDI1 YML120C YM7056.06C	513	mitochondrial inner membrane [GO:0005743]; mitochondrial matrix [GO:0005759]; mitochondrion [GO:0005739]; NADH dehydrogenase (ubiquinone) activity [GO:0008137]; chronological cell aging [GO:0001300]; mitochondrial electron transport, NADH to ubiquinone [GO:0006120]; NADH oxidation [GO:0006116]; positive regulation of apoptotic process [GO:0043065]	mitochondrial inner membrane [GO:0005743]; mitochondrial matrix [GO:0005759]; mitochondrion [GO:0005739]	chronological cell aging [GO:0001300]; mitochondrial electron transport, NADH to ubiquinone [GO:0006120]; NADH oxidation [GO:0006116]; positive regulation of apoptotic process [GO:0043065]	NADH dehydrogenase (ubiquinone) activity [GO:0008137]
ATP18	1921.513017	1166.669349	0.719847012	2.68E-06	9.80E-05	Q06188	ERO1_YEAST	Rotenone-insensitive NADH-ubiquinone oxidoreductase, mitochondrial (EC 1.6.5.9) (Internal NADH dehydrogenase) (NADH:ubiquinone reductase (non-electrogenic))	ATP18 YML081C-A YML081BC	59	integral component of membrane [GO:0016021]; mitochondrial proton-transporting ATP synthase complex [GO:0005753]; mitochondrial proton-transporting ATP synthase complex, coupling factor F(o) [GO:0000276]; hydrogen ion transmembrane transporter activity [GO:0015078]; ATP hydrolysis coupled cation transmembrane transport [GO:0099132]; ATP synthesis coupled proton transport [GO:0015986]; mitochondri…	integral component of membrane [GO:0016021]; mitochondrial proton-transporting ATP synthase complex [GO:0005753]; mitochondrial proton-transporting ATP synthase complex, coupling factor F(o) [GO:0000276]	ATP hydrolysis coupled cation transmembrane transport [GO:0099132]; ATP synthesis coupled proton transport [GO:0015986]; mitochondrial proton-transporting ATP synthase complex assembly [GO:0033615]; protein complex oligomerization [GO:0035786]	hydrogen ion transmembrane transporter activity [GO:0015078]
ISF1	115.5503276	33.23712507	1.797653847	9.89E-06	0.000308719	Q03103	PHO84_YEAST	ATP synthase subunit J, mitochondrial (ATPase synthase I subunit)	ISF1 MBR3 YMR081C YM9582.06C	338	aerobic respiration [GO:0009060]		aerobic respiration [GO:0009060]
YMR090W	363.1383333	232.5296107	0.643104788	0.001337247	0.021744075	P25297	NDI1_YEAST	Increasing suppression factor 1 (Mitochondrial biogenesis regulation protein 3)	YMR090W YM9582.15	227	cytoplasm [GO:0005737]	cytoplasm [GO:0005737]
GID8	261.0867997	85.31934114	1.613584788	4.32E-09	2.79E-07	P32340	ATP18_YEAST	UPF0659 protein YMR090W	GID8 DCR1 YMR135C YM9375.04C	455	cytoplasm [GO:0005737]; GID complex [GO:0034657]; nucleus [GO:0005634]; cell cycle [GO:0007049]; negative regulation of gluconeogenesis [GO:0045721]; proteasome-mediated ubiquitin-dependent protein catabolic process [GO:0043161]; traversing start control point of mitotic cell cycle [GO:0007089]	cytoplasm [GO:0005737]; GID complex [GO:0034657]; nucleus [GO:0005634]	cell cycle [GO:0007049]; negative regulation of gluconeogenesis [GO:0045721]; proteasome-mediated ubiquitin-dependent protein catabolic process [GO:0043161]; traversing start control point of mitotic cell cycle [GO:0007089]
NDE1	225.7943037	138.0373666	0.709950234	0.00397067	0.049986829	P81450	ISF1_YEAST	Glucose-induced degradation protein 8 (Dosage-dependent cell cycle regulator 1)	NDE1 NDH1 YMR145C YM9375.14C	560	mitochondrial intermembrane space [GO:0005758]; mitochondrion [GO:0005739]; NADH dehydrogenase activity [GO:0003954]; chronological cell aging [GO:0001300]; glycolytic fermentation to ethanol [GO:0019655]; NADH oxidation [GO:0006116]	mitochondrial intermembrane space [GO:0005758]; mitochondrion [GO:0005739]	chronological cell aging [GO:0001300]; glycolytic fermentation to ethanol [GO:0019655]; NADH oxidation [GO:0006116]	NADH dehydrogenase activity [GO:0003954]
TPP1	124.0432951	48.29678924	1.360844569	0.000181173	0.004027609	P32488	YMY0_YEAST	External NADH-ubiquinone oxidoreductase 1, mitochondrial (EC 1.6.5.9) (External NADH dehydrogenase 1)	TPP1 YMR156C YM8520.05C	238	nucleus [GO:0005634]; ATP-dependent polydeoxyribonucleotide 5'-hydroxyl-kinase activity [GO:0046404]; double-stranded DNA binding [GO:0003690]; nucleotide kinase activity [GO:0019201]; polynucleotide 3'-phosphatase activity [GO:0046403]; DNA 3' dephosphorylation involved in DNA repair [GO:0098504]; double-strand break repair [GO:0006302]	nucleus [GO:0005634]	DNA 3' dephosphorylation involved in DNA repair [GO:0098504]; double-strand break repair [GO:0006302]	ATP-dependent polydeoxyribonucleotide 5'-hydroxyl-kinase activity [GO:0046404]; double-stranded DNA binding [GO:0003690]; nucleotide kinase activity [GO:0019201]; polynucleotide 3'-phosphatase activity [GO:0046403]
MRPS8	157.6312706	80.79816981	0.964159243	0.001644253	0.025655755	Q04304	GID8_YEAST	Polynucleotide 3'-phosphatase (EC 3.1.3.32) (2'(3')-polynucleotidase) (DNA 3'-phosphatase) (Three prime phosphatase)	MRPS8 YMR158W YM8520.07	155	cytosolic small ribosomal subunit [GO:0022627]; mitochondrial small ribosomal subunit [GO:0005763]; structural constituent of ribosome [GO:0003735]; mitochondrial translation [GO:0032543]	cytosolic small ribosomal subunit [GO:0022627]; mitochondrial small ribosomal subunit [GO:0005763]	mitochondrial translation [GO:0032543]	structural constituent of ribosome [GO:0003735]
DDR48	1063.334072	638.0906882	0.73676154	8.23E-07	3.42E-05	P40208	NDH1_YEAST	37S ribosomal protein S8, mitochondrial (Mitochondrial small ribosomal subunit protein uS8m)	DDR48 FSP YMR173W YM8010.03	430	ATPase activity [GO:0016887]; GTPase activity [GO:0003924]; cellular response to oxidative stress [GO:0034599]; DNA repair [GO:0006281]		cellular response to oxidative stress [GO:0034599]; DNA repair [GO:0006281]	ATPase activity [GO:0016887]; GTPase activity [GO:0003924]
YMR173W-A	1041.126402	630.0677898	0.724566271	1.38E-06	5.47E-05	P40215	TPP1_YEAST	Stress protein DDR48 (DNA damage-responsive protein 48) (DDRP 48) (Flocculent-specific protein) (YP 75)	YMR173W-A	394	integral component of membrane [GO:0016021]	integral component of membrane [GO:0016021]
YMR181C	302.4657449	149.6286154	1.015385655	2.84E-05	0.000793919	Q03796	RT08_YEAST	Putative uncharacterized membrane protein YMR173W-A	YMR181C YM8010.11C	154
MRPS17	320.2095503	194.4935784	0.719293814	0.000750596	0.013269184	Q03799	DDR48_YEAST	Uncharacterized protein YMR181C	MRPS17 YMR188C YM8010.18C	237	cytosolic small ribosomal subunit [GO:0022627]; mitochondrial small ribosomal subunit [GO:0005763]; rRNA binding [GO:0019843]; structural constituent of ribosome [GO:0003735]; mitochondrial translation [GO:0032543]; sporulation resulting in formation of a cellular spore [GO:0030435]; translation [GO:0006412]	cytosolic small ribosomal subunit [GO:0022627]; mitochondrial small ribosomal subunit [GO:0005763]	mitochondrial translation [GO:0032543]; sporulation resulting in formation of a cellular spore [GO:0030435]; translation [GO:0006412]	rRNA binding [GO:0019843]; structural constituent of ribosome [GO:0003735]
ICY1	787.8893891	535.0030824	0.558445902	0.000872532	0.015182516	P18899	YM173_YEAST	37S ribosomal protein S17, mitochondrial (Mitochondrial small ribosomal subunit protein uS17m)	ICY1 YMR195W YM9646.08	127	vacuolar membrane [GO:0005774]	vacuolar membrane [GO:0005774]
HOR7	8229.396174	4315.604937	0.931223775	1.59E-12	1.68E-10	A0A023PXQ4	YM46_YEAST	Interacting with cytoskeleton protein 1	HOR7 YMR251W-A YMR251BW	59	plasma membrane [GO:0005886]; plasma membrane organization [GO:0007009]	plasma membrane [GO:0005886]	plasma membrane organization [GO:0007009]
YMR252C	237.4471975	115.1823174	1.043687475	6.40E-05	0.001606362	Q03231	RT17_YEAST	Protein HOR7 (Protein A0.5)	YMR252C YM9920.06C	134
COX7	1940.623149	1221.684697	0.667647998	1.26E-05	0.000386712	Q03246	ICY1_YEAST	Uncharacterized protein YMR252C	COX7 YMR256C YM9920.10C	60	integral component of membrane [GO:0016021]; mitochondrial respiratory chain complex IV [GO:0005751]; cytochrome-c oxidase activity [GO:0004129]; mitochondrial electron transport, cytochrome c to oxygen [GO:0006123]	integral component of membrane [GO:0016021]; mitochondrial respiratory chain complex IV [GO:0005751]	mitochondrial electron transport, cytochrome c to oxygen [GO:0006123]	cytochrome-c oxidase activity [GO:0004129]
SAP30	87.99622884	33.42834473	1.396369778	0.00139753	0.022492457	Q04329	HOR7_YEAST	Cytochrome c oxidase subunit 7 (EC 1.9.3.1) (Cytochrome c oxidase polypeptide VII)	SAP30 YMR263W YM8156.05	201	histone deacetylase complex [GO:0000118]; Rpd3L complex [GO:0033698]; histone deacetylase activity [GO:0004407]; transcription cofactor activity [GO:0003712]; negative regulation of chromatin silencing at rDNA [GO:0061188]; negative regulation of chromatin silencing at silent mating-type cassette [GO:0061186]; negative regulation of chromatin silencing at telomere [GO:0031939]; negative regulatio…	histone deacetylase complex [GO:0000118]; Rpd3L complex [GO:0033698]	negative regulation of chromatin silencing at rDNA [GO:0061188]; negative regulation of chromatin silencing at silent mating-type cassette [GO:0061186]; negative regulation of chromatin silencing at telomere [GO:0031939]; negative regulation of transcription from RNA polymerase I promoter [GO:0016479]; positive regulation of invasive growth in response to glucose limitation [GO:2000219]; positive…	histone deacetylase activity [GO:0004407]; transcription cofactor activity [GO:0003712]
URA10	520.1376729	258.6996402	1.007615486	3.70E-07	1.68E-05	Q05827	YM86_YEAST	Transcriptional regulatory protein SAP30	URA10 YMR271C YM8156.13C	227	orotate phosphoribosyltransferase activity [GO:0004588]; 'de novo' pyrimidine nucleobase biosynthetic process [GO:0006207]; 'de novo' UMP biosynthetic process [GO:0044205]; pyrimidine ribonucleoside biosynthetic process [GO:0046132]		'de novo' pyrimidine nucleobase biosynthetic process [GO:0006207]; 'de novo' UMP biosynthetic process [GO:0044205]; pyrimidine ribonucleoside biosynthetic process [GO:0046132]	orotate phosphoribosyltransferase activity [GO:0004588]
SCS7	224.15985	129.9538088	0.786528977	0.00179935	0.027621886	Q04814	COX7_YEAST	Orotate phosphoribosyltransferase 2 (OPRT 2) (OPRTase 2) (EC 2.4.2.10)	SCS7 FAH1 YMR272C YM8156.14C	384	endoplasmic reticulum membrane [GO:0005789]; integral component of membrane [GO:0016021]; membrane [GO:0016020]; fatty acid alpha-hydroxylase activity [GO:0080132]; heme binding [GO:0020037]; iron ion binding [GO:0005506]; fatty acid biosynthetic process [GO:0006633]; fatty acid metabolic process [GO:0006631]; inositolphosphoceramide metabolic process [GO:0006673]	endoplasmic reticulum membrane [GO:0005789]; integral component of membrane [GO:0016021]; membrane [GO:0016020]	fatty acid biosynthetic process [GO:0006633]; fatty acid metabolic process [GO:0006631]; inositolphosphoceramide metabolic process [GO:0006673]	fatty acid alpha-hydroxylase activity [GO:0080132]; heme binding [GO:0020037]; iron ion binding [GO:0005506]
MRPL33	184.376444	100.2181154	0.879511035	0.001619641	0.025331187	P10174	SAP30_YEAST	Ceramide very long chain fatty acid hydroxylase SCS7 (Ceramide VLCFA hydroxylase SCS7) (EC 1.-.-.-) (Suppressor of calcium sensitivity 7)	MRPL33 YMR286W YM8021.12	86	mitochondrial large ribosomal subunit [GO:0005762]; structural constituent of ribosome [GO:0003735]; mitochondrial translation [GO:0032543]	mitochondrial large ribosomal subunit [GO:0005762]	mitochondrial translation [GO:0032543]	structural constituent of ribosome [GO:0003735]
FET4	204.1051207	93.46981777	1.126739892	6.56E-05	0.001640265	P38429	PYRX_YEAST	54S ribosomal protein L33, mitochondrial (Mitochondrial large ribosomal subunit protein uL30m) (YmL33)	FET4 YMR319C YM9924.11C	552	integral component of plasma membrane [GO:0005887]; intracellular [GO:0005622]; plasma membrane [GO:0005886]; copper ion transmembrane transporter activity [GO:0005375]; iron ion transmembrane transporter activity [GO:0005381]; copper ion import [GO:0015677]; intracellular copper ion transport [GO:0015680]; iron ion homeostasis [GO:0055072]; low-affinity iron ion transmembrane transport [GO:00000…	integral component of plasma membrane [GO:0005887]; intracellular [GO:0005622]; plasma membrane [GO:0005886]	copper ion import [GO:0015677]; intracellular copper ion transport [GO:0015680]; iron ion homeostasis [GO:0055072]; low-affinity iron ion transmembrane transport [GO:0000040]; zinc II ion transport [GO:0006829]	copper ion transmembrane transporter activity [GO:0005375]; iron ion transmembrane transporter activity [GO:0005381]
THI12	600.7325353	145.1407558	2.049270113	5.33E-21	2.09E-18	P30402	SCS7_YEAST	Low-affinity Fe(2+) transport protein (Low-affinity Fe(II) transport protein)	THI12 YNL332W N0295	340	thiamine biosynthetic process [GO:0009228]; thiamine diphosphate biosynthetic process [GO:0009229]		thiamine biosynthetic process [GO:0009228]; thiamine diphosphate biosynthetic process [GO:0009229]
KRE1	173.0006012	77.32677248	1.161737149	0.000127552	0.00297486	Q03529	RM33_YEAST	4-amino-5-hydroxymethyl-2-methylpyrimidine phosphate synthase THI12 (HMP-P synthase) (Hydroxymethylpyrimidine phosphate synthase) (Thiamine biosynthesis protein 12) (Thiamine pyrimidine synthase)	KRE1 YNL322C N0336	313	anchored component of membrane [GO:0031225]; extracellular region [GO:0005576]; fungal-type cell wall [GO:0009277]; plasma membrane [GO:0005886]; structural constituent of cell wall [GO:0005199]; fungal-type cell wall organization [GO:0031505]	anchored component of membrane [GO:0031225]; extracellular region [GO:0005576]; fungal-type cell wall [GO:0009277]; plasma membrane [GO:0005886]	fungal-type cell wall organization [GO:0031505]	structural constituent of cell wall [GO:0005199]
GOR1	148.4529082	72.0788026	1.042358407	0.000972429	0.016573676	P20084	FET4_YEAST	Protein KRE1 (Killer toxin-resistance protein 1)	GOR1 YNL274C N0631	350	cytosol [GO:0005829]; mitochondrion [GO:0005739]; nucleus [GO:0005634]; glyoxylate reductase (NADP) activity [GO:0030267]; glyoxylate reductase activity [GO:0047964]; hydroxypyruvate reductase activity [GO:0016618]; NAD binding [GO:0051287]; oxidoreductase activity, acting on the CH-OH group of donors, NAD or NADP as acceptor [GO:0016616]; protein homodimerization activity [GO:0042803]; transcrip…	cytosol [GO:0005829]; mitochondrion [GO:0005739]; nucleus [GO:0005634]	glyoxylate catabolic process [GO:0009436]	glyoxylate reductase (NADP) activity [GO:0030267]; glyoxylate reductase activity [GO:0047964]; hydroxypyruvate reductase activity [GO:0016618]; NAD binding [GO:0051287]; oxidoreductase activity, acting on the CH-OH group of donors, NAD or NADP as acceptor [GO:0016616]; protein homodimerization activity [GO:0042803]; transcription corepressor activity [GO:0003714]
ZWF1	458.8655522	311.3296585	0.559628485	0.002256685	0.032609098	P40988	THI12_YEAST	Glyoxylate reductase 1 (EC 1.1.1.26)	ZWF1 MET19 YNL241C N1110	505	glucose-6-phosphate dehydrogenase activity [GO:0004345]; NADP binding [GO:0050661]; glucose metabolic process [GO:0006006]; NADPH regeneration [GO:0006740]; pentose-phosphate shunt, oxidative branch [GO:0009051]; response to hydrogen peroxide [GO:0042542]		glucose metabolic process [GO:0006006]; NADPH regeneration [GO:0006740]; pentose-phosphate shunt, oxidative branch [GO:0009051]; response to hydrogen peroxide [GO:0042542]	glucose-6-phosphate dehydrogenase activity [GO:0004345]; NADP binding [GO:0050661]
YNL200C	270.8516626	165.6396095	0.70945524	0.002877025	0.038626062	P42883	KRE1_YEAST	Glucose-6-phosphate 1-dehydrogenase (G6PD) (EC 1.1.1.49)	YNL200C N1370	246	mitochondrion [GO:0005739]; metal ion binding [GO:0046872]; NADHX epimerase activity [GO:0052856]; NADPHX epimerase activity [GO:0052857]; nucleotide binding [GO:0000166]; NADH metabolic process [GO:0006734]; NADP metabolic process [GO:0006739]; nicotinamide nucleotide metabolic process [GO:0046496]	mitochondrion [GO:0005739]	NADH metabolic process [GO:0006734]; NADP metabolic process [GO:0006739]; nicotinamide nucleotide metabolic process [GO:0046496]	metal ion binding [GO:0046872]; NADHX epimerase activity [GO:0052856]; NADPHX epimerase activity [GO:0052857]; nucleotide binding [GO:0000166]
DUG3	372.9542513	203.1748656	0.876276733	3.28E-05	0.00088754	P17260	GOR1_YEAST	NAD(P)H-hydrate epimerase (EC 5.1.99.6) (NAD(P)HX epimerase)	DUG3 YNL191W N1410	357	cytoplasm [GO:0005737]; glutathione hydrolase complex [GO:0061672]; amidophosphoribosyltransferase activity [GO:0004044]; omega peptidase activity [GO:0008242]; peptidase activity [GO:0008233]; glutamine metabolic process [GO:0006541]; glutathione catabolic process [GO:0006751]	cytoplasm [GO:0005737]; glutathione hydrolase complex [GO:0061672]	glutamine metabolic process [GO:0006541]; glutathione catabolic process [GO:0006751]	amidophosphoribosyltransferase activity [GO:0004044]; omega peptidase activity [GO:0008242]; peptidase activity [GO:0008233]
YNL190W	287.7619063	174.2983173	0.72331698	0.001709876	0.02637017	P53839	G6PD_YEAST	Probable glutamine amidotransferase DUG3 (Deficient in utilization of glutathione protein 3) (GSH degradosomal complex subunit DUG3)	YNL190W N1415	204	anchored component of membrane [GO:0031225]; extracellular region [GO:0005576]; fungal-type cell wall [GO:0009277]; cellular response to water deprivation [GO:0042631]	anchored component of membrane [GO:0031225]; extracellular region [GO:0005576]; fungal-type cell wall [GO:0009277]	cellular response to water deprivation [GO:0042631]
YGP1	1675.644972	798.5400053	1.069279919	3.21E-12	3.24E-10	P11412	NNRE_YEAST	Hydrophilin YNL190W	YGP1 YNL160W N1731	354	extracellular region [GO:0005576]; asparaginase activity [GO:0004067]; asparagine catabolic process [GO:0006530]; cell wall assembly [GO:0070726]	extracellular region [GO:0005576]	asparagine catabolic process [GO:0006530]; cell wall assembly [GO:0070726]	asparaginase activity [GO:0004067]
YNL144C	179.0733925	65.2939159	1.455530519	4.24E-06	0.000148408	P40165	DUG3_YEAST	Protein YGP1 (GP38)	YNL144C N1205 N1790	740
NAF1	95.97517124	36.32459209	1.401714632	0.000855847	0.014931265	P53871	PGA14_YEAST	Uncharacterized protein YNL144C	NAF1 YNL124W N1888	492	intracellular ribonucleoprotein complex [GO:0030529]; nucleoplasm [GO:0005654]; nucleus [GO:0005634]; RNA binding [GO:0003723]; box H/ACA snoRNP assembly [GO:0000493]; pseudouridine synthesis [GO:0001522]; rRNA processing [GO:0006364]	intracellular ribonucleoprotein complex [GO:0030529]; nucleoplasm [GO:0005654]; nucleus [GO:0005634]	box H/ACA snoRNP assembly [GO:0000493]; pseudouridine synthesis [GO:0001522]; rRNA processing [GO:0006364]	RNA binding [GO:0003723]
APJ1	354.4039293	153.8934347	1.203462913	1.17E-07	5.67E-06	P53872	YGP1_YEAST	H/ACA ribonucleoprotein complex non-core subunit NAF1 (Nuclear assembly factor 1)	APJ1 YNL077W N2342	528	cytoplasm [GO:0005737]; nuclear periphery [GO:0034399]; ATPase activator activity [GO:0001671]; heat shock protein binding [GO:0031072]; metal ion binding [GO:0046872]; unfolded protein binding [GO:0051082]; protein folding [GO:0006457]; protein sumoylation [GO:0016925]	cytoplasm [GO:0005737]; nuclear periphery [GO:0034399]	protein folding [GO:0006457]; protein sumoylation [GO:0016925]	ATPase activator activity [GO:0001671]; heat shock protein binding [GO:0031072]; metal ion binding [GO:0046872]; unfolded protein binding [GO:0051082]
COX5A	741.4589158	354.6211156	1.064088312	5.39E-08	2.84E-06	P38616	YNO4_YEAST	J domain-containing protein APJ1	COX5A YNL052W N2474 YNL2474W	153	mitochondrial inner membrane [GO:0005743]; mitochondrial intermembrane space [GO:0005758]; mitochondrial respiratory chain complex IV [GO:0005751]; cytochrome-c oxidase activity [GO:0004129]; mitochondrial electron transport, cytochrome c to oxygen [GO:0006123]; protein targeting to mitochondrion [GO:0006626]	mitochondrial inner membrane [GO:0005743]; mitochondrial intermembrane space [GO:0005758]; mitochondrial respiratory chain complex IV [GO:0005751]	mitochondrial electron transport, cytochrome c to oxygen [GO:0006123]; protein targeting to mitochondrion [GO:0006626]	cytochrome-c oxidase activity [GO:0004129]
YNL022C	122.0738643	41.96096526	1.540634585	4.01E-05	0.001050453	P53907	NAF1_YEAST	Cytochrome c oxidase polypeptide 5A, mitochondrial (EC 1.9.3.1) (Cytochrome c oxidase polypeptide Va)	RCM1 YNL022C N2815	490	nucleolus [GO:0005730]; nucleus [GO:0005634]; RNA binding [GO:0003723]; rRNA (cytosine-C5-)-methyltransferase activity [GO:0009383]; rRNA base methylation [GO:0070475]	nucleolus [GO:0005730]; nucleus [GO:0005634]	rRNA base methylation [GO:0070475]	RNA binding [GO:0003723]; rRNA (cytosine-C5-)-methyltransferase activity [GO:0009383]
SIS1	870.726271	468.1998928	0.895094648	5.40E-07	2.30E-05	P53919	APJ1_YEAST	25S rRNA (cytosine(2278)-C(5))-methyltransferase (EC 2.1.1.311) (rRNA m(5)C methyltransferase 1)	SIS1 YNL007C N2879	352	cytosolic small ribosomal subunit [GO:0022627]; nucleus [GO:0005634]; DNA binding [GO:0003677]; misfolded protein binding [GO:0051787]; unfolded protein binding [GO:0051082]; cell cycle [GO:0007049]; misfolded protein transport [GO:0070843]; protein folding [GO:0006457]; translational initiation [GO:0006413]; tRNA import into nucleus [GO:0035719]; ubiquitin-dependent catabolism of misfolded prote…	cytosolic small ribosomal subunit [GO:0022627]; nucleus [GO:0005634]	cell cycle [GO:0007049]; misfolded protein transport [GO:0070843]; protein folding [GO:0006457]; translational initiation [GO:0006413]; tRNA import into nucleus [GO:0035719]; ubiquitin-dependent catabolism of misfolded proteins by nucleus-associated proteasome [GO:0071630]	DNA binding [GO:0003677]; misfolded protein binding [GO:0051787]; unfolded protein binding [GO:0051082]
LST8	496.3255386	245.9081644	1.013167056	3.96E-07	1.78E-05	P53940	COX5A_YEAST	Protein SIS1	LST8 YNL006W N2005	303	endosome membrane [GO:0010008]; extrinsic component of cytoplasmic side of plasma membrane [GO:0031234]; Golgi membrane [GO:0000139]; nuclear periphery [GO:0034399]; TORC1 complex [GO:0031931]; TORC2 complex [GO:0031932]; vacuolar membrane [GO:0005774]; protein kinase activator activity [GO:0030295]; establishment or maintenance of actin cytoskeleton polarity [GO:0030950]; fungal-type cell wall o…	endosome membrane [GO:0010008]; extrinsic component of cytoplasmic side of plasma membrane [GO:0031234]; Golgi membrane [GO:0000139]; nuclear periphery [GO:0034399]; TORC1 complex [GO:0031931]; TORC2 complex [GO:0031932]; vacuolar membrane [GO:0005774]	establishment or maintenance of actin cytoskeleton polarity [GO:0030950]; fungal-type cell wall organization [GO:0031505]; mitochondria-nucleus signaling pathway [GO:0031930]; regulation of actin cytoskeleton organization [GO:0032956]; regulation of cell growth [GO:0001558]; signal transduction [GO:0007165]; TOR signaling [GO:0031929]	protein kinase activator activity [GO:0030295]
CSE2	112.4949203	30.37120742	1.889083689	4.83E-06	0.00016797	P00424	RCM1_YEAST	Target of rapamycin complex subunit LST8 (TORC subunit LST8) (Lethal with SEC13 protein 8)	CSE2 MED9 YNR010W N2046	149	core mediator complex [GO:0070847]; cytosol [GO:0005829]; mediator complex [GO:0016592]; nucleus [GO:0005634]; RNA polymerase II transcription coactivator activity involved in preinitiation complex assembly [GO:0001128]; structural molecule activity [GO:0005198]; negative regulation of transcription from RNA polymerase II promoter [GO:0000122]; positive regulation of transcription from RNA polyme…	core mediator complex [GO:0070847]; cytosol [GO:0005829]; mediator complex [GO:0016592]; nucleus [GO:0005634]	negative regulation of transcription from RNA polymerase II promoter [GO:0000122]; positive regulation of transcription from RNA polymerase II promoter [GO:0045944]	RNA polymerase II transcription coactivator activity involved in preinitiation complex assembly [GO:0001128]; structural molecule activity [GO:0005198]
YNR014W	241.4216737	103.6258713	1.220170969	4.85E-06	0.00016797	P53972	SIS1_YEAST	Mediator of RNA polymerase II transcription subunit 9 (Chromosome segregation protein 2) (Mediator complex subunit 9)	YNR014W N2060	212
YNR034W-A	2153.322457	947.6946015	1.184070252	1.10E-12	1.18E-10	P25294	LST8_YEAST	Uncharacterized protein YNR014W	YNR034W-A	98	cytosol [GO:0005829]	cytosol [GO:0005829]
YNR068C	74.60195374	20.50183569	1.863460322	0.000257122	0.00537449	P41318	MED9_YEAST	Uncharacterized protein YNR034W-A	YNR068C N3551	272	ubiquitin ligase complex [GO:0000151]; ubiquitin-ubiquitin ligase activity [GO:0034450]; protein monoubiquitination [GO:0006513]; protein polyubiquitination [GO:0000209]	ubiquitin ligase complex [GO:0000151]	protein monoubiquitination [GO:0006513]; protein polyubiquitination [GO:0000209]	ubiquitin-ubiquitin ligase activity [GO:0034450]
HPF1	136.1446095	32.75773264	2.055232454	7.29E-08	3.78E-06	P33308	YN87_YEAST	Uncharacterized protein YNR068C	HPF1 YOL155C AOF1001	967	anchored component of membrane [GO:0031225]; extracellular region [GO:0005576]; fungal-type cell wall [GO:0009277]; glucosidase activity [GO:0015926]; fungal-type cell wall organization [GO:0031505]	anchored component of membrane [GO:0031225]; extracellular region [GO:0005576]; fungal-type cell wall [GO:0009277]	fungal-type cell wall organization [GO:0031505]	glucosidase activity [GO:0015926]
ZPS1	4178.620891	3182.205702	0.392999778	0.002192548	0.031960226	P53719	YN034_YEAST	Haze protective factor 1	ZPS1 YOL154W AOB249	249	cell surface [GO:0009986]; extracellular region [GO:0005576]; fungal-type cell wall [GO:0009277]; integrin binding [GO:0005178]; metallopeptidase activity [GO:0008237]; zinc ion binding [GO:0008270]	cell surface [GO:0009986]; extracellular region [GO:0005576]; fungal-type cell wall [GO:0009277]		integrin binding [GO:0005178]; metallopeptidase activity [GO:0008237]; zinc ion binding [GO:0008270]
PFK27	93.45163839	24.73632525	1.917588764	3.13E-05	0.000855854	Q3E841	YN97_YEAST	Protein ZPS1	PFK27 YOL136C	397	cytoplasm [GO:0005737]; 6-phosphofructo-2-kinase activity [GO:0003873]; ATP binding [GO:0005524]; fructose 2,6-bisphosphate metabolic process [GO:0006003]; fructose metabolic process [GO:0006000]; regulation of glycolytic process [GO:0006110]	cytoplasm [GO:0005737]	fructose 2,6-bisphosphate metabolic process [GO:0006003]; fructose metabolic process [GO:0006000]; regulation of glycolytic process [GO:0006110]	6-phosphofructo-2-kinase activity [GO:0003873]; ATP binding [GO:0005524]
NUF2	27.94459332	0	Inf	0.002725234	0.037120138	P53754	HPF1_YEAST	6-phosphofructo-2-kinase 2 (6PF-2-K 2) (EC 2.7.1.105) (Phosphofructokinase 2 II)	NUF2 YOL069W	451	condensed nuclear chromosome kinetochore [GO:0000778]; condensed nuclear chromosome, centromeric region [GO:0000780]; Ndc80 complex [GO:0031262]; spindle microtubule [GO:0005876]; structural constituent of cytoskeleton [GO:0005200]; cell division [GO:0051301]; chromosome segregation [GO:0007059]; microtubule nucleation [GO:0007020]; mitotic cell cycle [GO:0000278]	condensed nuclear chromosome, centromeric region [GO:0000780]; condensed nuclear chromosome kinetochore [GO:0000778]; Ndc80 complex [GO:0031262]; spindle microtubule [GO:0005876]	cell division [GO:0051301]; chromosome segregation [GO:0007059]; microtubule nucleation [GO:0007020]; mitotic cell cycle [GO:0000278]	structural constituent of cytoskeleton [GO:0005200]
YOL014W	55.44969057	0	Inf	0.000521078	0.009896018	Q05164	ZPS1_YEAST	Kinetochore protein NUF2	YOL014W	124
PHO80	37.404469	0	Inf	0.001001547	0.016939652	Q12512	6P22_YEAST	Putative uncharacterized protein YOL014W	PHO80 AGS3 TUP7 VAC5 YOL001W O2505 UNB293	293	cyclin-dependent protein kinase holoenzyme complex [GO:0000307]; cytoplasm [GO:0005737]; nucleus [GO:0005634]; Pho85-Pho80 CDK-cyclin complex [GO:1990860]; cyclin-dependent protein serine/threonine kinase regulator activity [GO:0016538]; protein kinase binding [GO:0019901]; cellular metal ion homeostasis [GO:0006875]; negative regulation of calcium-mediated signaling [GO:0050849]; negative regula…	cyclin-dependent protein kinase holoenzyme complex [GO:0000307]; cytoplasm [GO:0005737]; nucleus [GO:0005634]; Pho85-Pho80 CDK-cyclin complex [GO:1990860]	cellular metal ion homeostasis [GO:0006875]; negative regulation of calcium-mediated signaling [GO:0050849]; negative regulation of macroautophagy [GO:0016242]; negative regulation of phosphate metabolic process [GO:0045936]; negative regulation of transcription from RNA polymerase II promoter [GO:0000122]; regulation of cyclin-dependent protein serine/threonine kinase activity [GO:0000079]; regu…	cyclin-dependent protein serine/threonine kinase regulator activity [GO:0016538]; protein kinase binding [GO:0019901]
SGT2	952.6206099	468.0116551	1.025357303	4.65E-09	2.97E-07	Q12471	NUF2_YEAST	PHO85 cyclin PHO80 (Aminoglycoside antibiotic sensitivity protein 3) (Phosphate system cyclin PHO80)	SGT2 YOR007C UNF346	346	TRC complex [GO:0072380]; protein complex scaffold [GO:0032947]; posttranslational protein targeting to endoplasmic reticulum membrane [GO:0006620]; response to heat [GO:0009408]	TRC complex [GO:0072380]	posttranslational protein targeting to endoplasmic reticulum membrane [GO:0006620]; response to heat [GO:0009408]	protein complex scaffold [GO:0032947]
HSP10	2192.333443	899.4358923	1.28537488	2.24E-14	2.92E-12	P33895	YO014_YEAST	Small glutamine-rich tetratricopeptide repeat-containing protein 2 (SGT/UBP) (Viral protein U-binding protein)	HSP10 CPN10 YOR020C OR26.10	106	mitochondrial matrix [GO:0005759]; ATP binding [GO:0005524]; chaperone binding [GO:0051087]; metal ion binding [GO:0046872]; unfolded protein binding [GO:0051082]; chaperone mediated protein folding requiring cofactor [GO:0051085]; chaperone-mediated protein complex assembly [GO:0051131]; protein folding [GO:0006457]; protein import into mitochondrial intermembrane space [GO:0045041]; protein ref…	mitochondrial matrix [GO:0005759]	chaperone-mediated protein complex assembly [GO:0051131]; chaperone mediated protein folding requiring cofactor [GO:0051085]; protein folding [GO:0006457]; protein import into mitochondrial intermembrane space [GO:0045041]; protein refolding [GO:0042026]; response to unfolded protein [GO:0006986]	ATP binding [GO:0005524]; chaperone binding [GO:0051087]; metal ion binding [GO:0046872]; unfolded protein binding [GO:0051082]
STI1	814.7325654	346.7243045	1.232537606	4.39E-10	3.25E-08	Q08110	PHO80_YEAST	10 kDa heat shock protein, mitochondrial (HSP10) (10 kDa chaperonin)	STI1 YOR027W OR26.17	589	cytoplasm [GO:0005737]; ATPase inhibitor activity [GO:0042030]; Hsp70 protein binding [GO:0030544]; Hsp90 protein binding [GO:0051879]; mRNA binding [GO:0003729]; protein folding [GO:0006457]; protein localization [GO:0008104]; protein targeting to mitochondrion [GO:0006626]	cytoplasm [GO:0005737]	protein folding [GO:0006457]; protein localization [GO:0008104]; protein targeting to mitochondrion [GO:0006626]	ATPase inhibitor activity [GO:0042030]; Hsp70 protein binding [GO:0030544]; Hsp90 protein binding [GO:0051879]; mRNA binding [GO:0003729]
CRS5	1492.950821	921.3045135	0.696416657	9.67E-07	3.97E-05	P20052	SGT2_YEAST	Heat shock protein STI1	CRS5 YOR031W O2675	69	cytoplasm [GO:0005737]; copper ion binding [GO:0005507]; response to metal ion [GO:0010038]	cytoplasm [GO:0005737]	response to metal ion [GO:0010038]	copper ion binding [GO:0005507]
CYT1	279.5370651	88.37647845	1.661305239	9.29E-10	6.57E-08	Q12118	CH10_YEAST	Metallothionein-like protein CRS5	CYT1 CTC1 YOR065W YOR29-16	309	cytosol [GO:0005829]; mitochondrial inner membrane [GO:0005743]; mitochondrial intermembrane space [GO:0005758]; mitochondrial respiratory chain [GO:0005746]; mitochondrial respiratory chain complex III [GO:0005750]; electron transporter, transferring electrons from CoQH2-cytochrome c reductase complex and cytochrome c oxidase complex activity [GO:0045155]; electron transporter, transferring elec…	cytosol [GO:0005829]; mitochondrial inner membrane [GO:0005743]; mitochondrial intermembrane space [GO:0005758]; mitochondrial respiratory chain [GO:0005746]; mitochondrial respiratory chain complex III [GO:0005750]	mitochondrial ATP synthesis coupled proton transport [GO:0042776]; mitochondrial electron transport, ubiquinol to cytochrome c [GO:0006122]; oxidative phosphorylation [GO:0006119]; protein targeting to mitochondrion [GO:0006626]	electron transporter, transferring electrons from CoQH2-cytochrome c reductase complex and cytochrome c oxidase complex activity [GO:0045155]; electron transporter, transferring electrons within CoQH2-cytochrome c reductase complex activity [GO:0045153]; heme binding [GO:0020037]; metal ion binding [GO:0046872]
YOR131C	137.230586	50.84420439	1.432446826	4.28E-05	0.001116419	P38910	STI1_YEAST	Cytochrome c1, heme protein, mitochondrial (Complex III subunit 4) (Complex III subunit IV) (Cytochrome b-c1 complex subunit 4) (Ubiquinol-cytochrome-c reductase complex cytochrome c1 subunit) (Cytochrome c-1)	YOR131C O3311 YOR3311c	218	cytoplasm [GO:0005737]; nucleus [GO:0005634]; hydrolase activity [GO:0016787]; metabolic process [GO:0008152]	cytoplasm [GO:0005737]; nucleus [GO:0005634]	metabolic process [GO:0008152]	hydrolase activity [GO:0016787]
IRC13	81.70190401	32.02646112	1.351105309	0.002561275	0.035468324	P15705	CRS5_YEAST	Putative uncharacterized hydrolase YOR131C (EC 3.-.-.-)	IRC13 YOR235W	104	integral component of membrane [GO:0016021]	integral component of membrane [GO:0016021]
HRK1	269.8158501	101.5548666	1.409715725	1.16E-07	5.65E-06	P41902	CY1_YEAST	Increased recombination centers protein 13	HRK1 YOR267C	759	cytoplasm [GO:0005737]; nucleus [GO:0005634]; ATP binding [GO:0005524]; protein kinase activity [GO:0004672]; protein serine/threonine kinase activity [GO:0004674]; cellular ion homeostasis [GO:0006873]; intracellular signal transduction [GO:0035556]	cytoplasm [GO:0005737]; nucleus [GO:0005634]	cellular ion homeostasis [GO:0006873]; intracellular signal transduction [GO:0035556]	ATP binding [GO:0005524]; protein kinase activity [GO:0004672]; protein serine/threonine kinase activity [GO:0004674]
MUM3	816.5917687	356.8530103	1.194285083	1.11E-09	7.64E-08	P07143	YOR31_YEAST	Serine/threonine-protein kinase HRK1 (EC 2.7.11.1) (Hygromycin resistance kinase 1)	MUM3 YOR298W	479	integral component of membrane [GO:0016021]; transferase activity, transferring acyl groups [GO:0016746]; ascospore wall assembly [GO:0030476]; phospholipid biosynthetic process [GO:0008654]	integral component of membrane [GO:0016021]	ascospore wall assembly [GO:0030476]; phospholipid biosynthetic process [GO:0008654]	transferase activity, transferring acyl groups [GO:0016746]
MBF1	1263.897426	931.3576499	0.440472196	0.000652081	0.011852529	Q12486	IRC13_YEAST	Protein MUM3 (Muddled meiosis protein 3)	MBF1 SUF13 YOR298C-A	151	cytoplasm [GO:0005737]; nucleus [GO:0005634]; sequence-specific DNA binding [GO:0043565]; transcription coactivator activity [GO:0003713]; positive regulation of transcription from RNA polymerase II promoter [GO:0045944]; transcription, DNA-templated [GO:0006351]	cytoplasm [GO:0005737]; nucleus [GO:0005634]	positive regulation of transcription from RNA polymerase II promoter [GO:0045944]; transcription, DNA-templated [GO:0006351]	sequence-specific DNA binding [GO:0043565]; transcription coactivator activity [GO:0003713]
CPA1	1411.667264	895.9603174	0.655893338	2.36E-06	8.66E-05	Q08630	HRK1_YEAST	Multiprotein-bridging factor 1 (Suppressor of frameshift mutations protein 13)	CPA1 YOR303W	411	carbamoyl-phosphate synthase complex [GO:0005951]; cytoplasmic stress granule [GO:0010494]; ATP binding [GO:0005524]; carbamoyl-phosphate synthase (glutamine-hydrolyzing) activity [GO:0004088]; 'de novo' pyrimidine nucleobase biosynthetic process [GO:0006207]; arginine biosynthetic process [GO:0006526]; glutamine metabolic process [GO:0006541]; urea cycle [GO:0000050]	carbamoyl-phosphate synthase complex [GO:0005951]; cytoplasmic stress granule [GO:0010494]	'de novo' pyrimidine nucleobase biosynthetic process [GO:0006207]; arginine biosynthetic process [GO:0006526]; glutamine metabolic process [GO:0006541]; urea cycle [GO:0000050]	ATP binding [GO:0005524]; carbamoyl-phosphate synthase (glutamine-hydrolyzing) activity [GO:0004088]
MCH5	243.3765553	63.83137286	1.930852616	1.15E-10	9.67E-09	Q08732	MUM3_YEAST	Carbamoyl-phosphate synthase arginine-specific small chain (CPS-A) (EC 6.3.5.5) (Arginine-specific carbamoyl-phosphate synthetase, glutamine chain)	MCH5 YOR306C	521	integral component of fungal-type vacuolar membrane [GO:0071627]; plasma membrane [GO:0005886]; riboflavin transporter activity [GO:0032217]; ion transmembrane transport [GO:0034220]; riboflavin transport [GO:0032218]	integral component of fungal-type vacuolar membrane [GO:0071627]; plasma membrane [GO:0005886]	ion transmembrane transport [GO:0034220]; riboflavin transport [GO:0032218]	riboflavin transporter activity [GO:0032217]
FAA1	402.8638132	210.8747885	0.933905601	6.33E-06	0.000210459	Q08750	MBF1_YEAST	Riboflavin transporter MCH5	FAA1 YOR317W O6136	700	lipid particle [GO:0005811]; plasma membrane [GO:0005886]; ATP binding [GO:0005524]; decanoate--CoA ligase activity [GO:0102391]; long-chain fatty acid-CoA ligase activity [GO:0004467]; medium-chain fatty acid-CoA ligase activity [GO:0031956]; long-chain fatty acid import [GO:0044539]; long-chain fatty-acyl-CoA metabolic process [GO:0035336]; sphingoid long-chain base transport [GO:1905329]	lipid particle [GO:0005811]; plasma membrane [GO:0005886]	long-chain fatty acid import [GO:0044539]; long-chain fatty-acyl-CoA metabolic process [GO:0035336]; sphingoid long-chain base transport [GO:1905329]	ATP binding [GO:0005524]; decanoate--CoA ligase activity [GO:0102391]; long-chain fatty acid-CoA ligase activity [GO:0004467]; medium-chain fatty acid-CoA ligase activity [GO:0031956]
YOR338W	648.2721878	255.7061443	1.342112852	1.90E-11	1.75E-09	O14467	CARA_YEAST	Long-chain-fatty-acid--CoA ligase 1 (EC 6.2.1.3) (Fatty acid activator 1) (Long-chain acyl-CoA synthetase 1)	YOR338W O6265	363	SAGA-type complex [GO:0070461]; chromatin binding [GO:0003682]; DNA binding [GO:0003677]; transcription coactivator activity [GO:0003713]; transcription factor activity, sequence-specific DNA binding [GO:0003700]; chromatin remodeling [GO:0006338]; histone acetylation [GO:0016573]; positive regulation of histone acetylation [GO:0035066]	SAGA-type complex [GO:0070461]	chromatin remodeling [GO:0006338]; histone acetylation [GO:0016573]; positive regulation of histone acetylation [GO:0035066]	chromatin binding [GO:0003682]; DNA binding [GO:0003677]; transcription coactivator activity [GO:0003713]; transcription factor activity, sequence-specific DNA binding [GO:0003700]
FIT2	1483.532184	627.1165516	1.242230723	7.86E-16	1.34E-13	P07258	MCH5_YEAST	SWIRM domain-containing protein YOR338W	FIT2 YOR382W	153	anchored component of membrane [GO:0031225]; extracellular region [GO:0005576]; fungal-type cell wall [GO:0009277]; ion transport [GO:0006811]; iron ion homeostasis [GO:0055072]; siderophore transport [GO:0015891]	anchored component of membrane [GO:0031225]; extracellular region [GO:0005576]; fungal-type cell wall [GO:0009277]	ion transport [GO:0006811]; iron ion homeostasis [GO:0055072]; siderophore transport [GO:0015891]
FIT3	2588.46906	1261.628157	1.03681231	1.10E-09	7.60E-08	Q08777	LCF1_YEAST	Facilitator of iron transport 2	FIT3 YOR383C	204	anchored component of membrane [GO:0031225]; extracellular region [GO:0005576]; fungal-type cell wall [GO:0009277]; ion transport [GO:0006811]; iron ion homeostasis [GO:0055072]; siderophore transport [GO:0015891]	anchored component of membrane [GO:0031225]; extracellular region [GO:0005576]; fungal-type cell wall [GO:0009277]	ion transport [GO:0006811]; iron ion homeostasis [GO:0055072]; siderophore transport [GO:0015891]
ATP15	1181.679359	902.3395946	0.389096225	0.002139044	0.031507751	P30624	YO338_YEAST	Facilitator of iron transport 3	ATP15 YPL271W P0345	62	mitochondrial proton-transporting ATP synthase, central stalk [GO:0005756]; proton-transporting ATP synthase activity, rotational mechanism [GO:0046933]; ATP synthesis coupled proton transport [GO:0015986]	mitochondrial proton-transporting ATP synthase, central stalk [GO:0005756]	ATP synthesis coupled proton transport [GO:0015986]	proton-transporting ATP synthase activity, rotational mechanism [GO:0046933]
YPL251W	144.1770158	29.6747386	2.280533967	3.61E-09	2.38E-07	Q99326	FIT2_YEAST	ATP synthase subunit epsilon, mitochondrial (ATPase subunit epsilon)	YPL251W P1010	100
HSP82	3723.301923	1281.917389	1.538279316	6.28E-17	1.23E-14	Q08906	FIT3_YEAST	Putative uncharacterized protein YPL251W	HSP82 HSP90 YPL240C	709	cytoplasm [GO:0005737]; ATP binding [GO:0005524]; ATPase activity, coupled [GO:0042623]; identical protein binding [GO:0042802]; unfolded protein binding [GO:0051082]; 'de novo' protein folding [GO:0006458]; box C/D snoRNP assembly [GO:0000492]; positive regulation of telomere maintenance via telomerase [GO:0032212]; proteasome assembly [GO:0043248]; protein maturation [GO:0051604]; protein refol…	cytoplasm [GO:0005737]	'de novo' protein folding [GO:0006458]; box C/D snoRNP assembly [GO:0000492]; positive regulation of telomere maintenance via telomerase [GO:0032212]; proteasome assembly [GO:0043248]; protein maturation [GO:0051604]; protein refolding [GO:0042026]; protein targeting to mitochondrion [GO:0006626]; regulation of telomere maintenance [GO:0032204]; response to osmotic stress [GO:0006970]	ATPase activity, coupled [GO:0042623]; ATP binding [GO:0005524]; identical protein binding [GO:0042802]; unfolded protein binding [GO:0051082]
YAR1	412.4273166	136.1317248	1.599136572	3.54E-12	3.51E-10	Q08907	ATP5E_YEAST	ATP-dependent molecular chaperone HSP82 (82 kDa heat shock protein) (Heat shock protein Hsp90 heat-inducible isoform)	YAR1 YPL239W	200	nucleus [GO:0005634]; unfolded protein binding [GO:0051082]; cellular response to oxidative stress [GO:0034599]; regulation of protein localization [GO:0032880]; response to osmotic stress [GO:0006970]; ribosomal small subunit biogenesis [GO:0042274]; ribosomal small subunit export from nucleus [GO:0000056]	nucleus [GO:0005634]	cellular response to oxidative stress [GO:0034599]; regulation of protein localization [GO:0032880]; response to osmotic stress [GO:0006970]; ribosomal small subunit biogenesis [GO:0042274]; ribosomal small subunit export from nucleus [GO:0000056]	unfolded protein binding [GO:0051082]
YPL238C	22.56817514	0	Inf	0.001686147	0.026064697	P21306	YP251_YEAST	Ankyrin repeat-containing protein YAR1	YPL238C P1051	129	integral component of membrane [GO:0016021]	integral component of membrane [GO:0016021]
OXR1	274.6681562	123.3036599	1.155474038	6.88E-06	0.000225225	Q12058	HSP82_YEAST	Putative uncharacterized protein YPL238C	OXR1 YPL196W	273	mitochondrion [GO:0005739]; cellular response to oxidative stress [GO:0034599]	mitochondrion [GO:0005739]	cellular response to oxidative stress [GO:0034599]
COA2	337.0007257	206.9950951	0.703155116	0.00084271	0.01477966	P02829	YAR1_YEAST	Oxidation resistance protein 1	COA2 YPL189C-A	68	mitochondrial inner membrane [GO:0005743]; mitochondrial matrix [GO:0005759]; mitochondrial respiratory chain complex IV assembly [GO:0033617]	mitochondrial inner membrane [GO:0005743]; mitochondrial matrix [GO:0005759]	mitochondrial respiratory chain complex IV assembly [GO:0033617]
OYE3	65.31014781	0	Inf	0.000211705	0.004598708	P46683	YP238_YEAST	Cytochrome c oxidase assembly factor 2	OYE3 YPL171C P2291	400	FMN binding [GO:0010181]; NADPH dehydrogenase activity [GO:0003959]; pentaerythritol trinitrate reductase activity [GO:0018548]; trichloro-p-hydroquinone reductive dehalogenase activity [GO:0052690]; apoptotic process [GO:0006915]		apoptotic process [GO:0006915]	FMN binding [GO:0010181]; NADPH dehydrogenase activity [GO:0003959]; pentaerythritol trinitrate reductase activity [GO:0018548]; trichloro-p-hydroquinone reductive dehalogenase activity [GO:0052690]
MEX67	205.8675673	74.49565753	1.466488328	5.28E-07	2.26E-05	Q99401	OXR1_YEAST	NADPH dehydrogenase 3 (EC 1.6.99.1) (Old yellow enzyme 3)	MEX67 YPL169C P2520	599	cytoplasm [GO:0005737]; nuclear RNA export factor complex [GO:0042272]; RNA binding [GO:0003723]; mRNA export from nucleus [GO:0006406]; poly(A)+ mRNA export from nucleus [GO:0016973]; ribosomal large subunit export from nucleus [GO:0000055]; ribosomal small subunit export from nucleus [GO:0000056]	cytoplasm [GO:0005737]; nuclear RNA export factor complex [GO:0042272]	mRNA export from nucleus [GO:0006406]; poly(A)+ mRNA export from nucleus [GO:0016973]; ribosomal large subunit export from nucleus [GO:0000055]; ribosomal small subunit export from nucleus [GO:0000056]	RNA binding [GO:0003723]
PRP46	194.8777569	97.32634099	1.00166721	0.000323872	0.006664953	Q08952	COA2_YEAST	mRNA export factor MEX67	PRP46 CWC1 NTC50 YPL151C P2594	451	catalytic step 2 spliceosome [GO:0071013]; Cul4-RING E3 ubiquitin ligase complex [GO:0080008]; cytoplasm [GO:0005737]; precatalytic spliceosome [GO:0071011]; Prp19 complex [GO:0000974]; spliceosomal complex [GO:0005681]; mRNA splicing, via spliceosome [GO:0000398]	catalytic step 2 spliceosome [GO:0071013]; Cul4-RING E3 ubiquitin ligase complex [GO:0080008]; cytoplasm [GO:0005737]; precatalytic spliceosome [GO:0071011]; Prp19 complex [GO:0000974]; spliceosomal complex [GO:0005681]	mRNA splicing, via spliceosome [GO:0000398]
SSE1	846.2074055	442.3605891	0.935788453	3.11E-07	1.43E-05	Q3E823	OYE3_YEAST	Pre-mRNA-splicing factor PRP46 (Complexed with CEF1 protein 1) (PRP nineteen-associated complex protein 50) (PRP19-associated complex protein 50) (Pre-mRNA-processing protein 46)	SSE1 MSI3 YPL106C LPG3C	693	cytoplasm [GO:0005737]; polysome [GO:0005844]; adenyl-nucleotide exchange factor activity [GO:0000774]; ATP binding [GO:0005524]; calmodulin binding [GO:0005516]; peptide binding [GO:0042277]; protein folding [GO:0006457]; protein refolding [GO:0042026]	cytoplasm [GO:0005737]; polysome [GO:0005844]	protein folding [GO:0006457]; protein refolding [GO:0042026]	adenyl-nucleotide exchange factor activity [GO:0000774]; ATP binding [GO:0005524]; calmodulin binding [GO:0005516]; peptide binding [GO:0042277]
ATP4	1241.034621	720.8052322	0.783861974	7.87E-08	4.02E-06	P41816	MEX67_YEAST	Heat shock protein homolog SSE1 (Chaperone protein MSI3)	ATP4 YPL078C LPF7C	244	mitochondrial proton-transporting ATP synthase, stator stalk [GO:0000274]; hydrogen ion transmembrane transporter activity [GO:0015078]; ATP hydrolysis coupled cation transmembrane transport [GO:0099132]; ATP synthesis coupled proton transport [GO:0015986]; protein complex oligomerization [GO:0035786]	mitochondrial proton-transporting ATP synthase, stator stalk [GO:0000274]	ATP hydrolysis coupled cation transmembrane transport [GO:0099132]; ATP synthesis coupled proton transport [GO:0015986]; protein complex oligomerization [GO:0035786]	hydrogen ion transmembrane transporter activity [GO:0015078]
LGE1	98.06367035	44.7950622	1.130379049	0.003478101	0.044891141	Q99257	PRP46_YEAST	ATP synthase subunit 4, mitochondrial	LGE1 YPL055C	332	nucleus [GO:0005634]; histone methylation [GO:0016571]; histone ubiquitination [GO:0016574]; premeiotic DNA replication [GO:0006279]; protein monoubiquitination [GO:0006513]; regulation of transcription, DNA-templated [GO:0006355]; transcription, DNA-templated [GO:0006351]	nucleus [GO:0005634]	histone methylation [GO:0016571]; histone ubiquitination [GO:0016574]; premeiotic DNA replication [GO:0006279]; protein monoubiquitination [GO:0006513]; regulation of transcription, DNA-templated [GO:0006355]; transcription, DNA-templated [GO:0006351]
MET12	138.6426149	65.2939159	1.086350297	0.000966538	0.016515624	Q12417	HSP7F_YEAST	Transcriptional regulatory protein LGE1 (Large cells protein 1)	MET12 YPL023C LPB8C	657	cytosol [GO:0005829]; methylenetetrahydrofolate reductase (NAD(P)H) activity [GO:0004489]; methionine metabolic process [GO:0006555]; one-carbon metabolic process [GO:0006730]; tetrahydrofolate interconversion [GO:0035999]	cytosol [GO:0005829]	methionine metabolic process [GO:0006555]; one-carbon metabolic process [GO:0006730]; tetrahydrofolate interconversion [GO:0035999]	methylenetetrahydrofolate reductase (NAD(P)H) activity [GO:0004489]
YPL014W	354.2860234	208.8766665	0.762263213	0.000279166	0.005798808	P32589	ATPF_YEAST	Methylenetetrahydrofolate reductase 1 (EC 1.5.1.20)	YPL014W	381	cytoplasm [GO:0005737]; nucleus [GO:0005634]; cyclin-dependent protein serine/threonine kinase inhibitor activity [GO:0004861]; negative regulation of cyclin-dependent protein serine/threonine kinase activity involved in G1/S transition of mitotic cell cycle [GO:0031658]	cytoplasm [GO:0005737]; nucleus [GO:0005634]	negative regulation of cyclin-dependent protein serine/threonine kinase activity involved in G1/S transition of mitotic cell cycle [GO:0031658]	cyclin-dependent protein serine/threonine kinase inhibitor activity [GO:0004861]
ATP20	383.0650697	205.7192987	0.896912337	1.88E-05	0.000540336	P05626	LGE1_YEAST	Uncharacterized protein YPL014W	ATP20 YPR020W YP9531.14	115	mitochondrial proton-transporting ATP synthase complex, coupling factor F(o) [GO:0000276]; hydrogen ion transmembrane transporter activity [GO:0015078]; ATP hydrolysis coupled cation transmembrane transport [GO:0099132]; ATP synthesis coupled proton transport [GO:0015986]; cristae formation [GO:0042407]; protein complex oligomerization [GO:0035786]	mitochondrial proton-transporting ATP synthase complex, coupling factor F(o) [GO:0000276]	ATP hydrolysis coupled cation transmembrane transport [GO:0099132]; ATP synthesis coupled proton transport [GO:0015986]; cristae formation [GO:0042407]; protein complex oligomerization [GO:0035786]	hydrogen ion transmembrane transporter activity [GO:0015078]
FCY1	674.2104893	447.2035403	0.592267463	0.001033576	0.017305247	Q02796	MTHR1_YEAST	ATP synthase subunit g, mitochondrial (ATPase subunit g)	FCY1 YPR062W YP9499.17	158	5-fluorocytosine deaminase activity [GO:0102480]; cytosine deaminase activity [GO:0004131]; zinc ion binding [GO:0008270]; cytidine metabolic process [GO:0046087]; cytosine metabolic process [GO:0019858]; pyrimidine-containing compound salvage [GO:0008655]; RNA modification [GO:0009451]; UMP salvage [GO:0044206]		cytidine metabolic process [GO:0046087]; cytosine metabolic process [GO:0019858]; pyrimidine-containing compound salvage [GO:0008655]; RNA modification [GO:0009451]; UMP salvage [GO:0044206]	5-fluorocytosine deaminase activity [GO:0102480]; cytosine deaminase activity [GO:0004131]; zinc ion binding [GO:0008270]
YPR092W	33.23755779	0	Inf	0.002374048	0.033643027	P46151	YP014_YEAST	Cytosine deaminase (EC 3.5.4.1) (Cytosine aminohydrolase)	YPR092W P9513.15A	101
ASR1	186.0688238	93.78832026	0.988356174	0.00046839	0.009076941	Q02606	ATPN_YEAST	Putative uncharacterized protein YPR092W	ASR1 YPR093C	288	cytoplasm [GO:0005737]; nucleus [GO:0005634]; metal ion binding [GO:0046872]; ubiquitin-protein transferase activity [GO:0004842]; protein ubiquitination [GO:0016567]; response to ethanol [GO:0045471]; septin ring assembly [GO:0000921]	cytoplasm [GO:0005737]; nucleus [GO:0005634]	protein ubiquitination [GO:0016567]; response to ethanol [GO:0045471]; septin ring assembly [GO:0000921]	metal ion binding [GO:0046872]; ubiquitin-protein transferase activity [GO:0004842]
PIS1	321.3255166	204.0352063	0.655217439	0.001834793	0.028036479	Q12233	FCY1_YEAST	Alcohol-sensitive RING finger protein 1	PIS1 PIS YPR113W P8283.5	220	endoplasmic reticulum membrane [GO:0005789]; Golgi apparatus [GO:0005794]; integral component of membrane [GO:0016021]; mitochondrial outer membrane [GO:0005741]; CDP-diacylglycerol-inositol 3-phosphatidyltransferase activity [GO:0003881]; phosphatidylinositol biosynthetic process [GO:0006661]	endoplasmic reticulum membrane [GO:0005789]; Golgi apparatus [GO:0005794]; integral component of membrane [GO:0016021]; mitochondrial outer membrane [GO:0005741]	phosphatidylinositol biosynthetic process [GO:0006661]	CDP-diacylglycerol-inositol 3-phosphatidyltransferase activity [GO:0003881]
PIN3	524.0785882	158.156763	1.728427918	2.47E-15	3.96E-13	Q12178	YP092_YEAST	CDP-diacylglycerol--inositol 3-phosphatidyltransferase (EC 2.7.8.11) (Phosphatidylinositol synthase) (PI synthase) (PtdIns synthase)	PIN3 LSB2 YPR154W	215	actin cortical patch [GO:0030479]; cytoplasm [GO:0005737]; nucleus [GO:0005634]; negative regulation of Arp2/3 complex-mediated actin nucleation [GO:0034316]	actin cortical patch [GO:0030479]; cytoplasm [GO:0005737]; nucleus [GO:0005634]	negative regulation of Arp2/3 complex-mediated actin nucleation [GO:0034316]
NCA2	323.9325031	94.45893235	1.7779341	4.66E-11	4.13E-09	O13586	ASR1_YEAST	[PSI+] inducibility protein 3 (LAS seventeen-binding protein 2) (LAS17-binding protein 2)	NCA2 YPR155C	616	integral component of membrane [GO:0016021]; mitochondrial membrane [GO:0031966]; aerobic respiration [GO:0009060]; mRNA metabolic process [GO:0016071]	integral component of membrane [GO:0016021]; mitochondrial membrane [GO:0031966]	aerobic respiration [GO:0009060]; mRNA metabolic process [GO:0016071]
QCR2	412.8721662	165.6122618	1.31788567	2.16E-09	1.45E-07	Q06834	PIS_YEAST	Nuclear control of ATPase protein 2	QCR2 COR2 UCR2 YPR191W P9677.6	368	mitochondrial crista [GO:0030061]; mitochondrial respiratory chain complex III [GO:0005750]; mitochondrion [GO:0005739]; metalloendopeptidase activity [GO:0004222]; zinc ion binding [GO:0008270]; aerobic respiration [GO:0009060]; hydrogen ion transmembrane transport [GO:1902600]; mitochondrial electron transport, ubiquinol to cytochrome c [GO:0006122]; protein processing [GO:0016485]	mitochondrial crista [GO:0030061]; mitochondrial respiratory chain complex III [GO:0005750]; mitochondrion [GO:0005739]	aerobic respiration [GO:0009060]; hydrogen ion transmembrane transport [GO:1902600]; mitochondrial electron transport, ubiquinol to cytochrome c [GO:0006122]; protein processing [GO:0016485]	metalloendopeptidase activity [GO:0004222]; zinc ion binding [GO:0008270]
