# Supplementary material for: Temporal profiling of redox-dependent heterogeneity in single cells
Source: eLife journal article supplement (doi:10.7554/elife.37623), 2018-06-05
Supplement: supp [file elife-37623-supp-v1.zip › elife_poa_e37623_Supplementary_File_12.docx]

#### Supplementary File 12. Comparison of wild type and knockout strains OxD values (related to Figure 7).

| Strain | Day 1 | Day2 |
| --- | --- | --- |
| *Δhsp30* | 4.51E-07 | 8.78E-08 |
| *Δsse2* | 1.85E-02 | 2.62E-02 |
| *Δyro2* | 3.75E-03 | 1.91E-03 |
| *Δhsp78* | 1.10E-02 | 2.52E-03 |

The p-values for T-student test calculated using two tail similar variance
