# Supplementary figures and images for: Temporal profiling of redox-dependent heterogeneity in single cells
Source: eLife journal article supplement (doi:10.7554/elife.37623), 2018-06-05

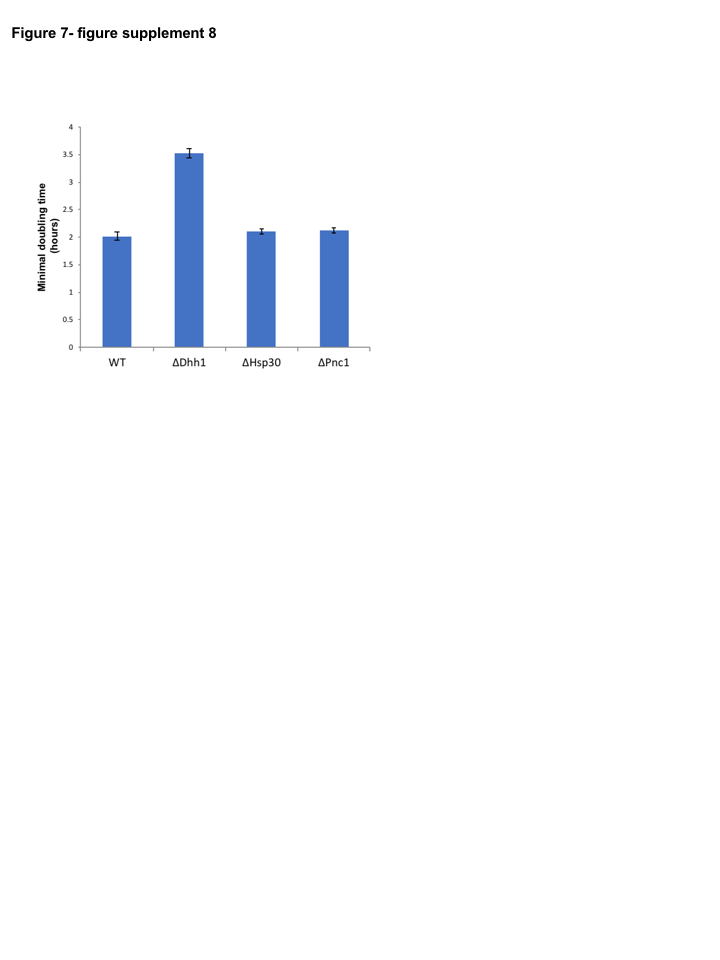

Supplement: supp [file elife-37623-supp-v1.zip › elife_poa_e37623_Figure_7_figure_supplement_2.tif]

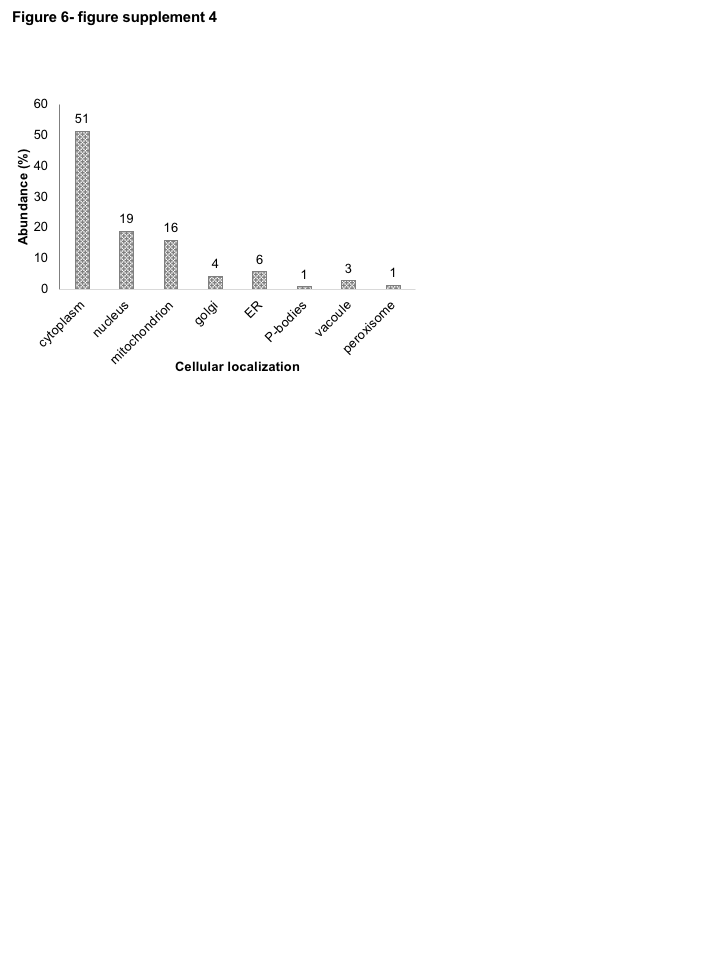

Supplement: supp [file elife-37623-supp-v1.zip › elife_poa_e37623_Figure_6_figure_supplement_1.tif]

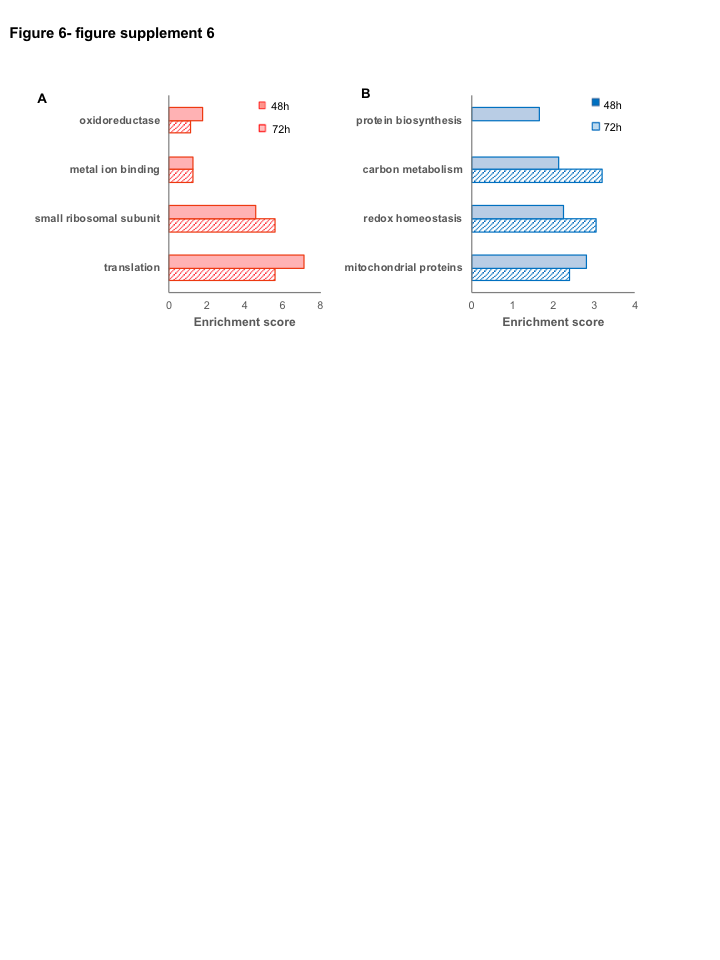

Supplement: supp [file elife-37623-supp-v1.zip › elife_poa_e37623_Figure_6_figure_supplement_3.tif]

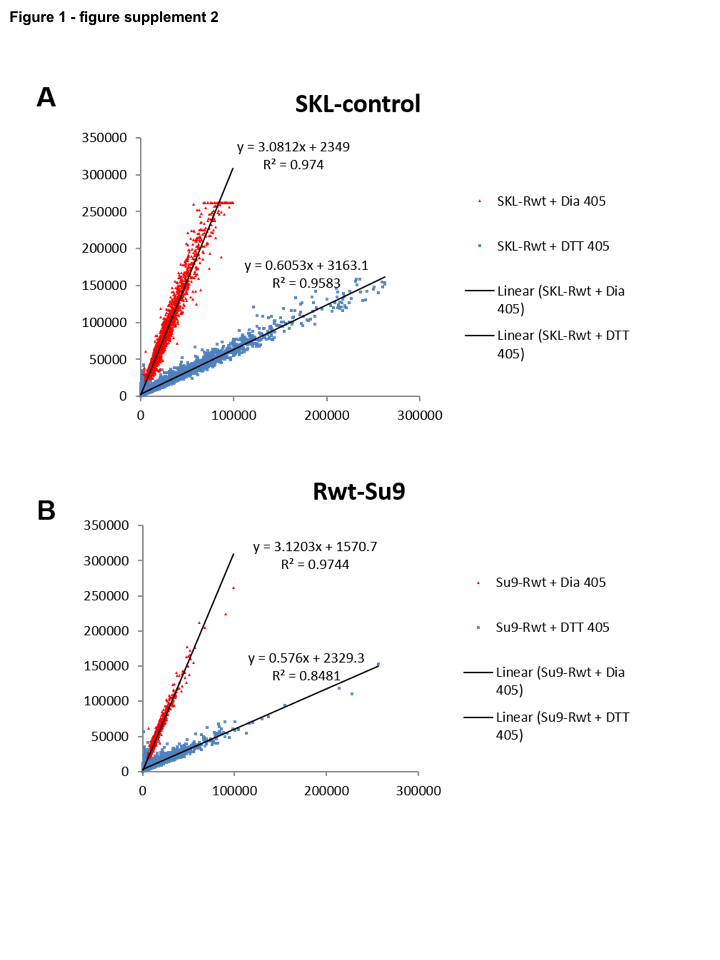

Supplement: supp [file elife-37623-supp-v1.zip › elife_poa_e37623_Figure_1_figure_supplement_2.tif]

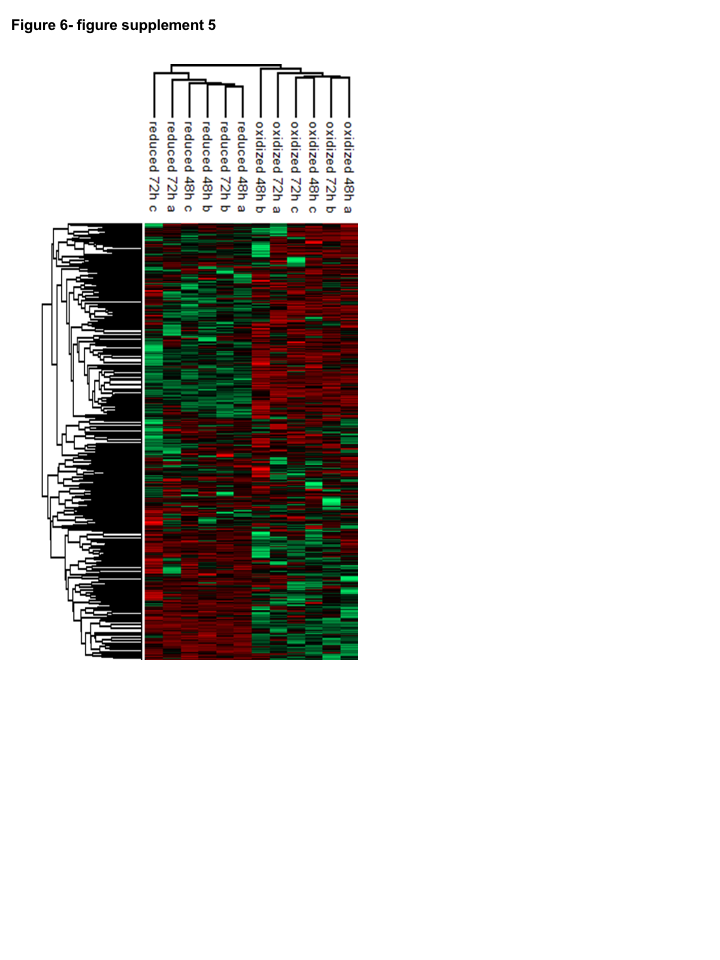

Supplement: supp [file elife-37623-supp-v1.zip › elife_poa_e37623_Figure_6_figure_supplement_2.tif]

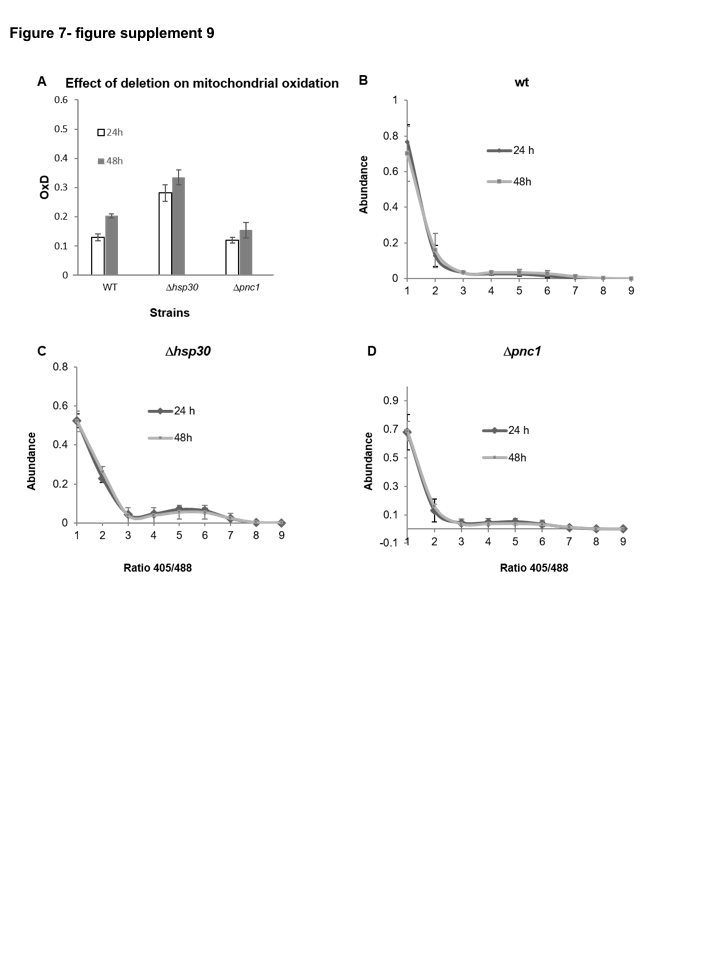

Supplement: supp [file elife-37623-supp-v1.zip › elife_poa_e37623_Figure_7_figure_supplement_3.tif]

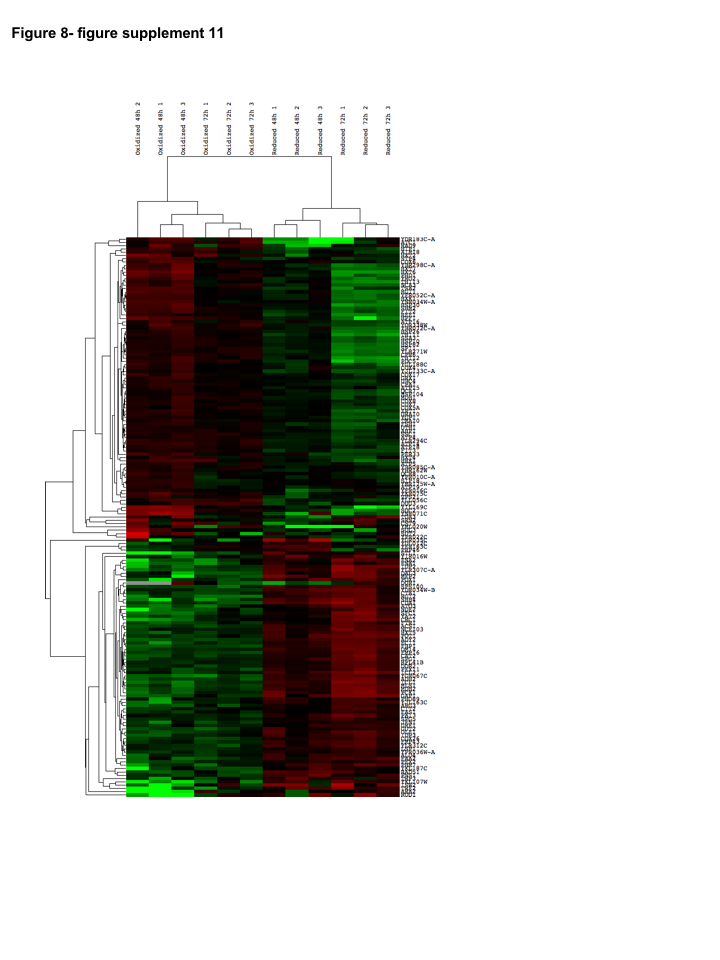

Supplement: supp [file elife-37623-supp-v1.zip › elife_poa_e37623_Figure_8_figure_supplement_1.tif]

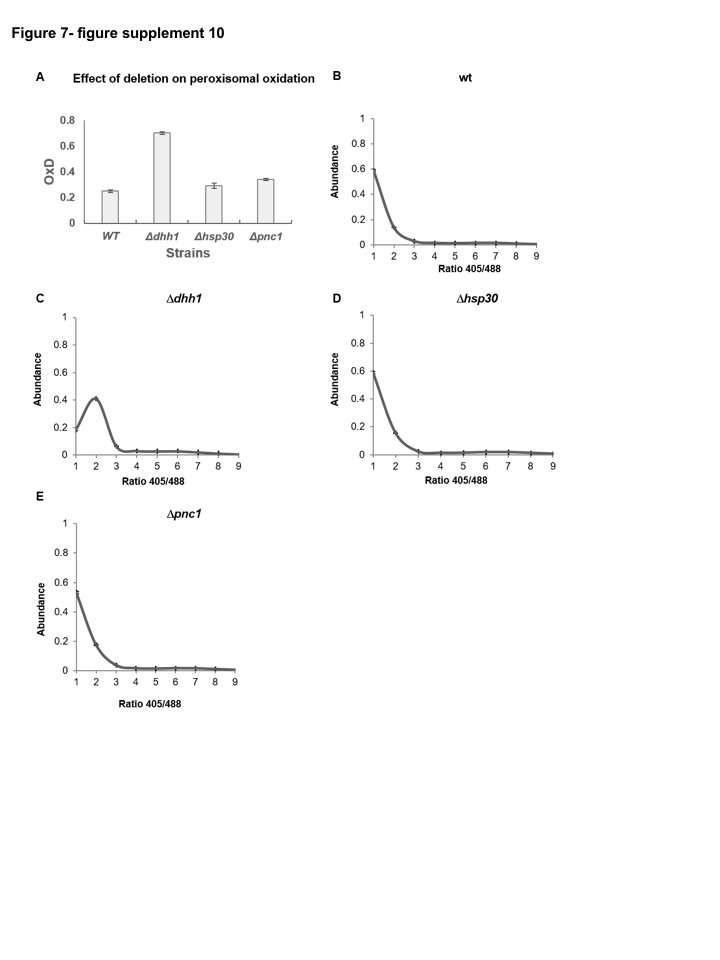

Supplement: supp [file elife-37623-supp-v1.zip › elife_poa_e37623_Figure_7_figure_supplement_4.tif]

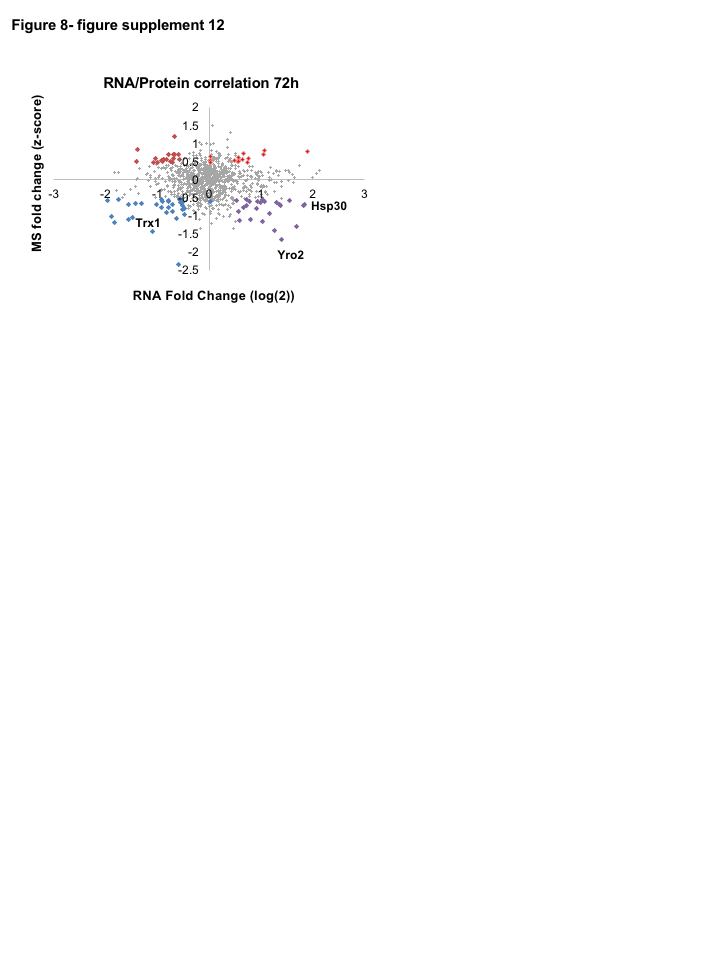

Supplement: supp [file elife-37623-supp-v1.zip › elife_poa_e37623_Figure_8_figure_supplement_2.tif]

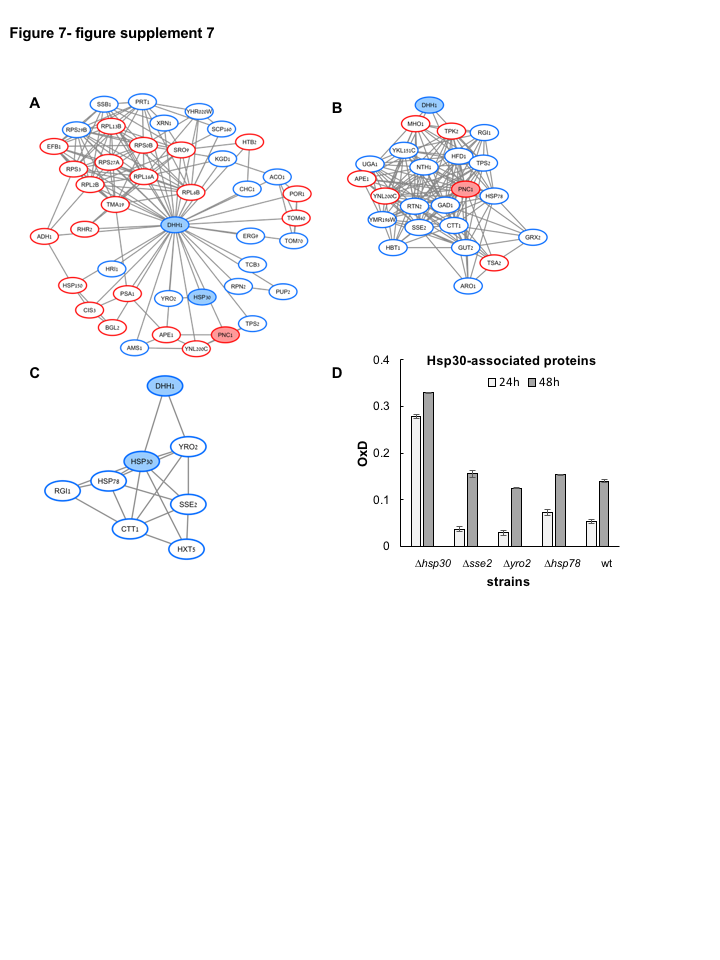

Supplement: supp [file elife-37623-supp-v1.zip › elife_poa_e37623_Figure_7_figure_supplement_1.tif]

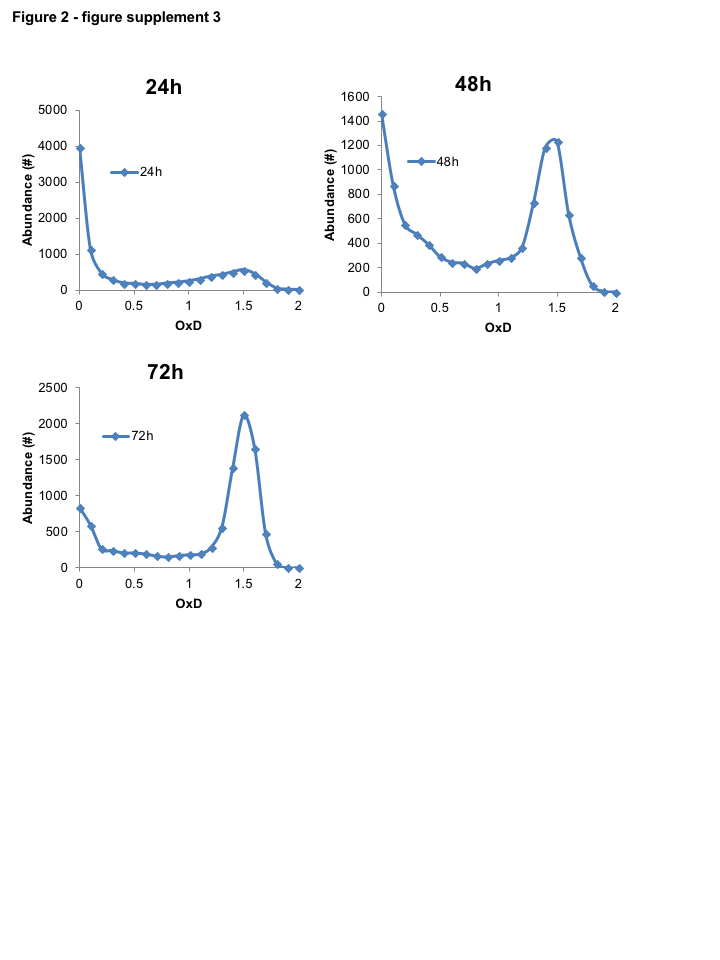

Supplement: supp [file elife-37623-supp-v1.zip › elife_poa_e37623_Figure_2_figure_supplement_1.tif]

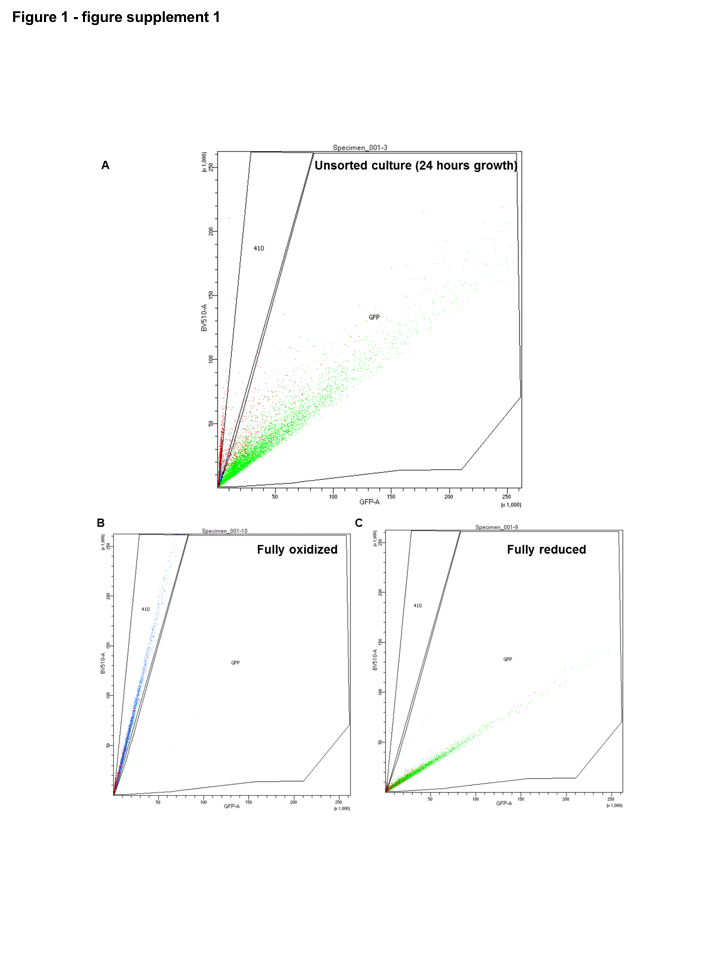

Supplement: supp [file elife-37623-supp-v1.zip › elife_poa_e37623_Figure_1_figure_supplement_1.tif]
